# Supplementary material for: A serine–arginine-rich (SR) splicing factor modulates alternative splicing of over a thousand genes in Toxoplasma gondii
Source: Oxford University Press journal article supplement (doi:10.1093/nar/gkv311), 2015-04-13
Supplement: gkv311_Supplementary_Data.zip [file gkv311_Supplementary_Data.zip]

Archive with 15 entries (15 files):
- nar-03398-a-2014-File009.docx
- nar-03398-a-2014-File019.txt
- nar-03398-a-2014-File011.txt
- nar-03398-a-2014-File013.txt
- nar-03398-a-2014-File012.txt
- nar-03398-a-2014-File023.txt
- nar-03398-a-2014-File016.txt
- nar-03398-a-2014-File017.txt
- nar-03398-a-2014-File021.txt
- nar-03398-a-2014-File015.txt
- nar-03398-a-2014-File010.pdf
- nar-03398-a-2014-File014.txt
- nar-03398-a-2014-File020.txt
- nar-03398-a-2014-File022.txt
- nar-03398-a-2014-File018.txt
