# Supplementary material for: A serine–arginine-rich (SR) splicing factor modulates alternative splicing of over a thousand genes in Toxoplasma gondii
Source: Oxford University Press journal article supplement (doi:10.1093/nar/gkv311), 2015-04-13
Supplement: gkv311_Supplementary_Data.zip [file gkv311_Supplementary_Data.zip › nar-03398-a-2014-File010.pdf]

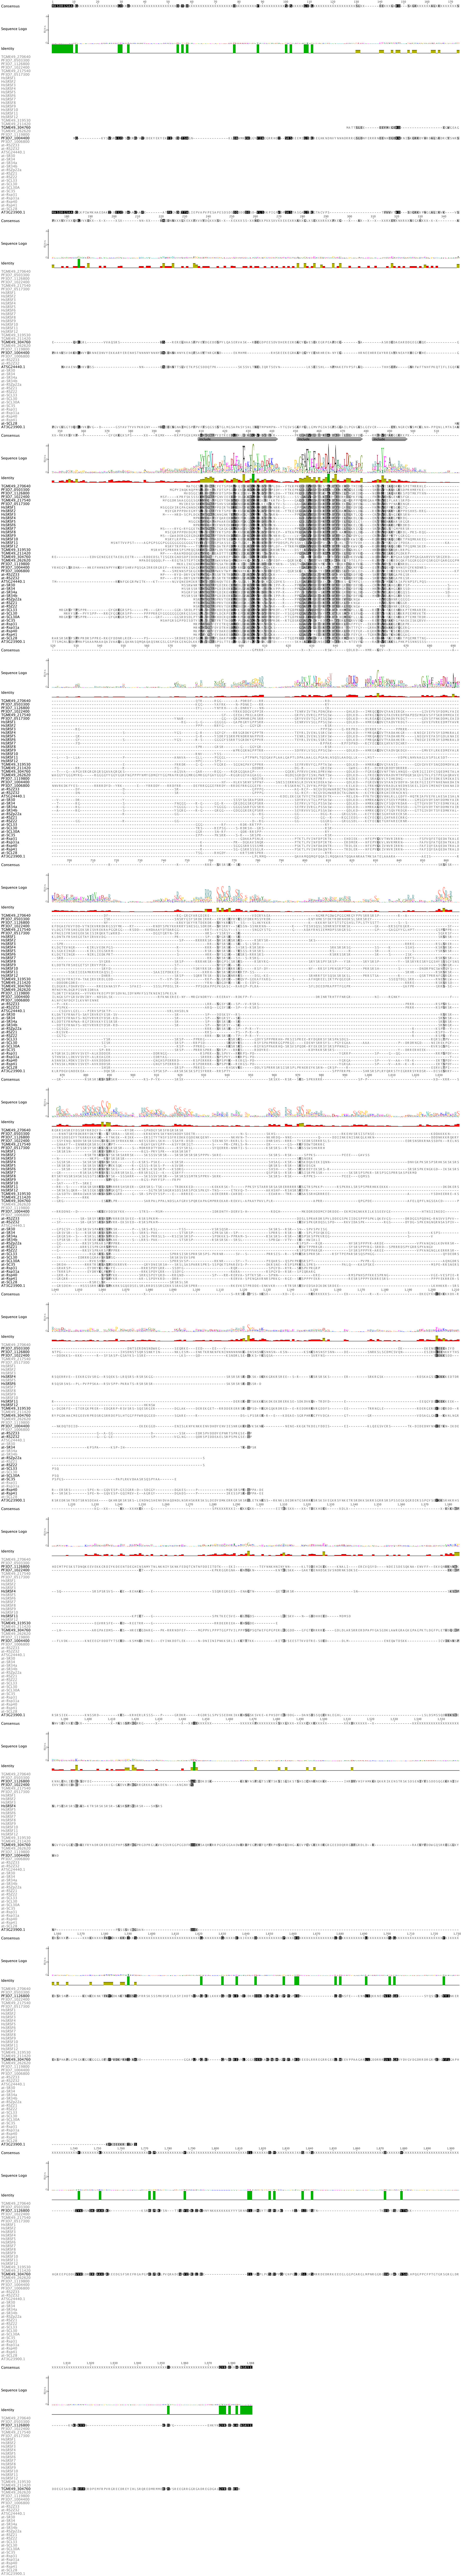

**Supplementary Figure S1:** Alignment used to generate phylogeny of SR proteins. Shading indicates (in order from darkest to lightest), similarity of 100%, 80–100%, 60–80%, and less than 60%, scored using the Blosum62 matrix. Regions marked "Include" were used to create the phylogenetic tree.

**0 vs 4 h**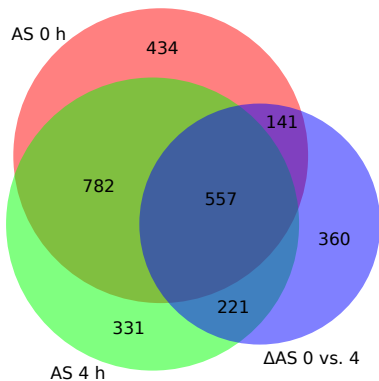**0 vs 8 h**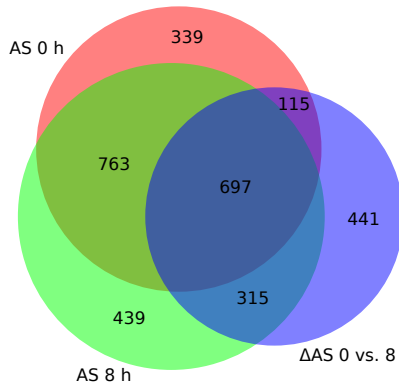**0 vs 24 h**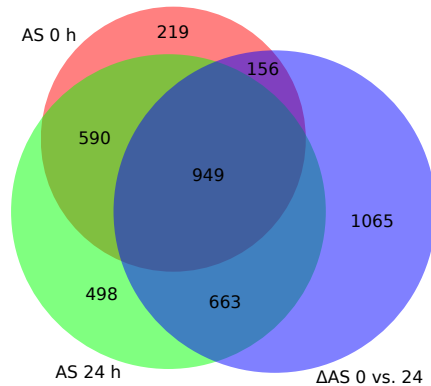

**Supplementary Figure S2:** Proportional Venn diagrams comparing genes identified as alternatively spliced in a single condition (not including intron retention), versus genes identified as having their alternative splicing changed after overexpression of TgSR3. Red regions represent alternatively-spliced genes in a single, uninduced condition; green regions represent alternatively-spliced genes in a single, induced condition, after 4, 8 or 24 hours overexpression of TgSR3; blue regions represent genes that had their alternative splicing altered between two conditions, after overexpression.
