# Supplementary material for: A serine–arginine-rich (SR) splicing factor modulates alternative splicing of over a thousand genes in Toxoplasma gondii
Source: Oxford University Press journal article supplement (doi:10.1093/nar/gkv311), 2015-04-13
Supplement: gkv311_Supplementary_Data.zip [file gkv311_Supplementary_Data.zip › nar-03398-a-2014-File011.txt]

ID in phylogeny	NCBI accession number
HsSRSF1	NP_008855.1
HsSRSF2	NP_001182356.1
HsSRSF3	NP_003008.1
HsSRSF4	NP_005617.2
HsSRSF5	NP_001034554.1
HsSRSF6	NP_006266.2
HsSRSF7	NP_001026854.1
HsSRSF8	NP_115285.1
HsSRSF9	NP_003760.1
HsSRSF10	NP_006616.1
HsSRSF11	NP_004759.1
HsSRSF12	NP_542781.3
at-RS2Z32	NP_190918.3
at-RS2Z33	NP_850280.1
at-RSZ21	NP_564208.1
at-RSZ22	NP_194886.1
at-RSZp22a	NP_180035.1
at-Rsp31	NP_567120.1
at-Rsp31a	NP_182184.1
at-Rsp40	NP_194280.1
at-Rsp41	NP_200017.2
at-SC35	NP_851261.1
at-SCL28	NP_197382.3
at-SCL30	NP_567021.1
at-SCL30A	NP_187966.1
at-SCL33	NP_564685.4
at-SR30	NP_172386.3
at-SR34	NP_850933.1
at-SR34a	NP_190512.3
at-SR34b	NP_567235.3
AT3G23900.1	NP_189032.2
AT5G24440.1	NP_197832.1
