# Supplementary material for: A serine–arginine-rich (SR) splicing factor modulates alternative splicing of over a thousand genes in Toxoplasma gondii
Source: Oxford University Press journal article supplement (doi:10.1093/nar/gkv311), 2015-04-13
Supplement: gkv311_Supplementary_Data.zip [file gkv311_Supplementary_Data.zip › nar-03398-a-2014-File012.txt]

Primer name	Sequence
TgSR3-LIC SP	TACTTCCAATCCAATTTAGCCTTCTGTTGCCGTGTTCCG
TgSR3-LIC ASP	TCCTCCACTTCCAATTTTAGCTTTCCTGTGAGAAAAAAATTGAGAC
TgSR3-DD-XmaI SP	AACTCCCGGGTTCGACAACATGCCGCGC
TgSR3-DD-AatII ASP	TCCTGACGTCTCATTTCCTTCTGTCGTCGCTG
