# Supplementary material for: A serine–arginine-rich (SR) splicing factor modulates alternative splicing of over a thousand genes in Toxoplasma gondii
Source: Oxford University Press journal article supplement (doi:10.1093/nar/gkv311), 2015-04-13
Supplement: gkv311_Supplementary_Data.zip [file gkv311_Supplementary_Data.zip › nar-03398-a-2014-File014.txt]

	logFC	AveExpr	t	P.Value	adj.P.Val	B
TGGT1_215970	1.68350732071571	7.68070473222344	17.7871747588396	4.02593679500024e-09	2.74005258267717e-05	11.4658564652478
TGGT1_309400	1.18452373790841	7.36098100361875	15.0061594994142	2.21810356677005e-08	7.54820643771849e-05	9.89059896860806
TGGT1_278510	-0.895483708564349	8.21536830855332	-13.3201359697838	7.23807150602825e-08	0.000128967166895523	8.77746946242066
TGGT1_320300	0.829925989263768	8.42777771331006	12.9832888072847	9.31635468665491e-08	0.000128967166895523	8.5321595513251
TGGT1_203980	0.819987749873122	8.79380731663821	12.9610967953452	9.47452004815773e-08	0.000128967166895523	8.51671104394613
TGGT1_208740	1.27493802193915	5.55201736807637	12.5391060106919	1.31144376761117e-07	0.000144143757405547	8.07815892209382
TGGT1_323020	-0.908312707310524	6.35558582724992	-11.9664393703014	2.07129112202167e-07	0.000176215092205994	7.72744221636848
TGGT1_315900	1.20297309676143	6.358019713978	11.659171822547	2.66811626521514e-07	0.000201768881122825	7.4842636369321
TGGT1_315123	-1.50618822520755	4.15778175956202	-12.3831441007564	1.48252468680404e-07	0.000144143757405547	7.39826686651357
TGGT1_278630	1.63109645858139	5.43737202182234	11.1489696745289	4.11604595535615e-07	0.00028013808772154	6.99837099939716
TGGT1_222410	0.980132423167362	6.68178325607492	10.847924053358	5.35893209088293e-07	0.000331571743732266	6.80695642547245
TGGT1_257390	0.797748738568978	6.69373967286178	10.7060406237428	6.08179127988227e-07	0.000339981101391774	6.68155656850281
TGGT1_277685	-0.838125630322234	5.82018042781203	-10.6331435087552	6.49390878356312e-07	0.000339981101391774	6.60761744320511
TGGT1_271145	1.11442560775901	6.51712075051882	10.2995378598892	8.80962213143257e-07	0.000428273487332358	6.31640689633559
TGGT1_310560	0.831784564786754	7.46032485827061	9.84608243909571	1.35164235205122e-06	0.000496307601492871	5.87031081215779
TGGT1_304650	0.648496066962765	7.12556105134048	9.82037313641237	1.38551931066185e-06	0.000496307601492871	5.85093084324577
TGGT1_259670	-1.55675889871846	3.97866550853881	-10.1206807308137	1.04101295221869e-06	0.000472342276853361	5.7639392715219
TGGT1_269417	-0.949345137478806	5.30969227349726	-9.65781214404642	1.62229634327989e-06	0.000547874530334229	5.70359810206952
TGGT1_232640	-0.948253010988042	5.16811617760718	-9.55110895405093	1.8014348736209e-06	0.00055729844317563	5.59429847371379
TGGT1_214240	0.581797678095832	7.48353131175705	9.4936099570608	1.90678844851994e-06	0.000564243573070726	5.52057953194913
TGGT1_244060	0.554886988563546	7.51088903105885	9.35097883013411	2.1981639097676e-06	0.000582418880491505	5.37545928110115
TGGT1_275755	-2.07261893460892	3.55263090243894	-9.95005413889847	1.22354151190837e-06	0.000496307601492871	5.36232739484521
TGGT1_311335	-1.03799205655466	8.30179959165482	-9.3306228446911	2.24355067094892e-06	0.000582418880491505	5.34058556321856
TGGT1_316330	0.624183420484811	8.36328124007746	9.32715404737355	2.25138586584016e-06	0.000582418880491505	5.33482661004599
TGGT1_266900	-0.584143562023945	7.16244660274954	-9.25504233461748	2.42118578531265e-06	0.000582418880491505	5.28613093933611
TGGT1_304730	-0.973942370796491	5.2852246275294	-9.20087307488424	2.55787499174541e-06	0.000582418880491505	5.26601013075481
TGGT1_309890	-0.891289112105871	6.49650107033553	-9.18994468146061	2.58645429812364e-06	0.000582418880491505	5.24231438823359
TGGT1_288400	0.648337828241224	6.94815122810146	9.1749367330254	2.62626857485022e-06	0.000582418880491505	5.20848048004079
TGGT1_272640	-0.586593659138538	7.30913340932473	-9.16507068243223	2.65280418678176e-06	0.000582418880491505	5.18945781808043
TGGT1_225780	0.748977185276769	5.83528037411377	8.93196871111551	3.37260561322842e-06	0.000717311056363519	4.99566670682447
TGGT1_250000	1.79495241855268	3.14029090566053	9.61575936882255	1.690473866738e-06	0.000547874530334229	4.9686858929469
TGGT1_249350	-0.579953101456809	6.85383761448364	-8.77330416034385	3.98262146636549e-06	0.000821385506063138	4.79052039225232
TGGT1_247195	0.507268923292472	9.8005917728471	8.695355399586	4.32530557684875e-06	0.000865824404589193	4.63827789887825
TGGT1_211280	-2.46068221716297	2.51601966223245	-9.87678612296238	1.31235926911446e-06	0.000496307601492871	4.55334684396937
TGGT1_244720	-0.625947218319551	5.91832997991694	-8.47946446798128	5.45285262693404e-06	0.00106034614225466	4.51468680481341
TGGT1_270980	0.791883650583232	5.87487207545879	8.348706329297	6.288138114492e-06	0.00115667751370899	4.37269816358779
TGGT1_310290	0.991319274070948	4.69597868138059	8.25598045200772	6.9641315019239e-06	0.00124731260531826	4.28326964001224
TGGT1_244715	1.43057825939052	4.24613153724126	7.98193747083812	9.46590812982225e-06	0.00161062426828926	3.94684325225573
TGGT1_200700	-1.13431514086385	3.60803781089555	-8.11766909023155	8.12305296130068e-06	0.0014175768834516	3.94410362081711
TGGT1_233838	0.708613903602381	6.10774397608153	7.94587776879363	9.86179000045369e-06	0.00163705714007531	3.90555928465553
TGGT1_265320	-1.79591433171437	2.81668558668062	-8.36606335712757	6.16968596936769e-06	0.00115667751370899	3.7960037365046
TGGT1_312100	0.554751404623636	8.41238229754852	7.84283666120134	1.10951420611378e-05	0.00175612876437451	3.69165126344638
TGGT1_245428	-0.671736189954743	6.22111659008545	-7.74179723292082	1.24680651994563e-05	0.00192858299426135	3.66316660808569
TGGT1_202160	0.585008310869969	6.16104401267043	7.71579245964757	1.28504233919404e-05	0.00194355514678992	3.63272611509232
TGGT1_256025	-0.737193693901493	5.13022236991289	-7.66005905473163	1.37132885007722e-05	0.00198580088375011	3.63193652707099
TGGT1_251958	1.24741326200546	3.02730159363433	7.88346917258716	1.05899282077952e-05	0.00171607265195842	3.53996950994568
TGGT1_244240	-0.78436946009552	5.90182439214961	-7.44968411409359	1.75806655991372e-05	0.00225762283146656	3.33871009625564
TGGT1_270040	1.44397186061012	3.50399944560285	7.51864402531556	1.61968177463556e-05	0.00221204284352274	3.32486997956701
TGGT1_215530	-0.60590857449745	8.90179211061408	-7.54634937112462	1.56743898774027e-05	0.00221204284352274	3.32169774249854
TGGT1_218610	0.707790948990487	6.85738402353907	7.48716662256924	1.68133059927748e-05	0.00221204284352274	3.31530882238301
TGGT1_237410	-0.786589356453463	5.86879629518772	-7.40859908773925	1.8465471137133e-05	0.00231452816513575	3.29165853357212
TGGT1_204395	1.29700352206367	3.17170345402605	7.48280501740412	1.69007093539792e-05	0.00221204284352274	3.20419173598918
TGGT1_237830	0.540963885969779	7.00201646942492	7.3978890606256	1.87039449136741e-05	0.00231452816513575	3.19711289792228
TGGT1_250720	0.664664836642682	7.78170981222732	7.32234099328694	2.04836262380734e-05	0.00245712697375669	3.07521785375855
TGGT1_304520	0.509429333074087	7.6247469076485	7.31255429797642	2.07272347616879e-05	0.00245712697375669	3.06775177974329
TGGT1_206550	0.683732432126467	4.80968662025171	7.152832026542	2.51783503667345e-05	0.00285606420993326	3.04418393799461
TGGT1_225110	-1.19232147597013	6.59899860999808	-7.24458277095434	2.25079556057529e-05	0.00259642620089414	3.04302201908719
TGGT1_217182	0.483893109903087	9.0440323735794	7.3041325595289	2.09393718010415e-05	0.00245712697375669	3.01689725037609
TGGT1_214295	1.54695624134565	2.54087829473274	7.49964365472667	1.65659609764418e-05	0.00221204284352274	2.97113685469728
TGGT1_220420	-1.67697823572413	2.28343680826061	-7.66147634979151	1.36905856811557e-05	0.00198580088375011	2.95139201274486
TGGT1_245435	0.761077018466765	4.44910009975181	6.9586352586293	3.20277166476518e-05	0.0035041294238152	2.81692532589221
TGGT1_217630	-0.759929052282151	5.18792365260342	-6.94851015377019	3.24361083897087e-05	0.0035041294238152	2.7768369516629
TGGT1_248800	0.586105897712207	6.12026439207565	6.98219368709419	3.10987918382487e-05	0.00346980946313313	2.73460229587308
TGGT1_299010	-0.633668422934348	5.52005962108582	-6.91057693831781	3.40167651048505e-05	0.00358498688865993	2.70056805922823
TGGT1_227630	-1.00681367682581	4.86591176223696	-6.79382762954219	3.94253701410151e-05	0.003708780029264	2.60603501606045
TGGT1_247420	0.447216959412298	7.09136063526069	6.90541854618456	3.42380469825001e-05	0.00358498688865993	2.56812211535476
TGGT1_315150	0.707935862345075	6.10994964135261	6.83375544133254	3.74780734551079e-05	0.003708780029264	2.54554972778559
TGGT1_254603	-0.823695030989297	4.34861536562213	-6.72527761894343	4.30274296646306e-05	0.003708780029264	2.53290407182791
TGGT1_222120	0.486420663274624	6.78077617199874	6.85913211042443	3.62944689637201e-05	0.003708780029264	2.52524240020542
TGGT1_261410	-0.652737366843828	4.7257999049943	-6.72606140815673	4.29842961144184e-05	0.003708780029264	2.52504235958368
TGGT1_314875	0.694454003859729	7.17407731981504	6.84122777479275	3.71252914157172e-05	0.003708780029264	2.48178874649772
TGGT1_258880	-1.29982307447855	3.38976481037596	-6.75191615901278	4.15872351571596e-05	0.003708780029264	2.4692556782025
TGGT1_234930	-0.587650051966307	5.73257123298938	-6.73614686821207	4.24334071602283e-05	0.003708780029264	2.45659630303075
TGGT1_256900	0.504212280551901	6.25778917675314	6.7435918693118	4.20316246167084e-05	0.003708780029264	2.41382449777144
TGGT1_215740	0.551384621679364	5.64968597550222	6.69759198530649	4.45813269335772e-05	0.003708780029264	2.40980494643174
TGGT1_214200	0.580746500826421	6.40903630661956	6.74447101630339	4.19844510227575e-05	0.003708780029264	2.40275026197962
TGGT1_275310	0.424793612007435	6.90073099828426	6.75542091540232	4.14016508344918e-05	0.003708780029264	2.38164940187487
TGGT1_215030	0.624354947024089	6.34717742558594	6.72343437321784	4.31290510993859e-05	0.003708780029264	2.3805439882104
TGGT1_226690	0.544629970642024	6.94675299753927	6.75447233235181	4.14517921379593e-05	0.003708780029264	2.37846118394998
TGGT1_204390	0.704775431907214	4.73978203640027	6.60774494837804	5.00546683207442e-05	0.00398707732132695	2.37262093972933
TGGT1_320410	0.723780046943654	4.38290340230796	6.55799348066846	5.33930642843974e-05	0.00408306961257987	2.3242761222546
TGGT1_261430	0.577060305740878	6.72718601482126	6.6957977162903	4.46840967381205e-05	0.003708780029264	2.31471338888557
TGGT1_236980	-0.642437403948668	7.27931305026375	-6.71216897347555	4.3755776126479e-05	0.003708780029264	2.3088058952592
TGGT1_242770	-1.50336896526281	2.96653783763205	-6.67847000332037	4.56897992423694e-05	0.00374656353787429	2.28605930024089
TGGT1_256020	-0.760655935767296	4.43007589280397	-6.51967847157803	5.61272034763695e-05	0.00424446385400189	2.27591645991658
TGGT1_269990	0.692494818070737	7.13638807863919	6.63609727279891	4.82532320997236e-05	0.00390966068655617	2.21218586286509
TGGT1_408250	1.48645906925814	2.79459498230206	6.60273649740853	5.03803481683982e-05	0.00398707732132695	2.17616211496383
TGGT1_233030	-0.399126253758541	7.87524582701975	-6.58228113252294	5.1734348534366e-05	0.00404717213936661	2.11095075176487
TGGT1_321360	0.60486401839492	4.88138895855005	6.36847556096875	6.84807763381378e-05	0.0050116146640577	2.05160739483456
TGGT1_217915	-2.03205288987185	1.88834860767875	-6.73719835049232	4.23764121313551e-05	0.003708780029264	2.00923833680854
TGGT1_319590	0.496085844130998	5.8783166222349	6.39754367795847	6.58960130835568e-05	0.00487487244615965	1.98839535341107
TGGT1_258230	-1.24726276420587	3.94013201554934	-6.21067364506356	8.45518917488116e-05	0.00599437682544179	1.88213555986568
TGGT1_278500	0.486899687447765	6.40682533568943	6.29826280762792	7.51845535269968e-05	0.00544368160962489	1.80248035729007
TGGT1_225430	-0.787571262969908	3.81378323461528	-6.14165476916881	9.28152269835383e-05	0.00615576588832939	1.79309570674979
TGGT1_215895	-0.617525215613224	4.83408405377824	-6.16309972156302	9.01585714468714e-05	0.00615576588832939	1.78611466922182
TGGT1_203890	-1.35719738213898	2.08329433947158	-6.43115119245136	6.30376404529958e-05	0.00471466132882516	1.75566482250177
TGGT1_271110	0.431447386982116	6.21817632387072	6.24431962763348	8.0813176229276e-05	0.00578962607806792	1.74521104021596
TGGT1_306070	-2.16397350907541	1.11856968756551	-6.56667707132798	5.27935424895303e-05	0.00408306961257987	1.74016410896603
TGGT1_233260	-0.829947704099866	5.28096539300088	-6.13892366304545	9.31595484128604e-05	0.00615576588832939	1.71154961143175
TGGT1_250500	0.59505343216692	5.76928946205294	6.14613434095316	9.22534230303406e-05	0.00615576588832939	1.65700885759711
TGGT1_273100	0.716253893473993	5.10532054535152	6.08560155883074	0.000100164107044117	0.0064312916277572	1.65017981483641
TGGT1_266280	0.459439957573099	6.65941632950915	6.19619937134435	8.62170146770898e-05	0.00604941239064199	1.63984844689405
TGGT1_219650	-0.70642604782727	6.37499052954328	-6.15180632546346	9.15473031402416e-05	0.00615576588832939	1.60896070731075
TGGT1_240410	-0.571037901131037	6.55438039229999	-6.15092364379126	9.16568082870455e-05	0.00615576588832939	1.58989692926012
TGGT1_310100	0.538117183512063	5.81365745955892	6.07170323653678	0.000102081241666632	0.00649313019423458	1.54793647142797
TGGT1_245440	-0.787656353094216	4.6816169573858	-5.95576756927359	0.000119694336982305	0.00708382310870931	1.5206538969828
TGGT1_315600	0.573920863508286	5.73924321278649	6.0069536257476	0.000111546399577417	0.00683950266237749	1.46600229408197
TGGT1_289320	0.372984046896585	7.4353977512392	6.09489068235469	9.89043202865267e-05	0.00641088384638191	1.45320155874968
TGGT1_231991	-0.917612027596357	3.85938217752184	-5.87106049960824	0.000134612413051915	0.00744855352220595	1.44359680577608
TGGT1_232040	-0.666302459397108	4.96454677460124	-5.92061659614984	0.000125657955433453	0.00719673329577416	1.44292285843531
TGGT1_207910	0.452448278037893	5.81330879310646	5.97323835428178	0.000116843786187373	0.00704778548357415	1.40905903793628
TGGT1_204540	0.396898679765861	7.25588007563173	6.04308682671988	0.000106153665247257	0.00668964671919286	1.38747194828616
TGGT1_292300	0.39219627250782	6.87871488061617	6.01283848249749	0.000110648452066207	0.00683950266237749	1.36544533193124
TGGT1_312220	0.497053716937294	5.63243121455256	5.91331435139669	0.000126936325477955	0.00719673329577416	1.34580453165038
TGGT1_231950	-0.451024621709057	6.70262147063841	-5.97218010924571	0.000117014363744326	0.00704778548357415	1.32393196740605
TGGT1_259620	-1.55425753297343	1.32602816208551	-6.12781963683908	9.45736578781398e-05	0.00618911841844827	1.3035166697723
TGGT1_223855	-0.705338963990291	5.78062725185346	-5.88669806611773	0.000131715165774973	0.00734797883823334	1.2991121330562
TGGT1_307850	-0.436528237857676	6.23534890577907	-5.92021087556814	0.000125728619926851	0.00719673329577416	1.29165056418989
TGGT1_210420	0.382467606074079	6.80906184813146	5.95689808905294	0.000119507642948577	0.00708382310870931	1.29039358956604
TGGT1_247330	0.43550205312474	6.83593659899967	5.91604118595592	0.000126457328533714	0.00719673329577416	1.23027719485299
TGGT1_254040	-1.27277712524031	1.65013866722109	-6.02641087027691	0.000108606907868359	0.00678145518304635	1.22649802640536
TGGT1_236250	0.518327699462924	6.13575887801723	5.82984851552168	0.000142579946007111	0.00782579929455158	1.16979276958973
TGGT1_300040	-0.344314497782237	8.04190629653483	-5.90759888896295	0.000127946624858753	0.00719673329577416	1.16356283854572
TGGT1_410890	1.12463194052619	2.35126714240002	5.75588618420226	0.000158173420555473	0.00828098692538885	1.12351692283446
TGGT1_242070	0.373709046368705	9.47022316295533	5.90842133095916	0.000127800715979394	0.00719673329577416	1.12035371616661
TGGT1_313590A	0.430157856939829	6.46068029940799	5.80813623672028	0.000146979403202944	0.00793427729313114	1.10548648196703
TGGT1_288860	0.410199967698906	6.50831317391307	5.80294019323897	0.000148053660920901	0.00793427729313114	1.09348093162802
TGGT1_240910	0.433911852444907	6.84658570603765	5.81573828193308	0.000145422723829414	0.00791797646706394	1.08475979434872
TGGT1_273120	0.771072455975925	6.303404550073	5.77981252105007	0.000152938196079947	0.00809907218607159	1.08276554204341
TGGT1_276960	0.904502201717657	3.56248531625658	5.58092413038307	0.000202805205593258	0.00967111354332471	1.05501376007942
TGGT1_312210	0.475509570309994	5.82579784377888	5.71864043693623	0.000166708295278946	0.0086453395643021	1.04369864376789
TGGT1_273200	0.391339500056972	6.78046260829555	5.77716287710275	0.000153508714664008	0.00809907218607159	1.03321882539571
TGGT1_313590B	0.548289339400539	5.64737837511299	5.67131007415732	0.000178271470914341	0.00905459426151497	0.99762088985529
TGGT1_252070	-0.591516151729028	4.82454150683112	-5.55502071458768	0.000210483996252283	0.00994829221175721	0.941754873358288
TGGT1_299015	-0.530713152847426	5.42078907182575	-5.60350000148294	0.000196356776802676	0.00951543185604983	0.933249471071944
TGGT1_255215	-0.587702304316287	5.76014881464285	-5.61471626051189	0.00019323483199902	0.00951543185604983	0.907234837967561
TGGT1_320440B	0.5142516613751	6.34083589990892	5.66014444944851	0.000181122504017441	0.00906411589957868	0.902056677449406
TGGT1_221870	0.414707585532087	7.89881263484776	5.71455789504894	0.000167673350350849	0.0086453395643021	0.887459821334482
TGGT1_223262	-0.993098410232351	2.6043757486925	-5.51257095970709	0.000223747208527705	0.0103593435458474	0.876141866609155
TGGT1_297510	0.455836758269877	5.60980546393961	5.57957199722834	0.000203198536099829	0.00967111354332471	0.867779609022703
TGGT1_273860	-0.416765905858524	7.94100381412024	-5.68861422586075	0.000173947430042578	0.0089014000666901	0.847570196099222
TGGT1_288640	-0.564100992493959	7.18051408227649	-5.66327435933205	0.000180318426694281	0.00906411589957868	0.844666304982624
TGGT1_233430	0.52446878010512	6.44608862260065	5.60074672330741	0.000197131338775055	0.00951543185604983	0.804178473526335
TGGT1_310530	0.490663734478101	6.83287701615149	5.60786488919052	0.000195135489150462	0.00951543185604983	0.781459503753803
TGGT1_212160	0.782702972152444	4.48955546323879	5.41420379493135	0.000258035613322258	0.011533837952089	0.774765954640409
TGGT1_311920	0.397942089796911	8.61660960398386	5.64435087361117	0.000185238791813171	0.00920244684000322	0.757415736654259
TGGT1_223725	0.675257299264417	4.65713018173963	5.39002670987227	0.00026729467829954	0.011736823100043	0.719557485091638
TGGT1_286220	-0.616792497420158	4.6493804646726	-5.38102592883048	0.000270831679769825	0.0118159000802143	0.711501098430032
TGGT1_224650	-0.438483994950229	5.77239826255401	-5.47637145002175	0.000235763184906442	0.0108419205167111	0.699243650656474
TGGT1_314358	0.607993262932336	4.3519375155466	5.33058798567708	0.000291598028960063	0.0121514321692099	0.667081917499111
TGGT1_239730	-0.841653590172537	3.56180457129427	-5.27478649672484	0.000316566495287738	0.0126738327466373	0.637131033803451
TGGT1_308960	-1.3275274429139	2.29384611469524	-5.3677686193502	0.00027613255903592	0.0119397015993455	0.634642911318267
TGGT1_253070	0.442117510365911	5.98350960071641	5.44774887165852	0.000245751499584847	0.0111505647078298	0.626318204625739
TGGT1_249570	-0.365348611715538	7.7524065031231	-5.53072104339389	0.00021797020146472	0.010222837396676	0.620154786165044
TGGT1_227330	-0.361317084894375	7.77122050047793	-5.52650798340821	0.000219296835132926	0.010222837396676	0.613089661279647
TGGT1_262630	-0.495461395527112	5.28755688688532	-5.32534761442347	0.000293850992872002	0.0121514321692099	0.541267328384694
TGGT1_243280A	0.440571379426094	5.7072120924577	5.3651862876495	0.000277177909593974	0.0119397015993455	0.537540784403187
TGGT1_235183	1.49400110810494	2.12942455988183	5.29598807852216	0.000306821374778755	0.0124299183139536	0.520226320691443
TGGT1_254950	0.510170323890113	5.77511265586735	5.35380602804213	0.000281835275618641	0.0119876977061948	0.51221691650876
TGGT1_266870	-0.49701298994106	5.78381970588398	-5.34960358992779	0.000283576157904402	0.0119876977061948	0.50964281966573
TGGT1_297925	-0.64171281865791	4.66918537314604	-5.24167271180252	0.000332452508807958	0.0130200858366197	0.505471173932757
TGGT1_228460	0.428007553585578	6.91248162822558	5.40642371317041	0.000260977232533309	0.011533837952089	0.474162626364491
TGGT1_224290	0.392086694417978	7.19250069226609	5.40799687453191	0.000260379553173915	0.011533837952089	0.459339601884698
TGGT1_246140	0.377215708952941	5.97939440620252	5.32437963042577	0.000294269179489606	0.0121514321692099	0.441330159114629
TGGT1_203300	0.511667837637627	10.1039181698885	5.45624189200742	0.000242741419595264	0.0110879067232575	0.436393475643847
TGGT1_236540	-0.406629366745893	8.40337421636132	-5.41688422813714	0.000257030361716901	0.011533837952089	0.424362554333552
TGGT1_301222	0.470801863034715	6.4265301487769	5.32363571761071	0.000294590994404882	0.0121514321692099	0.391012074822861
TGGT1_229360	-0.423955289810266	7.01487943135444	-5.3532678747532	0.000282057570852689	0.0119876977061948	0.389472837458567
TGGT1_207100	0.657045602643171	6.29426798661914	5.30598728927727	0.000302336726651916	0.0123215794107362	0.379626299805119
TGGT1_218490	0.500771137111746	6.47916106438739	5.31641522816541	0.000297734124392174	0.0122070991000791	0.374893138256496
TGGT1_273705	-2.10104826425764	1.08937721479471	-5.26003217087936	0.00032354249742902	0.0128025013808251	0.372707675179071
TGGT1_277510	-0.684586168727734	6.65216093667624	-5.28518267090154	0.000311747411057177	0.0125547507671902	0.318299213972172
TGGT1_268560	-0.389989639090476	6.4598462348179	-5.26903562418384	0.000319266320912597	0.012707172983223	0.30723239833806
TGGT1_268985	-1.1361321000346	1.93179069708262	-5.13896398167032	0.000387363519032159	0.0147284698912451	0.288566894634894
TGGT1_281545	0.488305631580908	5.24067787858999	5.12623073658878	0.000394816133697575	0.0149284366996983	0.243373936057755
TGGT1_299995	-1.36700831002552	2.121667969803	-5.04497687869461	0.000446112419322237	0.0162365835610008	0.203083753623777
TGGT1_229640	0.328005632325742	7.34240525715349	5.24083079994521	0.000332867313483959	0.0130200858366197	0.196878951328634
TGGT1_215360	-0.493629641945454	6.75781757436715	-5.21374656993511	0.000346510004654773	0.0133239948682508	0.196773145306791
TGGT1_205030	-0.44147146308583	5.29365282648124	-5.08469081789763	0.000420208118030249	0.0157630439316175	0.176325182935252
TGGT1_209970	0.380357393519419	7.4671642860937	5.22037551765005	0.000343116771921721	0.013268481532382	0.159993032101027
TGGT1_284780	-0.327179527139172	7.99938069702786	-5.22077407743752	0.000342913887558321	0.013268481532382	0.13966168720276
TGGT1_244070	0.589767564597955	4.36397293208591	4.97158996908045	0.000498551434824533	0.0174007234123886	0.136451105519905
TGGT1_277530	0.561303953215452	5.52546095919901	5.08261565997521	0.00042152130407793	0.0157630439316175	0.135190508241408
TGGT1_235478	0.376772921369372	7.25000487388773	5.18484173901946	0.000361728923080201	0.0138310508454149	0.115284790412082
TGGT1_220212	0.602072149953021	4.13572106330023	4.92979027170451	0.00053131312021391	0.0179015697830489	0.10045800346162
TGGT1_411170	0.615001141477142	4.77636980705288	4.98498339566826	0.000488513236292351	0.0172578874127948	0.0999596106549347
TGGT1_290910	0.391651314687954	6.29876674544211	5.05005673005291	0.0004427063345001	0.0161992436161703	-0.0160026089370051
TGGT1_297220	0.504850553193878	5.01246017364144	4.93055541142485	0.000530693304742046	0.0179015697830489	-0.0208932781252438
TGGT1_232980	0.414527862265231	5.56179809537593	4.98426619699425	0.000489045291273196	0.0172578874127948	-0.0232357340215588
TGGT1_213065	-0.789106549093596	3.17641290006231	-4.80165413303531	0.000646780054555033	0.0198287614923494	-0.0279869907030834
TGGT1_258760	-0.571768769573529	4.44655691065545	-4.86703900215277	0.000584856008580711	0.0187760848792468	-0.0284287092544417
TGGT1_245610	0.359146536671542	6.85434001140029	5.0653434774279	0.000432622148799478	0.0160023170909198	-0.0453991239954057
TGGT1_240755	0.517233305712508	5.33892252698285	4.94451433288786	0.000519519324328308	0.0179015697830489	-0.0501675489170017
TGGT1_213560	-0.765753943125657	2.97863373853029	-4.78248142052484	0.0006662281968473	0.0200634916271802	-0.0570690480439993
TGGT1_210260	1.42914505685763	3.56473437478869	4.77581186101271	0.000673138017560159	0.0201822790639403	-0.0741094796377428
TGGT1_268170	0.409680358113995	6.13703809711066	4.9728733765812	0.000497580115621727	0.0174007234123886	-0.117663575196342
TGGT1_211650	-0.380761462913209	6.49095444724605	-4.99224990230053	0.000483157104840601	0.0172578874127948	-0.123748732159886
TGGT1_270260	0.890331157849666	3.14861896067766	4.73376383630696	0.000718485823251158	0.0211688939958761	-0.125364753503695
TGGT1_220208	0.395461683298388	5.84167451398344	4.93665099004474	0.000525782794786259	0.0179015697830489	-0.13687038587028
TGGT1_308965	-0.756958696563424	3.00260388644858	-4.72304401240369	0.000730556918901426	0.0213033590420515	-0.140982708551385
TGGT1_239820	-0.292823783212569	9.72541702254995	-5.06726364711183	0.000431372840257707	0.0160023170909198	-0.154684114825079
TGGT1_289170	0.485872304416891	6.18833640436115	4.95175792123052	0.00051381957452576	0.0178421225725629	-0.156246855705257
TGGT1_304700	0.43280450097184	6.09620036699336	4.93997725444905	0.000523123563845518	0.0179015697830489	-0.164151535866795
TGGT1_312420	0.293194154104082	9.28172126887087	5.05368706815854	0.000440289101712747	0.0161978790608484	-0.16453176931297
TGGT1_265520	0.337114206766219	7.4748096082714	5.00342729259529	0.000475039681323252	0.0171221115194416	-0.177942701208627
TGGT1_318275	-1.15468016551183	2.87036762363957	-4.69718785362812	0.000760564294491451	0.0215683357846201	-0.181471278740825
TGGT1_265850	0.502812748080227	5.56159266159411	4.87361019417266	0.000578989844584239	0.0187330797037832	-0.194901929226316
TGGT1_271260	-0.387405212395697	7.53941162119943	-4.98380515770885	0.000489387638946429	0.0172578874127948	-0.210644782917215
TGGT1_213115	-0.513214280254867	5.05550495069394	-4.80865790189969	0.00063982646050217	0.0197537548745983	-0.210676446954207
TGGT1_295125	0.341724776808201	8.36610601740509	5.00282351290456	0.000475474445661836	0.0171221115194416	-0.214928006352195
TGGT1_264060	-0.336006315245811	6.5519273538019	-4.91609699155484	0.00054253649376995	0.0180122115931623	-0.249978734881894
TGGT1_310830	-1.12826071338971	1.17507280304978	-4.75000666338186	0.000700596228151277	0.020822087025317	-0.273075170095317
TGGT1_227800	0.351545718901786	7.32744118529524	4.9349019037797	0.000527186880323767	0.0179015697830489	-0.279164433434263
TGGT1_220190	0.481386518159654	4.98910960859919	4.75010880588529	0.000700485233933447	0.020822087025317	-0.297649637701679
TGGT1_299790	-0.4530468070662	6.04594828303209	-4.84803687295713	0.000602176804357879	0.0189811445657414	-0.29838307146679
TGGT1_225320	-0.487434355980726	6.43613912741869	-4.8752380647006	0.000577546295137995	0.0187330797037832	-0.300598275533451
TGGT1_201520	-0.309702214481588	6.91588393279755	-4.89972964047537	0.000556282611196756	0.0183789293776948	-0.307993098543227
TGGT1_202255	-0.847984788381294	2.46470040016917	-4.61832847947102	0.00086041330317	0.0229645997700981	-0.310136429478376
TGGT1_285810	0.374531702813547	5.74838861196987	4.81810664590569	0.000630570685957863	0.0196865325166478	-0.310369506785617
TGGT1_224830	-0.529035525357409	5.48711851105997	-4.78785249580033	0.000660718263551441	0.0199859933410271	-0.311676299536827
TGGT1_214600	0.444898824056132	7.55020683390261	4.91696044445038	0.000541821405044529	0.0180122115931623	-0.317223264165732
TGGT1_253100	-0.384712355160994	6.60146844077797	-4.87161538455637	0.000580764004921871	0.0187330797037832	-0.324507655238429
TGGT1_239910	0.331780873151576	8.40878448160189	4.92618119374818	0.000534247096628056	0.0179117524120717	-0.337625909573633
TGGT1_308850	-0.479699594684581	5.141426012921	-4.73630319552822	0.000715657416891357	0.0211688939958761	-0.338577356847761
TGGT1_262150	0.328722291481696	6.63757323213474	4.86311900635055	0.000588385413577549	0.0188007095061446	-0.344960803424281
TGGT1_271430	0.488655771777307	7.49784651432017	4.8861652984082	0.000567954611816302	0.0185841302308738	-0.363713661678199
TGGT1_218770	0.644865412279209	4.40125021911358	4.64316415234333	0.000827550741560362	0.0225296269837167	-0.369997746423852
TGGT1_217780	0.439057473878773	5.30812335086786	4.71526464992835	0.000739451217621586	0.0213033590420515	-0.405068750051261
TGGT1_301390	-0.306503874278953	7.21193568191349	-4.84779694832966	0.00060239894595947	0.0189811445657414	-0.409926647961206
TGGT1_306370	-0.690848372545193	4.91225541447462	-4.65879464690149	0.000807550974304527	0.0222995429647452	-0.417873412089101
TGGT1_237460	0.484088566690352	4.72538376818637	4.63806700449752	0.000834185424610141	0.0225296269837167	-0.43006016254184
TGGT1_225150	-0.301947072299395	9.40390043553402	-4.88728181879028	0.000566984113210258	0.0185841302308738	-0.43083335330465
TGGT1_309885	-0.508957280964753	4.87333861453869	-4.64916325867837	0.000819813432252128	0.0224985895964032	-0.430958108242346
TGGT1_263785	0.567854571747327	6.49889825478119	4.79615529343772	0.000652295603815251	0.0199081788321372	-0.436120936894458
TGGT1_258750	-0.615563480242267	4.41444793023323	-4.59688937343794	0.000889891036157106	0.0232946092003279	-0.439295372054798
TGGT1_240440	-0.41025299474217	5.1842653405374	-4.6720467460017	0.000790994833642708	0.0221093939268239	-0.448540369957589
TGGT1_208730	-0.906830761365487	5.19825808275727	-4.65742409213737	0.00080928403060418	0.0222995429647452	-0.460946948543167
TGGT1_203170	-0.347436663063546	8.25499387870586	-4.82683070406697	0.000622150738694306	0.0195131701730573	-0.488995447875396
TGGT1_200330	-0.384943876050818	7.53670974796984	-4.80703458487386	0.000641431064837824	0.0197537548745983	-0.490947942213188
TGGT1_270240	-0.444629137843021	9.70827228354921	-4.85406004146819	0.000596628433191455	0.0189750145621544	-0.491614720041301
TGGT1_250100	-0.761582568772836	7.92319931832225	-4.81249560611798	0.000636049886665856	0.0197537548745983	-0.498451331653273
TGGT1_252450	1.0752007553256	1.9803318293154	4.50592408346481	0.00102735384495101	0.025801366305301	-0.506075574455208
TGGT1_462962	-0.693178623656653	4.65685314492554	-4.56689164142518	0.00093293995013285	0.0240514746235007	-0.52152511619412
TGGT1_211860	-0.590559937805172	6.18704262066268	-4.71518913435139	0.000739538115631864	0.0213033590420515	-0.524824963334833
TGGT1_289570	0.320677600743356	7.87827890538059	4.789076488261	0.000659469394318007	0.0199859933410271	-0.534233710996004
TGGT1_268670	-1.03146411718921	1.89823973775749	-4.48052724373842	0.00106961156518389	0.0263760011327594	-0.553025084954217
TGGT1_300360	-0.383489061371013	5.24947405143375	-4.61034419236973	0.000871268882054785	0.0230715605621901	-0.55793846560783
TGGT1_216910	-0.530438998920842	6.37632488618921	-4.70593561075088	0.000750268659630712	0.0213653912027056	-0.562986063998663
TGGT1_241870	0.372538382531795	5.97877306779041	4.67750163996921	0.000784284564066631	0.0221093939268239	-0.565528538440552
TGGT1_222210	-0.353971978458353	5.58662683469826	-4.63832997096302	0.000833841763171368	0.0225296269837167	-0.567901030302597
TGGT1_217660	0.571934320941406	6.47232377717302	4.70977589372177	0.000745795534969626	0.0213272454243835	-0.571435754422674
TGGT1_214610	0.448077509728233	6.73815623113034	4.72572065326489	0.000727522904745681	0.0213033590420515	-0.572726884194457
TGGT1_221295	-0.513319177279737	5.30901796327601	-4.60569966295277	0.000877650172070971	0.0230715605621901	-0.572771257857035
TGGT1_219260A	0.450672476556829	4.81398592983087	4.54836369496697	0.000960623191576294	0.0246717035542198	-0.586799000416866
TGGT1_237270	-0.873646353172262	2.73209061599243	-4.41164725421278	0.00119371129028417	0.0287081238221698	-0.591513556022566
TGGT1_319570	0.291695331323531	6.93984423201073	4.71998109305503	0.000734045224904059	0.0213033590420515	-0.598851735254896
TGGT1_250940	-0.37206316347586	7.3771128554959	-4.7132006963997	0.000741830163527214	0.0213033590420515	-0.633843762995343
TGGT1_289190	0.425881387162546	5.41617601587708	4.5791336486944	0.000915111921265758	0.023681565536634	-0.639515735471222
TGGT1_265340	-0.471631173124911	4.73586183929009	-4.50213339693409	0.00103354766610413	0.0258614904981791	-0.641467668601859
TGGT1_290340	0.390795264785257	6.50949099132289	4.6649547939744	0.000799809838764898	0.0222183908678934	-0.648684171451445
TGGT1_290630	-0.389078886136621	6.03904610023254	-4.62323862766693	0.000853808441519738	0.0228780324920604	-0.656953397158144
TGGT1_200340	-0.761891208301371	3.13812066368857	-4.37060864341425	0.00127478509533213	0.0301256505514946	-0.657581330408742
TGGT1_232780	-0.297347549817448	6.85094483721993	-4.6746349253786	0.000787803477429706	0.0221093939268239	-0.662672318561493
TGGT1_243340	0.36871654121603	5.33301167543468	4.53698435216006	0.000978054276231577	0.0249453592819493	-0.693818411357656
TGGT1_244660	0.453518481919528	6.37702244773562	4.62734573589402	0.000848324946484959	0.0228209469793543	-0.694503425717427
TGGT1_268035	0.475303369345564	5.37724196325365	4.5366259244662	0.000978608717055605	0.0249453592819493	-0.700987701290162
TGGT1_216770	0.269068787295717	7.57870788771093	4.6707186979354	0.00079263769000074	0.0221093939268239	-0.712777887743927
TGGT1_210975	0.401142118418602	6.02622602553615	4.58678128127893	0.00090415758739575	0.0235084318277393	-0.717559443684769
TGGT1_233842	0.720066559026092	3.04447171849786	4.32009075727894	0.00138261940391982	0.0318986700443332	-0.730669623320439
TGGT1_287960	-1.0280561459066	2.40545046536264	-4.28682895574385	0.00145882638230642	0.0329324906186541	-0.779721095867068
TGGT1_254835	0.426476301919693	4.96414000392505	4.44081825364092	0.00113939662896819	0.0277947435726076	-0.78482109434769
TGGT1_263850	0.333625008398482	8.15916101615281	4.64045588173262	0.000831068976920799	0.0225296269837167	-0.78584025949607
TGGT1_256780	0.479671270076605	5.90550424747416	4.52225370867892	0.00100111628057213	0.0254238709163205	-0.804909587525183
TGGT1_318610	-0.961834575579338	2.0642033210401	-4.27638250778051	0.00148366191540611	0.0329886459130921	-0.813643868583102
TGGT1_239855	0.861475907441412	2.53657266962607	4.24946220450285	0.00154973258385816	0.0336980190598678	-0.828823487133701
TGGT1_311240	-0.280840533610179	8.24392100865094	-4.61173944236759	0.000869361487941093	0.0230715605621901	-0.835578316167701
TGGT1_205390	-0.458792147253363	4.76526842970686	-4.38157430891556	0.00125256957641099	0.0298076522274586	-0.839269959864623
TGGT1_235750	0.350612712428997	5.51266858438555	4.46317878296479	0.00109952882013853	0.0269186803951901	-0.84270948785146
TGGT1_217020	-0.536131455702097	8.20010516432548	-4.60546032772548	0.000877980338760983	0.0230715605621901	-0.843505403828117
TGGT1_262900	-0.732803721442677	4.68290736654622	-4.3659243328492	0.00128440121180614	0.0301435677501814	-0.843956990076074
TGGT1_271740	0.275340356209656	7.77347087719376	4.58621247399844	0.000904967549054908	0.0235084318277393	-0.857731361148999
TGGT1_212110	0.539902209342099	3.91788447762963	4.26544707042857	0.00151013659372228	0.0330804301577491	-0.894581416616753
TGGT1_224070	-0.356052922139338	6.21190101384703	-4.48487559173351	0.00106224825730146	0.0263760011327594	-0.90366524232672
TGGT1_273030	-0.343703701469253	6.07130379339837	-4.47087281218998	0.00108615308192818	0.026687212547304	-0.908744023604923
TGGT1_261790	-0.612680781007099	5.69531010755872	-4.43256423104861	0.00115449575664823	0.0280624932848137	-0.910894906402621
TGGT1_271120	-0.343521780932982	6.59666948473389	-4.50623554066306	0.00102684668112996	0.025801366305301	-0.912151109218232
TGGT1_315780	-0.306542522535858	6.96671995256071	-4.51919419457367	0.00100597777694108	0.0254523596649108	-0.923953226628433
TGGT1_217688	0.441532353708833	4.49601095262637	4.28346811670125	0.0014667684599013	0.0329324906186541	-0.955424216124642
TGGT1_283890	0.532509990311471	4.43795518230693	4.27425114607244	0.00148878340647498	0.0329886459130921	-0.959778962926739
TGGT1_216370	-0.463486209178588	5.03423281641291	-4.33388980701499	0.00135224352582628	0.0315183884821017	-0.963745750110006
TGGT1_297330	0.475857650533955	5.56481221207828	4.385689766829	0.00124433753224746	0.0297156534893902	-0.976274963829065
TGGT1_312370	-0.536233960500649	4.76886058619441	-4.28681459488627	0.00145886022245208	0.0329324906186541	-0.99096083918923
TGGT1_314970	0.312800354267212	7.18805279076892	4.48240448319471	0.00106642614556825	0.0263760011327594	-1.00057402431149
TGGT1_301000	1.20173056085603	1.47033365303828	4.17057509409407	0.00176175067518075	0.036295650393315	-1.00447568793772
TGGT1_229310	0.335167559019033	5.88576986766723	4.39102822220758	0.00123374394940348	0.0295664130973241	-1.01719247320799
TGGT1_278470	0.326655731641748	6.25732867238892	4.41269362430897	0.00119171655994659	0.0287081238221698	-1.03043384398693
TGGT1_310480	-1.52311908268512	1.81989453198873	-4.13265030506788	0.00187431130262526	0.0374092748553299	-1.03159904686839
TGGT1_215500	-0.627465006392361	4.16737806018752	-4.19372603248719	0.0016965437729088	0.0354192543509734	-1.03918107843627
TGGT1_251430	-0.921168860582652	1.44802187553213	-4.1436883958521	0.00184079267798278	0.0369645395709327	-1.04196951700498
TGGT1_233920	0.42958254266281	4.87755973030291	4.26948380475959	0.00150030631978532	0.0330455819173427	-1.04636706246103
TGGT1_224730	-0.42675378417005	5.55395972835113	-4.32875253254016	0.00136346936258663	0.0316715784360567	-1.06251443390777
TGGT1_279540	-0.619049755503962	5.18228897526548	-4.27966234407712	0.0014758168731545	0.0329324906186541	-1.0744566803813
TGGT1_226560	-0.305770945093935	6.12948461422524	-4.36643992073244	0.00128333906514958	0.0301435677501814	-1.0878270967904
TGGT1_272320	0.335866350189899	6.88068299457825	4.41423744875439	0.00118877992591685	0.0287081238221698	-1.0917165434995
TGGT1_235470	0.249356557601212	10.434467988989	4.49186986297738	0.00105051640265934	0.0261897972032947	-1.09552798847402
TGGT1_312820	-0.589921613303232	4.59350110477645	-4.19823214992926	0.00168414899187799	0.0352686708883742	-1.1028627226159
TGGT1_207665	-0.707239222492775	3.36177569646533	-4.08836261929985	0.00201536397074221	0.0389675204115666	-1.10322584260499
TGGT1_202572	0.37190865190091	5.58313794230338	4.30943227481907	0.00140657288569539	0.0322008897277703	-1.10486090615797
TGGT1_289960	0.697708206350089	4.31602304068825	4.14536789533735	0.00183574799420701	0.0369645395709327	-1.14536554542151
TGGT1_219738	-0.292203016867989	6.90308208266397	-4.37736979633271	0.00126103899669525	0.0299046390644875	-1.15209192511756
TGGT1_289580	-0.307126627947005	6.50212787046688	-4.35181187222739	0.0013138360645357	0.0307284132482129	-1.15632148889917
TGGT1_241140	0.521689369313351	5.25008850350159	4.24063813139846	0.00157205647353941	0.0340486262188397	-1.15986354223447
TGGT1_212190	-0.326568594296225	6.1512358474875	-4.32367577927363	0.00137465930076223	0.031822895241455	-1.16077625683124
TGGT1_208320	-0.676649457681235	4.58310212278007	-4.14356414727638	0.00184116645820543	0.0369645395709327	-1.18766900688055
TGGT1_312430	0.460884577444925	6.17885315755128	4.30796139647733	0.00140991259754269	0.0322008897277703	-1.19238051307662
TGGT1_291350	0.317255383025991	5.86344019443812	4.28134937331617	0.00147179865912537	0.0329324906186541	-1.19442415674225
TGGT1_242790A	-0.565565685608045	5.43926182305817	-4.23128271937735	0.00159609384978776	0.0343766289292896	-1.20067511991799
TGGT1_247310	1.03751758370168	1.89687587654608	3.99146076203182	0.00236416174684235	0.0437241436114376	-1.2221391974667
TGGT1_311260	-0.351914942007326	5.68935419708062	-4.23914701299237	0.00157586207154489	0.0340486262188397	-1.23325120272963
TGGT1_262990	0.437790505928155	5.00793268398872	4.16520409442423	0.00177725106514549	0.0364336468354825	-1.24081665047182
TGGT1_246700	-0.657717355137888	2.97112198417201	-3.98051906933893	0.00240733626857344	0.0442819747132725	-1.24094259505683
TGGT1_277850	0.306978651489983	6.04155537915916	4.2619315810183	0.00151875266795823	0.0331302264683452	-1.25153324324443
TGGT1_213388	0.301964055143573	6.19768411134385	4.27255417895942	0.00149287436691631	0.0329886459130921	-1.25426601969743
TGGT1_240860	-0.387680452087997	5.68926277768417	-4.21059738702197	0.00165062225621567	0.0351066721118871	-1.27977979082773
TGGT1_254840	-0.916314700653929	2.64114084362727	-3.94077769400473	0.00257120689646426	0.0469159092153773	-1.28601023463282
TGGT1_201240	-0.462163421955647	4.03966759082712	-4.02358499058901	0.00224201747751717	0.0421524059447013	-1.29529415104893
TGGT1_262740	0.305318650525441	5.77369345439634	4.20633710664149	0.00166209364562797	0.0352095265452343	-1.30535502473485
TGGT1_265030	-0.592502310618304	3.86947768178069	-3.99852356245473	0.00233672323017392	0.0434610335272063	-1.30758441687239
TGGT1_202120	0.285580694820715	7.94190180324117	4.31488533242577	0.00139426382808903	0.0320586473445066	-1.31140127847105
TGGT1_232475	-0.878085455888478	2.5580750352014	-3.92202414151752	0.0026525407682347	0.0476337532153177	-1.31234920874461
TGGT1_409790	0.8897485506962	2.11264888084037	3.91509492747398	0.00268326800918814	0.0479326038596706	-1.32315595570883
TGGT1_250955	0.374955397706408	7.00397952355916	4.2648446397961	0.00151160942977666	0.0330804301577491	-1.34818334047961
TGGT1_290670	-0.249334944139897	8.47799421279877	-4.30121510115868	0.00142533761980305	0.03244430715846	-1.35656652931523
TGGT1_314885	0.964203065693163	2.29158691654087	3.88833536581669	0.00280546145449147	0.0492112645857447	-1.36031832724989
TGGT1_267130	-0.662867549835388	2.72377448531267	-3.88879892747685	0.00280329599411195	0.0492112645857447	-1.36839555658331
TGGT1_214400	-0.31063619395243	5.87599083794173	-4.17364137647655	0.00175296520845023	0.036295650393315	-1.37147861287301
TGGT1_248440	-0.450513811698982	6.30058292375992	-4.20187068217984	0.00167421000088728	0.0352686708883742	-1.3798490834332
TGGT1_213930	0.409987390084058	5.22912557925792	4.10226537899208	0.00196992462134729	0.0383796848250375	-1.38530073599915
TGGT1_318525	-0.54280051525716	5.43306804157083	-4.11539159576527	0.00192800762049337	0.0380348401886316	-1.39156294048502
TGGT1_231990	-0.549541659511651	4.38598740825875	-3.99840941930267	0.00233716401277659	0.0434610335272063	-1.39291549806755
TGGT1_208800	-0.356568131743287	6.44174083765096	-4.19901250192835	0.00168201218337165	0.0352686708883742	-1.40260345991442
TGGT1_232750	0.280670350333822	6.71404828822841	4.21681449164604	0.00163403076468382	0.034862737882251	-1.40488488030684
TGGT1_269330	0.326646961856248	6.53954546586821	4.20496544700961	0.00166580481157294	0.0352095265452343	-1.40682964625745
TGGT1_299780	0.320152267491112	9.6238194623092	4.283729264386	0.00146614971012242	0.0329324906186541	-1.42268462612304
TGGT1_266300	-0.292036042782226	7.16502573516334	-4.22358305628113	0.00161616650639815	0.0345900290646095	-1.42621909554859
TGGT1_226290	-0.375751042042516	5.67114063166604	-4.11574118897753	0.00192690409632806	0.0380348401886316	-1.434680261462
TGGT1_316230	0.293549107597193	6.15798860380123	4.16046242980319	0.00179105411443262	0.036606349257743	-1.43565878856041
TGGT1_269430	0.358610807658386	6.19446537589174	4.15560209111077	0.00180531935807998	0.0366776225405741	-1.44821546156779
TGGT1_204510	-0.403518980297332	6.62450148704123	-4.17887912452586	0.00173806422913646	0.0361751227630053	-1.45513433336808
TGGT1_308040	0.330216935117392	6.26838285449198	4.1557723028127	0.00180481777353851	0.0366776225405741	-1.45739246160249
TGGT1_294960	0.302127998004653	6.03796461018478	4.12824638727423	0.00188786236765776	0.03756956512947	-1.47352422099598
TGGT1_268950	-0.271476719755513	6.84781216054974	-4.17242710198543	0.00175643882095365	0.036295650393315	-1.4886467522962
TGGT1_217030	0.49236710382891	5.40319438378589	4.05256433824567	0.00213748983519619	0.0410871997813945	-1.49864073962755
TGGT1_226910	0.426026749957168	6.89870238607129	4.16938024225646	0.00176518664122646	0.036295650393315	-1.49950098272163
TGGT1_201260	-0.302266487415657	9.19158221657366	-4.22642203109093	0.00160873475808028	0.0345395860047142	-1.50581184185112
TGGT1_239795	-0.407970869964254	5.01626978466155	-4.00044936719702	0.00232929950341999	0.0434610335272063	-1.5095025985721
TGGT1_288010	-0.30960357689012	6.03967705043936	-4.10087960665605	0.00197440529970835	0.0383796848250375	-1.51642999431481
TGGT1_208790	-0.275239452695613	6.66805437985415	-4.13405472720867	0.00187001129999014	0.0374092748553299	-1.53626080928117
TGGT1_267450	-0.365840661692279	7.14982087093123	-4.14843702866205	0.0018265666999633	0.0369645395709327	-1.55052665295829
TGGT1_462969	0.380325327515365	4.6732522065372	3.92982314301654	0.00261839523526838	0.0472700211438636	-1.56623674682906
TGGT1_225680	-0.435490893291725	4.51343002119213	-3.9078813827979	0.00271565088457193	0.0481320831260328	-1.56667534237702
TGGT1_230705	-0.754215224250002	5.28962361959699	-3.98451927461785	0.00239145720521579	0.044109099562869	-1.57716819845517
TGGT1_306350	-0.379428683398799	6.62256570099721	-4.1028514555691	0.00196803284041399	0.0383796848250375	-1.58278589212461
TGGT1_408680	-0.327241300637181	6.87752334061779	-4.11031624402896	0.00194410325101258	0.0382415223306117	-1.59478942049441
TGGT1_262840	0.388569085459208	7.05132401954928	4.11852856829302	0.00191812910859703	0.0380348401886316	-1.59633452926948
TGGT1_217555	-0.256648105764698	6.88724102851699	-4.10763856865252	0.00195265172176394	0.0382989844908513	-1.60085705058457
TGGT1_229340	0.297447877414721	6.34541996123488	4.05057999085023	0.00214448204987277	0.0410871997813945	-1.64343365539971
TGGT1_292100	-0.405560224748383	6.00239225792921	-4.01219106234848	0.00228456700108516	0.0428340578770953	-1.65871795114082
TGGT1_212950	-0.429573366803872	5.13891149698217	-3.92429380087152	0.00264255608919234	0.0475799913837119	-1.65953897038926
TGGT1_320670	0.406473447113276	6.40243836768129	4.03928830752234	0.00218472857289927	0.0414185589614273	-1.66887469103352
TGGT1_248370	-0.278545054438049	6.6921431179242	-4.04602082410511	0.00216063793560697	0.0411913215398908	-1.68673397491516
TGGT1_295105	-0.300836168072832	6.66749682600405	-4.02951711224227	0.00222019338823456	0.0419199463556326	-1.71185101750695
TGGT1_280700	0.256903425459154	7.05216379555601	4.04338457804756	0.0021700378113574	0.0412549646483197	-1.72352351961005
TGGT1_313180	-0.248496518497033	9.55553783410174	-4.09936259421694	0.0019793225644414	0.0383796848250375	-1.73051016026984
TGGT1_294780	-0.311922138158825	5.4345540676956	-3.91326153552256	0.00269146005980606	0.0479401740575968	-1.73479374260279
TGGT1_224480	0.269709414911491	7.20165775971566	4.02861603236763	0.00222349406911304	0.0419199463556326	-1.75790978140938
TGGT1_249530	0.285578292598143	8.48499810352251	4.0617784574634	0.00210533338561403	0.0405917819333968	-1.75951870747323
TGGT1_210380	-0.342932867946118	8.05470724279403	-4.04926200139871	0.00214913945374323	0.0410871997813945	-1.76201831641141
TGGT1_219430	0.337034044202227	5.72945777314855	3.90126871768534	0.00274569449786319	0.0485381733830048	-1.80914709902745
TGGT1_281580	0.26706318805786	6.33523161276069	3.93680671693417	0.00258820905903293	0.0470998685983373	-1.83449843759362
TGGT1_263420	-0.324947212136124	6.19791491783428	-3.91651572496037	0.00267693742600495	0.0479326038596706	-1.848324868944
TGGT1_266970	-0.28461981003509	7.68159484477894	-3.97588548338586	0.00242586737378123	0.044502569665647	-1.87044826846404
TGGT1_207480	0.280082327750433	6.73138946816043	3.93155173514157	0.00261088941831516	0.0472598760134388	-1.88706524325788
TGGT1_254370	0.288498831437807	9.15313179317087	3.99269639855553	0.00235933718596138	0.0437241436114376	-1.8997029967128
TGGT1_295100	-0.415094537430581	7.78776157401047	-3.93488360014793	0.00259648522763445	0.0471244758914134	-1.94485438685097
TGGT1_221180	0.332434992824042	8.89699648536786	3.95373899427648	0.00251651850107442	0.0460414648341733	-1.95765891210906
TGGT1_312622	0.267737113651947	6.7956107350661	3.88879638835121	0.00280330785051753	0.0492112645857447	-1.96577048239164
TGGT1_297180	0.221276692952092	8.26740632181042	3.91185122952824	0.00269777940994116	0.0479401740575968	-2.00545597376793
