# Supplementary material for: A serine–arginine-rich (SR) splicing factor modulates alternative splicing of over a thousand genes in Toxoplasma gondii
Source: Oxford University Press journal article supplement (doi:10.1093/nar/gkv311), 2015-04-13
Supplement: gkv311_Supplementary_Data.zip [file gkv311_Supplementary_Data.zip › nar-03398-a-2014-File015.txt]

	logFC	AveExpr	t	P.Value	adj.P.Val	B
TGGT1_215970	1.96690871382894	7.82266518113268	27.2156847638925	4.28090747982304e-10	2.9439800738743e-06	13.7472564205595
TGGT1_208740	1.77415630689858	5.80228532906059	18.4362594310797	1.44158457362637e-08	4.95688855641428e-05	10.3899174019627
TGGT1_315900	1.69204548669512	6.60306292436555	16.7204078750095	3.45281797301482e-08	7.91500973347432e-05	9.61340655398104
TGGT1_215530	-1.2037066840902	8.60284608310588	-15.3311989222598	7.46806731379419e-08	0.000128394747292407	8.83438215168211
TGGT1_309400	1.35209115894596	7.44433382785129	14.6155930411705	1.14028332784996e-07	0.000156834568912483	8.41600638132288
TGGT1_250720	1.35500314615502	8.12698250203877	14.0401836774875	1.62536886860183e-07	0.000186294361822913	8.04323844777875
TGGT1_320300	1.09174931285406	8.55841143355962	13.5729721372941	2.1891392714237e-07	0.000215067296708297	7.7293071875164
TGGT1_271145	1.00731714143406	6.46391510986993	12.9030760997536	3.41171435995741e-07	0.000251544346296841	7.3191190504089
TGGT1_311335	-1.03067746074951	8.30477206819607	-12.8007090150861	3.65776277878204e-07	0.000251544346296841	7.20135823643001
TGGT1_275755	-1.70225521295948	3.73640885709353	-12.9529386350213	3.29852707425955e-07	0.000251544346296841	7.11921645352808
TGGT1_278630	2.04222252091291	5.6434345247586	12.1814941014517	5.63560257877875e-07	0.000305374757384598	6.84819813980137
TGGT1_244715	2.12007512356913	4.59460331008307	12.1697936642308	5.6828902135411e-07	0.000305374757384598	6.80514009410455
TGGT1_269417	-1.08265880645596	5.23949615418664	-11.8607843233318	7.10483658303559e-07	0.000305374757384598	6.62162918149056
TGGT1_270040	2.10381432861609	3.83783454226547	11.900249430632	6.90308401165832e-07	0.000305374757384598	6.50172721396032
TGGT1_316330	0.796175242736313	8.44905418129623	11.7085372857496	7.94634408647711e-07	0.000309844899442353	6.38713398741029
TGGT1_250000	2.1884946449583	3.33754771063854	11.9059738762157	6.8743478313371e-07	0.000305374757384598	6.35577769896828
TGGT1_257390	1.02971848906852	6.8092941159701	11.589932773821	8.67817080261987e-07	0.000309844899442353	6.3426859704315
TGGT1_203980	0.808985987553343	8.78809308833207	11.6272872691844	8.43996631993875e-07	0.000309844899442353	6.3161117105153
TGGT1_222410	1.25658120579676	6.81951370829944	11.5395832286241	9.01104840605943e-07	0.000309844899442353	6.30576172432738
TGGT1_218500	1.89707968613278	3.63656158011929	11.3719091908562	1.02252056601263e-06	0.000334851139641373	6.12008269014209
TGGT1_295105	-1.22050793856184	6.20817812329086	-11.1775577389116	1.18631783491208e-06	0.000354709032638711	6.05686816003599
TGGT1_271260	-0.913673287556302	7.27618964486207	-11.2409842033447	1.12988580649514e-06	0.000353192031421232	6.04975182674669
TGGT1_206550	1.54473110664241	5.24036927855588	11.0134533788958	1.34727832840052e-06	0.000370609322576415	5.98236775271231
TGGT1_204395	1.74915989279721	3.401997121271	11.088462821561	1.27090154747742e-06	0.000364166247583427	5.8792639080749
TGGT1_251958	1.61285866084702	3.21044784905917	10.8095243550177	1.58173073839616e-06	0.000402872677331496	5.64513809108522
TGGT1_270980	0.911622648102018	5.9338595176775	10.4844061972739	2.05403062397129e-06	0.000504484592894663	5.49943702369323
TGGT1_278430	3.17408686330461	0.505025251137247	11.9966749583149	6.43620206786298e-07	0.000305374757384598	5.29364224042537
TGGT1_224480	0.859120060104458	7.49638810420762	10.265345072875	2.45915367674072e-06	0.000563719994498198	5.22340040026389
TGGT1_214295	2.19554660686409	2.8691922929518	10.3221390769745	2.34628453504485e-06	0.000556393060258739	5.18075829539983
TGGT1_209040	1.59524853919734	5.86823264161391	10.0247504364384	3.00821937732637e-06	0.00057709272042521	5.12069171891693
TGGT1_225780	0.809516008643897	5.86609737156754	10.0197455601432	3.02098850302568e-06	0.00057709272042521	5.10347960363959
TGGT1_219650	-0.717032202771207	6.36781268866008	-10.0282725303064	2.99926892378247e-06	0.00057709272042521	5.07334367746888
TGGT1_213920	-0.730290507990577	7.23711810320391	-10.0366434837629	2.97811372025004e-06	0.00057709272042521	5.03129322519738
TGGT1_272640	-0.817049824958645	7.19366888616035	-10.0242780432352	3.00942207049395e-06	0.00057709272042521	5.02314882605709
TGGT1_203300	1.16129329598698	10.4286380274998	10.1041817285989	2.81331277617472e-06	0.00057709272042521	5.01363265853765
TGGT1_236250	0.90644622616949	6.32966747540429	9.8811850006046	3.39929905853943e-06	0.000621085460690797	4.94340359392448
TGGT1_266300	-0.782096920168114	6.91953522466268	-9.8700433703464	3.43191035426062e-06	0.000621085460690797	4.89848618306233
TGGT1_235010	2.96390918374556	0.977654402236009	10.9401904436344	1.42678455549992e-06	0.000377384514929729	4.88547934541658
TGGT1_214200	0.864245022356399	6.55060801691339	9.79422735520365	3.66317403988088e-06	0.000629791196806521	4.8485754898146
TGGT1_273860	-0.898687796711377	7.69942873118501	-9.74431359212516	3.82475956604342e-06	0.00064153345208977	4.75064846031725
TGGT1_309890	-0.733099638252819	6.57439184522781	-9.55206197070124	4.52450490202318e-06	0.000723605121191009	4.62759150779878
TGGT1_275670	-0.753967630455133	7.57725495014079	-9.57252851688964	4.4437035652106e-06	0.000723605121191009	4.59557077937921
TGGT1_261430	0.860064983936274	6.86836811158171	9.52548801041176	4.63183733564127e-06	0.000723935121754659	4.58193786662033
TGGT1_204390	1.14822583585761	4.96101237954566	9.27758713694781	5.77957409650718e-06	0.000799910823068887	4.51860843176238
TGGT1_265320	-1.88408370606859	2.77501653001095	-9.4016605197586	5.17027895807288e-06	0.000790133519881493	4.48356142686201
TGGT1_245435	0.995521781325365	4.56732891085376	9.18400821356642	6.29131286390245e-06	0.0008320261262511	4.46024529736354
TGGT1_218510	2.76162049883381	1.92927365709594	9.81842082250741	3.5875659750468e-06	0.000629791196806521	4.44784270045155
TGGT1_253070	0.835000554044673	6.18090533521859	9.2989105394922	5.66947618947462e-06	0.000799910823068887	4.41846782337592
TGGT1_218610	0.904546522267283	6.95549419308978	9.32929757664132	5.51654157511865e-06	0.000799910823068887	4.39314058433551
TGGT1_306350	-0.828748420558788	6.3982329979828	-9.2829038273074	5.75190461217326e-06	0.000799910823068887	4.38917639640295
TGGT1_247310	2.31187739911344	2.53547780744533	9.27066057078857	5.8158413775548e-06	0.000799910823068887	4.31706576024381
TGGT1_232640	-1.00257013253677	5.13922533824994	-8.85981079352032	8.48821825997013e-06	0.00105212699049484	4.11088025904995
TGGT1_214240	0.770513063227353	7.57794905273008	8.98303074610696	7.56706289616994e-06	0.000981862104470956	4.03069620767431
TGGT1_239855	1.67737154997918	2.94262769973429	8.76599856354085	9.27209365081932e-06	0.00108074894977431	4.0222575319279
TGGT1_258575	5.16992077212439	1.13912994450112	9.19158826164619	6.24806101217047e-06	0.0008320261262511	4.00985787578365
TGGT1_304650	0.775583671852155	7.18905222521898	8.92729603242755	7.96936667839688e-06	0.00101491360458028	3.99026322735271
TGGT1_315150	0.86720254943941	6.1904332466038	8.84989135718269	8.56756019597365e-06	0.00105212699049484	3.98384198864983
TGGT1_250500	0.836449651223266	5.88963000020278	8.78918285280649	9.07123945868994e-06	0.00107556747857605	3.95341280190537
TGGT1_272680	1.66290610687118	3.95884423206584	8.5518254268816	1.13765717692466e-05	0.00116771170234491	3.89911271951181
TGGT1_203290	0.714552413297373	6.92321414053108	8.7982540870554	8.99395564854039e-06	0.00107556747857605	3.87494652994616
TGGT1_202160	0.705197713256676	6.2211565949453	8.72487096441248	9.64051290090327e-06	0.00110496345365853	3.85487314013057
TGGT1_270260	1.64941486895025	3.53066565032768	8.49320720183732	1.20402334579715e-05	0.00118321847645223	3.83696277244493
TGGT1_276960	1.76696333299517	3.99286633791873	8.42782493712317	1.28309795898282e-05	0.0012087485840993	3.78079270707623
TGGT1_263785	0.715934761539446	6.57331487486709	8.65125499171759	1.0340727738682e-05	0.00112878070887168	3.75050092026269
TGGT1_320440B	0.593642253013669	6.38086604885224	8.60895926659286	1.07681421976629e-05	0.00114482470201219	3.72269266760799
TGGT1_212275	2.86735240092227	2.77587431712588	8.49290083225132	1.20438117422795e-05	0.00118321847645223	3.71681456472299
TGGT1_205640	-0.552960611873897	7.15789309310312	-8.60389066236176	1.08206493573931e-05	0.00114482470201219	3.66727082938211
TGGT1_264980	-0.733887805395065	5.84636684184561	-8.46673494236759	1.23537660819145e-05	0.00118702761871774	3.63737010623655
TGGT1_204540	0.685772794055395	7.40019207704367	8.57927497046092	1.10796763995219e-05	0.00115446870605321	3.63129455322978
TGGT1_315600	0.827124768177273	5.8658943929971	8.46059148327583	1.24278011556896e-05	0.00118702761871774	3.62500917912369
TGGT1_231770	4.89382955257914	0.434680069281685	8.68592027728551	1.00042860051668e-05	0.00111194935040659	3.56770405540495
TGGT1_201400	0.832354958123648	7.83736291463466	8.49979358381521	1.19635881879445e-05	0.00118321847645223	3.53496695742281
TGGT1_223725	0.79009862345626	4.71096721532304	8.22096547121533	1.57323025330134e-05	0.00131408444304304	3.51292370134473
TGGT1_261410	-0.843912430107973	4.63029266136806	-8.1697329571972	1.6557288619095e-05	0.00135552945039901	3.47573527043952
TGGT1_294210	3.34108090849628	0.480624661826392	8.68376551538011	1.00248450960024e-05	0.00111194935040659	3.47318799354052
TGGT1_312210	0.654802953535559	5.91581923220653	8.28006770783515	1.48361102871798e-05	0.00129154433132374	3.43090183860567
TGGT1_252395	1.84883336014836	1.86858814761909	8.32302113882963	1.42199245178436e-05	0.00129154433132374	3.41006176786503
TGGT1_235183	2.75285102295188	2.76410060676988	8.10840144571997	1.76078011262237e-05	0.00139182584304644	3.38341804156724
TGGT1_233838	0.675124370818776	6.09113384271432	8.21470699333866	1.58306231772881e-05	0.00131408444304304	3.34413730908357
TGGT1_288400	0.683216269690386	6.96562898054664	8.28031392638372	1.48324958525476e-05	0.00129154433132374	3.34109524985705
TGGT1_256900	0.609356193437325	6.31011391197186	8.21399862002985	1.5841794068364e-05	0.00131408444304304	3.32105428158991
TGGT1_278500	0.635790746477695	6.48103201331578	8.2128472544	1.58599692849459e-05	0.00131408444304304	3.30428723415907
TGGT1_310100	0.652570084710316	5.87191825565445	8.15421641946231	1.68164131696903e-05	0.00136054674550541	3.30378802186966
TGGT1_293430	-0.609009618417287	8.40867684552662	-8.28115875952678	1.4820101221185e-05	0.00129154433132374	3.28811666118293
TGGT1_294600	3.88389585665127	0.674721495453563	8.34089601429967	1.39718146994515e-05	0.00129154433132374	3.28109435575252
TGGT1_262990	0.957875108828249	5.26978854419427	8.01172679731642	1.94150035078029e-05	0.00147338058963797	3.23002144779411
TGGT1_278522	2.34446933060767	1.25843952694501	8.28002738112287	1.48367023665225e-05	0.00129154433132374	3.21319819181797
TGGT1_312220	0.677998698861008	5.72353307823087	8.04419083235559	1.87864312639766e-05	0.00145162121126255	3.20467383859326
TGGT1_313930	0.680653658008857	7.36741102185304	8.13240035726832	1.71882842956961e-05	0.00137446315234304	3.16522604244806
TGGT1_210260	2.3894187236945	4.05177685079355	7.79013718953565	2.43730342545671e-05	0.00162342832163581	3.15145579617749
TGGT1_221818	1.48507065521498	6.09696088987925	8.00245728582375	1.95986817687226e-05	0.00147338058963797	3.13356809489875
TGGT1_316610	0.947837868491509	5.74529733036638	7.97168305631715	2.02222606675465e-05	0.00149536007108298	3.12888209410791
TGGT1_409260	-0.889798912186131	4.6900689334369	-7.78574127847629	2.44844703429546e-05	0.00162342832163581	3.06894786720824
TGGT1_409120	1.96930045429515	2.62610589746174	7.73756231187715	2.57430308789391e-05	0.00167013984296664	3.04671031163802
TGGT1_271040	3.45099175556081	1.1855300108442	7.99684690599443	1.97107771189026e-05	0.00147338058963797	3.03913777923708
TGGT1_220340	2.49535124560235	0.714761492628702	8.08968249772018	1.79428088307175e-05	0.00140218973100959	3.00869019132246
TGGT1_264600	-0.725773629583176	6.75034367484569	-7.90987294577988	2.15413996499751e-05	0.00152721861229772	2.9640032667755
TGGT1_295420	-0.60891704825402	7.64844980423993	-7.95095549749823	2.06544950952567e-05	0.00150629165236051	2.95949745582858
TGGT1_253100	-0.680992403725884	6.45283914184617	-7.87888407399436	2.22379827709804e-05	0.00154475361127305	2.953149479902
TGGT1_266280	0.565776600486382	6.71289753166241	7.89066815361692	2.19702304762503e-05	0.00154172729576707	2.93876969417226
TGGT1_310560	0.683209270407796	7.38546310832046	7.91951375287025	2.13295882360618e-05	0.00152721861229772	2.93460242260062
TGGT1_307020	-0.752752519924764	5.25168490745983	-7.71566428867326	2.63383197863102e-05	0.00167711689972644	2.91639333945031
TGGT1_201260	-0.542813374412034	9.07087907843754	-7.94370085879136	2.08081586410133e-05	0.00150629165236051	2.90479485851192
TGGT1_293540	-0.670364829398173	7.06675406266924	-7.86883826057379	2.24690608444357e-05	0.00154519731427184	2.89686649127791
TGGT1_219170	-0.586355967644631	6.19483100872643	-7.80424417293344	2.40191552402108e-05	0.00162342832163581	2.89501561371762
TGGT1_228350	0.742431433512021	6.15915741893711	7.78313114195376	2.45509008943034e-05	0.00162342832163581	2.87384422513724
TGGT1_215740	0.706246483535504	5.72743461080726	7.70309616845545	2.66867701588148e-05	0.00168371484754284	2.83513961414677
TGGT1_236060	-0.807609271916719	6.73528807926246	-7.71857168691584	2.6258423261114e-05	0.00167711689972644	2.75628353143694
TGGT1_215960	1.77034826903713	2.3685563224158	7.462245129732	3.44399580515555e-05	0.00194134091410285	2.75514551862437
TGGT1_309885	-1.01960755249118	4.61552178833461	-7.47854611085704	3.38440218583982e-05	0.00192351519272896	2.74857310617662
TGGT1_233490	0.899112188208638	7.86569038482754	7.75475299675133	2.52860218373815e-05	0.00165611402072069	2.73606692560838
TGGT1_258570	4.77829519916044	1.36087145888975	7.51584471048975	3.25224157678759e-05	0.00188723222131986	2.68463317219111
TGGT1_301000	2.38835239725206	2.05019986520931	7.44425321701679	3.51110603761316e-05	0.0019630793675338	2.67026180311319
TGGT1_297330	0.924054599408435	5.78876621315232	7.54705539278992	3.14598376013044e-05	0.00188723222131986	2.65765362317978
TGGT1_289320	0.494624315965109	7.49599458010023	7.65903817006206	2.79486813737653e-05	0.00174730074370349	2.64199412115466
TGGT1_314875	0.778335178521777	7.2161000074955	7.63197623070574	2.87560631315912e-05	0.00178158059599958	2.62410091928707
TGGT1_297065	2.8243841454997	1.23929782114311	7.52387355774854	3.22453722788948e-05	0.00188723222131986	2.62026889037488
TGGT1_320410	0.955212241538738	4.49773307830542	7.3394722450535	3.93147879082002e-05	0.00207975228034379	2.60088644117631
TGGT1_313445	0.737601769066162	5.77922703147881	7.49480767031446	3.32607408733582e-05	0.00190611762488404	2.59683535430175
TGGT1_292300	0.475765748176809	6.92024449342343	7.58797507342997	3.01238193647992e-05	0.00184965630153325	2.58786186606528
TGGT1_312410	0.923222964378738	4.87211404143363	7.3464210218474	3.90196141140348e-05	0.00207975228034379	2.55681053986433
TGGT1_259710	-0.539981633473515	6.81397339632528	-7.52832887954327	3.20927509039764e-05	0.00188723222131986	2.53222928714963
TGGT1_253890	0.624304119817526	7.3402993134818	7.52524712129492	3.21982350797447e-05	0.00188723222131986	2.49710163386273
TGGT1_226040	-0.704389813900432	5.27444233546193	-7.34108774446092	3.92459468526454e-05	0.00207975228034379	2.49510079919966
TGGT1_278510	-0.629563563300423	8.3480734861165	-7.54480322029825	3.15352288428883e-05	0.00188723222131986	2.48371973772815
TGGT1_230970	-0.693466428462514	6.07398135495381	-7.38514085440852	3.74185671009602e-05	0.00205861988762643	2.44095192454416
TGGT1_306370	-0.935432929447919	4.79073477407623	-7.22127344162129	4.47281890551444e-05	0.00226173350097227	2.43471903777197
TGGT1_273100	1.00215365347418	5.24738654461558	7.27176987923592	4.23218522667672e-05	0.00217949975159686	2.41926863758333
TGGT1_270240	-0.832860735171672	9.51384725937171	-7.51197783304288	3.26567739329741e-05	0.00188723222131986	2.41168112935422
TGGT1_263410	1.12383019969449	3.6776014039368	7.07289063530092	5.27070513021916e-05	0.00249917840076305	2.39086957995329
TGGT1_319700	2.67683294579859	1.89927451588795	7.17733040887135	4.69441087708997e-05	0.00233965329889786	2.38119022798226
TGGT1_261560	1.13116270328472	4.61565700339455	7.13857547629898	4.89981089452733e-05	0.00242079787371615	2.36149435410264
TGGT1_300040	-0.49505504514824	7.96646990956475	-7.42217486163917	3.59541899669768e-05	0.00199400777744274	2.35671155583602
TGGT1_275310	0.51003481540107	6.94318844023027	7.37509263342979	3.78270417089042e-05	0.00206457591930266	2.34420780665838
TGGT1_315780	-0.520203305025799	6.85956068239667	-7.3623089385163	3.83537756520125e-05	0.0020768418516448	2.33888385230322
TGGT1_249770	0.533568544306486	6.24562217682945	7.31469209294359	4.0387442150836e-05	0.00212018656237633	2.33521193895391
TGGT1_225190	1.24122442218139	6.31389816229084	7.30387344459562	4.08657387961888e-05	0.00212904307349538	2.32567368944035
TGGT1_216830	0.879977806384007	4.26807144645352	7.04243087502995	5.45300630871908e-05	0.0025409506440308	2.29343637326273
TGGT1_310290	1.18073857779055	4.79063173715247	7.07204911690067	5.27565131094584e-05	0.00249917840076305	2.26157226809498
TGGT1_208810	1.75940519562434	1.6317812684946	7.0669378753335	5.30580262485685e-05	0.00249917840076305	2.25556121000186
TGGT1_202205	2.77322316395605	0.819910014269593	7.1333604946944	4.92819110542768e-05	0.00242079787371615	2.23651730618329
TGGT1_280810	-1.18055350882264	3.75125706629239	-6.91924287474144	6.26368908429848e-05	0.00272629049574181	2.21732413288431
TGGT1_269990	0.496864556563513	7.03870563134742	7.26861285281403	4.24680771723105e-05	0.00217949975159686	2.21522228466939
TGGT1_291860	0.830196305213868	6.016798301446	7.17722503332433	4.69495645263785e-05	0.00233965329889786	2.20460021137498
TGGT1_233030	-0.54079205016245	7.80410006508181	-7.24732071006707	4.34688011696116e-05	0.00221433293069199	2.15972696399128
TGGT1_306900	0.985398509741203	5.69999619205903	7.10026098823024	5.11255814905068e-05	0.00247060237584358	2.15823365497787
TGGT1_309090	-0.71637861537668	5.83780308506298	-7.10579126549651	5.08123723642732e-05	0.00247060237584358	2.14744458468358
TGGT1_268660	-1.69341792606296	1.61261307405212	-6.92930773113274	6.19275060740954e-05	0.00272629049574181	2.11288346288488
TGGT1_311260	-0.836362294093512	5.4457862620136	-7.02233993090649	5.57701088167646e-05	0.0025740338143147	2.10525569152547
TGGT1_219720	0.566930725065461	5.5917195168819	7.03991265352305	5.46838294774696e-05	0.0025409506440308	2.09438620538869
TGGT1_213065	-1.06041160844652	3.03672250173672	-6.77982240869344	7.34312429424947e-05	0.00292922604802824	2.0919407532675
TGGT1_309160	-0.962786160060734	5.27688328404805	-6.97942284414709	5.85233565518489e-05	0.00259654918069074	2.08292029724228
TGGT1_215180	2.18746066367029	2.79950416002231	6.76871777794523	7.43743966845964e-05	0.00292922604802824	2.07509302071908
TGGT1_232420	2.261736177584	2.18085710633348	6.76133635332327	7.50086268351746e-05	0.00292922604802824	2.02230698433646
TGGT1_289340	-1.1493779195784	4.77365982284527	-6.85720951045329	6.72095601737994e-05	0.00286959828689901	2.02204694437905
TGGT1_242770	-1.50174459172784	2.96659270003763	-6.71382761462232	7.92344551163244e-05	0.00299982742530646	2.01914349212244
TGGT1_202572	0.719357438579024	5.75712618353202	6.9838793921748	5.82306711795766e-05	0.00259654918069074	2.00789631111862
TGGT1_304520	0.593081277291145	7.66620035730687	7.09590821589922	5.13735843748193e-05	0.00247060237584358	1.98644314687405
TGGT1_318275	-1.43328052072341	2.72773371748172	-6.66874209153555	8.34855740195815e-05	0.0030538845347482	1.96608988030945
TGGT1_273120	1.0611475416032	6.44900657037699	7.00382490109167	5.69401684281358e-05	0.00259654918069074	1.95627993945647
TGGT1_311710	2.00785894418112	1.67034894528075	6.7572139277575	7.53653991192412e-05	0.00292922604802824	1.95437424550939
TGGT1_254960	1.2046544527748	4.52543393804846	6.76731709149348	7.44942963665653e-05	0.00292922604802824	1.94436035515362
TGGT1_310235	-0.776363010012794	6.36869928483221	-6.97988749565616	5.84927655840382e-05	0.00259654918069074	1.93611015619925
TGGT1_231950	-0.87276047596183	6.49044855090966	-6.98133233388248	5.83977540884753e-05	0.00259654918069074	1.92813600529664
TGGT1_278930	-0.74639338981831	6.85059278117451	-6.99074362231659	5.77829798265068e-05	0.00259654918069074	1.90717488881276
TGGT1_362420	-0.585717500842067	5.34388205165365	-6.84675055571112	6.80157802478609e-05	0.00286959828689901	1.9053604913091
TGGT1_265850	0.659198681003787	5.64215283096352	6.8789710417443	6.55652815190696e-05	0.00283580151576504	1.89720306488883
TGGT1_212110	0.891690351767226	4.09290640931775	6.68189488539232	8.22202840294495e-05	0.0030538845347482	1.89698132441837
TGGT1_252450	1.3465089618482	2.10965605580081	6.62522877567664	8.78250167497688e-05	0.00313182867376318	1.88631287217959
TGGT1_313590B	0.571353471481913	5.66001446469689	6.86693967658712	6.64688671679482e-05	0.00285691499696237	1.87909364560735
TGGT1_271120	-0.839941304929299	6.34932038776636	-6.92285407647907	6.23813540853714e-05	0.00272629049574181	1.87104725938188
TGGT1_208850	-1.24478064261399	5.28792905265015	-6.76408190228831	7.47720366732468e-05	0.00292922604802824	1.83410558932495
TGGT1_205150	0.899406717462651	5.41428286236079	6.78990452715553	7.25862175157314e-05	0.00292922604802824	1.82629734725999
TGGT1_213340	1.39933463885002	4.22468652032062	6.61332345759559	8.90546699574914e-05	0.00314066136050086	1.80806990417704
TGGT1_357490	-0.852836964703858	4.72901628146709	-6.6748203844582	8.2898229575758e-05	0.0030538845347482	1.80169326922053
TGGT1_227300	1.06077482230165	5.07154605245805	6.71212631515264	7.93905178720046e-05	0.00299982742530646	1.78870188385967
TGGT1_304700	0.521111750542475	6.14122003109832	6.83378184381754	6.90301384516252e-05	0.00289437048170716	1.77771227421956
TGGT1_269430	0.666623217454448	6.34812806669185	6.84842915818909	6.78856792785937e-05	0.00286959828689901	1.77369147595553
TGGT1_201785	1.18600768951014	4.55940218141202	6.62930194371889	8.74085706790354e-05	0.00313182867376318	1.77289939530883
TGGT1_308040	0.562720487133723	6.38507369097387	6.82854144007375	6.94446894694897e-05	0.00289437048170716	1.7448119480413
TGGT1_246140	0.673681506385744	6.12801985140173	6.80349857239142	7.14635792586896e-05	0.00292922604802824	1.74395009592691
TGGT1_240860	-0.604469890881823	5.57917439689186	-6.72102858016632	7.85775914420531e-05	0.00299982742530646	1.72001443216999
TGGT1_322000	-0.546093727173699	6.18959958102084	-6.76559843257948	7.46417026060216e-05	0.00292922604802824	1.69267400194817
TGGT1_313000	1.84312172528137	1.04306067676571	6.56112863542459	9.46713864204378e-05	0.00320725961101785	1.67808005823924
TGGT1_231750	0.607699180060526	5.91357005899387	6.72229918055518	7.84623057909269e-05	0.00299982742530646	1.67026288706603
TGGT1_207100	0.97494164813022	6.45258547099111	6.7569036829113	7.53923237605058e-05	0.00292922604802824	1.65551862039834
TGGT1_241140	0.926973282878974	5.45356875136396	6.6495516850114	8.53698861880366e-05	0.00308994056481646	1.65019421220261
TGGT1_219175	-0.714041257314106	4.29800550093515	-6.49585383190447	0.000102244798364868	0.00336429415480957	1.64762235466172
TGGT1_284780	-0.445705143268572	7.93980672440758	-6.7973710324704	7.19672500550885e-05	0.00292922604802824	1.61624568686397
TGGT1_283855	1.74245144472104	1.38569997716328	6.45669474794875	0.000107102932851979	0.00344180780010775	1.61189059541201
TGGT1_291830	1.78148196286414	3.11747968612145	6.35875820324471	0.00012038850249019	0.00367960769611129	1.61131083167665
TGGT1_215030	0.757006267732962	6.4138261301363	6.72024790877805	7.86485157927591e-05	0.00299982742530646	1.61124287977663
TGGT1_237460	0.853596555721601	4.90993428133567	6.54586637461176	9.63858003537614e-05	0.00323339097089179	1.60747883688876
TGGT1_240470	1.37213072228572	4.21436881641676	6.44414230714448	0.000108712927054681	0.00347729674118625	1.60427881434345
TGGT1_216030A	-0.573667930258411	5.21226977680582	-6.58203415379286	9.23767221607072e-05	0.00318932870299951	1.60359203983512
TGGT1_299010	-0.628464035051443	5.52277071005013	-6.59262114903567	9.12378143047742e-05	0.00316997906950509	1.57102002845968
TGGT1_211650	-0.53098220648937	6.41575012003322	-6.68404247221431	8.20156788103708e-05	0.0030538845347482	1.56800302796315
TGGT1_271110	0.597520622226052	6.30160711929549	6.66948944419241	8.34131136427814e-05	0.0030538845347482	1.55926899977324
TGGT1_249530	0.456714549697346	8.57053301491763	6.76831213896314	7.44090979988278e-05	0.00292922604802824	1.55690288804582
TGGT1_209300	1.93626883687624	2.47937807239602	6.30638029554616	0.000128221175445436	0.00383381314581855	1.55356000092894
TGGT1_297410	1.2316195988958	3.52688098248138	6.3154474233921	0.000126826535964459	0.00380867287260955	1.52716021125121
TGGT1_200330	-0.629720195727193	7.41390094741443	-6.70016285218223	8.04974482071393e-05	0.00302503252087703	1.51713446890518
TGGT1_203740	-0.602217113594642	5.26879499231925	-6.5184997599387	9.9545145712576e-05	0.00330711095200669	1.5166223643534
TGGT1_201520	-0.501967891943991	6.81907958331174	-6.65801542592989	8.45331791337211e-05	0.00307584483017249	1.49966238691517
TGGT1_266910	0.63570690048757	6.3629208644556	6.62456191347513	8.78934032334293e-05	0.00313182867376318	1.49723115685809
TGGT1_231420	1.64730279362508	2.50315820530877	6.24599845169964	0.00013794478560892	0.00398590878417035	1.48649472469396
TGGT1_316270	-0.563571970257443	6.12807507405769	-6.57265758044087	9.33983507130802e-05	0.00319552466593957	1.46224763170956
TGGT1_357600	-0.836626916915153	4.44167945477899	-6.3544416199038	0.000121013922551544	0.00368235728047332	1.45516729098868
TGGT1_315123	-0.787263331719068	4.51481543667817	-6.36224165336531	0.000119886355873584	0.00367960769611129	1.4515046078661
TGGT1_207590	-0.631925401551906	5.49252532172733	-6.4793098159379	0.000104267378878307	0.00339198746079793	1.43448226162874
TGGT1_227610	0.499952505146378	7.133037606402	6.61678273499068	8.86954536181207e-05	0.00314066136050086	1.42477009397488
TGGT1_217915	-1.68375634778432	2.06032690565224	-6.20277403840119	0.000145396728736014	0.00413179051040319	1.41566465455958
TGGT1_220212	0.704507276856678	4.18478665475733	6.2710632570664	0.000133814467087693	0.00394953686764834	1.38186352741742
TGGT1_228160	1.37296659485446	4.53443128633218	6.30003606549136	0.000129206909193951	0.00384656240054893	1.37875376463674
TGGT1_290340	0.609716919444295	6.61840540013699	6.54924936126755	9.60028934105381e-05	0.00323339097089179	1.37761137684678
TGGT1_240410	-0.577016552458368	6.55015841269713	-6.53716860370295	9.73779203604307e-05	0.00325081533164409	1.37305032089229
TGGT1_245610	0.52390588004945	6.93708815913034	6.56110435184587	9.46740876889085e-05	0.00320725961101785	1.3667220262149
TGGT1_221870	0.510114869207043	7.94661318736296	6.59233078093226	9.12688462646513e-05	0.00316997906950509	1.36223137159822
TGGT1_295100	-0.692497506142065	7.64851870265674	-6.57856308513122	9.27534885269597e-05	0.00318932870299951	1.35623163135135
TGGT1_411430	-0.686589551667916	8.69761340139635	-6.60449492286995	8.9978639265132e-05	0.0031570566440118	1.35036411803125
TGGT1_214575	0.697111349437942	5.10235078687843	6.36476858925529	0.000119523518323275	0.00367960769611129	1.34760013262406
TGGT1_227370	2.07558343623293	2.77658372282947	6.12057608060093	0.000160803186544242	0.00440575105125398	1.34111780705883
TGGT1_216370	-0.750900077547731	4.88872002074831	-6.2858499421491	0.000131441011590616	0.00389620619270977	1.29217284228421
TGGT1_262010	-0.610346654338673	6.55383634096509	-6.46026745993679	0.000106649448023896	0.00344180780010775	1.27650172465652
TGGT1_262510	0.649277044062962	5.67709611395471	6.37006713165722	0.000118766582736066	0.00367960769611129	1.26424606214528
TGGT1_201775	2.36484000973466	1.06291689102561	6.13373843105901	0.000158221326510693	0.00435235224965613	1.25982749996704
TGGT1_208760	1.45766535167653	2.25357043025979	6.03901124519599	0.000177858570491243	0.00469983232113342	1.24225171630855
TGGT1_233430	0.735622469407263	6.55184744706331	6.43444945987323	0.000109974162212505	0.00350135330340461	1.24060951365865
TGGT1_235515	1.13159945539379	3.67284598856975	6.08650025775093	0.000167702307112413	0.00455682628036542	1.22941759637363
TGGT1_293440	-0.676140556961182	7.9910542838272	-6.47860305820555	0.000104354747495217	0.00339198746079793	1.2172115500252
TGGT1_217182	0.528504709842951	9.06601761499001	6.50692497370955	0.000100915168064571	0.00333650774413489	1.21451515715562
TGGT1_223480	0.515890038981519	5.94725932759979	6.36131544308859	0.000120019648349249	0.00367960769611129	1.21435986695206
TGGT1_207610	1.67878825390239	1.84140987015374	6.03361492047473	0.000179054248674852	0.00469983232113342	1.21362126913166
TGGT1_278518	1.71029994925918	2.13630633063549	6.01136292156283	0.000184077638906752	0.00473906427787936	1.20513774165383
TGGT1_205030	-0.565892855084199	5.22949955684598	-6.25753144232231	0.000136027358796563	0.00398590878417035	1.19387283509495
TGGT1_277510	-0.917271383873293	6.53414699365239	-6.38169653422054	0.000117123451232804	0.00367960769611129	1.18492368673422
TGGT1_308090	-0.596312342962217	9.87775196861939	-6.47689568839699	0.000104566139550554	0.00339198746079793	1.15631083352581
TGGT1_221922	1.19200733228266	6.84857314142265	6.37653401973681	0.0001178497968862	0.00367960769611129	1.15088367677719
TGGT1_269680	1.97788023548888	1.29401581700982	6.02466245741557	0.000181057153819314	0.00473433477876586	1.15064872293407
TGGT1_310380	0.733796455174857	5.50418069233844	6.24764126973555	0.000137669872611647	0.00398590878417035	1.13497077447676
TGGT1_240910	0.560408232653266	6.90978347211476	6.37416427158183	0.000118184850451081	0.00367960769611129	1.13246003610141
TGGT1_249840	0.547145053489531	5.52485456559332	6.24888290136841	0.000137462490137523	0.00398590878417035	1.13074205954688
TGGT1_215570	-0.645277461670187	6.86148693049233	-6.33346733936163	0.000124103549380432	0.00374324609249664	1.0898255513916
TGGT1_293550	-0.441548431616747	7.19016719070344	-6.34975545251272	0.000121696893158297	0.00368682614206877	1.08561213168546
TGGT1_319590	0.591262293096596	5.92546979868031	6.25611414878257	0.000136261423373904	0.00398590878417035	1.08351414144504
TGGT1_205160	1.36219832383647	5.33907217191182	6.16111182433165	0.000152994893746103	0.00425969993640465	1.06562575800318
TGGT1_224460	-0.409486680785913	10.2569629796751	-6.40347928133201	0.000114111875176979	0.00361634730687598	1.05501534271111
TGGT1_202850	0.95486335818209	5.26021694005314	6.15067079772405	0.00015496595369903	0.00427992314694067	1.05326468339166
TGGT1_207970	0.684384662359516	4.1808710714749	6.00872326166077	0.000184683615889439	0.00473906427787936	1.05070411767009
TGGT1_249980	0.70519293820058	4.09177083696195	5.96874957932752	0.000194129722121519	0.00489022014296587	1.01420320119139
TGGT1_296015	-0.878868073975783	3.87620690394431	-5.91357040051578	0.000208040276984876	0.00513514725844858	0.985238144548051
TGGT1_220208	0.534799189174563	5.91141025333287	6.17145758158202	0.000151068648804544	0.00422316706434493	0.975337879842613
TGGT1_220190	0.543712097344796	5.02076701122062	6.05065165578588	0.00017530877361114	0.00469104449853621	0.957153703009384
TGGT1_205670	-0.460551353737503	6.30157723526314	-6.1883447476578	0.000147980834231064	0.0041707549057665	0.951802844224128
TGGT1_277150	-0.633281173687149	5.04906476573035	-6.03571939846157	0.000178586919398931	0.00469983232113342	0.940240926080843
TGGT1_247370	-0.485745862669221	6.08766162076039	-6.15774422468393	0.000153627638892743	0.00426006964784432	0.937802600982325
TGGT1_229340	0.533738025275812	6.46402786607738	6.19210715542981	0.00014730225981186	0.00416871457088957	0.936444451106077
TGGT1_258550	1.38410220436515	1.92865989962162	5.77073102838646	0.000249328595376413	0.00581231440814777	0.917478554312519
TGGT1_219260B	0.535933032482553	7.1953257387926	6.21769033365231	0.000142776851449272	0.00409115169756935	0.913967944380054
TGGT1_267500	-0.510258290059082	8.19726400221465	-6.23807450239018	0.00013927920262762	0.00400762793502152	0.901198257953743
TGGT1_297510	0.511065558658729	5.63695778955897	6.08359575670775	0.000168305056741721	0.00455682628036542	0.899456049219143
TGGT1_286410	0.526217982161291	7.44808897033022	6.20616922999579	0.000144795843668501	0.00413178845190158	0.88801509226052
TGGT1_321570	-0.788203330540856	6.90841042667247	-6.174773888934	0.00015045678359339	0.00422316706434493	0.88391096647651
TGGT1_278145	1.98701299034149	1.24816602635128	5.77904463040937	0.000246696623407477	0.00577051931691572	0.877290246244333
TGGT1_249230	2.29295700767423	3.195073220835	5.74984979965785	0.000256074395591983	0.00588131161220472	0.872472752700676
TGGT1_288950	-0.430924409584788	6.3154282707169	-6.11519175259776	0.000161872502916006	0.00441744921648165	0.854552109252648
TGGT1_216710	1.29392731554044	2.60933679994421	5.68924399077488	0.000276797888319458	0.00611543780842446	0.819076968568739
TGGT1_262630	-0.702606948677606	5.18114076232134	-5.9486401638012	0.000199078804453466	0.00499453975515857	0.804951708144655
TGGT1_287170	-0.477957046420062	6.18339760538826	-6.06123408446686	0.000173025128269066	0.00464802268400925	0.79968724938388
TGGT1_243280A	0.665172007208312	5.81894467305495	6.02126052873062	0.000181824619705842	0.00473639359741317	0.793566455165271
TGGT1_234930	-0.721668406935216	5.6645697733871	-5.99451123586274	0.000187983636123142	0.00478888934411154	0.788886382557582
TGGT1_216640	1.08838878705196	2.71579205700415	5.65139144303219	0.000290657616957276	0.00628569947111693	0.766007569417948
TGGT1_266035	1.14430465512192	3.46227350685078	5.68742029638036	0.00027744897429525	0.00611543780842446	0.747366217117827
TGGT1_205370	-0.586846458606957	6.25176506914619	-6.01552882120964	0.000183125673350349	0.00473906427787936	0.732887566179191
TGGT1_266970	-0.687976270372744	7.47932146571674	-6.06293261812602	0.000172661608192056	0.00464802268400925	0.700067698188657
TGGT1_285210	0.757951485031373	6.00592093514849	5.94316544078477	0.000200449756059876	0.00499453975515857	0.665928853558736
TGGT1_363480	1.46305740338562	2.60478461904502	5.56038937705694	0.000327148433613306	0.00667596373281514	0.658522616909663
TGGT1_258720	-0.785092489511324	4.90000939760773	-5.79515919219239	0.00024168027537956	0.00569190155405902	0.654278681408741
TGGT1_226850	0.461121546805264	6.66229274423888	5.99144524196517	0.000188703913881549	0.00478888934411154	0.652573557421429
TGGT1_315450	1.85419423267613	1.24771243861787	5.57602151509821	0.000320543126069127	0.00659992538316583	0.645501668833346
TGGT1_261580	1.05283802390355	2.36019804470193	5.5418651167825	0.000335166931493848	0.00672726349718307	0.64212334205514
TGGT1_318220	3.05741926386322	0.585530063987642	5.57706283639051	0.000320108271876021	0.00659992538316583	0.640797406506786
TGGT1_217020	-0.58318079567663	8.17586018690916	-6.03733221248205	0.000178229667040197	0.00469983232113342	0.638640237248797
TGGT1_294808	3.22269982057048	1.15981119887333	5.55582018732971	0.000329106816602009	0.00669521654070588	0.634848796309531
TGGT1_249350	-0.550563348455419	6.86758241409415	-5.98589580565717	0.000190015239408247	0.00480417206400924	0.633769007909388
TGGT1_200700	-1.54281574453932	3.40395162916786	-5.58258685992147	0.000317812091426437	0.00658636366609487	0.630831123450029
TGGT1_277530	0.729121841819871	5.60937548326949	5.87243276137423	0.000219113554807211	0.00534341814329499	0.628132075016711
TGGT1_291880	-0.495059281018561	7.53281354662272	-6.00961200295139	0.000184479349482422	0.00473906427787936	0.626573582764941
TGGT1_254080	-0.477661379901599	7.14533843270914	-5.99140064815601	0.000188714412135266	0.00478888934411154	0.620649224369899
TGGT1_224130	-0.451160183552739	9.65662305051548	-6.04738871235535	0.000176019485923897	0.00469180621976217	0.603550239599448
TGGT1_295995	3.20563745652949	1.79388565237728	5.51324477934796	0.00034797637847048	0.00695649289169038	0.596259138596368
TGGT1_248800	0.517691155764475	6.08525822584027	5.8779088933698	0.000217603325426944	0.00532547355502169	0.565726116273234
TGGT1_232980	0.574450735979034	5.64178588217596	5.82242931947973	0.000233441212603799	0.00559364187831472	0.553660189544674
TGGT1_243240	0.60967955040038	4.50613657663163	5.66452552372861	0.000285765303222733	0.0062058424108308	0.539528629992851
TGGT1_269885A	-0.361518739390869	7.65097989121503	-5.9379913306158	0.000201754844946246	0.00500890999529001	0.526283471360387
TGGT1_259230	0.484538362999011	5.91639215834775	5.82969701022916	0.000231297160451712	0.00558115990325061	0.522574899987139
TGGT1_286600	-0.464715041349261	8.00484555189032	-5.9451474198281	0.000199952260385856	0.00499453975515857	0.52230067724259
TGGT1_244680	-0.479487716859433	5.93572745205496	-5.82380688247085	0.000233033167357575	0.00559364187831472	0.51615284955322
TGGT1_311840	-0.531362646292595	7.49008596145093	-5.91245262237504	0.00020833300641372	0.00513514725844858	0.498688685770984
TGGT1_309030	2.50056727071833	1.78268708675761	5.42483034164647	0.000391004842498889	0.0074952420041694	0.490650105772073
TGGT1_310220	-0.42315000572211	7.37980690693615	-5.90166683069963	0.000211180702177277	0.00518674888883261	0.488527619915991
TGGT1_309100	0.589009550765321	5.45875594489122	5.73916084899999	0.000259603789858521	0.00591157371806969	0.470401371682939
TGGT1_288475	1.38324509771848	1.49030894926195	5.40243687430306	0.000402792782783523	0.0075477001831125	0.458090344245647
TGGT1_235478	0.423780116189304	7.2733780690915	5.86172875407853	0.000222098460162448	0.00537806729062379	0.4386451641296
TGGT1_204010	1.90906121731796	2.484177168702	5.37302221360317	0.000418863239310111	0.00769605774839208	0.427739682605227
TGGT1_300360	-0.531635589301794	5.17437708356449	-5.66755990906356	0.000284647743763234	0.0062058424108308	0.426091593661007
TGGT1_221990	-0.418873156855093	6.54798175333036	-5.80838425557589	0.000237645942130583	0.00565498665755024	0.421644564817504
TGGT1_263100	0.42416483848897	7.98135031459227	5.86808125933751	0.000220321730633186	0.00535389590658805	0.419798363185521
TGGT1_294805	2.15568522591238	1.8806797337366	5.36039423954435	0.000425973603271545	0.00774978960237677	0.41706306912167
TGGT1_261510	0.584501731506414	5.61800498627306	5.71779467518041	0.000266817609885384	0.00600396375947134	0.416267340910186
TGGT1_232320	0.867604324123205	5.78000353584874	5.72640389532938	0.000263885117195814	0.00596953273340661	0.408929008557026
TGGT1_222120	0.410617845144155	6.74295620544721	5.81057068249034	0.000236986024804209	0.00565498665755024	0.402459001001573
TGGT1_220610	0.687849636941267	6.30137617697925	5.75614642942351	0.000254019652155637	0.00588131161220472	0.376588062797818
TGGT1_244710	0.573119967956831	5.74672103377172	5.69884139489823	0.000273398615544841	0.00607596925850639	0.370691514537554
TGGT1_321580	-0.899272556274516	4.35998304860525	-5.50580650114267	0.000351391449211913	0.00700440288762413	0.367298887101673
TGGT1_411170	0.551825479961921	4.74437103286019	5.56519631672796	0.000325101742335915	0.00667380502102713	0.359614778699243
TGGT1_304930	1.36189837454033	2.02521643659792	5.3087997922674	0.000456407487980497	0.0079865503685544	0.354605809395384
TGGT1_225110	-0.899448929563525	6.74404401116568	-5.76488390218069	0.000251197926787326	0.00583610858958257	0.35413335501036
TGGT1_320000	-0.611995372656542	4.97757805222639	-5.58220803265566	0.000317968988969536	0.00658636366609487	0.34737801820076
TGGT1_225320	-0.818243804144313	6.2706332730734	-5.71681583676252	0.000267153251475677	0.00600396375947134	0.334309811567723
TGGT1_252870	0.839627472407106	4.38789811401644	5.49251173302544	0.000357585926235841	0.00706643222621804	0.333552254379254
TGGT1_264900	-0.412728966175798	7.2026667604919	-5.77942544926758	0.000246576784438436	0.00577051931691572	0.331811289205055
TGGT1_217030	0.675598790063238	5.49567113789565	5.63643043529911	0.000296341118308127	0.00638779068010648	0.325920787127697
TGGT1_281545	0.590118716284657	5.2914849320716	5.6117665794621	0.000305974823754933	0.00651451660359962	0.325204675613242
TGGT1_230340	-0.448475321310823	7.93090992967394	-5.79663655284023	0.000241225943727604	0.00569190155405902	0.324853803030119
TGGT1_242010	0.47942948934205	6.5207079431299	5.73343339133161	0.000261516589863349	0.00593547718973681	0.319536544361045
TGGT1_217555	-0.460024217029502	6.7852212620216	-5.74842046108521	0.000256543325836906	0.00588131161220472	0.319193857980516
TGGT1_246160	0.740811814499637	6.31900919057323	5.70665021600504	0.000270666172865792	0.00606309860194806	0.307726172952302
TGGT1_209160	-0.370616602374076	6.98149388750294	-5.7457569808972	0.000257419629965628	0.00588131161220472	0.298961623018125
TGGT1_202080	0.468600517602833	5.93210683852772	5.66372064851272	0.000286062533696868	0.0062058424108308	0.295161127549352
TGGT1_202360	0.501674695520181	5.31134024778506	5.58500475983861	0.000316812648891264	0.00658636366609487	0.284170553088401
TGGT1_297170	0.807404409444429	3.95424648152923	5.39478032005902	0.000406910771620723	0.00758353760551684	0.27866457136445
TGGT1_262500	-0.490678019074354	7.40753413587019	-5.7471824098043	0.000256950251131361	0.00588131161220472	0.27844870397491
TGGT1_242790A	-0.50564026057461	5.46517964205546	-5.59064983827507	0.000314492454503492	0.00658636366609487	0.271358990899663
TGGT1_201180A	0.808363609148577	3.74032890491079	5.36124647782833	0.000425489661718789	0.00774978960237677	0.26923581901001
TGGT1_275970	0.824106022540757	3.501230659171	5.33391709332301	0.000441308468003178	0.00786682792155514	0.269079767745078
TGGT1_254835	0.640325155459416	5.0703465854546	5.54103389952662	0.000335531682351868	0.00672726349718307	0.268248888375766
TGGT1_217660	0.793722510803265	6.58322854479972	5.69744238547667	0.000273891300005378	0.00607596925850639	0.26760129568957
TGGT1_247520	-0.37570238192083	9.76461984814343	-5.79923961102092	0.000240427676941123	0.00569190155405902	0.267437872246296
TGGT1_271250	0.712681534542806	4.88165321651716	5.50183411927449	0.000353230076781979	0.00701311944783211	0.249946257351967
TGGT1_262740	0.462803122424783	5.85286874735358	5.61443680298578	0.000304915661536479	0.0065121273428148	0.238434820367132
TGGT1_263070	0.351764388125157	7.48842460562264	5.70163359104762	0.000272418162935887	0.00607596925850639	0.21211839243905
TGGT1_204000	1.67838976743221	2.53748437434383	5.20645145267778	0.000523950046847303	0.00872446603430727	0.207149813099613
TGGT1_319520	1.36199631315301	3.84359268912432	5.31173207205939	0.000454616382251541	0.00798566539657476	0.1966837728079
TGGT1_207240	-0.541834673418946	5.95877827249219	-5.58557357018647	0.00031657802449592	0.00658636366609487	0.189328105510887
TGGT1_226068	-0.368028362900041	7.37965999908346	-5.67224730835441	0.000282930667900838	0.00619654204826134	0.176598778258952
TGGT1_234250	-0.371648772484652	7.8481489647534	-5.68484421436898	0.000278371500051679	0.00611616870880318	0.175329491516739
TGGT1_321360	0.533699289307442	4.84509089872646	5.43992672727746	0.000383268612425721	0.0074037591226171	0.16829911614672
TGGT1_305480	0.742894737681632	5.21469547770843	5.48564975042573	0.000360829238729337	0.00708977907069043	0.167302321180641
TGGT1_224140	1.56605381906797	2.2659299303819	5.16462335088468	0.000554589711364057	0.00908074629773957	0.164713904240616
TGGT1_253090	0.579075460150284	6.37140929653052	5.59727058486786	0.000311794639961693	0.00658636366609487	0.149821084729636
TGGT1_293330	0.430528257468175	5.82685307120674	5.54520212474944	0.000333706910352928	0.00672726349718307	0.146314701908792
TGGT1_201630B	-0.405208070044141	6.96709048826648	-5.63190603816065	0.000298083474465996	0.00638779068010648	0.144344821224874
TGGT1_262490	-0.360715273837169	7.68410187929581	-5.6316950021669	0.000298165015023147	0.00638779068010648	0.108507661689863
TGGT1_244080	-0.46861239089579	6.91850715962931	-5.60192851072095	0.000309911637522291	0.00657797015815061	0.107490882559545
TGGT1_208910	-0.454882578866892	6.77195675220868	-5.5890717749363	0.000315139201080965	0.00658636366609487	0.101337856025914
TGGT1_215955	1.49509638048906	2.1165103431318	5.0936057312623	0.000611120716499385	0.0095083193831816	0.0767286341021682
TGGT1_208820	0.784893686935252	6.40770604941381	5.54517855038326	0.000333717200556247	0.00672726349718307	0.0756150493185892
TGGT1_313210	1.11192319048869	3.28691961964475	5.15952793638292	0.000558452105818697	0.00910065197088906	0.0650589433111231
TGGT1_266950	-0.743564803346039	6.74319211564401	-5.55365551640125	0.000330039029707618	0.00669521654070588	0.0603785322875101
TGGT1_210412	-0.567567176948637	4.2482806503978	-5.27242167976947	0.000479272378785995	0.00823989037227821	0.0578780890422355
TGGT1_229310	0.557451551275422	5.99699355752362	5.49019814858368	0.000358675906771599	0.0070676624953246	0.0476361381087385
TGGT1_295380	0.439542545974538	6.19189955125844	5.50046040416638	0.00035386832170972	0.00701311944783211	0.0359623620620271
TGGT1_305510	-0.38326168197028	7.31571494787285	-5.5622158385918	0.000326369129174607	0.00667596373281514	0.0273677119410056
TGGT1_313120	0.442951353848871	5.75029719661092	5.4482249382125	0.000379086691574765	0.00736434796033801	0.0227921313175532
TGGT1_268760	-0.362939841261326	8.42813464589736	-5.58751466805856	0.000315778769095464	0.00658636366609487	0.0181237263339398
TGGT1_310480	1.00455057097833	3.08387802688588	5.10315126432238	0.000603174003776327	0.0094703827031274	0.012359317532475
TGGT1_237530	0.515101510025908	6.01804086340066	5.44268087214612	0.000381875150360088	0.0073976208704967	-0.0220294116010447
TGGT1_258832	-0.496692903601713	5.81044356290722	-5.41807593369075	0.000394520638567411	0.0074952420041694	-0.0227253078529497
TGGT1_233695	-0.45337151714833	5.61601871303724	-5.37893802591789	0.000415576414035218	0.00768257795516182	-0.0480630441680576
TGGT1_267370	-0.49362613215065	5.89162782886701	-5.39757123701185	0.000405404468586928	0.00757599600671821	-0.0635579056096107
TGGT1_290580	-0.591780814838408	6.07595883885038	-5.40323994507176	0.000402363474791829	0.0075477001831125	-0.0798223423249107
TGGT1_216500	0.468022245557073	6.28045146290106	5.41803168244355	0.000394543784427705	0.0074952420041694	-0.0900440674329825
TGGT1_232780	-0.464977463895197	6.76612404427461	-5.45020388819386	0.000378096686451825	0.00736434796033801	-0.0915920505889796
TGGT1_215775	0.975352083163347	6.08403958050333	5.39256336580802	0.000408111603992475	0.00758536081258447	-0.0942711374198604
TGGT1_206400	0.927176050185503	4.70328040175572	5.21414036140136	0.000518518932554687	0.0086549871339286	-0.111929949073261
TGGT1_257420	1.36737561871764	3.3440894126801	5.03239541407217	0.000664833883403129	0.0101376111223133	-0.113634493161897
TGGT1_232580	0.975322653163206	2.18089604702939	4.95264157141986	0.000742565636664608	0.0107734681083175	-0.114254610185235
TGGT1_227310	0.679651847410424	3.64592251926369	5.06505157992133	0.000635572400428097	0.00982209302863825	-0.126005767165045
TGGT1_251560	-0.435963679735323	6.75252655516616	-5.42204145357906	0.000392452392893634	0.0074952420041694	-0.130549734144012
TGGT1_290840	0.383158979689128	6.82250165344257	5.42841864305953	0.000389150839155719	0.0074952420041694	-0.131988577958815
TGGT1_263420	-0.512849453828129	6.10335092031594	-5.36897339241014	0.000421128933276401	0.00770240338867503	-0.13327294990585
TGGT1_258480	0.540350916877797	7.63520029734843	5.45465141543442	0.000375881907866327	0.00734357920567253	-0.136187226537516
TGGT1_215510	0.752034846917206	6.26026908433916	5.37229257286256	0.000419270567635005	0.00769605774839208	-0.149488073868858
TGGT1_255215	-0.703111155740353	5.70131773319639	-5.31078228825443	0.000455195700953513	0.00798566539657476	-0.151593711506068
TGGT1_293380	0.434480174527493	5.48601683759132	5.28745863921584	0.000469674741502487	0.00813590226023325	-0.16129297156978
TGGT1_253120	1.7157826340797	4.99789840243674	5.18771579497222	0.000537442487238425	0.00886329013126775	-0.172917635151649
TGGT1_218490	0.435590711371181	6.4473003939084	5.3715905451986	0.00041966288434594	0.00769605774839208	-0.17515749359821
TGGT1_265030	-0.668024833598583	3.82769075336417	-5.04643120423884	0.000652083320028527	0.0100097700710629	-0.178758349024617
TGGT1_240440	-0.477653074188464	5.14916148577887	-5.22449711404734	0.000511299061704288	0.00857610645692777	-0.1861004781303
TGGT1_319900	-0.338521021356198	7.65023631906647	-5.41910275801801	0.000393983963976242	0.0074952420041694	-0.187015049158037
TGGT1_219260A	0.651690828450349	4.91630908942379	5.19333065463497	0.000533360094064311	0.00881710905500064	-0.188985925386477
TGGT1_299210	0.374492238144787	7.34597911867051	5.407413209999	0.00040014045853793	0.00753908474894616	-0.191635725582556
TGGT1_223780	-0.506881254169324	6.35149465029818	-5.34823481231297	0.000432943392111589	0.00781457141089605	-0.193403177989897
TGGT1_222935	1.39637667138504	3.44300492274861	4.98469296416427	0.000710211997561717	0.0105454972156177	-0.193679484258706
TGGT1_219540	0.346703825941041	9.32327341325914	5.45675501521922	0.000374839243163209	0.00734357920567253	-0.195845570567256
TGGT1_214600	0.545927618275023	7.60069781608103	5.41023963167612	0.000398642413451945	0.00753908474894616	-0.197446343808782
TGGT1_218870	-0.400704758944103	5.65480007557706	-5.27311035789254	0.000478828225186903	0.00823989037227821	-0.20499448641721
TGGT1_311500	0.461908870857391	5.6051161704226	5.26823838251288	0.000481979903240473	0.00826577504883973	-0.208064273927828
TGGT1_217780	0.503000009026561	5.33967553692593	5.23459421458781	0.000504364413456447	0.00850125997877448	-0.21066774642312
TGGT1_313840	-1.20474297066968	1.50173652893871	-4.86681424268176	0.000837258751164818	0.0116085250640332	-0.211474037338827
TGGT1_299130	0.461027423087266	5.61315972750024	5.26377073778876	0.000484889687590956	0.00829499099891295	-0.215739044853978
TGGT1_291840	0.598149122033337	3.84696722849582	5.02708110136139	0.000669731346337092	0.0101672019177929	-0.21601623332925
TGGT1_288860	0.400966043403684	6.50324230672543	5.33156020791125	0.000442702109297926	0.00786682792155514	-0.238279072813285
TGGT1_225330	-0.466099035779293	7.03766577649704	-5.35629266731511	0.000428310995706482	0.00777175387196168	-0.245375384295712
TGGT1_310140	-0.486865931021984	4.94471481237064	-5.15264350446857	0.000563716685993302	0.00914311238107533	-0.249522058280653
TGGT1_243590	0.434527748383143	5.64857399193372	5.24199117495025	0.000499348573819887	0.00844196981588516	-0.252655345274682
TGGT1_218270	-0.460659848986568	8.2190612929404	-5.38515406975853	0.000412152753903622	0.00763982341939409	-0.257344348057794
TGGT1_235635	0.843014098839809	4.2184606077594	5.03655763418946	0.000661025044624268	0.0101019316264024	-0.26988439639956
TGGT1_278130	-0.487558945823524	7.18822852618952	-5.34519747881435	0.000434703538003461	0.00782487124808333	-0.270330657378287
TGGT1_239820	-0.306187068419125	9.71842787135343	-5.40803407339632	0.000399810871594316	0.00753908474894616	-0.274701367172572
TGGT1_305470	0.565124407620255	6.93887720022992	5.33225192140817	0.000442292603037201	0.00786682792155514	-0.274900721193054
TGGT1_205265	1.02501911345765	6.73657721322442	5.31279359103012	0.000453969851994936	0.00798566539657476	-0.278446294641635
TGGT1_270940	-0.449498824539144	5.12525726947315	-5.15384791477063	0.000562791819584493	0.00914311238107533	-0.28303147146544
TGGT1_297450	1.1818921455563	2.0522950541705	4.82031310942052	0.000893911388289384	0.0119895618862867	-0.284750502137416
TGGT1_308590	-0.458399630407777	5.67130546211091	-5.2164159627542	0.000516923204437675	0.00864934519931361	-0.287149993465432
TGGT1_293720	-0.494070105847201	7.52246196929883	-5.3413786650095	0.000436927520614221	0.00782487124808333	-0.29178069532226
TGGT1_305050	-0.379210141238395	7.77436674944884	-5.34248119686062	0.000436284175344169	0.00782487124808333	-0.300466646529403
TGGT1_217550	-0.399790036319658	7.18622247145125	-5.32221807103989	0.000448273069973403	0.00792486864320588	-0.303717610607506
TGGT1_242080	-0.39772055288436	5.98434796617291	-5.23251769394927	0.000505782234985999	0.00850431400977681	-0.312834708342083
TGGT1_214820	0.376017471934319	6.11934563679377	5.24158993404708	0.000499619269312965	0.00844196981588516	-0.320925795633031
TGGT1_263660	-0.496978798637931	4.93951629956588	-5.09811879848535	0.000607349606140915	0.0094925982759797	-0.326461716921547
TGGT1_218790	0.428398468838838	6.49173237141625	5.26004357087008	0.000487331691538431	0.00831607951044613	-0.338823381772161
TGGT1_305260	0.564904549558472	4.81114634176308	5.07167241020665	0.00062981050681428	0.00975497039495902	-0.344538786592083
TGGT1_265520	0.423856943043655	7.51781049567095	5.30363068739867	0.000459583463949039	0.00802171442024757	-0.34579479333364
TGGT1_221295	-0.655434883589251	5.23683634882321	-5.11387229106685	0.000594381097972161	0.00943324761287412	-0.356485674199668
TGGT1_205520	1.30226405441835	1.46818688434385	4.752819305759	0.000983576985121146	0.0127075627176717	-0.360281460219718
TGGT1_294200	-0.564935267970849	10.2081775164151	-5.35287745349843	0.000430267810414874	0.0077867150847976	-0.363056558626004
TGGT1_240250	-0.428672573488237	7.57881519046875	-5.2890317502722	0.000468682713483635	0.00813590226023325	-0.368855648231888
TGGT1_250700	0.472849076826484	7.75004603838629	5.29108286019407	0.000467392644866491	0.00813590226023325	-0.372600026255857
TGGT1_294790	-0.403513366954875	8.97270111592413	-5.32317118263476	0.000447701254828213	0.00792486864320588	-0.373912346032077
TGGT1_206610	0.485641023293838	7.26088494027454	5.27262101309328	0.000479143775798557	0.00823989037227821	-0.379184511195612
TGGT1_214340	0.449092109566593	5.72251868601132	5.15963643324318	0.000558369562461574	0.00910065197088906	-0.382173265946889
TGGT1_265650	-0.552617300443074	4.22461793046958	-4.95743599443557	0.000737626889402783	0.0107639880256911	-0.38385489566419
TGGT1_213620	0.780329226834801	4.83006969029941	5.04009599136837	0.000657805557580222	0.0100751198652098	-0.389649813567587
TGGT1_264850	0.559673246358996	6.20914903741115	5.19401902250163	0.000532861906557426	0.00881710905500064	-0.399205521449583
TGGT1_225860	-0.406049494776867	7.12495626761496	-5.24762448510925	0.000495564731488469	0.00841481150233629	-0.4067612386657
TGGT1_254340	-1.05753139699807	2.27142268789699	-4.73908179612279	0.00100298204633492	0.0128206459714596	-0.407060009178272
TGGT1_200290	-0.349768820509211	7.40058312330604	-5.25098197092518	0.000493324249751524	0.00839750214242878	-0.416151393917533
TGGT1_408250	1.20144362099238	2.65427329016941	4.73282281054624	0.00101195893436906	0.0128636628311571	-0.450624785122995
TGGT1_270890	-0.54092231318776	5.63148469252115	-5.09623968721331	0.0006089167357289	0.00949551109208082	-0.451850330959023
TGGT1_251730	0.488934310170008	5.75596805842647	5.10894529703799	0.00059840473996121	0.00943859953374596	-0.460014689561128
TGGT1_247420	0.455720998751769	7.09514956620798	5.19838365313504	0.000529714769122722	0.0087991508870941	-0.477462674622013
TGGT1_301216	0.436546406211571	5.06178265550279	5.00655745198523	0.000689012567974733	0.0103620544318922	-0.488144716642664
TGGT1_222310	0.359709390754438	6.06859524801821	5.11660879807222	0.000592158911630455	0.00942656674833944	-0.494359918865321
TGGT1_223970	0.438660317937007	4.92825417968257	4.98349660491954	0.000711392024970212	0.0105454972156177	-0.496448287352253
TGGT1_309860	0.956696745648254	2.93334869909051	4.71220985511199	0.00104213667802843	0.0131660030115583	-0.514718043691357
TGGT1_263200	-0.348918709382849	6.5247315691309	-5.13570089769556	0.000576901841458311	0.00933495050284425	-0.518779290835903
TGGT1_224530	-0.328891548688534	7.44669218651842	-5.1746179122749	0.000547097013355438	0.00897944191132541	-0.528127800481746
TGGT1_315810	0.367116379956397	6.41510618083163	5.11933503075404	0.000589953960187087	0.00941325611184826	-0.532998083400831
TGGT1_218240	-0.351328519197565	8.01782169229892	-5.18593039400939	0.000538747642517365	0.00886355870237301	-0.534433526542211
TGGT1_248370	-0.411515354150624	6.62585364939229	-5.11995744735676	0.000589451795915272	0.00941325611184826	-0.5510421873185
TGGT1_225480	-0.469314803362699	5.5481372556841	-5.00947421338732	0.000686236362128015	0.0103620544318922	-0.565614267225003
TGGT1_289300	0.355820064698654	7.11050494902485	5.13153777128632	0.000580192266621703	0.00934396951163463	-0.57559323960186
TGGT1_286465	1.25920136679687	1.52152875373719	4.57659553854122	0.00126634858951266	0.0149377002574246	-0.595649546369703
TGGT1_211440	0.479952627689261	7.33186796306716	5.11975781806083	0.000589612806219859	0.00941325611184826	-0.602938050959223
TGGT1_270170	-0.447894807192414	5.74578768317573	-5.005417915993	0.000690100469653431	0.0103620544318922	-0.604382478092405
TGGT1_249570	-0.356544310087436	7.75635234948991	-5.12984570666953	0.00058153540075318	0.00934396951163463	-0.605397537587641
TGGT1_286220	-0.494183765484424	4.71012655177979	-4.87349564666836	0.00082944061979329	0.0115466865229119	-0.606332665298022
TGGT1_283810	-0.383495689295762	6.29142322744859	-5.05660847201237	0.000643002583242064	0.0099146384864477	-0.607062253039169
TGGT1_248870	-0.416705358963165	6.23424603028892	-5.04738649148052	0.000651225119561352	0.0100097700710629	-0.613152542352648
TGGT1_232130	-0.409611473301515	8.23950999070688	-5.13153413811153	0.000580195146997406	0.00934396951163463	-0.622181171396693
TGGT1_224290	0.519675282419133	7.25617296131569	5.09985931950688	0.000605901929546003	0.00949154343846894	-0.628232409714719
TGGT1_316280	-0.457622806009651	7.88354413690795	-5.1110360884182	0.000596693719877889	0.00943324761287412	-0.637873956535851
TGGT1_286595	-0.515686449080629	5.44027311979262	-4.9446222974577	0.00075090590997527	0.0108486973590335	-0.641521386894564
TGGT1_236050	-0.622031718058823	5.90627062590832	-4.99434205513553	0.000700771202008101	0.0104538038095655	-0.641616472180017
TGGT1_230830	0.735611864003583	4.19766163752864	4.77577385436238	0.000952044656132048	0.0124708782861335	-0.64573466318819
TGGT1_300300	-0.619930387578898	3.51225037168777	-4.66274366634781	0.00111855985688179	0.0138282125347601	-0.674458137327214
TGGT1_215520	-0.348068653395986	6.34839621185506	-5.01097179650076	0.000684815621411899	0.0103620544318922	-0.680883894685405
TGGT1_285150	-0.614579045630407	4.97421807615842	-4.85563752007771	0.000850514396724607	0.0116975837510173	-0.682721086103411
TGGT1_291350	0.497014027804221	5.95271360435692	4.97306390164264	0.000721772085056715	0.010634687545371	-0.68680518392775
TGGT1_219430	0.41959801018575	5.76983530988252	4.95479111844124	0.000740347002494095	0.0107639880256911	-0.687599778163411
TGGT1_289570	0.389910484278379	7.912704551076	5.07471249601033	0.000627183671378759	0.00973621243357049	-0.691724332580311
TGGT1_225150	-0.321884891771069	9.39350711584312	-5.11168536244156	0.000596163452268539	0.00943324761287412	-0.692012110516687
TGGT1_227810	-0.404644353798629	9.17750773336242	-5.10688519168644	0.000600095814926449	0.00944361308752675	-0.692474055829524
TGGT1_264485	0.73363703984777	4.34226733713538	4.75873760141536	0.000975341411484381	0.0127034524370797	-0.700787289480245
TGGT1_292100	-0.538845018513933	5.93626909759034	-4.94974107033598	0.000745570692486062	0.0107942940046877	-0.713529514813039
TGGT1_233790	-0.466378183374801	5.99969498125361	-4.9559395617507	0.000739164568353424	0.0107639880256911	-0.715083046596477
TGGT1_207630	-0.444883875000387	5.17193258064355	-4.86134144099068	0.000843721595622148	0.0116511514319147	-0.71698050430417
TGGT1_227615	0.765593231938415	2.6668112863185	4.54845795807037	0.00131903792981688	0.0153391279769471	-0.717176040294914
TGGT1_223140	-0.318009246838752	7.05217369965596	-5.02941452648244	0.000667576191269047	0.0101569059012328	-0.719599387936674
TGGT1_212200	-0.675053158871333	6.17388039498915	-4.9661538780365	0.000728736792837997	0.0107083823169806	-0.719957658795694
TGGT1_285940	0.952159391584528	2.42617280481889	4.5263944072888	0.00136199140924783	0.0155588287730852	-0.721061106293241
TGGT1_223520	1.25681694811118	2.79126598766079	4.53978581481413	0.00133574570321044	0.0154126228204332	-0.739049825633913
TGGT1_271750	-0.540407434636078	4.5229526874488	-4.75027347826486	0.000987142518414315	0.0127075627176717	-0.747598109250523
TGGT1_220290	0.453074978627366	4.74037304408538	4.78650821395251	0.000937672527765311	0.0123769174154358	-0.747766233323726
TGGT1_283890	0.680728505388952	4.5110474597078	4.75097785200002	0.000986154630596922	0.0127075627176717	-0.748947040217703
TGGT1_216030B	-0.622473019225525	3.69729281085189	-4.62996917048937	0.00117248628828772	0.0141708052804124	-0.755754703459832
TGGT1_237830	0.335541119040544	6.89893557126507	4.999032579922	0.000696230745460248	0.0104086496446307	-0.755934525801617
TGGT1_217400	-0.760205802618106	5.07183121331872	-4.81021079499392	0.000906754877693385	0.0121019368952255	-0.764734310253979
TGGT1_245770A	1.00729721407814	2.72878932334059	4.51745818601869	0.0013798116070475	0.0156473206802227	-0.767200631791233
TGGT1_307570	-0.347720857277489	7.37617424627364	-5.00759227798265	0.000688026229315615	0.0103620544318922	-0.768486639150057
TGGT1_223855	-0.576963688850802	5.84305967902143	-4.89787890240263	0.000801567220275892	0.0113423410984307	-0.77460785616143
TGGT1_212150	0.45542147406775	5.95930751434817	4.9131740016229	0.000784597395143758	0.0112189076531355	-0.776270106989839
TGGT1_264260	-0.768372307662313	2.67579259827384	-4.5053702481074	0.00140431418807061	0.0157155184673773	-0.777203150880175
TGGT1_233260	-0.649433912647424	5.36642494738863	-4.83985307834518	0.000869619901744101	0.0118517375453754	-0.779849667245653
TGGT1_277050	0.634002108390459	5.21317928989879	4.82484145157974	0.000888217791673788	0.0119535689889249	-0.780872038799505
TGGT1_215385	0.539662084185562	4.07781246544533	4.66589685736405	0.00111351346156128	0.0138012643930181	-0.785297503598723
TGGT1_248350	0.853871381482526	2.81609120730223	4.50689923352745	0.00140118937903704	0.0157155184673773	-0.794899187473519
TGGT1_290900	-0.589601057019088	4.72720994894228	-4.74573774836248	0.000993529364342506	0.0127276497682716	-0.795613270850349
TGGT1_230850	-0.405450992741623	7.33543054439176	-4.98336880299351	0.000711518206782992	0.0105454972156177	-0.80203595667318
TGGT1_237410	-0.532764125052511	5.99600676035291	-4.89438764562927	0.000805495742855474	0.0113745261265238	-0.803918131160897
TGGT1_289190	0.542355739377394	5.47535134953696	4.83788497638395	0.000872034200663072	0.0118517375453754	-0.810185817827758
TGGT1_293650	-0.827887686548419	2.55870675103928	-4.47226150211352	0.00147383683854742	0.016179458881782	-0.8107337889444
TGGT1_360620	-0.418849573459365	5.65350858019655	-4.84448051018496	0.000863971577706108	0.0118214175017506	-0.826916867931309
TGGT1_290640	0.40082562974906	8.6681518708369	5.00000518396448	0.000695293224000748	0.0104086496446307	-0.832126940849835
TGGT1_220230A	0.657987065725697	6.3236303182205	4.90538132153729	0.000793194595189919	0.0112935801886565	-0.833591382626732
TGGT1_248240	1.0990315974753	3.52369511731709	4.55208270293754	0.0013121208011181	0.0153199571295232	-0.835808144154049
TGGT1_248445	-0.384777552158019	7.34904420881038	-4.95539433953608	0.000739725674446828	0.0107639880256911	-0.844014730967777
TGGT1_218800	0.391927431195614	5.7304729008345	4.83927024987931	0.000870334117371551	0.0118517375453754	-0.852300667008873
TGGT1_252990	-0.376241568516871	5.65252176772124	-4.82505923819227	0.000887944945594127	0.0119535689889249	-0.856381978379735
TGGT1_238410	0.581711838750879	5.87257611996682	4.84392598651915	0.000864646357914871	0.0118214175017506	-0.864869255018494
TGGT1_230480	-0.468094915640362	6.30799642277852	-4.8738823912721	0.000828990483130858	0.0115466865229119	-0.87681546276577
TGGT1_259630	-0.455708111285041	8.46589854755609	-4.95897359008892	0.00073605049303908	0.0107639880256911	-0.884070962967918
TGGT1_272695	0.404201128507185	7.07504891615844	4.91309203379384	0.000784687302771294	0.0112189076531355	-0.893686755152655
TGGT1_310530	0.588024177198768	6.88105273256344	4.90284782076583	0.000796011405561698	0.0113102694959665	-0.894089247200093
TGGT1_250100	-0.768913334735878	7.91878492721151	-4.93424745453393	0.000761845698404389	0.0109836747755283	-0.898844683157565
TGGT1_226755	-0.417487377564185	6.31632282132344	-4.85882401398494	0.000846712393871184	0.0116690203059161	-0.900754396396538
TGGT1_294800A	0.337731786383524	9.96486491606295	4.97589540351995	0.000718938870224219	0.0106325647538322	-0.905650584626955
TGGT1_216460	-0.499860181759698	6.84184946744561	-4.88473122459963	0.000816469663050025	0.0114583968574834	-0.914451149906819
TGGT1_205250	-0.33251131444024	10.2905337731008	-4.97266196765203	0.000722175233922968	0.010634687545371	-0.916565302750201
TGGT1_208790	-0.347422456427651	6.63220317039887	-4.87144504720368	0.000831831725178801	0.0115565793415245	-0.917514549538189
TGGT1_213115	-0.48286193223877	5.07063107216248	-4.71135997796509	0.00104340143104541	0.0131660030115583	-0.919126557129228
TGGT1_248430	1.16679094843328	3.08162174456592	4.44002482283569	0.00154506867483348	0.0164735461656277	-0.925791798454632
TGGT1_212800	-0.375624967126296	5.59479694645748	-4.77186068441333	0.000957342556635322	0.0125164349087093	-0.925874163467028
TGGT1_318525	-0.550370312712232	5.42672252577466	-4.74924146694741	0.000988591835677526	0.0127075627176717	-0.927327215291632
TGGT1_273490	0.312360945833051	6.90945343166664	4.87960093215425	0.000822365125702895	0.0114947255476805	-0.933343397546183
TGGT1_213770	0.312729255719205	7.19146786827067	4.88759394695531	0.00081319971184756	0.0114583968574834	-0.938144470469122
TGGT1_275568	0.380717999761145	5.56845729230998	4.75539648223499	0.000979981602801158	0.0127075627176717	-0.95067345979524
TGGT1_271930	-0.305410229997725	9.20718237192763	-4.93002919390328	0.000766342513480491	0.011025392186622	-0.953642118285279
TGGT1_212900	-0.411104825200366	6.7733427394287	-4.85424060043642	0.000852186921515149	0.0116975837510173	-0.955431468644097
TGGT1_277685	-0.400188102686514	6.03950435419346	-4.79428431853263	0.000927406567564936	0.0123123068825175	-0.961265568530184
TGGT1_282055	-0.538771104650574	8.76507857057172	-4.91410392908581	0.000783578164895406	0.0112189076531355	-0.961893704982719
TGGT1_295360	-0.477681015030591	8.31619644779496	-4.89866782231509	0.000800682344439602	0.0113423410984307	-0.967425970354536
TGGT1_243280B	0.555919357112202	4.66557642937764	4.62339165701115	0.00118364030536036	0.0142305845803553	-0.973864422541954
TGGT1_222210	-0.360448039201269	5.58386182027305	-4.73722735401741	0.00100563283162123	0.0128306808591079	-0.976128511990249
TGGT1_321490	1.34853532535271	2.65965515413902	4.36227029059701	0.00173243454427002	0.0176280885287147	-0.979370171413596
TGGT1_305250	-0.341735092150904	8.36977519210627	-4.88611775681673	0.000814884133888942	0.0114583968574834	-0.988477331803531
TGGT1_255690	0.639787987634731	6.78294839167499	4.83302275317289	0.000878029647858389	0.011886239937642	-0.989260878785913
TGGT1_206710	-0.443287622018869	5.81723865090795	-4.75084828712664	0.000986336266441318	0.0127075627176717	-0.992538554585012
TGGT1_267642	1.77112989758202	2.02439428899165	4.3020184764776	0.00189423980220341	0.0186896515347961	-0.997617594451196
TGGT1_247550	0.280748519669919	8.73901009582213	4.88330862665152	0.000818099877421018	0.0114583968574834	-1.00765844528199
TGGT1_233920	1.02168938774571	5.17358996959485	4.66110897355622	0.00112118566575105	0.0138282125347601	-1.00868563106393
TGGT1_290650	0.383436986586763	6.07220397290749	4.76658761385319	0.000964531628810612	0.0125864971752003	-1.01029446553693
TGGT1_253430	-0.290655430343209	10.4298783768998	-4.90881325552109	0.000789395944015737	0.0112628130850544	-1.01372509294776
TGGT1_208800	-0.395496409429995	6.42069606232922	-4.78899343299648	0.000934378371026734	0.0123652506123525	-1.01738435018612
TGGT1_285870	-0.378625382755911	8.47629554824801	-4.86489917361815	0.000839514196078155	0.0116163765119305	-1.02432719548508
TGGT1_243600	-0.516631509401379	6.06831608642274	-4.75228799163707	0.000984319970370067	0.0127075627176717	-1.02616569967055
TGGT1_301222	0.478961274982336	6.43049101229498	4.78332374536922	0.000941911753931536	0.0124090558080214	-1.0295283672736
TGGT1_260580	-0.374409473042468	7.12541003563716	-4.81856281745279	0.000896122554827888	0.0119895618862867	-1.03573900843455
TGGT1_221980	0.500400051536395	5.3637377712622	4.67362547860074	0.00110124730663418	0.0137197060284842	-1.03615737631597
TGGT1_277690	0.397271394060769	5.82506990927671	4.7222091823117	0.00102737880210298	0.0130355793764985	-1.04171707798527
TGGT1_203380	0.323172059928502	7.74118522341229	4.82742453241366	0.000884987457194441	0.0119535689889249	-1.05035551496279
TGGT1_244640	-0.355279005409572	7.23770011717944	-4.8092074663332	0.000908041215346278	0.0121019368952255	-1.05611485691182
TGGT1_265070	-0.51881540617435	5.1437499503141	-4.62776652750968	0.00117620890947227	0.0141908573165628	-1.05823931458305
TGGT1_258780	-0.436580343710116	5.6882928451229	-4.69151068143683	0.00107341290310222	0.0134716552567851	-1.06068793459633
TGGT1_262530	0.43583836165125	6.9059079400892	4.78853084154348	0.000934990594506808	0.0123652506123525	-1.06809716332142
TGGT1_286620	0.471562288017477	6.80418725835496	4.7764585884168	0.000951120855116477	0.0124708782861335	-1.07784660954738
TGGT1_258900	-0.487604886731476	5.23839503108924	-4.6259438357939	0.0011792989491939	0.0142032204441445	-1.07991022147379
TGGT1_228660	0.350233983074039	8.17884988687417	4.8196853654783	0.00089470375141784	0.0119895618862867	-1.0799712685603
TGGT1_273960	0.30130962504523	7.545421915722	4.80016467275059	0.000919723423943813	0.0122339226043745	-1.08366086742046
TGGT1_239130	0.622098124551813	4.9963578742056	4.59062909356085	0.00124091504637659	0.0147438659339289	-1.08938789545014
TGGT1_293690	-0.302236503028153	9.07577140761506	-4.83394352909611	0.000876890883341496	0.011886239937642	-1.09260571616296
TGGT1_204490	0.446912997271366	5.48470284606592	4.64499926771933	0.00114741849524005	0.0139966423197011	-1.1014412339887
TGGT1_243340	0.47522681635118	5.38620161535244	4.61721226386935	0.00119422267695335	0.0143077863230108	-1.12549719062723
TGGT1_313590A	0.38861237946223	6.43967787502404	4.71621957856636	0.00103619168254686	0.0131231863736184	-1.13188588460819
TGGT1_291800	-0.528520311041954	4.62413969323514	-4.50415785788052	0.0014067972577562	0.0157155184673773	-1.13790386126927
TGGT1_239410	0.401628620904077	8.35315593574702	4.78192273757991	0.000943783308258596	0.0124099384529529	-1.14401899490285
TGGT1_291075	1.20621861638643	2.26448511795793	4.21674586710822	0.00215129498961592	0.0205830099516398	-1.14837517791222
TGGT1_321550	0.473342525794757	5.85887861546621	4.637563226668	0.00115974815936646	0.0140911450388041	-1.17363652969186
TGGT1_275330	0.579636407531586	5.08389419938031	4.54610225874881	0.00132355421663171	0.0153486442703114	-1.17444696013501
TGGT1_253180	-0.380185763887831	7.78533224632694	-4.74550660102881	0.000993856031054504	0.0127276497682716	-1.17530884604657
TGGT1_286770	-0.654750544359391	5.19026448970492	-4.54496669262684	0.00132573719595244	0.0153486442703114	-1.18901705909322
TGGT1_290730	0.318059419920682	6.63076013638058	4.69145322713326	0.00107350110232925	0.0134716552567851	-1.19075425599177
TGGT1_239480	0.379995425089726	6.23795040483215	4.64756410537491	0.00114319835196011	0.0139889236057467	-1.21108359212491
TGGT1_318460	0.413757936307731	6.21274775959834	4.64470744900587	0.00114789970456761	0.0139966423197011	-1.21206639624486
TGGT1_252390	-0.371374204061883	6.33651400141845	-4.65272288397288	0.00113476040717611	0.0139352630716967	-1.21307930630106
TGGT1_260230	0.546941440589798	6.30916418687499	4.65075106673956	0.00113797770856856	0.0139498622135936	-1.21415188849751
TGGT1_218950	0.336386324801127	5.92759843703894	4.61445002312654	0.00119898578205272	0.0143398699533505	-1.21999836052996
TGGT1_212950	-0.527489566388402	5.08889081573944	-4.51046938858931	0.0013939218823194	0.0156633999750172	-1.22482906964517
TGGT1_248170	0.517119036803977	4.08249029876684	4.37267148819599	0.00170602517922915	0.0174848512035154	-1.22616809581884
TGGT1_262390	0.315388324707517	7.6128215499826	4.70304268268665	0.00105586604271228	0.0132988842046379	-1.23245296138609
TGGT1_221720	0.356047135552995	7.14305531444364	4.68939158807574	0.00107667110653199	0.0134868255002195	-1.23279300015807
TGGT1_248310	-0.556946993805388	4.08268085433393	-4.36019055636973	0.00173776720839751	0.017652326576292	-1.23876243021749
TGGT1_233830	0.466589389877411	4.80572294101886	4.46185613627432	0.00149643814559952	0.0162563697317323	-1.24868332244424
TGGT1_312420	0.286329408750341	9.27814566173742	4.73405978456537	0.00101017801345842	0.0128636628311571	-1.24943090033414
TGGT1_305950	-0.352229541334394	5.68564662459358	-4.56630534838542	0.00128535185069807	0.0150842400635676	-1.25155366651343
TGGT1_244400	-0.543782890270881	4.07299220071296	-4.34961273422965	0.001765161934032	0.017825284317677	-1.25301373760116
TGGT1_307575	-0.457558757693205	4.54283988829663	-4.41735229874105	0.00159736267759078	0.0167710887538806	-1.25396728137987
TGGT1_306490	-0.337044805897538	7.47297023342441	-4.68474584255046	0.00108385127566246	0.0135274867926148	-1.25440282975739
TGGT1_288210	-0.315192295347513	6.29420606664286	-4.62025976791122	0.00118899115202163	0.0142699688524481	-1.25783255990939
TGGT1_201760	-0.332484828992988	6.93835843608444	-4.65934136854596	0.00112403239885573	0.0138282125347601	-1.26336394373628
TGGT1_259700	-0.464285495396233	6.02367558930231	-4.59039183818335	0.00124134046470043	0.0147438659339289	-1.26535681468759
TGGT1_212180	1.41573292897134	1.66844271138327	4.09342013367249	0.00259068032541132	0.0228998825165214	-1.27437222509258
TGGT1_238190	0.325062155158082	6.01767782874651	4.583702268596	0.00125339983551313	0.0148358531305057	-1.27944951768359
TGGT1_205120	0.831985463698357	4.05865903189218	4.3308659281561	0.00181484947825085	0.0181669866985897	-1.27976420957204
TGGT1_308950	0.340579427126251	7.5858282491636	4.66943812181918	0.00110787503327437	0.0137773175476091	-1.28228968446563
TGGT1_212100	0.362830484120106	5.39586848107706	4.51180929905142	0.0013912047273042	0.0156584532073175	-1.28823850824274
TGGT1_301010	0.323358518450978	6.02968980221663	4.57154573891587	0.00127563642209265	0.0149958148286002	-1.29963609061871
TGGT1_225200	-0.395750728454393	8.8610821307844	-4.68793163189241	0.00107892201762297	0.0134904485730785	-1.30509552696775
TGGT1_241870	0.358993008370181	5.97266816309529	4.56169948244067	0.00129395622994339	0.0151593475184339	-1.30652683530851
TGGT1_271470	0.302510997179026	6.93551611314482	4.63269474405724	0.00116789732106411	0.0141549320902961	-1.3065504779836
TGGT1_235402	0.449700432433742	5.43774923900359	4.50191599844427	0.00141140112146573	0.0157155184673773	-1.31028577838751
TGGT1_229420	-0.413634074626023	6.52964637267003	-4.59965755996185	0.00122484157157615	0.0145983284016104	-1.31513100292648
TGGT1_312110	0.460505082450763	8.05979957727481	4.65992423064652	0.00112309284359611	0.0138282125347601	-1.31583756885906
TGGT1_248440	-0.397487186842275	6.32557961293531	-4.57973358801183	0.0012606133853426	0.0148955983694176	-1.32238205994924
TGGT1_245485	-0.382296557491681	5.93322779033924	-4.5427151741067	0.00133007683596488	0.0153730057158496	-1.32625705466842
TGGT1_242720	0.394367591556503	6.45714318069613	4.58834848169809	0.00124501083297876	0.0147619646524051	-1.32774417371516
TGGT1_202830	-0.390108945465196	8.65280864235607	-4.66570838037063	0.0011138144158972	0.0138012643930181	-1.33111415438189
TGGT1_266785	1.04016212443158	1.64525660432551	4.04811449584791	0.00277521178989811	0.0241278526916932	-1.34075131310185
TGGT1_216910	-0.43717168969311	6.42188478833477	-4.57422435103874	0.00127070075429367	0.0149633717247904	-1.34166447916937
TGGT1_307590	1.06279109995581	2.30265298178583	4.07900134117115	0.00264795559528654	0.0232864330291375	-1.35654491976909
TGGT1_209130	-0.452866712373632	5.30215600426222	-4.44582748834108	0.00153198050508799	0.0164103269992057	-1.36647672560698
TGGT1_257000	0.619438070569008	4.42679195970798	4.32725744898995	0.00182458342160448	0.0182114081137504	-1.37003232047733
TGGT1_254950	0.444696597149831	5.74113574686191	4.4940522085548	0.00142767777000466	0.0158102093789405	-1.37447539419893
TGGT1_281640	0.500231969215352	5.12200536510676	4.41961161623754	0.00159206786581492	0.0167410561364055	-1.37612890622874
TGGT1_236220	0.466180336011343	5.96513468807655	4.51454977860179	0.00138566501297886	0.0156473206802227	-1.37668684145452
TGGT1_205750	-0.319177974529006	6.25508524580572	-4.53664017712538	0.00134186187110616	0.0154467286556601	-1.38044043403358
TGGT1_250340	-0.421763542302943	6.60145350696121	-4.55967765017658	0.00129775271367419	0.0151779683876487	-1.38348927505196
TGGT1_410250	0.871071693481444	1.66302953789666	4.01963568464005	0.00289829585332107	0.0248523448669439	-1.38404384954274
TGGT1_295110	-0.315338398478091	9.15604178085339	-4.63197060955956	0.00116911464698098	0.0141549320902961	-1.40020839886147
TGGT1_223940	-0.266623785580414	9.55740195697142	-4.63955971406262	0.00115642393024022	0.0140756236606407	-1.40036390704763
TGGT1_262600	-0.377038524821544	5.78020156955855	-4.47852556186176	0.00146040672246768	0.0160948990871959	-1.40087918356657
TGGT1_261500	-0.351633217834631	6.18166056583269	-4.51505235173411	0.00138465165099804	0.0156473206802227	-1.403787590928
TGGT1_304970	0.39341475930042	8.10656454164256	4.60319441610609	0.00121860570008435	0.0145492211796529	-1.40418300252277
TGGT1_263330	-0.678531105080135	5.08855905683043	-4.38846206690631	0.00166674871064845	0.0172771780495625	-1.40677220558174
TGGT1_249620	-0.439147217581177	5.44823838270044	-4.43669422436872	0.0015526348363213	0.016508531244911	-1.40710830938816
TGGT1_215070	0.352929299529956	6.19794394214605	4.51214296275534	0.00139052898319175	0.0156584532073175	-1.41259501072493
TGGT1_287220	-0.456418033920299	6.11857292017451	-4.50038392540959	0.00141455662808005	0.0157155184673773	-1.41638142259748
TGGT1_212160	0.664072511673184	4.43216177443618	4.2960471675787	0.00191113053044976	0.0188292903408352	-1.4184141605751
TGGT1_210400	1.29539194355791	3.46955144983153	4.15363883938309	0.00236530213983769	0.0219813281292754	-1.41858554926986
TGGT1_293060	0.477243752561281	6.0432977245072	4.49072307087664	0.00143462878343846	0.0158616433178558	-1.42415247921884
TGGT1_254820	0.432226654406722	6.88256405242943	4.55070655151012	0.00131474234517407	0.0153245476402748	-1.42677622392144
TGGT1_226350	0.392974046841641	5.40358223750208	4.41229862139009	0.00160927430703043	0.0168447175181861	-1.44214949757343
TGGT1_214830	0.424262186550856	5.68010392610039	4.44331509746227	0.00153763273397041	0.0164197209806125	-1.44265324124852
TGGT1_269050	-0.906036013010926	5.18381985056791	-4.36325715653697	0.00172991021581313	0.0176280885287147	-1.45645054295106
TGGT1_226870B	0.449673247053534	5.70700532435657	4.43170959958308	0.00156403241307853	0.0165435031199167	-1.46448325218848
TGGT1_237820	-0.394595235468032	6.03411235025226	-4.46187017762256	0.00149640739854753	0.0162563697317323	-1.46477237205702
TGGT1_229240	1.59923966908405	2.7211161740841	4.03676291320249	0.00282359591810329	0.0244249926148382	-1.46504213655138
TGGT1_314780	-0.303776362228539	7.75243771952445	-4.54771828628437	0.00132045423329253	0.0153391279769471	-1.47464670361863
TGGT1_204330	0.328973820031767	5.93037921733333	4.44724491396645	0.00152880145034122	0.0164020405223818	-1.47615565607173
TGGT1_205730	-0.707617131165251	3.89691184975415	-4.17446905390484	0.00229226580285366	0.0215648589962033	-1.47932009959306
TGGT1_258130	-0.391261997384961	5.61932506845313	-4.40818838576918	0.00161903207640146	0.0168954227456948	-1.48187454033544
TGGT1_409020	-0.499044213628097	4.02983803229941	-4.19422003169798	0.00222522278405593	0.0210204080850998	-1.4824721024284
TGGT1_271090	-0.731815365901045	5.16750423738998	-4.34833346415541	0.00176850607951723	0.0178328684880352	-1.48355144824188
TGGT1_313550	0.462320305761851	6.02590725016468	4.45052586349159	0.00152146978973904	0.0163742531205561	-1.48359784576306
TGGT1_202790	0.390860471117879	5.5181326700435	4.39817117495504	0.00164307834138045	0.0170944776908825	-1.48451995388885
TGGT1_291050	-0.304323203277898	7.42276829270868	-4.52784979222139	0.00135911250702355	0.0155588287730852	-1.4916403309662
TGGT1_212210	-0.317733222581624	7.1953777195233	-4.51856810814364	0.00137758476717103	0.0156473206802227	-1.49506181740583
TGGT1_227330	-0.364115144950907	7.76944705953778	-4.53350144459764	0.00134799444939766	0.0154760564749711	-1.49717919197095
TGGT1_320230	0.602761396626722	3.34755394871977	4.0913728454086	0.00259873204975511	0.0229253463754957	-1.50321374284996
TGGT1_259990	-0.297689689191155	7.49436128047974	-4.52112963997018	0.00137246019985345	0.0156437420823996	-1.50502635980917
TGGT1_224520	-0.289866626385986	7.4929385082852	-4.52037182587595	0.00137397414828695	0.0156437420823996	-1.50614406083125
TGGT1_213325	0.365550262159144	6.96270608754058	4.49832631182141	0.00141880641455879	0.0157373092143884	-1.51359038605926
TGGT1_289760	0.290851085330767	6.53249342602096	4.46880820123185	0.00148129702496158	0.0162203126772859	-1.52002347445913
TGGT1_285980B	-0.370169459378458	7.72491620628184	-4.51648804358274	0.00138176115611156	0.0156473206802227	-1.52149457811528
TGGT1_360830	-0.513074633428919	8.80286033765813	-4.53595717953149	0.00134319379614436	0.0154467286556601	-1.53471174528208
TGGT1_309080	0.476820286175037	5.13796376210146	4.31780695649633	0.0018503407405201	0.018441729380517	-1.53640101963843
TGGT1_221530	-0.339452237623395	6.58627796630033	-4.459748613346	0.00150106075027628	0.0162563697317323	-1.53653273915462
TGGT1_249340	-0.297200413195621	7.66756676494026	-4.50152178083671	0.00141221234567339	0.0157155184673773	-1.54221991366065
TGGT1_310620	-0.376175532798234	6.98225349907852	-4.47866828155789	0.00146010225856734	0.0160948990871959	-1.54229930759714
TGGT1_312260	0.514451119279135	6.82569453820559	4.47165807930622	0.00147513751910387	0.016179458881782	-1.5428696185706
TGGT1_300130	0.865782976371022	3.81805383634664	4.1203238971102	0.00248729478797172	0.0225067450748441	-1.55072646516743
TGGT1_264200	0.434262611850714	5.52329323299108	4.35416587137554	0.00175331411262364	0.0177839840007563	-1.5531457598091
TGGT1_268260	0.521816526555706	5.89004535217573	4.39066051022134	0.00166135734551828	0.0172585414881106	-1.55572070493034
TGGT1_273930	-0.447802714691678	6.89213334799217	-4.46452248288958	0.00149061158700853	0.0162563697317323	-1.55597633407635
TGGT1_213830	-0.355244865773865	5.68810921600898	-4.36706233748759	0.00172021348329346	0.017604029947335	-1.55796775674242
TGGT1_239770	-0.471872507203704	6.09254117680607	-4.40270017659328	0.00163215966308406	0.0170066090954986	-1.56308934329112
TGGT1_294640	0.359846956518744	8.1727802112314	4.50095710323432	0.00141337521147158	0.0157155184673773	-1.5638602661201
TGGT1_216540	-0.479279609568324	4.73746515750432	-4.24300601789027	0.00206839331233321	0.0200061052164775	-1.56387066596352
TGGT1_242070	0.293528655020755	9.42981388500226	4.52750395942599	0.001359796010719	0.0155588287730852	-1.56872207958809
TGGT1_266900	-0.29194069300844	7.30819480986486	-4.47358795913603	0.00147098195615431	0.016179458881782	-1.57009270816132
TGGT1_318610	-0.985205061377825	2.05444528158051	-3.91075102282695	0.0034248477835182	0.0277416704443518	-1.57627482752542
TGGT1_269660	0.34192195114988	6.99681174982305	4.45844857030402	0.00150391984089541	0.0162617244431411	-1.57747337912511
TGGT1_294430	0.372549311055947	6.00558561049592	4.38677213226977	0.00167090571005294	0.0172794264180964	-1.58000510993651
TGGT1_286610	0.49024264380674	4.39676356481455	4.18625585828408	0.00225200243372318	0.0212441985414463	-1.58308042727566
TGGT1_274160	-0.512515086482299	6.08418482905718	-4.38509435910964	0.00167504372915614	0.0172853529726848	-1.58856480395973
TGGT1_271950	0.524270961689362	5.82780825762652	4.36212060321817	0.00173281777597951	0.0176280885287147	-1.59051307771902
TGGT1_410300	1.09130823551167	2.25145045805405	3.91763106062462	0.00338875239217287	0.0276119078210578	-1.59101994981546
TGGT1_309720	-0.423618509212397	6.94378949368631	-4.4437558108877	0.00153663963581259	0.0164197209806125	-1.59255078051556
TGGT1_253600	-0.3575327882365	6.02392885673416	-4.37616402996218	0.00169725386719922	0.0174209176787	-1.59627627038781
TGGT1_272600	-0.342077360774378	7.52443914099796	-4.46254547540601	0.00149492946050271	0.0162563697317323	-1.59647012288295
TGGT1_276220	-0.369932309905815	5.67235699904531	-4.34007601364929	0.00179025495713005	0.0179573288921898	-1.59686586345302
TGGT1_297150	-0.573094337816531	4.6125333607757	-4.2014306996619	0.00220126853493032	0.0209010637925976	-1.59897214389461
TGGT1_215360	-0.356220786865648	6.82501894539431	-4.43082527523131	0.00156606376778621	0.0165435031199167	-1.60384854131288
TGGT1_236960	-0.529961579162093	7.47518869158242	-4.45108448467841	0.00152022522863522	0.0163742531205561	-1.6116245819677
TGGT1_211460	0.289910434365817	7.86779021214396	4.46009446167946	0.00150030112836223	0.0162563697317323	-1.61399562032272
TGGT1_219520	0.294885893820335	7.37028466104338	4.44723580117766	0.00152882186634386	0.0164020405223818	-1.61410190343095
TGGT1_269240	-0.501649301551449	4.2482441965897	-4.13868770362415	0.00241924572141141	0.0222421829226554	-1.61685043651517
TGGT1_312270	-0.346105471944034	8.28133476910856	-4.46775532707381	0.00148357956580091	0.0162203126772859	-1.61943185685869
TGGT1_210810	-0.550702626112112	5.75285773803745	-4.32842403887554	0.00182143045459226	0.0182063622619636	-1.62449217615344
TGGT1_279420	-0.279219776907916	7.97668097327533	-4.45126368903223	0.0015198262065777	0.0163742531205561	-1.63224158109316
TGGT1_409790	0.960285771369613	2.14521852776046	3.88212665049259	0.00357943850821135	0.028323203341616	-1.63262567508007
TGGT1_315580	-0.419725233507027	7.43649347548697	-4.43646762376835	0.00155315104194524	0.016508531244911	-1.63288507138782
TGGT1_210815	-0.800143592988227	3.23166276572601	-3.98688939273625	0.00304700309850306	0.0257162575372818	-1.63460263526265
TGGT1_293510	-0.341198908911542	7.2265071244802	-4.4252609391083	0.00157891017937818	0.0166513717400625	-1.64052016296826
TGGT1_263800	0.467034691737157	4.26619995565362	4.12396798678844	0.0024736314320079	0.0224125999445564	-1.65057903818016
TGGT1_235960	0.535812098395343	4.19380820131731	4.11000285288759	0.00252642939070474	0.0227114443397078	-1.6551765420414
TGGT1_247340	0.895993396902992	2.16163496045936	3.86807609913783	0.00365800018122101	0.0287555223204086	-1.65631858438814
TGGT1_294380	0.500480908827176	6.20952032488562	4.3510441714094	0.00176142799281012	0.0178150882595887	-1.66204069753803
TGGT1_263327	-0.766082724087186	3.78608001767831	-4.03872326567435	0.00281517685069357	0.024413582852736	-1.66450008672736
TGGT1_214880	-0.291269671534606	8.09389937826224	-4.43182775247098	0.00156376122059865	0.0165435031199167	-1.66716697743459
TGGT1_273560	-0.282034408728745	8.20776129720737	-4.43367048578786	0.00155953814083662	0.0165435031199167	-1.66912578952634
TGGT1_236890	-0.354223024276704	7.43593076989095	-4.41059423020212	0.00161331292789795	0.0168613267555535	-1.6731218001775
TGGT1_268985	-1.01939846280592	1.98680219533742	-3.83886172258788	0.00382723002959704	0.029639483010742	-1.67572315588899
TGGT1_244050	0.627524740088764	6.50973673622831	4.36429357929759	0.00172726334394731	0.0176280885287147	-1.67707496873809
TGGT1_266390	0.553330745691308	5.44936241117899	4.26418811960525	0.00200399881824216	0.0194929276846553	-1.67860531753354
TGGT1_301218	0.663090353337729	2.72163178428687	3.90472790734579	0.00345678081806336	0.0278070495353524	-1.67986375847198
TGGT1_289590	0.603432852049532	3.33156444013304	3.97285961725629	0.00311316624595691	0.0259820925648613	-1.68272583237789
TGGT1_204140	0.457093298907558	5.54832851782401	4.27264647356141	0.00197888387851432	0.0193430323309195	-1.68409666750344
TGGT1_313940	1.32574511100682	3.28983510364744	3.95764146409545	0.00318665499416299	0.0265310246911124	-1.68524432616874
TGGT1_240510	0.334633514512871	5.89873028337765	4.30887123449976	0.00187505138370308	0.018556599199978	-1.68590475250259
TGGT1_260360	0.400342874518526	5.52070251088394	4.2681443309856	0.00199220989930627	0.0194057046423927	-1.68677626074729
TGGT1_233245	0.440867042073517	5.9671127630224	4.30962810281966	0.00187294479990604	0.018556599199978	-1.69385099890793
TGGT1_210975	0.352840792784815	6.0025123526023	4.31103489658764	0.00186903597651331	0.018556599199978	-1.6973893239427
TGGT1_312120	0.707324059538413	2.63094175190841	3.88189814796718	0.00358070180456965	0.028323203341616	-1.70044427082435
TGGT1_201220	-0.373646756126254	5.7320997179717	-4.27821991723707	0.00196251812179569	0.0192254090079615	-1.70312085651379
TGGT1_232030	-0.377114246444884	8.41932586658993	-4.41429280487663	0.00160456269540586	0.0168210025248569	-1.70790601681523
TGGT1_210430	-0.295779068194734	7.51089199306419	-4.38320260824502	0.0016797226043347	0.0172925933383379	-1.71897646760631
TGGT1_227960	-0.291417258655785	7.61307312683357	-4.38042938289702	0.00168660683216409	0.0173375114869843	-1.72745927519619
TGGT1_294340	-0.325649601632821	7.83813619745038	-4.38450261119004	0.00167650580671525	0.0172853529726848	-1.73026182994628
TGGT1_313540	0.332681139227262	8.01956056165139	4.38788133600508	0.00166817598151949	0.0172771780495625	-1.73227904324758
TGGT1_291170	0.690433317762085	3.5459991484983	3.96637105213925	0.0031442780632404	0.0262099396859445	-1.73459808928597
TGGT1_205390	-0.480615870096872	4.75334720050122	-4.13283973441601	0.00244069904750436	0.0223200629650099	-1.73927117811067
TGGT1_360500	0.679345121432898	4.47670500070361	4.09500651598317	0.00258445947627124	0.0228998825165214	-1.74084318013849
TGGT1_319570	0.333966456970202	6.96079145385807	4.35099284639325	0.00176156172989971	0.0178150882595887	-1.74184969527288
TGGT1_209830	0.763923704999812	4.18140892544583	4.04880524057131	0.00277229610024776	0.0241278526916932	-1.74420545483434
TGGT1_252385	0.605369668805882	3.24798793236219	3.91993747663371	0.0033767421406775	0.0276030874214954	-1.74860559552793
TGGT1_301120	-0.372766218761215	6.03503645954913	-4.27887487730836	0.00196060438628384	0.0192254090079615	-1.74914126703516
TGGT1_245460	0.260503719932966	10.5295511333899	4.42430967282771	0.00158111760160838	0.0166513717400625	-1.75212839176276
TGGT1_283710	0.312762173600392	6.8637717049803	4.33968426298641	0.00179129382289402	0.0179573288921898	-1.7524435370091
TGGT1_209020	0.70827998534753	4.73000339290412	4.11837920568638	0.0024946190688231	0.0225433578663554	-1.75994212878572
TGGT1_232955	1.17007143968571	2.50682582372429	3.82208944757708	0.00392809967155302	0.0301775824012946	-1.76811994634326
TGGT1_268182	-0.374230110208907	5.14932692712693	-4.16345651919787	0.00233057557632542	0.0218356515509399	-1.77675518070708
TGGT1_265780	-0.377514162949317	5.81820646698205	-4.23793993536497	0.0020841182037899	0.0201272725718192	-1.78021222489075
TGGT1_290920	0.43390859306696	6.65142492535898	4.30876117395633	0.00187535792409259	0.018556599199978	-1.78059517574629
TGGT1_318720	-0.384028266865832	5.29131528218483	-4.17757641150935	0.00228157749029448	0.0214937101380207	-1.78220261980929
TGGT1_290740	0.427559569395995	4.71015652815524	4.10342595847958	0.00255170748647031	0.022760171704872	-1.78368408167331
TGGT1_313900	-0.576720023555092	6.28910480273904	-4.27221717664355	0.00198015046691396	0.0193430323309195	-1.79061498449508
TGGT1_226860	-0.297646589485667	7.82945685628312	-4.34019992189061	0.00178992650411145	0.0179573288921898	-1.79893128992645
TGGT1_239560	-0.585612338357785	4.78779480586475	-4.09566004429888	0.00258190133479506	0.0228998825165214	-1.80192949437747
TGGT1_249870	-0.327853559665825	5.73027730155904	-4.21290768001993	0.00216370475870456	0.0206091379856111	-1.8059398653755
TGGT1_294700	0.425742790056377	5.81790429613772	4.22283177453218	0.00213177263114337	0.0204465835207433	-1.80742583379244
TGGT1_246060	0.408110488686381	5.74173887052029	4.21467888163506	0.00215796861642174	0.0205830099516398	-1.80822712330184
TGGT1_295630	0.409188902868341	5.84890607300311	4.22338485154746	0.00213000782995968	0.0204465835207433	-1.81151607442336
TGGT1_293258	0.876976563252198	4.06478518181106	3.98674876675124	0.00304765884730037	0.0257162575372818	-1.81171264906693
TGGT1_267490	0.961470419316354	3.19611962571626	3.8679471781153	0.0036587293922288	0.0287555223204086	-1.81458140015444
TGGT1_263595	0.323854958698823	6.03154751509511	4.23708830608875	0.00208677407935249	0.0201272725718192	-1.81726904994333
TGGT1_265080	-0.344147765036928	7.05998839124818	-4.30394641235461	0.00188882034326121	0.0186629561790335	-1.8195523355385
TGGT1_275690	0.27651617614947	8.8378698519619	4.34610902555128	0.00177433707652434	0.017865470095546	-1.83100049344778
TGGT1_297800	0.304032870227112	7.75661136124485	4.31311061115687	0.00186328438790641	0.0185438592411467	-1.83811626711046
TGGT1_248425	0.911971221630081	2.70000793932903	3.79104578697941	0.00412226223530029	0.0310842076668422	-1.84806956186842
TGGT1_285290	-0.432910581344894	5.93793312459974	-4.20076419324804	0.00220347117196935	0.0209010637925976	-1.85629025326785
TGGT1_233860	0.391044245918771	5.32747982858284	4.13444792899443	0.0024347793199062	0.0223090697500426	-1.86072109144528
TGGT1_314460	0.461730987244442	4.0175043762418	3.95048766084603	0.00322183257057618	0.0266555710916976	-1.86552786033417
TGGT1_270770	0.341570220576471	7.18685578337206	4.28013253813032	0.00195693517748904	0.0192254090079615	-1.86581416010081
TGGT1_315160	-0.298943485331879	6.97791365229179	-4.27088495337448	0.00198408652416084	0.0193539901087292	-1.86625973590698
TGGT1_228680	0.858465075575477	2.16193023011553	3.72891871320039	0.00454182130136895	0.0332631577098129	-1.86699065505046
TGGT1_307850	-0.371331722467106	6.26780169573267	-4.21606200140794	0.00215350053913027	0.0205830099516398	-1.87903225609172
TGGT1_226100	0.533685252796038	4.49752315111855	4.01013684465278	0.00294062426078224	0.0250901650637711	-1.8812549817546
TGGT1_232035	-0.324573593848392	5.43989959094304	-4.13088988235598	0.00244789690004209	0.0223561580100789	-1.88396194518778
TGGT1_254335	-1.02593854334564	1.9216670487964	-3.69415831110158	0.00479594946056304	0.034177973513256	-1.88590357651221
TGGT1_258826	0.345181551911962	5.45103369414558	4.12749392107972	0.00246048687525134	0.0223819685728882	-1.8952445975306
TGGT1_319600	-0.365769663567813	5.82970510377671	-4.16498675072297	0.00232521186903228	0.0218356515509399	-1.89691078034567
TGGT1_226870A	0.38609067917633	6.28615515715769	4.20358984530812	0.00219414914940474	0.0208702125870766	-1.90327986149922
TGGT1_214400	-0.398880296026299	5.83114741027259	-4.15876901072999	0.0023470879608386	0.021871170605267	-1.90629950475287
TGGT1_214610	0.316363797739425	6.67237452997901	4.22836193740901	0.00211419625149299	0.020334723946178	-1.90951154507635
TGGT1_306070	-1.08207968214613	1.65913287256631	-3.65795461520946	0.00507656932621121	0.035264209349853	-1.91288138282173
TGGT1_257360	0.766727185074907	5.45437769058629	4.1101998413497	0.00252567638042601	0.0227114443397078	-1.91725504794818
TGGT1_239780	-0.417807998029791	6.37658415741513	-4.19532231951203	0.00222154306037668	0.0210145139287626	-1.9244749378191
TGGT1_267660	-0.262878212136017	7.33135180159943	-4.24665491063802	0.0020571454984917	0.0199534408929865	-1.92480783219424
TGGT1_268690	0.355462881764208	5.43711052657494	4.10371699040596	0.00255058326033179	0.022760171704872	-1.93017650620242
TGGT1_291650	-0.551076186317475	4.25532764265922	-3.93654845967414	0.00329156065824424	0.0271090570619708	-1.93369868779005
TGGT1_294800B	0.331402837406343	9.09564744802038	4.28536416510554	0.00194175020928052	0.0191035996984579	-1.93495829378202
TGGT1_235905	0.354852506690494	5.2410153456782	4.06971014342003	0.00268557271495541	0.0234970528762702	-1.94636890680409
TGGT1_272320	0.317379387725408	6.87113612778271	4.2148159637151	0.00215752534224979	0.0205830099516398	-1.94874429823457
TGGT1_277850	0.365003619794237	6.07018364935044	4.1555003829634	0.00235867562255405	0.0219494076539975	-1.95080698096718
TGGT1_248690	-0.315803927960831	5.57967785090055	-4.10364165779091	0.00255087421201176	0.022760171704872	-1.95223276661538
TGGT1_231210	-0.315743749916041	7.36555771773874	-4.22952709377604	0.00211051274992339	0.02032772574401	-1.95314991607866
TGGT1_260800	0.351905920228947	6.1774005150701	4.16010955485069	0.00234235306790245	0.021871170605267	-1.95799078712442
TGGT1_243690	-0.291879779083085	8.3406144558162	-4.24713230128949	0.00205567874693281	0.0199534408929865	-1.96608580211115
TGGT1_408800	-0.49236052255025	8.3276250466452	-4.244460058414	0.0020639033736905	0.0199907936631966	-1.96944280860188
TGGT1_320592	0.320369944301646	6.22539954459116	4.15002343780203	0.0023782283765569	0.0220418821369027	-1.98029657627008
TGGT1_314885	0.878735012301258	2.24635647532371	3.66109569467892	0.00505155292530614	0.0351554828926236	-1.98136420748651
TGGT1_260205	-0.55430566038765	3.64006866646991	-3.81569106215085	0.00396731507819386	0.0303073039249115	-1.98733557014226
TGGT1_316100	0.376575675910366	5.37326611807333	4.0569444928034	0.00273818302662005	0.0238662670140255	-1.99199449393476
TGGT1_232475	-0.863280874833644	2.5676881099955	-3.68189649905101	0.00488912225282945	0.0344846089566237	-1.9921996219361
TGGT1_314970	0.31091566239	7.18708539275873	4.19830825833717	0.00221160765702191	0.0209493469109362	-1.9946597968004
TGGT1_315680	0.312256496336032	5.93637341063971	4.11508312355789	0.00250708538793896	0.0226262811192339	-1.99607412248702
TGGT1_210270	-0.590947894195708	6.32769726774599	-4.14451605852598	0.00239806336495473	0.0220929686578417	-1.99613128705257
TGGT1_215195	1.80452252944245	1.77478337582624	3.60299350291401	0.0055359757051636	0.0372878598671989	-2.00154254712796
TGGT1_293560	1.62893889559914	1.85287012369115	3.60010471640873	0.00556129694517077	0.0374217603639329	-2.01647451872836
TGGT1_267590	0.318345544565333	6.62662378219004	4.14636737456028	0.00239137627504373	0.0220929686578417	-2.03416028075926
TGGT1_323020	-0.762645497259893	6.4284495469963	-4.12461832183719	0.00247120141398799	0.0224125999445564	-2.0362066139652
TGGT1_250830	-0.339451476336202	5.99905448974633	-4.09345552533515	0.00259054136731083	0.0228998825165214	-2.03642559568185
TGGT1_224110	-0.382877242469579	6.97813910000377	-4.16175206228658	0.00233656544124657	0.021861987128507	-2.03702143743082
TGGT1_285500	-0.363256364068145	6.94351701264027	-4.15915466818219	0.00234572475220273	0.021871170605267	-2.03879220696574
TGGT1_297670	1.49872528272312	1.64915541230185	3.56819385068594	0.00584921876369516	0.0387151852145636	-2.04507629332259
TGGT1_247470	0.306151863182339	7.14397686090375	4.16408168550671	0.00232838268246729	0.0218356515509399	-2.04655375235836
TGGT1_290040	-0.274172237106088	6.65957326350828	-4.13735284628807	0.00242412496925341	0.0222572862664295	-2.04910253951347
TGGT1_293470	-0.299820117426191	6.83554578849456	-4.14403524526124	0.00239980334265054	0.0220929686578417	-2.05479557994636
TGGT1_320440A	0.480386160777823	4.42027281335331	3.8875898126605	0.00354937459703043	0.0282692859361608	-2.05813413432531
TGGT1_207990	0.361084798241383	6.59259756107436	4.1248520897578	0.00247032854431643	0.0224125999445564	-2.06434334647805
TGGT1_238895	-0.271743458573965	7.16201125389546	-4.14649537217306	0.00239091467034174	0.0220929686578417	-2.07438335867954
TGGT1_200440	0.449293145736706	5.19699695727679	3.97790978542581	0.00308917673049911	0.0258931356550894	-2.08270372967566
TGGT1_240460	-0.358734340568372	4.69116644315018	-3.90801158964587	0.00343933276663149	0.027793526951968	-2.08373708899062
TGGT1_259270	1.64993030673161	2.77682463137034	3.63728197583901	0.00524448908458468	0.0359943627092703	-2.08549296597302
TGGT1_225105	1.1920965719343	5.42238766571058	3.9922689876521	0.00302202942050655	0.025625766121854	-2.08585542926788
TGGT1_312050	-0.457498166841429	6.48758906845269	-4.10031015658231	0.00256377648967656	0.0228382006729348	-2.08707207871586
TGGT1_257480	-0.456418492621332	5.75911008404361	-4.03570544284525	0.00282814847274049	0.024433639506327	-2.08806922883197
TGGT1_267070	-0.319441864025148	6.94427221150988	-4.12822796675652	0.00245775971128965	0.0223819685728882	-2.0884784850538
TGGT1_305040	0.437065085437152	7.50316594069635	4.14413731570081	0.00239943385587707	0.0220929686578417	-2.09415445434588
TGGT1_315480	2.17198823807604	2.20263392936377	3.56859427425178	0.00584551072412427	0.0387151852145636	-2.09525095674637
TGGT1_314770	0.413684571277508	4.62298297957192	3.89334269879464	0.00351800428038441	0.0281317621351204	-2.09669560356825
TGGT1_204280	-0.321720197657246	6.71504326971537	-4.10752042780768	0.00253593917123808	0.0227384271500023	-2.10128280898569
TGGT1_240520	0.277020474936338	6.30816231296317	4.07480726916559	0.00266486644481105	0.0233753654859255	-2.11023797385829
TGGT1_320740	-0.273028790415638	7.34588661009208	-4.12894907718651	0.00245508372784567	0.0223819685728882	-2.11139187390981
TGGT1_202960	0.518255162082872	3.55091257523508	3.72796707612518	0.00454858676889094	0.0332663258505709	-2.11202685136202
TGGT1_229500	-0.381856831333548	5.70229815619461	-4.01490770535317	0.0029192833061666	0.0249986705700692	-2.11330987420993
TGGT1_268670	-0.816391724127992	2.00609400547057	-3.55211215258189	0.00600019377587221	0.0393358747346742	-2.11425157746734
TGGT1_309850	-0.325896703671696	5.69468494094611	-4.01415695077397	0.00292263067301667	0.0249986705700692	-2.11426939097891
TGGT1_264060	-0.278432672928927	6.58101699506005	-4.09031936295202	0.00260288559777581	0.0229253463754957	-2.11545956814698
TGGT1_408680	-0.357634633729239	6.86203308705958	-4.10636385064602	0.00254038279488023	0.0227476725005096	-2.11597553389255
TGGT1_251430	-0.845637086994157	1.48485147528031	-3.51188409090429	0.00639598438695385	0.0410309558107105	-2.11733117614276
TGGT1_250020	-0.776732452554324	3.02116083521909	-3.64923869434812	0.00514666857888078	0.0354645689548729	-2.12107840617562
TGGT1_215910	0.297370754268499	8.44480137176087	4.15045899679859	0.00237666714637024	0.0220418821369027	-2.12363554800847
TGGT1_242320	0.356768890224341	6.96125742751564	4.1074931549618	0.00253604385983012	0.0227384271500023	-2.12496768190214
TGGT1_261650	0.356134370407369	5.39697590234337	3.97594342392328	0.00309849409448625	0.0259225594741873	-2.12543495706416
TGGT1_231992	-0.358086607760354	5.71388343189455	-4.00808968954929	0.00294983214575044	0.0251375410982971	-2.12654816696114
TGGT1_224730	-0.408699038589482	5.56471533165418	-3.99043343928151	0.00303052615253326	0.0256661679199153	-2.12758866756557
TGGT1_308880	0.280876534925009	6.41075900324672	4.06325815703169	0.00271202771493587	0.0236682926340279	-2.14133394334636
TGGT1_294270	0.57167715377864	4.88915263095275	3.89613806225585	0.0035028670446641	0.0281087709056651	-2.1485195324353
TGGT1_244000	0.287433139866148	6.67604924781316	4.07640765699673	0.00265840007946154	0.0233484257298301	-2.15046334586623
TGGT1_299250	0.417302254561586	5.58462160700916	3.97769115538861	0.00309021121632697	0.0258931356550894	-2.15664088645144
TGGT1_410890	0.912190964368614	2.2420682192488	3.54628917851557	0.00605586077554542	0.0395500043242411	-2.15706816170764
TGGT1_289380	0.247097604872314	8.64855236306712	4.13404721089062	0.00243625292748029	0.0223090697500426	-2.15794091819036
TGGT1_314362	0.741885747362922	2.56767156990155	3.57629379174656	0.00577468756734753	0.0383325544407809	-2.1617997775938
TGGT1_314240	0.345416950307571	7.29632401381504	4.0952899892507	0.00258334953152557	0.0228998825165214	-2.16305759684089
TGGT1_207370	0.327276601816188	8.05497920403306	4.11087203840023	0.00252310862417478	0.0227114443397078	-2.16953337297077
TGGT1_213930	0.407650949203965	5.22604743801343	3.92128575629767	0.00336974204777479	0.0275986814590273	-2.1791047929085
TGGT1_268570	-0.273869282018656	6.51951591199415	-4.0442633355655	0.00279152750474444	0.0242390589016762	-2.18209070532655
TGGT1_310060	-0.313730779385723	5.9638572503642	-3.99760128139421	0.00299748896323309	0.0254805087764573	-2.18407282902997
TGGT1_316390	-0.725926674508853	3.79252945078206	-3.70985790148172	0.00467936968819108	0.0338380918461515	-2.18451735064673
TGGT1_207980	0.434201655086388	4.05692393124342	3.75444381840815	0.00436424944530119	0.0324464253354987	-2.18560759801225
TGGT1_295760	-0.480755558930996	5.53732568909727	-3.94987371617356	0.00322487060466662	0.0266555710916976	-2.18585480662103
TGGT1_262933	-0.381792687333042	6.30240286567413	-4.02119155966856	0.00289142432031842	0.0248243758437326	-2.19211279624085
TGGT1_207665	-0.515108173444932	3.46241723444124	-3.66056062138712	0.00505580523204955	0.0351554828926236	-2.19568405292278
TGGT1_229140	-0.3766043853389	7.9176258793772	-4.09014798595898	0.00260356194841678	0.0229253463754957	-2.19693359811022
TGGT1_251660	-0.6450592063761	3.34228194912729	-3.63854482420457	0.00523406593801598	0.0359587127429929	-2.20332224958004
TGGT1_202610	0.237524570860115	8.38888747576563	4.09451861512445	0.00258637104530983	0.0228998825165214	-2.21019688896688
TGGT1_221160	0.318604049023101	5.86843117613844	3.97326253445367	0.0031112450782577	0.0259820925648613	-2.21153616069731
TGGT1_265410	0.341858137282448	6.33506259994212	4.01184035014101	0.00293298526697979	0.0250560741379131	-2.21380640492835
TGGT1_293240	0.337753095471105	6.57771853136418	4.02689887231161	0.00286636525482017	0.0246708308603232	-2.21866009535282
TGGT1_234490	0.472450420339748	6.7488295419833	4.03365225459902	0.00283700994336344	0.0244794446430494	-2.22443576794635
TGGT1_207910	0.452725474989244	5.8134935781729	3.955952641555	0.00319492270640076	0.0265356080337174	-2.22950844187236
TGGT1_285780	0.405159346341462	6.14348764099906	3.98111957068562	0.00307403117158361	0.0258931356550894	-2.23773269675585
TGGT1_230150	0.607604122990719	8.22672100276194	4.07134032915687	0.00267893185711983	0.0234688081291886	-2.23996677718694
TGGT1_251890	0.412907615715777	6.16184778601455	3.98013925203533	0.00307864851333571	0.0258931356550894	-2.24175404857575
TGGT1_275370	-0.532386780201397	4.61456912678174	-3.79222409050558	0.00411471087532419	0.0310613245769533	-2.24692935149147
TGGT1_267750	0.500513544295445	6.92822997639638	4.02850646912855	0.00285934837285489	0.0246412766417582	-2.24713339077956
TGGT1_409720	-0.390273410594425	5.3119804392167	-3.88589597262097	0.00355866722672209	0.0282924329689801	-2.24892398594853
TGGT1_275870	0.616197321276241	3.40305192386817	3.61584540501305	0.00542478012337708	0.0368433088588112	-2.25725535277778
TGGT1_260200	-0.358460196943662	7.3780320314609	-4.03747806675209	0.00282052148398012	0.0244249926148382	-2.25823609132257
TGGT1_290670	-0.260418561765304	8.47222002970913	-4.06541293782555	0.00270316191088241	0.023620895122158	-2.25971279734297
TGGT1_233210	0.972954020539257	2.17802646637464	3.47250664039494	0.00680989975212134	0.0427651767676505	-2.26154926425268
TGGT1_253580	0.920906293382291	2.52937638296827	3.50590416838432	0.00645710987286566	0.0412690934904248	-2.26331731980082
TGGT1_214620	-0.312350274057332	6.59716072203402	-3.99822941130103	0.00299461207706915	0.0254805087764573	-2.26367917853937
TGGT1_229760	0.499163303714396	3.34370740229247	3.60385207314355	0.00552847334478344	0.037273834502035	-2.26506408162679
TGGT1_278740	-0.524360429138437	3.79578573170261	-3.65626004028349	0.00509011934185758	0.03528704709068	-2.27506684768698
TGGT1_310300	0.318360266148207	5.59150465653319	3.90465297375104	0.00345718007164844	0.0278070495353524	-2.27561233829308
TGGT1_256910	0.273864832409722	6.08797688383005	3.95105560384509	0.00321902486433822	0.0266555710916976	-2.27901308604977
TGGT1_313290	-0.342368788394332	6.46541072663601	-3.97747973861504	0.0030912119198529	0.0258931356550894	-2.28199449968399
TGGT1_255195	-0.409293930553533	5.76657230594538	-3.91295004251806	0.00341326690523514	0.0276913423084531	-2.28652767064707
TGGT1_242880	0.377375788243922	5.28972401883915	3.85832524627812	0.00371358880343974	0.0291201256570754	-2.29289867281179
TGGT1_270840	0.356076910938111	6.73837486904153	3.98959287765243	0.00303442553687428	0.025667582308837	-2.29483105373693
TGGT1_260340	0.413286600109066	4.25271182140942	3.70899733019999	0.00468568221127513	0.0338481476543478	-2.30486632077712
TGGT1_220250	-0.347372923623456	5.94511538106856	-3.91937975884441	0.00337964222900962	0.0276030874214954	-2.30604514871627
TGGT1_205460	-0.3747201953342	5.36914024634327	-3.85525383247851	0.00373128263518292	0.0292118520896134	-2.30920351207625
TGGT1_308060	-0.345340495344072	6.133759431111	-3.92995438173746	0.00332510026435704	0.0273525293277313	-2.31644566800531
TGGT1_217720	-0.761883954869188	3.5875727589023	-3.59662305024234	0.00559197635945489	0.0374899712445102	-2.3184346961109
TGGT1_293220	0.401720197125067	6.32202498553722	3.94321401490494	0.00325802063061389	0.0268972483514187	-2.32182245631166
TGGT1_276100	-0.43579197527357	5.53234032834626	-3.86349637656106	0.00368399857390897	0.0289210709963151	-2.32438484615376
TGGT1_258080	0.266270822576631	6.46301102581354	3.95269240285029	0.00321094757772148	0.0266365337659718	-2.32442177590929
TGGT1_209970	0.300718860587339	7.42706284795771	3.99515984497144	0.00300869874703925	0.025544223806653	-2.32870294187994
TGGT1_288390	0.451930143418372	4.56988485509433	3.73969832058766	0.00446592054833602	0.0329176158744982	-2.33015335258856
TGGT1_204270	-0.349293850379122	6.1815360651552	-3.92492030175442	0.003350948216992	0.0274993686017351	-2.33095998881423
TGGT1_258200	0.990992983751603	1.62437154253116	3.38138491014317	0.00787853806674389	0.0471136576391284	-2.33097311542174
TGGT1_292935	1.38131053765178	2.95390605422916	3.49479613429177	0.00657227943577717	0.041888383391881	-2.3462817117817
TGGT1_298990	0.315954465852885	6.1903149391743	3.91604260314799	0.00339705023775335	0.0276207865277791	-2.34880970654346
TGGT1_320525	-0.446461373154292	4.22906563672808	-3.6726085134772	0.0049609625576251	0.0347937857715927	-2.35156228287423
TGGT1_203200	1.00969336942606	2.0865615909322	3.40559138236004	0.00757862969373502	0.0459940338753741	-2.35199158641907
TGGT1_285830	0.313794439599735	7.37034717043789	3.97903631012085	0.00308385218751071	0.0258931356550894	-2.35212668629696
TGGT1_273445	0.290242730332453	6.35406031499225	3.92633540829903	0.0033436608388523	0.0274723483737004	-2.35335359572337
TGGT1_314920	0.431787139633495	5.52839407807765	3.8485246308976	0.00377035985772655	0.0293544109340663	-2.35350826873232
TGGT1_244630	0.371161271542513	5.50241069161926	3.84537166249709	0.00378881777779618	0.0294082391172735	-2.35434841511173
TGGT1_221675B	-0.282106921949644	6.54591355927746	-3.93841677354221	0.00328212294655124	0.02706374041179	-2.35437547041582
TGGT1_285860	-0.384778545279669	5.76589861145142	-3.86971588875675	0.00364873847093781	0.0287426969812592	-2.35657553845697
TGGT1_249760	0.337379932386097	5.34135894067812	3.82487110724162	0.00391117861980901	0.0300863259154659	-2.35694761237461
TGGT1_228370	-0.477507739153246	5.0664009113864	-3.78516913012243	0.00416014232166852	0.031333005273198	-2.35912003773305
TGGT1_315210	-0.236075166994896	9.57790303838624	-4.02295598046539	0.00288365260970313	0.0247885987461606	-2.36527052088803
TGGT1_363590	0.541468224887529	5.47610412090665	3.82955882597946	0.00388283647496104	0.029935276276129	-2.37334361099494
TGGT1_214850	0.618108074862482	5.51108957920656	3.83040318773237	0.00387775448034919	0.0299296493393506	-2.37696949848641
TGGT1_208040	0.312519639412392	6.3918147050999	3.91269501333773	0.00341460786354053	0.0276913423084531	-2.37993102416626
TGGT1_259670	-0.397007923826724	4.55386050557595	-3.70124043562807	0.00474298665490048	0.033958997284114	-2.38308427205684
TGGT1_288710	0.31209899628544	5.45084004442682	3.82147984802932	0.00393181821020212	0.0301775824012946	-2.38356178353032
TGGT1_278815	-0.286274090496538	7.38058500922459	-3.95663237064342	0.00319159233607594	0.0265356080337174	-2.38812893474826
TGGT1_270190	-0.428875032309197	6.13001147512453	-3.88249657841154	0.00357739432627688	0.028323203341616	-2.39099086778434
TGGT1_202420	-0.529725644030174	4.40855226026807	-3.67230701729544	0.00496331304957575	0.0347937857715927	-2.39178667600617
TGGT1_242790B	-0.355824040268543	6.67258417976826	-3.92102851952928	0.00337107640331292	0.0275986814590273	-2.39472488768612
TGGT1_255400	-0.340851228708684	5.42897305963036	-3.8080801183827	0.00401450012119921	0.0304720941870717	-2.39674856707674
TGGT1_284050	0.317643453844588	6.38939941074993	3.89481256650613	0.00351003617551664	0.0281317621351204	-2.408416931269
TGGT1_220360	-0.39424810101686	6.31747164573646	-3.87454343196895	0.00362161535630515	0.0285617532170992	-2.42902456157954
TGGT1_299015	-0.367782735752544	5.50070936079482	-3.7953908055253	0.00409448854435687	0.0309426348566398	-2.4299172358473
TGGT1_231215	-0.402582117262258	5.04855204983488	-3.73714547554531	0.00448377412102093	0.0329432848613899	-2.43495251768078
TGGT1_263230	0.288542443122917	7.2155515867109	3.91816403811215	0.00338597300324073	0.0276119078210578	-2.44297007082058
TGGT1_268750	-0.343300117207626	4.70891090354311	-3.68600527071621	0.00485769125304605	0.0343738625550829	-2.44435096518122
TGGT1_260825	-0.383248511972793	5.39437903632543	-3.77162068381207	0.0042488771179749	0.0317934854721818	-2.44861226474443
TGGT1_216850	-0.530837701997124	3.51077854439276	-3.50743474111155	0.00644140678134118	0.041245395191139	-2.44982410062438
TGGT1_260170	0.316185545360272	5.76825346120235	3.81486599266881	0.0039724018429569	0.0303073039249115	-2.45043125359281
TGGT1_314000	-0.339657139149854	5.47907586604533	-3.77888601104568	0.00420104815204103	0.0315399652200722	-2.45314184913001
TGGT1_260300	0.514238798840781	3.72312828201773	3.5333626338618	0.006181377003167	0.0400432244717456	-2.4611020453908
TGGT1_214990	0.354751003527007	6.80015675586477	3.88871022544048	0.00354324194297437	0.0282678362434278	-2.46271686902637
TGGT1_306895	-0.412126907154597	6.22330034362279	-3.84462555439707	0.00379319952729035	0.0294090565379658	-2.46510893034724
TGGT1_213388	0.351719636130843	6.22243038835848	3.84555009471267	0.00378777067081389	0.0294082391172735	-2.46648057420705
TGGT1_281650	-0.351640780682146	6.1490206411025	-3.83700139407467	0.00383828228044063	0.0296916391930148	-2.46814355164453
TGGT1_207480	0.343638061498482	6.76291759980905	3.88313861972454	0.00357384939958484	0.028323203341616	-2.46839509157981
TGGT1_223095	0.631723551751098	3.55551178748494	3.50410025992041	0.00647566865698614	0.0413492788803098	-2.46855720855249
TGGT1_320030	-0.307993583875171	6.87727991208346	-3.88717552665277	0.00355164505581546	0.0282692859361608	-2.46894071053107
TGGT1_306310	0.434337842655023	7.46708829798503	3.90813122626897	0.0034386988286864	0.027793526951968	-2.47009785652888
TGGT1_312130	0.404326762782133	5.14831041941176	3.722807258864	0.00458545437809504	0.0334757640744794	-2.48296075327517
TGGT1_273400	-0.379062663756155	5.03084429413113	-3.70512543497961	0.00471419452793971	0.0339266168360913	-2.48356788887264
TGGT1_304690	0.569745291140102	3.75314945926542	3.52118257244168	0.0063021358955665	0.0405803263612461	-2.48668337435223
TGGT1_215550	0.692057230010357	5.65356284285733	3.77600537096838	0.0042199437559356	0.0316472772187232	-2.48864492615945
TGGT1_266290	0.514656686495821	3.8005126332453	3.52318800170679	0.00628208471952978	0.0405266899887701	-2.49523043400715
TGGT1_214750	0.31009362632846	7.54638780499264	3.89159504804954	0.00352750309675816	0.0281749579516909	-2.50012498370705
TGGT1_233470	0.421948505793182	7.66222544882137	3.89348242789954	0.00351724599269282	0.0281317621351204	-2.50158494184366
TGGT1_236840	0.293375172553297	6.09327663127581	3.81269431465625	0.00398582367536793	0.0303213599729041	-2.50253430384949
TGGT1_227850	0.354749054341379	5.13258915545724	3.70454158378439	0.0047185097550306	0.0339266168360913	-2.50974523664341
TGGT1_214080	-0.501244126478242	8.61678142476984	-3.90623959474179	0.00344873678943348	0.0278070495353524	-2.52050069015502
TGGT1_310250	0.342188176663809	4.73737906739477	3.64363984146163	0.00519223349496868	0.0357069897448996	-2.52473276743281
TGGT1_265180	0.347748528550118	4.9516878280538	3.67162192102909	0.00496865847150306	0.0347957885015545	-2.52602218676888
TGGT1_297720	0.236918938210469	7.80286146922214	3.88071529906098	0.00358724881642395	0.028323203341616	-2.52790510149984
TGGT1_297925	-0.469167988196447	4.75426891530987	-3.63653951252967	0.00525062730100026	0.0360005622621922	-2.53130515057451
TGGT1_201770	0.33192214610276	6.36580787742608	3.81599504309565	0.00396544268858812	0.0303073039249115	-2.532730603789
TGGT1_300190	-0.236477769941692	9.47427405863577	-3.91588496983584	0.00339787485858676	0.0276207865277791	-2.53460345881262
TGGT1_201800	-0.279386375736087	6.2369182080354	-3.80349814453935	0.00404319149969533	0.0306222774707102	-2.53484636767733
TGGT1_244280	-0.302326506701692	9.14529256618792	-3.9053566431107	0.00345343276954779	0.0278070495353524	-2.5415413064093
TGGT1_252310	-0.401898918100307	5.00932916758409	-3.66354965984209	0.00503209893605178	0.0350971038369454	-2.54588743382011
TGGT1_208340	-0.258396921118707	6.92129681846902	-3.83516345918568	0.00384923454194351	0.0297429055561186	-2.55729848836531
TGGT1_285980A	-0.365469564706428	7.64573736291769	-3.85482123555282	0.00373378187971065	0.0292118520896134	-2.56349459857266
TGGT1_316340	-0.287865474044883	9.55907315776297	-3.89773770083041	0.00349423575539691	0.0280722655255427	-2.56616284545173
TGGT1_258828	-0.561782345486459	3.48820043115236	-3.43159439170124	0.00726967790978545	0.0449067835662698	-2.56635946796439
TGGT1_294050	0.274213959114458	6.08607352825261	3.77095182021425	0.00425330909326846	0.0317934854721818	-2.56924117023209
TGGT1_269060	0.278065260128876	5.68853929759476	3.73306331494758	0.00451247927585794	0.0331188046745731	-2.56980118558955
TGGT1_313700	0.337832970973971	5.31589810806944	3.69003374355705	0.00482708051891282	0.0343286791401897	-2.57011010134191
TGGT1_310710	0.457652243977231	5.37092125984549	3.69583745062458	0.00478333627363473	0.0341588821950011	-2.57078752441855
TGGT1_246730	0.278574788576418	6.54847939563262	3.80551656342953	0.00403052604304081	0.030560008377058	-2.5718272899738
TGGT1_217520	-0.411715754382739	7.87085567013563	-3.85193605887016	0.00375049565131292	0.0292428101973684	-2.57759588514556
TGGT1_214430	0.654007293601221	4.4732570625769	3.56689477490352	0.00586126554939146	0.0387203873037129	-2.58305207295616
TGGT1_310200	0.44426025067629	5.62551054787514	3.71712283714874	0.00462643433349517	0.0336342894511195	-2.58340360736164
TGGT1_318330	0.340131820015004	5.36628564153896	3.6867322263887	0.00485215237004444	0.0343738625550829	-2.5852814622079
TGGT1_311880	-0.238036683862515	8.11842908705732	-3.85313681829469	0.00374353010848122	0.0292216305970776	-2.58585304464698
TGGT1_249240	-0.281496008225043	9.47487199560069	-3.88126534204235	0.00358420278474343	0.028323203341616	-2.59048753766307
TGGT1_255245	0.389608403311845	4.36787642792293	3.54508474487396	0.00606744232456129	0.0395580015118679	-2.59726004796985
TGGT1_212920	-0.309197358002355	5.37545045867933	-3.6765330203478	0.00493047314359176	0.0347050806637467	-2.60033293617387
TGGT1_244040	0.415905597671797	6.4168945054705	3.77519384404194	0.00422528311878638	0.0316528017515185	-2.60485607409889
TGGT1_312840	-0.376569831198646	6.59471906650363	-3.78451688006543	0.00416436917546939	0.031333005273198	-2.60699632284712
TGGT1_217430	-0.28637701652295	5.69249557866955	-3.70791980153887	0.004693598796823	0.0338697575296451	-2.60756719366191
TGGT1_308940	-0.437122797306294	5.69133360051661	-3.70566940859024	0.00471017776687678	0.0339266168360913	-2.60808661581062
TGGT1_239290	-0.347545159343605	5.48826515864476	-3.68355435145444	0.00487641449880463	0.0344302900495682	-2.60930707440033
TGGT1_255340	0.252488504990673	7.19105117403789	3.81441878507827	0.00397516186422425	0.0303073039249115	-2.60953537848694
TGGT1_246190	-0.521665194205001	5.73855406630317	-3.70417630640222	0.00472121162020348	0.0339266168360913	-2.61651025613808
TGGT1_235920	0.229216792813433	7.88897138579494	3.82732770396525	0.00389629883660463	0.0300054278827884	-2.61784955717074
TGGT1_310030	-0.287984096184303	8.73210878538339	-3.84801346721127	0.0037733458289537	0.0293544109340663	-2.61975586167927
TGGT1_288045	-0.390705087390388	5.00870177674716	-3.61557267909442	0.00542711529358379	0.0368433088588112	-2.62394961334471
TGGT1_278470	0.303124708676421	6.24575439726484	3.75003488177204	0.00439439161958685	0.0325894647702163	-2.62444095354873
TGGT1_217820	0.285195789659336	7.51229106186197	3.8130011300155	0.00398392453938691	0.0303213599729041	-2.62597705085829
TGGT1_314260	-0.287507463137579	7.93811737280699	-3.81966218696598	0.0039429279278767	0.0302291141137214	-2.63253961885153
TGGT1_257040	-0.256783213783225	7.55202106008848	-3.80907178722078	0.00400831877971734	0.0304587936443273	-2.63385000385375
TGGT1_319695	-0.582224094593656	3.33138876203614	-3.36731954257969	0.00805845298341805	0.0475282857349622	-2.63501347100243
TGGT1_307980	0.321009158785728	5.62500892186233	3.68525376049621	0.00486342420620847	0.0343738625550829	-2.63612777752227
TGGT1_219730	-0.317291054396362	7.98482559500386	-3.81777015327852	0.00395452736785866	0.0302842814128775	-2.63755130651897
TGGT1_278700	-0.333748405122824	5.99896795933371	-3.71858875717466	0.00461582956072311	0.0336335763823269	-2.63891836365528
TGGT1_297970	0.425210659418897	6.39758585092505	3.75165456825445	0.00438329308254202	0.0325528148257467	-2.64068002105592
TGGT1_244200	-0.279166426313808	7.63767229912994	-3.80129973037733	0.00405703413396046	0.0306933154447151	-2.64997846528857
TGGT1_216010	0.260648742835441	6.01994266842201	3.71533565499617	0.00463939784123439	0.0336552098672668	-2.65040712997258
TGGT1_205658	1.10835323400549	3.22671925051141	3.3413035785486	0.00840258482129912	0.0488871199797581	-2.65049403593108
TGGT1_294960	0.32866323468363	6.05060588758347	3.71708170379086	0.0046267322699955	0.0336342894511195	-2.65160005157942
TGGT1_242030	0.323110271830122	6.61403944988037	3.76065333031937	0.004322165899232	0.0322031797280806	-2.65186555218056
TGGT1_289200	0.382204273983846	4.92698355407636	3.58746881095024	0.00567348986473325	0.0378067730617932	-2.65722880343364
TGGT1_259720	0.405102631212105	6.44755212417853	3.74306852137701	0.00444246516050862	0.0328150729418021	-2.66085863828796
TGGT1_363030	-0.226105889554823	10.7371032820215	-3.85401981039113	0.00373841662452949	0.029214876280556	-2.66135299125426
TGGT1_247330	0.331296823423437	6.78348758547925	3.75863741362913	0.0043357813011806	0.0322696623465573	-2.67208260182643
TGGT1_258790	-0.272787479599379	7.04050234510829	-3.76861457920892	0.004268834201183	0.0318748890353263	-2.67381730400327
TGGT1_309265	0.358694646883477	5.10570783909204	3.59648009112253	0.00559323985704049	0.0374899712445102	-2.67989315909091
TGGT1_220120	-0.418820924706951	4.08378459343788	-3.44799441676881	0.00708160019111497	0.0440725470717626	-2.68030801366843
TGGT1_262520	0.397722084532556	4.81698596546547	3.55778508960098	0.00594647589311622	0.0391329327435026	-2.68155303673742
TGGT1_265380	0.386245042463145	4.74074173980461	3.54479440378749	0.00607023764064722	0.0395580015118679	-2.68575407082615
TGGT1_263505	-0.433764657843784	6.89125078021979	-3.7495520438284	0.00439770587563774	0.0325894647702163	-2.69116970031566
TGGT1_253080	0.358089432649548	5.24969395705214	3.59364099309704	0.00561839435354212	0.0375143771454853	-2.7138047682572
TGGT1_273350	-0.732078059025837	5.29534045742438	-3.59043797017677	0.00564691558282432	0.037666186676123	-2.71478527349044
TGGT1_311905	0.367679106508155	5.14971610548981	3.5790694243435	0.00574937705970239	0.0382014164633559	-2.71713341947023
TGGT1_202770	-0.333149413681183	8.53936972474004	-3.78231910673966	0.00417864499084539	0.0314060563956762	-2.71861020425184
TGGT1_264472	0.406090245748629	4.79888596757305	3.53052661872274	0.00620927680176177	0.0401327035392064	-2.72192750560663
TGGT1_312560	0.473478480787955	6.0690908993298	3.67263700148377	0.00496074052295048	0.0347937857715927	-2.72563172438297
TGGT1_213310	0.488992946073565	5.63191775044574	3.62800320421145	0.00532174393049943	0.0364155552338752	-2.72905340332277
TGGT1_248720	0.369383123829842	7.47210436234466	3.746435756994	0.00441915979012787	0.0327131990061457	-2.73246845136045
TGGT1_248380	-0.426079304650163	4.5766310121858	-3.48391013814902	0.00668723026352311	0.0423073436267235	-2.73999690821105
TGGT1_309290	-0.34444737451486	5.10834043732933	-3.55625514774877	0.00596091338900568	0.0391350325076205	-2.74271511553438
TGGT1_266400	0.349213368734779	6.23641513276899	3.67504517935517	0.00494200892721522	0.0347507110352342	-2.74517323041051
TGGT1_308075	-0.556763961014908	5.76691330432877	-3.62331204307393	0.00536125579705954	0.0366130646637323	-2.75232975499166
TGGT1_235750	0.308140399267463	5.49135866762048	3.59857530639689	0.0055747518763416	0.0374390318882824	-2.7530064576701
TGGT1_279540	-0.435999227171619	5.27053853098338	-3.5670312035125	0.00585999917920561	0.0387203873037129	-2.75623592572973
TGGT1_240630	-0.510039012743508	8.02472659421291	-3.74500540163729	0.0044290438385337	0.0327511123415013	-2.75764158596171
TGGT1_298010	-0.265319564944846	7.79128165978229	-3.73775718505808	0.00447948924242499	0.0329432848613899	-2.75966807741367
TGGT1_269690	0.238481609592703	7.89074390093525	3.73812393969985	0.00447692227940036	0.0329432848613899	-2.76295376716134
TGGT1_235730	0.312159057165131	5.54479047362999	3.59488268905337	0.00560737833658488	0.0375143771454853	-2.76904690532114
TGGT1_313780	-0.309785683656083	7.24069022475911	-3.71583787249453	0.00463575110255419	0.0336552098672668	-2.77131253047856
TGGT1_232020	-0.306928899852049	7.66924595635202	-3.72749756730409	0.00455192854811505	0.0332663258505709	-2.77136144175591
TGGT1_226910	0.451142425840946	6.91095733620694	3.70090652844543	0.00474546988367508	0.033958997284114	-2.77567510126982
TGGT1_242780	0.34158514054181	7.85406290741822	3.72925054880646	0.00453946467344868	0.0332631577098129	-2.77595639003581
TGGT1_313770	0.333278478127078	5.22633152853473	3.5505284650889	0.0060152804431735	0.0393597370196995	-2.77956744281752
TGGT1_313690	0.302586588218469	6.79347115151617	3.69181998216283	0.00481357251950826	0.0342680519841183	-2.78201772191101
TGGT1_262900	-0.650720235546319	4.72127574076253	-3.47276957758982	0.00680704498542183	0.0427651767676505	-2.78449751173929
TGGT1_319950	0.297627110081255	5.80678333846867	3.61162853505919	0.00546100443855214	0.0369639050432313	-2.78715262590585
TGGT1_297890	0.261210284528388	6.77942063038593	3.68550004731774	0.00486154460589875	0.0343738625550829	-2.79123656477865
TGGT1_203930	-0.288678207761944	7.86678807131618	-3.71844717049497	0.00461685271265328	0.0336335763823269	-2.79429142582901
TGGT1_221270	-0.410638253469618	6.49985193543433	-3.6611508122405	0.00505111511119845	0.0351554828926236	-2.79710927436537
TGGT1_313380	-0.253994576543487	9.91912659353587	-3.76077577853385	0.00432134034089363	0.0322031797280806	-2.79745048744639
TGGT1_288010	-0.32515972824013	6.03195965760148	-3.62190397624054	0.00537317534018508	0.0366580623159254	-2.80162521199057
TGGT1_268960	0.255743972546592	6.82346135360334	3.67945953030385	0.00490786525649769	0.0345813415665313	-2.80505861506413
TGGT1_267450	-0.332132741742715	7.16610615358427	-3.68756931166702	0.00484578259455533	0.0343738625550829	-2.81315767430226
TGGT1_246490	-0.361543284207456	7.46910942048053	-3.69628076148074	0.00478001207550525	0.0341588821950011	-2.81380396203741
TGGT1_222380	0.256950210668972	7.87707742559171	3.70202014427658	0.00473719336801259	0.033958997284114	-2.82130687282053
TGGT1_324600	-0.307505859449238	9.59626205418735	-3.73982055093845	0.00446506759638539	0.0329176158744982	-2.82356868826479
TGGT1_202540	0.285920332953766	8.28245273772147	3.71026901054983	0.00467635724743459	0.0338380918461515	-2.82560490576522
TGGT1_218600	0.311070266083081	6.13263975638894	3.61739308304841	0.00541154832345829	0.036810304471239	-2.82572106040852
TGGT1_269885B	-0.283315323291709	6.63852747143283	-3.6527229553458	0.00511852472625267	0.035395616060408	-2.82768827772045
TGGT1_238380	-0.230324638619096	8.36994435269154	-3.71017875435742	0.00467701843359042	0.0338380918461515	-2.82925289603632
TGGT1_228400	-0.241865195940147	6.6682524881957	-3.65277668673771	0.00511809198167224	0.035395616060408	-2.8311991476129
TGGT1_312950	-0.274863013467466	6.42045014087623	-3.63546387049074	0.00525953339886692	0.0360257083506054	-2.83147797007824
TGGT1_232815	0.327268384946004	5.36492664105249	3.53170152826027	0.00619770247762523	0.040095578493536	-2.8380296765686
TGGT1_313660	0.357582128181683	5.02885523615927	3.48860290481291	0.00663742154084269	0.0420932534787573	-2.84040059082769
TGGT1_262950	-0.312251795778092	7.80747491954771	-3.68740408232609	0.00484703920618125	0.0343738625550829	-2.84257139640562
TGGT1_291310	0.260317461315463	6.31458450909011	3.61799891247443	0.00540637803226372	0.036810304471239	-2.84885183892944
TGGT1_227275	-0.400108143781128	4.24912937360758	-3.36848327573268	0.00804340632818981	0.0475282857349622	-2.85021945702862
TGGT1_252380	0.311202046298982	7.35212385075221	3.6638558466854	0.00502967714155602	0.0350971038369454	-2.8622412496791
TGGT1_244120	0.347221786879693	6.31907917264851	3.60876362331357	0.00548575956934218	0.0370902164820342	-2.86430378214345
TGGT1_235690	-0.278728384056228	8.85936218838525	-3.69504063482618	0.00478931736154927	0.034166115659102	-2.87353267816539
TGGT1_363340	-0.624126721710416	4.43906572909865	-3.37739194692088	0.00792918446098452	0.047252167710737	-2.87475791097226
TGGT1_299180	-0.610377529784707	4.14575608580111	-3.33182972647255	0.00853166713614959	0.049263035176575	-2.87983346860972
TGGT1_320040	-0.413179353933637	4.1653470312349	-3.33724343813484	0.00845765435701226	0.0490002434820331	-2.88081928327287
TGGT1_321370	-0.274098889725803	5.79959894457519	-3.54925153645366	0.0060274737400171	0.0394020312833628	-2.88507203438354
TGGT1_257430	-0.337901955969169	7.64904137649221	-3.65673516615248	0.0050863163557273	0.03528704709068	-2.88613618926635
TGGT1_251880	0.24347391981488	7.55468420349725	3.64943625582967	0.00514506845642061	0.0354645689548729	-2.89434677189005
TGGT1_280480	-0.255144036289093	6.40499608114823	-3.59379700970496	0.00561700896847593	0.0375143771454853	-2.89805431090548
TGGT1_252200	-0.316331300706353	6.59524168888443	-3.60557443234102	0.00551345513183011	0.0372090588239408	-2.8998386434605
TGGT1_258470	-0.366105454218366	10.3397980628601	-3.70157337313868	0.00474051199691995	0.033958997284114	-2.90258986541
TGGT1_277910	-0.294293017178468	6.73151858174632	-3.60822206308465	0.00549045228714712	0.0370902164820342	-2.90976537250072
TGGT1_309390	0.369183437790998	4.48993649704864	3.37166875188658	0.0080023685899589	0.047523565451768	-2.90980427189873
TGGT1_205490	-0.229549463309336	8.21413840965288	-3.65238826098849	0.00512122116912985	0.035395616060408	-2.9170148289031
TGGT1_316235	0.412829527753776	4.36929605808094	3.34854533382222	0.00830528495901825	0.0485136655586342	-2.91783735280976
TGGT1_249325	0.404731685589901	4.41168691814971	3.35418244328889	0.0082303562632451	0.0481293877740957	-2.91890811625392
TGGT1_273090	-0.261727828029529	8.86170332835275	-3.663642619877	0.00503136353634488	0.0350971038369454	-2.92502830828868
TGGT1_289980	-0.296759921264576	6.75253809090423	-3.59881868556748	0.00557260847647478	0.0374390318882824	-2.92721764626901
TGGT1_263690	0.444285097805572	5.16034636691014	3.44886686893799	0.00707173807654849	0.0440725470717626	-2.93186372600612
TGGT1_203390	-0.29062957785017	7.4548148987951	-3.62363493426004	0.00535852637413997	0.0366130646637323	-2.93223648611432
TGGT1_211400	0.490069690840612	5.19859833504162	3.45298719484018	0.00702535555204831	0.0438415336945883	-2.93258851762673
TGGT1_254830	0.569358791131286	4.86170718178878	3.40857162927031	0.00754253644685465	0.0459433331665362	-2.93293015362028
TGGT1_260180	0.219014091773446	7.34873928371323	3.61944561889368	0.00539405243761776	0.0367640224117912	-2.93494422502247
TGGT1_289180	-0.344481541313279	4.9816191075506	-3.42229871222502	0.00737858775088879	0.0453607107690796	-2.93500752055394
TGGT1_309210	-0.22102201359017	8.56964061480056	-3.64945246862238	0.00514493716628197	0.0354645689548729	-2.93708231700406
TGGT1_264990	-0.272578387085958	8.47886718148298	-3.64597015366625	0.00517321760049098	0.0356118292678443	-2.93889121858439
TGGT1_255895	-0.470817143690072	5.42258036375703	-3.46866675159663	0.00685173296286316	0.0429138138302459	-2.94600900779616
TGGT1_289880	-0.302721654869849	7.52693554491883	-3.61478637603477	0.00543385378325761	0.0368526750172215	-2.94981849964722
TGGT1_312430	0.346000566857304	6.12208827502564	3.53998458219017	0.00611674169628375	0.0397588210258443	-2.95099996565391
TGGT1_231000	-0.348566725918075	6.39544770001307	-3.55957502719628	0.00592963135733868	0.0390594586632358	-2.9520713025365
TGGT1_237180	-0.370348884006649	6.77759869634745	-3.58221050282314	0.00572087418861436	0.0380487928385889	-2.95571859014491
TGGT1_254440	0.213935067286421	10.1217960134011	3.66504735106338	0.00502026453855234	0.0350971038369454	-2.95846582033764
TGGT1_224710	0.628209480040615	5.00510207801739	3.40961071019349	0.00752999446191088	0.0459286749160631	-2.96103674791132
TGGT1_207040	0.567990575175339	5.12094778861401	3.41527649705522	0.007461988114298	0.0457362676132151	-2.97738340023097
TGGT1_249780	-0.286121695289258	6.39665115406152	-3.54258056977846	0.00609159611775419	0.0396328349118218	-2.9808233068019
TGGT1_299060	-0.226830319241208	7.45189501741321	-3.5936064376764	0.00561870124470698	0.0375143771454853	-2.98148599071199
TGGT1_292035	0.369698110431621	5.39745376082572	3.44189087647889	0.00715099649969884	0.0443439160761307	-2.99164660499499
TGGT1_248460	-0.313977634165172	6.0346777022064	-3.50622118755062	0.00645385409554906	0.0412690934904248	-2.99195181071577
TGGT1_237090	-0.299222316614345	8.48302276809203	-3.6126863156575	0.005451893990564	0.0369385960326193	-2.99360672237119
TGGT1_208310	-0.428386153343018	5.5636368878274	-3.45373311800999	0.00701699267763706	0.0438291177512353	-2.99734580737669
TGGT1_224070	-0.34634672395206	6.21641411306939	-3.51437451189094	0.006370706498906	0.0409451856009126	-3.00356128682579
TGGT1_213870	-0.280680544441615	7.02881515489951	-3.5634371096276	0.00589345643433856	0.0388956812849772	-3.00845409136304
TGGT1_231790	-0.268550571321164	6.53409606607814	-3.53311711227536	0.00618378717303967	0.0400432244717456	-3.01266178580711
TGGT1_295850	-0.462726806839822	7.43094843043363	-3.57249268401442	0.00580953866180299	0.0385267091390735	-3.01467048845329
TGGT1_215250	0.259318392641874	6.22643633212071	3.50822394440865	0.00643332545624964	0.0412320402261219	-3.01760012529884
TGGT1_205300	0.27045261204464	6.0321353360446	3.49014742535064	0.0066211129760848	0.0420437617142522	-3.02074613845685
TGGT1_236010	-0.242561332627921	7.21725785774494	-3.56280896184671	0.00589932433183729	0.0388970790316827	-3.02114183029927
TGGT1_246720	-0.271698280674712	6.5059455037681	-3.52260438641288	0.0062879130751807	0.0405266899887701	-3.02674530725613
TGGT1_257180	0.287498616866601	7.17676560909528	3.55594262047991	0.00596386710309529	0.0391350325076205	-3.03101903181726
TGGT1_232560	-0.33053778977386	7.30953128825847	-3.55623041919782	0.00596114704424675	0.0391350325076205	-3.03615380260239
TGGT1_299190	-0.299153223012986	5.56723222122517	-3.43118699809349	0.00727441571802015	0.0449067835662698	-3.03773924353073
TGGT1_222140	0.336588204451781	5.66522163902809	3.44372614217173	0.007130055548957	0.0442939403885974	-3.03868371659452
TGGT1_202220	-0.265794203880043	6.01648333348292	-3.47635921206852	0.00676819625252334	0.0426235216379148	-3.0390367583093
TGGT1_263060	0.231905777025817	8.44677165102058	3.58398620136436	0.00570482660658569	0.0379787924235138	-3.03974055312001
TGGT1_280670	-0.379958989599582	7.17324997260748	-3.54436835478016	0.0060743419509281	0.0395580015118679	-3.04804471129467
TGGT1_268765	0.345892983755796	5.64174555413177	3.42437101255495	0.00735416186705219	0.0453170722637626	-3.06629474136935
TGGT1_305090	-0.427858658335591	5.49927784179196	-3.40435843163397	0.00759361431618382	0.0460099433060759	-3.06705557292026
TGGT1_221390	-0.286960883919343	6.32198074454614	-3.48268171730668	0.00670033300012101	0.0423123875498918	-3.07013057594347
TGGT1_281510	0.245792983209585	6.4390100418983	3.49171405372095	0.006604613727438	0.042016585202212	-3.07196853123602
TGGT1_207800	-0.277098564263034	5.30364372524958	-3.38027202950069	0.00789261981206563	0.0471568605104912	-3.0719810549755
TGGT1_318470	-0.399811465000819	6.91114590289576	-3.51303739245443	0.00638426531500525	0.0409940173401411	-3.08078890876406
TGGT1_268680	-0.310093451043666	7.70414120250153	-3.53874923938873	0.00612874573461044	0.0397616834121849	-3.08219603615638
TGGT1_255670	0.393215661463911	5.32197448396543	3.37757185629737	0.0079268952320907	0.047252167710737	-3.08253217997831
TGGT1_236830	0.303213496415148	4.97984689769154	3.33374324502526	0.00850543013390283	0.0491528092696217	-3.08489798470787
TGGT1_238420	-0.45696383606528	5.6251871292541	-3.40563154774123	0.00757814206359375	0.0459940338753741	-3.08700718204184
TGGT1_225020	-0.219487747864382	7.07362764047885	-3.51739353909714	0.00634020319104314	0.0407872566368603	-3.08784566817006
TGGT1_257300	-0.319883500409495	7.92346446682887	-3.53916103322815	0.00612474152732935	0.0397616834121849	-3.09065988567339
TGGT1_203990	-0.230298097939851	7.51270454242596	-3.52518280961956	0.00626220590420793	0.040436798125106	-3.0966485244826
TGGT1_225350	0.271689935910611	5.66777055205845	3.40730809836943	0.00755781693172808	0.0459553944023344	-3.09953006923348
TGGT1_262730	-0.219559898482843	8.5784264348453	-3.55064333948134	0.00601418478227831	0.0393597370196995	-3.09979177407176
TGGT1_249320	0.403782501989878	6.97098811713186	3.49416998140069	0.00657883503258835	0.0418913412213982	-3.11973250137964
TGGT1_204510	-0.323716187655608	6.66427968732958	-3.47198527603335	0.0068155640159001	0.0427651767676505	-3.12671163064169
TGGT1_319920	0.240596161628953	7.38187417310414	3.50251724226449	0.00649200081404027	0.0414151109444851	-3.12869380373162
TGGT1_238995	-0.331033101905367	5.9114165228472	-3.41145033579235	0.00750784294709076	0.0458595171130682	-3.12896929611005
TGGT1_309410	-0.333593631764072	6.06679940406305	-3.41407572583619	0.00747634731683763	0.0457834732839648	-3.1481214601733
TGGT1_267040	0.300601314525747	5.68977544257777	3.37905951652785	0.00790799207089776	0.0472076922496215	-3.14987303505894
TGGT1_321310	0.271544030680121	5.74611899628739	3.38365656301264	0.00784987500338153	0.0469831073962183	-3.15209542297818
TGGT1_223110	-0.343349237988029	7.04479858791114	-3.475380891172	0.00677876110586011	0.0426509973696249	-3.15386586180661
TGGT1_231220	-0.269347827416945	5.95434942701164	-3.39990045961571	0.00764805214403321	0.0461883827546292	-3.15571589271173
TGGT1_313060	0.215195269677467	6.92589993272103	3.46971069107196	0.00684033340536206	0.0428814702175706	-3.15797116276027
TGGT1_255180	0.310025427571076	7.1927051362436	3.47813571971305	0.00674905573666424	0.0425419397809715	-3.15999069006298
TGGT1_244460	0.237027713150073	7.97356292063503	3.48825047086953	0.00664114876028089	0.0420932534787573	-3.17652124887228
TGGT1_210390	0.333352973023811	5.54596141168233	3.34144245133911	0.00840070783158135	0.0488871199797581	-3.18578120746802
TGGT1_309040	-0.294548440637474	6.58362628422527	-3.42210062025184	0.0073809270540352	0.0453607107690796	-3.20094939668901
TGGT1_228490	0.268800702264945	6.29115624435132	3.40051187671601	0.00764056193129092	0.0461883827546292	-3.20373740782299
TGGT1_280540	-0.278010530127149	6.84593112754617	-3.43467230541748	0.00723398693884342	0.0447375253403113	-3.20646913990883
TGGT1_224650	-0.287595905766829	5.84870890971737	-3.35868010121005	0.00817107754783576	0.0479219046762842	-3.20680497096844
TGGT1_314430	-0.339500395584829	8.43713938975318	-3.48070225942326	0.00672150297773833	0.0424071339246849	-3.20897932225701
TGGT1_246330	-0.264513490922807	6.21508275195412	-3.38751185689326	0.00780147819234126	0.0468565637805509	-3.21354837625075
TGGT1_295125	-0.284027188598032	8.0530980405065	-3.46790341125418	0.00686008099822755	0.0429270036622483	-3.21360785469406
TGGT1_235370	-0.337767593756341	8.67659727033764	-3.48272819852889	0.00669983672856472	0.0423123875498918	-3.2155292344289
TGGT1_249180	-0.317003253635237	9.0568379191573	-3.49059487323015	0.00661639620492762	0.0420437617142522	-3.21648848375975
TGGT1_273050	-0.281098893755183	7.19808329719597	-3.44267521665746	0.00714203909686424	0.0443283419396529	-3.2179632565532
TGGT1_224350B	0.340525938485914	6.53019922593388	3.40730276499739	0.00755788149906066	0.0459553944023344	-3.22205823932788
TGGT1_285250	-0.21421532660573	8.98555240158751	-3.48431308399633	0.00668293814230159	0.0423073436267235	-3.2245825499777
TGGT1_320670	0.360243780639955	6.37879545158386	3.39395461114532	0.00772129225561084	0.0465375344801365	-3.22559068501364
TGGT1_205510	0.283589504687219	7.22171255314775	3.43544901799363	0.00722500921251984	0.0447222217412231	-3.23206172117855
TGGT1_237290	0.252753360778632	7.09885538769107	3.42807302681497	0.00731073634358061	0.0450905236186582	-3.2378853043012
TGGT1_234540	-0.294309745733183	6.62797301110196	-3.40244633828553	0.00761691394709184	0.0461104905054142	-3.23822965805288
TGGT1_203180	-0.413534482720252	7.05793319448909	-3.42382010923182	0.00736064704356883	0.0453170722637626	-3.23912086676916
TGGT1_218530	-0.419021362179975	6.43352356659111	-3.38688833291189	0.00780928439448217	0.0468625207511814	-3.24053982602699
TGGT1_202550	-0.405944586552862	6.249249315437	-3.37236538365563	0.00799342311421066	0.0475159400309153	-3.24145607054488
TGGT1_311240	-0.224184717312155	8.27188629090065	-3.45573149703454	0.00699463911423704	0.0437292119896437	-3.24329146754813
TGGT1_275420	0.292624843482565	6.63852516869694	3.39974727799739	0.00764992990512181	0.0461883827546292	-3.24694746615872
TGGT1_311800	-0.298558276245257	6.97153814788292	-3.41584864204165	0.00745515633493728	0.0457351562135269	-3.24759954981948
TGGT1_211410	0.329229333080952	5.98233216882532	3.34724147013833	0.00832271675454599	0.0485456515021313	-3.24908184943059
TGGT1_297690	0.258983707712858	6.2681249059618	3.37024401659625	0.00802069612382128	0.0475282857349622	-3.25080767825813
TGGT1_260830	-0.360615157138231	6.91401096914265	-3.40932412885362	0.00753345140400162	0.0459286749160631	-3.2528868941046
TGGT1_226030	-0.2067080612155	8.28797306520723	-3.44852112739849	0.00707564459039657	0.0440725470717626	-3.25593806040647
TGGT1_315440	-0.34890364169831	6.87359061055938	-3.40512448542709	0.00758430048199422	0.0459940338753741	-3.2566225811484
TGGT1_310240	-0.21165126433417	7.16402089256756	-3.41700032234109	0.00744142428834408	0.0456916739561984	-3.25899667675398
TGGT1_253130	-0.255666300931714	7.14303741586255	-3.39703011626649	0.00768331786893429	0.0463492780567203	-3.29056210419549
TGGT1_254420	0.280444631328253	6.49885046955759	3.36339153066284	0.00810945737602064	0.047788122000766	-3.29115472421527
TGGT1_205330	-0.294470163502558	7.89408210360332	-3.41137317292887	0.00750877072405333	0.0458595171130682	-3.30047807282254
TGGT1_201390	-0.380392933204149	9.27423130473745	-3.43981090507553	0.00717480718225424	0.0444514855787048	-3.30745498481116
TGGT1_224880	-0.462841896310266	7.31686137624074	-3.39062574859224	0.00776261526980178	0.0467456262788326	-3.30925346161318
TGGT1_250810	0.2124700259311	9.657379525815	3.44403081005522	0.00712658538874876	0.0442939403885974	-3.31193235675448
TGGT1_244250	-0.230768907528537	8.31310735337462	-3.41309597544318	0.00748808481179909	0.045814554493543	-3.31565076992104
TGGT1_205500	0.222604073328138	7.27615660689958	3.38468247728791	0.00783696591306706	0.0469643586885002	-3.31877775434679
TGGT1_260650	0.499352643701516	6.92923647963147	3.36905394521382	0.00803603845948815	0.0475282857349622	-3.32256385320189
TGGT1_267800	-0.253028517726397	6.75954568220795	-3.35980986154607	0.00815625730577058	0.0478997280032316	-3.3226999415403
TGGT1_218740	-0.390001531909601	7.07514742571657	-3.36997266333329	0.0080241917109567	0.0475282857349622	-3.32972098971854
TGGT1_255220	-0.256467559701839	7.76904850453054	-3.38841605983684	0.00779017246210865	0.0468295594597213	-3.33329425140181
TGGT1_263820	0.294121423523608	6.65014561213467	3.3481790143639	0.00831017857031716	0.0485136655586342	-3.33361403455357
TGGT1_259830	0.264446267644559	7.12097777601482	3.36769712534026	0.00805356776600638	0.0475282857349622	-3.33903891368455
TGGT1_215430	0.218316668419673	7.40232307698318	3.37420891941972	0.00796980036823203	0.0474530884262612	-3.34175058112658
TGGT1_201790	0.239388716305178	6.87844292752915	3.35500701423861	0.00821945510636949	0.0481065470353217	-3.34397434867573
TGGT1_252500	-0.239692748815484	7.92383687533777	-3.38444808684753	0.0078399133014975	0.0469643586885002	-3.34627189037986
TGGT1_278660	0.237306856257995	8.10986791966168	3.38917046555253	0.00778075277958389	0.046813855525108	-3.34644939038826
TGGT1_462965	-0.308461247093149	7.29908933075487	-3.36069025750309	0.00814472762017295	0.0478997280032316	-3.35876544867949
TGGT1_249440	-0.332872993496303	7.62167690337505	-3.36846659780001	0.00804362176133933	0.0475282857349622	-3.36018901417897
TGGT1_288640	-0.281713315355063	7.32063219465383	-3.35845982794635	0.00817397036284446	0.0479219046762842	-3.36363699093025
TGGT1_270150	0.321181356828058	6.839757473217	3.34043051201605	0.00841439508421933	0.0489012635568206	-3.36451895832972
TGGT1_216130	-0.24249648472529	6.86567995806835	-3.34007291003616	0.00841923746565007	0.0489012635568206	-3.36526759463632
TGGT1_207640	0.263393680736402	7.42241206870591	3.35994526361932	0.00815448297301541	0.0478997280032316	-3.36622678158418
TGGT1_270350	-0.228184650113696	7.1019121586258	-3.33871519757441	0.0084376489949139	0.0489668456860953	-3.38498358571454
TGGT1_211630	-0.397417819287158	8.36338241054541	-3.36810947037659	0.00804823630910822	0.0475282857349622	-3.39214173611245
TGGT1_301390	-0.231312483059948	7.24927529860949	-3.33793429177893	0.00844825757520619	0.0489870719601121	-3.39439182078758
TGGT1_290200	-0.39646185917417	8.76786172689463	-3.37230678616694	0.00799417516588178	0.0475159400309153	-3.4017902118289
TGGT1_202840	-0.197108511317499	9.1550663664562	-3.36071353680578	0.00814442298405001	0.0478997280032316	-3.43510690998921
TGGT1_289540	0.254541971912285	8.11597881080603	3.3358235521589	0.00847700133696311	0.0490297209371701	-3.43522837440774
TGGT1_224350A	0.263167077284098	8.54797881382179	3.34302838174699	0.00837930344987721	0.0488342964616997	-3.44226544288452
TGGT1_254940	0.267690695636952	9.25735187429442	3.35730563099714	0.00818914567758999	0.0479699785560361	-3.4442341110782
TGGT1_217510	-0.306733748842535	9.03563779934963	-3.33588912191214	0.00847610688914808	0.0490297209371701	-3.47210437540748
