# Supplementary material for: A serine–arginine-rich (SR) splicing factor modulates alternative splicing of over a thousand genes in Toxoplasma gondii
Source: Oxford University Press journal article supplement (doi:10.1093/nar/gkv311), 2015-04-13
Supplement: gkv311_Supplementary_Data.zip [file gkv311_Supplementary_Data.zip › nar-03398-a-2014-File016.txt]

	logFC	AveExpr	t	P.Value	adj.P.Val	B
TGGT1_206400	5.144974685484	6.81214228755368	36.8367057481609	1.8144081700049e-13	1.32596949063958e-09	21.2547168819011
TGGT1_206550	2.86495402133502	5.90008242659602	30.2268232782979	1.79549136893353e-12	3.22645850030535e-09	19.1623617958932
TGGT1_213340	5.05208224450774	6.05049007865207	30.3083266850726	1.74042999824198e-12	3.22645850030535e-09	19.032635111697
TGGT1_244720	2.44224613092246	7.45125194107521	29.6843274090375	2.21379174821619e-12	3.22645850030535e-09	19.024755501006
TGGT1_310380	2.84642392428196	6.55992273270959	29.3885856975966	2.48545323045646e-12	3.22645850030535e-09	18.8963968093452
TGGT1_221922	2.78760095973583	7.6465178825707	28.839690817881	3.09047749071394e-12	3.22645850030535e-09	18.6926342126105
TGGT1_205160	4.69645852932437	7.00549784586247	28.8532983369793	3.07368064362576e-12	3.22645850030535e-09	18.6774831672492
TGGT1_221818	3.25371916724283	6.98118028849106	27.5364303068717	5.271119017788e-12	4.28014864244385e-09	18.1598522490534
TGGT1_244715	3.43432832599047	5.25092440616142	27.8397448665278	4.64513006362349e-12	4.24332631312006e-09	18.1295869369485
TGGT1_249840	2.68895420916744	6.59522130796178	27.0099930726328	6.5857744317143e-12	4.37534904972438e-09	17.9375438156827
TGGT1_215530	-2.77560263136881	7.81634805819663	-26.6132346624321	7.81099680132948e-12	4.39098189416276e-09	17.7591102503992
TGGT1_220230A	2.6293996043217	7.30844225614092	26.3779055548102	8.65296725850964e-12	4.51684890894203e-09	17.6604418011687
TGGT1_291830	4.32528493886753	4.38884825947807	27.2574284545406	5.92827361206362e-12	4.33238235569609e-09	17.5009140813948
TGGT1_242320	3.29571632357798	8.43034402406321	25.2072533128666	1.45947848449536e-11	6.35528873176132e-09	17.117454418566
TGGT1_308950	2.02587285199605	8.42794329877293	25.1790834232214	1.47837860481585e-11	6.35528873176132e-09	17.1048591993558
TGGT1_261560	4.47749423943284	6.28851346253953	24.9571411785176	1.63690743058056e-11	6.64584416815707e-09	17.0118994494422
TGGT1_278518	6.15938820944935	4.36192702262912	26.803333407037	7.19565515389557e-12	4.3821539887224e-09	16.8373611107728
TGGT1_227370	6.94309875294574	5.20906662807775	25.7327236610648	1.15094336291458e-11	5.60739606411985e-09	16.741901449639
TGGT1_227810	-2.10992156675109	8.32448701585577	-23.9547428693632	2.62226743032046e-11	8.71905274198793e-09	16.5190291818089
TGGT1_312480	2.10136676811585	6.83843110937039	23.8602220253133	2.74409158546418e-11	8.71905274198793e-09	16.4960312471611
TGGT1_269430	2.21473950631747	7.12188282653479	23.8613285821748	2.74263040265304e-11	8.71905274198793e-09	16.4918594784377
TGGT1_310480	4.82948932167506	4.9956447743113	24.0924950369721	2.45509891740062e-11	8.71905274198793e-09	16.4066534198051
TGGT1_232320	2.41784554310897	6.55391210025507	23.4956759653673	3.27469898566322e-11	9.97145841134452e-09	16.3250628669239
TGGT1_411430	-2.0760625290731	8.00237495116214	-23.2126471312382	3.76331713200893e-11	1.10009286402885e-08	16.152378628408
TGGT1_313660	2.4777483283448	6.087882543398	23.1075077745828	3.96449946094212e-11	1.11432931002173e-08	16.1434116786032
TGGT1_244280	-2.29255389921707	8.14973072493382	-22.7352442083024	4.77607943695714e-11	1.2927255009364e-08	15.9042916915014
TGGT1_205150	3.20149995140576	6.56383660827456	22.5822502955704	5.16038451315655e-11	1.34686035793386e-08	15.8720322352182
TGGT1_297670	5.54846465433904	3.67543757635312	24.4362749242835	2.08619822418029e-11	8.02417716963660e-09	15.7929312550597
TGGT1_233920	2.45690068776801	5.89126682500018	22.1513908991706	6.43459663773173e-11	1.55148552946397e-08	15.6596008414054
TGGT1_249980	2.84572745776355	5.16151955481952	21.9229322841259	7.24545019894426e-11	1.65467968918389e-08	15.5392770556735
TGGT1_266910	1.77497318753747	6.9325143948972	21.8497335322971	7.52816119837446e-11	1.66714551629456e-08	15.459342413607
TGGT1_260230	2.04280111274924	7.05633252988509	21.647865241683	8.37164324538953e-11	1.74765127269317e-08	15.3484997545255
TGGT1_248240	3.22855302866459	4.58963181394783	21.6636907218387	8.30195129280151e-11	1.74765127269317e-08	15.3469921404799
TGGT1_233210	3.97500549835239	3.68197502903412	22.1078262146754	6.58128782339671e-11	1.55148552946397e-08	15.2423090973904
TGGT1_295105	-2.28388576891549	5.67416038996072	-21.2622571635432	1.02817055405973e-10	1.97966589447471e-08	15.1938935940568
TGGT1_299995	3.21769787772709	4.40820904713359	21.2600650432995	1.029382922688e-10	1.97966589447471e-08	15.1198528390937
TGGT1_218270	-2.04740193785617	7.42526927542355	-20.6843285792622	1.40853050079886e-10	2.39384672089257e-08	14.8016391009951
TGGT1_202280	2.70162658910089	4.98845935207575	20.3511694711681	1.69523736338164e-10	2.81563514808932e-08	14.6993447912397
TGGT1_309570	2.61860450160604	6.20494512154854	20.1877147825815	1.8585160403294e-10	2.95261635276679e-08	14.570397118685
TGGT1_269417	-2.87823595251171	4.34160000703739	-20.2140247609788	1.83112294703598e-10	2.95261635276679e-08	14.5687454352869
TGGT1_299130	2.03695086506257	6.40080262168343	20.0790352581472	1.97646601457238e-10	3.00916950718645e-08	14.48527902477
TGGT1_220230B	2.29793515320653	6.34439414924251	20.0212564249266	2.04245439611019e-10	3.04617484219863e-08	14.4593143861642
TGGT1_275650	1.72880479165134	7.52420031195719	20.0866431309335	1.96795065772192e-10	3.00916950718645e-08	14.4531773246321
TGGT1_254960	2.4079521797611	5.12665630589337	19.8807949545203	2.21304031219344e-10	3.1711565885313e-08	14.434123929056
TGGT1_224480	1.6801644612236	7.90661895532547	19.9078793049228	2.17898289051751e-10	3.1711565885313e-08	14.3385561898357
TGGT1_266035	2.69720104774694	4.2383992665524	19.7759008583225	2.35048382790661e-10	3.30333381045029e-08	14.3385301863304
TGGT1_231950	-2.25630831703615	5.7972704353305	-19.621173315264	2.57038328166095e-10	3.54421906082608e-08	14.2591912717002
TGGT1_225105	3.00098626811507	6.32645812147557	19.5552856060942	2.67070180007653e-10	3.61434976943691e-08	14.2012043925386
TGGT1_278522	6.26449089635712	3.20956756304421	21.1747303396012	1.07780292302154e-10	2.01963686190806e-08	14.0976037342974
TGGT1_263410	2.90164002176317	4.56407000407646	19.2603417065059	3.17477195755798e-10	4.14307740461316e-08	14.0657172630939
TGGT1_213255	2.02642728717397	6.72792863412649	19.2047161679513	3.28091732876167e-10	4.20648137519128e-08	13.9460283443166
TGGT1_235960	2.27327438023498	5.06058784237607	19.0240839423933	3.65296915591378e-10	4.37761985666851e-08	13.9308067658392
TGGT1_227300	2.53748162028648	5.80802850972282	19.0021867906503	3.7010894517419e-10	4.37761985666851e-08	13.885859388192
TGGT1_231420	3.8403540893541	3.59798524308163	19.1248532275366	3.4400895260849e-10	4.33451280286697e-08	13.786607884939
TGGT1_299800	4.33411217665776	3.13043199410738	19.3567293254883	2.99954483826231e-10	3.98557703236744e-08	13.6836163249861
TGGT1_248900	2.967538211962	3.83781756559098	18.7144144219693	4.40150943992104e-10	5.1057509503084e-08	13.6803937321493
TGGT1_218500	2.80512633539231	4.09000816001969	18.5945809210997	4.73443057554572e-10	5.32295671478279e-08	13.6484322511876
TGGT1_230970	-1.9906775325129	5.42405684448206	-18.5475288966739	4.87252126603444e-10	5.39520991093632e-08	13.6212984690097
TGGT1_293430	-1.93639060565504	7.74429779032342	-18.6427325363103	4.59748858437842e-10	5.24975727728711e-08	13.5617470612814
TGGT1_244710	1.75814872034516	6.33905059125664	18.4974548812691	5.02428633664856e-10	5.48022157436234e-08	13.5174080650914
TGGT1_205520	5.45316977002107	3.54173020619811	19.0862560202116	3.51999693388959e-10	4.36002332082459e-08	13.5150366111008
TGGT1_245440	1.74492506574628	5.94439874846854	18.4569066606261	5.15093189724873e-10	5.5357368095726e-08	13.5143247335152
TGGT1_320230	2.91929170011863	4.50582595635061	18.2929067546658	5.6995673586233e-10	5.95034832240273e-08	13.4898172304439
TGGT1_293850	7.32804350430627	-0.590519992886484	22.4838355034736	5.4252268498568e-11	1.36715716616391e-08	13.3842718265888
TGGT1_240410	-1.58878371962652	6.04288827442792	-18.2501004549984	5.85296412126084e-10	6.02443123917947e-08	13.3782266783694
TGGT1_267410	7.40152719227153	1.43956618055403	21.5949922408635	8.60911956991709e-11	1.74765127269317e-08	13.3423617176601
TGGT1_409120	4.16941456577829	3.72699612817114	18.3147082035557	5.62311940806443e-10	5.95034832240273e-08	13.339944551441
TGGT1_291840	2.37639582885688	4.73456551862434	18.0465848600086	6.64601486829495e-10	6.20394971394184e-08	13.3393422299127
TGGT1_267030	3.62597959124894	4.14805799229032	18.0980780280839	6.43492547697627e-10	6.10732927087565e-08	13.3271248244557
TGGT1_319520	3.75100159348398	5.03576683714819	18.01180950121	6.79280678503878e-10	6.20522899813293e-08	13.3195601159522
TGGT1_222400	1.7310087256009	6.24423540163559	18.1444252226338	6.25112946441717e-10	6.02689361926295e-08	13.2949493281255
TGGT1_311500	1.66227910286404	6.20513329638418	18.1401851632154	6.26770546064565e-10	6.02689361926295e-08	13.2927814666235
TGGT1_236890	-2.01512072918188	6.60371526947272	-18.1521088100539	6.22121221810286e-10	6.02689361926295e-08	13.2905012945078
TGGT1_222410	1.79179471266753	7.08779522079636	18.1875190441527	6.08532614538739e-10	6.02689361926295e-08	13.288091303936
TGGT1_273860	-1.72704267135217	7.28462805976032	-18.1406451785726	6.26590478736704e-10	6.02689361926295e-08	13.2518183738675
TGGT1_201520	-1.71605210593919	6.2113942232682	-17.9748937428051	6.95248343803769e-10	6.27268505742956e-08	13.1920223464771
TGGT1_205140	7.31625596839062	2.33135601868992	20.8738302839779	1.26924626762504e-10	2.26235407897654e-08	13.1442825241291
TGGT1_275590	7.28998063229063	1.22093084670602	20.9032975638777	1.24896220212137e-10	2.26235407897654e-08	13.1024895467899
TGGT1_253710	4.07319147437198	3.53181058019489	17.910530067356	7.2406879969831e-10	6.45304242462836e-08	13.0750850653024
TGGT1_315900	2.25058572448265	6.88174677924933	17.8245153017092	7.6462107729568e-10	6.73235040105642e-08	13.0612748470829
TGGT1_235190	7.48211479491149	1.31909541468374	20.6926692992575	1.40206340858726e-10	2.39384672089257e-08	13.0419561033049
TGGT1_294700	1.57537605360872	6.39181891555868	17.5288288319142	9.23898067450037e-10	7.76074376658031e-08	12.8769955387727
TGGT1_235183	4.11116380490444	3.4413721839473	17.5518226439573	9.10305939001711e-10	7.73548349095873e-08	12.8431589429298
TGGT1_300190	-1.46602958170367	8.85870265309	-17.5597796591386	9.05652918683928e-10	7.73548349095873e-08	12.822164065765
TGGT1_312410	2.16545829233585	5.49279685869936	17.2747227985982	1.08964439618917e-09	8.38223289194785e-08	12.7875587377488
TGGT1_202850	2.01718156210611	5.78916578791473	17.2798068323704	1.08602905197656e-09	8.38223289194785e-08	12.7611950056608
TGGT1_232420	4.1100435851708	3.10815334213435	17.4937338663	9.45068784500159e-10	7.84836667855359e-08	12.7199041976733
TGGT1_208760	3.80366718319423	3.42692307402091	17.2828881042398	1.08384422673676e-09	8.38223289194785e-08	12.7085093383171
TGGT1_233090	1.39810271355603	6.60773246376533	17.2491519313902	1.10802689577205e-09	8.39194226394677e-08	12.6749461239122
TGGT1_277930	3.33291140226654	4.58926248566438	16.9896455719302	1.31478919555089e-09	9.23892253950567e-08	12.6632731846183
TGGT1_216640	2.82788983525044	3.58621340164757	17.028606981444	1.28124780499465e-09	9.23892253950567e-08	12.640412178293
TGGT1_290645	5.17099690205676	3.34255405920582	17.4587523399361	9.66694608336552e-10	7.93775752553204e-08	12.6347749382528
TGGT1_277490	-1.43093662272822	7.83638451699847	-17.2411158486906	1.11387301532955e-09	8.39194226394677e-08	12.6343072181456
TGGT1_266785	3.93718766283843	3.09348622529639	17.299179324084	1.07237146934162e-09	8.38223289194785e-08	12.6258623886754
TGGT1_238230	1.6758611378413	6.07153943356365	17.1205604715145	1.20570148036264e-09	8.90403123897078e-08	12.6204283380141
TGGT1_239475	2.63137759180121	4.63331589995442	16.7723834220703	1.52012913295868e-09	9.74482781022983e-08	12.5140155361151
TGGT1_226620	2.23392405308807	6.74801753367691	16.9967538071959	1.30859962174266e-09	9.23892253950567e-08	12.5059295266341
TGGT1_203290	1.58918271189385	7.35998866201372	17.0334896481335	1.27711011116387e-09	9.23892253950567e-08	12.5042715071311
TGGT1_273468	4.05570882111955	2.68190265457011	17.3306449152743	1.05058284307863e-09	8.38223289194785e-08	12.4960985616751
TGGT1_309580	1.83153835161528	7.11344986948683	17.0098170840008	1.2973067032941e-09	9.23892253950567e-08	12.4952996964641
TGGT1_360740	1.59450264555383	6.2450881665714	16.9403657611586	1.35858129613225e-09	9.27898328236864e-08	12.482940727662
TGGT1_304700	1.72730155875214	6.74414050516998	16.9508940525948	1.34909450440948e-09	9.27898328236864e-08	12.4668614907017
TGGT1_277050	1.7833791180981	5.78711947920749	16.8573853690758	1.4359295248065e-09	9.50329933731561e-08	12.4634640199813
TGGT1_209040	2.09661206468882	6.11819373558591	16.8495865192239	1.44344037553644e-09	9.50329933731561e-08	12.4425414573908
TGGT1_239130	2.5997193337811	5.98400255905982	16.7912871680675	1.50095212487456e-09	9.70704259166664e-08	12.4303899519602
TGGT1_270240	-2.30207021747204	8.77853034278911	-16.9746173145543	1.32797977550203e-09	9.24273923749414e-08	12.4215467129186
TGGT1_235187A	7.03555671041283	1.50297397264482	18.9964054757108	3.71390847172205e-10	4.37761985666851e-08	12.4163445151665
TGGT1_214990	1.930512230364	7.58824954539405	16.8049313836864	1.48727340699702e-09	9.70445898065558e-08	12.3369678968411
TGGT1_299990	1.80427916970493	5.81753490069325	16.5983734572705	1.70964439947699e-09	1.0499227959141e-07	12.2806782104406
TGGT1_314515	1.70828268603976	5.68647643893781	16.4742553143135	1.86039156270226e-09	1.09643076937324e-07	12.2007915006756
TGGT1_203200	3.73887154338239	3.45289283440292	16.4315682959977	1.9155119702226e-09	1.11988491827094e-07	12.1935057626255
TGGT1_224320	3.25369863089686	5.33842207981293	16.3363225920135	2.04497644178788e-09	1.14959137204506e-07	12.1909057036389
TGGT1_300130	2.64729630889203	4.70864098118265	16.2827701223402	2.12190273550386e-09	1.16972406421537e-07	12.1746467154301
TGGT1_237000	-1.6234348601726	5.44929016602224	-16.3673592433899	2.00177865400518e-09	1.14395156518965e-07	12.1536313318752
TGGT1_245752	3.07690784722708	4.5337855162871	16.2315687527762	2.19838671587122e-09	1.16972406421537e-07	12.1510486828776
TGGT1_201785	2.53070799893484	5.23081019735215	16.2562742058167	2.16111609091656e-09	1.16972406421537e-07	12.1177362111717
TGGT1_229240	3.97446741601884	3.91108923694512	16.2374999959232	2.18937584105244e-09	1.16972406421537e-07	12.1150602100924
TGGT1_223480	1.85412169394524	6.61633088549166	16.3634321261257	2.00718956477546e-09	1.14395156518965e-07	12.0583966301174
TGGT1_247470	1.35116461582453	7.66612725162424	16.3546908167245	2.01929052968617e-09	1.14395156518965e-07	12.0154207068045
TGGT1_204390	1.96340463192556	5.36795558172732	16.152256032059	2.32281471672807e-09	1.19565495529812e-07	12.009514074675
TGGT1_290040	-1.70562965477341	5.94142272031346	-16.2143041619332	2.22484462131824e-09	1.16972406421537e-07	12.0011779152678
TGGT1_208810	4.43171828329523	2.9686775706917	16.3854024323275	1.97712019357627e-09	1.14395156518965e-07	11.9933912699361
TGGT1_223060	1.71015091124881	7.98490051681716	16.3210062442265	2.06666500152276e-09	1.15291510161285e-07	11.9797196147392
TGGT1_262380	1.47798088785451	6.61149485320767	16.2294960131072	2.20154512219295e-09	1.16972406421537e-07	11.9562287130134
TGGT1_235187B	7.58825041486126	0.0696141817690475	18.0321527528314	6.7065137849125e-10	6.20394971394184e-08	11.9422663550067
TGGT1_252870	2.41363496187922	5.17359825760395	15.9677042001962	2.64284987740834e-09	1.27906933139736e-07	11.9125860113365
TGGT1_209300	4.39459511472261	3.70908788309588	15.9977946655613	2.58756905716225e-09	1.26912447447931e-07	11.9090164382628
TGGT1_256800	4.07708084245472	2.9248642295471	16.1838981761144	2.27228314493711e-09	1.18613180165717e-07	11.8943718151102
TGGT1_257040	-1.30231525691059	7.02846357307878	-16.1419040365009	2.33960945002232e-09	1.19565495529812e-07	11.8771600942591
TGGT1_308090	-1.32760913007264	9.51174050462155	-16.222947105672	2.21155654251824e-09	1.16972406421537e-07	11.8567067349059
TGGT1_316450	1.35327897907432	6.13622773019483	16.0511628886491	2.49257579356444e-09	1.24541580297487e-07	11.8490514761291
TGGT1_264600	-1.63688244480209	6.29364677920952	-16.0439752352381	2.50514673012187e-09	1.24541580297487e-07	11.8467483773599
TGGT1_266970	-2.04106398602854	6.80093913877863	-16.0719409549344	2.45661796954157e-09	1.23813545664895e-07	11.8435867849811
TGGT1_264178B	6.3287525490672	1.26822674847066	17.6796519819988	8.3858426293655e-10	7.29568308754799e-08	11.8326565598948
TGGT1_282200	5.2546498615366	2.67184830993032	16.4856972224757	1.84591037299324e-09	1.09643076937324e-07	11.8316007620752
TGGT1_235390	6.23723598660592	2.5546814626637	16.9085106417154	1.3877275687237e-09	9.39028988169703e-08	11.823804063648
TGGT1_250760	2.03249848350974	5.92163031829006	15.9244167761267	2.72462870377188e-09	1.3014108867428e-07	11.7931906711344
TGGT1_254790	5.03363752160699	2.27506954051035	16.6317604842013	1.67138842859229e-09	1.04397492616688e-07	11.7895017793046
TGGT1_283855	4.38466777358837	2.70646895190581	16.1450823278568	2.33443916255181e-09	1.19565495529812e-07	11.7759748142785
TGGT1_297660	4.70111325266168	2.64216471171875	16.231862078421	2.19794014724376e-09	1.16972406421537e-07	11.769251973645
TGGT1_252395	3.53983975568054	2.71285744520128	15.895231315873	2.78130901833165e-09	1.3113423423205e-07	11.7111884020672
TGGT1_202572	1.581205726894	6.18755469501036	15.8376171825308	2.89698031506585e-09	1.35712385528854e-07	11.6935951757875
TGGT1_269180	1.51980858302511	9.73511956998208	16.0123740389317	2.56123551575186e-09	1.26469656412936e-07	11.6925332057556
TGGT1_258550	3.70096037317891	3.08637388923916	15.7342553066896	3.11775438572605e-09	1.43299050634503e-07	11.6798828403831
TGGT1_214080	-2.06802007802551	7.83212952798404	-15.8188825725007	2.93570659217179e-09	1.36650597296761e-07	11.6117228014038
TGGT1_322000	-1.76073073745259	5.58198912608625	-15.6310125801468	3.35655505068387e-09	1.46736916643895e-07	11.6090821456489
TGGT1_294820	3.61376024087483	3.53128434156108	15.5159148256489	3.64632456661331e-09	1.52270513901772e-07	11.6063450816463
TGGT1_315240	3.84578587462632	2.33507230701553	15.9430289975909	2.68913573230861e-09	1.29290815340206e-07	11.5959728692967
TGGT1_293280	2.00851673388149	5.90780193066498	15.6533113462593	3.30335085368457e-09	1.46736916643895e-07	11.5928863815791
TGGT1_203500	6.73415416952579	-0.35795369525553	17.436689409011	9.80609139823576e-10	7.96254621536744e-08	11.592716689079
TGGT1_293500	2.21124559495553	4.46345397979095	15.4472675286269	3.83195175691034e-09	1.57325300221914e-07	11.5812562148198
TGGT1_321570	-2.15846643536107	6.22090409908095	-15.650294903632	3.31049433731258e-09	1.46736916643895e-07	11.5779217451607
TGGT1_253690	-2.0469840561449	7.31146048580209	-15.7062673372356	3.1806196004897e-09	1.45274800252367e-07	11.5465704080827
TGGT1_247310	3.79341930287984	3.27477186627356	15.4590890878589	3.79927036900215e-09	1.56864790150665e-07	11.5247485674607
TGGT1_313000	4.9437437540904	2.58125427373001	15.9024840973124	2.76710545992741e-09	1.3113423423205e-07	11.5188070894111
TGGT1_253890	1.33167798303245	7.69282958675815	15.6807982102019	3.23901986764619e-09	1.46115785140484e-07	11.5171274649179
TGGT1_225190	1.5529740658896	6.46972346938095	15.6226018202667	3.37686300309035e-09	1.46736916643895e-07	11.5150871307518
TGGT1_259210	1.28975259695335	6.0583921509704	15.58601759759	3.46675564512494e-09	1.47806934785217e-07	11.506835807036
TGGT1_319700	5.46881658536734	3.29352511866796	15.6158172252567	3.39334139474799e-09	1.46736916643895e-07	11.4875321727243
TGGT1_224750	3.66213450617656	3.01627221958855	15.4266874671284	3.88957427308773e-09	1.57916715487362e-07	11.4656755811725
TGGT1_252080	4.3123446615924	2.36727250742665	15.7782185093973	3.02170398885919e-09	1.39763371839132e-07	11.4520014073599
TGGT1_229310	1.77514985222546	6.60518460298308	15.5320280966701	3.60417754041884e-09	1.51375456697591e-07	11.4430457271872
TGGT1_262990	1.63299344850459	5.60665445080712	15.429671427017	3.88116164810719e-09	1.57916715487362e-07	11.4388024264604
TGGT1_309100	2.69423490149425	6.51119074204572	15.4832387289288	3.73344039521706e-09	1.55022627319581e-07	11.436268488808
TGGT1_313930	1.73156724399981	7.89220693695319	15.5691946388627	3.50895790827256e-09	1.48228117882404e-07	11.4245179824662
TGGT1_291340	6.47891693758096	1.72405042091544	16.7408164517942	1.55274607425094e-09	9.86736374837034e-08	11.4239586465008
TGGT1_213460	2.56310917014467	3.82825753253945	15.197498826009	4.598615964376e-09	1.76877291935052e-07	11.4200385649072
TGGT1_208770	6.18714687324168	0.426971535691641	16.8738981516933	1.42016574203904e-09	9.50329933731561e-08	11.3932213651633
TGGT1_310680	4.01674449311798	2.31550323482083	15.6466234808248	3.31921148705963e-09	1.46736916643895e-07	11.390632009141
TGGT1_258720	-2.76425361295172	3.90922960305091	-15.1283441466153	4.83913043174683e-09	1.84189402058364e-07	11.3686517648989
TGGT1_203590	3.407468300977	2.94585434935256	15.2149598450884	4.539953722429e-09	1.75544877267255e-07	11.3246661839684
TGGT1_259030	6.38930483832087	-1.05656535642054	17.1199194464864	1.206211128432e-09	8.90403123897078e-08	11.3173759918217
TGGT1_313990	1.90545285825958	6.17616063147629	15.3228184444989	4.19506153275188e-09	1.66334892252152e-07	11.3155107234559
TGGT1_236060	-1.38952535003108	6.44429014857616	-15.331509654885	4.16853061193774e-09	1.66334892252152e-07	11.2963195833869
TGGT1_247340	3.67869341309894	3.55332979534071	15.0715465362679	5.04684933805869e-09	1.88175382461903e-07	11.295294044802
TGGT1_250940	1.32539120517183	8.22469687193862	15.407271526306	3.94479728120168e-09	1.59273914536033e-07	11.2915853688582
TGGT1_294940	-1.59272914154049	6.01094545981038	-15.2544890769649	4.41011905577956e-09	1.71431649253388e-07	11.2752742191936
TGGT1_315100	5.87913357977678	2.65878538158595	15.6953779628726	3.20544816098534e-09	1.45499473046465e-07	11.2695442426103
TGGT1_262110	2.29337047396085	4.546982184306	15.0280030065913	5.21262292772727e-09	1.92393173514297e-07	11.2640661540011
TGGT1_205430	5.68858623666268	0.582814314208553	16.6106484276599	1.69547030103661e-09	1.0499227959141e-07	11.2589402494388
TGGT1_215670	5.65202956888582	0.647417563750438	16.5711187382994	1.74157640033553e-09	1.06062002780434e-07	11.2442057249043
TGGT1_254750	5.86886255720015	1.03982232582827	16.479846144183	1.8533003580393e-09	1.09643076937324e-07	11.2412873662993
TGGT1_247520	-1.28582481049638	9.30918834347677	-15.388979064038	3.99760134731894e-09	1.60519069484653e-07	11.2382352507199
TGGT1_240230	5.83728013425951	0.494948669462546	16.5133440632625	1.81142072751319e-09	1.09403823774102e-07	11.2106115249619
TGGT1_308960	2.91158323549492	4.40967771794456	14.9167226733099	5.66363677826383e-09	2.03890924017498e-07	11.2021155493875
TGGT1_316270	-1.65995926373094	5.57817624764751	-15.0970980303686	4.95223383197124e-09	1.87517745305937e-07	11.1999648170615
TGGT1_283840	3.14845251203574	3.85757286851471	14.8124948352319	6.12452579823414e-09	2.18331875773147e-07	11.1347787915126
TGGT1_233480	-1.87664375407719	10.6878635073509	-15.2774479395686	4.33655793313483e-09	1.70384760082523e-07	11.1016805287846
TGGT1_216053	6.34682521028533	-1.07740226967573	16.6551259227301	1.64516694332078e-09	1.03645517429209e-07	11.1003379131244
TGGT1_218530	-1.59836854602056	5.84198930207437	-14.9719665364374	5.43467763472914e-09	1.97811397698522e-07	11.0725274562112
TGGT1_285940	2.82093332313002	3.35867287130564	14.7069057417243	6.63307604609874e-09	2.2838193733574e-07	11.0405794224203
TGGT1_228160	2.84616940125119	5.27031611806347	14.7649452183744	6.34812029653519e-09	2.23038765034034e-07	11.0180672303063
TGGT1_315680	1.36564678814819	6.46284346584089	14.9412643685829	5.56066101766064e-09	2.0117480553002e-07	10.9875483989745
TGGT1_224140	4.55136812802997	3.75809217199993	14.6351529414257	7.00462549501924e-09	2.32680923261821e-07	10.9652979399286
TGGT1_221895	5.42805342026297	0.0461978649575424	16.108249934051	2.39512285579867e-09	1.21552484931782e-07	10.9401163521024
TGGT1_243655	4.50176658419609	1.89587825045624	15.2599402882191	4.39253180124529e-09	1.71431649253388e-07	10.9355362947434
TGGT1_363940	-1.25630627856044	7.05997384793873	-14.8835763787578	5.8060034322555e-09	2.07991534720212e-07	10.918700279255
TGGT1_309590	-1.0392137571922	11.40798798115	-15.0594975617873	5.0921425664246e-09	1.88900395306756e-07	10.9060667589546
TGGT1_205050	2.03695660597971	4.48135093278553	14.5548164506787	7.44751352172689e-09	2.40824906268938e-07	10.8988073716287
TGGT1_270910	1.85565578883881	4.51461479579341	14.5414567221161	7.52405675058622e-09	2.42228223494644e-07	10.8796314481029
TGGT1_224710	1.87972831400437	5.62968595360195	14.6916015975498	6.71049806895384e-09	2.2838193733574e-07	10.8745663670985
TGGT1_228430	6.40009625024229	-0.525301287004899	15.9780431148655	2.62371295215303e-09	1.27827295028896e-07	10.8641523159399
TGGT1_200410	1.39999977018706	5.97168102421154	14.7303843930288	6.51617118428199e-09	2.27847746481975e-07	10.8536603273946
TGGT1_271040	5.40608579735799	2.16936826370481	15.1671511186361	4.70253223759607e-09	1.7992725441022e-07	10.8470565825094
TGGT1_312950	-1.56143689605174	5.77700441661247	-14.6763980111138	6.78837971124361e-09	2.2838193733574e-07	10.8444778279221
TGGT1_203740	-1.86528714269697	4.63703532708999	-14.4922333441414	7.81350193028336e-09	2.46554653276121e-07	10.8381220141909
TGGT1_229320	4.50933781833406	1.87545572864085	15.0828767507976	5.00465524739987e-09	1.87559079733325e-07	10.8220189266067
TGGT1_207410	4.18963326823669	1.91601753890232	14.9704998123779	5.44062547036164e-09	1.97811397698522e-07	10.8111851899004
TGGT1_410790	3.29208820823857	3.07242187438727	14.4483687161265	8.08159477689673e-09	2.51320402678984e-07	10.8103214555122
TGGT1_264850	1.2445451211667	6.55054983558892	14.7096499874019	6.61929559799634e-09	2.2838193733574e-07	10.7980243686205
TGGT1_208020	4.08520522850102	2.89815947971621	14.505992947696	7.73139895469235e-09	2.45656798090833e-07	10.7830518504295
TGGT1_242310	7.333964103439	-0.0570405667611728	15.6234897434289	3.37471283280074e-09	1.46736916643895e-07	10.7764108786624
TGGT1_291930	1.42607463240857	8.81615325578395	14.7757219895769	6.29668165010173e-09	2.22300239125331e-07	10.7758387867067
TGGT1_233050	5.7191432542546	1.90955168943251	15.3177161785966	4.21072182083309e-09	1.66334892252152e-07	10.7606986730316
TGGT1_217520	-1.61110589049298	7.27047443584973	-14.688782597466	6.72486535821141e-09	2.2838193733574e-07	10.7576350858994
TGGT1_213560	1.8837019601616	4.30161944141811	14.3516017798706	8.70885013187917e-09	2.64127571501002e-07	10.7502846378803
TGGT1_306440	1.35767321189357	6.95181852892039	14.6656632343334	6.84395789224508e-09	2.2838193733574e-07	10.7483517744407
TGGT1_295420	-1.19329236460815	7.35568075353541	-14.6796616989228	6.77157919112579e-09	2.2838193733574e-07	10.7476664686736
TGGT1_321685	1.80513216352225	5.38192262173058	14.478793575766	7.89460712460485e-09	2.46554653276121e-07	10.7299351274359
TGGT1_233490	1.43529286892549	8.13277969751068	14.6700213523926	6.82133509494830e-09	2.2838193733574e-07	10.7155162406591
TGGT1_316560	3.02557517327104	3.47894544287193	14.236011975775	9.52793305647866e-09	2.76117924470915e-07	10.6917279414161
TGGT1_259720	1.32791169371953	6.90727287449214	14.5812888415265	7.29831772361865e-09	2.38107615733058e-07	10.6818413448971
TGGT1_264485	1.67852221040457	4.81454168366028	14.3331366904169	8.83441819432794e-09	2.64598066246511e-07	10.6761089786754
TGGT1_271050	-1.16785898808126	11.8436739135925	-14.7851428907996	6.25208379832557e-09	2.21797225233802e-07	10.6731035257637
TGGT1_253120	3.20095234926026	5.7400943872606	14.3619972724441	8.63900760981757e-09	2.64127571501002e-07	10.6676964462216
TGGT1_205250	-1.25918217220791	9.82647891465271	-14.6850532426441	6.74392347802061e-09	2.2838193733574e-07	10.6627477082185
TGGT1_247530	-1.83490022416834	7.22999335747793	-14.5660996669759	7.38352306493012e-09	2.3981682914893e-07	10.6610655170336
TGGT1_310290	1.94244691085397	5.16930582710389	14.3460463170409	8.74642478150553e-09	2.64127571501002e-07	10.6542163607329
TGGT1_260150	1.65957635739243	5.11934453603935	14.347948019036	8.73354283551875e-09	2.64127571501002e-07	10.6499717303734
TGGT1_289260	6.53907418869818	-0.981594833592152	15.5933847347693	3.44844750336977e-09	1.47806934785217e-07	10.6149281346568
TGGT1_293540	-1.3096163698817	6.74651285040665	-14.4867227456553	7.84664735519332e-09	2.46554653276121e-07	10.6131240706545
TGGT1_233695	-1.44444992200087	5.11872109753826	-14.2956583983614	9.09534080820516e-09	2.67662497180858e-07	10.6107461071848
TGGT1_309860	2.52229434670254	3.71690100268177	14.1191079740539	1.04417035538633e-08	2.93492190660128e-07	10.6065327196766
TGGT1_278930	-1.93193613703727	6.25594925086828	-14.418719648407	8.26842855694226e-09	2.56040999551416e-07	10.6059401847344
TGGT1_279320	1.50134372042965	7.84467705738669	14.5115208463585	7.69867725184124e-09	2.45656798090833e-07	10.5973396260589
TGGT1_257810	6.34505654547536	-1.0783784856498	15.5812090863869	3.4787620119126e-09	1.47806934785217e-07	10.5784850837942
TGGT1_208820	1.96541509872958	6.99977020622243	14.4053255494511	8.35435810014328e-09	2.5761033331581e-07	10.5402659066006
TGGT1_267670	2.61604741571486	3.85745947145117	14.0333059474642	1.11725204275403e-08	3.07610529471504e-07	10.5367632910183
TGGT1_220290	1.45310209707894	5.2397653495118	14.2318294729625	9.5590907076001e-09	2.76117924470915e-07	10.5322676432636
TGGT1_253930	1.28947930811978	6.17081479174797	14.348881415373	8.72722760365244e-09	2.64127571501002e-07	10.5284345146588
TGGT1_275660	7.94999338018255	3.31610898109227	14.6732780710008	6.80448239946629e-09	2.2838193733574e-07	10.5273383816249
TGGT1_297350	3.65128068643762	2.89239313368563	14.0983269295755	1.06138353967952e-08	2.96053088090761e-07	10.514434537954
TGGT1_306630	1.39300754457548	5.2987466019986	14.1963406760979	9.82794066768405e-09	2.80062544589249e-07	10.4933304493073
TGGT1_320540	4.9284016725384	1.13706738121304	15.0894620655157	4.98030673436632e-09	1.87559079733325e-07	10.4919173234083
TGGT1_293330	1.76033931241108	6.49125740582762	14.3097038749438	8.99659351057463e-09	2.67662497180858e-07	10.4863876969193
TGGT1_311030	1.9091300000177	7.33187683343821	14.2922606569541	9.11940435224261e-09	2.67662497180858e-07	10.4341860734565
TGGT1_304680	1.36797059981551	6.40145865949794	14.2392622759495	9.50379567355357e-09	2.76117924470915e-07	10.4259825589398
TGGT1_240880	2.43329742426182	3.62568873585148	13.88167572631	1.26028060402279e-08	3.33700386021686e-07	10.4202095171979
TGGT1_224130	-1.28894030001295	9.23686598237902	-14.3367797066881	8.80949048403032e-09	2.64598066246511e-07	10.4038664835004
TGGT1_220380	-1.32600814883371	7.20373080621721	-14.2483998404911	9.43629168027288e-09	2.75841678397737e-07	10.4015429698083
TGGT1_273740	3.51374716617485	2.41584641363998	14.0072948461905	1.14048488178317e-08	3.09957617885395e-07	10.3705276175626
TGGT1_234490	1.55050420936794	7.28885903718111	14.2121792531865	9.70695700464402e-09	2.79285203897396e-07	10.3694358966627
TGGT1_244360	6.53578496326428	-0.458051293060458	15.0039075110729	5.30687954561654e-09	1.94887817685255e-07	10.3662649888022
TGGT1_295850	-1.20489102946365	7.05916075261389	-14.1936126589757	9.84894279685784e-09	2.80062544589249e-07	10.3605065599951
TGGT1_244000	1.20478149467106	7.13419300683652	14.1943255423149	9.84344985851823e-09	2.80062544589249e-07	10.3585839973163
TGGT1_264900	-1.41713542654419	6.69995743723863	-14.1712215709118	1.00231690661232e-08	2.83912091221814e-07	10.3582204051781
TGGT1_245485	-1.47304011927415	5.38709612475906	-14.0215908856991	1.12765187450276e-08	3.08647187223452e-07	10.3540452607204
TGGT1_211000	2.66849821992454	2.9793249034952	13.8139042559913	1.33050200317707e-08	3.44798178695675e-07	10.343799497476
TGGT1_217630	1.27439525766775	6.20597196717086	14.1266434096256	1.03800340814115e-08	2.92885285972801e-07	10.3427722782665
TGGT1_293470	-1.71900243792183	6.12516867670528	-14.0833603787133	1.07397040740773e-08	2.97294535505141e-07	10.3347616924211
TGGT1_202210	5.48693531285633	1.85031061004593	14.5298391546497	7.59131002177816e-09	2.43321463329626e-07	10.3189513013517
TGGT1_290000	3.13007961598869	3.77498590033837	13.7362846819555	1.4161615432932e-08	3.63133633627604e-07	10.3050170044197
TGGT1_204395	2.60251814086706	3.82850556363342	13.7176212144074	1.43763504662083e-08	3.66070972846866e-07	10.2847779607963
TGGT1_240810	1.197610331422	7.15249738630949	14.0840379284978	1.0733971149377e-08	2.97294535505141e-07	10.2665329529276
TGGT1_205658	2.86904417153973	4.10739119418801	13.7007601545729	1.45733747867208e-08	3.68519802565245e-07	10.2629105993246
TGGT1_299250	1.34006776532156	6.0451947798331	14.0021259138325	1.14516361287707e-08	3.09957617885395e-07	10.2526842142848
TGGT1_209830	2.21387628310674	4.90725451725208	13.7973296311139	1.34831186944043e-08	3.46952927530656e-07	10.248226043865
TGGT1_269315	6.16034011170708	0.660128733441562	14.6241530843861	7.06354714793404e-09	2.33576482158832e-07	10.2284928643819
TGGT1_277060	5.26949901320262	1.26878971398892	14.5935895359858	7.23009458684917e-09	2.37953084224211e-07	10.2214337861158
TGGT1_262590	-1.75747249164535	5.31138938121264	-13.8298028623557	1.31365721181747e-08	3.41778526135919e-07	10.2182280928211
TGGT1_254760	4.28295374303305	1.48296623738364	14.2921959328739	9.11986340969262e-09	2.67662497180858e-07	10.2031575389854
TGGT1_306338B	2.04957957156711	4.71045748287015	13.7214973204009	1.43314656103309e-08	3.66070972846866e-07	10.201578323502
TGGT1_232030	-1.54266937472431	7.83580401749384	-14.03058844949	1.11965518390011e-08	3.07610529471504e-07	10.1996369825725
TGGT1_207610	3.63180954682451	2.8179027478927	13.6892074634058	1.47100534120765e-08	3.70693345984329e-07	10.1986313193962
TGGT1_293440	-1.33625428926334	7.66024584684029	-13.965267632696	1.17913385300685e-08	3.16805521976987e-07	10.1517453938095
TGGT1_278860	7.25064309370009	0.146948088348362	14.4816005123407	7.87759316580853e-09	2.46554653276121e-07	10.1462512932942
TGGT1_208730	2.26220122945933	6.77804800172302	13.9058660716474	1.23619452267829e-08	3.29712028165436e-07	10.1433640672771
TGGT1_205470	1.03016606994544	10.9870510152839	14.1034533649137	1.05710894260293e-08	2.9599050392882e-07	10.1433127017152
TGGT1_227630	2.36127710842328	6.54673661042701	13.8604685065261	1.2818138899424e-08	3.35752541494591e-07	10.1251045700009
TGGT1_263230	1.27645906856806	7.70875803163465	13.9132261883451	1.228965194556e-08	3.28984529004222e-07	10.1080802850268
TGGT1_308075	-1.92514885934266	5.08211325045702	-13.6426639543308	1.5274901910845e-08	3.82291038234436e-07	10.0980739358868
TGGT1_314362	2.50448538884646	3.44823213965216	13.4782771811983	1.74652767469129e-08	4.2687706510515e-07	10.0978723882085
TGGT1_306950	1.25217267368398	6.28977919453672	13.8293127449973	1.31417304110828e-08	3.41778526135919e-07	10.0881149520727
TGGT1_253180	-1.26175065475682	7.34391561981819	-13.871337186213	1.27072885614658e-08	3.34046276284863e-07	10.0825149165227
TGGT1_232140	4.62896655478695	1.74051173231899	13.9843726812151	1.1613918426181e-08	3.13190095418932e-07	10.0592086753898
TGGT1_239755	5.91606387725553	-0.765283356293994	14.5879980853938	7.2610204956211e-09	2.37953084224211e-07	10.0574184307715
TGGT1_299780	-1.63394211597137	8.64550016781323	-13.8830098836533	1.25893906636827e-08	3.33700386021686e-07	10.0476158422831
TGGT1_281675	2.287119918912	3.8148502034166	13.4263055414014	1.82266143936261e-08	4.38805380499012e-07	10.0423057853097
TGGT1_220340	5.06919538320664	2.00744941175482	13.8073767519639	1.33748544630457e-08	3.45383167547485e-07	9.97190613020841
TGGT1_260000	4.30629140010303	1.3429608126825	14.0057278187035	1.14190111252111e-08	3.09957617885395e-07	9.96156411077947
TGGT1_220025	3.54912800615516	2.85949493212306	13.3617923590839	1.92219294192928e-08	4.53141484503844e-07	9.95661734840474
TGGT1_268700	3.54909043852367	2.53011820233586	13.4010823786558	1.86089685676455e-08	4.4154007237777e-07	9.93973481592759
TGGT1_210260	3.29565227604825	4.50445751973283	13.3217141805048	1.9869724088115e-08	4.60977598844268e-07	9.93423017312692
TGGT1_252090	4.60506723535494	1.59104804455892	13.8737389383646	1.26829329679279e-08	3.34046276284863e-07	9.93182605004542
TGGT1_242300	6.72727364943527	-0.886642084470325	14.2942517958338	9.10529433739227e-09	2.67662497180858e-07	9.92362290056407
TGGT1_265205	4.26631932899254	2.2372228445231	13.5239329196171	1.68247710987197e-08	4.13991337338195e-07	9.92300790779422
TGGT1_288475	3.7184253929777	2.65870356312877	13.3386371177341	1.95933618978952e-08	4.5601365843891e-07	9.90328757990971
TGGT1_301000	3.89721137924176	2.80374336629658	13.2935686106118	2.03387291089707e-08	4.65941794132784e-07	9.88189690363169
TGGT1_306450	5.03529572816691	2.28574772650701	13.546992289329	1.651095638725e-08	4.09023963654314e-07	9.87608265499032
TGGT1_301170	4.74532029193592	1.83898791105831	13.6470428280729	1.52207743961846e-08	3.82245427104182e-07	9.8477804879057
TGGT1_253060	1.56596190943323	5.51443125774828	13.4510935488898	1.78591132685142e-08	4.32166886643384e-07	9.84760450259421
TGGT1_249770	1.25961616466054	6.60780004052912	13.5380864264099	1.66314001577102e-08	4.10615784974819e-07	9.82291624647311
TGGT1_268760	-1.16125757781926	8.02850975011573	-13.5876642949175	1.59727581455912e-08	3.98392206580139e-07	9.81844704802116
TGGT1_240620	3.01809596730436	3.22578892075275	13.132953881559	2.32545741716078e-08	5.10343627766095e-07	9.81038511546661
TGGT1_410990	2.04935479905429	4.15175686401616	13.1815418602625	2.23275350708073e-08	4.94453413022606e-07	9.80578150352264
TGGT1_239120	4.48696670093719	2.74240943371357	13.2389085686026	2.12840834879138e-08	4.77129086287344e-07	9.79731123776077
TGGT1_285445	5.1789926421467	2.0639621965973	13.54731889551	1.6506557285544e-08	4.09023963654314e-07	9.79727842081621
TGGT1_253480	5.52681379882099	1.81675370556328	13.7114106652575	1.44485848923026e-08	3.66632841642179e-07	9.7824735947378
TGGT1_216770	-1.28112762004691	6.80223518910164	-13.4904930978867	1.72913573618996e-08	4.24044428190477e-07	9.7754501186016
TGGT1_273595	2.02144099778918	5.30064857032781	13.3095038370411	2.00717409673249e-08	4.61806163969732e-07	9.7747385025948
TGGT1_243470	4.06420883645379	1.94165657318243	13.36422510973	1.91833495649203e-08	4.53141484503844e-07	9.75111183713682
TGGT1_311070	1.83237361493771	7.2874859914916	13.4588129501858	1.7746308143731e-08	4.30863853536166e-07	9.73136058072252
TGGT1_274040	3.97535657560105	1.54652668963858	13.4671470566953	1.76253837942826e-08	4.29354349228725e-07	9.71814582062286
TGGT1_309090	-1.59136446735179	5.39730136417542	-13.2605409389335	2.09043907116253e-08	4.7417037065415e-07	9.71220993078359
TGGT1_205265	1.54696196924829	6.99574005458788	13.4205187047875	1.83135797827311e-08	4.38805380499012e-07	9.70741871958041
TGGT1_254080	-1.13050802050339	6.81830518619967	-13.4041109854323	1.8562603947697e-08	4.4154007237777e-07	9.69842200068125
TGGT1_300230	1.77017648138689	4.73524860956838	13.1441887028386	2.30365824540609e-08	5.07082363175532e-07	9.69621193969632
TGGT1_272710	1.18563769627136	7.53301943191244	13.4215699327748	1.82977485205784e-08	4.38805380499012e-07	9.69207231057722
TGGT1_220650	3.10891913882418	2.60829378245659	13.0392353816152	2.51622771023347e-08	5.43605126727342e-07	9.68797495124915
TGGT1_275870	1.93630916439309	4.06246608551136	13.0331960981477	2.52908789117811e-08	5.43605126727342e-07	9.68438374242007
TGGT1_248370	-1.19371673479885	6.23316095485013	-13.3444333532353	1.94996627524373e-08	4.55282860686299e-07	9.67944886403462
TGGT1_244380	1.19468171924263	7.73908299787113	13.4110115058208	1.84574300594144e-08	4.40806859066014e-07	9.67666934649471
TGGT1_272680	2.23012016737749	4.24190226104277	13.0350902637647	2.52504678965486e-08	5.43605126727342e-07	9.67651935537301
TGGT1_218740	-1.93787083919374	6.29845345122489	-13.2812583695815	2.05476084744188e-08	4.67794151810133e-07	9.64325089811268
TGGT1_218210	3.26254078337856	2.86529598324061	12.9417866485671	2.73265688335779e-08	5.67336832488032e-07	9.6295083003123
TGGT1_207760	1.31025806868095	8.2730924474265	13.3462832371666	1.94698604102379e-08	4.55282860686299e-07	9.59970419482648
TGGT1_216210	1.47816296065186	7.3252892519443	13.3094024871376	2.0073427030817e-08	4.61806163969732e-07	9.59941960884333
TGGT1_299020	4.73949142809869	2.50434199927345	13.0144090632708	2.56954939374126e-08	5.49072133609976e-07	9.5640404317529
TGGT1_265430	4.10981119300822	2.36066156987238	12.9821798201615	2.64059903356009e-08	5.56123854099629e-07	9.55468595851998
TGGT1_220610	1.33243401064006	6.62398421413046	13.2256811450094	2.15199177609137e-08	4.79472091977102e-07	9.55039002077177
TGGT1_314330	1.60024469655421	4.78856897280378	12.9902797905994	2.62254515836361e-08	5.54229842254857e-07	9.5465203054028
TGGT1_203375	4.93344425120799	1.72783066315564	13.2877728455038	2.04367840951938e-08	4.66725056773987e-07	9.54028398928986
TGGT1_295100	-1.30139413744428	7.34340804556147	-13.2338788604129	2.13734285172563e-08	4.77666714385654e-07	9.53191860141342
TGGT1_213830	-1.5266953751043	5.09911059523949	-12.989614953458	2.62402196798277e-08	5.54229842254857e-07	9.51187919377169
TGGT1_268240	1.57269326373276	7.78656413906852	13.2220345186977	2.15854294280879e-08	4.79472091977102e-07	9.50710446585281
TGGT1_257360	1.73282827097124	5.93646735767572	13.1007893264345	2.38910846404478e-08	5.20775340434443e-07	9.50173076882194
TGGT1_306455	4.24125295597896	1.40589104605749	13.251898631277	2.10551960982204e-08	4.74172286223379e-07	9.49082351478686
TGGT1_244335	4.01672017676122	2.39035392090321	12.8636394925775	2.92074941563892e-08	5.91269715498317e-07	9.47756748853097
TGGT1_216460	-1.33098359890856	6.42525688371487	-13.1226444351126	2.34565719377768e-08	5.13235412339141e-07	9.47416210363575
TGGT1_296000	-2.2480776802714	3.33733468566293	-12.7274519393753	3.28280388357537e-08	6.43984598140088e-07	9.47265699958696
TGGT1_226100	1.66652725592644	5.06365238030637	12.9373151738824	2.7430587277013e-08	5.67883092975668e-07	9.46333887514709
TGGT1_307640	3.90143509965879	1.9453499659911	12.9527256401484	2.70738901514787e-08	5.65302826362875e-07	9.46225938346781
TGGT1_258570	5.05298803457221	1.50616638901096	13.3081057162223	2.00950137031164e-08	4.61806163969732e-07	9.46193429618029
TGGT1_251958	2.05664275017379	3.43229737367387	12.715644966014	3.31640241088151e-08	6.47794322373875e-07	9.4562898775674
TGGT1_239910	-1.0801600946316	7.70191791495754	-13.1500460342781	2.29238075857691e-08	5.06124428509972e-07	9.44744747028473
TGGT1_323200	5.60713823542863	0.626750174275403	13.3532830526345	1.93575352668095e-08	4.54870957330688e-07	9.41629626651953
TGGT1_275670	-1.25030480086846	7.32852362750618	-13.0981723666628	2.39436938130779e-08	5.20775340434443e-07	9.41208176285215
TGGT1_312400	1.6605018997519	4.76184993535999	12.8192771246924	3.03371019220333e-08	6.10753556050191e-07	9.4014355242232
TGGT1_409260	-1.92847571211819	4.16678303788213	-12.7014611663609	3.35725629975535e-08	6.50791221183344e-07	9.39153702336135
TGGT1_241180	-1.24614212920252	6.22609825677092	-13.0149137449699	2.56845337206343e-08	5.49072133609976e-07	9.39023327870845
TGGT1_202360	1.41402892011331	5.76655518270272	12.9598653719444	2.69103318134366e-08	5.63497721755286e-07	9.38066859503975
TGGT1_286450	-1.69454468175014	12.0910595837184	-13.2500674277612	2.10873006325394e-08	4.74172286223379e-07	9.37015559985751
TGGT1_263130	-1.87214919396493	6.63869430719904	-13.008047392836	2.58340848885711e-08	5.5042417599323e-07	9.37005514383433
TGGT1_280480	-1.47248183260867	5.79503471428005	-12.9286684799655	2.76329474548243e-08	5.6917663450475e-07	9.36304751113316
TGGT1_408600	2.91388389152346	2.23794373531245	12.6815623609044	3.41548985657272e-08	6.56347186862127e-07	9.36052188288486
TGGT1_254590	2.77676046942022	2.98343551393901	12.5903995196613	3.6965804141443e-08	6.90910733160269e-07	9.3519780766361
TGGT1_291170	1.95916781033932	4.18113287008577	12.6108273319299	3.6314894389297e-08	6.83992907724182e-07	9.30175344982333
TGGT1_289216	3.31117243710255	1.83895866644949	12.7129693587078	3.32406774617136e-08	6.47794322373875e-07	9.29432001957083
TGGT1_257720	8.0784972666235	2.0237324664365	13.0467595410559	2.50030432542117e-08	5.42202492883618e-07	9.28591159058391
TGGT1_290650	1.20911881260076	6.48429275954006	12.9202311627202	2.78319625040531e-08	5.6917663450475e-07	9.28320597923753
TGGT1_247550	0.95166742134865	9.07369685451646	12.9981935951619	2.60503491395094e-08	5.53418463696321e-07	9.25648995848351
TGGT1_254430	3.19629255293709	2.71893070700262	12.4969181775573	4.01094826605215e-08	7.32728419673538e-07	9.25169249862263
TGGT1_310060	-1.56250493638653	5.33640939771579	-12.7285973775955	3.27956397782419e-08	6.43984598140088e-07	9.24670835974176
TGGT1_278070	5.83401590624356	-0.809655409553174	13.2574926933178	2.09574479640518e-08	4.7417037065415e-07	9.23735504558679
TGGT1_201400	1.20835812823625	8.02493013902189	12.9219288674053	2.77917938744903e-08	5.6917663450475e-07	9.23222343977493
TGGT1_252310	-1.96790648594583	4.22389819568645	-12.5183102510723	3.93654404595248e-08	7.22820700699014e-07	9.22298911555126
TGGT1_218192	3.85449684671417	3.34087400584616	12.4237329716625	4.27719990345489e-08	7.62384802303619e-07	9.20920028890704
TGGT1_256760	0.899421508057408	9.21601535163197	12.9453667745304	2.72435926180771e-08	5.67225569381503e-07	9.20210379278892
TGGT1_266940	1.22625918032756	6.41738332598261	12.7941110246397	3.09988143104454e-08	6.18959931641353e-07	9.17301295066617
TGGT1_227330	-1.07026649558925	7.41583780504087	-12.8343654333985	2.99476988293217e-08	6.04579511173156e-07	9.17247987141487
TGGT1_269700	-1.01032568673668	8.26490968233781	-12.8643275716748	2.91903352605576e-08	5.91269715498317e-07	9.1704574299365
TGGT1_224460	-1.45811021830912	9.73152612164887	-12.9180994103759	2.78824897581692e-08	5.6917663450475e-07	9.15918453518369
TGGT1_252860	4.88079930265072	1.35404098575728	12.8988626539649	2.83429499026603e-08	5.76964562363904e-07	9.15793542643585
TGGT1_205670	-1.20951689489737	5.92644130923772	-12.7260074583212	3.28689456905108e-08	6.43984598140088e-07	9.1547639837339
TGGT1_288510	1.10284436518589	5.6764196826851	12.7083476509517	3.3373535567796e-08	6.48653717897481e-07	9.15199265107307
TGGT1_219570	3.28975530867233	1.98260641512932	12.4905802121916	4.03328296990716e-08	7.33214724977153e-07	9.14891660853847
TGGT1_305470	1.23089921252028	7.27232079507078	12.7948658056797	3.09787430898372e-08	6.18959931641353e-07	9.14100047632967
TGGT1_269720	1.23200915342601	6.29369695787608	12.7429536843113	3.23924826350948e-08	6.39795305668306e-07	9.13378864281461
TGGT1_243400	1.42860093555171	5.665326562313	12.6738131434366	3.4384621034275e-08	6.56347186862127e-07	9.13368068442714
TGGT1_221690	1.24723872106479	6.64591560271349	12.750839930521	3.21732991865358e-08	6.37188266816269e-07	9.1225901967381
TGGT1_229720	2.01982381823519	5.44683234697543	12.5826152331365	3.72171470626233e-08	6.93833955953192e-07	9.10789304895778
TGGT1_286570	4.86301404928035	0.251534576271987	12.9724787436382	2.66239842590266e-08	5.59103669439559e-07	9.10606640354053
TGGT1_220840	4.90214182046164	0.59672783713989	12.9271229162185	2.76692881182789e-08	5.6917663450475e-07	9.10329175518548
TGGT1_312270	-1.04199953631203	7.93284829194744	-12.7728667245692	3.1569544750273e-08	6.26929981073355e-07	9.09995640291106
TGGT1_202930	2.33388161202002	3.38307172982313	12.2778821181018	4.86648448589644e-08	8.36806320539557e-07	9.07646397570076
TGGT1_267390	1.17219208077742	6.43053351475454	12.6733617689859	3.4398053170251e-08	6.56347186862127e-07	9.06109030966852
TGGT1_362420	-1.60026423098199	4.83734701632749	-12.4409449063177	4.21290971655083e-08	7.56420994581897e-07	9.05828644618298
TGGT1_207480	1.33846991708746	7.25912699329339	12.68745728224	3.39812558699434e-08	6.55237514241548e-07	9.04331226714452
TGGT1_262010	-1.24403462029763	6.23572316436223	-12.6301077036194	3.57118867656665e-08	6.76120384672256e-07	9.0409113316877
TGGT1_243190	5.06934846883634	0.761392514278916	12.8044603704367	3.0724822752684e-08	6.16859902957734e-07	9.0341790436632
TGGT1_305530	2.31580215990733	3.55682583594824	12.2183947327026	5.13150201404898e-08	8.7380652228978e-07	9.01337371921331
TGGT1_217020	-1.29201727433968	7.8205277160349	-12.6743809736658	3.436773141553e-08	6.56347186862127e-07	9.01267582043107
TGGT1_270170	-1.43668448851875	5.25066538358767	-12.4516394557831	4.17348932840152e-08	7.5308296325823e-07	8.9989096578834
TGGT1_212180	3.51417498859455	2.71816318531452	12.2039242888457	5.19829690732944e-08	8.81418881641845e-07	8.99478303814888
TGGT1_209810	3.81761584724508	2.09103791674618	12.312167101886	4.72048482274467e-08	8.17504325797336e-07	8.99461016370891
TGGT1_249710	1.81100704655438	4.59513837064121	12.3296430831131	4.64789013150709e-08	8.14551105061243e-07	8.98737345160557
TGGT1_219520	0.988493421220679	7.71651497780416	12.6395784272054	3.54196502829263e-08	6.72329361734092e-07	8.98692657524629
TGGT1_272430	4.88385641529675	1.3291677562698	12.6641258062975	3.46741474448793e-08	6.5989236856036e-07	8.98648640603441
TGGT1_266065	4.22657441887193	1.45109520456474	12.5216859438105	3.92493972559631e-08	7.22505277447301e-07	8.97649530759251
TGGT1_203930	-1.22064420690198	7.40031388667975	-12.6159745982781	3.61528415764251e-08	6.8270017116412e-07	8.97294511093176
TGGT1_315690	1.18191156115087	5.94307497843147	12.5320602048197	3.88950759810763e-08	7.17790947650772e-07	8.9660680743848
TGGT1_278580	2.23346106929284	3.8662540006107	12.1913318205837	5.25718706938819e-08	8.87286907692585e-07	8.96308046418779
TGGT1_204490	1.26043343198375	5.89124135145902	12.4941798726187	4.02058150368211e-08	7.32728419673538e-07	8.93804159804985
TGGT1_257420	2.78387125079157	4.05407372995968	12.1642934871263	5.38608236264494e-08	9.04351012180336e-07	8.93676803492149
TGGT1_253860	1.3957915560703	7.95497317218326	12.5954267615862	3.68044563994471e-08	6.89658890685024e-07	8.93582772067394
TGGT1_228680	2.78806011497571	3.12899263837633	12.1058293284014	5.6766013214915e-08	9.32238257471009e-07	8.9324011972118
TGGT1_210320	2.8277875043979	2.33732125254786	12.1432552196444	5.48873362150146e-08	9.13705360044025e-07	8.92823847237825
TGGT1_225070	2.41567865545635	3.1256918511503	12.086577414829	5.77593380377995e-08	9.40100762539507e-07	8.91410312121815
TGGT1_267130	2.07060410701809	4.09240868840052	12.1623626431116	5.39541654776446e-08	9.04351012180336e-07	8.90792742170145
TGGT1_257945	4.20377406969164	1.84104749680639	12.2959566173454	4.78891772088949e-08	8.25410629817462e-07	8.90598434101497
TGGT1_207730	5.74325830868664	-0.852601862528844	12.7735459332748	3.15511231677002e-08	6.26929981073355e-07	8.90511146241971
TGGT1_410070	-1.31898703981738	6.05802664867658	-12.4588156129713	4.14726116992651e-08	7.50202589847103e-07	8.90050665819792
TGGT1_262510	1.17651937735075	5.93957987252513	12.4382140465893	4.22304003543259e-08	7.56420994581897e-07	8.87902971707183
TGGT1_279315	2.31186629071879	3.33762359001611	12.0553717717622	5.94094970729397e-08	9.54207922217678e-07	8.87839805587169
TGGT1_214290	-1.14506717239066	7.50864617288344	-12.4995453183528	4.0017295167264e-08	7.32728419673538e-07	8.86207458396646
TGGT1_266040	5.33292006202194	0.774771245509697	12.5430467666569	3.85236038118855e-08	7.1273543457534e-07	8.85725257458733
TGGT1_235010	3.98924136596222	1.49470775240159	12.3121220398476	4.72067358355878e-08	8.17504325797336e-07	8.85247673226857
TGGT1_239430	6.20472779502386	-0.376344766510385	12.5986525938254	3.67013249227577e-08	6.89494299577154e-07	8.85064397089253
TGGT1_307603	5.18988683533924	-0.601268442711131	12.6946466058623	3.3770773912393e-08	6.52901628972932e-07	8.84817617190499
TGGT1_277860	1.68896516079168	4.28524743911842	12.1344306439514	5.53241790263807e-08	9.16800681008595e-07	8.84525760670737
TGGT1_294808	5.35536298080964	2.23191155140895	12.2235424965915	5.1079640537562e-08	8.72172927683419e-07	8.8388737569001
TGGT1_204540	1.15934250707737	7.63653579607217	12.4770974697407	4.08124344739062e-08	7.40092484206717e-07	8.83845386594999
TGGT1_410610	3.56708892236877	1.66714916859294	12.1647810882656	5.38372793357287e-08	9.04351012180336e-07	8.8098685070665
TGGT1_269640	3.02782913244361	2.13665977837851	12.0343223584711	6.05512890396115e-08	9.68290635233e-07	8.80773801795124
TGGT1_210482	5.30536393696392	-0.0133529357171758	12.5467026813316	3.84008426499358e-08	7.12677506367392e-07	8.80713417197914
TGGT1_264178A	5.53408718252779	-0.184916439612563	12.5460433008635	3.84229525874045e-08	7.12677506367392e-07	8.80172092096378
TGGT1_289340	-1.90561309525754	4.39398146534215	-12.0752967989902	5.83500781807979e-08	9.47605269656159e-07	8.79434492390707
TGGT1_202980	1.11998017827749	7.83639747973624	12.4307791423983	4.25075383782568e-08	7.59523448577751e-07	8.78872463615403
TGGT1_312065	1.49167188981541	8.03222300430891	12.4386301804631	4.22149466038198e-08	7.56420994581897e-07	8.78666168977515
TGGT1_311840	-1.06717132037069	7.22150488936409	-12.4079786995654	4.33697444032088e-08	7.71158374935888e-07	8.78534722446742
TGGT1_295390	3.21797688927573	2.34630558486876	11.9863043660059	6.32455568789131e-08	1.00042971790281e-06	8.7842428616626
TGGT1_221890	2.32028044184833	3.423471614493	11.9539423588122	6.51341988449745e-08	1.01709556657922e-06	8.78170818753572
TGGT1_223970	1.14253218935306	5.27943231089063	12.2502346938742	4.98776921073555e-08	8.54787819003163e-07	8.7813060334754
TGGT1_253070	1.15174565614941	6.3386785798402	12.362455802378	4.51482172313145e-08	7.98893877788005e-07	8.77782103742158
TGGT1_267490	1.81443725600252	3.61972001917733	11.9642108401389	6.45284233402939e-08	1.01196076774864e-06	8.7675790741087
TGGT1_295980	-1.19841034483323	6.29880836516555	-12.3372020490775	4.61686457339229e-08	8.11058805344973e-07	8.76303820320929
TGGT1_272540	3.06256411481021	3.88590214959484	11.9312657772585	6.64938244644334e-08	1.03390823231081e-06	8.74532929421867
TGGT1_293890	4.34063436678371	1.18403953409947	12.3139827669744	4.71288593893796e-08	8.17504325797336e-07	8.7303175396015
TGGT1_276960	2.69185895976884	4.45550874571073	11.986560365546	6.32308544690794e-08	1.00042971790281e-06	8.72505817122828
TGGT1_251750	4.54024353595485	0.998674500740128	12.3534235235161	4.5510360107826e-08	8.01420991971066e-07	8.71977960188737
TGGT1_237290	1.01336942819433	7.47854069042893	12.325499058343	4.66499461183565e-08	8.15592837877868e-07	8.70132928220352
TGGT1_267642	3.15574565267888	2.71826788988303	11.8563709610137	7.12063560537748e-08	1.08865282435353e-06	8.69884091776556
TGGT1_225360	1.86645320677892	4.58049198382222	12.006738274389	6.20835301255532e-08	9.88467185528416e-07	8.68955883451375
TGGT1_311260	-1.45435135451479	5.13504467783531	-12.0931245892877	5.74194400204653e-08	9.39961346472192e-07	8.68229856925027
TGGT1_259155	4.90027535302815	0.274926672290774	12.3587808477619	4.52951852168248e-08	7.99558486870907e-07	8.67883572174725
TGGT1_313318	3.17648587944446	1.92016509829825	11.9227605649227	6.70116442289035e-08	1.03754469496785e-06	8.67799487083342
TGGT1_261510	1.16035216576149	5.90494449499802	12.2162278365858	5.14144505452388e-08	8.7380652228978e-07	8.67361356061244
TGGT1_238915	4.27585778178125	0.814042286706496	12.3175358477661	4.69805383283571e-08	8.17504325797336e-07	8.6690991861287
TGGT1_288220	4.29862609331376	0.878978446984516	12.3011371721928	4.76693219348371e-08	8.23563604491229e-07	8.6671507919964
TGGT1_308020	-1.17692326156613	9.35038267700322	-12.3664019700302	4.49909758945857e-08	7.98043815139885e-07	8.66525350570909
TGGT1_300120	-1.30660871229394	6.67081360665602	-12.2487329452123	4.99444990030584e-08	8.54787819003163e-07	8.65872665237018
TGGT1_214510	2.32070278219338	3.63426195592686	11.814198881868	7.40175107939297e-08	1.11991711983859e-06	8.63740268187865
TGGT1_257670	3.29785504496471	3.13482613891205	11.7760282780594	7.66653393362253e-08	1.15519649457553e-06	8.6358331452919
TGGT1_286140	-1.18089796892579	5.32334902055219	-12.0644022769745	5.89267929839612e-08	9.53679499168183e-07	8.61274470333671
TGGT1_316610	1.35111560063555	5.94693528588298	12.1442678289806	5.48374476245069e-08	9.13705360044025e-07	8.60726383483412
TGGT1_280510	2.59894052245552	2.50637049103755	11.7355496795522	7.95853235205591e-08	1.18454082339765e-06	8.58889148628366
TGGT1_310410	1.3577573264135	5.20846099888526	12.0227429564148	6.11894736677926e-08	9.76359549266874e-07	8.58562721558314
TGGT1_217500	-1.08565026855476	5.93386926523046	-12.1099811457405	5.6554221378692e-08	9.31335949079159e-07	8.57596217484723
TGGT1_263690	1.12892134976995	5.50285944416355	12.0594368223073	5.91916834836951e-08	9.54207922217678e-07	8.56909289727909
TGGT1_313430	1.20542364244391	8.00964759527376	12.199357063986	5.21957337025157e-08	8.82977828467558e-07	8.56358332044779
TGGT1_201630B	-1.30953501935588	6.51346146207777	-12.1381428209084	5.51399596678902e-08	9.15824602847595e-07	8.56304344940951
TGGT1_294225	1.97818534580711	3.42006853212583	11.7206040848978	8.06935871918089e-08	1.19374237894279e-06	8.56021747637671
TGGT1_219530	1.43525563578564	5.13588977594093	11.9762733658809	6.38245654246935e-08	1.00740804346363e-06	8.55626267079261
TGGT1_248730	2.96770683909822	2.94959991440813	11.6747631891041	8.41979599784032e-08	1.23016824450711e-06	8.54324971275018
TGGT1_248870	-1.16917890432117	5.85654241816643	-12.0633071705221	5.89851031231553e-08	9.53679499168183e-07	8.54236698982657
TGGT1_313950	1.77682314208744	3.61903160786463	11.711521221906	8.13752360803992e-08	1.19897222837814e-06	8.53072509957288
TGGT1_216180	-1.61771144841751	7.48463577377607	-12.1480372924762	5.46521658260465e-08	9.13705360044025e-07	8.53059614823328
TGGT1_227320	1.17058912940505	6.49606152608019	12.109403655497	5.65836290901952e-08	9.31335949079159e-07	8.53033822637085
TGGT1_234570	4.1122234804559	1.63270251035927	11.8569892238378	7.11660099513442e-08	1.08865282435353e-06	8.51518941724849
TGGT1_315140	1.16168583225965	6.45588139895519	12.0894158005224	5.76117167324652e-08	9.39961346472192e-07	8.51309198971777
TGGT1_283890	1.6396561965453	4.98880378368976	11.8921856801978	6.89093633670459e-08	1.06328618834272e-06	8.5079011117121
TGGT1_311700	6.26106347051823	-0.0623830856388777	12.0892149084248	5.76221515078738e-08	9.39961346472192e-07	8.50261412299971
TGGT1_306895	-1.33802201521067	5.75851105446316	-11.9966104893518	6.26565663416063e-08	9.95422145270562e-07	8.49696414849757
TGGT1_207240	-1.24912343690033	5.6028127443917	-11.9682943349794	6.42892148895517e-08	1.01037759658676e-06	8.48518165478977
TGGT1_235650	3.36871711393398	1.99202584062895	11.6730228894504	8.43341941020887e-08	1.23016824450711e-06	8.46643049349208
TGGT1_223700	3.9472132724839	1.08005441342607	11.9558069099977	6.50237477488037e-08	1.01709556657922e-06	8.46565976567637
TGGT1_205210	2.60228827580293	3.19481799961075	11.5927637691953	9.08828621245615e-08	1.30088986770118e-06	8.46181514644336
TGGT1_257390	1.40148568126342	6.99392815690985	12.056820934065	5.93317489887914e-08	9.54207922217678e-07	8.46068265877083
TGGT1_239410	1.13654464979304	8.71988327791914	12.1192603424201	5.60839489527392e-08	9.27288459155244e-07	8.45793668214504
TGGT1_272370	-1.13160007674754	7.9207142635739	-12.0510773011644	5.96405433594739e-08	9.55818181734727e-07	8.42440993833492
TGGT1_231090	5.23988292170663	1.00858007721751	11.9428309491769	6.57966216872242e-08	1.02524885136511e-06	8.41950758315497
TGGT1_289222	3.55574803805536	2.70345384561957	11.5202695649057	9.72709620672261e-08	1.35978755719142e-06	8.39119144177652
TGGT1_203900	4.46886979199082	1.22020122159935	11.8576396517868	7.11235914648559e-08	1.08865282435353e-06	8.37966926474485
TGGT1_359770	2.38703230214512	3.74108610330619	11.5371440510365	9.57419192852219e-08	1.35073734775367e-06	8.36790466069628
TGGT1_215195	3.724983613194	2.73592237288037	11.4958255979274	9.95327938298968e-08	1.37242576850733e-06	8.3671578849916
TGGT1_250920	3.98753953540877	2.81085127211146	11.4880775877711	1.00261516518328e-07	1.37823022565998e-06	8.36012194964922
TGGT1_297065	3.37540799938548	1.51440325654664	11.6374636164801	8.71705564264209e-08	1.26648593710593e-06	8.35643037589401
TGGT1_294380	1.24926177604069	6.58386090539512	11.9255994487801	6.68383233349097e-08	1.0370583162028e-06	8.35048473040279
TGGT1_225320	-2.06278580545569	5.64722139508606	-11.7826045617476	7.62019629991441e-08	1.15058666445815e-06	8.34553324030133
TGGT1_360830	-1.70330514534106	8.20674531107831	-11.9692194624161	6.42351545857463e-08	1.01037759658676e-06	8.33185535378306
TGGT1_314770	1.32911498297675	5.07968451988656	11.7239804756375	8.04417691592819e-08	1.19374237894279e-06	8.31646216593682
TGGT1_209410	3.18807886315419	2.27878801515293	11.4519463389645	1.03736584079833e-07	1.40390177121374e-06	8.30835478493465
TGGT1_305560	1.95480084874788	4.99121044159135	11.6681355434985	8.47180584603964e-08	1.23330591878203e-06	8.307535315626
TGGT1_286230	1.0415739392719	6.93440825434013	11.8912999464876	6.89651961240353e-08	1.06328618834272e-06	8.30164089918037
TGGT1_216610	2.88052080752689	2.45421826345199	11.4175606977037	1.07164649359216e-07	1.4422822422047e-06	8.29464175486107
TGGT1_230830	1.65997487952031	4.65904973091025	11.5946817095431	9.07201236092971e-08	1.30088986770118e-06	8.27320317382398
TGGT1_254300	1.14894879940606	7.43744167629187	11.8652486900109	7.06293795374357e-08	1.08665159086227e-06	8.26188027297383
TGGT1_357600	-1.68620356021965	4.01912254505696	-11.4672732754361	1.02246843539583e-07	1.39667277119117e-06	8.25556015377405
TGGT1_204325	2.9515207111796	2.27592497849119	11.386418617167	1.103749238838e-07	1.47462512567242e-06	8.25400149512967
TGGT1_306400	1.10964560646349	7.32914645072012	11.8428571165802	7.20944253558611e-08	1.09763762604299e-06	8.24306669420488
TGGT1_246640	5.22222669742442	-0.584059967413009	11.8435908397176	7.20459028083e-08	1.09763762604299e-06	8.23857967046981
TGGT1_291880	-0.924617221895524	7.31726572736034	-11.8377036283402	7.24362307833266e-08	1.1005488036685e-06	8.23807544533233
TGGT1_290840	0.966776619287711	7.11427908567927	11.827364388469	7.31272659044574e-08	1.10874286147256e-06	8.23385992171325
TGGT1_254610	1.00966154605403	5.79278089756568	11.743123969563	7.90299450262011e-08	1.18108555879648e-06	8.22518954108041
TGGT1_313650	3.98957089135312	2.30049721062706	11.3659845287221	1.12537627810839e-07	1.49962707805048e-06	8.21057293704417
TGGT1_310300	1.40573740684671	6.13425520807509	11.7480546228185	7.86706566939065e-08	1.18038643090221e-06	8.21043234649601
TGGT1_216190	1.34627200772058	5.95447517758527	11.7212551879211	8.06449605085074e-08	1.19374237894279e-06	8.19816201183649
TGGT1_304730	1.50718762986267	6.524212378525	11.7473587746462	7.87212549964942e-08	1.18038643090221e-06	8.18435398510567
TGGT1_226350	1.1229170726517	5.76790857955296	11.6871992567511	8.32313222883849e-08	1.21894690036777e-06	8.17644280675593
TGGT1_228350	1.19856892159353	6.38638050709242	11.736731883728	7.94983627940496e-08	1.18454082339765e-06	8.17619913447592
TGGT1_258120	3.86308460258775	1.21254551091902	11.5293239834997	9.64472686571241e-08	1.35545507566589e-06	8.16845169376617
TGGT1_267875	2.1151935617785	3.03907382401934	11.2658090262866	1.23822085349733e-07	1.60258513949346e-06	8.15392919898248
TGGT1_209200	-0.983046226636766	6.5030313289193	-11.7088507653025	8.1576827706652e-08	1.19952405810908e-06	8.14236115865659
TGGT1_316635	1.71599648100521	4.0452843258503	11.3612667311844	1.13043416120213e-07	1.50203870001185e-06	8.14037656347364
TGGT1_223140	0.938337542324867	7.67958511311976	11.7459796046219	7.88216445375312e-08	1.18038643090221e-06	8.13874498557369
TGGT1_305090	-1.50152322870466	4.96179143033699	-11.499016053932	9.92343844945619e-08	1.37089769732752e-06	8.13758499388477
TGGT1_290920	1.08152720555604	6.97555225173906	11.7174132689157	8.09323464193376e-08	1.19485573259095e-06	8.13051648182338
TGGT1_282000	2.55167445861224	2.48274692593061	11.2267826992304	1.28543528533135e-07	1.63657858278772e-06	8.12261913279382
TGGT1_225370	4.91566996960426	0.722938605366829	11.5876463243588	9.13186237179399e-08	1.30088986770118e-06	8.12123194749519
TGGT1_314482	6.23813482681419	-0.360768055677529	11.6133372037147	8.91534901221504e-08	1.2901657540845e-06	8.11806900323205
TGGT1_275970	1.67377474947707	3.92532331318103	11.3180318699346	1.17794405076581e-07	1.54549643141769e-06	8.11261622916828
TGGT1_233770B	2.65134424642595	3.03884334800053	11.2120657896212	1.30374091094858e-07	1.65125451944752e-06	8.10758089506249
TGGT1_304690	1.77079223601439	4.35404742535443	11.3539559686995	1.1383204142174e-07	1.50977233885676e-06	8.0903131944744
TGGT1_288250	1.38810492765806	4.74529135243936	11.4345597637805	1.05454909511614e-07	1.42451844493693e-06	8.09027831493934
TGGT1_253340	5.99626327091957	-0.480562984062804	11.5890194409163	9.12014790519473e-08	1.30088986770118e-06	8.08308472552375
TGGT1_269850	3.10810494068833	2.4614943021121	11.1775269967034	1.34781527347965e-07	1.68784508546462e-06	8.07001621324321
TGGT1_314750	1.08906775658412	6.03169633914925	11.6045908001909	8.98843227733944e-08	1.29561071169224e-06	8.06862255969178
TGGT1_270260	2.56115343443748	3.98490825449893	11.2461362706809	1.26178301860463e-07	1.61773864911625e-06	8.06498266858572
TGGT1_259700	-1.5306914082488	5.49018875761511	-11.506634466084	9.85257160238467e-08	1.36627311708211e-06	8.06483574905738
TGGT1_267740	-0.991014393443481	6.08439422721312	-11.5987187424609	9.03786048808281e-08	1.30017095367931e-06	8.0623953349165
TGGT1_309600	-0.861858908055262	8.47460769000546	-11.6925019788658	8.2822795940107e-08	1.21539958379579e-06	8.05428523454677
TGGT1_268270	4.82062736390853	0.151024736504408	11.5316344222936	9.62382916537133e-08	1.3551241529968e-06	8.0410197598668
TGGT1_225890	1.22725006639181	6.68423486951548	11.6142725955662	8.90757108079555e-08	1.2901657540845e-06	8.0407570826947
TGGT1_277840	-1.27085810171167	5.76506174539947	-11.5198014708514	9.73137510141095e-08	1.35978755719142e-06	8.02774537136581
TGGT1_288530	1.04002818316474	6.39975409125528	11.5878617222188	9.13002367565109e-08	1.30088986770118e-06	8.02571385951807
TGGT1_280810	-1.81342622065263	3.43447367117676	-11.158064227575	1.37335692244846e-07	1.69822206247941e-06	8.02144649061754
TGGT1_259020	4.21492802330368	1.25789966942511	11.3648716838098	1.12656713991477e-07	1.49962707805048e-06	8.01730731181288
TGGT1_271260	-0.9651353035429	7.25007992877303	-11.605258625334	8.98282933403186e-08	1.29561071169224e-06	8.01137680055443
TGGT1_288710	0.996501199481769	5.79255318414296	11.5199204475551	9.73028733103884e-08	1.35978755719142e-06	8.00451801471972
TGGT1_252070	1.06598672973289	5.64991874727296	11.5004068720478	9.91046008015347e-08	1.37089769732752e-06	8.00329296601381
TGGT1_219170	-1.21232578561418	5.88136312904099	-11.5111207411409	9.81109555277275e-08	1.36627311708211e-06	8.00296755686412
TGGT1_209580	-1.33013727827047	5.54309595617632	-11.4580719224471	1.03138402795898e-07	1.40390177121374e-06	7.99828101024547
TGGT1_224230	1.44525409385844	5.2530467587836	11.42344432999	1.06569523741989e-07	1.43691896587907e-06	7.99763918279329
TGGT1_236670A	2.39533010945025	3.63856718239084	11.1300584424045	1.41102984961095e-07	1.73599429982438e-06	7.98112320782951
TGGT1_273750	3.57871285159588	1.43478143415203	11.2151101857681	1.29993120736932e-07	1.64928771934982e-06	7.96920779783696
TGGT1_217555	-1.42668387336173	6.2993775225729	-11.508489665628	9.83539721503949e-08	1.36627311708211e-06	7.96821189258443
TGGT1_214600	1.19351715195236	7.92376609525444	11.5650302915736	9.32715984429436e-08	1.32355114839035e-06	7.95005871790591
TGGT1_202580	1.66944023179308	4.68042495266831	11.265152749528	1.23899918420061e-07	1.60258513949346e-06	7.94558972295055
TGGT1_286600	-1.04016232730294	7.71670166290761	-11.5524186344295	9.43801875228152e-08	1.33410137411361e-06	7.94465750954911
TGGT1_211290	-1.26020586484759	8.35511902044117	-11.5783563494014	9.21154554042193e-08	1.30968822586388e-06	7.94438053843355
TGGT1_253460	2.86492760517902	4.16127632949262	11.1271911273171	1.41494933220885e-07	1.7378907092071e-06	7.93790069707441
TGGT1_239855	2.3900867919362	3.29964378274822	11.0550673921882	1.51750250616126e-07	1.84217746096786e-06	7.93719775337393
TGGT1_280605	4.46872266294879	1.21334730289702	11.2944283118223	1.20478649678759e-07	1.57224637830781e-06	7.92580895826052
TGGT1_230990	1.65449254791047	5.02950438326346	11.3016524801978	1.19650165271067e-07	1.56422792093195e-06	7.92326821324846
TGGT1_295680	1.12603860660749	6.50926440381716	11.485348878157	1.00519527952486e-07	1.37823022565998e-06	7.91935797201932
TGGT1_318738	5.05968039164209	-0.423427357219498	11.4151372119358	1.07410824732619e-07	1.44293806460658e-06	7.91409783676264
TGGT1_295110	-0.957976349484275	8.83449586753381	-11.5606157939311	9.36580352647041e-08	1.32645915060941e-06	7.90758883541921
TGGT1_271270	-1.01928108788811	7.76174850202642	-11.5094484561841	9.82653393299133e-08	1.36627311708211e-06	7.90027926860395
TGGT1_236240	-0.972631214625713	6.46347206116397	-11.4552120573936	1.03417212774487e-07	1.40390177121374e-06	7.89260230438001
TGGT1_277920	-1.19256181967741	5.46258635141422	-11.3358513528304	1.158106735019e-07	1.53046003969599e-06	7.88039581222536
TGGT1_309950	1.38139873747557	5.31952520725198	11.3194526525644	1.17634901671196e-07	1.54549643141769e-06	7.88027920626038
TGGT1_408800	-1.6598008974685	7.74302592300856	-11.4864449472038	1.00415803878097e-07	1.37823022565998e-06	7.8740633363894
TGGT1_209045	4.29167733830729	1.10589786270814	11.2285400816153	1.28326795604849e-07	1.63657858278772e-06	7.86178440792907
TGGT1_229370	1.82216314014908	6.27063571523296	11.3946084950037	1.09520742341129e-07	1.46589301287358e-06	7.86145879703338
TGGT1_252300	5.53691048707641	0.225163081326349	11.2611239253578	1.24378886130894e-07	1.60593798559112e-06	7.84875083361274
TGGT1_297745	1.12664531720628	7.75083254087968	11.4540368957657	1.03532015533836e-07	1.40390177121374e-06	7.84592385955785
TGGT1_269075	1.70660115592792	3.94037984893492	11.035472192694	1.546729517297e-07	1.86219099051178e-06	7.83025313223667
TGGT1_270540	1.38729659955937	4.76630593077019	11.1767708782516	1.34879793364989e-07	1.68784508546462e-06	7.8295606380051
TGGT1_278530	0.993311965338479	8.31188841715205	11.4533447335977	1.03599697886825e-07	1.40390177121374e-06	7.82335816609056
TGGT1_233330	5.19886834099356	-0.107341911957862	11.2524137983431	1.25421229469629e-07	1.6136942693029e-06	7.81244684710254
TGGT1_311180	-1.04917439189024	5.88063247195127	-11.3211478793884	1.17444892597088e-07	1.54549643141769e-06	7.80641796061162
TGGT1_289290	1.04299231794965	6.26830732267131	11.342666873744	1.15061494244819e-07	1.52331413032815e-06	7.78808624049234
TGGT1_315123	1.06203574936067	5.43927627851836	11.2574976454423	1.24811704759349e-07	1.60868419467605e-06	7.78714922429622
TGGT1_246110	5.76316790207134	0.497938039719099	11.1635898870828	1.36605278058985e-07	1.69205317297468e-06	7.78565250159808
TGGT1_213480	3.03000541514593	2.10650463127443	10.8836461885872	1.79484927756851e-07	2.06238341516834e-06	7.77554425195071
TGGT1_233380	-0.846438657851881	9.91902609448224	-11.4773713044367	1.01277958290564e-07	1.38602868761693e-06	7.77451978759173
TGGT1_300980	5.08343513004896	-0.410251314479831	11.2351220896936	1.27518550091998e-07	1.62920553159497e-06	7.77222335745705
TGGT1_278080	5.75263600777077	-0.603652289813957	11.2184588241648	1.29575463793716e-07	1.64684780765996e-06	7.76952521889221
TGGT1_202285	5.84250432635297	-0.560223263522819	11.2057516142827	1.3116807893132e-07	1.65843654122853e-06	7.76545482530688
TGGT1_247010	3.69489615283338	0.824620669526329	11.1442258559989	1.39183471354835e-07	1.71816352814381e-06	7.76345429877076
TGGT1_267540	1.56861006782038	4.93626129220803	11.1163281261092	1.42990534609359e-07	1.74453226531752e-06	7.74711957879727
TGGT1_246490	-1.01111349059384	7.14373081271655	-11.330213146284	1.1643441540604e-07	1.53592546532011e-06	7.73898602293392
TGGT1_305480	1.23962392178642	5.46199454336682	11.1995818083207	1.31948950978658e-07	1.66542821027985e-06	7.73176055520962
TGGT1_289590	1.94206915963824	3.99997739208833	10.9372399891597	1.70268436452865e-07	1.99232932282876e-06	7.73037532205439
TGGT1_315127	3.7983557125631	0.691467313435886	11.1239620229127	1.41937742088184e-07	1.74040439459807e-06	7.72595500554517
TGGT1_209800	1.01627046970365	6.84767152749203	11.3031407752377	1.19480248515597e-07	1.56422792093195e-06	7.72092897502378
TGGT1_230580	1.09466647084456	6.15077583673857	11.2483010582113	1.259166724556e-07	1.61722151547543e-06	7.70173448122678
TGGT1_278815	-1.06879317359221	6.98879958143221	-11.2810597001405	1.22028154155908e-07	1.5839817949758e-06	7.69438620863743
TGGT1_208780	1.01368908321976	5.605257819334	11.1876863376949	1.33468667127009e-07	1.67592615011028e-06	7.69229954241201
TGGT1_310150	-1.19148111979176	7.45452042959899	-11.2908589909881	1.20890269007766e-07	1.57480585723485e-06	7.68930134142902
TGGT1_226410	0.825428086592117	10.2024941117006	11.3999623673683	1.0896620332477e-07	1.46114681449067e-06	7.68523781413723
TGGT1_283500	4.07552125451686	0.831890411100865	11.0373312560999	1.5439307680745e-07	1.86188878763836e-06	7.66921469513379
TGGT1_259270	2.51753330740841	3.21117132467963	10.7731965470884	2.00219831349266e-07	2.23731884938904e-06	7.66631949847987
TGGT1_248720	1.26340397242096	7.91825135798986	11.2826058022103	1.21847857442439e-07	1.5839817949758e-06	7.66573599024054
TGGT1_232720	-1.00602856099374	5.82500031142385	-11.1746608759881	1.35154420426299e-07	1.68839060594084e-06	7.66195799079442
TGGT1_315450	3.31545390633209	1.97445342872047	10.7801991833729	1.98831350385262e-07	2.22861887824463e-06	7.66168282126239
TGGT1_240580	2.60758117360386	2.44208259437653	10.7368966592795	2.07586816118407e-07	2.30553868114486e-06	7.65341205526524
TGGT1_281590	3.41967283969995	1.03523289566057	10.9188745258897	1.73367949141556e-07	2.01747288587021e-06	7.63923435514834
TGGT1_310170	1.26578116913934	7.55907855554086	11.2412766427371	1.26767758471829e-07	1.6224497003715e-06	7.63647791784113
TGGT1_319390	5.89371317579161	-0.00207272198855035	10.9932589257408	1.61177473666349e-07	1.93095897959619e-06	7.6238927185287
TGGT1_231770	5.46912130375573	0.723282534155638	10.961196282749	1.6631482221793e-07	1.9649674838262e-06	7.61856415706308
TGGT1_215960	2.14031861075325	2.55247076866486	10.6961856307999	2.16198105064676e-07	2.38227484194146e-06	7.61347126839932
TGGT1_321580	-1.86388460682992	3.87701363000498	-10.7936368537078	1.96195905676936e-07	2.20924449720655e-06	7.6074269033339
TGGT1_291005	5.1032444920373	-0.644343389700407	11.0519863586449	1.52205826711077e-07	1.84304633726269e-06	7.6050974710004
TGGT1_263630	-1.13332489015232	6.94600177431331	-11.1913049252054	1.33004383856168e-07	1.67389520869327e-06	7.60478789167941
TGGT1_268190	3.16032826160476	1.93960447692054	10.7156660273868	2.12030497487594e-07	2.34775587218082e-06	7.60103865959688
TGGT1_232780	-0.893140861111983	6.55164920143482	-11.1726596401706	1.35415448121057e-07	1.68876466701141e-06	7.60067369991608
TGGT1_254835	1.07299079328368	5.28494496020554	11.0511738325728	1.52326216161284e-07	1.84304633726269e-06	7.59989128767504
TGGT1_305830	5.81989680982027	-0.285978283296551	10.980571113909	1.6318967541423e-07	1.94184691278369e-06	7.59620648387258
TGGT1_270340	2.14175787424786	3.94246265127271	10.7904581296503	1.96815911355436e-07	2.21281643105466e-06	7.59611559178475
TGGT1_258820	-0.947745230153627	6.59944171353532	-11.1643184574111	1.36509284291071e-07	1.69205317297468e-06	7.59050682321208
TGGT1_212275	2.42246905642317	2.55513214602928	10.6721249363524	2.21467852046014e-07	2.41205225447433e-06	7.59028026239679
TGGT1_228990	1.55481190777551	3.9101306464617	10.7946180055313	1.96004958732277e-07	2.20924449720655e-06	7.58531898408473
TGGT1_237100	1.42824192168012	5.68910183337192	11.0667264107358	1.50039553591418e-07	1.82444102769731e-06	7.57409166972061
TGGT1_361230	4.36989312897735	0.669887073683394	10.9192294121281	1.73307482566862e-07	2.01747288587021e-06	7.55679119312124
TGGT1_220730	1.91330890655956	3.49641933009983	10.6969844413381	2.1602548412115e-07	2.38227484194146e-06	7.54907913440072
TGGT1_225125	1.32053164332243	7.89625630722407	11.1670508942226	1.36149915716192e-07	1.69205317297468e-06	7.54825904186253
TGGT1_221220	1.73283504306218	3.42966898660622	10.6878036077527	2.18018427988105e-07	2.39231031792353e-06	7.54341011020607
TGGT1_233430	1.08680320098598	6.72826071966575	11.1203839541456	1.42430150164721e-07	1.74351681307166e-06	7.53918769925736
TGGT1_293030	2.81274920658035	3.85785535932749	10.6950124251367	2.16451901347719e-07	2.38227484194146e-06	7.53399117493507
TGGT1_242790A	-1.05394727258068	5.18984362064111	-10.9443084624366	1.69091463499117e-07	1.99143366980115e-06	7.51622797006754
TGGT1_244620	5.59236375052236	-0.684706297831722	10.9212545306483	1.72962871488008e-07	2.01747288587021e-06	7.51264155797415
TGGT1_215910	1.00392518025858	8.79730040294746	11.1688969163053	1.35907705309426e-07	1.69201620170576e-06	7.51212313033468
TGGT1_270090	0.903780992113848	7.6125345152089	11.117843308645	1.42780907686241e-07	1.74453226531752e-06	7.50930753363683
TGGT1_234580	1.47605320223182	5.43222083834643	10.963799142341	1.65891257322914e-07	1.9649674838262e-06	7.50574701798568
TGGT1_278240	2.33290915290382	3.62128691027696	10.6479940422605	2.26892244216767e-07	2.44922972043742e-06	7.49550139826216
TGGT1_215955	2.27583318995882	2.50734402558501	10.5758122807109	2.43990363673499e-07	2.56189881857174e-06	7.49483647661601
TGGT1_240510	0.968134325002046	6.21496310502919	11.042250679414	1.5365510655078e-07	1.85605209698033e-06	7.48324784969081
TGGT1_312490	1.2140183021096	7.14116340976107	11.0776936630562	1.48449321424297e-07	1.80811273494794e-06	7.48107177530714
TGGT1_210478	4.00775166326647	1.89379141070934	10.6195613146531	2.33468001942282e-07	2.50909435028558e-06	7.48090296793521
TGGT1_237190	-1.24294430777419	5.26639696917859	-10.9091078695406	1.75040976849243e-07	2.02980359900325e-06	7.47649467593369
TGGT1_222250	2.12624722413391	4.6341987041945	10.7774658402136	1.99372078429046e-07	2.2312575025413e-06	7.47575789115461
TGGT1_243530	1.43816591742853	4.67087570589432	10.8095281224992	1.93127738679428e-07	2.18818219266552e-06	7.47057475943532
TGGT1_227600	0.758801534884874	10.3315022873736	11.1907312284166	1.33077875786917e-07	1.67389520869327e-06	7.46719421899204
TGGT1_240930	3.83391179425023	1.93932422371512	10.5835749346024	2.42086649755472e-07	2.56189881857174e-06	7.45751615348002
TGGT1_312980	2.97231164474068	2.36991413096445	10.5359839909022	2.54014862182676e-07	2.62937763857081e-06	7.45325276095075
TGGT1_239820	-0.919071907750023	9.41133610722427	-11.1391427089609	1.39868918360443e-07	1.72371341547743e-06	7.45272749304903
TGGT1_277850	0.944088553056174	6.35849960351782	11.0211889678474	1.56841567095613e-07	1.88209880514735e-06	7.45219912491072
TGGT1_225460	3.37459675803865	1.26216533342481	10.6493676732736	2.26579653504017e-07	2.44922972043742e-06	7.44532452097773
TGGT1_275760	3.05321581103415	1.27616589338888	10.6239695221815	2.32435188815374e-07	2.50536336262943e-06	7.43848737140366
TGGT1_271625A	1.12206544926279	5.0570817285476	10.8566429812566	1.84331131680971e-07	2.10483110988209e-06	7.43845356564244
TGGT1_219290	0.985594247656528	6.05078270604046	10.9841770083734	1.62615064744093e-07	1.93864746027705e-06	7.435698508901
TGGT1_244850	4.72192303181528	0.749716039653138	10.7571630040065	2.03438465912084e-07	2.26981421203895e-06	7.42956811220872
TGGT1_226068	-0.863515466655614	7.13125214647571	-11.0276370976386	1.55858519376854e-07	1.87337838750995e-06	7.42929097648739
TGGT1_239530	-1.12745377453351	5.60378919508467	-10.9166936122332	1.73740039297127e-07	2.0185885646795e-06	7.4286132692544
TGGT1_237460	1.24914559476853	5.10759308150138	10.8336197001806	1.88574506531476e-07	2.14323871497983e-06	7.41090586573611
TGGT1_258575	5.62527826137752	1.37115857650412	10.6800629020241	2.19714149227242e-07	2.4036991056178e-06	7.39614552726411
TGGT1_294730	1.25121369033467	7.16946451350543	10.986991263452	1.62168119598849e-07	1.93647813403332e-06	7.38630594158494
TGGT1_254606	1.14805296345721	5.82575833186656	10.8966843083882	1.77194321974843e-07	2.04894953321543e-06	7.37072378966721
TGGT1_319550	-0.945855655377452	5.76741159326803	-10.8881131083101	1.78696582053033e-07	2.05980224234001e-06	7.37033715334815
TGGT1_203890	1.86734183994472	3.69391778190052	10.5461419052692	2.51416724342425e-07	2.60987701916824e-06	7.36791948867019
TGGT1_307030	3.62538158796558	1.3109960005969	10.5666648523008	2.46254403549016e-07	2.57858321760178e-06	7.36690323420312
TGGT1_235515	2.2912605230029	4.25272219893639	10.6017780159984	2.37684992779879e-07	2.53576923683993e-06	7.36247353856946
TGGT1_239050	-0.952782983535265	7.05626883028279	-10.9604524539235	1.66436079979258e-07	1.9649674838262e-06	7.36194220371183
TGGT1_293220	1.24270721849509	6.74216710536376	10.94093706503	1.69651738046753e-07	1.99143366980115e-06	7.35410918725348
TGGT1_264990	-0.949480224512271	8.13998530422805	-10.9880839764181	1.61994937719839e-07	1.93647813403332e-06	7.35389258426639
TGGT1_271980	3.64174337405687	1.08500203211727	10.590326636796	2.40443870813434e-07	2.554017162652e-06	7.34471534355371
TGGT1_204380	1.27977714053296	7.13751261395337	10.9430761633072	1.69296021116303e-07	1.99143366980115e-06	7.34161816629253
TGGT1_249150	3.38712782045334	2.47659566717072	10.4175048723154	2.86550160016986e-07	2.87257691276287e-06	7.33560700060593
TGGT1_293720	-1.23055240166595	7.1532124478212	-10.9365164371028	1.70389412529827e-07	1.99232932282876e-06	7.33441730666052
TGGT1_218820	0.822844666705262	8.5067117739203	10.9791616817767	1.63414867455113e-07	1.94184691278369e-06	7.3300734264537
TGGT1_201180A	1.68432815053316	4.17689007874198	10.5785555503376	2.43315767724089e-07	2.56189881857174e-06	7.32384707079115
TGGT1_295990	-1.06686616000958	6.84828559750136	-10.9078319730405	1.75260819782574e-07	2.02980359900325e-06	7.3150780241992
TGGT1_212280	2.04157721467204	3.34805438901428	10.4492121436155	2.7742481235742e-07	2.80030459766302e-06	7.31235845474694
TGGT1_291150	1.67702542776828	4.46293114194959	10.6117344566028	2.35313984950714e-07	2.51582202098139e-06	7.31040647981627
TGGT1_203770	4.12789717811482	0.830215412002373	10.6152340331726	2.34486665201246e-07	2.51265183180456e-06	7.30550763902769
TGGT1_209530	-1.44550943064759	4.06079479345692	-10.5252195272154	2.56799738254963e-07	2.64384837664261e-06	7.28805080480808
TGGT1_224880	-1.18048089190774	6.95745333319023	-10.8837009803868	1.79475235133521e-07	2.06238341516834e-06	7.28616364695205
TGGT1_281440	0.862195741020348	9.01248977667443	10.9612114052736	1.66312357956513e-07	1.9649674838262e-06	7.28590632016297
TGGT1_225860	-0.963598443212237	6.84564229539751	-10.8789851847393	1.80311524301835e-07	2.06862891616611e-06	7.28435464197154
TGGT1_231860	4.22956877673183	1.46876272386899	10.4792861267959	2.69058240401504e-07	2.73094114007526e-06	7.28318885839114
TGGT1_205510	1.02133366055312	7.58991622794014	10.8917013921342	1.7806600566161e-07	2.05577625493688e-06	7.27491735816496
TGGT1_285790	3.13353914818712	1.84972311713073	10.3785068479796	2.98219545836987e-07	2.94910479157876e-06	7.27093615553657
TGGT1_288465	3.20925925136779	1.02453227323989	10.4931513083735	2.6529285208937e-07	2.7039890698314e-06	7.26850797107055
TGGT1_260300	2.26142998425664	4.59454400800595	10.5645173185334	2.46789204058565e-07	2.57858321760178e-06	7.26773101889584
TGGT1_286620	0.874591941648549	7.0049747141042	10.8628427752867	1.83206128074079e-07	2.09525881684721e-06	7.26121597042667
TGGT1_218540	-1.20276333084717	6.45961349013631	-10.8339907086493	1.88505298108963e-07	2.14323871497983e-06	7.25983685174899
TGGT1_213060	1.12942661257675	7.61827193795266	10.8640903144875	1.82980647399175e-07	2.09525881684721e-06	7.24475928667177
TGGT1_279000	5.66434840991842	0.166428860789341	10.549641427961	2.50528276995175e-07	2.60435369598967e-06	7.24328415047516
TGGT1_268950	0.948006206937208	7.45650403777516	10.8474867614059	1.86006242036101e-07	2.12064526801845e-06	7.23239265210024
TGGT1_310240	-1.00198709775749	6.76818977743441	-10.8201985470207	1.91096611512658e-07	2.16853111325233e-06	7.22608695193673
TGGT1_255910	0.953180700543208	6.4632245266399	10.805667310608	1.93868370117078e-07	2.18978369214159e-06	7.2217717158502
TGGT1_270380	-0.938960681181101	10.0536457220953	-10.9402400969681	1.69767812847033e-07	1.99143366980115e-06	7.21858146149169
TGGT1_214200	1.0604490026574	6.64919154951278	10.8057967903629	1.93843482073587e-07	2.18978369214159e-06	7.21481764997036
TGGT1_249290	2.93276676346974	2.35218397394399	10.2852592081458	3.28249374821318e-07	3.17728004131681e-06	7.20275898636621
TGGT1_207020	1.1721730485803	4.82255684821706	10.5767004315977	2.4377173866027e-07	2.56189881857174e-06	7.18815551316253
TGGT1_272730	1.60176285665846	4.37977548815193	10.4824275670202	2.68200098777435e-07	2.72601713750417e-06	7.1854469639777
TGGT1_259670	1.05908965857489	5.2810804434021	10.6539589190766	2.25538208178394e-07	2.44544988926959e-06	7.18543275129379
TGGT1_236900	2.624858612837	1.65019401286156	10.2893376750709	3.26869949465368e-07	3.16812412558741e-06	7.1777157982511
TGGT1_220100	0.913727875109518	7.23892845056924	10.7847945385482	1.97925825441703e-07	2.22187700818428e-06	7.17233411945667
TGGT1_254160	4.48768299970564	1.13068772045329	10.4285401756189	2.83338044583114e-07	2.84819041239807e-06	7.16530728179467
TGGT1_203370	0.955706017929844	6.54420033090835	10.748899428119	2.05119062917169e-07	2.285076389937e-06	7.15809342864422
TGGT1_309300	4.07308888094764	1.62257693105791	10.3165970716533	3.17809015963197e-07	3.10086553893063e-06	7.15736440124528
TGGT1_226720	-1.41094652162926	4.56773580922616	-10.4666232803408	2.72547436026163e-07	2.75869343833684e-06	7.13959172373043
TGGT1_233960	3.85528926121288	2.09259635858782	10.2257379356416	3.49110294889762e-07	3.32633381363022e-06	7.12253062961964
TGGT1_238200	3.16461138015901	1.14947279599991	10.2998698884038	3.23336520035948e-07	3.15059105123028e-06	7.11257105086903
TGGT1_292935	3.14015724225613	3.83404152579818	10.2730426869134	3.32418910163017e-07	3.20068168046288e-06	7.11041054493004
TGGT1_296340	2.98570699713238	1.8327679166288	10.2079034264389	3.55635542931654e-07	3.37092678047279e-06	7.10462588660308
TGGT1_268260	1.22090564158573	6.23780610533573	10.6743887264482	2.20966189845119e-07	2.41205225447433e-06	7.10164152993157
TGGT1_305510	-0.895839458352761	7.05869160912872	-10.7105213688807	2.13122659234433e-07	2.35627896170232e-06	7.09890794333077
TGGT1_204290	3.95787730260535	0.768790186765071	10.3869580130168	2.9564793875046e-07	2.9356728529981e-06	7.09725086359509
TGGT1_210095	4.11978638729977	0.875259365260092	10.3661789159949	3.0201411291644e-07	2.98259342863966e-06	7.08786075703427
TGGT1_294651	2.23685136737433	3.27323618768798	10.2187107965015	3.51665846450236e-07	3.3419687982553e-06	7.08379229241012
TGGT1_288390	1.20550276655566	4.94529204653473	10.4977684470426	2.64051598889063e-07	2.69903145203168e-06	7.08238924999355
TGGT1_255380	2.4887222862098	1.7679911109732	10.1740437517702	3.68388233710154e-07	3.47378220897265e-06	7.0742411505835
TGGT1_272285	3.74378473308415	2.5054517685226	10.1591417668787	3.74156089364767e-07	3.5145664538274e-06	7.07342076769169
TGGT1_261520	0.863356784235187	8.68565131351287	10.7371084896089	2.07542987808019e-07	2.30553868114486e-06	7.06662698479028
TGGT1_284050	0.975728668356177	6.71737556279349	10.6683984038831	2.22296336719015e-07	2.41747266181928e-06	7.06579886976448
TGGT1_297820	5.03846407615136	-0.268272499221697	10.3895743350582	2.94856666811377e-07	2.9356728529981e-06	7.06358932968073
TGGT1_207590	-1.29300744178071	5.15981839609615	-10.4963318863696	2.6443712638953e-07	2.69903145203168e-06	7.06157237896097
TGGT1_288990	1.06870608914888	5.7830942916506	10.5993728192387	2.38261613272923e-07	2.53820525230088e-06	7.0585082224921
TGGT1_273815	0.970187947953671	5.88453991433241	10.6110716648285	2.35471026594317e-07	2.51582202098139e-06	7.05746102185798
TGGT1_280600	1.00975049872245	7.97946365861586	10.6911137835856	2.17297592011701e-07	2.38798616905491e-06	7.049105163909
TGGT1_262920	-0.947271672658743	7.57786384486782	-10.6730447583464	2.21263869072348e-07	2.41205225447433e-06	7.04351282800328
TGGT1_293840	1.02787345480574	7.05307139523648	10.6514574255973	2.26104988019161e-07	2.44796333695411e-06	7.03623907332724
TGGT1_306050	3.36017273421946	1.43397001029062	10.1833912371709	3.64819171683019e-07	3.44457171403036e-06	7.03392117958976
TGGT1_214750	0.900978498560418	7.84119305222468	10.6553482275835	2.25224084738961e-07	2.44544988926959e-06	7.01686589328598
TGGT1_294210	4.42021355190895	1.01143316368497	10.2757359666672	3.31494809170099e-07	3.19912377908295e-06	7.01549635605893
TGGT1_285210	1.07712902490484	6.1651124732116	10.5855725184967	2.41599355096441e-07	2.56189881857174e-06	7.00854421004841
TGGT1_238980	5.54544753506736	0.066224600344077	10.2902292109651	3.26569245036261e-07	3.16812412558741e-06	7.00390297972264
TGGT1_245490	-0.899540448520323	8.95812846751323	-10.6841472284929	2.18817650439728e-07	2.39748034394832e-06	6.9977188931722
TGGT1_210990	6.08020240893519	0.660540046013373	10.2506221288747	3.40220248083459e-07	3.26289970209176e-06	6.9966881002785
TGGT1_298030	0.965095399418691	5.69036486598281	10.5333432123762	2.54695033553842e-07	2.63268925772486e-06	6.99535802752593
TGGT1_294690	-0.987001087143834	7.37766498226164	-10.6214116955794	2.33033869361911e-07	2.50811710942098e-06	6.99422764278193
TGGT1_259240	0.782951907266861	9.95724505077993	10.7240443330384	2.10264750212014e-07	2.33173716927071e-06	6.99335963127367
TGGT1_248760	2.35411394131705	2.12707523164722	10.0736081868652	4.0919974486547e-07	3.76154935280108e-06	6.98637449430257
TGGT1_245746A	2.20143956669071	3.83047213311048	10.1920721453776	3.6153794895516e-07	3.42243436653408e-06	6.98476958738453
TGGT1_216870	0.911520349489151	6.49427926931189	10.5815303193219	2.42586514077787e-07	2.56189881857174e-06	6.98154975318836
TGGT1_291075	2.61369707790085	2.9714025477456	10.074345276335	4.08883081837106e-07	3.76154935280108e-06	6.96512944969681
TGGT1_284530	-1.02077897505957	6.51183374532352	-10.5608857719279	2.47696417454358e-07	2.57858321760178e-06	6.96316399640259
TGGT1_274160	-1.17478893308389	5.75103318724967	-10.489962060631	2.66153906229402e-07	2.70898711242962e-06	6.95941238119378
TGGT1_214240	0.893625102622646	7.63875799037704	10.5782425004315	2.43392647991587e-07	2.56189881857174e-06	6.94127187933321
TGGT1_293690	-1.01542414931724	8.71836300148768	-10.6160663192353	2.3429036967287e-07	2.51265183180456e-06	6.93654595407747
TGGT1_285500	-1.02722425934769	6.61040801701594	-10.5397154449687	2.53057105057019e-07	2.62317918263361e-06	6.93529042882374
TGGT1_226780	1.12661288942402	5.46252674967152	10.4329637369456	2.82061358337273e-07	2.83926226822148e-06	6.92383195768792
TGGT1_215430	0.835408769359771	7.71018883726949	10.5621031655404	2.47391895063098e-07	2.57858321760178e-06	6.92175702025268
TGGT1_202205	3.82753086925337	1.33855778888263	10.0938371936417	4.00604107849391e-07	3.6964833587921e-06	6.91767278178974
TGGT1_294790	-0.88565233417587	8.73138158255901	-10.5979311312012	2.38607965015148e-07	2.53820525230088e-06	6.91640084101708
TGGT1_250700	0.974828781254777	8.00045959670256	10.5641384630862	2.46883680231524e-07	2.57858321760178e-06	6.91256771109054
TGGT1_270950	3.08087745546703	2.31058629235515	9.99154658685407	4.46160974971332e-07	3.99087442483536e-06	6.90185008621595
TGGT1_309210	-0.879301452076963	8.23977140443796	-10.5628998122561	2.47192837864499e-07	2.57858321760178e-06	6.90028973912069
TGGT1_207790	3.59023907258966	1.00194741751857	10.1141133759991	3.92183167787528e-07	3.63254067197878e-06	6.89581134241864
TGGT1_248420	0.90108928813707	7.27388678021941	10.5249882678133	2.56859927123187e-07	2.64384837664261e-06	6.89419223384983
TGGT1_216120	1.02279608949536	7.54810856306853	10.5303854865142	2.55459169474238e-07	2.63685820694595e-06	6.89223408566662
TGGT1_311710	3.02205135568415	2.1774008628169	9.97805397538212	4.52574850899352e-07	4.02852254612967e-06	6.88617469438742
TGGT1_320260	1.03028357508852	6.17295520691511	10.4730258842648	2.70777172304765e-07	2.74457638724442e-06	6.886035502467
TGGT1_214295	2.28576993597759	2.9131372864648	9.99480533100144	4.44626604967129e-07	3.98690948355801e-06	6.87860286015515
TGGT1_206610	1.02339489902625	7.52889070263871	10.5139637682415	2.59746929967914e-07	2.66980388777147e-06	6.87507308957662
TGGT1_305280	3.51650604633379	0.828052382507851	10.1194187349134	3.90011381934535e-07	3.63083207538546e-06	6.87102380681778
TGGT1_232640	-1.45325890292977	4.91118969499962	-10.2635230413342	3.35707526620407e-07	3.22809290071307e-06	6.86284746503698
TGGT1_291860	1.30167863769126	6.25296924403778	10.4508342823779	2.76966455793042e-07	2.7995447564807e-06	6.86237147205626
TGGT1_263850	-0.943989080850332	7.51918715516446	-10.5006898256983	2.63269459419976e-07	2.69841964858511e-06	6.86038660896307
TGGT1_213770	0.901036414652834	7.48483250554119	10.4971026350984	2.64230206448745e-07	2.69903145203168e-06	6.85831263272031
TGGT1_288500	0.816559939764419	7.74497326859285	10.5041737843351	2.6233996195624e-07	2.69266916007893e-06	6.85819771910699
TGGT1_247305	5.43774433497637	-0.759097092874463	10.1639135569021	3.72298642849181e-07	3.50161966787878e-06	6.84284782037679
TGGT1_261018	2.9267106364443	1.58431097336826	9.95717308095144	4.62697278363023e-07	4.10861690191613e-06	6.8371526000672
TGGT1_295662	3.12985487262366	1.57419063071938	9.96162098695055	4.60520818725699e-07	4.09426538107958e-06	6.83656492295628
TGGT1_219370	2.54494846047838	2.71712368469255	9.93990387502632	4.71253008820307e-07	4.16434944190907e-06	6.83646875615214
TGGT1_316650	-1.27298964988919	5.6553883951852	-10.3587829302395	3.04315547108701e-07	3.00126588160646e-06	6.8349376720657
TGGT1_263220	1.01548194014218	5.6879248789756	10.3828129032214	2.96906258047359e-07	2.94009611627385e-06	6.83448006336355
TGGT1_224010	3.89881845401936	1.05187623589663	10.0520635719834	4.18573212780407e-07	3.80664493607216e-06	6.82920992180785
TGGT1_312075	1.89455908843161	4.05791643530743	10.0826041550202	4.05352944103222e-07	3.73558551766248e-06	6.82035705342318
TGGT1_214170	0.990301449652797	6.80001823117491	10.438077996165	2.8059304747695e-07	2.82837791856766e-06	6.8152043502766
TGGT1_211420	-0.712782411608727	10.8630186035677	-10.5791206347869	2.43177057855187e-07	2.56189881857174e-06	6.80419248050689
TGGT1_210420	-0.90865609640215	6.16262147637243	-10.3832416779122	2.96775829049306e-07	2.94009611627385e-06	6.79213882571238
TGGT1_210950	3.43913460685194	1.71047487283918	9.90949339646566	4.86736103303529e-07	4.27532144584398e-06	6.78762220679146
TGGT1_286770	-1.8783132235163	4.57422038664108	-10.1181370272336	3.90534869163309e-07	3.63107992855656e-06	6.78613153911588
TGGT1_269680	3.53554918631014	2.07906200937969	9.87694966053892	5.03913792745308e-07	4.35810887264226e-06	6.77435685041931
TGGT1_240200	2.68359738400981	2.00804775807163	9.87062749315406	5.07325914441906e-07	4.37714583787166e-06	6.7734737180321
TGGT1_289150	1.02013736839458	6.91782837260463	10.3869308681086	2.95656160345731e-07	2.9356728529981e-06	6.75550502045678
TGGT1_411590	-1.59862881272104	6.48590130546908	-10.3551504803575	3.05452778955569e-07	3.00842170971334e-06	6.75529716552008
TGGT1_275370	-1.43991212432268	4.16064162271817	-10.0441931341777	4.22054844931453e-07	3.82202826116364e-06	6.75434069938544
TGGT1_311815	2.78151900214613	1.92829497109955	9.85377845970773	5.16541484056459e-07	4.42542223386237e-06	6.75322582154159
TGGT1_235420	1.0563500032369	8.19114438839643	10.4245430229879	2.8449701883411e-07	2.85591238137318e-06	6.75312627896285
TGGT1_293620	2.16455348221785	3.15041205094677	9.89969616045941	4.91840141141457e-07	4.29785223351893e-06	6.75226434847965
TGGT1_214920	1.06315210144015	5.57811021242644	10.2747891708689	3.31819352017635e-07	3.19912377908295e-06	6.73287172381193
TGGT1_214330	1.49854425485085	5.33700456747002	10.2234322688896	3.49946582907999e-07	3.32996045298393e-06	6.73280268860987
TGGT1_266260	-1.42019239651589	4.31134361420661	-10.0472473831666	4.20700054566689e-07	3.81448635083544e-06	6.73049962326767
TGGT1_259630	-1.10339274329938	8.14104426452204	-10.4007500424158	2.91502310685097e-07	2.91821765272149e-06	6.72772529572794
TGGT1_290630	0.960925616131287	6.7129396013197	10.3485681299126	3.07525231653732e-07	3.02475692183778e-06	6.72085812125416
TGGT1_244726	2.05511794939313	3.36648544516692	9.89352375760574	4.95085315607073e-07	4.3175220602106e-06	6.71900878064742
TGGT1_247450	1.00473351931862	8.27911615411791	10.3874962052268	2.95484983002823e-07	2.9356728529981e-06	6.70923504076826
TGGT1_216500	0.919301248456223	6.50593106714724	10.3293309904306	3.13669326278542e-07	3.07690662609877e-06	6.70800413341213
TGGT1_258910	2.52709186680445	2.55001405744216	9.81159614825537	5.40412536912134e-07	4.57098937471514e-06	6.70683673226247
TGGT1_310690	3.70433786244246	0.811006703260711	9.94849220163992	4.66976981163555e-07	4.14158710963988e-06	6.69990159195946
TGGT1_299150	-0.950555186407083	5.62542450126025	-10.2416279398649	3.4340502741435e-07	3.28912705156497e-06	6.69596793348266
TGGT1_315780	-0.900792680407745	6.66834408669202	-10.3189205223689	3.17049315148536e-07	3.10086553893063e-06	6.69137695419347
TGGT1_269290	1.4231587715097	6.94309658117752	10.3225532224254	3.1586544433748e-07	3.09429580056073e-06	6.68613156766677
TGGT1_218280	0.99146716541246	7.79271138299943	10.3436487942665	3.09083970735875e-07	3.03600222867981e-06	6.68154630337284
TGGT1_221560	4.06594481816876	-0.227754077507415	9.9928161787109	4.45562514803842e-07	3.99040546346382e-06	6.6764202096613
TGGT1_293290	2.50594332960657	2.37037219963513	9.77816233009574	5.60175964174171e-07	4.70007571318581e-06	6.67629450763125
TGGT1_309030	4.4873170156372	2.78102966450111	9.77515683780834	5.61990295474492e-07	4.70989114601788e-06	6.67562800000136
TGGT1_215150	1.38646090857121	9.03716221822114	10.3883589470579	2.9522396076377e-07	2.9356728529981e-06	6.67558585071322
TGGT1_216710	2.60358643748296	3.26524096595838	9.81586192048614	5.37945420728339e-07	4.56067881053678e-06	6.66071628296702
TGGT1_218600	0.863688462891733	6.40793302149871	10.2820631034254	3.29334747282068e-07	3.18356922372666e-06	6.66034325557242
TGGT1_254020	4.39526823021375	0.344973039114241	9.93129075882583	4.75583732590083e-07	4.192479997308e-06	6.65940148459259
TGGT1_316280	-1.04200469379498	7.59089558370851	-10.3167401240221	3.17762185410279e-07	3.10086553893063e-06	6.65767495747833
TGGT1_249230	2.99152566689276	3.54418282078681	9.82196549742981	5.34436460233846e-07	4.54675395970774e-06	6.65100831267607
TGGT1_310200	1.48303395110347	6.14544101634877	10.2360310082316	3.45403055063066e-07	3.3039339350797e-06	6.6423457027737
TGGT1_295320	1.1014380381616	5.23891687792675	10.1441679507116	3.8004980142106e-07	3.55621504325878e-06	6.6418448292071
TGGT1_248350	1.86099552397845	3.3226484568685	9.82226337947928	5.34265838686735e-07	4.54675395970774e-06	6.64149357078126
TGGT1_244880	0.879237202678865	7.8502626066753	10.295570379053	3.24773959671446e-07	3.16038361821429e-06	6.6270917285402
TGGT1_269860	3.23424665527933	2.65925940251285	9.72129642886085	5.95599405411882e-07	4.95180939106943e-06	6.61342231847475
TGGT1_235950	5.48561405311346	1.30088379849367	9.83456064513661	5.27273086876462e-07	4.50679733203881e-06	6.61159808679229
TGGT1_315320	-1.17157540407296	8.05249967908889	-10.2899921768381	3.26649164738241e-07	3.16812412558741e-06	6.60989438362369
TGGT1_250770	0.754583655789478	10.5185861355584	10.388082502979	2.95307571774472e-07	2.9356728529981e-06	6.60976091460143
TGGT1_231998	5.03607866681838	-0.432136036587043	9.9024405878928	4.90404602139551e-07	4.29206806279741e-06	6.60943498758921
TGGT1_272640	-0.840077377415085	7.18154689943547	-10.2525034379157	3.39558120241732e-07	3.26082883406909e-06	6.59971666179404
TGGT1_263730	-0.861241892694084	6.2906469332678	-10.2132909452972	3.53650635340501e-07	3.35646602995894e-06	6.59540309879054
TGGT1_225102	3.81156062518667	0.299173740655138	9.87846312858815	5.03100631594809e-07	4.35623153518348e-06	6.59338138262309
TGGT1_259140	1.30528877742692	5.11225102829132	10.0703280857182	4.1061212306511e-07	3.76979069768822e-06	6.59087616862739
TGGT1_231910	0.831126081384124	7.12140632149263	10.2292079140182	3.47855753300954e-07	3.32038587378006e-06	6.57598527724881
TGGT1_215185	3.93516885803167	0.198729798350673	9.85262537984857	5.17178713015541e-07	4.42569324908381e-06	6.56698954525511
TGGT1_259150	3.8416573509099	1.35537310597982	9.72884542640179	5.9076123025534e-07	4.91717889602053e-06	6.56145679223167
TGGT1_288550	-1.38349705515533	4.69159600421376	-9.94226222315337	4.70074633442102e-07	4.15896540096233e-06	6.5447764651399
TGGT1_310235	-1.21048878513562	6.15002509444678	-10.1459751893296	3.7933319568704e-07	3.55621504325878e-06	6.54178252738751
TGGT1_271892	3.13848224518271	1.97429952532155	9.65294041592634	6.41400873226126e-07	5.24673053378144e-06	6.541717617656
TGGT1_207875	2.69796061000662	1.85939935674236	9.64812627660405	6.44766393059218e-07	5.25887589338925e-06	6.53694948043327
TGGT1_294805	3.71729759013814	2.66195766098479	9.64232526663998	6.48847082197833e-07	5.27701987034394e-06	6.53243548788331
TGGT1_313230	0.781763600393763	8.4764237062552	10.2287204774541	3.48031688466821e-07	3.32038587378006e-06	6.52662933018868
TGGT1_308590	-1.04449834169786	5.37798258480195	-10.0476620419663	4.20516483256898e-07	3.81448635083544e-06	6.52229056097048
TGGT1_294850	3.70915572141293	0.813048838982376	9.75525139220749	5.74167423410249e-07	4.7954463203224e-06	6.51503836708761
TGGT1_272360	5.06731179352007	-0.171466560212181	9.78429576989361	5.56492903101239e-07	4.68531121643302e-06	6.51193286207702
TGGT1_271174	2.30867485219428	2.64325868992144	9.62747104642866	6.59423393065928e-07	5.34857509048368e-06	6.50081529521713
TGGT1_259070	0.981977468711554	5.08463798927551	9.99506815024678	4.44503105050205e-07	3.98690948355801e-06	6.49869947164562
TGGT1_239770	-1.18188670013312	5.73506042405844	-10.0665842785544	4.12230584348209e-07	3.77043943731754e-06	6.49829869414234
TGGT1_244270	1.03556375065693	6.01731704910713	10.1049866594484	3.95949776907068e-07	3.662786037515e-06	6.49511312737919
TGGT1_205090	5.3423946072465	0.656556272779961	9.73092189584099	5.89437841935947e-07	4.91175798046511e-06	6.49493729713256
TGGT1_208910	-0.995239623285138	6.50085747141983	-10.1313236147598	3.85185015824734e-07	3.59506014769751e-06	6.49409661540953
TGGT1_213590	-0.937434997731586	6.29533065588573	-10.1168392415275	3.91065693961587e-07	3.63139528776528e-06	6.48991855348729
TGGT1_201660	3.11101554507422	0.75551130512412	9.70626049666273	6.05363467177472e-07	5.0045206087477e-06	6.48225845615456
TGGT1_300250	-0.882754392428208	7.19764400190909	-10.1451160675356	3.79673672842906e-07	3.55621504325878e-06	6.48046554763716
TGGT1_217860	2.91402041962912	2.81605115663969	9.6004342583741	6.79152752605445e-07	5.47215911360594e-06	6.47041715121447
TGGT1_312600	-1.38872264058409	6.78925728384457	-10.1154433625526	3.91637508380988e-07	3.63208998889373e-06	6.46643119555364
TGGT1_318300	0.85715443883593	5.79830905305274	10.0607861836511	4.14750690290619e-07	3.78401753388744e-06	6.46277214150448
TGGT1_269270	2.34137043145534	2.13469548102508	9.57135017320627	7.01087149768538e-07	5.61616617229028e-06	6.45817379562788
TGGT1_315270	0.831420802977881	7.55013230777871	10.1331382040496	3.84455026801793e-07	3.59283546786126e-06	6.4575825246015
TGGT1_268020	4.1432595650947	1.38020563890304	9.61717660063172	6.66861829772372e-07	5.38926545884145e-06	6.44033009655562
TGGT1_255690	1.24684276833689	7.08446005467573	10.1036542149231	3.96502928750252e-07	3.66326599659525e-06	6.43829796074095
TGGT1_238060	4.25330400142052	-0.0471697655402141	9.69960947004792	6.09737334548127e-07	5.03498354901437e-06	6.4171477117283
TGGT1_275780	1.14294685154726	4.826872097122	9.86969054797638	5.07833702706735e-07	4.37714583787166e-06	6.41283477659597
TGGT1_299570	1.98871256288665	3.25834384929799	9.6039746378191	6.76533510940116e-07	5.4570716312918e-06	6.410772455375
TGGT1_273380	1.06678636805449	6.17115882333329	10.0338112387908	4.26695227390327e-07	3.85449780193883e-06	6.40376681364989
TGGT1_225530	0.872076190390301	6.5592552111647	10.0515636293457	4.18793449452931e-07	3.80664493607216e-06	6.39788828933499
TGGT1_289280	3.79201997663461	0.29031646449989	9.67292265906208	6.27632134443094e-07	5.14785144613931e-06	6.3968809063126
TGGT1_313940	3.35547931249292	4.30531056753629	9.66109880240827	6.3574049288079e-07	5.20851067485741e-06	6.3918809551723
TGGT1_294812	1.09272253525722	4.62764334702248	9.81677389881829	5.37419550692865e-07	4.56067881053678e-06	6.39031887411104
TGGT1_313900	-0.856622176851034	6.14868378111752	-10.0136944557502	4.35843859676553e-07	3.92259473708898e-06	6.3837399215617
TGGT1_245460	0.679629153380666	10.7384383490121	10.1903720535979	3.62178041426661e-07	3.42405837871415e-06	6.38365177183314
TGGT1_242750	3.86111872628006	1.0041892756158	9.59052958664286	6.865385355077e-07	5.52557667124479e-06	6.3743148286529
TGGT1_211040	-0.884638675080959	7.40277732989464	-10.0531317339707	4.18103079555292e-07	3.80664493607216e-06	6.37183898524763
TGGT1_251780	0.735371631098767	9.15029157790896	10.1204811691466	3.89578025076551e-07	3.63083207538546e-06	6.37130299487285
TGGT1_313322	3.41378021236219	0.956877324259104	9.57063434463834	7.01636523713879e-07	5.61616617229028e-06	6.36717295922911
TGGT1_291890	-1.18874294538448	10.5760885992129	-10.1696627636735	3.70073907625823e-07	3.4851805630535e-06	6.36715797754371
TGGT1_235000	3.08819178295347	1.00543960939067	9.54877864605669	7.18634911195999e-07	5.72713623884445e-06	6.36155656630468
TGGT1_243710	0.800450488122507	8.20800622067824	10.0614803479228	4.14448104065413e-07	3.78401753388744e-06	6.35315049704595
TGGT1_313980	1.41777051196831	4.15587121641798	9.68860870821013	6.17046483899972e-07	5.07241361568166e-06	6.34710127171547
TGGT1_289300	0.891146420129988	7.37752109195427	10.0277220266514	4.29442443820683e-07	3.86974769351609e-06	6.34458947607545
TGGT1_245748	2.44610156521399	2.42595226843275	9.46960792758851	7.84017174409551e-07	6.14099561797107e-06	6.3402798833867
TGGT1_273510	3.96879404006834	0.934661763459882	9.56055775633813	7.09419291188524e-07	5.66605046995162e-06	6.3327351131319
TGGT1_280570	3.46287093850922	1.34598733725276	9.49445452170678	7.62834638304377e-07	6.01656975511373e-06	6.33243468028066
TGGT1_273460	0.855066501772871	8.83829190626594	10.0669014091044	4.12093221810246e-07	3.77043943731754e-06	6.32802143001913
TGGT1_270720	1.21392902031493	6.68721316086078	9.98929950759848	4.47222325030533e-07	3.99547769110408e-06	6.32602622409888
TGGT1_264182	2.80505951426535	1.68887875332195	9.45517170265222	7.96614366053996e-07	6.21308194997076e-06	6.32586207713955
TGGT1_205080	5.53730544077256	0.348338459311369	9.56357411042664	7.07079884108808e-07	5.65354463136451e-06	6.32530069283493
TGGT1_274080	2.33035480852971	2.74656803245248	9.46555058780828	7.87535863135837e-07	6.14883770063749e-06	6.31485809196219
TGGT1_225200	-1.02481887922906	8.54656435215824	-10.0407789830151	4.23574840434372e-07	3.83104571026534e-06	6.31317748389855
TGGT1_200385	-0.837409292513967	8.4038860189695	-10.0323959206101	4.27332072264213e-07	3.85548491865045e-06	6.31057918944626
TGGT1_200360	-1.08131860335151	9.33137204725844	-10.0679308482455	4.1164766802019e-07	3.77043943731754e-06	6.30691427608801
TGGT1_314080	-1.032409686282	7.10503074478653	-9.98411673657975	4.49680650104919e-07	4.01253503170543e-06	6.3035647877349
TGGT1_289210	-0.805919683501991	6.16795217736188	-9.9345801867839	4.73924755011355e-07	4.18290109857848e-06	6.29202929207261
TGGT1_239790	0.829977844442113	7.52841992553337	9.98120387896906	4.51068676571795e-07	4.02001205900815e-06	6.28818068993112
TGGT1_281470	2.03798284144346	2.31026770237405	9.41955084861564	8.28638151933472e-07	6.36514461570938e-06	6.28625127900913
TGGT1_260480	2.23709671071432	1.96573657464673	9.38665852192207	8.59440457224023e-07	6.54249048061787e-06	6.25916473247778
TGGT1_293560	2.81447351810192	2.44682346992914	9.39306379011048	8.53347009183581e-07	6.51646807012917e-06	6.25898778906736
TGGT1_294600	5.47308004939883	1.47387397932863	9.46864487947076	7.84850835684864e-07	6.14099561797107e-06	6.25742372619644
TGGT1_309610	1.16764337248789	4.98794124734257	9.75366164023537	5.75152120831519e-07	4.79818687104651e-06	6.2513792962869
TGGT1_305030	1.08145411872984	4.71047833871144	9.70676085586259	6.05035787451505e-07	5.0045206087477e-06	6.2484299783427
TGGT1_286630	-1.0821452773093	6.8631492118355	-9.92539229271697	4.78574215387513e-07	4.21375947717102e-06	6.24654294654718
TGGT1_222260	3.41376514608337	0.381585731413743	9.51930399028909	7.42263967716288e-07	5.87699358187501e-06	6.24519720257554
TGGT1_239560	-1.46776456097434	4.3465942586954	-9.61645050547069	6.67389879618433e-07	5.38926545884145e-06	6.2438317532778
TGGT1_244040	1.00312031486669	6.70855080810538	9.91859697321711	4.82044505590526e-07	4.23920727660116e-06	6.24347076881533
TGGT1_356170	2.61204455759013	1.74128608462458	9.37254870796575	8.73029045362069e-07	6.59435464169951e-06	6.24070066092253
TGGT1_225950	4.27114078505183	1.17035043987911	9.44860312838064	8.02418061657464e-07	6.23705895607282e-06	6.23763905318251
TGGT1_266270	2.33080974547828	2.27194803769653	9.37116439661608	8.74374609716314e-07	6.59435464169951e-06	6.2367937299976
TGGT1_285895	-1.13129709763416	6.67157806409752	-9.90518171644063	4.88975288765704e-07	4.28468994040739e-06	6.23337997556471
TGGT1_287220	-1.35047632798587	5.66910051509175	-9.81254016659148	5.39865515251924e-07	4.57098937471514e-06	6.23002719532847
TGGT1_220250	-0.994601090218939	5.61944209287429	-9.81775379642805	5.36855133084819e-07	4.56067881053678e-06	6.22500603452473
TGGT1_228500	4.92659323296819	0.0402337275908036	9.48141853053732	7.73870429503271e-07	6.08112376216119e-06	6.22385184060483
TGGT1_318500	2.04306500619355	2.55152760305196	9.37237764708314	8.73195197615097e-07	6.59435464169951e-06	6.22076294602979
TGGT1_215980	-1.65143162879554	9.75943260702557	-10.0038466770128	4.40399176572266e-07	3.95871732151306e-06	6.21821225812226
TGGT1_260830	-0.992241005227913	6.59736672804574	-9.88953086084699	4.97196872678009e-07	4.32561279229868e-06	6.21756326027892
TGGT1_264150	2.38752916292311	1.8396196576508	9.34578000952919	8.99447923963085e-07	6.72790729613329e-06	6.21431076060422
TGGT1_268176	-1.06681290193408	7.50879742419009	-9.9070978637919	4.8797881002344e-07	4.28109140894514e-06	6.20367767009965
TGGT1_409830	3.8661234323189	0.730014579955336	9.44680020234488	8.04018986494758e-07	6.23705895607282e-06	6.20297498021608
TGGT1_262700	0.904369857576148	6.89390461585029	9.88835263635402	4.97821801570114e-07	4.32589979295409e-06	6.20185070275996
TGGT1_267775	0.983919101124556	5.40958476736409	9.78038047678659	5.58840973708551e-07	4.69426417915183e-06	6.20159128914678
TGGT1_245600	3.07994211873276	0.725527428221988	9.42000413564636	8.28222050661137e-07	6.36514461570938e-06	6.19419171973906
TGGT1_305810	0.892250250812174	5.90155694099191	9.82857965633935	5.3066175125295e-07	4.52517628723052e-06	6.19125197952431
TGGT1_272620	4.53364435068626	0.656764844059247	9.43372744965793	8.15730304091227e-07	6.30070703101433e-06	6.19071014125506
TGGT1_306480	2.50076717229241	3.01604981290658	9.37151746514174	8.74031211920053e-07	6.59435464169951e-06	6.18947976301975
TGGT1_307780	3.52075237532555	1.61087694228065	9.33866707853487	9.06611547040241e-07	6.75384014859336e-06	6.18833671394734
TGGT1_220460	2.31142102569002	3.28871733076627	9.3985296195869	8.48183992876711e-07	6.48381654805754e-06	6.18575446507015
TGGT1_309280	1.43098276319529	5.57801028370103	9.76666383610279	5.67151546128369e-07	4.74226944977817e-06	6.1801670001991
TGGT1_261430	0.94397854719255	6.91128296587579	9.86817700495818	5.08655140602576e-07	4.37838841875575e-06	6.17846758531038
TGGT1_210310	1.02989086567538	5.54047135361791	9.77348285938696	5.63003569925915e-07	4.71297833793653e-06	6.17591985388419
TGGT1_218720	-0.827773543380099	7.87260608293807	-9.89183415467451	4.95977645357331e-07	4.3201485485952e-06	6.17451032939661
TGGT1_293420	1.76824907714432	3.10441707303031	9.37964396831428	8.66167241355498e-07	6.56633838156222e-06	6.17149127987023
TGGT1_213570	0.75077021959749	8.24555398078238	9.89893001939723	4.92241696696134e-07	4.29785223351893e-06	6.1685171709055
TGGT1_311100	-1.21908856852043	7.46217197520226	-9.86954647669234	5.07911832309136e-07	4.37714583787166e-06	6.1621446059279
TGGT1_221265	3.98280497800118	0.35508558586546	9.42509245921498	8.23566537063027e-07	6.34875976039726e-06	6.16178068720529
TGGT1_227960	-0.818152632476236	7.34891937097343	-9.86043330726311	5.12880272295625e-07	4.3992124764512e-06	6.15611750699845
TGGT1_320730	2.79534406597961	1.36184482117668	9.30735446247281	9.38884737790926e-07	6.9376841898646e-06	6.15229275705684
TGGT1_233030	-0.837595593558395	7.6550884741749	-9.86224855666327	5.11886454474229e-07	4.39584748448609e-06	6.14898418324326
TGGT1_268170	-1.08023548615004	5.39057866534549	-9.71685085631304	5.98468516782658e-07	4.97000900073598e-06	6.14858979444924
TGGT1_237450	2.4729031135546	3.18236303391848	9.35215127224154	8.93082907492827e-07	6.6939998850847e-06	6.14837055844451
TGGT1_266740	3.14016233326054	1.34976216235187	9.30473202346903	9.41643131908233e-07	6.94402422601954e-06	6.14204862079342
TGGT1_271625B	0.94193538432869	6.16446319745239	9.79827247875697	5.4819702332934e-07	4.63147265490268e-06	6.13535276236605
TGGT1_289880	-0.792618423119829	7.28130525425313	-9.83119699000309	5.29175966764705e-07	4.51777799663138e-06	6.12478943955699
TGGT1_247270	2.15874184277907	3.20434248390535	9.34015745100072	9.05105489077572e-07	6.75106194824182e-06	6.12437070858685
TGGT1_318675	2.68988311171149	1.92505066642505	9.26211225710173	9.87715237864123e-07	7.16093547451489e-06	6.12303968007362
TGGT1_211260	-0.890969092896665	8.30555705806396	-9.86272887468928	5.1162383547375e-07	4.39584748448609e-06	6.12285760402257
TGGT1_247970	2.05915018590514	2.31145074409614	9.27051521757794	9.7844334430407e-07	7.1369337013573e-06	6.12085410273494
TGGT1_270040	1.63103349155283	3.59905668941744	9.38811054026766	8.58055036763839e-07	6.5387551706675e-06	6.10713091655732
TGGT1_212170	1.07133629828635	6.43856024999912	9.78484777143442	5.56162712728958e-07	4.68531121643302e-06	6.10476961456222
TGGT1_268820	2.62391493511295	1.23259212907784	9.26266823682652	9.87098856876547e-07	7.16093547451489e-06	6.09826174161118
TGGT1_305790	1.93407204092374	4.03156437774484	9.4349217387276	8.1465281624576e-07	6.29998177896721e-06	6.0982348819952
TGGT1_318220	4.8401173244604	1.48538303049578	9.29912082942293	9.4757453388539e-07	6.97369052732571e-06	6.09801483872285
TGGT1_293020	2.68471476244233	2.68270883209659	9.26073154574146	9.89247738966102e-07	7.16493803405775e-06	6.09670584692181
TGGT1_261570	0.64860632728857	11.436965931521	9.94340943595876	4.69502562447646e-07	4.15893906226352e-06	6.07959724592808
TGGT1_207710	0.949557574341692	5.26199029767871	9.65211835034949	6.41974231026668e-07	5.24673053378144e-06	6.07737605784761
TGGT1_250810	0.693328386775768	9.89718063328046	9.88368432328688	5.00306191771837e-07	4.34019469760728e-06	6.07089008922402
TGGT1_409990	-1.22762240648584	5.06233653364544	-9.58528738065663	6.90482502236592e-07	5.54510563334617e-06	6.06242333701051
TGGT1_316890	3.0600537910645	0.712747460288994	9.28737350859899	9.6012269119974e-07	7.04475564988725e-06	6.05850419322254
TGGT1_203250	2.84334153121148	1.22931314085097	9.2281805326778	1.02612780700524e-06	7.35911875720738e-06	6.05788027286936
TGGT1_225098	2.4872943151928	1.57561383133338	9.20528091743701	1.05295717149623e-06	7.50732781394584e-06	6.05572192550442
TGGT1_312120	1.59895261459793	3.07739221149917	9.27362725633881	9.75033274045243e-07	7.1326758425652e-06	6.04928370215958
TGGT1_203300	1.52346643581239	10.6091132885094	9.88303155894837	5.00654642868492e-07	4.34019469760728e-06	6.04347501153419
TGGT1_242740	4.30334918503786	0.431620589325554	9.27158524973413	9.77269394119419e-07	7.1369337013573e-06	6.01662971977976
TGGT1_277560	1.37761420249995	5.29365574849893	9.58632324609008	6.89701242530006e-07	5.54492484093431e-06	6.01501705668965
TGGT1_263450	1.81382948349598	3.82649353973857	9.3346983655554	9.10635183837978e-07	6.7769062357311e-06	6.01279243896592
TGGT1_215370	0.868718103643906	6.21468453561038	9.6945425926594	6.13092242411272e-07	5.05127182360945e-06	6.01140497359433
TGGT1_317720	0.883616219073353	9.02552907417689	9.79492727154269	5.50170386238442e-07	4.64277734714843e-06	6.01041177143173
TGGT1_215400	1.22287060988833	5.53329057516403	9.62000425322938	6.6480970945249e-07	5.38032043928992e-06	6.00831119173005
TGGT1_318240	2.74481112731631	2.03977888311053	9.15286337185135	1.1172504824196e-06	7.89190807529492e-06	6.00188087084523
TGGT1_214800	1.09875077730049	4.81664477891713	9.50859910612993	7.51051501975682e-07	5.93371283939274e-06	6.00034048445124
TGGT1_276200	2.20801422534822	3.04626103461042	9.20982083537753	1.04757884234334e-06	7.49576272893953e-06	5.99459973361603
TGGT1_205662	4.58047369584201	0.656938423167884	9.23776723485507	1.01511497200114e-06	7.31095649003062e-06	5.99333947971309
TGGT1_234550	-0.813066924473312	9.42509863453541	-9.78204765233987	5.5783983840681e-07	4.69124688041078e-06	5.97670224111736
TGGT1_213000	0.869414803789614	5.76134074954046	9.62594512153639	6.6052032027284e-07	5.35153270571387e-06	5.97325062831622
TGGT1_300040	-0.871077290270442	7.77787752610162	-9.7069071440239	6.0494002100096e-07	5.0045206087477e-06	5.9666496785803
TGGT1_232380	0.968423238986156	6.8038958306922	9.67766680117767	6.24410114885382e-07	5.12717878604761e-06	5.96430902491608
TGGT1_411650	3.98846022665364	0.78367980099899	9.2074827751073	1.05034498785662e-06	7.50334425342733e-06	5.96401477271788
TGGT1_267500	-0.794596881756119	8.05481056214239	-9.71226139159631	6.01446099886857e-07	4.98906708055977e-06	5.96189584913676
TGGT1_231480	0.87385499484871	7.97598138946746	9.6980082355627	6.10795412911163e-07	5.03802807850427e-06	5.94981411201146
TGGT1_230130	4.28846153692937	0.132523468046054	9.20924616405618	1.04825800615438e-06	7.49576272893953e-06	5.94238646913727
TGGT1_261410	-1.10318182715742	4.4994180358997	-9.38011239318676	8.65716274145231e-07	6.56633838156222e-06	5.92602294926288
TGGT1_288580	-1.37395813472982	4.22181791639818	-9.32236154860635	9.23265805184264e-07	6.84997614648386e-06	5.9229205908477
TGGT1_209705	3.26842040590121	1.54771742686779	9.09157423639112	1.19782114295209e-06	8.31308348783845e-06	5.92281982717302
TGGT1_295650	0.876857761904997	6.92845812590121	9.64535910566132	6.46709490250637e-07	5.26884387374767e-06	5.92230654910403
TGGT1_218850	-0.948177603653854	5.3825062592923	-9.52451500503318	7.38026368328903e-07	5.85613105292902e-06	5.92118280657503
TGGT1_214400	-0.932549393818944	5.56402401579113	-9.53718896382954	7.27828107222584e-07	5.78777781020962e-06	5.9072758784993
TGGT1_250720	1.03976662039843	7.96894575994321	9.64086411683068	6.49879294377332e-07	5.27701987034394e-06	5.88326172376455
TGGT1_265450	0.89950766372619	8.32057681399641	9.64109718262266	6.49714529439861e-07	5.27701987034394e-06	5.86877977309271
TGGT1_223095	1.55553858433942	4.0174923256832	9.23729156875102	1.01565839302632e-06	7.31095649003062e-06	5.85750090656083
TGGT1_308940	-1.17200754716803	5.32219914643434	-9.45053155287349	8.00709492492093e-07	6.23171988405987e-06	5.85602206683337
TGGT1_294620	0.85812823635103	8.98538546762646	9.65128021658473	6.42559363400983e-07	5.24673053378144e-06	5.84694068395606
TGGT1_263440	1.05335240334865	6.19257384333899	9.54292769944985	7.23260304215964e-07	5.75771928454277e-06	5.84117792348582
TGGT1_321490	2.19479261857387	3.08394863900647	9.07266691894891	1.22392002715141e-06	8.4700829151728e-06	5.830881235517
TGGT1_214545	2.79168035823417	1.07402181325608	9.02281995172835	1.29570062440307e-06	8.8172749487962e-06	5.82658339458183
TGGT1_236670B	2.7342401850977	3.00570355618274	9.04430306727949	1.26422479339541e-06	8.68322818621587e-06	5.8219871259816
TGGT1_248360	-0.819806658122911	7.79635998090383	-9.5815701796372	6.93293897247127e-07	5.56157168066082e-06	5.82101621582232
TGGT1_277700	1.12414652766452	4.53468624902434	9.3053246584521	9.41019011906905e-07	6.94402422601954e-06	5.82087668036262
TGGT1_258832	-1.05761421283846	5.52867340685838	-9.45174251095021	7.99638592877881e-07	6.23002008182469e-06	5.81854362430471
TGGT1_232300	0.638244319127846	10.7372669213524	9.68927199635378	6.16603120805393e-07	5.07241361568166e-06	5.81576757141051
TGGT1_252390	-1.24247644412032	5.9007537459893	-9.47613660739073	7.78390679561729e-07	6.11007420648455e-06	5.80603798831113
TGGT1_251730	1.05011202253619	6.03573858613411	9.49403686783275	7.63185572385117e-07	6.01656975511373e-06	5.79698326105034
TGGT1_215895	0.943684972018161	5.61237138662117	9.44659968463036	8.04197250175903e-07	6.23705895607282e-06	5.7851327838756
TGGT1_266300	-0.848714814175035	6.88551057912239	-9.52191156698903	7.40140223661756e-07	5.86653444091119e-06	5.78062382464329
TGGT1_238400	-0.880760682379187	7.3292294888029	-9.53258892776218	7.31511953527167e-07	5.81074930040928e-06	5.77879701711838
TGGT1_258200	1.99962324184594	2.13000966311556	8.96103702405135	1.39100726762965e-06	9.31758122074929e-06	5.77808434621274
TGGT1_309885	-1.99842036730816	4.12114818639543	-9.15099300388288	1.1196211956126e-06	7.89190807529492e-06	5.76926731334739
TGGT1_297680	3.17666112152728	1.29839825721114	8.94714054584166	1.41346501207853e-06	9.39054755297263e-06	5.75357943142898
TGGT1_215180	2.07199570781025	2.74397040690557	8.97374333805846	1.37080815810663e-06	9.20759744434123e-06	5.75016499552796
TGGT1_239020	1.02420166023253	7.55824656036434	9.51033637446793	7.49617823361989e-07	5.92879551204482e-06	5.74643788239843
TGGT1_310330	-0.840156252724417	5.65720012841364	-9.40681849884969	8.40418309289098e-07	6.44257331880949e-06	5.73815408164334
TGGT1_214820	0.908486264498816	6.38491808921607	9.4669626804105	7.86309316629375e-07	6.14582725767644e-06	5.73706213736111
TGGT1_265542	3.34221154010159	0.561643731795811	9.00041479000612	1.3294263250211e-06	8.99578479930945e-06	5.73595970328104
TGGT1_263460	2.26808794439631	1.9774783374912	8.91723944016262	1.46311904482837e-06	9.66769799241022e-06	5.73511790910135
TGGT1_225745	-1.05088400119805	5.86687877873519	-9.41911252500335	8.29040731103544e-07	6.36514461570938e-06	5.7349701681674
TGGT1_249760	0.887674077810997	5.61547690858121	9.40522297697987	8.41907159204032e-07	6.44257331880949e-06	5.73437362619594
TGGT1_315740	-1.35198231510691	5.35550162555565	-9.34203080315056	9.03216234894044e-07	6.74918634417758e-06	5.73312812018137
TGGT1_248200	0.956552666032824	5.57335151697069	9.39199628319832	8.54359313695704e-07	6.51738816752422e-06	5.72642661231757
TGGT1_312130	1.09242895508203	5.49225759162597	9.37375943638762	8.71854030302817e-07	6.59435464169951e-06	5.72189099478143
TGGT1_238970	3.04145509641516	1.10007693768873	8.9282398076498	1.44463725762074e-06	9.57154041585891e-06	5.72144250566521
TGGT1_280450	1.086701343509	4.69260959310597	9.23663322540668	1.01641102817065e-06	7.31095649003062e-06	5.70581937940766
TGGT1_274180	1.03639441319578	5.55509044710558	9.36750083634041	8.77946397080884e-07	6.61446625759495e-06	5.70358911737381
TGGT1_249325	1.06776683531681	4.74179991164914	9.24044592145979	1.01206055707748e-06	7.30122265658661e-06	5.69986681612782
TGGT1_295090	1.00007144048602	6.68499283881424	9.44419182822267	8.06341198283726e-07	6.24231088671342e-06	5.69722480275894
TGGT1_207100	1.14845025417486	6.53986073315632	9.43290752182965	8.16470930264173e-07	6.30070703101433e-06	5.69235384563202
TGGT1_254450	0.998727245948831	5.61961185719464	9.35978993368719	8.85515499632926e-07	6.65092216990485e-06	5.68380177497852
TGGT1_244400	-1.33344241017897	3.67576111233971	-9.03720227276519	1.27453660559872e-06	8.71310899318562e-06	5.68346858469757
TGGT1_211630	-1.15413629677286	7.98419132363863	-9.47051081060305	7.83236459783886e-07	6.14099561797107e-06	5.68179888046404
TGGT1_224680	4.30189237053556	1.03562248607333	8.91870214272321	1.46064697618114e-06	9.66009782980252e-06	5.67531570411049
TGGT1_224080	3.88559072231673	1.81982751904432	8.85525774478996	1.57211565082456e-06	1.02397693192744e-05	5.66497763228652
TGGT1_210255	0.880901678908773	5.65148086556481	9.35036567805946	8.94861852685772e-07	6.70046149531519e-06	5.66467631907732
TGGT1_219460	1.04879946614756	6.76781638761975	9.41896537663852	8.29175926950647e-07	6.36514461570938e-06	5.66452864519457
TGGT1_248340	0.726176212071522	8.91899381690638	9.49028335592448	7.66347267297403e-07	6.03498472996705e-06	5.66229682479353
TGGT1_312420	-0.766285872413735	8.75090157602557	-9.48171049459734	7.73621392434734e-07	6.08112376216119e-06	5.66213547328675
TGGT1_276120	1.18750582016519	4.7591847493826	9.20175270555129	1.05715745041165e-06	7.52992850644085e-06	5.65466327369082
TGGT1_232390	1.19522782091713	4.49433416715064	9.1508078766392	1.11985614040515e-06	7.89190807529492e-06	5.64779407575687
TGGT1_264210	1.21243236505462	6.12229497761411	9.36510274086604	8.80292912729302e-07	6.62531473349716e-06	5.64201730124145
TGGT1_268310	2.24454617239033	2.51952244622199	8.85725300683901	1.56847421370886e-06	1.02342942444503e-05	5.63661413275557
TGGT1_411240	2.96871953421736	0.992229277286771	8.8561450417073	1.57049517686673e-06	1.0238339654364e-05	5.63613772788881
TGGT1_233180	3.27014148271106	0.720218153204655	8.88635257397431	1.51638326146519e-06	9.9566297167903e-06	5.63407195886062
TGGT1_232710	0.657180924132633	11.3670205483836	9.55008075500394	7.17609879238723e-07	5.72521069593514e-06	5.62935862034812
TGGT1_222935	1.55516143029571	3.52180494160668	8.96723174472459	1.38111992516757e-06	9.25983891112351e-06	5.62476930329482
TGGT1_240380	-0.79971182798759	8.86644197542947	-9.4459115559278	8.0480933163337e-07	6.23705895607282e-06	5.61416589805147
TGGT1_242790B	-0.744551158228859	6.47737382488562	-9.36150772820561	8.83823241266865e-07	6.64504140656198e-06	5.60871032797632
TGGT1_226990	-0.955711387766664	5.63270682714414	-9.2904333505721	9.56837142454576e-07	7.0277043588523e-06	5.6085336246858
TGGT1_265455	0.858561921367072	7.44444783000081	9.38231427997311	8.63599828837716e-07	6.56633838156222e-06	5.59935000174126
TGGT1_313290	-0.913339503511559	6.17889188529761	-9.33133722031795	9.14057860062134e-07	6.79545762088919e-06	5.59588763802082
TGGT1_244030	3.88460485591102	0.508449553233171	8.86808152380838	1.54886905040945e-06	1.01335138947111e-05	5.59453780869076
TGGT1_311335	-0.798005892321588	8.42006683126511	-9.40612832742041	8.41061990135946e-07	6.44257331880949e-06	5.58886465772864
TGGT1_231625	-0.982181521391779	4.78796382194905	-9.13318526904228	1.14246539300242e-06	8.02030460332534e-06	5.57088181467061
TGGT1_229680	-1.15294125077462	4.95363669750555	-9.15266949257094	1.1174959758671e-06	7.89190807529492e-06	5.57001334786896
TGGT1_231750	0.867698630547804	6.04291040519161	9.30327547360855	9.43178955747684e-07	6.94833851673798e-06	5.56664890642068
TGGT1_233350	-0.883553620687177	6.95338897975058	-9.33995014014226	9.05314820645455e-07	6.75106194824182e-06	5.56402729812448
TGGT1_260360	0.994130307935559	5.81715736978596	9.27829876538095	9.69938347111513e-07	7.1025144696302e-06	5.56268078833378
TGGT1_261650	0.817136081089432	5.62637773007519	9.263159912941	9.86554109893158e-07	7.16093547451489e-06	5.56239414084223
TGGT1_233470	0.757470967781978	7.8291676142258	9.3546769793258	8.9057309489017e-07	6.68204124995622e-06	5.55455924161427
TGGT1_203160	-0.95125502116998	5.66069562511097	-9.24628595962888	1.00543555260735e-06	7.26777746632494e-06	5.5520427836873
TGGT1_266860	2.80979209999297	2.07297600232142	8.75412876714008	1.76911713537093e-06	1.12423548046007e-05	5.54854457703568
TGGT1_462971	3.3235306786392	0.976612892621151	8.78411181837353	1.70808164817149e-06	1.0997938929372e-05	5.54847678511017
TGGT1_218510	2.89197766931824	1.99615217895764	8.74201827613114	1.79443039340189e-06	1.13636891810927e-05	5.53685040995242
TGGT1_243600	-0.900379242682685	5.87666648308619	-9.25646060330174	9.94004414239067e-07	7.19226164283079e-06	5.53553991642591
TGGT1_270080	2.17761155016779	2.36398601302378	8.75524373113573	1.76680599430248e-06	1.12423548046007e-05	5.52762977436039
TGGT1_205060	-1.26484013097157	4.63009836537183	-9.05264809363054	1.25222054281921e-06	8.64138595554558e-06	5.51962741540688
TGGT1_207250	2.91336285075592	1.30337700724079	8.7318597161167	1.81596369762205e-06	1.14603304855112e-05	5.5180347447879
TGGT1_227310	1.3442679349961	3.97744798374799	8.95161921755247	1.4061849040831e-06	9.38534575965549e-06	5.51747527306887
TGGT1_295125	-0.798487571946968	7.79532226032778	-9.31976188642884	9.25951328512892e-07	6.86293337603673e-06	5.51311330293036
TGGT1_269582	1.92564394025028	2.71961919805765	8.77263639855196	1.73117041350627e-06	1.10977134928981e-05	5.5128073616326
TGGT1_260290	2.17281412088596	2.69466432601427	8.76611711757823	1.74443641713726e-06	1.11622385157326e-05	5.51245845883716
TGGT1_270520	0.773986769402124	8.06669134799204	9.32634793613736	9.191640071351e-07	6.82647415055214e-06	5.51136146997277
TGGT1_276940	-0.980047290974166	6.34017079288288	-9.26672550344306	9.8261331004886e-07	7.1523287548178e-06	5.50854163705441
TGGT1_242240	-1.23847282431997	4.98433150463697	-9.10148305056575	1.18438279599843e-06	8.23546096399288e-06	5.5075341078742
TGGT1_238073	0.950110221366123	5.085582958793	9.13825775886956	1.13590769097701e-06	7.98961829226181e-06	5.50521941852463
TGGT1_273790	-0.821012569650215	7.1964665218192	-9.29128141984386	9.55928656630545e-07	7.0277043588523e-06	5.4980863425048
TGGT1_294200	-1.47431320003847	9.75194879455892	-9.38097823455219	8.64883366124864e-07	6.56633838156222e-06	5.49760881560845
TGGT1_272040	1.35631097990795	5.15458082296851	9.12439257979511	1.15392913756564e-06	8.07750396295947e-06	5.49312772790701
TGGT1_296015	-1.71549873050217	3.45790858764078	-8.83651779297118	1.60676333886129e-06	1.04097752485801e-05	5.49204821150321
TGGT1_312190	-1.05150650199294	6.72193398485443	-9.27028596045931	9.78695063254779e-07	7.1369337013573e-06	5.4918621192589
TGGT1_304930	1.94290895163868	2.31631396037536	8.72070871712744	1.83992052506466e-06	1.15516659769524e-05	5.48715135506093
TGGT1_210830	1.12037900619202	5.18317281464527	9.13189112607736	1.1441449636571e-06	8.02438713474675e-06	5.4857642439247
TGGT1_253150	3.45202134151455	0.333682858164189	8.77688330061979	1.7225867392659e-06	1.10605422775619e-05	5.48459631013708
TGGT1_289830	0.71069941725864	8.3213981420834	9.30973390094703	9.36389457523869e-07	6.92624914532838e-06	5.48033841241794
TGGT1_234640	0.760788968673385	7.62639183804969	9.28566240661015	9.61965296726717e-07	7.05119597640807e-06	5.47933816432193
TGGT1_263327	-2.05517753805129	3.13843316993969	-8.77625266366076	1.72385846389478e-06	1.10605422775619e-05	5.47797145190166
TGGT1_314470	1.02732141107792	5.01129331694017	9.09842814122467	1.18850851132176e-06	8.25629296648232e-06	5.47400248689084
TGGT1_312160	-0.776125083231293	7.03710627666717	-9.26518552636426	9.84313260080874e-07	7.15757343748361e-06	5.47194532708003
TGGT1_240390	1.961491193469	2.44600711702071	8.71597573315751	1.8501912524089e-06	1.15962244190431e-05	5.47168025353537
TGGT1_204330	0.789725008981779	6.16004991099304	9.22995746539958	1.02407687921408e-06	7.35549414181534e-06	5.46860073912501
TGGT1_300990	2.85137692110678	0.593002367956983	8.73412466842336	1.8111387133501e-06	1.14496554646735e-05	5.46627305590748
TGGT1_226870B	0.964223993857193	5.96281443481626	9.20535278272704	1.05287180365138e-06	7.50732781394584e-06	5.45975421967322
TGGT1_216480	0.896744822439389	5.72743758651798	9.18368253985006	1.07895385430814e-06	7.67022837284424e-06	5.45675646924839
TGGT1_226280	0.943866585027863	5.17134794763767	9.11066335252491	1.17207695797445e-06	8.16543222962564e-06	5.45558061758423
TGGT1_201260	-0.778257584148559	8.95228067797314	-9.31231716518782	9.33688497413456e-07	6.91326802340176e-06	5.45138263701869
TGGT1_254630	-0.941531032142204	6.36090974078851	-9.21931362362965	1.03642814512494e-06	7.42570282801283e-06	5.44946816607595
TGGT1_250830	-0.841900510698038	5.74570310707163	-9.16933877004173	1.09659926837532e-06	7.78053150804547e-06	5.44447858067535
TGGT1_267790	1.07658103422418	4.89429537801501	9.05120801578713	1.25428330807275e-06	8.64745510886385e-06	5.44203095124114
TGGT1_265220	0.869600648654281	5.59699515930528	9.1565588491257	1.11258226590521e-06	7.87863488297989e-06	5.44029317296321
TGGT1_310870	1.07938463715441	4.72367803737106	9.0191291600249	1.30119240255148e-06	8.83561013838411e-06	5.43864061869331
TGGT1_257480	-0.937515560633139	5.51673593359411	-9.13343884766467	1.14213660296075e-06	8.02030460332534e-06	5.437015873889
TGGT1_230710	1.04343875599194	5.7787209553992	9.16832273877005	1.09786087788108e-06	7.78192754176034e-06	5.43674223193936
TGGT1_247730	-0.899278636324258	6.19504873902305	-9.19094430959632	1.07013713799683e-06	7.6149583295821e-06	5.42662736255462
TGGT1_305910	1.05672881082925	4.88629219181179	9.03200076576386	1.28214759218078e-06	8.74877180546885e-06	5.41968647218058
TGGT1_254200	1.04310948046949	5.50264465217822	9.12332025240622	1.15533565281043e-06	8.07961047917574e-06	5.41966513704432
TGGT1_295690	1.03535399420476	4.94581991829699	9.04191412831046	1.26768398245385e-06	8.69881177819036e-06	5.41908164237424
TGGT1_264610	0.704870850873158	8.23094805842163	9.24500468867648	1.00688503877247e-06	7.27106310607629e-06	5.40733963482879
TGGT1_258850	0.937665450796914	5.49302593410332	9.11089256840199	1.17177146652357e-06	8.16543222962564e-06	5.40260848046215
TGGT1_260840	1.06897535884168	5.5365001309807	9.10612599309198	1.17814185096547e-06	8.19986728271964e-06	5.39535897195701
TGGT1_231220	-0.869166779466655	5.6535480607196	-9.11544078971495	1.16572740447219e-06	8.1367104793532e-06	5.39252462497893
TGGT1_230230	0.837919332673952	6.04926003018782	9.15123275952095	1.11931700070239e-06	7.89190807529492e-06	5.38357409605574
TGGT1_254780	3.79065335323569	0.381319942799374	8.66390302142488	1.96734431993033e-06	1.21084121991698e-05	5.37083282075659
TGGT1_286932	0.948776021356903	5.98895141273159	9.12770575095466	1.14959503874796e-06	8.05488067418037e-06	5.36321640218176
TGGT1_216940	2.16419694885366	2.13621884780849	8.60110719652164	2.11931546393613e-06	1.27851874821416e-05	5.35981184067457
TGGT1_309940	0.931690905387307	6.27236583399037	9.14332196333712	1.12940103406723e-06	7.95150554620746e-06	5.35931189306228
TGGT1_258828	-1.73474173044954	2.89923274960417	-8.65960238563738	1.97736980179974e-06	1.21535900013057e-05	5.35828890417703
TGGT1_304910	0.952763403519511	5.27297506192337	9.04433665639556	1.26417622863807e-06	8.68322818621587e-06	5.35766720458513
TGGT1_274020	3.29127184705672	0.419181124934916	8.65336686756513	1.99200333219333e-06	1.22229725874633e-05	5.35733267364476
TGGT1_319992	2.74246402768709	1.62162076186957	8.57683885865966	2.18138170223415e-06	1.30455214932976e-05	5.34892422947869
TGGT1_294800A	0.679926273524616	10.1353056601494	9.26953354333593	9.79521688897287e-07	7.1369337013573e-06	5.34488106074206
TGGT1_298050	0.96349635921727	5.19436488862368	9.02152810952649	1.29762000567476e-06	8.82140186183366e-06	5.34422994180053
TGGT1_294800B	0.743283572621526	9.30069985284644	9.22949008052286	1.02461590535961e-06	7.35549414181534e-06	5.33299768105459
TGGT1_235905	0.999277538771485	5.56254720437176	9.04699269849233	1.26034233394136e-06	8.67439925364617e-06	5.31718076137774
TGGT1_308990	1.03209562188232	4.95193904784567	8.9509623145949	1.40725017846472e-06	9.38534575965549e-06	5.30757957485803
TGGT1_269760	1.42530758402124	4.50589427773315	8.86088513057421	1.56186866755482e-06	1.02094241703852e-05	5.30444941780946
TGGT1_265538	3.73689986500446	0.138056027921622	8.61039305995633	2.09607058232826e-06	1.26700445125351e-05	5.30422553523754
TGGT1_233360	3.13048687272588	0.494773601570919	8.59030670304192	2.1467004140328e-06	1.28907860523843e-05	5.29371344086057
TGGT1_320525	-1.3212663152182	3.7897184589095	-8.72135387751825	1.83852525357091e-06	1.15516659769524e-05	5.28157088499687
TGGT1_266670	2.2049466088695	2.57917768223051	8.55820207809434	2.23036891062254e-06	1.32408903321117e-05	5.27582046578157
TGGT1_206320	0.843106344590704	5.73729155981118	9.03335313538164	1.28016408214248e-06	8.74340103953015e-06	5.27263026124634
TGGT1_289050	-0.876751815680229	9.35575779105517	-9.1798809966971	1.08360051777243e-06	7.69577510581238e-06	5.27260282749284
TGGT1_304630	-0.788587956319857	7.75950335296079	-9.11552247188011	1.16561916498628e-06	8.1367104793532e-06	5.26951537518717
TGGT1_266930	0.915640456140828	5.76430941312	9.02274869439319	1.29580641694131e-06	8.8172749487962e-06	5.25892341850447
TGGT1_259220	1.12098909714814	6.18086522834847	9.046837919197	1.26056540878109e-06	8.67439925364617e-06	5.25312287358891
TGGT1_232400	2.26704550227423	3.89552760133867	8.69151507614542	1.90426189896922e-06	1.1833627515023e-05	5.2524667037172
TGGT1_273050	-0.7499291319858	6.96306231222539	-9.07802931267777	1.21645648369112e-06	8.43440605580146e-06	5.24907410591527
TGGT1_236960	-0.9869645446943	7.24582563445542	-9.07645527967079	1.21864218732908e-06	8.44155175829472e-06	5.23823426173369
TGGT1_310520	0.93771184186243	5.90121425473061	9.01019616545724	1.31458818985254e-06	8.90362418113284e-06	5.22903354397867
TGGT1_301480	1.06891834922272	4.26411322919519	8.75969498053656	1.7576115234434e-06	1.12180131120737e-05	5.21790197074418
TGGT1_250100	-1.34145854936871	7.63162690680052	-9.06808286543845	1.23033926606861e-06	8.50645161440815e-06	5.21392227191966
TGGT1_316140	0.860745702829043	6.38952152580834	9.01850198952073	1.30212809510669e-06	8.83561013838411e-06	5.1999054174544
TGGT1_244640	-0.734523322700649	7.04733896584074	-9.03945838054669	1.27125051314389e-06	8.70693416125166e-06	5.19943137712209
TGGT1_235890	1.45769331213882	3.13816340029937	8.56764182724161	2.20541040239163e-06	1.31354027878387e-05	5.19923261605398
TGGT1_275310	0.861016252252313	7.11813617853393	9.03813260205468	1.27318044711541e-06	8.71198755385716e-06	5.19574325227115
TGGT1_248460	-1.0492974182432	5.66497992027936	-8.94087990369081	1.4237096571951e-06	9.45001832405249e-06	5.18671553335846
TGGT1_214340	0.804747833122308	5.89981596380735	8.97462080252337	1.3694249398555e-06	9.20676859288318e-06	5.18233079838352
TGGT1_297410	1.81562598101828	3.81974310784454	8.63710948361008	2.03070562786013e-06	1.23979922543039e-05	5.18036891828223
TGGT1_213660	-0.683465735657383	8.41533842936117	-9.05885316888139	1.24337399918626e-06	8.58844724579695e-06	5.17326243295691
TGGT1_288340	0.81163462833006	6.47465155904137	8.99763362438934	1.33367807226946e-06	9.00787370808244e-06	5.16941013819345
TGGT1_221350	0.887528195677122	4.98081828299146	8.84508559289071	1.59082192815891e-06	1.03431731770332e-05	5.16695245943957
TGGT1_225330	-1.02215584776996	6.75952947368045	-8.99925611353712	1.33119589624322e-06	8.99942609597175e-06	5.16267681992947
TGGT1_270760	1.26044628008182	6.06488306440577	8.95868197090133	1.39478607327225e-06	9.3257974597197e-06	5.15980213455612
TGGT1_240690	0.704982754218809	8.25568440540318	9.02588750687744	1.29115515068546e-06	8.80201664291914e-06	5.14140817962061
TGGT1_234900	0.868153991533935	8.65492547717194	9.03948777465991	1.27120775980471e-06	8.70693416125166e-06	5.13750533637781
TGGT1_275400	1.64205672667372	3.81321004222587	8.59776169233611	2.12775778026244e-06	1.27996427469345e-05	5.12632427929472
TGGT1_258622	2.73490451821854	1.3955069378885	8.38717619051369	2.7392093788655e-06	1.56026049421271e-05	5.12616518193409
TGGT1_294330	1.32633517581315	7.01660298378948	8.97758397407683	1.36476492269903e-06	9.19235212450184e-06	5.12607162243155
TGGT1_226830	-0.688556813464586	8.37922516556754	-9.01583932826398	1.3061086480097e-06	8.85439888650729e-06	5.12248855892578
TGGT1_409620	-0.919265830800758	7.21887645083659	-8.97893086827126	1.36265237013552e-06	9.18658996397638e-06	5.12023138227176
TGGT1_307590	1.95681437804525	2.75291492549884	8.44288076020555	2.56099769241257e-06	1.48185044625107e-05	5.11099468011552
TGGT1_261450	0.796829683498639	7.45894001021378	8.97654780441971	1.36639250997677e-06	9.19484020525803e-06	5.11078180527791
TGGT1_233120	0.846755706009377	7.26166820428594	8.97193280260614	1.37366699739092e-06	9.21832728827627e-06	5.11070653659578
TGGT1_207720	1.22732587541297	6.23351248691121	8.92364659920359	1.45232366174359e-06	9.61375119567222e-06	5.10117575834446
TGGT1_211470	1.62044153162622	3.24478762572191	8.49319262223179	2.41070448994251e-06	1.41278495689654e-05	5.09455431712769
TGGT1_236010	-0.750464324821281	6.96260762386009	-8.95044349766281	1.40809213671687e-06	9.38534575965549e-06	5.09347452484275
TGGT1_231180	-0.963758653156647	6.05445596828778	-8.89850694225562	1.49517866860479e-06	9.85540675830738e-06	5.08561114223517
TGGT1_268290	1.00606593281972	6.23716615291154	8.91524119061571	1.46650349074132e-06	9.68130759741426e-06	5.08561022390981
TGGT1_236980	-0.801223422919176	7.19978227958261	-8.9499895482442	1.40882926906706e-06	9.38534575965549e-06	5.08536278214329
TGGT1_247440	-0.864641985774585	8.67169791872443	-8.99552688178422	1.33690850901018e-06	9.02135492506593e-06	5.08340738075529
TGGT1_294680	-1.07941182975059	4.87721891958337	-8.743217588265	1.79190633717065e-06	1.13631205997596e-05	5.08280654408376
TGGT1_207970	1.38086798829277	4.53033690943905	8.68055039615568	1.92904793730688e-06	1.1967302483734e-05	5.07648234879839
TGGT1_261540	0.992484598363406	6.09642533585258	8.88881521763998	1.51206096738644e-06	9.9461220068948e-06	5.06369448682019
TGGT1_233200	-1.31597858606883	3.87272982575131	-8.55435827525217	2.24061854205196e-06	1.32801624536218e-05	5.05959123469763
TGGT1_244350	1.00154415311358	4.99740835142175	8.75599888086889	1.76524253175611e-06	1.12423548046007e-05	5.05779325736015
TGGT1_240440	-1.00236797410794	4.88544618264191	-8.71931203567696	1.84294498744551e-06	1.15607227195294e-05	5.04767758583282
TGGT1_274100	-1.12417063299148	4.74521804628891	-8.68476778710397	1.91947363390003e-06	1.19180232086163e-05	5.03898980654038
TGGT1_244240	1.19844535747896	6.89159681676264	8.89827933773369	1.49557280992924e-06	9.85540675830738e-06	5.03304077534153
TGGT1_298610	0.697009934753517	8.52847775103365	8.94796662860283	1.4121191703805e-06	9.39054755297263e-06	5.03239707025357
TGGT1_223915	2.32418694432065	1.39819498824906	8.30497111267375	3.02693296569156e-06	1.69378454159831e-05	5.02970191173725
TGGT1_294010	1.03140169341469	6.6380986626875	8.88754333642208	1.51429164735537e-06	9.95183755294341e-06	5.02935383358071
TGGT1_306280	-0.823841267823948	5.65076094647814	-8.81717177797836	1.64339342593733e-06	1.06282470413717e-05	5.02673007687041
TGGT1_249930	0.964290093127843	4.47355678773906	8.64212340576272	2.01868412351328e-06	1.23555641328602e-05	5.02471619193553
TGGT1_293200	1.0020706242144	4.83111939933341	8.69965844193635	1.8860748578919e-06	1.1750584025127e-05	5.0213368193267
TGGT1_232035	-0.863765627738375	5.16885424869759	-8.74279954074044	1.7927857213359e-06	1.13631205997596e-05	5.01465471979408
TGGT1_321390	2.01358850354363	2.85018649935695	8.37029551503105	2.79580660502823e-06	1.58754892537267e-05	5.01107873758845
TGGT1_229630	0.777270767724878	8.64767376229385	8.93517592323652	1.43311286161229e-06	9.50380108227097e-06	5.01023758832521
TGGT1_214575	1.35612054974059	5.43117491562238	8.76709193568704	1.74244585086755e-06	1.1160205327029e-05	5.00999740990315
TGGT1_288265	3.29671059989065	0.622959621199238	8.32531969514834	2.95281381947247e-06	1.6636832433223e-05	5.00740900144043
TGGT1_271750	-1.10527269037276	4.24166269271495	-8.57243226044675	2.19285938898123e-06	1.30886574981665e-05	5.00129088458708
TGGT1_314260	-0.775447889088287	7.69361456554398	-8.89205199065884	1.50640007917887e-06	9.91781241318843e-06	4.99904584984405
TGGT1_234310	-0.767857054440186	6.11858718067102	-8.83738813123106	1.60513616989056e-06	1.04097752485801e-05	4.99871850835667
TGGT1_215500	1.12359232890287	5.03776308796282	8.71055258160044	1.86203538953797e-06	1.1650474851664e-05	4.99858065519879
TGGT1_310470	-0.934239895705709	7.21273330778869	-8.87847945098079	1.5302909869019e-06	1.00283482813617e-05	4.9969968387839
TGGT1_312940	-0.807412255245761	7.50719132786923	-8.88303213510215	1.52223213051872e-06	9.98606140918384e-06	4.99393578648837
TGGT1_203720	1.94039634051015	4.06640723164773	8.51485347042147	2.34893802054333e-06	1.37990667637706e-05	4.98971214104444
TGGT1_218770	1.10492565237835	4.6273611346338	8.6356480433115	2.03422405957606e-06	1.24091063667628e-05	4.98805094208341
TGGT1_222000	0.90165011518759	6.46453269586178	8.83913475364397	1.60187605222541e-06	1.04057868352563e-05	4.9761560614105
TGGT1_266070	-0.668967504694656	9.65488131454119	-8.94719227821979	1.41338069003314e-06	9.39054755297263e-06	4.97413423927323
TGGT1_314110	-0.820614823687567	6.215334378517	-8.82102999529146	1.63601724210713e-06	1.05899149737103e-05	4.97209321763696
TGGT1_245480	-1.3788928339856	4.37479836963526	-8.56120220513462	2.22240393387938e-06	1.32258370918489e-05	4.97168901642515
TGGT1_308840	-0.692597579699004	10.3139034305251	-8.95963652855305	1.39325310840961e-06	9.32407849474122e-06	4.96237366584383
TGGT1_243560	3.06597566239527	1.32308407393483	8.23262576561044	3.30703647021019e-06	1.81849680393499e-05	4.94159451719957
TGGT1_285850	0.883123560088115	5.69206678091676	8.75656857682047	1.76406401592305e-06	1.12423548046007e-05	4.93911903940499
TGGT1_316680	0.82998527208962	7.96072430897495	8.85070367095341	1.58046108244182e-06	1.02849595641005e-05	4.9385851382053
TGGT1_321530	-0.784574714503983	7.58419958389664	-8.83717969786813	1.60552569199167e-06	1.04097752485801e-05	4.93491362450985
TGGT1_228150	0.976468781203772	8.34125545041914	8.85962900865609	1.56414972245844e-06	1.021519765123e-05	4.93187669386623
TGGT1_203440	1.25578615815795	4.03225616005122	8.48316752059488	2.43987922838781e-06	1.42873697123863e-05	4.92750639821143
TGGT1_262910	-1.00521707293314	4.923027103921	-8.62672468564096	2.05584957805491e-06	1.2488901676164e-05	4.92419872395216
TGGT1_315440	-1.57195434092054	6.26139382419376	-8.76544118664197	1.74581809297787e-06	1.11622385157326e-05	4.92312265633342
TGGT1_313870	0.951995063371247	6.74484784364392	8.8009341036742	1.67483052113245e-06	1.08124217742367e-05	4.91712578959169
TGGT1_281600	2.41039731137931	1.32323949423671	8.20535706976966	3.41971972162983e-06	1.86920805726782e-05	4.91089582661417
TGGT1_248400	0.753230875622491	6.76188873956477	8.78642612993761	1.70346539942006e-06	1.09778881295959e-05	4.8972523650335
TGGT1_249320	0.927917091831321	7.23142484474151	8.78978676675671	1.69678592899174e-06	1.09444938826757e-05	4.88680281294548
TGGT1_360620	-0.835650174191575	5.44399848704419	-8.67400765746461	1.94400283807187e-06	1.20184806989352e-05	4.87965664719447
TGGT1_253420	0.783712627127393	5.66809763003147	8.70608371146169	1.87185655760824e-06	1.1691904036753e-05	4.87619674072621
TGGT1_226870A	0.865822220612337	6.52546178470761	8.75460574389961	1.76812804221285e-06	1.12423548046007e-05	4.86781156159308
TGGT1_305770	1.02267289789026	4.84809404425522	8.5761471514911	2.18317908953242e-06	1.30455214932976e-05	4.86397275984594
TGGT1_230480	-0.857395200593462	6.11053343272588	-8.72608640200066	1.82832500947969e-06	1.15177802858265e-05	4.86344308960761
TGGT1_263040	0.708409115149082	10.2624944157407	8.87784220720253	1.53142264395178e-06	1.00283482813617e-05	4.86335700791532
TGGT1_462962	0.983886555283454	5.49159392114264	8.6664545961627	1.96142198442222e-06	1.20860639647197e-05	4.85780820317564
TGGT1_315160	-0.795196909436808	6.72906663542825	-8.75266964146662	1.77214657297803e-06	1.12518220289517e-05	4.85772055008218
TGGT1_255730	2.27107135565679	1.56806804148753	8.16189942631073	3.60789527216512e-06	1.94730418382442e-05	4.855829578629
TGGT1_203985	3.42424235440715	0.934308485496996	8.17472561280773	3.55122807943461e-06	1.91813561008929e-05	4.8547116386018
TGGT1_294860	1.35059986965011	6.28379104010766	8.72467012543362	1.8313711948728e-06	1.15177802858265e-05	4.85423349594212
TGGT1_306490	-0.799897034089588	7.2410033982026	-8.76329749369078	1.75020781105091e-06	1.11805233244406e-05	4.8532921144037
TGGT1_254600	-1.21681569824876	3.69248720196212	-8.36512633411012	2.81338761429924e-06	1.59505327271519e-05	4.85294798424213
TGGT1_366480	1.4148425699733	6.54205255548466	8.73253083728696	1.81453258397098e-06	1.14603304855112e-05	4.84753532264937
TGGT1_269920	-0.84868762598323	8.90604941407116	-8.8079393993421	1.66118936248986e-06	1.07338389576268e-05	4.84020723140146
TGGT1_307860	0.717299177974795	8.33962753117325	8.78047356673994	1.71536587628975e-06	1.10254123341473e-05	4.83484516753204
TGGT1_294180	0.746200207201173	5.91812670138004	8.69522235090237	1.89595899471539e-06	1.18021024986201e-05	4.83360989579959
TGGT1_219160	1.11897207327456	3.99542482656893	8.39427126810248	2.71578907135264e-06	1.54933540464052e-05	4.8189627773497
TGGT1_288620	-0.835359203251237	5.36100369094394	-8.61112744815185	2.09424393382269e-06	1.2669482341371e-05	4.81463901868914
TGGT1_286410	0.846893529434865	7.60768788594008	8.73949424395198	1.79975491678305e-06	1.13875402007364e-05	4.81318339120374
TGGT1_271380	-0.746497231294581	6.36896960041453	-8.70217046898896	1.880502307279e-06	1.17292555582801e-05	4.81207709097431
TGGT1_280500	1.81924453824359	3.94002056930621	8.35994892183037	2.83111553941147e-06	1.60385987302473e-05	4.81080245782855
TGGT1_305920	0.814379790638122	5.86422865815568	8.66892849988656	1.95569819659367e-06	1.20609640681068e-05	4.80768945618198
TGGT1_242610	1.02651301247415	4.55859553767876	8.48062753680967	2.447331006814e-06	1.43195316235362e-05	4.80532746169467
TGGT1_203450	-0.789288842943689	6.01023787137481	-8.6733467735636	1.94552034302687e-06	1.20184806989352e-05	4.80469255581927
TGGT1_227290	0.784093547787485	7.37586180636258	8.72500193533038	1.83065703619236e-06	1.15177802858265e-05	4.80193309229471
TGGT1_293240	0.987315021187543	6.90231575161901	8.70702590724831	1.86978129126227e-06	1.16889321441785e-05	4.79420752224852
TGGT1_289110	1.10945003799215	4.85752310286386	8.51785470258238	2.34051476026455e-06	1.37648396705309e-05	4.79178730918919
TGGT1_212900	-0.774587614390094	6.59124263934273	-8.69416449183854	1.89832423216809e-06	1.18067689265399e-05	4.79048200445684
TGGT1_309830	1.95334068051944	1.78461105575183	8.11655339616146	3.81613917267486e-06	2.02089457057304e-05	4.79029871064531
TGGT1_202160	0.795791050696555	6.2663337758827	8.67724607974464	1.93658519986461e-06	1.20038716205349e-05	4.78420992199971
TGGT1_310760	1.02388023143449	6.13860303587711	8.66346514825094	1.96836257424929e-06	1.21084121991698e-05	4.78079537208769
TGGT1_268860	3.0595722330579	0.790650159381868	8.11243046381296	3.83570210939418e-06	2.02978356375472e-05	4.77993266985825
TGGT1_309095	2.28614460557338	2.42178373016517	8.14002686953017	3.70677819029967e-06	1.98019992797588e-05	4.77855959166775
TGGT1_240850	0.835067542150971	5.24346253076542	8.57131836852171	2.19577094865246e-06	1.30886574981665e-05	4.77398190893502
TGGT1_215940	-0.886033422320687	5.34209027565923	-8.57175336572896	2.19463343259026e-06	1.30886574981665e-05	4.77056037369113
TGGT1_313240	0.748664254982376	6.57307305745746	8.67567359974931	1.94018317895962e-06	1.20058075121397e-05	4.76582277544201
TGGT1_312970	2.68284508890266	1.16916011947644	8.0839440239721	3.97383986274483e-06	2.08776575966494e-05	4.76343133277138
TGGT1_251470	-0.931196286407634	5.92181505928539	-8.62795982939737	2.05284158239476e-06	1.2488901676164e-05	4.7615331836121
TGGT1_277055	1.75855301351749	2.88575295457698	8.18050440707127	3.52600932796253e-06	1.91027672960417e-05	4.76150856936232
TGGT1_313130	1.16266439892066	5.87609008177708	8.61669540137847	2.08045018587051e-06	1.26173692600346e-05	4.75102103707514
TGGT1_258580	-0.627220686711543	10.1045445820981	-8.78163584610406	1.71303523060453e-06	1.10201245292763e-05	4.75020684118946
TGGT1_235635	1.70770894217752	4.65143621482355	8.41928796293338	2.63490967989665e-06	1.51621416855785e-05	4.74084502177653
TGGT1_217530	-1.22199366202618	8.38323027053439	-8.70192482173744	1.88104645789604e-06	1.17292555582801e-05	4.73143278393099
TGGT1_203135	4.26048376293785	1.80297938453875	8.05562224948766	4.11647785154812e-06	2.14370060850014e-05	4.73059273997266
TGGT1_249870	-0.789023120904593	5.49951541986195	-8.55942206682557	2.22712629747228e-06	1.32323894162012e-05	4.72481627026689
TGGT1_222305	3.3960657143201	0.920925260846106	8.06023082150934	4.0928986535686e-06	2.13802025448744e-05	4.72062444966454
TGGT1_222710	-0.754220241911794	6.40648570615785	-8.62860059013289	2.05128297309748e-06	1.2488901676164e-05	4.7175305095474
TGGT1_312240	2.72929232993459	2.65295103823476	8.09689964134446	3.91036509742982e-06	2.05885793458337e-05	4.71192314864091
TGGT1_293550	-0.869756142808071	6.9753344528201	-8.64135087343877	2.02053137722584e-06	1.23565215939468e-05	4.70924419934235
TGGT1_315220	-0.707695137580685	8.25601387881962	-8.67645512522799	1.93839408054466e-06	1.20049016445935e-05	4.70762417871445
TGGT1_236290	3.34676797347364	0.396835075075091	8.07213431997193	4.03266299663885e-06	2.11259506662629e-05	4.70674106830654
TGGT1_284540	0.797117374725566	6.89299402720762	8.63717222200288	2.03055473087084e-06	1.23979922543039e-05	4.70626360115912
TGGT1_305050	-0.984158308792597	7.4709444777906	-8.65070894342107	1.99827625363136e-06	1.22409076794115e-05	4.70496918303602
TGGT1_262430	-0.763143027386659	6.35139266945496	-8.61329847652124	2.08885390502255e-06	1.26473441076262e-05	4.70180511282804
TGGT1_231600	0.707569797223469	7.02286411032307	8.63477943361364	2.03631834568698e-06	1.24115216599503e-05	4.69906196195013
TGGT1_252500	-0.658502432054416	7.7138530959639	-8.65160356018118	1.99616251975737e-06	1.22382178644185e-05	4.69903460265957
TGGT1_316340	-0.677559958186153	9.36338639517142	-8.71387363903671	1.85477258844687e-06	1.16149769291942e-05	4.69828129734099
TGGT1_205750	-0.783666525487439	6.021488702537	-8.58166510949051	2.16888489698777e-06	1.30026339845666e-05	4.68805908858013
TGGT1_290730	0.721744862539861	6.83253399604524	8.61565085789165	2.08303043226559e-06	1.26225426194004e-05	4.68087126880259
TGGT1_314875	0.907473289546301	7.28009394333852	8.62447951765509	2.06132944898394e-06	1.25117903763909e-05	4.67835213939544
TGGT1_210450	1.78948621125494	2.81048613096704	8.10061349962868	3.89237045648067e-06	2.05382262064699e-05	4.67070908959736
TGGT1_284560	0.661650636974457	10.5083935287803	8.72997831613977	1.81998210083873e-06	1.14757801492057e-05	4.66975355961828
TGGT1_311430	0.79701311348707	7.78060750497588	8.62685837337917	2.0555237746896e-06	1.2488901676164e-05	4.66603092694073
TGGT1_237010	0.696904498612207	6.79196223495382	8.59999535127803	2.12211718881195e-06	1.27851874821416e-05	4.66230764081991
TGGT1_288685	0.950807536176181	5.87901585671283	8.55081270049206	2.25011776390176e-06	1.3314866897647e-05	4.66088894145688
TGGT1_356970	1.66832356854842	2.62529384898932	8.07509064951705	4.01785072919079e-06	2.1063452746719e-05	4.66060426018521
TGGT1_249650	0.737720601135549	5.83581429114844	8.54918837441543	2.25448404752267e-06	1.33299105334107e-05	4.65794400949691
TGGT1_207470	1.43900085733733	3.77091197345571	8.22074142919455	3.35564922629031e-06	1.84107241334306e-05	4.65203259241884
TGGT1_228270	1.17323945434185	4.32254156307571	8.31320121502053	2.99671750029333e-06	1.67816180016427e-05	4.64858750721644
TGGT1_212210	-0.950901104984271	6.87836389302474	-8.5883965850064	2.15158297073629e-06	1.29094978244177e-05	4.6463978569952
TGGT1_280370	-0.703288574445467	9.50051736077489	-8.67071528354037	1.95157532803477e-06	1.20457031227011e-05	4.63751892282422
TGGT1_213050	-1.07667629390596	7.85104353660676	-8.60344488095781	2.11343770233566e-06	1.27644650650157e-05	4.63127505091243
TGGT1_316150	-0.693649961220762	6.25900645814069	-8.55332075534228	2.2433937793745e-06	1.32858360937349e-05	4.63064882659886
TGGT1_281640	0.918253135557854	5.32945522759491	8.46740836706141	2.48650954593511e-06	1.45255090021533e-05	4.6299699378131
TGGT1_321420	-0.842910702595725	5.86727882430898	-8.51760005179916	2.34122820340312e-06	1.37648396705309e-05	4.62478412455686
TGGT1_309160	-0.991558761627031	5.26235362784826	-8.43806331208865	2.57590718096702e-06	1.48755955710652e-05	4.61978526888161
TGGT1_249600	1.18146078196234	5.26818121072493	8.43914679502657	2.57254581878585e-06	1.48735481358283e-05	4.61610774870211
TGGT1_293258	1.29682767564788	4.2758527586025	8.27345827301773	3.14568297832398e-06	1.74844935672135e-05	4.61231691670789
TGGT1_319720	1.28624416352668	4.3951772715698	8.29437355344382	3.06632225698361e-06	1.71320206835139e-05	4.61193558815385
TGGT1_295935	-0.7128520952881	8.25265048166495	-8.59765823711375	2.12801942221201e-06	1.27996427469345e-05	4.60838189716849
TGGT1_260340	0.94877678186636	4.52007405202078	8.31837376522319	2.97789298195147e-06	1.67403399323856e-05	4.60467611666624
TGGT1_224290	0.775615609679871	7.38376061856402	8.5596154033384	2.22661289211401e-06	1.32323894162012e-05	4.59342051531118
TGGT1_230000	0.919623151859304	7.44078714046927	8.55734668826842	2.23264547617815e-06	1.32436470291477e-05	4.58873927862516
TGGT1_262690	-0.616971478012235	10.2932003480612	-8.65810201284262	1.98088030712257e-06	1.21649355331527e-05	4.58785422983862
TGGT1_261970	-0.741082814010353	6.25813042173508	-8.51852790145586	2.33862981391305e-06	1.37648396705309e-05	4.58741142487875
TGGT1_203780	0.714890376786873	6.65058910907573	8.53583510305913	2.29072492849439e-06	1.35113944934923e-05	4.58596816771806
TGGT1_252260	1.36684606016348	3.44971796816035	8.12088707212502	3.79569150422164e-06	2.0159094122712e-05	4.58273395126132
TGGT1_267380	-1.43429228004237	3.49656847306351	-8.11781460298785	3.81017624301126e-06	2.02060162371663e-05	4.58083820749518
TGGT1_310180	0.70012571523894	6.71362564256051	8.52971676082202	2.30753855312652e-06	1.35995901179425e-05	4.57585450528506
TGGT1_268610	-1.14846565002572	5.55388415492235	-8.43377282226367	2.58926420178102e-06	1.49347614732562e-05	4.57410770389051
TGGT1_218960	-0.706796791586835	8.67174017462381	-8.57620278506611	2.18303446803578e-06	1.30455214932976e-05	4.56114421570799
TGGT1_311810	1.01068218763614	5.34331806733762	8.41225954448224	2.6573683909331e-06	1.52673334913043e-05	4.56043381165209
TGGT1_273540	-1.32230787843998	4.68349757007758	-8.28607276870088	3.09755867509289e-06	1.72537795713253e-05	4.55731625357748
TGGT1_289700	-0.928444771531561	6.31260872480365	-8.49469882577176	2.40635362457235e-06	1.41136695733345e-05	4.5572895878676
TGGT1_228030	1.04116806539335	4.7262406673349	8.31373314913723	2.99477575237607e-06	1.67816180016427e-05	4.55723737689924
TGGT1_269190	0.690299860128022	9.23383520976494	8.59498353014329	2.13479585237264e-06	1.28298421785685e-05	4.5538757367608
TGGT1_245770A	2.2757902463878	3.36230781634687	8.05945654168341	4.0968500245821e-06	2.13855571283186e-05	4.55011379245168
TGGT1_310790	-0.687563136791114	8.98793713687793	-8.58045426704534	2.17201294300572e-06	1.30107135962998e-05	4.54963760631435
TGGT1_242090	-0.676842928932616	9.79010318865837	-8.60059240293368	2.12061219198531e-06	1.27851874821416e-05	4.53574997555215
TGGT1_238070	0.832624695001996	5.83001898419313	8.44972255610474	2.53998196034438e-06	1.47553165073106e-05	4.53445914731362
TGGT1_243490	0.782588900702594	5.82963055889454	8.44998018108316	2.53919424503789e-06	1.47553165073106e-05	4.53332224355588
TGGT1_233540	-1.0355545087153	5.59653642548359	-8.40578922619436	2.67822534606706e-06	1.53509575129867e-05	4.52552319250842
TGGT1_289940	1.09448070755431	6.04881956573558	8.4454870231521	2.55297020150528e-06	1.47954847205397e-05	4.51441355763766
TGGT1_203760	0.790889578973245	6.41753940439247	8.46512303456108	2.4933506992422e-06	1.45422241899936e-05	4.50680286895422
TGGT1_253870	1.22937123396307	5.77261112701219	8.40772055838049	2.67198140667098e-06	1.53271900470577e-05	4.50063245540583
TGGT1_258060	0.692330462726809	6.94877890215225	8.47554483503102	2.46231600951245e-06	1.43956843180136e-05	4.49928901959447
TGGT1_269650	0.915267744098416	6.34819402853187	8.44822227340375	2.54457444352786e-06	1.4770254196427e-05	4.49076969590689
TGGT1_229770	0.785984992950144	5.83132093693902	8.41651641699696	2.64374150780225e-06	1.52009936577646e-05	4.49044932222005
TGGT1_272383	-1.25519403322624	3.82919084074892	-8.0988024472325	3.90113437942976e-06	2.05588892804979e-05	4.48694927463292
TGGT1_266870	0.75853202501287	6.41045167102975	8.44730815787785	2.54737698986963e-06	1.47747865412438e-05	4.48402470398953
TGGT1_259710	-0.714002811823195	6.72596687360504	-8.45459038298644	2.52514229075472e-06	1.47125225795781e-05	4.48076794723294
TGGT1_262040	0.693734095529085	6.60608826029872	8.45202624343422	2.53294749406896e-06	1.47378823938343e-05	4.48064478749586
TGGT1_205580	0.672468699436248	6.38773221851592	8.44311564782747	2.56027311131891e-06	1.48185044625107e-05	4.47893231173809
TGGT1_365020	4.63705431888384	0.150577448516172	7.87228659602219	5.18336517850637e-06	2.58920251022041e-05	4.47874005575622
TGGT1_239350	1.14217497384476	5.26282784716087	8.32349400718753	2.95938367709984e-06	1.66490961603123e-05	4.46578985538344
TGGT1_408560	1.51152744223025	3.65701739139217	8.05466904424301	4.12137295421825e-06	2.14370060850014e-05	4.46239928187399
TGGT1_236950	0.795626971547081	8.99414629105823	8.51060127525862	2.36092797261341e-06	1.38583627500874e-05	4.45967890417171
TGGT1_243390	1.37117706822907	4.4286605271433	8.17670816512243	3.54255446822144e-06	1.91486598030786e-05	4.45628734293174
TGGT1_411270	-1.37456200203775	3.4428708722746	-8.01415835875256	4.33528839945444e-06	2.24061440051012e-05	4.45466455505201
TGGT1_316900	0.725151979683371	6.62288610867527	8.43128563983875	2.5970412276123e-06	1.49560104739091e-05	4.4536610622367
TGGT1_216290A	1.07878265551359	4.55937139353986	8.20430292422934	3.42415762618807e-06	1.86980771604024e-05	4.45266105151959
TGGT1_207840	0.689753225917646	10.1666541482293	8.54571127570423	2.26386128617903e-06	1.33637304356998e-05	4.45032392682663
TGGT1_244700	0.620500184418493	10.2489025528401	8.54825349603309	2.25700117710374e-06	1.33340053373275e-05	4.45028065774411
TGGT1_408550	3.55777978683349	0.864951663395526	7.83641107632805	5.42488288358744e-06	2.68416006183189e-05	4.44982172661792
TGGT1_295360	-0.880996380849687	8.11358286874916	-8.46526413592879	2.49292772726165e-06	1.45422241899936e-05	4.44516987986204
TGGT1_297730	-1.05073456705716	4.73325982206591	-8.21615972451859	3.37459478282732e-06	1.84730626763311e-05	4.4424012972594
TGGT1_247400	-0.843707200194555	6.26749635502283	-8.40230930273117	2.68951537868049e-06	1.53794823062575e-05	4.44050230841509
TGGT1_217660	-1.35831187142866	5.50440427697109	-8.31368116250226	2.99496546250062e-06	1.67816180016427e-05	4.43973553803083
TGGT1_234507	1.96776554485873	2.27090634973006	7.85627860646991	5.28967865928327e-06	2.633308694962e-05	4.42744744203173
TGGT1_219730	-0.896955984570702	7.69433226860681	-8.43772072579866	2.57697098973297e-06	1.48755955710652e-05	4.42733303099625
TGGT1_215510	0.890473892029897	6.32862511431787	8.3976687256497	2.70465046058577e-06	1.54455515825161e-05	4.42679162805777
TGGT1_312230	-0.730070177122583	7.68993561404154	-8.43176297429259	2.59554673738072e-06	1.49560104739091e-05	4.42038505582861
TGGT1_254340	-2.32199604369528	1.63650092842692	-7.8088159126433	5.61884999313394e-06	2.76143616340436e-05	4.41931963598305
TGGT1_271100	0.828567462741811	6.62996587338002	8.40231907613112	2.68948359911291e-06	1.53794823062575e-05	4.41701600169057
TGGT1_221675B	-0.751507272404068	6.31081743663351	-8.38614028044364	2.74264692414312e-06	1.56100184747959e-05	4.41477180998088
TGGT1_292920	0.757927786795869	8.52663728391802	8.45411881929428	2.5265757850808e-06	1.47125225795781e-05	4.41294105236284
TGGT1_263330	-1.66834923742864	4.58951712807772	-8.13676247792702	3.72178350390452e-06	1.98531341945505e-05	4.40394631115547
TGGT1_205730	-1.23267908912547	3.63148682716514	-8.00032985627878	4.4110082460415e-06	2.27492224855831e-05	4.39691424828069
TGGT1_263070	0.694344804196383	7.6591923626293	8.40899276772012	2.6678769240156e-06	1.53156673689757e-05	4.39291624271242
TGGT1_287170	-0.825870837385085	6.00865142326833	-8.34235505786829	2.89225948370093e-06	1.63596225285498e-05	4.38472936639577
TGGT1_234930	-0.943428948765262	5.55342715043881	-8.29304852581514	3.0712856843533e-06	1.71466430720045e-05	4.38234042334709
TGGT1_288280	1.3855585974253	4.34542484110559	8.09864177913766	3.90191289436926e-06	2.05588892804979e-05	4.37355309517347
TGGT1_201240	1.26054778936182	4.90110726551452	8.19030100955025	3.48369436693094e-06	1.8932522108217e-05	4.37017109509466
TGGT1_239083	1.84887502056842	1.92153399686715	7.78948524235934	5.75914217384405e-06	2.81712255732613e-05	4.36972588287856
TGGT1_255340	0.688430497184891	7.40836410607595	8.38273320257383	2.75398558614147e-06	1.56623553801727e-05	4.36672292540825
TGGT1_205170	1.01238213402708	7.86151434020361	8.39079850128305	2.72722545641466e-06	1.55464614941329e-05	4.36130346285972
TGGT1_252270	0.907276588827702	5.32419751757803	8.2562534536891	3.2126160497563e-06	1.7772746473595e-05	4.35880227403271
TGGT1_216370	-1.0424162642671	4.74194295671763	-8.15255256861736	3.64980075858606e-06	1.95979015016509e-05	4.35763536290172
TGGT1_241240	-1.43184496395035	8.37819568990588	-8.40419170259842	2.68340192033223e-06	1.53685746346301e-05	4.35262765361687
TGGT1_281380	1.08910062823742	4.66226781014439	8.14176597193842	3.69881060736665e-06	1.97738902111452e-05	4.34915300512448
TGGT1_200330	-0.769763407608462	7.34322153554028	-8.3656359507585	2.81164908882249e-06	1.59505327271519e-05	4.34606269081484
TGGT1_245475	-1.38071657371477	4.48341719366527	-8.0877635853435	3.95501228969718e-06	2.08086607725752e-05	4.3435438851282
TGGT1_239710	0.723111044992942	5.47722765650179	8.26768426926673	3.16797772771168e-06	1.75656913764165e-05	4.34315009019219
TGGT1_217460	0.625942966495445	8.63015046642202	8.39747129673307	2.70529639102636e-06	1.54455515825161e-05	4.33466716020484
TGGT1_290180	1.03889977769987	4.21375822324464	8.05507243025776	4.1193006394924e-06	2.14370060850014e-05	4.33317033537294
TGGT1_213780	0.822277193911136	5.32186167547708	8.23670812258038	3.2905123207479e-06	1.81213745591753e-05	4.33137295545203
TGGT1_258770	-0.719402055380115	6.68821804967177	-8.33430939866534	2.92069113281078e-06	1.64949078814383e-05	4.32757091680872
TGGT1_254030	-0.825343079738111	6.35053888424505	-8.31758573162418	2.98075267370194e-06	1.67435361563519e-05	4.32515087866911
TGGT1_300300	1.00548755233721	4.32354094582964	8.06694499794155	4.05880506106195e-06	2.12476700474504e-05	4.3236853001796
TGGT1_270150	0.790067598841007	7.07287707444323	8.34113690223895	2.89654504887311e-06	1.6371191969965e-05	4.32280273660126
TGGT1_257710	0.681902808703799	6.34074037520502	8.31651934302041	2.98462717703381e-06	1.67524235098027e-05	4.31855851235134
TGGT1_264700	2.8547420720843	0.78847212062783	7.72146155263759	6.28342003121169e-06	3.0430240946385e-05	4.31322083337994
TGGT1_293510	-0.816930081343077	6.98790875034132	-8.33113788198426	2.93198084001102e-06	1.65331141811732e-05	4.31271780220939
TGGT1_287430	1.79693563177094	3.13560582801887	7.85828342340377	5.27623712452363e-06	2.62840769638846e-05	4.31045036500174
TGGT1_266680	0.941437033036457	5.84573353720667	8.27112348570973	3.15467779854428e-06	1.75079174660412e-05	4.30528262630496
TGGT1_215040	0.855982852167343	7.62929476442441	8.33242724630247	2.92738542981334e-06	1.65199480471629e-05	4.29498173395844
TGGT1_275360	3.42582083785885	0.577285359322167	7.71512381818784	6.33480624894695e-06	3.06182302032436e-05	4.29200483058474
TGGT1_257110	1.19280354827513	4.61307411333274	8.08428319756074	3.97216411152828e-06	2.08776575966494e-05	4.29028706308581
TGGT1_270450	0.750527989155348	5.83890579773444	8.26116134313559	3.1933682413989e-06	1.76930516361965e-05	4.28820971421563
TGGT1_261690	-1.21369783674976	4.11813167397535	-7.99208876167536	4.45680637925236e-06	2.29125433690634e-05	4.28724015873193
TGGT1_359590	1.49685158418369	3.80899807782582	7.94198325862077	4.7464535398779e-06	2.41217541512014e-05	4.28469255303958
TGGT1_271110	0.692218430617053	6.34809642025494	8.29005900146102	3.08251583475656e-06	1.71830859804736e-05	4.28397670309444
TGGT1_218580	0.82315017448254	6.51379443088684	8.2920598668262	3.07499471922871e-06	1.71542453497125e-05	4.27957173652199
TGGT1_310250	1.0495429983725	5.09025031945342	8.15744493283974	3.62780175133728e-06	1.95084438548733e-05	4.2791633196384
TGGT1_313210	1.90594246106288	3.68566016896916	7.90366788407487	4.98153564634485e-06	2.51017348181988e-05	4.27357139266522
TGGT1_224200	0.847529618638708	5.55053278017972	8.2183751728328	3.36541952369809e-06	1.84504770286464e-05	4.27176792568569
TGGT1_219485	0.946013051603279	6.31523025514811	8.27333527712918	3.14615613586285e-06	1.74844935672135e-05	4.26786864581209
TGGT1_249750	3.7804515894799	0.402236517878867	7.69578080682779	6.49443991429261e-06	3.11630774088315e-05	4.26484940292761
TGGT1_357490	-1.03472541079225	4.63921712525086	-8.05635681998972	4.11270977947098e-06	2.14370060850014e-05	4.25298035485447
TGGT1_285825	2.58419915754903	1.30566080891492	7.66883056882154	6.72407276347791e-06	3.20754071511074e-05	4.25231724376968
TGGT1_292100	-0.936042967885639	5.73531681603949	-8.20921656217978	3.40352398018279e-06	1.8617479975431e-05	4.24736218773473
TGGT1_262050	-0.853071467604839	8.55736475804327	-8.32473191627289	2.95492727125389e-06	1.6636832433223e-05	4.24435786405407
TGGT1_324600	-0.856225543635151	9.32087479075677	-8.35346959140748	2.85347032731681e-06	1.61527197149738e-05	4.24250192535961
TGGT1_286595	-0.978996664043897	5.20820427292246	-8.13794558661633	3.71633764096976e-06	1.98385649964989e-05	4.2407992985234
TGGT1_208440	0.729578302955961	7.20928596021105	8.2784103037963	3.12669606294979e-06	1.74028140350625e-05	4.23743935002111
TGGT1_462973	2.45224223936078	1.89510188887755	7.67753454400648	6.64897361881194e-06	3.17586269322076e-05	4.23639409278476
TGGT1_219742	2.46944225452762	1.00180208242137	7.64954064519085	6.89376386682189e-06	3.27140430771002e-05	4.23004176759539
TGGT1_244080	-0.76588984950844	6.76930211107025	-8.2595553974998	3.19965280795641e-06	1.77144414549587e-05	4.22772407445934
TGGT1_250020	-1.6739858285377	2.57626066510961	-7.72909632906301	6.22210922592345e-06	3.01933427775887e-05	4.22716842045677
TGGT1_251510	0.8355066761647	6.37654727808153	8.24598238509057	3.25330099565506e-06	1.79570420515462e-05	4.22689441061111
TGGT1_289218	3.02488023070968	0.694248484375927	7.65353907741221	6.85821725974991e-06	3.25876799312434e-05	4.22539913411683
TGGT1_363030	-0.628532651467374	10.5354004276904	-8.37917045086337	2.76589612713568e-06	1.57178607286995e-05	4.22252363200851
TGGT1_288920	0.782105361596022	7.54041028055243	8.27099788318893	3.15516246617081e-06	1.75079174660412e-05	4.21812916406511
TGGT1_223668	0.810084309592749	5.16716122889368	8.11936228896377	3.80287249631283e-06	2.01825651438302e-05	4.20554298020065
TGGT1_239070	0.783062546826822	5.74376628310193	8.18570373825241	3.50348340029907e-06	1.90218846132137e-05	4.20144390132791
TGGT1_268178	-1.12030337567067	6.05317065289929	-8.19643803228466	3.45746399081547e-06	1.88420185271286e-05	4.2011899685859
TGGT1_270010	0.665217402763067	6.97161497081318	8.24222298160682	3.26833026504339e-06	1.80149299265495e-05	4.19747871784484
TGGT1_290870	-1.21702638541511	6.57858843576129	-8.22334046437961	3.34495281756185e-06	1.83658265895883e-05	4.19568491693201
TGGT1_201180B	1.52813311720818	3.12358227187699	7.7756123707652	5.86213395445997e-06	2.85793695391551e-05	4.19437992533518
TGGT1_236540	0.600391324660637	8.9065539937669	8.29770842850179	3.05386816146179e-06	1.70754923672248e-05	4.18988795235074
TGGT1_215740	0.749900472665211	5.74800505083556	8.1768676234514	3.54185782990488e-06	1.91486598030786e-05	4.18874981736757
TGGT1_257700	0.87941125241897	4.98979859977221	8.07805555307186	4.00305404815151e-06	2.10160337527954e-05	4.18840798818768
TGGT1_292335	2.48602502023419	1.46108168510395	7.61629734082158	7.1970493087367e-06	3.39329266762889e-05	4.18067254780552
TGGT1_244590	2.22545386418512	1.64780032916748	7.6220900423319	7.14319070547661e-06	3.37443036041519e-05	4.17764300073207
TGGT1_218910	2.08658090364823	2.58271237598447	7.68884485520903	6.5527250535219e-06	3.14015178302545e-05	4.17752455929908
TGGT1_252430	-0.674953359349358	6.94947046490862	-8.21764535113394	3.36843911593229e-06	1.84531882003247e-05	4.16619723690601
TGGT1_289170	-0.83680373736532	5.52617660253428	-8.12645119200736	3.76961022336529e-06	2.0064320110964e-05	4.16463191435765
TGGT1_244728	1.46334082165496	4.48151434486059	7.95332858414452	4.67914681872615e-06	2.37981669385438e-05	4.15792600631008
TGGT1_263540	0.72080281454023	5.65885640497122	8.14387942370281	3.68915266952193e-06	1.97511558306713e-05	4.15577297812945
TGGT1_275410	1.06877474492031	5.58978403884728	8.12362486236069	3.78283428552419e-06	2.01057522932978e-05	4.14991497701745
TGGT1_213290	2.46162819461051	0.866612116320815	7.58548909448055	7.49088997274732e-06	3.51144476721215e-05	4.14880677321861
TGGT1_295920	1.97840651532392	2.51357913661732	7.6587830311136	6.81189483530795e-06	3.24097183961136e-05	4.14398612818573
TGGT1_208850	-1.31823635307112	5.24545164923412	-8.05270710976597	4.13146794199109e-06	2.14742302418712e-05	4.14138490840101
TGGT1_251410	1.61067423539287	6.30676568649063	8.15754113180646	3.62737061054136e-06	1.95084438548733e-05	4.13395510145852
TGGT1_306940	1.51222140986108	2.88726561024683	7.69807807452019	6.47525773251182e-06	3.11118892236663e-05	4.13073868493059
TGGT1_295945	2.42858828887497	1.81091146383382	7.59000663169726	7.44701155374622e-06	3.49311684433744e-05	4.12872073221801
TGGT1_244732	2.20530548925115	4.56684102977038	7.91044329196705	4.93907427138112e-06	2.49617944503826e-05	4.12755864430484
TGGT1_273200	-0.701561773189136	6.23368969709403	-8.15933587992949	3.61933704121693e-06	1.94916102411299e-05	4.12430731222726
TGGT1_250800	0.782246059689138	9.11632071347044	8.25294291551616	3.22566958493263e-06	1.78314624256336e-05	4.12072160765314
TGGT1_230160	-1.74418364261412	9.12313562279836	-8.24764868018827	3.24666323087039e-06	1.79339492752841e-05	4.12024619024494
TGGT1_259990	-0.734959636066954	7.27497603639617	-8.19012872503132	3.48443380344168e-06	1.8932522108217e-05	4.1199577515236
TGGT1_218290	2.62006234719073	0.501513586940472	7.56781004490018	7.66528282300541e-06	3.57256931572217e-05	4.11520314330164
TGGT1_211230	-0.671263647097625	5.95978755746533	-8.13482020849744	3.73074234928529e-06	1.98864077961903e-05	4.11485097364145
TGGT1_217830	1.01050449020027	6.93311981591771	8.17692695839874	3.54159864608101e-06	1.91486598030786e-05	4.11395359301752
TGGT1_214140	0.95404886650709	8.01223142403189	8.20388140005093	3.42593395152968e-06	1.86980771604024e-05	4.11251883192874
TGGT1_206440	2.70030376627719	0.539062305580846	7.56077045245486	7.73592875033566e-06	3.6031974064661e-05	4.10752811891657
TGGT1_217220	0.663820866433624	7.61548497891858	8.18045540375222	3.52622237032844e-06	1.91027672960417e-05	4.09767660982614
TGGT1_281450	0.830451663941894	6.64540795440179	8.15611046088098	3.63378820566622e-06	1.95262677992711e-05	4.09656158706931
TGGT1_216620	-0.923001553603451	8.10816396903237	-8.1956534349697	3.46080561805151e-06	1.88461754521017e-05	4.09614738911802
TGGT1_271280	1.05817792573785	4.56706694889369	7.93371452424513	4.79616133272513e-06	2.43067593755585e-05	4.09577824487327
TGGT1_201680	0.670123733607221	9.16563282638494	8.23452538542482	3.29933634128095e-06	1.81562876371093e-05	4.09362953454785
TGGT1_309980	0.606912955766419	8.4821225643274	8.20300412757596	3.42963399286072e-06	1.87043024028553e-05	4.09037769117232
TGGT1_217410	2.13476781825996	2.99431577608488	7.66606409241981	6.7481320416245e-06	3.21644141025551e-05	4.08883024094716
TGGT1_215990	1.40817761191104	7.19209333002239	8.16051238023907	3.6140811948185e-06	1.94916102411299e-05	4.08422628958811
TGGT1_207990	0.78432780160095	6.80391771033958	8.15031117283284	3.65992714547839e-06	1.96234391629905e-05	4.0828454721315
TGGT1_235920	0.623946536165404	8.08568290939519	8.18230620631909	3.51818556287863e-06	1.90875279090698e-05	4.08270027902693
TGGT1_288210	-0.660977027543046	6.12073244502054	-8.10470023908911	3.87267161862112e-06	2.04490492694243e-05	4.06037665240247
TGGT1_200595	1.65037017719623	5.67135231832753	8.04252259351436	4.18429914822966e-06	2.1733374680357e-05	4.06019144751114
TGGT1_259590	2.25978059687373	1.39520199742657	7.52017620257356	8.15714054004788e-06	3.76578541166582e-05	4.05793483679591
TGGT1_207440	-0.641199023719182	10.2564287446057	-8.24212603673513	3.26871881261695e-06	1.80149299265495e-05	4.05547600854168
TGGT1_262710	-0.630677253062832	8.0195427138895	-8.15178798353574	3.65325169312702e-06	1.96020289084965e-05	4.04403461723809
TGGT1_313540	0.823902317677969	8.26448401748962	8.15937180493817	3.61917643017351e-06	1.94916102411299e-05	4.04336378273619
TGGT1_275330	1.02949169145945	5.30888525806002	8.00926766307049	4.36190766537897e-06	2.25277888470597e-05	4.04253921005794
TGGT1_410720	2.34214661153945	1.18709969815109	7.50024755149131	8.37284200287456e-06	3.83922460847035e-05	4.03922266318717
TGGT1_234510	-0.73951117586482	6.05198979834929	-8.07714364122022	4.00759881726327e-06	2.10247897749892e-05	4.03186469008166
TGGT1_277810	2.32085873193571	0.869923230598953	7.48869118476777	8.50071255572454e-06	3.87759620759993e-05	4.02709636273487
TGGT1_272490	1.2000721139731	5.28904742742264	7.9894490781925	4.47158337900265e-06	2.29321623394747e-05	4.0268977507077
TGGT1_306570	3.32772690465864	0.478633959016728	7.49966302988565	8.37926005816941e-06	3.83922460847035e-05	4.0260140469552
TGGT1_410700	1.17452892101138	4.02424570034467	7.78542694478124	5.78906887959589e-06	2.82797562647639e-05	4.02079054848202
TGGT1_304660	0.992610358624419	4.89575907476541	7.93033179555414	4.81665719976392e-06	2.43768218946501e-05	4.01753350772101
TGGT1_306320	1.29104647867945	6.15723632793221	8.06309904887304	4.07829681905283e-06	2.131916534595e-05	4.01298414585287
TGGT1_262935	1.13377795744418	5.61220673610946	8.01656882799696	4.32223268876783e-06	2.23544773457292e-05	4.00747489624947
TGGT1_283540	-1.07967855555653	8.01510472728931	-8.12361153853812	3.78289674374445e-06	2.01057522932978e-05	4.00472502175863
TGGT1_273100	0.927710858393882	5.2092456667121	7.96769030064257	4.59540799779832e-06	2.34683729195738e-05	4.0008946426381
TGGT1_217510	-0.913712161672212	8.73109971451358	-8.14321713036453	3.6921762704769e-06	1.97528727559628e-05	3.99885530849806
TGGT1_299900	-0.896142823095102	5.20672444099509	-7.9569403178154	4.65793515958347e-06	2.37379289722706e-05	3.9983529031908
TGGT1_265090	-0.682622924997655	7.92933131289606	-8.10961985156385	3.84909980545623e-06	2.03392779307839e-05	3.99204467764392
TGGT1_212300	-0.837998247082869	8.96958314008015	-8.14728363025877	3.67365310088412e-06	1.96825930067897e-05	3.99169339360397
TGGT1_273350	-1.31113132450564	5.00718224230964	-7.90425487869429	4.97784153558304e-06	2.51017348181988e-05	3.99057594443743
TGGT1_315480	3.22001856762529	2.73009968373442	7.53300897405625	8.02139413361943e-06	3.71485097138725e-05	3.98976745691173
TGGT1_265780	-0.785841007495768	5.6123103196342	-8.00179563263162	4.40291545532686e-06	2.27235212906276e-05	3.98504673347995
TGGT1_228470	0.582540358747357	10.3805730000223	8.19032579426287	3.48358800602977e-06	1.8932522108217e-05	3.98257258551903
TGGT1_320500	2.46558103598302	1.17881073213598	7.45341328090829	8.90414877713964e-06	4.0316926433294e-05	3.97962866651289
TGGT1_248780	1.34555365118119	3.84280022636125	7.7206500213438	6.28997492815833e-06	3.04418124337623e-05	3.97826743598172
TGGT1_203480	1.06624756399319	6.16249246184517	8.04038592552012	4.19547451375358e-06	2.17759430017835e-05	3.9757125819753
TGGT1_312618	1.03785313542976	5.50700624103773	7.9824362968985	4.51109663391661e-06	2.30700449269857e-05	3.97379986579179
TGGT1_259130	1.67701504368206	3.43375038556614	7.64160549218608	6.96489372556966e-06	3.30087181235169e-05	3.96417109856995
TGGT1_233460	-1.16896440406336	12.6140422646336	-8.22488805379748	3.33860103488966e-06	1.8344734107499e-05	3.94090613606627
TGGT1_291960	-0.612035145862502	9.61800768398829	-8.13299607644066	3.73917732993842e-06	1.99168425125291e-05	3.93892394377825
TGGT1_409600	-1.05679196556992	4.51695181818178	-7.79885282612652	5.69069432217955e-06	2.79111369842202e-05	3.93797847392871
TGGT1_291630	-1.22789149929725	4.21475871942999	-7.7435461150815	6.10781673841528e-06	2.96584217437468e-05	3.93699577711607
TGGT1_276930	-1.24217014230158	6.54651099292627	-8.02325949478779	4.28621460308539e-06	2.2183892577442e-05	3.93481615148851
TGGT1_279390	0.682671429733721	9.26647176130958	8.11725493992451	3.81282107157256e-06	2.02060162371663e-05	3.93445483301469
TGGT1_290610	2.82740698658113	0.707843877009602	7.4134974283662	9.38545386073613e-06	4.21043063735538e-05	3.92839525726018
TGGT1_223760	0.699876987325819	6.85978097785282	8.03229560165422	4.23807984937155e-06	2.19814673805588e-05	3.92481201128169
TGGT1_234590	1.74206613881004	2.873837634678	7.53226246679728	8.02922420040688e-06	3.71612225817438e-05	3.9168289997633
TGGT1_282055	-0.927319343244339	8.56985099715374	-8.06535855316682	4.06683324038573e-06	2.12744576383242e-05	3.90373086852458
TGGT1_201630A	-1.00698728971226	5.36697447622253	-7.89885460855678	5.01193783659425e-06	2.51906751787007e-05	3.89726905981232
TGGT1_233370	1.85937550581335	1.82535297205194	7.41960042327106	9.31009731359898e-06	4.17925007173104e-05	3.89612002349671
TGGT1_216430	0.663800759301303	8.70279422711211	8.05662125755262	4.11135421856766e-06	2.14370060850014e-05	3.88509763680515
TGGT1_277220	0.860620815003444	5.16510577778377	7.86589921395012	5.22550859477946e-06	2.60635104785202e-05	3.87144640626345
TGGT1_258618	2.71850761161577	0.738901806682226	7.36717460620252	9.97913212627451e-06	4.43058916031677e-05	3.8707824263156
TGGT1_254520	-0.781292867713206	5.7098964463765	-7.9255202037063	4.84597231180517e-06	2.45082115257247e-05	3.8697914937322
TGGT1_271250	1.07711615281095	5.06321062597113	7.84290376368692	5.38029564585246e-06	2.67114134374251e-05	3.86809243373564
TGGT1_297170	1.02126399144952	4.05751958610935	7.67767460009272	6.64777255855756e-06	3.17586269322076e-05	3.86435537609874
TGGT1_224310	0.843804688048388	6.2187793475762	7.95842347797689	4.64925443912312e-06	2.37102243134067e-05	3.85765233827214
TGGT1_314100	0.629103768710673	7.61935309029584	7.99809645574931	4.42336987346456e-06	2.27968878951192e-05	3.85653229814388
TGGT1_291050	-0.649998571758136	7.24925198567146	-7.98965938419053	4.47040415958491e-06	2.29321623394747e-05	3.8558859583415
TGGT1_261740	-0.671784125125865	10.9658442477144	-8.11117130033163	3.84169813045118e-06	2.03148552368576e-05	3.85548349206592
TGGT1_265650	-1.01632893445163	3.99220398696765	-7.65214805196902	6.87056136440626e-06	3.26251218005724e-05	3.85264860116617
TGGT1_202900	0.855192599175383	6.71404381444128	7.97251580260505	4.5676334807152e-06	2.33428429909557e-05	3.8510071029403
TGGT1_218920	-0.666103232215487	6.45242035268277	-7.96243565092161	4.62585851401929e-06	2.36073840924951e-05	3.849529276208
TGGT1_294550	-0.8284731784599	7.5890646784397	-7.99242317192017	4.45493808133587e-06	2.29125433690634e-05	3.84904822305692
TGGT1_279420	-0.718846215599559	7.75633822492179	-7.99181221530727	4.45835203486701e-06	2.29125433690634e-05	3.8425792805378
TGGT1_226072	-0.703675175455889	7.54007118710936	-7.9845023358014	4.49941688840435e-06	2.30274359115001e-05	3.84043496468445
TGGT1_289600	-1.12479053889515	7.84012664813037	-7.9906391275824	4.46491497138834e-06	2.29301465993717e-05	3.83580482148892
TGGT1_259090	-0.80365021363647	6.241468670681	-7.93588960708049	4.78303192370677e-06	2.4257041844864e-05	3.82990678495785
TGGT1_278550	0.712703735074117	6.76142844306968	7.95391305287303	4.6757072362784e-06	2.37981669385438e-05	3.82362039176309
TGGT1_230380	-0.685232215953569	8.29617669713646	-7.99222894625779	4.45602308766558e-06	2.29125433690634e-05	3.82015454195592
TGGT1_268750	-0.942893358571339	4.40817185965154	-7.6969069938025	6.48502866594202e-06	3.11383636601211e-05	3.81969285463164
TGGT1_321800	2.15887075790686	1.89932445509632	7.36283176112057	1.00368141177709e-05	4.45349347739345e-05	3.8188986737359
TGGT1_266110	0.929490484095873	5.92368980440813	7.90655141642214	4.96341699425984e-06	2.50674854139951e-05	3.81552202262942
TGGT1_262730	-0.693078289446645	8.34119555980575	-7.98731931343519	4.48354410556314e-06	2.29773775059295e-05	3.81146538444638
TGGT1_235540	0.739766259236697	8.31507381658445	7.98446743621645	4.4996139137414e-06	2.30274359115001e-05	3.80968183545704
TGGT1_268660	-1.98806935299936	1.467469751305	-7.33205798654537	1.0455906390477e-05	4.60442297996192e-05	3.8095299316982
TGGT1_285880	-1.34825335834857	2.90488072632788	-7.45686365804746	8.86380157701608e-06	4.0159120846146e-05	3.80700351060277
TGGT1_224570	-0.722896999593974	5.93868246253248	-7.89977034216117	5.00613849713878e-06	2.5178843865857e-05	3.80623429995732
TGGT1_217040	1.26380838221258	3.1282451825162	7.48975668649931	8.48883588527658e-06	3.87727579060008e-05	3.80329076449539
TGGT1_261050	0.786536296091555	6.95958580358782	7.93772455700992	4.77198559216535e-06	2.42346565028105e-05	3.79566655775042
TGGT1_462965	-0.946761145810833	6.97952704748986	-7.93221928013749	4.80520943418546e-06	2.43357384234424e-05	3.78824783024624
TGGT1_241850	0.902081230748361	8.064648924526	7.95326441532324	4.67952461558394e-06	2.37981669385438e-05	3.77883043309877
TGGT1_231140	0.600831784530947	10.1480247874142	8.02737478657656	4.26422046321623e-06	2.20857003155097e-05	3.77627033112062
TGGT1_239580	3.90223662562464	0.563797369169421	7.29470355534674	1.09899063306982e-05	4.78470453112036e-05	3.771430797956
TGGT1_211890	-0.727198230664652	6.20609646163751	-7.8907013111508	5.06389104218977e-06	2.54027783935983e-05	3.77025793576354
TGGT1_226970	0.553044845986061	10.3982221862121	8.02971905847162	4.25174561493938e-06	2.20367070595581e-05	3.76957885329269
TGGT1_202750	0.81761586864388	5.65726847771473	7.85014255919365	5.33104690429587e-06	2.65209603652786e-05	3.76823302284287
TGGT1_246770	0.669162115693493	6.49609856753549	7.90044420704101	5.0018755027043e-06	2.51747287698093e-05	3.76192847463325
TGGT1_236640	-0.788209229974663	6.27622833944669	-7.88654903872952	5.09057093821853e-06	2.55157012458855e-05	3.76079389485404
TGGT1_264860	0.844567001522982	6.66831778274092	7.90328643650339	4.98393776973268e-06	2.51017348181988e-05	3.76003700907926
TGGT1_204460	3.28244300445566	0.152881217557927	7.29139241988677	1.10386275541954e-05	4.7960933511332e-05	3.7594441573961
TGGT1_259530	-0.741017905576591	6.03541918484158	-7.86877287533092	5.20650318167936e-06	2.59898396528092e-05	3.755534637171
TGGT1_222370	1.39815764419129	3.8590820442495	7.5560099821429	7.78409711686805e-06	3.62101729663092e-05	3.75289870569279
TGGT1_222310	0.645738156209354	6.21075080444364	7.87594563175716	5.15938727733283e-06	2.57898784013326e-05	3.74451985721194
TGGT1_278390	-1.16291628208924	4.04059280600731	-7.5759018391956	7.58492920266931e-06	3.54416001362579e-05	3.74416306344887
TGGT1_265030	-1.10816173960166	3.60889372107464	-7.51039573300742	8.26224889530041e-06	3.79970158601416e-05	3.74297897423387
TGGT1_209160	-0.624846532241358	6.85364138029375	-7.89059598126197	5.06456597146589e-06	2.54027783935983e-05	3.73585508344517
TGGT1_309265	0.922033057485625	5.3859332506984	7.79202757793517	5.74047889643491e-06	2.80987406397497e-05	3.73397344879891
TGGT1_260440	0.653251825221819	8.58014123337877	7.93656895340767	4.77893909366727e-06	2.42531159003614e-05	3.73193876182975
TGGT1_261480	-0.737099800800041	6.5873768176264	-7.87711605732646	5.15174250103652e-06	2.57692910318788e-05	3.72916136294263
TGGT1_230430	0.771389403931117	5.86525310603934	7.83908248850768	5.40648976653729e-06	2.68050388153694e-05	3.7271310904205
TGGT1_244540	-0.71058652192398	6.39534410401939	-7.86546385093381	5.22839441181042e-06	2.60635104785202e-05	3.72327840437479
TGGT1_239810	0.771314989339848	5.49619451889746	7.80019880892918	5.68093116905324e-06	2.79004544917379e-05	3.72210847218591
TGGT1_235620	-0.745488178836231	5.5550360987163	-7.79967913621817	5.68469851371069e-06	2.79004544917379e-05	3.72101407191079
TGGT1_222420	2.2476864636482	1.41449651662188	7.2626210541674	1.1471826307374e-05	4.95192596894799e-05	3.72011766133111
TGGT1_217670	-0.937867085770569	4.93603365571101	-7.70263637673975	6.43737522740215e-06	3.09781515153064e-05	3.71204070780353
TGGT1_254770	0.723047542605842	6.24079483910864	7.84529830696091	5.36395079196236e-06	2.6648370079987e-05	3.70233882463699
TGGT1_202440	0.989768988423393	4.38582024451651	7.61337985769322	7.22433948305769e-06	3.40177016380062e-05	3.70206800538594
TGGT1_277690	0.718588769856193	5.98488553871461	7.82962830686729	5.47188510965292e-06	2.70192813387456e-05	3.70105424533689
TGGT1_234600	1.54987768526825	4.02726717475434	7.53775062430927	7.97184959312762e-06	3.69659116919903e-05	3.69821590191119
TGGT1_205490	-0.595645305879695	8.03047257552757	-7.89154821478318	5.0584677819767e-06	2.54027783935983e-05	3.69763358844979
TGGT1_264890	0.784862552291203	5.84025519082476	7.81383757192021	5.58300722329322e-06	2.74566734776762e-05	3.69598529519785
TGGT1_297220	1.18196254338812	5.35139621173851	7.74930746733178	6.06287509014401e-06	2.94597680576944e-05	3.69328107993369
TGGT1_310010	-0.710496033701295	8.75906954814833	-7.90474742090165	4.97474410253753e-06	2.51017348181988e-05	3.67985074076742
TGGT1_268985	-1.93780324675139	1.5308301485895	-7.23735775109883	1.18671976191505e-05	5.08952348595961e-05	3.67981968440018
TGGT1_363480	1.67463804856623	2.70969088599555	7.33905698764462	1.03589738286081e-05	4.57146825539864e-05	3.67882450439105
TGGT1_253090	0.903933826890241	6.53459905497911	7.83337891442277	5.44584104940718e-06	2.6927067922238e-05	3.67218365132226
TGGT1_219175	-1.18590096018509	4.06259625300634	-7.52170426660202	8.14084840440234e-06	3.76063970539648e-05	3.66596663347912
TGGT1_205570	0.696874532657221	5.29255533821185	7.7278180696871	6.23232944562512e-06	3.02228690037348e-05	3.65586822555425
TGGT1_214210	0.623196538175164	8.68955130181073	7.87718360165703	5.15130169748336e-06	2.57692910318788e-05	3.64591956574207
TGGT1_205370	-0.766263645994035	6.16059573070866	-7.79467947970748	5.72108027824112e-06	2.80343990112777e-05	3.64518848191284
TGGT1_272290	0.883537484495362	6.1703896928785	7.79434843969363	5.72349799190289e-06	2.80343990112777e-05	3.64128050845737
TGGT1_233520	0.682010329813662	7.04178130038594	7.82285954212779	5.51922528916694e-06	2.71979085726447e-05	3.63844674589489
TGGT1_288640	0.771831811763743	7.84706641485	7.8377751046212	5.41548296393581e-06	2.68314233901308e-05	3.63327415442621
TGGT1_234250	-0.71779485533353	7.67452738246863	-7.82661961971666	5.4928737145428e-06	2.71035374459603e-05	3.62377852434316
TGGT1_258130	-0.718809787483112	5.45420581937701	-7.7160549339695	6.32722867616204e-06	3.06018445833171e-05	3.62225264971717
TGGT1_305250	-0.667720788338765	8.2062355090662	-7.84140247263018	5.39057046838661e-06	2.67442559286961e-05	3.62185664285395
TGGT1_221500	0.838097776403389	6.20193376081409	7.78167403737596	5.81689178906087e-06	2.83777337746708e-05	3.62092346477345
TGGT1_256770	0.639980938752538	7.77846407358897	7.82612020483007	5.49636596810524e-06	2.71035374459603e-05	3.62034299003963
TGGT1_297720	0.634794642719644	8.00112464595862	7.82993022703076	5.46978366060943e-06	2.70192813387456e-05	3.61693533864421
TGGT1_207910	-0.912875304141129	5.12949685167871	-7.66237670938682	6.78034353096824e-06	3.2280619234082e-05	3.6166212302348
TGGT1_214540	0.806696673787245	6.13314209573965	7.7708323702165	5.89807586800544e-06	2.87354256289225e-05	3.61059434067871
TGGT1_227870	0.654149781955937	5.93014226039984	7.75962042473166	5.98331007349783e-06	2.91049097888575e-05	3.61014615827707
TGGT1_246540	0.759746169703085	8.43823508772605	7.83714937428846	5.41979288825026e-06	2.68345843003611e-05	3.6054726600607
TGGT1_227090	2.00952102872274	2.01635869767437	7.21321174892744	1.22587149282156e-05	5.22676130078179e-05	3.60376211101973
TGGT1_312905	-0.548490374286008	9.79660726026143	-7.88493524759549	5.10098073988321e-06	2.55503545216357e-05	3.60010842302106
TGGT1_232970	1.13110705260675	4.64242995623226	7.57632287827624	7.58077291630098e-06	3.54416001362579e-05	3.59853519513666
TGGT1_238020	0.850093234823685	5.13870511260982	7.65826555996196	6.81645098699776e-06	3.24102952589328e-05	3.59421475220889
TGGT1_207780	4.12004795290437	0.828028120882275	7.15099429608298	1.33325433547089e-05	5.5964518573356e-05	3.59044674519315
TGGT1_329800	0.896613291300837	5.23419964531209	7.66567375543738	6.75153410417618e-06	3.21644141025551e-05	3.58761448632403
TGGT1_253780	0.685149095286096	6.30370548764997	7.75928738020184	5.98586198859509e-06	2.91049097888575e-05	3.58140180516454
TGGT1_232815	0.740366361477008	5.57054117317535	7.70406925270667	6.42551614046008e-06	3.09542992448795e-05	3.57981851841342
TGGT1_216790	0.624470474084883	7.25402571963994	7.78249479441815	5.81079473824403e-06	2.83669258163576e-05	3.57742354810451
TGGT1_218890	2.44140008574409	0.652983361448304	7.12821446510422	1.37504682975438e-05	5.73891618037978e-05	3.56240963939986
TGGT1_226730	0.630415504149584	8.72412831924383	7.81533315643488	5.57237966270179e-06	2.7422862340084e-05	3.56035923196511
TGGT1_248700	0.603497832128888	9.62805428343596	7.84796326836152	5.34582259748869e-06	2.65763751989438e-05	3.55718034102138
TGGT1_218780	-0.556400024452656	8.97506131794014	-7.82202199188676	5.52511346862069e-06	2.72085776473585e-05	3.55587471920929
TGGT1_233040	4.38974216143907	0.149002921004119	7.12469641249148	1.38162489302172e-05	5.75650782109619e-05	3.55294559698973
TGGT1_281420	1.08047959494759	5.19589103799946	7.62574710063101	7.10941080473286e-06	3.3606451591842e-05	3.54786708806247
TGGT1_293390	0.676550259518808	5.92103439986361	7.71234128303853	6.35750892354605e-06	3.0646883386065e-05	3.54703205835155
TGGT1_273830	0.984344863102896	4.03982632137125	7.44133165760406	9.04698103823658e-06	4.08271991303109e-05	3.54420281821927
TGGT1_307020	-0.848266384332523	5.20465378004157	-7.62145477080918	7.14907613678505e-06	3.37502896690085e-05	3.54257742454253
TGGT1_242080	-0.660949233739488	5.85163254565152	-7.69452762102114	6.50492964575762e-06	3.11929303485543e-05	3.53605102958052
TGGT1_310910	0.86543512999716	6.25027357375454	7.71423157351608	6.34207659713258e-06	3.06331102259385e-05	3.52623307121977
TGGT1_231215	-0.950256942082275	4.77523479177965	-7.53977928262423	7.95075263307232e-06	3.69149302684196e-05	3.52396901495882
TGGT1_227400	1.06967323343625	4.13512950282391	7.43970146659344	9.06644043013733e-06	4.08744889965722e-05	3.52240022914248
TGGT1_240950	1.14553742499791	4.36002164665188	7.47351859820565	8.67177675177204e-06	3.94112838942476e-05	3.52109056031855
TGGT1_208400B	-0.654780579048024	7.08460998723664	-7.72479165783222	6.25659858721119e-06	3.03204393072542e-05	3.50368328706903
TGGT1_231790	-0.67518534663117	6.32969648752687	-7.6989486492603	6.46800428778325e-06	3.10974837731052e-05	3.50075681689817
TGGT1_238390	0.857178856127119	8.57214856283133	7.76251556572608	5.96117539951662e-06	2.90234975480796e-05	3.49698872934782
TGGT1_285150	-0.997527947773865	4.78060131086523	-7.51578975620684	8.20410264967209e-06	3.78030152356896e-05	3.49207954827014
TGGT1_269035	4.11764161001817	-0.200622144143582	7.07718900541159	1.47382213568233e-05	6.03765093845693e-05	3.48775208321151
TGGT1_221970	0.845467454438393	6.32273675763078	7.68492377317391	6.58592274000614e-06	3.15239283854738e-05	3.48109850205275
TGGT1_206700	1.47745984440642	3.74495690122389	7.33865705776754	1.036448669666e-05	4.57146825539864e-05	3.48070327364359
TGGT1_210781	0.962900123191364	7.45666920091359	7.71371408375596	6.34629739201372e-06	3.0633250555374e-05	3.47746051122764
TGGT1_273550	-1.49963022354798	4.82044069458405	-7.48884520112491	8.49899470616035e-06	3.87759620759993e-05	3.47639855223957
TGGT1_216800	-0.876709026732084	5.433084341377	-7.60089002610803	7.34242746069209e-06	3.45292534637952e-05	3.47485991550672
TGGT1_289320	0.611921956708038	7.55394932430777	7.71315142714518	6.35088999287081e-06	3.06351842032342e-05	3.47415722802715
TGGT1_217930	2.21552839394304	1.26340577743939	7.06728552195206	1.49385677208362e-05	6.11014203991741e-05	3.46663228943071
TGGT1_295685	2.37797456269094	1.61999362756206	7.079748807401	1.46869047790767e-05	6.03382293798407e-05	3.46412836044111
TGGT1_316235	0.984602276564226	4.65512475243055	7.48097957553429	8.58720199522313e-06	3.90998580567543e-05	3.45857529731681
TGGT1_316470	1.22480800460791	5.3277261062721	7.57144184697716	7.62910600536848e-06	3.5579774529185e-05	3.45529183593783
TGGT1_268850	0.535498282334703	10.0713668136521	7.78581266041759	5.78621738692696e-06	2.82797562647639e-05	3.45423953660639
TGGT1_230905	1.02510190052884	3.91151201096997	7.35469136972592	1.01458978252251e-05	4.49098857097184e-05	3.45366431572956
TGGT1_319710	0.917634240000986	7.0551356455153	7.68480909467875	6.58689636625868e-06	3.15239283854738e-05	3.45019025290886
TGGT1_298620	-0.928491557942783	4.71405525706482	-7.47462314489184	8.65920005907173e-06	3.93786148299292e-05	3.44666609782199
TGGT1_204000	2.10399777094971	2.75041187276323	7.16477399588544	1.3086339122218e-05	5.51528064043652e-05	3.44557584277532
TGGT1_308970	-0.818727387511224	7.14259629382679	-7.67993195390526	6.62844646950021e-06	3.1702020156484e-05	3.44057333273317
TGGT1_208300	0.846008960170702	5.06575746126368	7.53354539466178	8.01577269599474e-06	3.71460157655863e-05	3.43709140873562
TGGT1_410060	-1.21988180688987	3.55137901442277	-7.27252248780484	1.13207289076973e-05	4.89827630890776e-05	3.43004206120181
TGGT1_205120	1.59379415614572	4.43841634025202	7.40235568523932	9.52471349699467e-06	4.26454576903999e-05	3.42403116383774
TGGT1_311425	0.794471562897193	5.19896645480932	7.54147723850056	7.93314071516543e-06	3.68565749182638e-05	3.42065229582441
TGGT1_243950	0.648871503419854	7.40340354649753	7.6688342753896	6.72404059013446e-06	3.20754071511074e-05	3.41797031405301
TGGT1_223620	-0.921293004424661	4.96274940640847	-7.4913492453239	8.47111742035946e-06	3.87419566228514e-05	3.41526794053392
TGGT1_236930	1.11931178958675	6.37145874511717	7.634246000619	7.03156572479906e-06	3.32692272307378e-05	3.41337236759178
TGGT1_228065	2.51987679926495	0.894389985368971	7.01436400148498	1.60596102066823e-05	6.50214024323736e-05	3.4106236697629
TGGT1_294898	0.652612222080268	6.43744117536682	7.63948033819826	6.98407643033502e-06	3.3078179230647e-05	3.41003952793633
TGGT1_219770	-0.858763988600906	5.95739611901986	-7.60292387742943	7.32305801573606e-06	3.44603399735989e-05	3.40503002639141
TGGT1_314480	0.816723351412156	6.17573501434993	7.61748832546747	7.18594054878305e-06	3.39024231959371e-05	3.39792792561826
TGGT1_278090	1.7542320062504	2.40665919236009	7.10062883407427	1.42753776051605e-05	5.89403726206286e-05	3.39725666120101
TGGT1_222330	0.929527297650495	5.49311086368073	7.55759526397562	7.76802105559313e-06	3.61584062893469e-05	3.39690467632056
TGGT1_202200	-0.805215255512959	9.03896716054166	-7.70244688596765	6.43894528622749e-06	3.09781515153064e-05	3.39069948676028
TGGT1_249910	0.727530476172295	5.09014590717214	7.50589682167375	8.31108321915266e-06	3.81756104120475e-05	3.39054690810184
TGGT1_216390	0.661025863129207	5.85447766465378	7.59261518521533	7.42180022333145e-06	3.48576581183202e-05	3.38944043692061
TGGT1_281650	-0.896927586161324	5.8768868349313	-7.58330641069802	7.51218921453478e-06	3.51917171665514e-05	3.38826011966327
TGGT1_243940	1.38198882087106	3.12839551011317	7.18265649324197	1.27740457134055e-05	5.41175223614884e-05	3.3829915235037
TGGT1_205300	0.748570380871109	6.27139422681823	7.59190181328077	7.42868578540014e-06	3.4867588773092e-05	3.35494640437503
TGGT1_229900	0.670309334352842	6.39244297537629	7.59706110020623	7.37904125362263e-06	3.46791212099512e-05	3.35408312053173
TGGT1_219660	1.76045678553101	4.02872396488896	7.28004488234872	1.12073580248826e-05	4.85785127199538e-05	3.35125315006876
TGGT1_213690	0.928521215461461	4.62059803487864	7.39369558291271	9.63448093164374e-06	4.30371556530883e-05	3.34376461051763
TGGT1_263470	-1.01718966172187	4.31003331136155	-7.33184509840761	1.045886993259e-05	4.60442297996192e-05	3.34164155479921
TGGT1_243910	0.8979905331562	5.78753293383328	7.54452342863757	7.90164885140759e-06	3.67336194695208e-05	3.33661975252369
TGGT1_363590	0.709515917729052	5.55990432084109	7.52354766035495	8.12124054906446e-06	3.75395483444422e-05	3.33201747406531
TGGT1_257610	1.29808334323847	3.25199822198643	7.15975431291936	1.31754596506819e-05	5.54325038153042e-05	3.32528298669187
TGGT1_235970	0.660802749148781	8.706699932775	7.64213879891856	6.96008868710386e-06	3.30073511520798e-05	3.32489576350464
TGGT1_202040	-0.787483010503911	6.49385171412407	-7.57195511200533	7.62400806046586e-06	3.5578704282174e-05	3.3183394967077
TGGT1_231040	0.810090778614543	5.030503754085	7.44254948740555	9.03247309837816e-06	4.07968562440962e-05	3.31699992615739
TGGT1_294270	1.05009750419879	5.12776877594017	7.44850462754139	8.96188722771958e-06	4.05532333499534e-05	3.3144776682821
TGGT1_255215	-0.786195736562714	5.65893810719265	-7.51067943301635	8.25917972202689e-06	3.79970158601416e-05	3.31158687001086
TGGT1_255710	1.8677772935066	2.05231743010696	7.00353716609637	1.6299833888546e-05	6.58480851616884e-05	3.30963207639208
TGGT1_314370	1.11239099517697	3.81931627381611	7.23514914125238	1.19024479686324e-05	5.10164749294811e-05	3.30927804732747
TGGT1_305900	0.893413652677094	4.68579114000228	7.38051406654494	9.80416160152292e-06	4.36350870791288e-05	3.30855658504048
TGGT1_290640	0.759237951332457	8.84649896003189	7.63403153026319	7.03351889319785e-06	3.32692272307378e-05	3.30591198357486
TGGT1_318650	-0.645136789494399	8.5076041353089	-7.61571017729472	7.20253276456191e-06	3.3936885521224e-05	3.2995378798411
TGGT1_288400	0.657086383560564	6.9522794034251	7.57266213393618	7.6169916149373e-06	3.55686739437456e-05	3.29895417668597
TGGT1_220330	-1.0412188890193	3.78652109375199	-7.21514148647583	1.22269232770428e-05	5.21929645494327e-05	3.29466703843933
TGGT1_281555	3.98266652760583	0.657059304707113	6.92530480324291	1.81538448877572e-05	7.21782448404732e-05	3.29415083062596
TGGT1_209680	0.622034588619475	6.17516706472354	7.53800005124042	7.96925246090455e-06	3.69659116919903e-05	3.28500149282005
TGGT1_243240	0.853073287346984	4.62740384101281	7.35292310439384	1.01697602493445e-05	4.49882614420156e-05	3.2820627013672
TGGT1_215680	-1.12426619600183	4.59892144380363	-7.32918547473888	1.04959694005558e-05	4.61563495709328e-05	3.27917261888967
TGGT1_254810	0.75778220674483	5.00919404621027	7.413043806423	9.39108092349381e-06	4.21043063735538e-05	3.27875098049593
TGGT1_208380	1.62670017713257	2.97040532350238	7.08139161835813	1.46540717319049e-05	6.03137433867696e-05	3.2765021175407
TGGT1_241710	1.03080852849704	4.5272473590799	7.32593647141067	1.05414811830286e-05	4.62685552465902e-05	3.27280164269988
TGGT1_244406	2.26572509682096	1.2929803705782	6.91937377598728	1.83032996223689e-05	7.25382395012322e-05	3.26457862793591
TGGT1_244530	-0.954234524352048	8.28323779584667	-7.57952159512736	7.54927625321885e-06	3.53201734049445e-05	3.25871037293845
TGGT1_233410	0.697650910974751	6.14719443594783	7.51616151119146	8.20011137739048e-06	3.78030152356896e-05	3.25790953939091
TGGT1_311410	0.909170640885266	5.80025595654126	7.48826614126334	8.50545528295387e-06	3.87759620759993e-05	3.25710863006493
TGGT1_246630	0.953829832665585	5.41748193284403	7.44655597708169	8.98491929886623e-06	4.06071677403305e-05	3.25500827922058
TGGT1_269310	3.40395541593671	1.84601512458827	6.92572665333108	1.81432644886964e-05	7.21782448404732e-05	3.25461086723548
TGGT1_246485	-0.843117030502439	5.35825424544709	-7.43011230728518	9.1818147672348e-06	4.13181664525566e-05	3.24973838503183
TGGT1_227115	0.96252568607358	4.98235450757293	7.38272816003348	9.77543861848077e-06	4.3560308185279e-05	3.24862610735976
TGGT1_216740A	0.750309020778732	5.41833764848915	7.44680919778224	8.98192278220705e-06	4.06071677403305e-05	3.24859683627098
TGGT1_289180	-0.923194815626328	4.69030130392205	-7.32734253700483	1.05217592902765e-05	4.62375327079619e-05	3.24603942323446
TGGT1_257100	1.01689116526928	4.64714313832605	7.32627634745457	1.05367103625343e-05	4.62685552465902e-05	3.24514378953504
TGGT1_313445	0.817857487181317	5.81951683975271	7.47588389696276	8.64486860221675e-06	3.93379201400996e-05	3.23513195003298
TGGT1_278710	2.80358901302692	1.09073830774766	6.88615568917078	1.91649843548053e-05	7.52593797232227e-05	3.23433716340936
TGGT1_209730	-0.742802606326322	6.08425872873918	-7.49083890896053	8.47679100163374e-06	3.87419566228514e-05	3.23375284683704
TGGT1_358470	2.64387379245529	0.707393060677195	6.87957441231646	1.93407845907956e-05	7.57199050953265e-05	3.23341117201035
TGGT1_257370	-0.7502646604046	6.32860579058719	-7.50242451837269	8.34898509472824e-06	3.83256175077098e-05	3.23125521241037
TGGT1_225140	2.29906945544198	1.61663638438251	6.90422129812577	1.86911169578619e-05	7.37154251095817e-05	3.2215492935366
TGGT1_271460	-0.938932364810478	6.52030673478785	-7.49998007398271	8.37577825685135e-06	3.83922460847035e-05	3.21933079082654
TGGT1_306670	-0.630561220794705	7.58533768621423	-7.52882886511192	8.06534446601017e-06	3.73047704794951e-05	3.21889567144448
TGGT1_209970	-0.817869777469881	6.86698213082778	-7.50995654248891	8.26700262966956e-06	3.79970158601416e-05	3.21565576670752
TGGT1_221530	-0.790615146434607	6.36009447370392	-7.49089023905915	8.47622016384623e-06	3.87419566228514e-05	3.21390314554646
TGGT1_231610	3.53491554401031	0.343854864770981	6.86457570868656	1.97478924480169e-05	7.67646797926105e-05	3.2118799158286
TGGT1_216830	1.10099158381499	4.38004955382762	7.24967085971824	1.16727087382537e-05	5.02380185271839e-05	3.20223224330012
TGGT1_201870	-0.704240288220627	6.08084486836602	-7.46792671452546	8.73574807947943e-06	3.96773442913832e-05	3.2011269091974
TGGT1_246530	0.855249918468228	5.36965859477859	7.40199270012818	9.52928741220895e-06	4.26454576903999e-05	3.19779623178957
TGGT1_239320	-1.04042663427839	4.17001043035361	-7.2029763225957	1.24288224417976e-05	5.28695194439215e-05	3.19255014580489
TGGT1_205070	3.17619452228326	1.82752384369822	6.88175850498224	1.92822527648585e-05	7.56385953867879e-05	3.1907907499363
TGGT1_259830	0.665664153977773	7.32136710709286	7.49895686658416	8.38702076022294e-06	3.84037266389155e-05	3.18557580098431
TGGT1_214980	-0.624015105687466	8.11591272500553	-7.51820828824687	8.1781737342365e-06	3.77311197284093e-05	3.18312079662546
TGGT1_271010	0.762661906792505	4.78164811805732	7.30917397731724	1.07796642785418e-05	4.7087738522166e-05	3.18251184279819
TGGT1_237270	-1.63486606893855	2.35127411603445	-6.93806142410318	1.78367874449057e-05	7.11892988316706e-05	3.18117827298979
TGGT1_244630	0.731277087582456	5.68217365428553	7.42580492154804	9.23415022625209e-06	4.15025644855168e-05	3.17961411553212
TGGT1_229150	1.44771148023354	4.09061964224354	7.17236246912509	1.29528320402371e-05	5.47480026316095e-05	3.17135895512402
TGGT1_245520	0.860534626646121	4.3172735808794	7.21681480066601	1.21994273991618e-05	5.21365002532599e-05	3.16306099377967
TGGT1_276810	1.49319896309623	2.44061481872688	6.9376860965283	1.78460311247428e-05	7.11892988316706e-05	3.15759668741629
TGGT1_226790	0.720476015803103	5.54903866510734	7.39676719592864	9.59539401640428e-06	4.29150180366478e-05	3.15707297517204
TGGT1_290580	-0.696536284167331	6.02333246623994	-7.42888878046652	9.1966484958706e-06	4.13594505894292e-05	3.1517135418982
TGGT1_233230	-0.721833728929776	6.74187858693786	-7.4601855849655	8.82514110239648e-06	4.00087662384079e-05	3.15065602285733
TGGT1_222300	0.936441499182403	5.97661059406515	7.42128286888263	9.28943731043802e-06	4.17253889764481e-05	3.14552383737356
TGGT1_277950	1.26493990938315	3.4974201203785	7.06717012276192	1.49409193012211e-05	6.11014203991741e-05	3.14399663568682
TGGT1_202760	0.728261885035529	5.2819777650416	7.35500500573389	1.01416716165167e-05	4.49098857097184e-05	3.14318161295591
TGGT1_221940	0.678783979146694	6.96733604533743	7.46043869194433	8.82220285414871e-06	4.00087662384079e-05	3.14253522703673
TGGT1_307790	1.09610180695174	3.97185377412965	7.13792850342444	1.35705657340141e-05	5.68330626843411e-05	3.13725270120451
TGGT1_265320	-1.44319951492371	2.99441219785842	-6.98021748663621	1.68303714150018e-05	6.77795460161329e-05	3.13318954897335
TGGT1_294710	0.738827376408778	6.65383617221002	7.44104795583601	9.05036433923148e-06	4.08271991303109e-05	3.12618215986188
TGGT1_315600	0.767168984368894	5.8357324201629	7.39462057116662	9.62269238148652e-06	4.30107864978003e-05	3.118304396463
TGGT1_247980	1.26135346170655	3.17033763100201	6.9999532740525	1.63801951661388e-05	6.6099650068549e-05	3.11400600364258
TGGT1_275440	-0.781258638667982	11.5326708374293	-7.58007652464049	7.54382631965129e-06	3.53172855502957e-05	3.11392619303132
TGGT1_225280	1.21022585068014	3.96038922493451	7.10753652808798	1.41419577216303e-05	5.86016905860448e-05	3.10078823341899
TGGT1_248445	-0.66207245744401	7.20972253826893	-7.43549678388182	9.11683811107514e-06	4.10763581478034e-05	3.09992268388746
TGGT1_219470	1.04141664921271	3.75792755426353	7.07885705850749	1.47047600609601e-05	6.03382293798407e-05	3.09957808655106
TGGT1_238160	3.00273298992744	0.858906597507529	6.77722334809645	2.23079174907951e-05	8.52647808696289e-05	3.09382478304247
TGGT1_219832	0.754741711403574	5.32582399204197	7.32467380684728	1.05592253649403e-05	4.63186188277215e-05	3.09345590382785
TGGT1_294250	0.677049430784051	5.94063876234135	7.38303787874814	9.77142787862912e-06	4.3560308185279e-05	3.0890803082304
TGGT1_220132	1.00802585711032	5.24158871126855	7.30056623858952	1.09042035269622e-05	4.75748772388299e-05	3.08427860919037
TGGT1_278630	1.17527640821237	5.2088663179544	7.28946048099141	1.10671613808314e-05	4.80563371189042e-05	3.08089184554322
TGGT1_223500	0.802238421253274	5.31419688570595	7.31140216669142	1.07476744866016e-05	4.70041921891588e-05	3.07782159477618
TGGT1_223130	0.842684577070636	4.9855364533151	7.26489117453213	1.14369945219612e-05	4.94272950718467e-05	3.07769628639713
TGGT1_318320	-0.851964342607648	5.97260284491522	-7.36097977789812	1.00615206110249e-05	4.45904139632321e-05	3.06618466932736
TGGT1_243690	-0.684283635447906	8.14409393054716	-7.43449633981278	9.12887358252378e-06	4.11052422311052e-05	3.06468261288341
TGGT1_229420	-0.783091225789019	6.34289983269316	-7.38063818071118	9.80254910895366e-06	4.36350870791288e-05	3.06060129879556
TGGT1_203470	1.19651794798138	3.57631747000067	7.01953301678912	1.59462564638201e-05	6.45982495773823e-05	3.0579568631045
TGGT1_229480	-0.588477321317989	9.64980748218538	-7.48357957853488	8.55793700125871e-06	3.89909000032411e-05	3.05614076966752
TGGT1_297940	-0.583552699897801	7.63744563201751	-7.41184126859505	9.40601555774246e-06	4.21454087651636e-05	3.05388254864664
TGGT1_235880	-0.937321410956075	5.15735884872695	-7.25589742345812	1.15756576096161e-05	4.98790718225674e-05	3.04685055906487
TGGT1_314810	0.506826448701203	10.9177088984403	7.51387873187607	8.22465279912549e-06	3.78738265003208e-05	3.04666473178695
TGGT1_256100	0.675869729450883	5.22701246080414	7.27816568416766	1.12355654877493e-05	4.86430761756349e-05	3.04334193904742
TGGT1_262680	1.32660491230286	5.39241603138143	7.27907392257971	1.12219230305913e-05	4.86128118005696e-05	3.0421458807616
TGGT1_262933	-0.751893462344424	6.11511553152829	-7.35139422154935	1.01904406121218e-05	4.505247428517e-05	3.03588322911805
TGGT1_226985	-2.09988947417596	1.43565837626921	-6.75826326774236	2.29090015822093e-05	8.71973872722841e-05	3.0337892617698
TGGT1_291850	-0.628543497342718	9.49391288069387	-7.46210121887142	8.80292902878225e-06	3.99576430697768e-05	3.0336324356747
TGGT1_315580	-0.830590886536692	7.23025954205164	-7.3881911339738	9.70495269732442e-06	4.32990197265243e-05	3.03286029051517
TGGT1_314240	0.678661738488783	7.46257805540495	7.38998923907949	9.68187169411627e-06	4.32224302630432e-05	3.02897837058448
TGGT1_254730	1.09947443655389	5.2660993302091	7.26014234279796	1.15099881249647e-05	4.96253647299364e-05	3.02570745045564
TGGT1_259080	-1.14941671215694	4.58073840377556	-7.13530072730061	1.36189823861695e-05	5.69705342175884e-05	3.01029270589686
TGGT1_309840	2.33984508319486	1.35602627254907	6.73657002316196	2.36179818973462e-05	8.9199075816954e-05	3.00912818224762
TGGT1_310220	-0.78984747042837	7.19590232552029	-7.36878526177782	9.95782945538628e-06	4.42650959002207e-05	3.00663296886322
TGGT1_262480	-1.18876802777894	5.26647556086715	-7.22626431557991	1.20453878876851e-05	5.15384629292756e-05	2.99722012963951
TGGT1_206380	0.67701843000034	7.31735465359223	7.36237090875058	1.00429560791428e-05	4.45351474674611e-05	2.99434674343606
TGGT1_223830	2.10391384205269	0.7544826444048	6.70393914415094	2.47288253395158e-05	9.28188266980902e-05	2.99177675489215
TGGT1_238410	0.885835917410159	6.02451779225416	7.31490870036903	1.06975369941427e-05	4.68129343432306e-05	2.98974927702992
TGGT1_258500	0.65099183052597	6.07092445235479	7.31991190032817	1.06264320421828e-05	4.65540345174128e-05	2.98808323950109
TGGT1_241880	0.713556708529326	7.81819365748221	7.36783740246851	9.97036003197479e-06	4.42938547803476e-05	2.98599532987612
TGGT1_262940	1.15978918959022	3.22975523294799	6.91465049981196	1.84232594086222e-05	7.28950621322206e-05	2.97776310023856
TGGT1_258760	0.793912749633202	5.12678737860478	7.21360756534503	1.22521868195961e-05	5.22676130078179e-05	2.97455487971509
TGGT1_236630	-0.730400128256195	7.21353277768959	-7.34297335833479	1.03051536109144e-05	4.55320813715613e-05	2.96970254934698
TGGT1_220890	-1.14354637947978	7.07402559308451	-7.32911391893274	1.04969694837015e-05	4.61563495709328e-05	2.95540989578532
TGGT1_229170	1.70199376230023	2.12508210698574	6.76106139437155	2.28192181566186e-05	8.69009099992542e-05	2.95525636466819
TGGT1_242820	-0.783598996309739	6.13775106385666	-7.29406252146838	1.09993207611962e-05	4.78470453112036e-05	2.9537586876268
TGGT1_224910	-0.869507715364853	5.02299951747873	-7.1693586437974	1.30055047680196e-05	5.4907122382835e-05	2.94718730620777
TGGT1_314540	0.72842472620943	5.21862266994459	7.20758513345756	1.23519163419284e-05	5.26036157498907e-05	2.94604385222847
TGGT1_229740	0.77881838008221	5.59304772638895	7.25030475712033	1.16627887803329e-05	5.02249030092354e-05	2.94556779605481
TGGT1_313780	-0.719515342786285	7.03521799917887	-7.31951856270917	1.06320037779915e-05	4.65540345174128e-05	2.94229459526679
TGGT1_304900	-0.68416309071238	6.27792064557453	-7.29302314908025	1.10146036411209e-05	4.78850228490848e-05	2.93939313458816
TGGT1_297640	0.757338176521795	5.19134435216025	7.19618155447657	1.25431395290962e-05	5.32937579526949e-05	2.93601946500798
TGGT1_236830	0.71514779103912	5.18438212594028	7.19518131010331	1.25600625462897e-05	5.33346525788988e-05	2.93448272052391
TGGT1_246060	0.738782166534821	5.90549982623917	7.26812175336453	1.13876205731846e-05	4.92430361827416e-05	2.93179960136973
TGGT1_258100	0.614301461020919	5.70171736896203	7.24659564402337	1.17209613876132e-05	5.04160010716172e-05	2.92181438216238
TGGT1_240470	1.68111755061701	4.37083717923097	7.03096310071165	1.56986218776308e-05	6.37364048231812e-05	2.91863743755872
TGGT1_288680	0.565791159424232	7.47033649087832	7.31075819311418	1.07569094844246e-05	4.70164440862289e-05	2.91704514064719
TGGT1_318700	0.594768741694405	6.38454125150594	7.28359345694346	1.11542987725161e-05	4.83772198394942e-05	2.91526100084555
TGGT1_228360	-0.609263636086312	6.7777620312937	-7.29430780410003	1.09957174436657e-05	4.78470453112036e-05	2.91516543055052
TGGT1_231210	-0.771576091802567	7.13693901553049	-7.30265097072592	1.08739005568137e-05	4.74710067318962e-05	2.91508652838146
TGGT1_227840	-0.733280741185142	6.73125190621765	-7.28713119785065	1.11016686426985e-05	4.81775501430168e-05	2.90758948758113
TGGT1_210412	-1.01785671674129	4.02485871768457	-6.98007841839283	1.68335900409526e-05	6.77795460161329e-05	2.90589023893184
TGGT1_203390	-0.697965425436256	7.25060924219668	-7.29745908453009	1.09495356990101e-05	4.77441568546337e-05	2.90419854308093
TGGT1_307650	0.754780869188695	5.83904175109259	7.23928595643425	1.18365138398571e-05	5.08232920926416e-05	2.89822412215529
TGGT1_314310	-0.928360321850787	4.31392783080026	-7.02071239245223	1.59205132347229e-05	6.4529734176015e-05	2.89572413189309
TGGT1_207880	0.861636025990663	5.94643757809178	7.24216994277246	1.17907786984001e-05	5.06864768987695e-05	2.89360638076799
TGGT1_210840	0.633196956879217	7.6470446908792	7.29410185316663	1.09987428750569e-05	4.78470453112036e-05	2.88784637072533
TGGT1_259860	0.80010860634472	6.4388995501058	7.26158978571991	1.14876870911381e-05	4.95584517485463e-05	2.88330407076826
TGGT1_261950	0.663723801787812	8.84767902871362	7.32228565561776	1.05928733232936e-05	4.64383432793221e-05	2.87036313655813
TGGT1_301310	-1.0293392689831	4.38411728395384	-7.00953229334496	1.61663449503229e-05	6.54173028222371e-05	2.86800821520727
TGGT1_222930	-0.798503931836648	6.01084409587606	-7.22318388891705	1.20953733371014e-05	5.17220528657326e-05	2.8652264385041
TGGT1_206490	0.791822887229528	6.22849956485712	7.23834393125667	1.18514938036198e-05	5.08577314837659e-05	2.86285871957117
TGGT1_265150	0.780868996734746	5.41254100403863	7.16983609191303	1.29971173421856e-05	5.49034297899957e-05	2.85925391334319
TGGT1_289530	0.503769142084845	10.6972548498986	7.37154428053241	9.921451314182e-06	4.4130228973854e-05	2.85584713866755
TGGT1_321660	0.880024130069368	4.86566950297901	7.09002671566135	1.44827753822634e-05	5.96955005603953e-05	2.85573538389051
TGGT1_315260	1.24027592821915	2.9990360152788	6.79627588132083	2.17208102433527e-05	8.33258169335548e-05	2.85364406071944
TGGT1_212200	-0.618853465520156	6.20150132022905	-7.22756678004845	1.20243194923981e-05	5.14784574402139e-05	2.85046322790652
TGGT1_252630	0.685358640851825	6.29906438985316	7.2337388137184	1.19250159102639e-05	5.10832451771447e-05	2.85021441588933
TGGT1_301470	2.4189258462447	0.936671058369051	6.60178095225447	2.85816399965325e-05	0.000105067718860493	2.84545962742563
TGGT1_222860	0.612720924708064	9.58841530063066	7.33206170796285	1.04558545938945e-05	4.60442297996192e-05	2.8453648112033
TGGT1_221880	1.01814748603668	3.61317588507523	6.87943877978353	1.93444256722735e-05	7.57199050953265e-05	2.84432941223887
TGGT1_220560	1.91819704699359	1.35376586414223	6.62318525252173	2.77244070171428e-05	0.000102535408138299	2.84422340414465
TGGT1_254090	0.636758372051477	5.83651207503242	7.20214676852244	1.2442719249583e-05	5.28978430924682e-05	2.84293994645973
TGGT1_297450	1.70855876792445	2.31598846871291	6.69972591664858	2.48762651322143e-05	9.32285874801138e-05	2.84191204091064
TGGT1_313025	2.02453952287432	1.40069668044511	6.61443339372441	2.80715582723073e-05	0.000103400679361906	2.82951721975464
TGGT1_273060	-0.772823097693922	5.11704703158109	-7.10138573132536	1.42606930251118e-05	5.89130269234129e-05	2.82611339961543
TGGT1_213300	0.998615456500273	5.92088008269741	7.18661659564246	1.27059704758506e-05	5.38916031558421e-05	2.82086067520473
TGGT1_204010	2.34799206079753	2.70663369985249	6.70963604864315	2.45309443155673e-05	9.2123402393713e-05	2.81662523820283
TGGT1_262670	0.495843994435062	10.5132884982909	7.3386018807022	1.0365247535845e-05	4.57146825539864e-05	2.81652350120738
TGGT1_253520	1.02363523537155	5.29130705833736	7.11668367500373	1.3967328976651e-05	5.8014170871998e-05	2.81285734008294
TGGT1_209270	0.729773670197651	5.80939778072255	7.17401595852066	1.29239350241139e-05	5.46574752061484e-05	2.80789758665594
TGGT1_267650	0.836977822250617	6.69423491807052	7.21519836861138	1.2225987504214e-05	5.21929645494327e-05	2.80619015757959
TGGT1_286500	-0.875926173081937	5.65727454785506	-7.14597293661499	1.34234867664816e-05	5.63139157803946e-05	2.80058152868304
TGGT1_210330	2.27063652011448	0.776469682656683	6.56458536716504	3.01391808827372e-05	0.000109635208507239	2.79887473839925
TGGT1_234530	-0.680954517211785	6.1828803536813	-7.18873767674016	1.26696679792292e-05	5.376883483868e-05	2.79778866610557
TGGT1_273530	-1.06641852358309	3.87807188093971	-6.88000310005772	1.93292811918958e-05	7.57199050953265e-05	2.79561570268815
TGGT1_310310	0.90929526704258	5.41613806573529	7.12183195150272	1.38700569012413e-05	5.77563395067072e-05	2.79410809559563
TGGT1_294400	0.577979813587168	6.64025791840268	7.20541741429137	1.23880250252855e-05	5.27266667937022e-05	2.79248445463785
TGGT1_210810	-0.934843737896786	5.55704239936036	-7.12665935532726	1.37795044368424e-05	5.74464333709409e-05	2.79067297216635
TGGT1_223262	1.05822692256125	3.62926532471251	6.84080369899062	2.04119701294161e-05	7.88428529100281e-05	2.7856707373258
TGGT1_309865	1.51521548824518	2.1764186257981	6.64859258837771	2.67422619053425e-05	9.95073574359689e-05	2.78316462013974
TGGT1_235430	1.17816078904292	3.54894062791804	6.82477874811486	2.08730456481061e-05	8.05386576538329e-05	2.78245622117087
TGGT1_279405	0.875733764013184	4.2129539069699	6.93122198920155	1.80060357618023e-05	7.17492417378689e-05	2.77878461395557
TGGT1_312930	1.41288260450174	3.81052221331821	6.85489645920333	2.00154609140856e-05	7.75572578791823e-05	2.77610198407833
TGGT1_230080	-0.866082259704551	5.83515265464208	-7.14294323523245	1.34786789339986e-05	5.64806110376503e-05	2.7724576352162
TGGT1_213392	0.554702065582622	8.64541294152307	7.23939261105046	1.18348191071362e-05	5.08232920926416e-05	2.76426404988038
TGGT1_223710	0.743735960235595	6.35005424771488	7.17511076628168	1.29048396401278e-05	5.46083196815597e-05	2.76411489093248
TGGT1_232220	0.847334840651619	4.86699338183629	7.02179068307483	1.58970152933642e-05	6.44702484816345e-05	2.75568977186789
TGGT1_204045	1.39576407466574	2.83846467156248	6.70269425628488	2.47722923881213e-05	9.29342468030753e-05	2.7513003328174
TGGT1_225108	0.870583871509617	6.87599204334703	7.17771672261758	1.28595082891917e-05	5.44480223507607e-05	2.74601455738715
TGGT1_251810	-0.708159261725128	9.67551334946171	-7.26338179423834	1.14601412155226e-05	4.94980567393846e-05	2.74493235562449
TGGT1_278740	-1.29362721383727	3.41057484923973	-6.77034330447307	2.25240659594373e-05	8.59412730219051e-05	2.74481509380426
TGGT1_216050	0.712190204443646	5.46383956531922	7.09417785960767	1.4401190322086e-05	5.94262557164337e-05	2.74004283410459
TGGT1_281545	0.812887566940968	5.40218985732308	7.07810682322637	1.47197998006192e-05	6.03660476671859e-05	2.73020584330084
TGGT1_254335	-3.33900454965322	0.753605268864156	-6.50699644751939	3.2731632877258e-05	0.000117659996589769	2.72735367773441
TGGT1_287500	0.672419965022591	7.71344843822397	7.18271011087724	1.27731214142257e-05	5.41175223614884e-05	2.7268257537792
TGGT1_259840	0.742084944510718	5.83141302977612	7.11665634161864	1.39678473564612e-05	5.8014170871998e-05	2.72314851152714
TGGT1_228175	1.84033233359856	2.84674434316694	6.6699255592579	2.59462402982851e-05	9.69402474948198e-05	2.71488364891259
TGGT1_269140	-0.693755050941218	6.127759107045	-7.12663754620197	1.37799121099151e-05	5.74464333709409e-05	2.71352998879857
TGGT1_260280	2.02139061190321	2.10832361318451	6.5852461388715	2.9263169606497e-05	0.000107088254123325	2.71203798628998
TGGT1_411220	1.97380839298943	1.05063247093479	6.51354998784567	3.24249928843872e-05	0.000116917958409575	2.71105643028107
TGGT1_319900	-0.722153003535586	7.45789864324391	-7.16217773096898	1.31323531001032e-05	5.52829703084991e-05	2.70511964109238
TGGT1_267750	0.740747378661323	7.04829233546789	7.15260701798686	1.33034746402713e-05	5.59067237901685e-05	2.70405550201481
TGGT1_295040	0.537916522894981	7.61562495774754	7.16349619490197	1.31089642150612e-05	5.52163172816528e-05	2.70258835297415
TGGT1_356950	1.51842486771846	2.50478872278551	6.62594874852709	2.76157425071601e-05	0.000102237004175444	2.70121576234071
TGGT1_268640	0.700174394315882	5.88501597780021	7.10486303837741	1.41934366870004e-05	5.87347878304635e-05	2.69961002897255
TGGT1_234300	0.62923266065424	6.06095994651461	7.11666839905422	1.39676186837093e-05	5.8014170871998e-05	2.69866400355095
TGGT1_237570	0.606739614472514	6.59511647773925	7.13327230187346	1.36564821874329e-05	5.70543919450573e-05	2.69099668382569
TGGT1_271950	0.808136441815433	5.96896162690463	7.10146418133138	1.42591719376491e-05	5.89130269234129e-05	2.68849400189714
TGGT1_206360	0.726326373005735	5.30530515342389	7.03651687709118	1.55797832679655e-05	6.32890806683112e-05	2.68444352426183
TGGT1_252360	-0.634015001521627	8.34007767606061	-7.16765323838978	1.30355112025425e-05	5.50020299469866e-05	2.67754397514708
TGGT1_298010	-0.648591886127946	7.59905091030114	-7.13744950498051	1.3579377539024e-05	5.68373946478738e-05	2.66528026276548
TGGT1_301250	-0.793407361317463	8.28296755604	-7.15716130075735	1.32217502753156e-05	5.55952537468392e-05	2.66430289427137
TGGT1_207180	0.852802004227679	5.81287982448336	7.07055172421478	1.48721733448115e-05	6.08884273411108e-05	2.66162201177584
TGGT1_287180	0.827426346383096	7.598790022301	7.13383406799456	1.36460857054383e-05	5.70512553405852e-05	2.66032219659412
TGGT1_234470	0.615275367987908	6.4176681443805	7.10346656122541	1.42204058632033e-05	5.88130877466268e-05	2.65615332135074
TGGT1_232580	1.5974939120783	2.49539926972505	6.59197068837225	2.89839325461177e-05	0.000106279266957867	2.65501163212479
TGGT1_270050	0.693352397529462	5.51602470971646	7.03988485961816	1.55081839097771e-05	6.30683405746528e-05	2.65294480652091
TGGT1_237195	-0.912647849717114	5.20648787879124	-6.9882903811081	1.66446516243678e-05	6.70927270109653e-05	2.65135143571036
TGGT1_254440	0.487255710499672	10.2578339668902	7.21236747215931	1.2272651809332e-05	5.22965244446638e-05	2.64693066206885
TGGT1_306290	0.733116786743409	6.78926433924712	7.10589076679435	1.41736237849911e-05	5.8686029813436e-05	2.64528696216358
TGGT1_229300	1.41896331780863	2.74920624607784	6.61776604402779	2.79388225148162e-05	0.000103067599665965	2.64418579641394
TGGT1_235980	-0.642767422234186	5.93801665505031	-7.06409811506871	1.50036655508949e-05	6.12894286450195e-05	2.63989821762821
TGGT1_214320	0.544782483349445	8.97771943133657	7.16600289313938	1.30646192740449e-05	5.50930396161108e-05	2.63981044380384
TGGT1_240490	-0.852204625720335	4.42502751349604	-6.86359980615556	1.97746960700955e-05	7.68280057842946e-05	2.63880782691343
TGGT1_280375	-0.657603722131383	6.20383459934338	-7.07928152430189	1.46962581917669e-05	6.03382293798407e-05	2.63833717004487
TGGT1_312390	-0.903788625904495	5.30767043311736	-6.99068179894134	1.65900570641286e-05	6.69095678943994e-05	2.63571872775637
TGGT1_314820	-0.603163324142445	5.68015053084375	-7.04030908082473	1.54991904032986e-05	6.30668616187672e-05	2.63523764413168
TGGT1_273090	-0.533739130210419	8.72525725283493	-7.15217580647979	1.33112404318377e-05	5.59072098137183e-05	2.63522311793792
TGGT1_286550	-0.91156311406229	4.87708684935486	-6.9223728041063	1.82275643285387e-05	7.23502667042746e-05	2.62410722853817
TGGT1_259168	1.09277079402323	4.59251527757562	6.88136859414742	1.92926881721699e-05	7.56389298080566e-05	2.62352484464992
TGGT1_285950	0.638368829072884	6.06505739765176	7.0609038835492	1.50692066947026e-05	6.1522772360272e-05	2.61800289458445
TGGT1_231460	0.795184141335475	5.23271845851821	6.97762204734673	1.68905492377631e-05	6.78966632725921e-05	2.61433032189728
TGGT1_266890	-0.629047106467151	7.84280497947537	-7.10736598333369	1.41452356587005e-05	5.86016905860448e-05	2.6129017790325
TGGT1_364790	2.08857454444086	1.14598550050705	6.44810376449209	3.56298420253773e-05	0.00012670700025375	2.61237078152346
TGGT1_236140	0.82596925573775	5.26205909794141	6.97880060977568	1.68631946908091e-05	6.78613583702826e-05	2.61202910415097
TGGT1_297845	-0.687720867085024	5.22062221563501	-6.97002706188119	1.70679693969658e-05	6.85721387317352e-05	2.61201323819223
TGGT1_226940	0.767179806268746	5.96620787834632	7.04617551888263	1.5375390927699e-05	6.26328633777171e-05	2.60797737415103
TGGT1_224180	1.74156158422237	2.07518207095792	6.51345930954406	3.24292147914899e-05	0.000116917958409575	2.60591121093989
TGGT1_285870	-0.595524771515809	8.3675572966989	-7.11645498324314	1.39716667672026e-05	5.8014170871998e-05	2.60280313324431
TGGT1_222010	0.644963662284976	5.94970625350125	7.04313490520188	1.54394247011898e-05	6.28586717082425e-05	2.60261075034534
TGGT1_214950	0.573807077405854	8.2833838063658	7.11104703030548	1.40746643738377e-05	5.83755092190727e-05	2.60010100956336
TGGT1_236910	-0.653858533873084	7.0064660588553	-7.07918523112353	1.46981864427697e-05	6.03382293798407e-05	2.59953741592718
TGGT1_261060	0.765558621549874	5.16179196542543	6.95796247998467	1.73539013920896e-05	6.96443225554042e-05	2.59882570317196
TGGT1_295340	-0.595913074732044	6.96568495618082	-7.07715650065839	1.47388742121061e-05	6.03765093845693e-05	2.59789126668841
TGGT1_249410	0.668324769995602	6.49097368777612	7.06523368850389	1.49804385660525e-05	6.12287723941342e-05	2.59782768580121
TGGT1_213635	1.35263153124004	4.3032719184633	6.81019625619905	2.13022775938981e-05	8.19784332049539e-05	2.59632916634721
TGGT1_248590	1.86295106375229	1.94695530016932	6.48753937258368	3.366035712737e-05	0.000120465176242321	2.587827744714
TGGT1_309405	1.51028780263152	1.98598480536874	6.49263804455367	3.34143062511263e-05	0.000119643189653714	2.5821603646447
TGGT1_237230	-1.07345843614374	8.87542228074723	-7.11724982618419	1.39565964932306e-05	5.8014170871998e-05	2.57823678808922
TGGT1_242415	0.91812432479142	6.62059607588891	7.05358956335427	1.52204404092429e-05	6.20708585439435e-05	2.57751647773519
TGGT1_246710	-0.848187708532835	5.38771892945667	-6.96253044526187	1.72450432963311e-05	6.92454815437293e-05	2.57738620178429
TGGT1_249180	-0.686774715627106	8.87140713225859	-7.11139407534769	1.40680304120997e-05	5.83755092190727e-05	2.56867154616408
TGGT1_275470	-0.823957167507089	8.03507771033718	-7.08121854165219	1.4657527128476e-05	6.03137433867696e-05	2.56599948848828
TGGT1_263740	-0.701215112943825	6.72128502243233	-7.04825824659259	1.53316933903524e-05	6.24896906283854e-05	2.56530790531676
TGGT1_207865	2.02743470180069	1.86493518703233	6.46260704273827	3.48916262016183e-05	0.000124445097257895	2.56380392775978
TGGT1_269660	0.64194484351691	7.14591533096758	7.05526802639872	1.51855931700684e-05	6.19633248949526e-05	2.56070796019079
TGGT1_240310B	2.11107858967252	0.689282969096088	6.38946754929678	3.87882623352192e-05	0.000135693930658584	2.55464296973242
TGGT1_226705	0.728832877453918	5.02579317660582	6.90175459318706	1.87550759838623e-05	7.38879219892537e-05	2.54349320562157
TGGT1_313390	-0.53981068558675	10.1172844360738	-7.13295003225551	1.36624501784141e-05	5.70543919450573e-05	2.53878661937622
TGGT1_262520	0.781247506038053	5.00789046508143	6.89287733490826	1.89871929177079e-05	7.46414232612206e-05	2.53563364635537
TGGT1_309000	0.862797970088343	4.93501568144364	6.87773150495851	1.93903203758774e-05	7.58589193291822e-05	2.53161037892834
TGGT1_246070	1.63101281193957	1.55586150967449	6.42016076925192	3.70994121945602e-05	0.000130797734446166	2.52983761966698
TGGT1_228240	1.48296809726162	2.83815901519483	6.54850021595672	3.08405118796385e-05	0.00011179685556369	2.52852365006016
TGGT1_214870	0.762355660118751	4.55464836448072	6.81750734855144	2.10859128200774e-05	8.12741829583994e-05	2.52799766563268
TGGT1_240740	-0.643714979001323	5.55443195703479	-6.95194214025055	1.74984920674369e-05	7.01475480136198e-05	2.52615597622491
TGGT1_285250	-0.507103066075593	8.83825536487086	-7.08013209715577	1.46792373714997e-05	6.03382293798407e-05	2.52483824172475
TGGT1_225150	-0.645372454435073	9.23159007869801	-7.09213697707914	1.4441239580835e-05	5.955788874534e-05	2.52098523750194
TGGT1_232800	0.733878676386097	6.45721431834044	7.00651622148382	1.62333550738729e-05	6.56521078471851e-05	2.51490625310649
TGGT1_235610	0.603735007443884	5.60357249474075	6.95461923193299	1.74340381812915e-05	6.9927525262831e-05	2.51394761464572
TGGT1_289230	1.11034795308703	3.75680105255232	6.67289280149963	2.58375359306984e-05	9.65834846964419e-05	2.51222951849963
TGGT1_209030	-0.484567852021037	11.2839870039636	-7.14449482061809	1.34503834377614e-05	5.63943787510959e-05	2.50864103899282
TGGT1_257170	0.727021311330784	5.64652470858559	6.94940882797164	1.75597185056583e-05	7.02567086614447e-05	2.50320170151285
TGGT1_226320	0.634005403470228	5.44998689378523	6.91863974248301	1.83218874728917e-05	7.25725494048197e-05	2.48554137601271
TGGT1_298070	1.85510568256867	1.95778283481837	6.41862098322048	3.71822451660979e-05	0.000130953179601852	2.4840064233701
TGGT1_290020	0.596237342256785	6.37954433838027	6.97822848430966	1.6876467868075e-05	6.78773952558571e-05	2.47638505693303
TGGT1_218370	-0.758211198633151	5.24006341748569	-6.87684420432433	1.94142185136646e-05	7.59117757612952e-05	2.4750388543778
TGGT1_202490	1.04295416408949	8.62792633697721	7.03672209373989	1.55754105223832e-05	6.32890806683112e-05	2.47337541749241
TGGT1_240255	1.35924800938477	3.61830774378518	6.61849017738971	2.79100696066045e-05	0.000103067599665965	2.46956505122366
TGGT1_234450	0.606394382995288	10.2357927517647	7.08800088276085	1.4522769422557e-05	5.98266059414017e-05	2.46897384860949
TGGT1_249510	0.788640415709413	4.8041909041428	6.80935454120433	2.13273388997971e-05	8.20316803577461e-05	2.45813120527951
TGGT1_214880	-0.662522658146644	7.90782827467705	-7.00019845157393	1.6374684120575e-05	6.6099650068549e-05	2.45482761149566
TGGT1_243340	0.636262833896656	5.46532441340615	6.89488688926731	1.8934381317428e-05	7.44738744175264e-05	2.44824247699223
TGGT1_285260	0.70721793602907	4.80707252434494	6.80208502274396	2.15450951226741e-05	8.26987722699677e-05	2.44445856027258
TGGT1_318580	0.668427978665604	6.24911510505441	6.94952159912597	1.75569881363978e-05	7.02567086614447e-05	2.44291700401799
TGGT1_289000	0.673640949384954	6.29313240251971	6.94922471427135	1.75641771653612e-05	7.02567086614447e-05	2.43982030833127
TGGT1_228340	0.65874077467183	5.35404743154158	6.87392960017065	1.94929404481266e-05	7.60492511683598e-05	2.43682765745435
TGGT1_275568	0.656927237372353	5.70576208867681	6.90104999201044	1.87733883836108e-05	7.39202167604674e-05	2.42319382587493
TGGT1_278230	0.833363060565346	4.4669116366732	6.72828877871011	2.3894767123156e-05	8.99654601422072e-05	2.41923623974314
TGGT1_265290	1.02754419490202	3.9785317844318	6.64270610804921	2.6966462752751e-05	0.000100239526855089	2.4142596528062
TGGT1_318170	-0.62029118459125	6.20261688915716	-6.92532665694736	1.8153296614533e-05	7.21782448404732e-05	2.4136962606376
TGGT1_411090	0.728778014125643	5.06032022977957	6.81809452524523	2.10686378436167e-05	8.12504513779158e-05	2.41291975565366
TGGT1_268780	0.764778446957725	6.99845890475673	6.95006888459242	1.75437439162175e-05	7.02567086614447e-05	2.41219937328026
TGGT1_213072	-0.560616537502581	6.93941108941927	-6.94873988952282	1.75759238890077e-05	7.02652362039762e-05	2.41199657501477
TGGT1_289900	-1.13490884118472	3.36184679497069	-6.53779764078824	3.13167713854699e-05	0.000113410785572356	2.40653273670372
TGGT1_252880B	-0.618146032297779	6.27818850480904	-6.92355754648806	1.81977378918531e-05	7.22766676704685e-05	2.40583483546675
TGGT1_260170	0.690457252590021	5.95552325994883	6.90553735572009	1.86570882182695e-05	7.36209507014654e-05	2.40233607507456
TGGT1_255180	0.606242117266326	7.3400395162435	6.94824841193673	1.75878403597448e-05	7.02744326675861e-05	2.39921307927937
TGGT1_277710	-0.585104284071011	7.15608197541708	-6.94437265350083	1.76821154375731e-05	7.06125134523411e-05	2.39869449234014
TGGT1_201830	1.00468027943214	4.4106956306898	6.70015915512614	2.48610610421659e-05	9.32194120554892e-05	2.39640264641586
TGGT1_272410	0.851592910932122	5.51950526121851	6.86112247582084	1.98429115471719e-05	7.69702747275649e-05	2.39614409602422
TGGT1_312530	0.59179612037495	6.52745729224999	6.92786707783819	1.80896819062608e-05	7.20432672321275e-05	2.39561485438138
TGGT1_232670	-0.662906400771113	9.32053191293925	-7.00443322292037	1.62798075178312e-05	6.58035582634462e-05	2.38916489890795
TGGT1_262170	0.61158751011647	6.12389235928286	6.90685414269017	1.86231067604922e-05	7.35265608890745e-05	2.38849903913983
TGGT1_295950	0.79385102403229	6.72236017959948	6.92493678557393	1.81630804955706e-05	7.21782448404732e-05	2.3850109895813
TGGT1_254920	1.03484573535955	3.72138880139244	6.58115645577694	2.94343938959534e-05	0.000107660936232046	2.38161467061359
TGGT1_247750	2.70678198199552	0.864923967383324	6.26779841357341	4.63321212876454e-05	0.000157632747844559	2.37823533638481
TGGT1_248290	0.804935364840377	6.57121047527528	6.91485339767497	1.84180890879663e-05	7.28950621322206e-05	2.37637682249462
TGGT1_201150	0.64238705775973	7.54950836159779	6.93696374696382	1.78638357543393e-05	7.12214466408682e-05	2.37636305744825
TGGT1_255680	0.825795087820792	5.06114202873658	6.79023854708643	2.1905048099333e-05	8.38126133559818e-05	2.37498864570516
TGGT1_297330	0.775158990147777	5.71434253334792	6.86692048214777	1.96836504237381e-05	7.65964415850257e-05	2.37469490011997
TGGT1_214830	0.712700544933776	5.82385420134165	6.87575914862458	1.94434856038981e-05	7.59124177920281e-05	2.3729591132359
TGGT1_260190	1.64711954138988	5.13304305623799	6.76604084643548	2.26603690573712e-05	8.63860078619033e-05	2.36630554316401
TGGT1_318390	0.961950405091933	7.29762660943135	6.92056604012032	1.82731509146271e-05	7.24580503983151e-05	2.35962790198155
TGGT1_213370	0.582270312213851	6.81754772835372	6.90972626784847	1.85492165795016e-05	7.32744187908097e-05	2.35847759427534
TGGT1_242010	0.585156620505249	6.57401353583183	6.9029536137743	1.87239575454878e-05	7.38051142084275e-05	2.35709522127685
TGGT1_280680	1.61027012866419	2.67894355707013	6.40985503524843	3.76575748697526e-05	0.000132372081360343	2.35497840820149
TGGT1_238010	0.545744966022028	10.7514454788884	7.02222006358102	1.58876686087491e-05	6.44681189298936e-05	2.35312628800897
TGGT1_251885	-1.03621533580034	4.06557931295182	-6.60393641068435	2.84940499432699e-05	0.000104798448407356	2.34560655347207
TGGT1_285810	0.756225884392325	5.93796081645148	6.86194731929278	1.98201709232437e-05	7.69602395341073e-05	2.34142667310364
TGGT1_277510	-0.735824600830011	6.62434717012365	-6.88656662765868	1.91540639828052e-05	7.52569352614732e-05	2.33383537447319
TGGT1_210270	-0.644040837536709	6.30065656409955	-6.87187171662293	1.95487278471251e-05	7.61772384828975e-05	2.32888785267608
TGGT1_263570	-0.544130878842135	7.23649953396706	-6.8981107602551	1.88499842515372e-05	7.41818443243047e-05	2.32852033528856
TGGT1_255870	0.917732690849845	4.28349298502522	6.63336922507703	2.73261978116033e-05	0.000101473502849185	2.32493685808337
TGGT1_236190	0.686118778829046	5.96427132742579	6.85105109655172	2.0122831169533e-05	7.78907045481713e-05	2.3214184688208
TGGT1_270940	-0.686632661594923	5.00549206999523	-6.74045397645474	2.34893471177721e-05	8.88510086628771e-05	2.31860022213303
TGGT1_310177	1.75937935347127	1.41577872499707	6.26382458195822	4.66034138089192e-05	0.000158334610932395	2.31716204296116
TGGT1_227900	0.844903320019628	6.34184930338466	6.86599451072376	1.97089934841974e-05	7.66542439502473e-05	2.31707717529117
TGGT1_299000	1.0247061138146	6.32548393977631	6.86159816721337	1.98297935198035e-05	7.69602395341073e-05	2.31477398878252
TGGT1_294880	0.652436838307519	5.98274025766002	6.84128623871193	2.03982559181986e-05	7.88315464041224e-05	2.30452631225871
TGGT1_235020	-0.605423248623944	7.47813448352177	-6.88379800672144	1.92277664395601e-05	7.54653690334615e-05	2.30035747256559
TGGT1_232955	1.5968853190188	2.7187878754411	6.37781924813026	3.94504423932134e-05	0.000137746695178979	2.29950261740438
TGGT1_224830	0.787856282099174	6.1454856988844	6.84201426591324	2.03775833276448e-05	7.87933222002264e-05	2.29438728483565
TGGT1_223040	0.600571572604688	7.34823101619716	6.87579497134571	1.94425186106332e-05	7.59124177920281e-05	2.29267991084454
TGGT1_202780	0.612629285709762	7.22279203466366	6.87163792316834	1.95550765454181e-05	7.61772384828975e-05	2.29025684321695
TGGT1_357770	0.82861591191961	4.21501047106981	6.59625341796196	2.88075724727304e-05	0.000105685612264415	2.28341639370073
TGGT1_249350	-0.622785731445829	6.8311937208273	-6.85817417668767	1.99244228303617e-05	7.72454546654022e-05	2.28288964949694
TGGT1_293380	0.679912252229576	5.60827344374169	6.7924217099414	2.183823417297e-05	8.36884191589221e-05	2.27670818777977
TGGT1_248310	-1.17871622015341	3.76842777017552	-6.50730596544471	3.27170812944665e-05	0.000117659996589769	2.27389392046946
TGGT1_238995	-0.706946260619333	5.72444126997737	-6.79332049443488	2.18107907772339e-05	8.36271033578307e-05	2.2711119038049
TGGT1_270510	0.680327287915029	9.02118415137037	6.91294797343613	1.84667048954571e-05	7.30274239047623e-05	2.2703140502197
TGGT1_223600	0.638365546432897	5.77703870757845	6.80205364072022	2.15460402848958e-05	8.26987722699677e-05	2.26814047452321
TGGT1_269750	0.913811288166919	4.0133554630552	6.55136986274332	3.07141294096086e-05	0.000111504648646507	2.26640058881617
TGGT1_233390	0.626046035964414	7.16134265167298	6.85279823239786	2.00739716707808e-05	7.77427583307186e-05	2.26434206010598
TGGT1_202290	-0.656696540449934	5.20053763715447	-6.73083400183923	2.38093315617306e-05	8.98289081327452e-05	2.26304258690096
TGGT1_277550	1.07090881899428	5.10870491350948	6.71460430432862	2.43597502646597e-05	9.15275346705054e-05	2.26247919422265
TGGT1_286740	1.36949622066066	3.20188444241527	6.42078527404954	3.70658728739542e-05	0.000130795460629096	2.26237541016525
TGGT1_258230	-1.41758391851611	3.85443232956267	-6.50477072872874	3.28364752896278e-05	0.000117862947650589	2.26136292402402
TGGT1_265510	-0.692534872804603	5.94190568031632	-6.80299493922301	2.15177095197347e-05	8.26987722699677e-05	2.25884326335575
TGGT1_265050	2.84879988202098	0.839042952984552	6.17740806914147	5.2940516499559e-05	0.000176259359716983	2.25032471014363
TGGT1_248380	-1.01705112007495	4.27876336453632	-6.57188166181764	2.9826671664984e-05	0.000108787688587188	2.2476067237606
TGGT1_223490	0.631243650796739	5.62973047487083	6.77545195864557	2.23633565285134e-05	8.54301208626173e-05	2.24741728823848
TGGT1_238190	0.604111904659925	6.15633440029327	6.81267610566312	2.12286246878188e-05	8.17380343617387e-05	2.24720492723963
TGGT1_226850	0.598163300039036	6.73087220223617	6.83079160719473	2.06987527566328e-05	7.99083386928012e-05	2.24511048238093
TGGT1_292035	0.603766331448295	5.51282042926511	6.75487442467595	2.30182438490384e-05	8.75675825344991e-05	2.23339909519463
TGGT1_210490	-0.614581545407869	5.55030641801618	-6.74991200156457	2.31792149722649e-05	8.79836214924333e-05	2.22823531686075
TGGT1_203730	0.594809830924887	6.62550542569932	6.81613964923274	2.11262096837179e-05	8.13865790029575e-05	2.22714875759027
TGGT1_265065	-1.11576041184435	3.28864108158718	-6.40561758195838	3.78896632352199e-05	0.000132995993719014	2.22258606021831
TGGT1_286580	-0.6766476938659	7.93930028360572	-6.84265229722448	2.03594845738309e-05	7.87650149632379e-05	2.22240296258451
TGGT1_245435	0.837667276908307	4.48708008732272	6.59641515517264	2.88009346763128e-05	0.000105685612264415	2.21795118539591
TGGT1_313790	-0.787441709314142	5.81446949432862	-6.76264803993627	2.27684742239223e-05	8.67528725904193e-05	2.21680312795757
TGGT1_242340	0.540508611286884	10.1683478193015	6.91249440717661	1.84782975406331e-05	7.30337471211179e-05	2.2157392972162
TGGT1_220950	-0.852063787052453	8.84407301036056	-6.86711050267401	1.96784540212341e-05	7.65964415850257e-05	2.21446285057536
TGGT1_237140	0.690039090873243	6.26433322465094	6.79062905432325	2.18930809543235e-05	8.38126133559818e-05	2.20842320005344
TGGT1_273885	-0.888384023401611	5.59510495183278	-6.72895163666287	2.38724855317517e-05	8.9942979770783e-05	2.20088661015245
TGGT1_208540	0.645025575691349	6.50338684490132	6.79046657538674	2.18980592954017e-05	8.38126133559818e-05	2.19463257410475
TGGT1_272390	0.795985995649892	5.01340920141823	6.66224582731231	2.6229855068233e-05	9.78997859237216e-05	2.19335367463399
TGGT1_265110	0.720661958316741	5.85786581759108	6.75050017813664	2.3160073162284e-05	8.79697581444757e-05	2.1841834310546
TGGT1_220870	0.829388708353222	5.00167623465487	6.65276622625042	2.65845025211544e-05	9.90211745283366e-05	2.18349657289933
TGGT1_320050	0.476386321397447	11.4245266035904	6.92203537248806	1.82360688655273e-05	7.23502667042746e-05	2.17923703822188
TGGT1_251670	0.585667282336411	6.51054484035392	6.77985772641797	2.22257403878117e-05	8.49951390654777e-05	2.17811148192769
TGGT1_263700	-0.490069325491691	9.86101399874537	-6.87568284720299	1.94455454442634e-05	7.59124177920281e-05	2.17442276685953
TGGT1_240610	0.709294632302883	5.79674223438792	6.73852494317016	2.3553142226152e-05	8.90001878948909e-05	2.17328516729693
TGGT1_286910	1.22973740465537	3.67445884272334	6.43055572076727	3.65453265006046e-05	0.000129395952551559	2.17171210050171
TGGT1_269320	0.765280248549066	6.76314453441474	6.77509469841919	2.23745554640188e-05	8.54301208626173e-05	2.16235085023115
TGGT1_232620	-0.634948295917905	5.2375308582356	-6.66708481788506	2.60507670409772e-05	9.72810452403994e-05	2.15984604340009
TGGT1_316520	0.665749977856153	6.14584953287534	6.74847223185246	2.32261425131073e-05	8.80833676625781e-05	2.15363402293519
TGGT1_203830	0.857755779168373	5.87572221273626	6.72883249186785	2.38764888827749e-05	8.9942979770783e-05	2.15330729379705
TGGT1_268835	0.555462553403929	8.28532180656454	6.80274494708721	2.15252297909476e-05	8.26987722699677e-05	2.14933882591427
TGGT1_215385	0.856398551260812	4.23484252218019	6.50809612611004	3.26799641433557e-05	0.000117589944834881	2.14684233742618
TGGT1_295970	-0.940036482903794	3.73668248889686	-6.42082817175855	3.70635702170849e-05	0.000130795460629096	2.14276009289891
TGGT1_254860	1.27336430220107	3.24821403635173	6.34921587099258	4.11280365542766e-05	0.000142853465370082	2.1419180913532
TGGT1_286720	-0.837610872489326	5.32791793069182	-6.6592656452786	2.63408021446765e-05	9.8213562282294e-05	2.14029486685487
TGGT1_262500	-0.694184238554195	7.30517168637703	-6.77009373610818	2.25319484277463e-05	8.59412730219051e-05	2.13717237182477
TGGT1_237240	0.590602665609735	6.45671292655082	6.74964832190806	2.31878017233753e-05	8.79836214924333e-05	2.13574636178002
TGGT1_410660	2.23342463732437	1.6089020285511	6.1475597354257	5.53370884264411e-05	0.000182574917481007	2.13319429432798
TGGT1_248480	0.566840963584915	10.8457385799932	6.8736168098209	1.95014089613446e-05	7.60492511683598e-05	2.13165075490666
TGGT1_209150	-0.680761617535532	6.49830212250821	-6.74529065058335	2.3330201845348e-05	8.84321136337155e-05	2.13042404778861
TGGT1_234390	0.580926136499634	6.2070005109504	6.73548379963325	2.3654091348407e-05	8.92893076312803e-05	2.12878079394958
TGGT1_320030	-0.620648693804424	6.72025428476611	-6.74341857391615	2.33916636350619e-05	8.85386723198449e-05	2.11699289439735
TGGT1_204550	0.548997064073831	6.04532244275665	6.71517992040319	2.43399983948188e-05	9.15003643360782e-05	2.11030448198595
TGGT1_204160	0.52481684654889	7.29636869481447	6.75146047963881	2.31288570046135e-05	8.78968731095765e-05	2.11027588247154
TGGT1_310090	1.19260686775383	3.42819169490788	6.35291593487874	4.09068180647324e-05	0.000142152651648628	2.1076030526126
TGGT1_227995	1.14305749350648	2.89064794557287	6.27891251557318	4.55822403724921e-05	0.000155806834725057	2.10527686459231
TGGT1_295430	1.97663569567859	1.51688834936544	6.12576255185807	5.71599047760313e-05	0.000187488592505941	2.10445079478073
TGGT1_304720	0.828415705189669	6.57588079905773	6.73000819266832	2.38370157768451e-05	8.98869511337379e-05	2.10313887573526
TGGT1_301450	0.937216233280255	7.3880128918953	6.7400565166583	2.35024764389721e-05	8.88546807118511e-05	2.09012617140872
TGGT1_217951	-0.670916045755779	5.92954337900012	-6.68768947074627	2.5302659471076e-05	9.47779781725388e-05	2.08803459150785
[truncated: 2,867 more rows]
