# Supplementary material for: A serine–arginine-rich (SR) splicing factor modulates alternative splicing of over a thousand genes in Toxoplasma gondii
Source: Oxford University Press journal article supplement (doi:10.1093/nar/gkv311), 2015-04-13
Supplement: gkv311_Supplementary_Data.zip [file gkv311_Supplementary_Data.zip › nar-03398-a-2014-File017.txt]

geneID	exonID	dispersion	pvalue	padjust	meanBase	log2fold(treated/untreated)
TGGT1_230340:E004	TGGT1_230340	E004	0.00316558671577423	2.43276242568671e-134	1.83873049658253e-129	319.945593725762	1.49580692228503
TGGT1_263630:E003	TGGT1_263630	E003	0.00268078537089599	1.25372502581594e-102	4.73795224506103e-98	379.181580317702	1.13894061893703
TGGT1_236210:E002	TGGT1_236210	E002	0.00509825364809749	3.25522575590384e-94	8.20121576942414e-90	197.159479270801	1.82465830246337
TGGT1_206510:E011	TGGT1_206510	E011	0.00710845909953038	6.16399014663724e-93	1.16471675815784e-88	140.911864110899	2.50326533992628
TGGT1_242070:E002	TGGT1_242070	E002	0.00190697181472591	3.61431735620139e-87	5.46354668832827e-83	1892.25624913187	0.729399316919863
TGGT1_315780:E008	TGGT1_315780	E008	0.00636431904100572	1.31288471486244e-82	1.65384087531222e-78	157.55061808068	1.82574176002743
TGGT1_265520:E008	TGGT1_265520	E008	0.00466417433331172	2.66759611302765e-69	2.53974403977176e-65	215.756767623063	1.38361610035984
TGGT1_275750:E003	TGGT1_275750	E003	0.00254637561793067	2.68819987803632e-69	2.53974403977176e-65	399.698341630576	0.852710089321624
TGGT1_271460:E015	TGGT1_271460	E015	0.00797546251522442	2.51365907998249e-60	2.1109708953693e-56	125.472944593321	1.81734368376969
TGGT1_312230:E011	TGGT1_312230	E011	0.0131898877657752	3.05858410900956e-60	2.3117390412716e-56	75.6337777371919	2.97341356740346
TGGT1_300250:E002	TGGT1_300250	E002	0.0095179246929022	3.21522615044093e-56	2.2092111172966e-52	105.005047138805	2.01814449201532
TGGT1_304520:E011	TGGT1_304520	E011	0.00589941024427304	8.5056471192598e-53	5.35728183806578e-49	170.099010969445	1.39006314315113
TGGT1_297180:E005	TGGT1_297180	E005	0.00353702896883653	2.0316318059843e-51	1.18119073199927e-47	285.744234977706	0.963510963557589
TGGT1_219070:E028	TGGT1_219070	E028	0.0134529820413588	4.39297920485922e-50	2.37164395901192e-46	74.1477610781336	2.55211185290283
TGGT1_309600:E012	TGGT1_309600	E012	0.0111954295247925	8.00307192058729e-50	4.03258787934553e-46	170.566893364254	1.63906907264893
TGGT1_315780:E009	TGGT1_315780	E009	0.00935491948352372	2.12868623497299e-48	1.0055647688233e-44	106.846973777461	1.63660815917054
TGGT1_310450:E017	TGGT1_310450	E017	0.00387601107247768	3.22489389698618e-48	1.43378782660006e-44	260.345996552922	0.966108879807359
TGGT1_233710:E012	TGGT1_233710	E012	0.0152775090399078	5.54836773426414e-48	2.32975961161751e-44	65.2563703655397	2.71681295173045
TGGT1_233230:E007	TGGT1_233230	E007	0.00557728000489642	1.43154106064071e-47	5.69467033922875e-44	200.623103057363	1.12927657744778
TGGT1_267620:E027	TGGT1_267620	E027	0.00766584788263454	1.58115441560662e-44	5.97534065201898e-41	204.455372593335	1.25528531389469
TGGT1_265520:E021	TGGT1_265520	E021	0.00693410670004406	1.21126231456652e-43	4.35950610759841e-40	144.487085705195	1.32894645494591
TGGT1_221870:E011	TGGT1_221870	E011	0.00448445362542985	6.0071671921552e-43	2.06378959417034e-39	224.525286711456	0.988919301456357
TGGT1_211420:E006	TGGT1_211420	E006	0.00268926274425003	3.08342930914112e-42	1.01326849584132e-38	2473.63290848249	0.581313684991294
TGGT1_283510:E016	TGGT1_283510	E016	0.0015027506328857	1.42491873161216e-40	4.48742531552958e-37	689.279867864843	0.466705411975268
TGGT1_256970:E005	TGGT1_256970	E005	0.00891103902834517	1.83324618753319e-39	5.54241653384536e-36	112.206737287612	1.42913024605912
TGGT1_229640:E006	TGGT1_229640	E006	0.00754891556033961	3.50079842286703e-39	1.01768210152745e-35	132.62169187599	1.28748235707844
TGGT1_239330:E004	TGGT1_239330	E004	0.0107451340974298	4.54926797203575e-39	1.27349174763854e-35	251.270330138495	1.30442168455393
TGGT1_250010:E015	TGGT1_250010	E015	0.0144079242828811	4.75402521983221e-39	1.28328119344771e-35	69.2119908644899	2.2292084522261
TGGT1_203980:E007	TGGT1_203980	E007	0.004310559317001	5.34425949566022e-39	1.39286145241721e-35	233.715742237146	0.949827927109472
TGGT1_289950:E010	TGGT1_289950	E010	0.0172658432873902	8.76838156473988e-39	2.20910605142057e-35	75.6715438755571	2.20395260672067
TGGT1_262490:E005	TGGT1_262490	E005	0.00682374971284799	1.87952871637049e-38	4.58253353034562e-35	146.845322597268	1.1776446679566
TGGT1_259010:E003	TGGT1_259010	E003	0.00852423102739433	2.25314739785046e-38	5.32179333201041e-35	117.335866159456	1.35277284000323
TGGT1_202160:E009	TGGT1_202160	E009	0.0119380063358511	3.25573242815111e-38	7.45681116316719e-35	83.6067200300004	1.98402372549907
TGGT1_215740:E019	TGGT1_215740	E019	0.0111296994489432	1.56493526903918e-37	3.47885110307409e-34	89.7129181780752	1.72173263300751
TGGT1_309980:E066	TGGT1_309980	E066	0.00799558726367053	1.83981534246971e-37	3.97305494898702e-34	125.154652395187	1.27527986084491
TGGT1_257300:E011	TGGT1_257300	E011	0.00663825718768653	5.6533266670398e-37	1.186915933745e-33	150.98747327478	1.09354514931159
TGGT1_225120:E014	TGGT1_225120	E014	0.00077206039893346	4.31836143789422e-36	8.82136200537625e-33	1398.86048476008	0.323967641220862
TGGT1_233110:E006	TGGT1_233110	E006	0.0144219894847357	7.38884991373749e-36	1.46964224784239e-32	69.1441983876193	1.89801552798275
TGGT1_256830:E012	TGGT1_256830	E012	0.0176051152285378	9.62605745808469e-36	1.86552993537681e-32	56.5980728361757	2.4124028170169
TGGT1_236650:E006	TGGT1_236650	E006	0.000743269109229366	1.27629609553287e-35	2.41162528731414e-32	2178.69807555465	0.294180482474465
TGGT1_201780:E007	TGGT1_201780	E007	0.00590546878787818	1.81043024306918e-35	3.33746191784523e-32	897.037861464889	0.844520929254728
TGGT1_232150:E023	TGGT1_232150	E023	0.0142071797623373	2.32090985381737e-35	4.17664306121962e-32	94.4742595129552	1.70639391503503
TGGT1_228460:E010	TGGT1_228460	E010	0.011926993506949	1.17127499861083e-34	2.05877458011637e-31	83.6843237667048	1.68152963827857
TGGT1_220930:E014	TGGT1_220930	E014	0.0073161500460007	2.69943565557419e-34	4.63701694817291e-31	136.877314627486	1.1754103037216
TGGT1_254370:E023	TGGT1_254370	E023	0.0168255160638082	4.9736173332259e-34	8.35368767288623e-31	59.2302493791689	2.21700414686148
TGGT1_213445:E015	TGGT1_213445	E015	0.00873271730642334	1.42114598936812e-33	2.33506643844394e-30	114.514450960145	1.25342465264583
TGGT1_219700:E007	TGGT1_219700	E007	0.0203098711565532	2.85415591431185e-33	4.58984707054295e-30	62.0791737630888	2.17142018861379
TGGT1_222350:E016	TGGT1_222350	E016	0.00646664346595648	4.97373810835827e-32	7.83177236887364e-29	155.033386896524	1.00537617823559
TGGT1_295910:E009	TGGT1_295910	E009	0.00836339852516568	6.10958568954635e-32	9.42397358341413e-29	119.609223561817	1.1697940035681
TGGT1_278510:E002	TGGT1_278510	E002	0.00157761437908702	2.4489755428127e-31	3.70196938953739e-28	807.750987617565	0.422969712145877
TGGT1_262490:E006	TGGT1_262490	E006	0.00539972072611628	4.57657456086764e-31	6.78248349920584e-28	186.023611386541	0.897345833238056
TGGT1_255260:E002	TGGT1_255260	E002	0.00161377106760824	5.51579491898308e-31	8.01720791474191e-28	639.957059538821	0.46595024383376
TGGT1_214180:E008	TGGT1_214180	E008	0.00765769572514875	8.9184937908601e-31	1.25489852415522e-27	211.208834163217	1.00786962292458
TGGT1_261480:E007	TGGT1_261480	E007	0.00336814236655587	8.96569557624595e-31	1.25489852415522e-27	300.342028966787	0.62192839908289
TGGT1_309400:E006	TGGT1_309400	E006	0.00817680936711789	9.35040233844111e-31	1.2849492900801e-27	122.35957039578	1.33463350694841
TGGT1_220930:E016	TGGT1_220930	E016	0.00754515412497447	1.32042347582617e-30	1.78214727053381e-27	132.688357113214	1.11301889117893
TGGT1_244390:E004	TGGT1_244390	E004	0.00828463824332738	1.5912959441792e-30	2.11005842198162e-27	120.754935044899	1.10914464468782
TGGT1_275802:E015	TGGT1_275802	E015	0.0263144836822536	8.20478440456738e-30	1.06919657735519e-26	37.8212349234471	2.94753874135828
TGGT1_301440:E008	TGGT1_301440	E008	0.00639196493116287	1.48001169822499e-29	1.89597024025833e-26	156.862491643908	0.975638670018872
TGGT1_300310:E007	TGGT1_300310	E007	0.0167803408493453	2.27533473704921e-29	2.86623916826089e-26	59.390300142125	1.82397871080385
TGGT1_222350:E019	TGGT1_222350	E019	0.0164364783095802	3.79751206006683e-29	4.70530420531101e-26	67.0379777290484	1.74595441509885
TGGT1_294360:E015	TGGT1_294360	E015	0.0174030426961963	6.52918566002947e-29	7.95949855736045e-26	57.628131612025	1.73463006505076
TGGT1_213830:E005	TGGT1_213830	E005	0.0181215304743444	8.21398597710772e-29	9.85443631939295e-26	54.9796169981654	1.78393598571711
TGGT1_236070:E006	TGGT1_236070	E006	0.0086663873353955	3.39145904245758e-28	4.00520714604732e-25	184.031546580839	0.896282265742025
TGGT1_213920:E009	TGGT1_213920	E009	0.00746013064582794	3.64523167200148e-28	4.23867538820333e-25	134.213343011137	1.00706416963498
TGGT1_205130:E009	TGGT1_205130	E009	0.00769477704416848	6.28461869174653e-28	7.19703105999373e-25	130.087215465505	1.0082830061203
TGGT1_213800:E009	TGGT1_213800	E009	0.0160792678810285	1.06350594000635e-27	1.19029949055471e-24	177.566700507847	1.30583330711805
TGGT1_294350:E026	TGGT1_294350	E026	0.0264782035290976	1.07089472834431e-27	1.19029949055471e-24	42.6144978711109	2.63802947138555
TGGT1_262490:E002	TGGT1_262490	E002	0.0101988542943027	1.19594222939931e-27	1.30812300437046e-24	194.629152972001	1.05597422538877
TGGT1_278510:E022	TGGT1_278510	E022	0.00166751126029063	1.21151345963235e-27	1.30812300437046e-24	618.532541965855	-0.432941196458652
TGGT1_222410:E011	TGGT1_222410	E011	0.0176869045916705	1.23866841154389e-27	1.31860613917339e-24	58.5173498172964	2.32446244349074
TGGT1_205580:E006	TGGT1_205580	E006	0.0189573318320549	2.62359568207144e-27	2.75411956725449e-24	52.5476561643709	1.8470552635341
TGGT1_242790B:E022	TGGT1_242790B	E022	0.0140077647012796	3.15223896680291e-27	3.26373322724517e-24	71.197997924898	1.40799718757018
TGGT1_244060:E008	TGGT1_244060	E008	0.00518067521542746	3.5253215343965e-27	3.60068719206427e-24	193.984621476522	0.817393221449125
TGGT1_306310:E002	TGGT1_306310	E002	0.0200158605588077	8.36332427082181e-27	8.42822366716338e-24	49.760026693441	2.09293963993653
TGGT1_277840:E006	TGGT1_277840	E006	0.0135403472070055	5.04296934462585e-26	5.0152330132304e-23	73.6671336369703	1.3845409650917
TGGT1_294960:E018	TGGT1_294960	E018	0.00937292267913034	1.42357627197481e-25	1.39736028296624e-22	106.640373011959	1.08196445317058
TGGT1_244840:E011	TGGT1_244840	E011	0.0119949666417186	2.04653863733797e-25	1.98309593958049e-22	83.2076261433503	1.26493462689825
TGGT1_206550:E001	TGGT1_206550	E001	0.00705850776721241	2.68120134537214e-25	2.56519696311287e-22	141.917939156528	-0.778794126931315
TGGT1_275802:E014	TGGT1_275802	E014	0.0420630995624582	3.01565833578196e-25	2.8491186041884e-22	82.4705143482502	2.28701058159383
TGGT1_310100:E019	TGGT1_310100	E019	0.0161634515046847	3.37772283636817e-25	3.15179070886888e-22	61.6657390195975	1.73591806456543
TGGT1_236840:E002	TGGT1_236840	E002	0.0188150852228771	4.23132623288444e-25	3.9001475528521e-22	52.9462484692504	1.76814272350961
TGGT1_267300:E003	TGGT1_267300	E003	0.0123711982621554	5.57474089316257e-25	5.07650682153028e-22	138.573518828015	1.13988869788827
TGGT1_314265:E003	TGGT1_314265	E003	0.0206442497582858	1.13146583814489e-24	1.01807679736508e-21	48.2408010856586	1.60938374732498
TGGT1_239050:E027	TGGT1_239050	E027	0.0114721585676247	1.90248108919664e-24	1.69168618451365e-21	87.020252095487	1.22404071518667
TGGT1_222660:E002	TGGT1_222660	E002	0.0105737835677435	2.04944191397054e-24	1.80117347374095e-21	94.4575116804531	1.16493159843711
TGGT1_250010:E014	TGGT1_250010	E014	0.0207740089406055	3.53525758195603e-24	3.07128550068277e-21	47.9385720750004	1.95434113693443
TGGT1_271145:E001	TGGT1_271145	E001	0.00257215089916507	3.64928189512197e-24	3.13431845678533e-21	520.365464450535	-0.367314230183471
TGGT1_217182:E013	TGGT1_217182	E013	0.00501621846098962	7.33100484701224e-24	6.22575290277393e-21	200.42435591072	0.758583298465994
TGGT1_230150:E002	TGGT1_230150	E002	0.00228190470480396	7.49469730337761e-24	6.29404679537652e-21	447.322762045463	0.404760733194834
TGGT1_308000:E021	TGGT1_308000	E021	0.0121023261513297	8.83794421165069e-24	7.3405439495053e-21	82.4656749909143	1.24299138795342
TGGT1_271880:E015	TGGT1_271880	E015	0.0233839129179389	9.27547828609608e-24	7.62020869369255e-21	42.5738086926003	1.90575246324227
TGGT1_220500:E014	TGGT1_220500	E014	0.010004841679947	1.1328222361837e-23	9.20655594142328e-21	138.81115832291	1.00669965078294
TGGT1_226220:E017	TGGT1_226220	E017	0.0134588377584711	1.78803296923742e-23	1.43769263703088e-20	173.621239402636	1.10606246458209
TGGT1_233260:E023	TGGT1_233260	E023	0.0124143054045108	2.14704202127784e-23	1.70818663212865e-20	80.3828126159776	1.1167510176338
TGGT1_205510:E004	TGGT1_205510	E004	0.0128954536645318	4.19284153500334e-23	3.30107655102732e-20	77.3690581141714	1.26344429359085
TGGT1_263810:E002	TGGT1_263810	E002	0.022802442717636	5.01150648447337e-23	3.8851966292704e-20	43.6624286716559	1.78945088235785
TGGT1_270770:E004	TGGT1_270770	E004	0.0198743978648359	5.03756542124446e-23	3.8851966292704e-20	50.1153236710933	1.70064278620201
TGGT1_310860:E006	TGGT1_310860	E006	0.0288569633941216	5.92490327842246e-23	4.52339433929016e-20	34.4817397827994	2.31670734754059
TGGT1_311240:E004	TGGT1_311240	E004	0.00533422408429773	7.54683685758232e-23	5.70405023369787e-20	188.334696205938	0.731712221049463
TGGT1_311335:E045	TGGT1_311335	E045	0.00303151870692563	8.19564136077384e-23	6.13309866663375e-20	334.391853700638	0.54614052988361
TGGT1_204050:E016	TGGT1_204050	E016	0.00296343312562683	1.04295703813982e-22	7.65327950064891e-20	342.239499907839	0.547024750990759
TGGT1_297180:E010	TGGT1_297180	E010	0.010173663188826	1.03795096953817e-22	7.65327950064891e-20	305.519522890729	0.885778688869621
TGGT1_291880:E021	TGGT1_291880	E021	0.00860395777052772	1.26405890997075e-22	9.09905719365806e-20	116.240671389491	0.953098839173042
TGGT1_294640:E002	TGGT1_294640	E002	0.00832976547785579	1.25648298774831e-22	9.09905719365806e-20	120.095806837888	0.956962792133936
TGGT1_285980A:E012	TGGT1_285980A	E012	0.00622478038333573	1.76640687084061e-22	1.2595147557724e-19	161.118063439059	0.786278982823996
TGGT1_300310:E010	TGGT1_300310	E010	0.0103118672991886	2.1142566951925e-22	1.49345560314055e-19	96.8712621898696	1.07122674154352
TGGT1_315150:E007	TGGT1_315150	E007	0.0121346575574692	2.86379928885669e-22	2.00418220231821e-19	82.2448212211791	1.27812293747774
TGGT1_261022:E105	TGGT1_261022	E105	0.0129687018576384	2.92657289910718e-22	2.02932323725063e-19	76.9299634130798	1.21930662048414
TGGT1_225300:E021	TGGT1_225300	E021	0.00531405091645272	2.95536672569882e-22	2.03065934419789e-19	189.058129076893	0.721965098455275
TGGT1_219630:E008	TGGT1_219630	E008	0.00847103547167722	3.35782364209441e-22	2.28640564429531e-19	118.078157073241	0.945542633128109
TGGT1_215610:E004	TGGT1_215610	E004	0.00987496382609476	3.45533430189827e-22	2.3317953321971e-19	101.184390935255	1.00530391958192
TGGT1_201780:E002	TGGT1_201780	E002	0.00634677327536408	4.3861166896697e-22	2.93372983750987e-19	1260.15381681948	0.661568781793185
TGGT1_272320:E017	TGGT1_272320	E017	0.0184910559340448	4.78910819109311e-22	3.17517873069473e-19	70.1261257482724	1.51422864191222
TGGT1_313910:E003	TGGT1_313910	E003	0.00397562786376466	5.50778104373537e-22	3.61990527693571e-19	253.718730188857	0.626902086824804
TGGT1_209200:E010	TGGT1_209200	E010	0.0302145881601196	6.03554924068797e-22	3.93257657508343e-19	32.9291801691526	2.36403492161419
TGGT1_208530:E014	TGGT1_208530	E014	0.0226925169831753	6.28893190504416e-22	4.06265001065853e-19	43.8745176326027	1.79144262694436
TGGT1_263320:E004	TGGT1_263320	E004	0.00301677028389838	6.35567290215717e-22	4.07097007873596e-19	380.372099288532	0.427368516357269
TGGT1_254555:E006	TGGT1_254555	E006	0.0233102996191729	7.40234584429786e-22	4.7015470891069e-19	42.7086157796527	1.79204278030812
TGGT1_222410:E009	TGGT1_222410	E009	0.022549519314926	7.80888910308279e-22	4.90415435511763e-19	44.1535181889723	2.36647600598403
TGGT1_247420:E004	TGGT1_247420	E004	0.00516322842867606	7.85111107101205e-22	4.90415435511763e-19	194.648106895774	0.684196948679233
TGGT1_253430:E015	TGGT1_253430	E015	0.0018598783216347	1.04738291847456e-21	6.48879473312658e-19	675.959779408542	0.403300756945267
TGGT1_261022:E106	TGGT1_261022	E106	0.0170866405803687	1.32656980319393e-21	8.15160966382146e-19	98.4465248346322	1.26899313382501
TGGT1_266910:E001	TGGT1_266910	E001	0.00503886879803115	1.70193516543395e-21	1.02908530939063e-18	199.512149839697	0.575415637050536
TGGT1_289950:E009	TGGT1_289950	E009	0.0306563125781073	1.69145834247172e-21	1.02908530939063e-18	32.4537403767936	2.42472750372618
TGGT1_264830:E007	TGGT1_264830	E007	0.0403581630047991	2.05174222225805e-21	1.23075222732308e-18	55.0485941023279	2.08501035534567
TGGT1_312110:E012	TGGT1_312110	E012	0.0188979137790372	2.12134215032852e-21	1.26248253863095e-18	52.7134206192769	1.58692440664701
TGGT1_260830:E001	TGGT1_260830	E001	0.00164922549584261	2.51223883219883e-21	1.48343777668166e-18	1354.53000064947	0.117471162133791
TGGT1_262140:E010	TGGT1_262140	E010	0.0069029016226624	2.80558609921002e-21	1.64381246938366e-18	145.146196462104	0.797174143550212
TGGT1_208530:E015	TGGT1_208530	E015	0.0311145109602759	3.01269329338013e-21	1.75157988077121e-18	35.7816357532827	2.20077621460518
TGGT1_261480:E003	TGGT1_261480	E003	0.0267251276301658	3.31203854173727e-21	1.91091982489761e-18	37.2387368182466	1.94215367898846
TGGT1_314970:E002	TGGT1_314970	E002	0.0183083107999339	5.27752618795293e-21	3.02186351771105e-18	54.4168037497592	1.52965900203637
TGGT1_270830:E003	TGGT1_270830	E003	0.00369555955182701	7.89655454012843e-21	4.48749913723299e-18	273.276398331075	0.545597771114952
TGGT1_309400:E024	TGGT1_309400	E024	0.0214126209262606	1.01004344649535e-20	5.69709729649338e-18	46.5046774396411	-1.4429131910011
TGGT1_209120:E002	TGGT1_209120	E002	0.0152001768660363	1.19960048621999e-20	6.71616325551698e-18	65.5897334018356	1.19522184425078
TGGT1_229750:E016	TGGT1_229750	E016	0.0129066431547272	1.5206512835275e-20	8.45101950820408e-18	77.3016573439162	1.16363109315367
TGGT1_235470:E006	TGGT1_235470	E006	0.00532650715298059	1.71317124873015e-20	9.4514532351476e-18	188.610779370874	0.709491724704229
TGGT1_203170:E019	TGGT1_203170	E019	0.007791553030319	2.20106926568975e-20	1.20449116598056e-17	128.458432250823	0.840626847273919
TGGT1_213072:E024	TGGT1_213072	E024	0.0169452171419736	2.21513418633137e-20	1.20449116598056e-17	58.8103033420421	1.34554867275505
TGGT1_243280A:E010	TGGT1_243280A	E010	0.0330196398622998	3.50255355427225e-20	1.89092859099289e-17	30.1265273220731	2.94737087836629
TGGT1_278510:E017	TGGT1_278510	E017	0.00175595234609307	3.57138168434212e-20	1.91441255649607e-17	586.233778044638	-0.372899484212037
TGGT1_207750:E016	TGGT1_207750	E016	0.00842948142724834	5.39971941703824e-20	2.8740957252013e-17	253.870164001358	0.778525323600047
TGGT1_290850:E012	TGGT1_290850	E012	0.0251590154901024	5.46904534272467e-20	2.89063905660011e-17	70.5323346551031	1.55944362272922
TGGT1_306350:E011	TGGT1_306350	E011	0.0303808785212043	5.92492612161597e-20	3.10984559808318e-17	32.7485714142154	1.8788163935723
TGGT1_249390:E036	TGGT1_249390	E036	0.0051140159806051	6.04707455810756e-20	3.15206889138542e-17	196.544306563263	0.674213858630885
TGGT1_260310:E035	TGGT1_260310	E035	0.0290872266184832	9.16655436975756e-20	4.74538707106175e-17	34.208186302083	2.02044156475494
TGGT1_250220:E020	TGGT1_250220	E020	0.000445349811378005	9.79913009729438e-20	5.03835272798438e-17	2686.74896440145	-0.139709739710688
TGGT1_203390:E005	TGGT1_203390	E005	0.0143128134137762	1.04014144221056e-19	5.31188989764582e-17	69.6739251678142	1.21253706892841
TGGT1_310450:E016	TGGT1_310450	E016	0.00589381386068197	1.05055019550671e-19	5.32903925347573e-17	170.262250778362	0.726311695040848
TGGT1_222410:E010	TGGT1_222410	E010	0.0256343409748421	1.0889249652982e-19	5.48687511514459e-17	38.8271699539826	2.43481162752172
TGGT1_246550:E008	TGGT1_246550	E008	0.0143049529536643	1.17141751406014e-19	5.8634489104433e-17	69.7123778454371	-1.22467876674321
TGGT1_295910:E006	TGGT1_295910	E006	0.011247205965702	1.2349649319771e-19	6.14086312425611e-17	88.7704132655266	1.02369334869695
TGGT1_306310:E003	TGGT1_306310	E003	0.0371913637493195	1.39002465986827e-19	6.86672181974924e-17	26.741592291695	3.01288258412621
TGGT1_278510:E006	TGGT1_278510	E006	0.00227128079496649	1.54661242906299e-19	7.59065328658693e-17	449.474099257723	0.425529296467008
TGGT1_250010:E013	TGGT1_250010	E013	0.0310190333353139	1.57104532472657e-19	7.66082243441831e-17	32.0734794625536	2.3383484426111
TGGT1_209250:E005	TGGT1_209250	E005	0.00476851200310868	2.06636726749577e-19	1.0011549411017e-16	210.973422108851	0.6684093429262
TGGT1_223070:E011	TGGT1_223070	E011	0.00497964187395051	3.30480391320175e-19	1.59097891316952e-16	430.345625300451	0.539285979474207
TGGT1_259115:E030	TGGT1_259115	E030	0.00652553674340027	3.62030816565441e-19	1.7318362770664e-16	153.620721833948	0.755900503619415
TGGT1_256970:E014	TGGT1_256970	E014	0.0134985588684927	4.63412405880402e-19	2.20287021768884e-16	123.359750801168	1.03544924180245
TGGT1_312110:E013	TGGT1_312110	E013	0.0246363245744053	4.8381654593321e-19	2.28548888592024e-16	40.4040428272243	1.7517842903221
TGGT1_261022:E104	TGGT1_261022	E104	0.01429392712985	4.91415359473937e-19	2.30696619253162e-16	69.7663867813404	1.17202028535356
TGGT1_410800:E023	TGGT1_410800	E023	0.0104804783152567	6.27885123292538e-19	2.92943292522818e-16	95.3034715434694	0.941742732480528
TGGT1_223140:E006	TGGT1_223140	E006	0.022890570529207	6.97730561367997e-19	3.2353295269519e-16	43.493871441597	1.53757081207998
TGGT1_217020:E011	TGGT1_217020	E011	0.0112201608746662	8.53665613663323e-19	3.93425331779886e-16	130.284661908384	0.903722931584943
TGGT1_217020:E022	TGGT1_217020	E022	0.000625250699819433	8.97806393250302e-19	4.11260623119057e-16	1836.94632307013	-0.180389575004141
TGGT1_321630:E018	TGGT1_321630	E018	0.00670064148264496	9.91037697041637e-19	4.51232597697597e-16	149.568562933037	0.716299659465141
TGGT1_309600:E013	TGGT1_309600	E013	0.0203151609888816	1.00345483430646e-18	4.54150438841623e-16	49.0246649633911	1.45586175511606
TGGT1_312840:E015	TGGT1_312840	E015	0.0345400977076964	1.11678422923529e-18	5.0243324770275e-16	28.7979598249309	2.07607492765272
TGGT1_280710:E006	TGGT1_280710	E006	0.0290231212095598	1.27929949952715e-18	5.72142099250064e-16	34.2839068022428	1.8792775838088
TGGT1_249630:E006	TGGT1_249630	E006	0.00733637306267711	1.43541765483147e-18	6.38186689338073e-16	136.496776430822	0.68670974639186
TGGT1_233110:E012	TGGT1_233110	E012	0.0293461579545902	2.03006514669377e-18	8.97288794838647e-16	33.9057137319918	1.91456415085334
TGGT1_228460:E012	TGGT1_228460	E012	0.0199242321197744	2.34768509630858e-18	1.02853105022322e-15	49.989582799628	1.52493425847772
TGGT1_306410:E013	TGGT1_306410	E013	0.0252066192345597	2.35420962251089e-18	1.02853105022322e-15	39.4876455046175	1.63576552166471
TGGT1_249620:E005	TGGT1_249620	E005	0.0214567788578246	2.49462927876973e-18	1.08361534567801e-15	46.4086924912167	1.3775616016883
TGGT1_277840:E009	TGGT1_277840	E009	0.0171525503509959	2.6256155059405e-18	1.13399583525711e-15	94.7007168694554	1.13586526891775
TGGT1_217020:E042	TGGT1_217020	E042	0.00708065107120972	3.08940601776965e-18	1.32263375499106e-15	141.470181445881	0.746529110966946
TGGT1_243450:E005	TGGT1_243450	E005	0.00576220412969096	3.09737999303298e-18	1.32263375499106e-15	174.193557277446	0.67702263201432
TGGT1_203390:E004	TGGT1_203390	E004	0.0157764316297288	3.70488763516335e-18	1.57316189461189e-15	165.167167646958	1.00735109227956
TGGT1_222360:E017	TGGT1_222360	E017	0.0109090438201397	5.2589088645164e-18	2.2205522335077e-15	91.5379464815516	0.932093592261557
TGGT1_288860:E007	TGGT1_288860	E007	0.0160258334148079	5.88500895743866e-18	2.47111526122849e-15	73.2132072481642	1.22820303715392
TGGT1_272320:E019	TGGT1_272320	E019	0.0276901246497939	6.4031136265854e-18	2.6738128957159e-15	35.9380467426779	1.92563203421484
TGGT1_278510:E019	TGGT1_278510	E019	0.0026353252132952	6.44993614197138e-18	2.67856633781583e-15	385.880887351973	-0.443210104485612
TGGT1_209970:E013	TGGT1_209970	E013	0.0209583601957089	7.32843852112015e-18	3.02676524755903e-15	47.515644249834	1.52883203394465
TGGT1_297520:E015	TGGT1_297520	E015	0.0341815988444843	7.44333870038724e-18	3.05751318289494e-15	29.1005460034154	2.21623136671396
TGGT1_277030:E011	TGGT1_277030	E011	0.0223061306391921	7.9892997455738e-18	3.26403920740518e-15	44.6366388503672	1.55312234244309
TGGT1_250010:E017	TGGT1_250010	E017	0.0389920990565841	8.205909373138e-18	3.33451097978772e-15	55.5972560771239	1.91775926087248
TGGT1_224350A:E002	TGGT1_224350A	E002	0.00859783374904026	9.22287942053303e-18	3.71472775141502e-15	135.887762570256	0.817655342739325
TGGT1_248640:E016	TGGT1_248640	E016	0.0199460396451125	9.2398827401501e-18	3.71472775141502e-15	49.9347567088569	1.37783510503822
TGGT1_256830:E011	TGGT1_256830	E011	0.0383367778003166	1.11864947635993e-17	4.47353252498604e-15	25.9413155226814	2.51711518679755
TGGT1_233838:E002	TGGT1_233838	E002	0.0246661334933924	1.1246417881701e-17	4.47382503334068e-15	40.3550911218503	1.8342996970579
TGGT1_242030:E014	TGGT1_242030	E014	0.0228056178412634	1.26040539762495e-17	4.98764192477954e-15	43.6563331029898	1.53210305469142
TGGT1_310620:E012	TGGT1_310620	E012	0.0150125343689075	1.29251641184137e-17	5.08807163748929e-15	66.4129579984185	1.10159290500973
TGGT1_217020:E003	TGGT1_217020	E003	0.00934733464950996	1.44937357934431e-17	5.64672958113409e-15	119.37571415611	0.833621500581124
TGGT1_239820:E018	TGGT1_239820	E018	0.00161259642849234	1.44402328193125e-17	5.64672958113409e-15	640.441938679314	0.341928354262862
TGGT1_263100:E017	TGGT1_263100	E017	0.0158427570701534	1.95685686073372e-17	7.5847771922039e-15	62.9189237466887	1.17491811528315
TGGT1_214940:E004	TGGT1_214940	E004	0.00716217983866879	1.98945728045661e-17	7.67179388629958e-15	639.590633869027	0.629826531536886
TGGT1_289200:E018	TGGT1_289200	E018	0.0399970143099291	2.97104238647284e-17	1.13988490179893e-14	24.8628379935868	2.48515297288231
TGGT1_217020:E041	TGGT1_217020	E041	0.00771455859429412	3.22338938219273e-17	1.23045563780248e-14	129.750933270632	0.758743530123863
TGGT1_316310:E002	TGGT1_316310	E002	0.00972731423654299	3.39024772304928e-17	1.28764675077141e-14	611.880374590161	0.70689797330408
TGGT1_278510:E003	TGGT1_278510	E003	0.00263179929946242	4.27965517467572e-17	1.6173244870617e-14	386.410394965195	0.430487049356736
TGGT1_278490:E005	TGGT1_278490	E005	0.0181850060655028	5.27043235388505e-17	1.9818398913997e-14	54.7870486899419	1.2246839440807
TGGT1_280560:E015	TGGT1_280560	E015	0.0203967858355709	6.07883951590157e-17	2.27450914995482e-14	48.8278748480838	1.37747164220622
TGGT1_224520:E005	TGGT1_224520	E005	0.00302624998096416	6.36762209350461e-17	2.37082568015402e-14	334.986264572138	0.429643801210729
TGGT1_225560:E013	TGGT1_225560	E013	0.00109128280541435	6.67087864069538e-17	2.47156053637764e-14	964.90114772686	0.259010278880941
TGGT1_306310:E010	TGGT1_306310	E010	0.0517421530062308	6.82734355933637e-17	2.51719161415493e-14	30.5337906739081	2.81149505578967
TGGT1_269990:E003	TGGT1_269990	E003	0.0123349696595558	7.63216734534321e-17	2.80026442862005e-14	80.9024401647155	1.01571002331673
TGGT1_204080:E002	TGGT1_204080	E002	0.016433525157897	7.78786964070328e-17	2.84358822794027e-14	60.6484501075411	1.14323035008469
TGGT1_243690:E002	TGGT1_243690	E002	0.00706885320952574	7.88083660479238e-17	2.86369900126643e-14	141.708392673585	0.701624788249216
TGGT1_231210:E013	TGGT1_231210	E013	0.0139913083958586	7.94687516535233e-17	2.87387903707014e-14	71.2821140263728	1.0775963592547
TGGT1_219070:E021	TGGT1_219070	E021	0.0197324812147477	9.03562465672793e-17	3.24156290919999e-14	50.476895823489	1.34925942504742
TGGT1_267620:E025	TGGT1_267620	E025	0.0303465198214998	9.04937384352356e-17	3.24156290919999e-14	32.785725991852	1.83952114226918
TGGT1_314860:E012	TGGT1_314860	E012	0.01707902089382	9.11907231634135e-17	3.25112133874392e-14	79.1530185998228	1.13772154162878
TGGT1_216970:E016	TGGT1_216970	E016	0.0165918906431036	1.06865166845616e-16	3.79205776550486e-14	60.0673947854854	1.17509956804189
TGGT1_214180:E004	TGGT1_214180	E004	0.00486605966197361	1.08918196508538e-16	3.84684819089173e-14	206.689307767022	0.592813802885582
TGGT1_244000:E012	TGGT1_244000	E012	0.0242732477380352	1.09442699306756e-16	3.84739446465267e-14	41.0099570180299	1.54260498032485
TGGT1_273490:E006	TGGT1_273490	E006	0.0306031131733473	1.32991576438293e-16	4.65359691220328e-14	48.540189408054	1.61092522445798
TGGT1_320300:E007	TGGT1_320300	E007	0.0103133373281662	1.44532745049147e-16	5.03413545451827e-14	96.8573705993329	0.958550063252093
TGGT1_281510:E018	TGGT1_281510	E018	0.0316650762282506	1.57759455482862e-16	5.46962163500262e-14	31.4178146937785	1.82419398548141
TGGT1_278510:E004	TGGT1_278510	E004	0.00336256429166699	1.78425439691951e-16	6.15787743506713e-14	300.849660300129	0.480592136156649
TGGT1_233810:E023	TGGT1_233810	E023	0.0281296010536694	1.883426576184e-16	6.47059761277904e-14	35.3753310985161	1.67767222345669
TGGT1_306310:E014	TGGT1_306310	E014	0.0373008968572169	2.19409555116047e-16	7.50380678496882e-14	26.6629349849547	2.33906963335216
TGGT1_227840:E005	TGGT1_227840	E005	0.0087556609306417	2.22847033198443e-16	7.58703804648861e-14	114.212223898569	0.784890219028704
TGGT1_270370:E006	TGGT1_270370	E006	0.0155993883850779	2.46470835500075e-16	8.35370344787744e-14	63.9044668917331	1.08648829537455
TGGT1_316730:E009	TGGT1_316730	E009	0.0483471673908546	2.77040193751956e-16	9.34788032328585e-14	20.5631804330854	2.72998922346844
TGGT1_213920:E007	TGGT1_213920	E007	0.0100390624510564	2.82287790579546e-16	9.4826114611481e-14	99.5201057882247	0.865142623620243
TGGT1_221330:E013	TGGT1_221330	E013	0.0108657632698927	3.22979687135913e-16	1.08015268642064e-13	91.9046625401154	0.903445951049245
TGGT1_320080:E004	TGGT1_320080	E004	0.0263459058794137	3.76774416029883e-16	1.25450942345245e-13	37.7760194697963	1.57140004954421
TGGT1_278510:E025	TGGT1_278510	E025	0.00229057376694865	4.17920145322286e-16	1.38540528174338e-13	445.582479898916	-0.380888682421472
TGGT1_410760:E005	TGGT1_410760	E005	0.0154659264791986	5.20631627662755e-16	1.71835719135399e-13	64.4581545594823	0.968538644074344
TGGT1_218960:E005	TGGT1_218960	E005	0.0185781845623829	5.62905696818294e-16	1.84980601638784e-13	53.6236659673734	1.26370688655053
TGGT1_262720:E002	TGGT1_262720	E002	0.00468732312310235	5.86577032758482e-16	1.91924957965159e-13	214.676885259823	0.563405019277309
TGGT1_221470:E012	TGGT1_221470	E012	0.0110751256193502	6.26710697270538e-16	2.04172620349577e-13	90.1574876734158	0.893935581508184
TGGT1_248640:E015	TGGT1_248640	E015	0.0209871572697237	6.60776008083348e-16	2.14346661986934e-13	47.4502526506433	1.31606219697231
TGGT1_316730:E012	TGGT1_316730	E012	0.0529363110784277	6.73917619420003e-16	2.17675391072661e-13	18.7784218556874	2.96377403992777
TGGT1_262840:E002	TGGT1_262840	E002	0.0232714125521591	7.36777979696551e-16	2.36966609623084e-13	42.7801743539168	1.48471062189581
TGGT1_226740:E010	TGGT1_226740	E010	0.00796100502848099	7.61319576375019e-16	2.43554533106361e-13	125.702604727551	0.751437093823615
TGGT1_313480:E013	TGGT1_313480	E013	0.0245047483754291	7.63705966317476e-16	2.43554533106361e-13	40.6215416974952	1.51927985722157
TGGT1_297500:E016	TGGT1_297500	E016	0.0119303864980913	7.77662935020715e-16	2.46963529221578e-13	83.6603991376065	0.943529899883567
TGGT1_240280:E015	TGGT1_240280	E015	0.0140855185976807	8.1114324528473e-16	2.5651811198791e-13	70.8032303622642	1.01157010108737
TGGT1_218610:E012	TGGT1_218610	E012	0.0169824523491935	8.69958212680041e-16	2.73971590128262e-13	58.6808830784742	1.23904656898787
TGGT1_203300:E018	TGGT1_203300	E018	0.0830248318150205	8.82536927487894e-16	2.76779693167593e-13	367.1809119404	2.07271297551411
TGGT1_278510:E015	TGGT1_278510	E015	0.00265805472366741	9.41080964342869e-16	2.93920584491581e-13	382.501986190374	-0.413085650631209
TGGT1_209200:E014	TGGT1_209200	E014	0.0148829939596249	9.98405897201422e-16	3.10541212025835e-13	66.9934400719915	1.05723742012191
TGGT1_280400:E010	TGGT1_280400	E010	0.00780523764813452	1.11405439481057e-15	3.45092046182675e-13	128.231399705751	0.711427117212375
TGGT1_315150:E004	TGGT1_315150	E004	0.0141004069917016	1.29575003571206e-15	3.99736241629343e-13	70.7281387203765	1.09995982663957
TGGT1_219510:E008	TGGT1_219510	E008	0.00591062170028797	1.60717689926907e-15	4.93795302441281e-13	169.772926072571	0.580153859100209
TGGT1_219070:E026	TGGT1_219070	E026	0.0428107006771516	1.66583845514347e-15	5.09746567273903e-13	23.2263747330369	2.3427409150333
TGGT1_291310:E002	TGGT1_291310	E002	0.0167595714435194	1.76092441725092e-15	5.36670118163947e-13	63.2536195943786	1.1105941751256
TGGT1_255190:E024	TGGT1_255190	E024	0.00889289870120133	1.81827939533895e-15	5.51924470917705e-13	154.41514748743	0.745085295516768
TGGT1_250010:E016	TGGT1_250010	E016	0.0317741752840263	2.06908778560897e-15	6.25543172047589e-13	31.3097273867839	1.86374945501037
TGGT1_258880:E005	TGGT1_258880	E005	0.00300035026064359	2.20489355285938e-15	6.63945276941105e-13	623.019257514089	0.262815428110757
TGGT1_318440:E012	TGGT1_318440	E012	0.0323701002415183	2.31499826391654e-15	6.9433412215611e-13	30.7322125668988	1.78442016254392
TGGT1_281545:E018	TGGT1_281545	E018	0.0218881091063861	2.47792423157968e-15	7.40262724392313e-13	45.4915466615452	1.37379796600172
TGGT1_208530:E016	TGGT1_208530	E016	0.0454251156114397	2.92774148454674e-15	8.71199042854377e-13	21.8877596914807	2.35401602955797
TGGT1_294870:E004	TGGT1_294870	E004	0.0106040844988615	3.51019070257472e-15	1.04042052424315e-12	94.1860070099795	0.845565590058562
TGGT1_313180:E012	TGGT1_313180	E012	0.00123734637724586	3.93786924033619e-15	1.16262512860582e-12	844.962144190435	0.265596773099002
TGGT1_312050:E009	TGGT1_312050	E009	0.00724259364335764	4.27305455539929e-15	1.25667707940152e-12	138.279509036499	0.654656910818891
TGGT1_235340:E009	TGGT1_235340	E009	0.00906308596108496	4.56438329682626e-15	1.33715200907257e-12	110.311275864621	0.80609914375693
TGGT1_263060:E013	TGGT1_263060	E013	0.00918204063103185	4.84517783547803e-15	1.40849319677346e-12	116.759093543759	0.781147688318828
TGGT1_310970:E021	TGGT1_310970	E021	0.01186830456661	4.83080136770913e-15	1.40849319677346e-12	93.8095931207509	0.895657638203365
TGGT1_244840:E010	TGGT1_244840	E010	0.0197334398295347	5.4282396770521e-15	1.57194333820288e-12	50.4744359844917	1.23205537848443
TGGT1_275480:E014	TGGT1_275480	E014	0.0256784672716433	5.50217993967161e-15	1.5872739091613e-12	58.7407096960299	1.32146624304426
TGGT1_202160:E011	TGGT1_202160	E011	0.0140840472038247	5.6355404159994e-15	1.61956431833485e-12	70.8106601960622	1.04809713412344
TGGT1_265520:E010	TGGT1_265520	E010	0.00495567730027088	5.68781204322282e-15	1.62839473428359e-12	202.904005452248	0.54857379062445
TGGT1_249320:E002	TGGT1_249320	E002	0.0103111744337	6.69798035756875e-15	1.91036509956891e-12	96.8778110641031	0.799958118840828
TGGT1_246340:E018	TGGT1_246340	E018	0.0189650975721516	6.97570277548792e-15	1.9820961172065e-12	82.2421316421263	1.08259543100851
TGGT1_237220:E025	TGGT1_237220	E025	0.0163790214548381	7.83194847306591e-15	2.21705741382497e-12	60.851037375434	-1.09392481491626
TGGT1_216680:E032	TGGT1_216680	E032	0.00377417862442741	7.93922508344608e-15	2.23903921737695e-12	328.05837560481	0.461090383256663
TGGT1_292080:E015	TGGT1_292080	E015	0.0401388874201011	8.5958866608145e-15	2.41522046690588e-12	24.7748223673247	2.02836218419066
TGGT1_306350:E005	TGGT1_306350	E005	0.0131545644808246	8.64117459280133e-15	2.41895280767818e-12	75.8378393305549	0.894921001672119
TGGT1_220500:E013	TGGT1_220500	E013	0.0161211014421737	9.3299715362186e-15	2.60213250424529e-12	61.8283628506243	1.07086553473671
TGGT1_266400:E004	TGGT1_266400	E004	0.0127807408634321	1.02152171407621e-14	2.83855346298928e-12	79.0967234915067	0.938919378917391
TGGT1_319920:E011	TGGT1_319920	E011	0.0110212145382279	1.05009071262457e-14	2.9072511443806e-12	90.6010057298957	0.850491332378597
TGGT1_319950:E010	TGGT1_319950	E010	0.0275881743039842	1.17834878814796e-14	3.25043642721895e-12	68.5304993278619	1.2609195104895
TGGT1_224350B:E003	TGGT1_224350B	E003	0.00791002059238737	1.23503914441454e-14	3.39442649502326e-12	126.519256620674	0.667492602569438
TGGT1_277030:E027	TGGT1_277030	E027	0.0526921508800182	1.2838663807558e-14	3.51584017356103e-12	18.8655385953024	2.83853296039185
TGGT1_220230A:E009	TGGT1_220230A	E009	0.0141771345494142	1.53308612834271e-14	4.18316663366059e-12	70.3436646653015	0.957006850315538
TGGT1_304650:E015	TGGT1_304650	E015	0.0207115437040085	1.71933226477581e-14	4.67448097972248e-12	48.083589037485	1.33649503712846
TGGT1_268260:E006	TGGT1_268260	E006	0.0273406971207203	1.82253001457971e-14	4.93729260078724e-12	36.398401185037	1.56613809297701
TGGT1_222660:E027	TGGT1_222660	E027	0.0376020111161135	1.95489106697826e-14	5.27694916515539e-12	26.4490658770041	1.92934378833161
TGGT1_206550:E002	TGGT1_206550	E002	0.00834169143520152	2.04348707948348e-14	5.49647119008969e-12	119.9228166936	-0.658814641152132
TGGT1_222410:E002	TGGT1_222410	E002	0.00645984067983694	2.07089087070182e-14	5.53081532824682e-12	155.198240061063	0.659476797719787
TGGT1_285268:E016	TGGT1_285268	E016	0.0345931592012856	2.06946353847582e-14	5.53081532824682e-12	28.7537077650915	1.79460242139447
TGGT1_289950:E004	TGGT1_289950	E004	0.02792851475942	2.219530546032e-14	5.9069210468377e-12	35.6306039398282	1.5147696453436
TGGT1_252380:E012	TGGT1_252380	E012	0.013612177998162	2.26591645459387e-14	6.00921043758294e-12	73.2766091857335	0.957159965934796
TGGT1_202360:E011	TGGT1_202360	E011	0.0266983572288159	2.39517500473138e-14	6.3297943079583e-12	37.2761633405181	1.47459317584458
TGGT1_235340:E010	TGGT1_235340	E010	0.011011585897964	2.54912202653519e-14	6.71316170765097e-12	90.6806787328699	0.868193054113867
TGGT1_314970:E012	TGGT1_314970	E012	0.0383381552434764	2.62005448470533e-14	6.87600548829854e-12	25.9403819664247	1.99311014476225
TGGT1_226220:E014	TGGT1_226220	E014	0.017239018247846	2.73699191029203e-14	7.15803884303432e-12	57.8043773781938	1.11711981212756
TGGT1_259010:E005	TGGT1_259010	E005	0.032413733605209	2.86673133389827e-14	7.47149267857583e-12	30.6907631281552	1.68602092136963
TGGT1_271380:E004	TGGT1_271380	E004	0.0456602297296579	2.90886209426145e-14	7.55524449513638e-12	21.7749010921602	2.08764316690479
TGGT1_207900:E002	TGGT1_207900	E002	0.0341320353507626	3.00646448183112e-14	7.76793839923455e-12	29.1428804580145	1.6957002330224
TGGT1_297520:E016	TGGT1_297520	E016	0.0493721746585431	3.01130686006685e-14	7.76793839923455e-12	20.1357326087661	2.57161866907698
TGGT1_224290:E004	TGGT1_224290	E004	0.0223370814041313	3.09257639384633e-14	7.95044588434332e-12	44.5746163985289	1.34652041988551
TGGT1_257180:E010	TGGT1_257180	E010	0.0461161074935246	3.23308540963653e-14	8.28349360783552e-12	21.5593556609019	2.38806198835602
TGGT1_233260:E019	TGGT1_233260	E019	0.038003664135982	3.35968991045866e-14	8.57878658149617e-12	26.1690722504652	1.65050288608233
TGGT1_316230:E023	TGGT1_316230	E023	0.0140095770719723	3.45626642572451e-14	8.79567437673771e-12	71.1887461597347	0.945631022728502
TGGT1_297500:E018	TGGT1_297500	E018	0.0187481818245344	3.53230617483287e-14	8.95901897000732e-12	53.1358182855218	1.15430328910713
TGGT1_270150:E015	TGGT1_270150	E015	0.0156751337750101	3.64480160993046e-14	9.21342459136335e-12	63.594435987959	1.04065867759163
TGGT1_261022:E058	TGGT1_261022	E058	0.064744296233079	3.72231525070716e-14	9.37800104263162e-12	32.6256656919825	2.19014625797062
TGGT1_228330:E019	TGGT1_228330	E019	0.0444819504028604	3.78046129317155e-14	9.49285134420239e-12	22.352503595565	2.17425380083035
TGGT1_310100:E021	TGGT1_310100	E021	0.0442939634036501	4.1390548042042e-14	1.03588755036875e-11	22.4475029097024	2.69848306391758
TGGT1_221900:E003	TGGT1_221900	E003	0.0195340850648878	4.38565379632962e-14	1.09398179945276e-11	50.9911994078797	1.12376330856512
TGGT1_224220:E022	TGGT1_224220	E022	0.0220512745730027	5.20106181655476e-14	1.29311399414093e-11	45.15398472005	1.24501278427188
TGGT1_211850:E005	TGGT1_211850	E005	0.0073250536398944	5.65309497083105e-14	1.40089253798476e-11	484.864870943643	0.527654175086553
TGGT1_291310:E003	TGGT1_291310	E003	0.0186496187652966	6.11408930392591e-14	1.5101800580697e-11	54.4243835883271	1.11862628820962
TGGT1_225220:E041	TGGT1_225220	E041	0.00535885405253231	6.9796904094626e-14	1.71836794960261e-11	187.458908757595	0.552934244579662
TGGT1_314430:E017	TGGT1_314430	E017	0.0190121570915513	7.75357543662168e-14	1.90269720341149e-11	124.411476065088	0.961046639644553
TGGT1_215740:E017	TGGT1_215740	E017	0.0344549801980221	8.20073470900976e-14	1.99301585458642e-11	28.8692310610599	1.89553764592591
TGGT1_226220:E015	TGGT1_226220	E015	0.0156962400918625	8.14862879905284e-14	1.99301585458642e-11	63.508581612871	1.04766163330821
TGGT1_233680:E011	TGGT1_233680	E011	0.0200796385195071	8.19420721962767e-14	1.99301585458642e-11	49.6014846856521	1.11688621696487
TGGT1_278830:E032	TGGT1_278830	E032	0.0183424378830949	8.23106297477182e-14	1.99397500563847e-11	154.89336089263	0.943625861900899
TGGT1_253360:E011	TGGT1_253360	E011	0.0265028948350218	8.27675756593244e-14	1.99863862731088e-11	46.0987792314952	1.30174209592471
TGGT1_408710:E003	TGGT1_408710	E003	0.00369676624612494	8.45261585512935e-14	2.03460385847894e-11	273.185667322068	0.431449818452958
TGGT1_297500:E017	TGGT1_297500	E017	0.0149824119105593	8.71834975935827e-14	2.09190575083116e-11	105.598941751555	0.903351588121039
TGGT1_315780:E011	TGGT1_315780	E011	0.00832173641601093	9.87818049852136e-14	2.36269822290899e-11	120.212552542516	0.687311096742923
TGGT1_263570:E012	TGGT1_263570	E012	0.00907606134859936	9.9426744247135e-14	2.37062213996434e-11	110.15248227086	0.72220497007046
TGGT1_253170:E007	TGGT1_253170	E007	0.0346958403625325	1.02019330999946e-13	2.42478775963456e-11	28.66845913245	1.75379110120359
TGGT1_230690:E008	TGGT1_230690	E008	0.0236738503786563	1.0885848693707e-13	2.57922951714032e-11	42.0510251972656	1.30780294514919
TGGT1_256820:E002	TGGT1_256820	E002	0.0297171904294877	1.22858543010616e-13	2.90184199932137e-11	33.4814966795005	1.49281440741285
TGGT1_295910:E007	TGGT1_295910	E007	0.0158371804705029	1.30012836980149e-13	3.06125552792324e-11	62.9411662663343	1.00295362782823
TGGT1_201790:E004	TGGT1_201790	E004	0.0116065204307403	1.36851623671438e-13	3.21227311190516e-11	104.192133332716	0.789026905834415
TGGT1_257470:E006	TGGT1_257470	E006	0.0443919980291754	1.37516134494549e-13	3.21787754717245e-11	22.3978605392139	2.06972411934886
TGGT1_249530:E005	TGGT1_249530	E005	0.0315502254614407	1.38014008924971e-13	3.21956013042197e-11	33.9332086540699	1.60585185665708
TGGT1_202680:E010	TGGT1_202680	E010	0.00707675634436466	1.53243690201578e-13	3.56383525932789e-11	141.548731473259	0.634829119585513
TGGT1_306220:E016	TGGT1_306220	E016	0.0284536580611378	1.53923551157599e-13	3.56866559619438e-11	34.9715598610035	1.41703081854383
TGGT1_255450:E004	TGGT1_255450	E004	0.00845875250605332	1.60661152574135e-13	3.71348355775482e-11	144.542388584802	0.680418914388958
TGGT1_320450:E005	TGGT1_320450	E005	0.0300273606380841	1.85422538102168e-13	4.27274581549941e-11	33.1349279133527	1.48408290922517
TGGT1_229780:E006	TGGT1_229780	E006	0.0188849150335597	1.93486725818294e-13	4.43207512225862e-11	52.7498240319324	1.08520174943572
TGGT1_253930:E035	TGGT1_253930	E035	0.0328200394894179	1.9350967033756e-13	4.43207512225862e-11	30.310094978574	1.58731228927032
TGGT1_256970:E013	TGGT1_256970	E013	0.0160214650331207	2.14498675080188e-13	4.89795735948966e-11	62.2143696580657	1.00611971816133
TGGT1_271430:E026	TGGT1_271430	E026	0.00694260882158591	2.16241604116276e-13	4.92288341033626e-11	144.30854106348	0.632151625363085
TGGT1_233260:E020	TGGT1_233260	E020	0.0322310351474263	2.45337968996824e-13	5.56850882063602e-11	30.8650674855438	1.42311557808829
TGGT1_203358:E009	TGGT1_203358	E009	0.0105706028285225	2.73530203691414e-13	6.18980833994145e-11	94.4861027857864	0.78494697106468
TGGT1_275802:E018	TGGT1_275802	E018	0.0378310072608171	3.06068596632421e-13	6.90545572258855e-11	66.8071808436047	1.41166449235324
TGGT1_313480:E033	TGGT1_313480	E033	0.0540796114054696	3.27242339511791e-13	7.36119955505362e-11	18.3809684228111	2.73440116086861
TGGT1_217182:E012	TGGT1_217182	E012	0.010115055462849	3.36644613068586e-13	7.55022941986644e-11	127.410703345135	0.742613179269171
TGGT1_226590:E003	TGGT1_226590	E003	0.00499303991476028	3.77914881742847e-13	8.45075816328043e-11	256.816183438157	-0.496347569815002
TGGT1_295760:E036	TGGT1_295760	E036	0.0627277226139266	3.93362590299913e-13	8.7702452212531e-11	15.8443128221425	2.45849703942176
TGGT1_278510:E007	TGGT1_278510	E007	0.00280336014146183	4.12324733099777e-13	9.16597881680805e-11	362.225488017533	0.383389397456225
TGGT1_222440:E002	TGGT1_222440	E002	0.0329729822270097	4.3460457558198e-13	9.63292757526017e-11	30.1692378146868	-1.54490084984603
TGGT1_208420:E005	TGGT1_208420	E005	0.0227447174729561	4.37739896268223e-13	9.67405170752773e-11	43.7735465270055	1.22296772939661
TGGT1_308860:E007	TGGT1_308860	E007	0.00787396830142982	5.05438112017813e-13	1.11376161465103e-10	127.103164460836	0.658779382564953
TGGT1_275750:E006	TGGT1_275750	E006	0.000735441275508216	5.16443962956092e-13	1.13470545372521e-10	1474.95614666485	-0.126302349197498
TGGT1_205130:E010	TGGT1_205130	E010	0.0168508610987717	5.7510351579181e-13	1.25992678059642e-10	59.1408319190483	0.991509964615072
TGGT1_266400:E017	TGGT1_266400	E017	0.0423087888110238	5.86147658735095e-13	1.28041076134439e-10	23.5023168639381	1.98452380770797
TGGT1_228630:E002	TGGT1_228630	E002	0.0113443321316403	6.02954404110583e-13	1.31332852367395e-10	88.0061971590351	0.768014153315563
TGGT1_311470:E043	TGGT1_311470	E043	0.0305634776662662	6.40713479231716e-13	1.39156339618654e-10	62.6709500928784	1.26609799942823
TGGT1_208050:E012	TGGT1_208050	E012	0.0649534823172524	6.54059176055169e-13	1.41647852849862e-10	15.3008550197271	3.23988287819894
TGGT1_230410:E005	TGGT1_230410	E005	0.00941481968783121	6.74127763373859e-13	1.45480910725922e-10	195.460285014259	0.647672124681684
TGGT1_294350:E010	TGGT1_294350	E010	0.0639922018044505	6.75607944547625e-13	1.45480910725922e-10	15.5309258873205	3.2135328077181
TGGT1_311335:E038	TGGT1_311335	E038	0.00459611469771887	7.02554673096917e-13	1.50853657107986e-10	222.94205076078	0.495779992033673
TGGT1_262150:E007	TGGT1_262150	E007	0.0177464965939372	7.51318894114667e-13	1.60867378625991e-10	56.1455840056087	1.04586828749157
TGGT1_295910:E008	TGGT1_295910	E008	0.0170133443966194	9.25099424181747e-13	1.97516566888432e-10	58.5739415891461	1.00262951942348
TGGT1_263060:E014	TGGT1_263060	E014	0.020180988153642	1.05602098314691e-12	2.24834304079465e-10	49.3516132227268	1.12974314176229
TGGT1_295760:E039	TGGT1_295760	E039	0.0132700687455225	1.06149172295925e-12	2.25364234282882e-10	75.1746253269731	0.82708388019128
TGGT1_253170:E008	TGGT1_253170	E008	0.0346117424925846	1.11974660402462e-12	2.3706635245207e-10	28.7382418675313	1.63961512855489
TGGT1_220212:E006	TGGT1_220212	E006	0.0498586956611608	1.17235321688736e-12	2.47510616868101e-10	19.9390024691775	2.58294089593065
TGGT1_289570:E011	TGGT1_289570	E011	0.0134434544464432	1.17853816756646e-12	2.48123319724256e-10	74.2005553647913	-0.863204936275211
TGGT1_225220:E032	TGGT1_225220	E032	0.00915336665658738	1.20491215094197e-12	2.52971306090267e-10	109.215810224373	0.706307301015189
TGGT1_257300:E021	TGGT1_257300	E021	0.013081936187288	1.25204370941069e-12	2.62138414528197e-10	76.2608897243595	0.848674680727244
TGGT1_264950:E008	TGGT1_264950	E008	0.0429237242398019	1.31196318926747e-12	2.73924866771309e-10	23.1651279096762	1.83043332825696
TGGT1_227840:E013	TGGT1_227840	E013	0.0104602767143779	1.35168608503237e-12	2.81441150630624e-10	95.4886304537618	0.744223798649721
TGGT1_219070:E023	TGGT1_219070	E023	0.0451080760956014	1.49437162381705e-12	3.10295593602583e-10	22.0418092264747	1.95104345129063
TGGT1_209250:E004	TGGT1_209250	E004	0.014657045024195	1.61425351036666e-12	3.34269887179543e-10	410.373756866491	0.736796928259385
TGGT1_220500:E009	TGGT1_220500	E009	0.00390624859463659	2.22120587599037e-12	4.58697219997552e-10	258.298059089753	0.42623711839757
TGGT1_314430:E018	TGGT1_314430	E018	0.0142927947952522	2.34309289348067e-12	4.82549447070997e-10	69.7719381521839	0.887594291474063
TGGT1_277510:E022	TGGT1_277510	E022	0.0337271370633868	2.44714371129819e-12	5.02608739096033e-10	29.4933913946623	1.40191474528243
TGGT1_278660:E009	TGGT1_278660	E009	0.0271407054886589	2.57821282850366e-12	5.28093447165214e-10	36.6672267958884	1.33216485938684
TGGT1_207990:E010	TGGT1_207990	E010	0.0251902453801159	2.60925374553086e-12	5.33007071877604e-10	39.513376391202	1.24488970090857
TGGT1_241880:E030	TGGT1_241880	E030	0.0346849125384938	2.66577805187101e-12	5.4308581325206e-10	28.6775076595921	1.55602200739386
TGGT1_240710:E024	TGGT1_240710	E024	0.0342103740373461	2.89667337034206e-12	5.88538620099983e-10	29.076024175157	1.53392687993326
TGGT1_235130:E006	TGGT1_235130	E006	0.00604029723501075	2.93712466748081e-12	5.95157524443792e-10	166.090204003162	0.529309163932161
TGGT1_224350A:E004	TGGT1_224350A	E004	0.0104181198155911	3.01917768219513e-12	6.08521300201792e-10	95.8773485682734	0.746981336133699
TGGT1_269480:E010	TGGT1_269480	E010	0.0619847780108549	3.01632366460529e-12	6.08521300201792e-10	16.0344124805808	2.50575914117687
TGGT1_282090:E002	TGGT1_282090	E002	0.0129136507265669	3.14846219935919e-12	6.32891143489271e-10	77.2595064549882	0.797654522053924
TGGT1_217220:E013	TGGT1_217220	E013	0.0109478798037937	3.38559616884546e-12	6.78753659505776e-10	91.2113715040236	0.76025258371819
TGGT1_285810:E012	TGGT1_285810	E012	0.0388411910081912	3.3973546893292e-12	6.7930915907111e-10	25.6038862318318	1.7528729160199
TGGT1_261022:E064	TGGT1_261022	E064	0.00973069103956122	3.82065751136332e-12	7.6193386813684e-10	116.80333460683	0.70397960655373
TGGT1_228070:E034	TGGT1_228070	E034	0.0617509942700266	3.98155524077295e-12	7.91931337389739e-10	16.0951786136262	2.68741743186863
TGGT1_310290:E006	TGGT1_310290	E006	0.0249649448491192	4.28174060358951e-12	8.49402935171922e-10	50.213244819508	1.2404283527507
TGGT1_206695:E002	TGGT1_206695	E002	0.00865468259103042	4.55472528293465e-12	9.0119174433185e-10	115.55445079	-0.613202789005689
TGGT1_214400:E001	TGGT1_214400	E001	0.00988541649561321	5.01357752066943e-12	9.89389598347876e-10	101.076722020666	-0.683118241507127
TGGT1_217740:E004	TGGT1_217740	E004	0.0222335238379118	5.27606806557463e-12	1.03847858471943e-09	44.7828157107032	1.12695659445282
TGGT1_313910:E002	TGGT1_313910	E002	0.00933582191107213	5.47043936910713e-12	1.073939606223e-09	107.067010168007	0.695690813337045
TGGT1_214180:E006	TGGT1_214180	E006	0.0139439243877668	5.49865562176161e-12	1.07668235545074e-09	175.818260508536	0.763113501564237
TGGT1_299080:E010	TGGT1_299080	E010	0.0208443176274712	5.57573970525447e-12	1.08895493127272e-09	47.7763888820944	1.08803081103399
TGGT1_261022:E061	TGGT1_261022	E061	0.0171064648904781	5.59636357715908e-12	1.0901658553836e-09	119.120509468918	0.856239236090378
TGGT1_239480:E019	TGGT1_239480	E019	0.0437194166843159	5.67775126536748e-12	1.10317685382778e-09	22.742921679966	1.83688517569481
TGGT1_241880:E011	TGGT1_241880	E011	0.0313799979247079	6.02900949381558e-12	1.16543374823931e-09	31.7038041091794	1.42367736731969
TGGT1_248640:E006	TGGT1_248640	E006	0.0685569368265566	6.02324468368094e-12	1.16543374823931e-09	14.495888129962	2.74773691031795
TGGT1_243690:E006	TGGT1_243690	E006	0.00819174294982707	6.13982963163481e-12	1.18382806943424e-09	122.134799630676	0.620293791981008
TGGT1_249300:E019	TGGT1_249300	E019	0.00404973032167808	6.91631762559961e-12	1.33015042946074e-09	249.003647686329	0.429861324327567
TGGT1_219070:E037	TGGT1_219070	E037	0.00421069844546206	6.94428510305767e-12	1.33213948390686e-09	239.341748640122	-0.445177121260592
TGGT1_235370:E009	TGGT1_235370	E009	0.00592920511105217	7.25410162121096e-12	1.38733728009456e-09	169.235172957861	-0.544402882988591
TGGT1_310950:E008	TGGT1_310950	E008	0.0169533016218769	7.26873545179336e-12	1.38733728009456e-09	58.7821552180775	0.936772816537296
TGGT1_253170:E019	TGGT1_253170	E019	0.0191477521064959	7.32827843410541e-12	1.39517869170417e-09	52.0233758975797	1.03230698689907
TGGT1_260200:E002	TGGT1_260200	E002	0.0126774718858209	7.48067938244101e-12	1.42061484694386e-09	78.7059413080354	0.780309296098201
TGGT1_310610:E004	TGGT1_310610	E004	0.00950812194894538	7.51903320902765e-12	1.42431971931009e-09	105.114019640737	0.644780406233123
TGGT1_260340:E013	TGGT1_260340	E013	0.0209304273892834	7.96243647163964e-12	1.50454218349867e-09	47.5792457253597	1.06152768336055
TGGT1_288010:E005	TGGT1_288010	E005	0.00379398987583747	8.21914285304391e-12	1.54917519979742e-09	266.06826902765	-0.368538633021921
TGGT1_297510:E001	TGGT1_297510	E001	0.0140781873960174	8.37029641774038e-12	1.57374065633247e-09	70.8402648941565	0.818930538741975
TGGT1_262490:E013	TGGT1_262490	E013	0.00131772094272061	8.64854367557212e-12	1.62202041708956e-09	790.867057545208	-0.208028003775608
TGGT1_297180:E012	TGGT1_297180	E012	0.00422072129529287	8.94866020628069e-12	1.67415256364135e-09	288.521181712194	0.434477805561588
TGGT1_200330:E030	TGGT1_200330	E030	0.00698351700981616	9.45838643571493e-12	1.76514509526964e-09	143.455601544176	0.570576703276741
TGGT1_277870:E004	TGGT1_277870	E004	0.0131735327146308	9.61214607690574e-12	1.78942173592288e-09	75.7281237042896	0.80978543203675
TGGT1_288860:E024	TGGT1_288860	E024	0.0235983668792566	9.71673864438851e-12	1.80444850176947e-09	42.185888645762	1.20893598724172
TGGT1_285980A:E011	TGGT1_285980A	E011	0.0138791624081707	9.99316768888913e-12	1.85123431436671e-09	116.221397490358	0.774099261885256
TGGT1_206695:E003	TGGT1_206695	E003	0.0146090803388699	1.0359709747042e-11	1.91444396601693e-09	72.3291800676427	-0.836594626417554
TGGT1_220212:E007	TGGT1_220212	E007	0.0538858361319697	1.0395360091485e-11	1.91634660106005e-09	18.4471434788362	2.5309945086786
TGGT1_289570:E020	TGGT1_289570	E020	0.0189646056752665	1.10049382341357e-11	2.02378404285267e-09	52.5274351971473	1.04107252092719
TGGT1_310100:E022	TGGT1_310100	E022	0.045858517134822	1.21869232383279e-11	2.23570881601771e-09	21.6806206791868	2.16389860031261
TGGT1_249350:E013	TGGT1_249350	E013	0.00747034092395399	1.27564389643467e-11	2.32937942540347e-09	134.028361459051	0.569037905870693
TGGT1_263430:E009	TGGT1_263430	E009	0.0381231033479539	1.27591633208573e-11	2.32937942540347e-09	26.0869507231376	1.44658063158294
TGGT1_250220:E028	TGGT1_250220	E028	0.0250960773248408	1.29429501094164e-11	2.35723868715642e-09	39.6620113345273	-1.19442817085322
TGGT1_280610:E033	TGGT1_280610	E033	0.0657267613240487	1.32315283943715e-11	2.40400331515238e-09	15.1206688855158	2.68777078847885
TGGT1_250010:E018	TGGT1_250010	E018	0.0560031357859809	1.38955295919152e-11	2.51858973049434e-09	17.748939521094	2.41162681664489
TGGT1_304650:E011	TGGT1_304650	E011	0.0320143091775338	1.42381001332254e-11	2.57450737863503e-09	31.0744207185167	1.5181587298597
TGGT1_312110:E014	TGGT1_312110	E014	0.0535888121930589	1.48461429321322e-11	2.67804576395326e-09	18.5495084643122	2.13468625181659
TGGT1_277840:E013	TGGT1_277840	E013	0.0348374021354055	1.53934681766255e-11	2.77016455172787e-09	38.6269251754505	1.36671710967066
TGGT1_242880:E011	TGGT1_242880	E011	0.0400358013635411	1.59462490446585e-11	2.86282516696765e-09	24.8387131210948	1.64424832901374
TGGT1_270840:E033	TGGT1_270840	E033	0.0639924970480514	1.60559977544242e-11	2.87569768311585e-09	15.5308541621438	2.45938516643049
TGGT1_242790B:E023	TGGT1_242790B	E023	0.0381949403662291	1.63981108029766e-11	2.93002839411485e-09	26.0378062762321	1.48934510227237
TGGT1_257300:E020	TGGT1_257300	E020	0.0146463860653601	1.6924687649392e-11	3.01698524036875e-09	68.0803199339561	0.848487590962974
TGGT1_255670:E006	TGGT1_255670	E006	0.00476129109337555	1.70234797491208e-11	3.02745563858365e-09	211.297621889853	0.410184167145127
TGGT1_236650:E005	TGGT1_236650	E005	0.00439917284527343	1.78031201324436e-11	3.1586747085689e-09	850.683506520224	0.384315017732782
TGGT1_321440:E002	TGGT1_321440	E002	0.00977977430016503	1.79671834790396e-11	3.1803177089292e-09	102.175560963479	0.689227954298325
TGGT1_283510:E007	TGGT1_283510	E007	0.00826120342881531	1.80139935505822e-11	3.18115341247688e-09	164.431260149463	-0.589169778978871
TGGT1_217520:E001	TGGT1_217520	E001	0.00138338302780164	1.86941151928763e-11	3.29356320398129e-09	751.559163702773	-0.234374939026863
TGGT1_290640:E023	TGGT1_290640	E023	0.0370971200461462	2.0431168130016e-11	3.59122918512295e-09	86.9836655250242	1.23712847927037
TGGT1_255190:E023	TGGT1_255190	E023	0.0082890410434844	2.0595984294232e-11	3.60498555300473e-09	120.690309427196	0.6384283971131
TGGT1_267710:E002	TGGT1_267710	E002	0.0520684694666112	2.06048233560642e-11	3.60498555300473e-09	26.2704065537819	1.73955070283085
TGGT1_273360:E016	TGGT1_273360	E016	0.0251998797168234	2.13922368151173e-11	3.73410633478105e-09	39.4982323401035	1.17135417962174
TGGT1_270520:E010	TGGT1_270520	E010	0.00285513542593003	2.22459737502669e-11	3.87418246081262e-09	355.510391731251	0.336683232371231
TGGT1_257300:E010	TGGT1_257300	E010	0.0135243572961369	2.25550138429742e-11	3.91897254317167e-09	73.7546335394172	0.798579671974438
TGGT1_244290:E028	TGGT1_244290	E028	0.011365841338377	2.3306114119593e-11	4.0401897187777e-09	87.8387328909485	-0.739549605583471
TGGT1_235710:E002	TGGT1_235710	E002	0.026592996545548	2.40806027389284e-11	4.16489729110684e-09	71.5195301099936	0.991078980076403
TGGT1_201630A:E003	TGGT1_201630A	E003	0.0093685978571289	2.56890129421476e-11	4.43293830181142e-09	106.68993078371	0.646472095128681
TGGT1_219500:E012	TGGT1_219500	E012	0.0063967313336113	2.67122214881827e-11	4.5990048394529e-09	156.744459455016	0.530784316312351
TGGT1_225560:E010	TGGT1_225560	E010	0.00149613144339354	2.78136142626245e-11	4.77774680272201e-09	692.461827677632	-0.262611632781105
TGGT1_202540:E004	TGGT1_202540	E004	0.0231095614784713	2.86665870516488e-11	4.91310200121933e-09	43.0806009187983	1.11796994405313
No_genes_on_ref_contig_268+No_genes_on_ref_contig_269+No_genes_on_ref_contig_272+No_genes_on_ref_contig_271+No_genes_on_ref_contig_270:E006	No_genes_on_ref_contig_268+No_genes_on_ref_contig_269+No_genes_on_ref_contig_272+No_genes_on_ref_contig_271+No_genes_on_ref_contig_270	E006	0.00311950982956243	2.87625207244136e-11	4.91839104387473e-09	324.767629589226	-0.371489527158426
TGGT1_314430:E019	TGGT1_314430	E019	0.0190661734031369	2.89920753482146e-11	4.94645381257056e-09	167.674165359584	0.816273498874962
TGGT1_281580:E010	TGGT1_281580	E010	0.00799066752373412	2.97713322638282e-11	5.06796584496546e-09	125.23231357658	0.589511150547712
TGGT1_305480:E007	TGGT1_305480	E007	0.0352273507463619	3.00230081819001e-11	5.09932360540309e-09	28.2351433118883	1.49636481305569
TGGT1_224350A:E007	TGGT1_224350A	E007	0.0170788830009652	3.04578480059753e-11	5.16158086992742e-09	58.3483470200843	0.93642071169892
TGGT1_278040:E002	TGGT1_278040	E002	0.0126351435369852	3.19201234157386e-11	5.38523832144722e-09	101.817544734618	0.682533325267545
TGGT1_310100:E023	TGGT1_310100	E023	0.0480152368110949	3.18571151978079e-11	5.38523832144722e-09	20.7055188439712	2.12531218845665
TGGT1_227840:E009	TGGT1_227840	E009	0.0139532818112567	3.21048332915868e-11	5.40433743840693e-09	71.4772485725665	0.811825794112109
TGGT1_295760:E037	TGGT1_295760	E037	0.0761790515504902	3.39611684609433e-11	5.70411785470004e-09	13.0443116557484	2.52945120468378
TGGT1_284040:E024	TGGT1_284040	E024	0.0362823998012228	3.52858249632628e-11	5.9134661249963e-09	27.4126872517584	1.51390227740457
TGGT1_236160:E006	TGGT1_236160	E006	0.0109349373452908	3.56646725490433e-11	5.95056794834832e-09	91.3199465095623	0.716647955851078
TGGT1_292190:E010	TGGT1_292190	E010	0.0135940388125741	3.56411389513819e-11	5.95056794834832e-09	73.3748357005406	0.784991739156587
TGGT1_259115:E028	TGGT1_259115	E028	0.00446639181279581	3.76004854821599e-11	6.25973544870619e-09	380.606806210951	0.408370549843352
TGGT1_240710:E025	TGGT1_240710	E025	0.0399717778436431	3.84693466028685e-11	6.39030803283079e-09	28.8520764308635	1.5311415307906
TGGT1_262140:E005	TGGT1_262140	E005	0.0205733162771121	3.99523562369571e-11	6.60761266761857e-09	48.4076325928604	1.02409484135018
TGGT1_263000:E013	TGGT1_263000	E013	0.0133225245958959	3.99263855812148e-11	6.60761266761857e-09	74.8772441332928	0.797674895237648
TGGT1_301390:E027	TGGT1_301390	E027	0.0290226953102698	4.3585563988107e-11	7.19276003788014e-09	34.2844109900734	1.22329953178399
TGGT1_244060:E007	TGGT1_244060	E007	0.0142909398851141	4.41365613709109e-11	7.26782043907666e-09	69.7810339229476	0.855142642438104
TGGT1_311335:E029	TGGT1_311335	E029	0.00528645490653596	4.53982033552839e-11	7.45931957825885e-09	190.05680254298	0.489235103533697
TGGT1_223070:E013	TGGT1_223070	E013	0.00654823904512053	4.61219376385639e-11	7.56179672580897e-09	153.083015508032	0.549488829622964
TGGT1_263740:E002	TGGT1_263740	E002	0.00919223847129701	4.68316269326029e-11	7.65818566218581e-09	256.351358630185	0.563666860391057
TGGT1_266950:E015	TGGT1_266950	E015	0.00635055520217432	4.69124918842057e-11	7.65818566218581e-09	157.895466146207	0.512402149110644
TGGT1_217760:E015	TGGT1_217760	E015	0.0112698315798348	4.70668728378948e-11	7.66682841127967e-09	88.5912051503848	0.713344657365423
TGGT1_311920:E021	TGGT1_311920	E021	0.0297999075768813	4.7920855130355e-11	7.78914854293009e-09	33.3883657325552	1.36578039309115
TGGT1_291680:E007	TGGT1_291680	E007	0.00267030000803989	4.90611773502996e-11	7.95738606542993e-09	380.70605044991	0.331055766231564
TGGT1_266280:E022	TGGT1_266280	E022	0.0509057791160515	4.93838607278776e-11	7.99257165210801e-09	19.5283738177156	2.05111882767079
TGGT1_227948:E011	TGGT1_227948	E011	0.0103791848710378	5.04944572672828e-11	8.15485484866618e-09	96.2391797020809	0.705855906405376
TGGT1_267510:E006	TGGT1_267510	E006	0.0129504771284348	5.22371022488433e-11	8.41830418373576e-09	77.0387472233058	0.749447107359448
TGGT1_222660:E028	TGGT1_222660	E028	0.0524401997453828	5.27745670723866e-11	8.48682410311728e-09	18.9562866320766	1.94433291369584
TGGT1_227650:E003	TGGT1_227650	E003	0.0127005259819659	5.73183286343485e-11	9.19794886378201e-09	78.5623696762406	0.762160413888558
TGGT1_208050:E011	TGGT1_208050	E011	0.0696673262745782	6.02366042348539e-11	9.64576911287866e-09	14.2646393787621	2.67755853591015
TGGT1_278630:E007	TGGT1_278630	E007	0.0190453829567819	6.03941929349526e-11	9.65055790784267e-09	52.3039194590363	1.18204266867524
No_genes_on_ref_contig_268+No_genes_on_ref_contig_269+No_genes_on_ref_contig_272+No_genes_on_ref_contig_271+No_genes_on_ref_contig_270:E001	No_genes_on_ref_contig_268+No_genes_on_ref_contig_269+No_genes_on_ref_contig_272+No_genes_on_ref_contig_271+No_genes_on_ref_contig_270	E001	0.00175104085295633	6.17296050297665e-11	9.84313714632871e-09	587.938740823254	-0.268413840399662
TGGT1_225560:E014	TGGT1_225560	E014	0.00190804250039574	6.3523472680123e-11	1.01078549728612e-08	537.928464141637	0.27329305625127
TGGT1_275990:E015	TGGT1_275990	E015	0.016068853028477	6.84787045274355e-11	1.08734400117492e-08	62.0301819929994	0.871968584697131
TGGT1_311680:E002	TGGT1_311680	E002	0.00471875402165746	6.93138092310976e-11	1.09829692438256e-08	213.227831768223	0.410086569245507
TGGT1_300200:E002	TGGT1_300200	E002	0.00612086335629106	7.0736578793236e-11	1.11849625488501e-08	415.096399420444	-0.460156061398417
TGGT1_294270:E011	TGGT1_294270	E011	0.040249389666343	7.10137546211809e-11	1.12053478116453e-08	24.7066992006251	1.56341712478483
TGGT1_202830:E008	TGGT1_202830	E008	0.0128231434483989	7.24445478555126e-11	1.14072996166987e-08	77.8074744547951	0.758072186110443
TGGT1_310100:E020	TGGT1_310100	E020	0.0629556908245807	7.95102168697218e-11	1.24938486724476e-08	15.7868823330027	2.94653193594585
TGGT1_300250:E003	TGGT1_300250	E003	0.0373717386793461	8.17773028327924e-11	1.28234275989795e-08	26.6123083957796	1.49944903071029
TGGT1_286920:E006	TGGT1_286920	E006	0.00318638586071985	8.37496847561542e-11	1.31055252033947e-08	354.203434249192	0.349068731930311
TGGT1_310560:E026	TGGT1_310560	E026	0.0141811088481497	9.83504229641228e-11	1.53585158439552e-08	70.3238636861584	0.873136976287661
TGGT1_233760:E005	TGGT1_233760	E005	0.0442971793832354	1.00476180770993e-10	1.56581251443984e-08	38.2269712622135	1.45629040905238
TGGT1_277030:E038	TGGT1_277030	E038	0.0346731553788537	1.00954473914522e-10	1.57002902210028e-08	28.6872492792932	1.40651168594086
TGGT1_244100:E016	TGGT1_244100	E016	0.0399271890736324	1.02171249775815e-10	1.58568940463155e-08	24.9412290550969	1.55960857570697
TGGT1_288650:E005	TGGT1_288650	E005	0.00161035023333892	1.03964474827429e-10	1.6102137164768e-08	2467.12086517224	0.217895515544356
TGGT1_261022:E063	TGGT1_261022	E063	0.00778173534911426	1.0699508181967e-10	1.65038821920291e-08	180.214831529008	0.566599425193882
TGGT1_267300:E002	TGGT1_267300	E002	0.0190924166014682	1.06993811878025e-10	1.65038821920291e-08	52.1746485373783	0.975106615300189
TGGT1_263100:E014	TGGT1_263100	E014	0.00814209641215246	1.12071726661101e-10	1.72517418421575e-08	122.885258026861	0.586945353787088
TGGT1_318330:E005	TGGT1_318330	E005	0.0240570290235378	1.14096014113471e-10	1.75276523144804e-08	41.3795011327051	1.11019551615524
TGGT1_310860:E008	TGGT1_310860	E008	0.0143405239562972	1.1605479992114e-10	1.77924013948065e-08	69.5387053483842	0.792738226882093
TGGT1_207990:E012	TGGT1_207990	E012	0.0542281692820713	1.1810750564877e-10	1.80704483642617e-08	18.330555932306	1.99137787194105
TGGT1_230420:E026	TGGT1_230420	E026	0.0297088089135502	1.21740581833338e-10	1.85886801133886e-08	33.4909623963841	1.25152047767417
TGGT1_250100:E001	TGGT1_250100	E001	0.00221593355007539	1.33293053066794e-10	2.0270735486709e-08	461.025211343941	-0.240737869959763
TGGT1_278060:E014	TGGT1_278060	E014	0.0111955751117212	1.33271964165231e-10	2.0270735486709e-08	89.1820874445438	0.705161056712654
TGGT1_220230A:E013	TGGT1_220230A	E013	0.0281437305437486	1.34663208857685e-10	2.04379812286779e-08	35.3575316156385	1.20450841262835
TGGT1_275980:E012	TGGT1_275980	E012	0.027400275371421	1.34979355777238e-10	2.04449091550205e-08	49.5968427427412	1.08005448356201
TGGT1_206610:E003	TGGT1_206610	E003	0.0292136475348619	1.3639124522907e-10	2.06174461938071e-08	34.0598354746052	1.24679791079915
TGGT1_275750:E002	TGGT1_275750	E002	0.0134452917157638	1.52797943382286e-10	2.30055262086055e-08	74.1903688421783	0.766940291954155
TGGT1_309090:E010	TGGT1_309090	E010	0.0206972716915105	1.52705689209057e-10	2.30055262086055e-08	48.1168456252593	0.935506586774658
TGGT1_257390:E011	TGGT1_257390	E011	0.0171975723707534	1.5488846056832e-10	2.32739157587968e-08	57.9441912983948	0.95416087690153
TGGT1_255320:E006	TGGT1_255320	E006	0.0374899240573812	1.56001101444897e-10	2.33945937488259e-08	26.5282746454715	1.40147681100281
TGGT1_270370:E007	TGGT1_270370	E007	0.0151532600420648	1.57542868734355e-10	2.35790200092673e-08	65.7936473237645	0.79213625955723
TGGT1_290850:E016	TGGT1_290850	E016	0.0874536614665851	1.5955831659597e-10	2.38334717094004e-08	44.004851998804	1.94146997956472
TGGT1_314000:E007	TGGT1_314000	E007	0.0399002694237182	1.62453997921264e-10	2.42181421516468e-08	24.9232163449142	1.43467770122765
TGGT1_277030:E030	TGGT1_277030	E030	0.0659455282142934	1.64354507246504e-10	2.44532330053253e-08	15.0704603493314	2.36825186797806
TGGT1_237830:E009	TGGT1_237830	E009	0.0110948249019823	1.67692891314172e-10	2.49009118100348e-08	89.9965060487996	0.710398826494251
TGGT1_202790:E015	TGGT1_202790	E015	0.0434621428309231	1.8021996418711e-10	2.67085986925297e-08	22.8777414241308	1.60817896970022
TGGT1_242845:E006	TGGT1_242845	E006	0.0045884227113273	1.88501760624057e-10	2.78812917250244e-08	592.883200459862	0.123302481873154
TGGT1_290960:E019	TGGT1_290960	E019	0.0234870395802571	1.95912578291685e-10	2.89208290868011e-08	42.3863790708672	1.06691594119277
TGGT1_253170:E004	TGGT1_253170	E004	0.0466193472136293	1.97677608291162e-10	2.91245009548979e-08	21.3263185828053	1.75168202397055
TGGT1_258980:E007	TGGT1_258980	E007	0.0311837282620748	2.1305489909134e-10	3.13290182551006e-08	31.9037464079609	1.22109769773664
TGGT1_262880:E013	TGGT1_262880	E013	0.0621434823528009	2.14938382705514e-10	3.1544607459511e-08	15.9934221232156	2.20992355430716
TGGT1_208050:E010	TGGT1_208050	E010	0.0739150901587735	2.35910241675397e-10	3.45553641207555e-08	13.4441856192057	2.64148107961696
TGGT1_221320:E010	TGGT1_221320	E010	0.079340726524694	2.3820197850428e-10	3.48235627452814e-08	12.5240962271379	2.64377720068366
TGGT1_280700:E026	TGGT1_280700	E026	0.0192806261719638	2.5601783129028e-10	3.73558681941737e-08	51.6636906499248	0.959188477164773
TGGT1_224290:E006	TGGT1_224290	E006	0.0107180798737746	2.6251806259537e-10	3.82305206302182e-08	93.1784088832885	0.682835502472671
TGGT1_295760:E027	TGGT1_295760	E027	0.0326915115059782	2.6388521958368e-10	3.83557166664879e-08	30.429487762	1.25333238237418
TGGT1_261022:E108	TGGT1_261022	E108	0.0211017102923233	2.68701628719244e-10	3.89808186216083e-08	273.768063010465	0.799780969824506
TGGT1_278510:E014	TGGT1_278510	E014	0.00308661455115104	2.724270565517e-10	3.94455589813996e-08	328.300077213782	-0.34794642027002
TGGT1_293190:E012	TGGT1_293190	E012	0.010820730642	2.82851097349247e-10	4.08765805733285e-08	92.2893560825407	0.686796292030073
TGGT1_278510:E016	TGGT1_278510	E016	0.00313860072146341	2.91655775721261e-10	4.20685626728327e-08	322.752204706486	-0.350870087624808
TGGT1_239050:E030	TGGT1_239050	E030	0.0230066493714789	2.95741513635147e-10	4.25760390469458e-08	43.2738297822324	1.05297638910512
TGGT1_299810:E004	TGGT1_299810	E004	0.0321018168774066	2.96300660722044e-10	4.25760390469458e-08	30.9895489972043	1.2547636084641
TGGT1_291350:E019	TGGT1_291350	E019	0.0467397254922136	3.00541331348827e-10	4.31034438444157e-08	21.2713193169029	1.75096451602377
TGGT1_285150:E016	TGGT1_285150	E016	0.0255248941739819	3.22815072272826e-10	4.62102439252363e-08	38.9940620354216	1.08474923936076
TGGT1_241140:E014	TGGT1_241140	E014	0.0504906295523692	3.31662313952467e-10	4.73869584369667e-08	19.6891404324038	1.87081670963741
TGGT1_314970:E011	TGGT1_314970	E011	0.0714584950407701	3.37495162257786e-10	4.81293572712603e-08	13.9067720232097	2.56874393949234
TGGT1_225120:E016	TGGT1_225120	E016	0.000985301275850111	3.4289937063381e-10	4.88079477047922e-08	1991.64452328373	0.16185412969125
TGGT1_257300:E006	TGGT1_257300	E006	0.0282725674743133	3.50419413195247e-10	4.97845866318104e-08	35.196053111806	1.15235934701671
TGGT1_297510:E002	TGGT1_297510	E002	0.0175133258157151	3.52452249097207e-10	4.99794482012479e-08	56.8957685957398	0.851413132590089
TGGT1_222350:E001	TGGT1_222350	E001	0.00105367974715238	3.70246227282354e-10	5.24044014053462e-08	1001.49894360945	-0.159564536410854
TGGT1_257390:E008	TGGT1_257390	E008	0.0340612646231359	4.0988377220596e-10	5.79062341511605e-08	29.2035429326614	1.49916569246394
TGGT1_247330:E011	TGGT1_247330	E011	0.00974769929502287	4.2825290956588e-10	6.03884541246424e-08	102.513933500666	0.632611342109403
TGGT1_207760:E007	TGGT1_207760	E007	0.0466637312211625	4.37579568941069e-10	6.15887131838062e-08	21.3060070398121	1.57315108376149
TGGT1_227620:E002	TGGT1_227620	E002	0.0024770554128321	4.40385037049568e-10	6.18683677886254e-08	3912.46030978722	-0.24333712344137
TGGT1_228000:E004	TGGT1_228000	E004	0.0208596190605633	4.43965409526155e-10	6.22556467213466e-08	47.7412378930812	0.956555180374821
TGGT1_219790A:E003	TGGT1_219790A	E003	0.0555969649848476	4.45129219832314e-10	6.23032531358629e-08	17.878752093506	1.59764415143606
TGGT1_257350:E014	TGGT1_257350	E014	0.0228995531019641	4.45995191859892e-10	6.23090731814314e-08	48.8044608541308	1.00776872913141
TGGT1_217350:E015	TGGT1_217350	E015	0.0166832516550127	4.59980259324493e-10	6.41443320300071e-08	59.7372205704188	0.843971662029189
TGGT1_289250:E007	TGGT1_289250	E007	0.030020882694755	4.8494758120452e-10	6.75014881815838e-08	33.1420926716869	1.16708483710951
TGGT1_216250:E013	TGGT1_216250	E013	0.0708254899386584	4.96318560580294e-10	6.89572600106246e-08	14.0311736298004	2.53152916840892
TGGT1_235660:E010	TGGT1_235660	E010	0.0105383929108147	4.99821362930257e-10	6.93165105559536e-08	94.7766101643305	0.621202781672561
TGGT1_299670:E024	TGGT1_299670	E024	0.00134905114057301	5.15337879672992e-10	7.13374864861613e-08	771.611168574422	0.206510779041746
TGGT1_262140:E017	TGGT1_262140	E017	0.0182226115586033	5.17520291149676e-10	7.15086264089119e-08	54.6735984816928	0.882176446372583
TGGT1_280710:E007	TGGT1_280710	E007	0.0718292822787247	5.21919897663688e-10	7.1984944717549e-08	16.4558466258184	2.15231290859973
TGGT1_277530:E011	TGGT1_277530	E011	0.0321837677209745	5.26908393134265e-10	7.25406014023207e-08	30.9104860566279	1.30669579078083
TGGT1_220610:E007	TGGT1_220610	E007	0.0257105535263093	5.30709362245288e-10	7.29310454858607e-08	38.7117969994951	1.0936478867391
TGGT1_311240:E005	TGGT1_311240	E005	0.0163467829321834	5.42893901259384e-10	7.44700668693045e-08	60.9715044805531	0.835844058012649
TGGT1_257680:E002	TGGT1_257680	E002	0.00311241276231594	5.54936168473187e-10	7.59840316767037e-08	325.523299586023	0.348504431389073
TGGT1_294280:E010	TGGT1_294280	E010	0.0681641676109589	5.88342542968311e-10	8.04124883953542e-08	14.5794913659272	2.19002897154516
TGGT1_202500:E009	TGGT1_202500	E009	0.004991852640365	5.94768620324088e-10	8.11440466811106e-08	246.877285794789	-0.456013388360438
TGGT1_207750:E017	TGGT1_207750	E017	0.0158787199827039	6.1487658980675e-10	8.37362205599528e-08	83.9509791706286	0.788443566261117
TGGT1_227840:E007	TGGT1_227840	E007	0.00916286479087194	6.25870581092092e-10	8.50801263670909e-08	109.101823500631	0.598005011957713
TGGT1_297520:E001	TGGT1_297520	E001	0.0207438448197289	6.36033831426013e-10	8.63064794377754e-08	48.008490600761	0.972722071453825
TGGT1_313480:E022	TGGT1_313480	E022	0.0379457817866633	6.43346777364303e-10	8.71423586500874e-08	26.2090560720228	1.4256081228379
TGGT1_283730:E016	TGGT1_283730	E016	0.0220643040447747	6.70046089644244e-10	9.05964643067821e-08	45.1272447969235	0.970781672972402
TGGT1_310100:E002	TGGT1_310100	E002	0.0102152784956388	7.46831253942599e-10	1.00798213991946e-07	97.7928298007502	-0.606597115332988
TGGT1_233260:E026	TGGT1_233260	E026	0.025069416978968	7.66038076424596e-10	1.03206220841932e-07	39.7042953722124	0.988270889359131
TGGT1_231210:E002	TGGT1_231210	E002	0.00390160544339382	8.19757244397122e-10	1.10247138871927e-07	258.610435668115	0.373864492009153
TGGT1_256820:E003	TGGT1_256820	E003	0.0287162793083175	8.25363699266205e-10	1.10803977118896e-07	34.6510366098896	1.14659340225959
TGGT1_224290:E007	TGGT1_224290	E007	0.0162846087165003	8.47448451161901e-10	1.1356710786475e-07	61.2051857437558	0.846362958865358
TGGT1_304955:E026	TGGT1_304955	E026	0.00619243897372221	8.55290287033225e-10	1.14415133583266e-07	249.423795494305	0.488943391177875
TGGT1_217020:E006	TGGT1_217020	E006	0.00676586050545375	8.58714394905388e-10	1.14670232147949e-07	148.113413999572	0.511368250494767
TGGT1_215700:E011	TGGT1_215700	E011	0.0147142013628899	8.61016027358292e-10	1.14774803138967e-07	69.1146438585745	0.773945682333245
TGGT1_310150:E006	TGGT1_310150	E006	0.0065301950208866	8.71921843842902e-10	1.16023938030518e-07	293.855178053576	0.4403885320915
TGGT1_321360:E015	TGGT1_321360	E015	0.0237217210919533	9.19217626012434e-10	1.22102472072534e-07	41.9659423702862	1.06683568390399
TGGT1_289570:E019	TGGT1_289570	E019	0.0243111410505014	9.21904081243544e-10	1.22244481172894e-07	40.9458714190316	1.06022549269054
TGGT1_282055:E025	TGGT1_282055	E025	0.0032642961818084	9.23757463600733e-10	1.22275720864922e-07	310.082555525583	0.349864789092338
TGGT1_225220:E038	TGGT1_225220	E038	0.0113242061760645	9.38538344458413e-10	1.24015043970027e-07	88.1634711436733	0.67341562301767
TGGT1_225120:E011	TGGT1_225120	E011	0.000822842077036438	9.42132923694147e-10	1.24272758531677e-07	1423.97460986014	-0.149722777378597
TGGT1_311335:E042	TGGT1_311335	E042	0.00411748672694891	1.01026800662494e-09	1.33028007799174e-07	244.843176525479	0.402593539588788
TGGT1_316730:E027	TGGT1_316730	E027	0.0522300210319105	1.06365253475906e-09	1.39813888490712e-07	19.0326596446776	1.67771982442835
TGGT1_250750:E010	TGGT1_250750	E010	0.0204407662732201	1.06591584193139e-09	1.39868144383435e-07	48.7224955410161	0.92440039040127
TGGT1_227952:E004	TGGT1_227952	E004	0.00853178947722971	1.11200575122327e-09	1.45494704103053e-07	117.231152100002	0.568873683362604
TGGT1_273200:E006	TGGT1_273200	E006	0.00627596822554095	1.11264506061714e-09	1.45494704103053e-07	159.790787452163	0.474837334953297
TGGT1_219510:E007	TGGT1_219510	E007	0.0114853580477349	1.12303590942785e-09	1.46599827472151e-07	86.9196993754549	0.656235528443323
TGGT1_242000:E007	TGGT1_242000	E007	0.00362186951697836	1.15643429579648e-09	1.50699339560154e-07	278.933713053249	0.372651827673074
TGGT1_230350:E011	TGGT1_230350	E011	0.0169734634916841	1.20899906339483e-09	1.57278084697948e-07	160.118064041955	0.724385801827049
TGGT1_207430:E003	TGGT1_207430	E003	0.0393459999768703	1.22896285296055e-09	1.59600464523135e-07	25.2748677550704	1.3651190007096
TGGT1_311335:E011	TGGT1_311335	E011	0.00282162624772738	1.25663057544185e-09	1.62913640056683e-07	359.827660303064	-0.321737551536292
TGGT1_208530:E013	TGGT1_208530	E013	0.0515963228204964	1.33518766669105e-09	1.72801633944936e-07	19.2666983598609	1.65843533010297
TGGT1_214940:E005	TGGT1_214940	E005	0.0150856847390478	1.41929347543983e-09	1.83372717026827e-07	590.929983238777	0.62824634050325
TGGT1_218740:E004	TGGT1_218740	E004	0.00778970183596086	1.5455039822555e-09	1.99338365165247e-07	128.489205951495	-0.531072847300591
TGGT1_240910:E033	TGGT1_240910	E033	0.0383251331623797	1.66323112785059e-09	2.14157300008865e-07	25.9492103125687	1.44845822442937
TGGT1_299040:E003	TGGT1_299040	E003	0.00486919511517702	1.69240591135152e-09	2.17543237400971e-07	206.554488669481	0.39843872141821
TGGT1_234280:E013	TGGT1_234280	E013	0.0163162256874658	1.75847882186731e-09	2.25652540431876e-07	61.0861302230452	0.802979959510411
TGGT1_270830:E005	TGGT1_270830	E005	0.0122207771007275	1.87804989778533e-09	2.4058774131256e-07	81.6622752551813	0.681153696207062
TGGT1_311920:E019	TGGT1_311920	E019	0.0363859162792945	1.93901290786649e-09	2.47977112694357e-07	110.048802322064	1.05264258932255
TGGT1_280560:E016	TGGT1_280560	E016	0.0517862784357935	1.95913107952369e-09	2.50126765629324e-07	19.1959417036095	1.67238165944992
TGGT1_203450:E012	TGGT1_203450	E012	0.0164486827167919	2.12055484591773e-09	2.70279555420159e-07	78.8204178982412	0.740809416223986
TGGT1_314970:E013	TGGT1_314970	E013	0.0439819635519733	2.23838040327857e-09	2.84816948889901e-07	22.6069670995744	1.5081230918839
TGGT1_209250:E011	TGGT1_209250	E011	0.0141806584810997	2.35298526749455e-09	2.98896357122308e-07	70.3261069706487	0.78071467098556
TGGT1_200400:E005	TGGT1_200400	E005	0.013073464640575	2.38171492929106e-09	3.02038217761203e-07	76.310542961308	0.706766061611739
TGGT1_251490:E003	TGGT1_251490	E003	0.0105618910475377	2.47090700177619e-09	3.12824276395726e-07	94.5645001498486	0.583705244045197
TGGT1_246050:E004	TGGT1_246050	E004	0.0165167228985209	2.5048475274536e-09	3.16590946187288e-07	60.3417966113976	0.815306656643534
TGGT1_214480:E001	TGGT1_214480	E001	0.0112927831666741	2.55736504218937e-09	3.22689089513784e-07	88.4101529058371	0.603232635119073
TGGT1_245730:E005	TGGT1_245730	E005	0.0645687075924283	2.63570380108898e-09	3.31467162552259e-07	15.3921231619799	1.99537808693797
TGGT1_275320:E036	TGGT1_275320	E036	0.00802590043051898	2.63373478555272e-09	3.31467162552259e-07	124.678257087371	0.54565923608968
TGGT1_261370:E011	TGGT1_261370	E011	0.0221172111299592	2.66258428331434e-09	3.34291437377848e-07	78.4689202217235	0.851031324714361
TGGT1_305140:E012	TGGT1_305140	E012	0.0319175790535773	2.70629872447081e-09	3.39216368479192e-07	31.1687796531777	1.18879191245601
TGGT1_211700:E013	TGGT1_211700	E013	0.00777742730232644	2.71122403962749e-09	3.39271085038287e-07	130.164760683258	-0.513696612706028
TGGT1_271440:E026	TGGT1_271440	E026	0.0153073668856945	2.71582404370615e-09	3.39284979952724e-07	65.1285643386315	0.756844714067649
TGGT1_240070:E005	TGGT1_240070	E005	0.0125115213711959	2.74675978105699e-09	3.42583494673019e-07	156.953456098344	0.580115066629526
TGGT1_294700:E012	TGGT1_294700	E012	0.0147340937826134	2.76001010147077e-09	3.436690008062e-07	67.6733377132395	0.725462897183035
TGGT1_211440:E015	TGGT1_211440	E015	0.0241296036323239	3.05454533002889e-09	3.79718166339217e-07	41.2547219711459	1.03159664648817
TGGT1_306220:E015	TGGT1_306220	E015	0.0411279079568142	3.1867060517317e-09	3.9549690772083e-07	24.1781480618106	1.34156355316187
TGGT1_229140:E007	TGGT1_229140	E007	0.00769548479258172	3.22139491847963e-09	3.99146673325455e-07	130.075153826821	0.523384240580475
TGGT1_214170:E010	TGGT1_214170	E010	0.0589859418522293	3.27210953436209e-09	4.04105527493718e-07	16.8504610799831	1.7961383726739
TGGT1_222110:E030	TGGT1_222110	E030	0.00206068112931297	3.27165838947788e-09	4.04105527493718e-07	496.841391878808	0.210072703858188
TGGT1_223140:E017	TGGT1_223140	E017	0.0117254621779212	3.36408295871138e-09	4.14743967094851e-07	85.1303275487631	0.646126254694139
TGGT1_289320:E017	TGGT1_289320	E017	0.0312138085184677	3.36922542134686e-09	4.14743967094851e-07	225.866743058125	0.90420597335979
TGGT1_209250:E009	TGGT1_209250	E009	0.0113883470732587	3.38277692851193e-09	4.15735033838681e-07	87.6641908965334	0.685811738456346
TGGT1_288400:E016	TGGT1_288400	E016	0.0101845287917727	3.41098107526088e-09	4.18520733166182e-07	98.0899079588164	0.62252569991239
TGGT1_213610:E007	TGGT1_213610	E007	0.0146183680266541	3.44042047416775e-09	4.21448720062475e-07	75.9059513284027	-0.734191668273104
TGGT1_268960:E010	TGGT1_268960	E010	0.00991090907233478	3.92893348655478e-09	4.8051237990418e-07	100.815091216574	0.592506649087828
TGGT1_203160:E010	TGGT1_203160	E010	0.0159273342787388	4.12815330586551e-09	5.04061523689704e-07	62.5835006767982	0.753644029255222
TGGT1_311680:E001	TGGT1_311680	E001	0.00106762518989333	4.14632011927692e-09	5.05463172992239e-07	987.606924465026	-0.0942124774937887
TGGT1_262880:E012	TGGT1_262880	E012	0.069737317606527	4.35081269860172e-09	5.2953804409938e-07	14.250309985189	2.1215243911822
TGGT1_276970:E004	TGGT1_276970	E004	0.0457291448920698	4.36725290501748e-09	5.30684419721916e-07	29.2416586252893	1.32769135793393
TGGT1_221900:E004	TGGT1_221900	E004	0.0361819750252982	4.38608087119721e-09	5.32116796800686e-07	27.4889036367606	1.22673583297571
TGGT1_269200:E013	TGGT1_269200	E013	0.0475158279026938	4.4911194609133e-09	5.43986844703123e-07	20.9234270910563	1.49423489308913
TGGT1_264610:E011	TGGT1_264610	E011	0.0466673532071896	4.75287961272612e-09	5.74771435022505e-07	21.3043512103937	1.44065988796161
TGGT1_277030:E028	TGGT1_277030	E028	0.0753694413908648	4.82255198961021e-09	5.82079099261392e-07	13.1845480731687	2.27249240454778
TGGT1_293810:E011	TGGT1_293810	E011	0.0212664617050848	4.82871047652739e-09	5.82079099261392e-07	46.8252314642757	0.885353795790121
TGGT1_246080:E003	TGGT1_246080	E003	0.019419225412059	4.91169274122145e-09	5.91139427972929e-07	56.1096880495208	0.848924669119495
TGGT1_236650:E004	TGGT1_236650	E004	0.00373542171972346	4.96024588773748e-09	5.96033870726509e-07	270.310715210363	0.367377586552797
TGGT1_244640:E017	TGGT1_244640	E017	0.012996944410437	4.99949233057136e-09	5.99796237030547e-07	76.76198861146	0.681135853119144
TGGT1_278660:E008	TGGT1_278660	E008	0.0484791671723371	5.05079012511555e-09	6.04990204812176e-07	20.5071186911284	1.52314942701741
TGGT1_254470:E008	TGGT1_254470	E008	0.00241667797733428	5.11914381886789e-09	6.1220748119885e-07	421.716632062951	-0.28502810049696
TGGT1_203380:E023	TGGT1_203380	E023	0.0210256041263137	5.16394005458654e-09	6.16589126707361e-07	81.1024526376895	0.825493086319125
TGGT1_313480:E018	TGGT1_313480	E018	0.0655590004772361	5.2311814406769e-09	6.23632737617101e-07	15.1593983974464	2.07817099648162
TGGT1_318290:E006	TGGT1_318290	E006	0.0252394341184662	5.49674234494179e-09	6.54259495929749e-07	39.4361789158279	0.995788582783398
TGGT1_313480:E009	TGGT1_313480	E009	0.018032900820643	5.54883452689495e-09	6.59421401276374e-07	55.2507719608838	0.827374856073841
TGGT1_268210:E016	TGGT1_268210	E016	0.0355373847484142	5.57491179931857e-09	6.60594947766729e-07	27.9883828506948	1.17504294223078
TGGT1_278510:E009	TGGT1_278510	E009	0.00220476820564896	5.57618978956859e-09	6.60594947766729e-07	463.427788350568	-0.26235924975983
TGGT1_310560:E008	TGGT1_310560	E008	0.0125186532831919	5.66656115559291e-09	6.70250430769989e-07	79.7094406544832	0.717339314086747
TGGT1_242880:E010	TGGT1_242880	E010	0.0496204493026269	5.80753328381752e-09	6.85851532277337e-07	20.0348573868276	1.54898573030255
TGGT1_207430:E043	TGGT1_207430	E043	0.0173246268229983	5.8957600148892e-09	6.95184607559057e-07	71.2659319180066	0.771692809937552
TGGT1_235020:E027	TGGT1_235020	E027	0.0373060577677901	5.99333942437174e-09	7.05589689054306e-07	26.6592402737225	1.27401400694658
TGGT1_201630A:E004	TGGT1_201630A	E004	0.00869271863444647	6.01555309870131e-09	7.07103474814996e-07	115.045179862945	0.538476832145178
TGGT1_297150:E002	TGGT1_297150	E002	0.00632044636243885	6.06541474038583e-09	7.11857417558761e-07	158.655120827363	0.367918870272348
TGGT1_288860:E011	TGGT1_288860	E011	0.00554278264769792	6.20981480570891e-09	7.27674763790839e-07	181.167693598394	0.422158207620615
TGGT1_268280:E024	TGGT1_268280	E024	0.00878838091964055	6.22342895367387e-09	7.28141187579843e-07	113.783966130496	0.551178858774273
TGGT1_258080:E029	TGGT1_258080	E029	0.0461517651227074	6.44836125607211e-09	7.53292179994502e-07	21.5426760338325	1.45938626035844
TGGT1_239020:E061	TGGT1_239020	E061	0.0376890184577978	6.50563048771444e-09	7.58809511608693e-07	26.3879055774055	1.2803339642663
TGGT1_200330:E032	TGGT1_200330	E032	0.002327542660547	6.63190714089363e-09	7.72346387554733e-07	438.310628328172	-0.26482249687836
TGGT1_200290:E009	TGGT1_200290	E009	0.0212684271824956	6.98161611831383e-09	8.10700343771085e-07	303.475013337203	-0.702558811302562
TGGT1_215090:E006	TGGT1_215090	E006	0.0622139371765904	6.9826932840488e-09	8.10700343771085e-07	15.975292057256	1.73652134117566
TGGT1_222840:E008	TGGT1_222840	E008	0.00268946307256341	7.5360761779693e-09	8.73606916692141e-07	377.929129273995	0.295894648648601
TGGT1_211350:E011	TGGT1_211350	E011	0.00873355352058009	7.62973149281845e-09	8.83109288958964e-07	114.503407767016	0.539066562316616
TGGT1_253020:E017	TGGT1_253020	E017	0.0133657019681763	7.80671927019891e-09	9.02213235290785e-07	74.6342238486339	0.685016359282758
TGGT1_262490:E008	TGGT1_262490	E008	0.00945542700352748	8.06342965410895e-09	9.3045822918605e-07	108.225593522148	0.573835836794378
TGGT1_245720:E016	TGGT1_245720	E016	0.0329811446627629	8.10795578027006e-09	9.34169990524957e-07	30.1617571670588	1.16774521387936
TGGT1_278660:E005	TGGT1_278660	E005	0.00845254214359779	8.22375412202262e-09	9.46069686530767e-07	118.338417923255	-0.541899256708628
TGGT1_314860:E011	TGGT1_314860	E011	0.0478681370488399	8.37600071307994e-09	9.62119887379952e-07	40.707246719837	1.25468123609023
TGGT1_297180:E007	TGGT1_297180	E007	0.0092656279391497	8.39071959200627e-09	9.62348054936294e-07	107.883610230233	0.588542794866448
TGGT1_280700:E028	TGGT1_280700	E028	0.0199041946269124	8.66222278355217e-09	9.91982003676424e-07	50.0400651077798	0.881318321872966
TGGT1_217220:E014	TGGT1_217220	E014	0.0172018951709724	8.95758768530055e-09	1.02425475405505e-06	57.9295771378627	0.796479230005789
TGGT1_312905:E022	TGGT1_312905	E022	0.00455634091596329	9.63976935357811e-09	1.10003055821679e-06	220.933769746675	-0.394241682295649
TGGT1_356120:E001	TGGT1_356120	E001	0.0126532247315129	9.64939086155083e-09	1.10003055821679e-06	78.8575101032226	-0.634515038189021
TGGT1_259115:E005	TGGT1_259115	E005	0.000810296871045965	1.00096361793347e-08	1.13938000256999e-06	2093.24947167215	-0.135779776150228
TGGT1_262490:E009	TGGT1_262490	E009	0.00123580229261533	1.00652364879286e-08	1.14398602139943e-06	846.073914578147	-0.164703583628503
TGGT1_214090:E021	TGGT1_214090	E021	0.00631255966150917	1.02020592975368e-08	1.15779586460424e-06	158.855314182801	0.463505037276916
TGGT1_263595:E005	TGGT1_263595	E005	0.0148136777560844	1.03885519549876e-08	1.17719270444059e-06	67.3082393461601	0.710798760606177
TGGT1_266640:E002	TGGT1_266640	E002	0.00334790540256035	1.07246937838547e-08	1.21346378079537e-06	302.191905490852	0.326027018532529
TGGT1_268260:E004	TGGT1_268260	E004	0.018160968217521	1.0934857400248e-08	1.23539371005313e-06	54.8598143156705	0.813726219364063
TGGT1_295760:E028	TGGT1_295760	E028	0.0509846447430953	1.13170054540447e-08	1.27552115046109e-06	19.4981293996042	1.43354476973349
TGGT1_319530:E015	TGGT1_319530	E015	0.0185175655275945	1.13237899494508e-08	1.27552115046109e-06	53.7998005473963	0.819318772700967
TGGT1_234280:E020	TGGT1_234280	E020	0.0187343187344512	1.13477708022677e-08	1.27632025710862e-06	53.1752690623133	0.815379235227767
TGGT1_277760:E002	TGGT1_277760	E002	0.022331205667463	1.15159877013878e-08	1.29331557570028e-06	48.5693562003796	0.905879707426875
TGGT1_233090:E004	TGGT1_233090	E004	0.104419541660275	1.1599422403772e-08	1.3007530328218e-06	9.5143442125451	2.99337863082393
TGGT1_256980:E004	TGGT1_256980	E004	0.083519016835802	1.20125542238584e-08	1.34508573829283e-06	11.8970730690816	2.14171569655298
TGGT1_225130:E003	TGGT1_225130	E003	0.0602865947585718	1.21576911128072e-08	1.35932338711271e-06	16.4865449542378	1.61683845394261
TGGT1_220230A:E014	TGGT1_220230A	E014	0.0368488353878985	1.26309771612299e-08	1.41015438079776e-06	26.9905895791675	1.24278347412021
TGGT1_226690:E008	TGGT1_226690	E008	0.020674723093912	1.29878596761893e-08	1.44785901186688e-06	56.172608203902	0.890010854755484
TGGT1_228490:E013	TGGT1_228490	E013	0.0442380177102132	1.30694142034032e-08	1.45480480754289e-06	22.4759312062038	1.35619404157163
TGGT1_273100:E015	TGGT1_273100	E015	0.0176466388506133	1.37066254412817e-08	1.52349141779846e-06	56.4644224529986	0.784775679810312
TGGT1_242030:E003	TGGT1_242030	E003	0.062782761480251	1.38373174505099e-08	1.53575936496981e-06	28.0613271129158	1.57151939232126
TGGT1_269660:E011	TGGT1_269660	E011	0.0213801902112493	1.40732938783646e-08	1.55965938110638e-06	46.5754245044998	0.888091593932306
TGGT1_300280:E007	TGGT1_300280	E007	0.00944272952419842	1.4395720091893e-08	1.59305609953946e-06	105.846783761209	0.535109988065483
TGGT1_244000:E006	TGGT1_244000	E006	0.062758840228322	1.44370682341042e-08	1.59529603986851e-06	15.8364489588865	1.84306741321308
TGGT1_256970:E017	TGGT1_256970	E017	0.0216709062006096	1.46443353962603e-08	1.61583672689072e-06	45.9488128327655	0.897017009998202
TGGT1_240755:E004	TGGT1_240755	E004	0.00711657455235266	1.56261614553707e-08	1.72165675673445e-06	324.975553449621	-0.281080370967543
TGGT1_260170:E009	TGGT1_260170	E009	0.0436216902710692	1.58749753723214e-08	1.7465245831016e-06	22.7939458762513	1.36710291772568
TGGT1_285480:E009	TGGT1_285480	E009	0.0413725288808926	1.59678783085697e-08	1.75419211964872e-06	24.0349758383496	-1.34046039294798
TGGT1_313180:E014	TGGT1_313180	E014	0.0174377580783795	1.6183398894646e-08	1.77528832402777e-06	115.469581769756	0.715313826063636
TGGT1_228460:E013	TGGT1_228460	E013	0.0421547910686008	1.63791771155819e-08	1.79416081847813e-06	23.5883013586623	1.39208994259436
TGGT1_313480:E019	TGGT1_313480	E019	0.069575119229515	1.73804992416609e-08	1.90108957117686e-06	14.2835610652179	2.03329624105366
TGGT1_214240:E003	TGGT1_214240	E003	0.0849703990310473	1.75080467134724e-08	1.91227339118161e-06	19.8845323218238	2.16461965324848
TGGT1_269050:E014	TGGT1_269050	E014	0.0546109362183645	1.8608499319977e-08	2.02953476998918e-06	18.2019307642686	1.42515112582354
TGGT1_214620:E036	TGGT1_214620	E036	0.022625631823484	1.9966617066723e-08	2.17451995841075e-06	44.0045760331166	0.894485048067051
TGGT1_319530:E014	TGGT1_319530	E014	0.0145832608517937	2.05574076950489e-08	2.23564027108948e-06	68.3762767467287	0.69558930900073
TGGT1_239780:E011	TGGT1_239780	E011	0.0107250899188497	2.08318221037069e-08	2.26222812965859e-06	302.116917614103	-0.479574716835177
TGGT1_249860:E015	TGGT1_249860	E015	0.0468203029491223	2.14924358363558e-08	2.33061877386434e-06	21.2346627493503	1.36157432311555
TGGT1_244710:E002	TGGT1_244710	E002	0.00360033576763943	2.15947399446715e-08	2.33809411405351e-06	280.631391187778	0.211158612467632
TGGT1_256780:E004	TGGT1_256780	E004	0.00913536361621941	2.16232407944141e-08	2.33809411405351e-06	152.100382192973	-0.487023873087624
TGGT1_233160:E005	TGGT1_233160	E005	0.0199157482914079	2.17816898479424e-08	2.35186240298169e-06	50.0109444541429	0.829021253704324
TGGT1_266920:E038	TGGT1_266920	E038	0.000828045682234213	2.24021052961394e-08	2.4154007453535e-06	1296.59020074388	0.153980950401909
TGGT1_219430:E012	TGGT1_219430	E012	0.0424643425917707	2.26801353676976e-08	2.44189457458878e-06	23.4160976194726	1.3402883745487
TGGT1_214620:E035	TGGT1_214620	E035	0.0212380180082744	2.2947439393433e-08	2.46715983532639e-06	46.8881280850399	0.836556197709325
TGGT1_229750:E017	TGGT1_229750	E017	0.0285213517007968	2.33528763035593e-08	2.50718337610173e-06	34.8883754280042	1.02707386588052
TGGT1_295070:E018	TGGT1_295070	E018	0.0260405330020832	2.36381898230096e-08	2.53421512511022e-06	38.2200743287443	0.964228104144756
TGGT1_243250:E027	TGGT1_243250	E027	0.0311767439070931	2.40307593338883e-08	2.57265276483561e-06	48.0310418882544	1.00956984925483
TGGT1_307990:E015	TGGT1_307990	E015	0.016320472735383	2.53309244826237e-08	2.70800839355823e-06	69.1056171867474	0.705168853079513
TGGT1_255650:E006	TGGT1_255650	E006	0.0127980213110484	2.55647288201e-08	2.72914312666779e-06	85.8560798262188	0.636447663886662
TGGT1_311335:E004	TGGT1_311335	E004	0.00310117879103699	2.57221632839987e-08	2.74207693276613e-06	326.72666746758	-0.315438658464215
TGGT1_278640:E019	TGGT1_278640	E019	0.0396258409926068	2.67485671496484e-08	2.84747915817567e-06	25.0960935606605	1.26056069299043
TGGT1_226910:E022	TGGT1_226910	E022	0.00956302304270219	2.74076894116731e-08	2.91354146429406e-06	106.009489096624	0.549229927429337
TGGT1_248850:E004	TGGT1_248850	E004	0.043445919189063	2.74941145164466e-08	2.91862382497481e-06	22.8862967285337	1.3173025213762
TGGT1_277030:E029	TGGT1_277030	E029	0.0896645635694644	2.80106129462138e-08	2.96928211458728e-06	11.0810892411631	2.44116448997559
TGGT1_320640:E005	TGGT1_320640	E005	0.0185809947281677	2.97430053530598e-08	3.14850956665962e-06	102.788759853824	0.711687084812915
TGGT1_271430:E018	TGGT1_271430	E018	0.0147509450479224	3.00142424830719e-08	3.17277828721055e-06	67.5957009120344	0.731032635692761
TGGT1_216970:E019	TGGT1_216970	E019	0.110080721244029	3.06580372533864e-08	3.23630694369477e-06	9.02476802805868	2.91982664818112
TGGT1_320300:E021	TGGT1_320300	E021	0.016485649673316	3.08200244275502e-08	3.24886901852594e-06	60.4559640255564	-0.723362295945106
TGGT1_263740:E003	TGGT1_263740	E003	0.00957345621031357	3.13787581230216e-08	3.3031605800198e-06	104.391969816192	0.561594696333195
TGGT1_243450:E015	TGGT1_243450	E015	0.00179347986575409	3.1504329449114e-08	3.31176665983718e-06	573.52592459739	-0.168028615522484
TGGT1_219070:E025	TGGT1_219070	E025	0.0770031550561856	3.1564861029172e-08	3.31352128653733e-06	12.9045957734238	2.06378704997574
TGGT1_309940:E013	TGGT1_309940	E013	0.0472402519233537	3.176015526254e-08	3.32939813460929e-06	21.0456450043586	1.3534099268177
TGGT1_242790B:E027	TGGT1_242790B	E027	0.0263737693482679	3.22924220751349e-08	3.38050671091807e-06	37.7360152449511	0.941477912944785
TGGT1_244270:E002	TGGT1_244270	E002	0.0415218567759941	3.23963373496497e-08	3.38669428708329e-06	23.9484073737391	1.22685704813002
TGGT1_236250:E003	TGGT1_236250	E003	0.0269731234676655	3.28277138403344e-08	3.42705009320464e-06	36.8955647445686	0.999274916800841
TGGT1_295760:E017	TGGT1_295760	E017	0.0560096898947201	3.33545899891326e-08	3.47725051111534e-06	17.7468602743668	1.45476090936243
TGGT1_270530:E023	TGGT1_270530	E023	0.0315042338547834	3.38464517614533e-08	3.52366737883493e-06	31.5785335562284	1.06533791622643
TGGT1_290850:E014	TGGT1_290850	E014	0.0272234480164211	3.64168761340527e-08	3.7860527262228e-06	36.5555254708942	0.997696560475424
TGGT1_206540:E014	TGGT1_206540	E014	0.0101843050078223	3.68642564265983e-08	3.8272997654329e-06	242.34832822102	0.513089487118653
TGGT1_222192:E016	TGGT1_222192	E016	0.0247670652952898	3.69714490025589e-08	3.83118913805737e-06	40.1902197754762	0.902893163423076
TGGT1_319650:E012	TGGT1_319650	E012	0.0320046813552572	3.70030969117234e-08	3.83118913805737e-06	31.0837869195253	1.08287225389074
TGGT1_310530:E017	TGGT1_310530	E017	0.112882560000672	3.71578556434563e-08	3.84194944629783e-06	8.80064215568666	14.6408912657445
TGGT1_210980:E005	TGGT1_210980	E005	0.0184216585095984	3.73403709019397e-08	3.85554632993225e-06	54.0808436659924	0.776242243772014
TGGT1_224210:E014	TGGT1_224210	E014	0.0303626626774192	3.88977461622575e-08	3.99995843596701e-06	49.1747035872705	0.941755885835206
TGGT1_249460:E004	TGGT1_249460	E004	0.0496307825543775	3.88402879393436e-08	3.99995843596701e-06	20.0306808393633	1.45718304015884
TGGT1_297520:E018	TGGT1_297520	E018	0.0532905330726829	3.88935144250573e-08	3.99995843596701e-06	37.8052616071815	1.27945263530844
TGGT1_215990:E010	TGGT1_215990	E010	0.0323108636037456	3.91926755956092e-08	4.02481087889584e-06	30.788663810631	1.06489272971504
TGGT1_240575:E006	TGGT1_240575	E006	0.00563930605517641	3.96912488608879e-08	4.07048028684346e-06	178.032168178728	0.0138076654224776
TGGT1_233430:E012	TGGT1_233430	E012	0.00347917894703234	4.00327714186832e-08	4.09439367979284e-06	290.582038367228	-0.222188610334335
TGGT1_244500:E017	TGGT1_244500	E017	0.00991416674116515	3.99924250199252e-08	4.09439367979284e-06	100.781755266088	0.557388653689518
TGGT1_250220:E038	TGGT1_250220	E038	0.0252848072297049	4.0522993235974e-08	4.13893091183971e-06	39.3652367080505	-0.926066748997359
TGGT1_295760:E035	TGGT1_295760	E035	0.0790438922309055	4.11265742154109e-08	4.19491056997191e-06	12.5711651702944	1.86133066648705
TGGT1_201780:E004	TGGT1_201780	E004	0.000121640229247658	4.1542093955271e-08	4.22829434694496e-06	16725.0839563876	-0.0111584371153561
TGGT1_250720:E027	TGGT1_250720	E027	0.00499258854566935	4.15657524249174e-08	4.22829434694496e-06	201.384946017214	-0.395859031074837
TGGT1_227360:E001	TGGT1_227360	E001	0.00556660593143236	4.18017269230711e-08	4.24658350040264e-06	226.292711025134	-0.407042538999886
TGGT1_226680:E006	TGGT1_226680	E006	0.0105381524412321	4.20270942101458e-08	4.25874453385796e-06	94.7787857235319	0.576627888366461
TGGT1_271350:E010	TGGT1_271350	E010	0.0557612380412455	4.20341274676251e-08	4.25874453385796e-06	17.8260222564913	1.53821848882874
TGGT1_273905:E017	TGGT1_273905	E017	0.0858316965916708	4.30076225254938e-08	4.35154233697708e-06	11.5762813523819	2.22526090818835
TGGT1_217020:E009	TGGT1_217020	E009	0.0222031989427069	4.34291209463702e-08	4.3883152665355e-06	44.8441516417467	0.836338787705018
TGGT1_221390:E002	TGGT1_221390	E002	0.0137959196217685	4.40829082912445e-08	4.44514935594169e-06	72.2962457521665	0.641936431804097
TGGT1_222140:E017	TGGT1_222140	E017	0.0749852172702899	4.41092061199262e-08	4.44514935594169e-06	13.252161827046	2.02914465881156
TGGT1_240970:E014	TGGT1_240970	E014	0.0133575264413955	4.44991745590205e-08	4.4784775120105e-06	86.2487210788042	0.609306381900386
TGGT1_250220:E021	TGGT1_250220	E021	0.0115106503367034	4.48934864803927e-08	4.51215358399075e-06	86.7276722921229	-0.583002340576689
TGGT1_308810B:E002	TGGT1_308810B	E002	0.00945041699622644	4.55512660614858e-08	4.57218564602818e-06	105.760111214424	-0.540185989983733
TGGT1_242880:E009	TGGT1_242880	E009	0.0369307055489687	4.60129558176656e-08	4.61240215730875e-06	26.9306541852732	1.15908018437131
TGGT1_219440:E012	TGGT1_219440	E012	0.0583526105294802	4.60882878409559e-08	4.61383439946375e-06	17.0335433127453	1.55747077978503
TGGT1_285810:E009	TGGT1_285810	E009	0.0496859964547774	4.71939131428409e-08	4.71826764968545e-06	20.0083936754619	1.48152649017276
TGGT1_234280:E011	TGGT1_234280	E011	0.0159255050307265	4.78267091676074e-08	4.77521576262365e-06	62.5907174127914	0.708621585424437
TGGT1_263730:E005	TGGT1_263730	E005	0.0200544898740873	4.80051003142282e-08	4.78670381523746e-06	49.6638794802826	0.827015635311648
TGGT1_264970:E008	TGGT1_264970	E008	0.0198152266311456	4.82336851032682e-08	4.80315993079739e-06	50.2654473367212	0.791668687889204
TGGT1_246740:E005	TGGT1_246740	E005	0.0286667924515871	4.85128699793279e-08	4.82460491944416e-06	34.7109841646129	0.973187373638395
TGGT1_219510:E011	TGGT1_219510	E011	0.0212254056968677	4.93338630415154e-08	4.89980556689069e-06	46.9673201124221	0.85350502271611
TGGT1_217020:E005	TGGT1_217020	E005	0.0221910201147264	5.05583300325186e-08	5.01482900330423e-06	59.162314099974	0.806682572397164
TGGT1_270370:E008	TGGT1_270370	E008	0.0250280344962816	5.18573766539848e-08	5.13021497678204e-06	39.7701080027541	0.897014199914107
TGGT1_318710:E011	TGGT1_318710	E011	0.0332901034455704	5.18078772349363e-08	5.13021497678204e-06	30.7134931427427	1.08273895121072
TGGT1_204510:E007	TGGT1_204510	E007	0.0112843332736934	5.26075585761436e-08	5.19762678732299e-06	88.476723253472	0.557796840551115
TGGT1_311335:E008	TGGT1_311335	E008	0.00360033412164839	5.42318184999155e-08	5.35110875438722e-06	280.631521744312	-0.335182089695205
TGGT1_222350:E017	TGGT1_222350	E017	0.0196241132754039	5.47811167160478e-08	5.39826123028987e-06	50.7565258391254	0.806872032621339
TGGT1_266920:E023	TGGT1_266920	E023	0.00394241687258986	5.6808790310146e-08	5.59078384013211e-06	255.890364747441	0.345154982873085
TGGT1_226850:E019	TGGT1_226850	E019	0.0237968409411325	5.75500482847672e-08	5.65636898499255e-06	41.8331202555119	0.890958375763597
TGGT1_273310:E005	TGGT1_273310	E005	0.0156558448868685	5.78715298455181e-08	5.6805791802389e-06	63.6731008452862	0.670281884913514
TGGT1_244290:E027	TGGT1_244290	E027	0.0192163350050479	5.858020540214e-08	5.74268363774909e-06	57.8474987182051	-0.777424112922821
TGGT1_201150:E007	TGGT1_201150	E007	0.035723240936866	5.90151122888992e-08	5.77782411531034e-06	27.8425142798647	1.13811756940418
TGGT1_271430:E023	TGGT1_271430	E023	0.0146238932322103	5.95383503999512e-08	5.82151047856288e-06	68.1854812722657	0.700302812211734
TGGT1_273310:E003	TGGT1_273310	E003	0.010044795570285	5.98706385096042e-08	5.84643746748437e-06	99.4629498204994	0.509660810317648
TGGT1_268280:E028	TGGT1_268280	E028	0.00762450597934454	6.03437844052317e-08	5.88503730698867e-06	131.296034264348	0.47454058724454
TGGT1_206540:E002	TGGT1_206540	E002	0.022257535041205	6.22969254881789e-08	6.06768843073136e-06	164.434354818879	0.727002042027259
TGGT1_288860:E026	TGGT1_288860	E026	0.0328238258771048	6.31693776439414e-08	6.14474633344193e-06	30.3065919157819	1.11597744154978
TGGT1_310100:E027	TGGT1_310100	E027	0.0768378454793589	6.38826915532382e-08	6.20614600639698e-06	12.9323813469979	2.29663565544816
TGGT1_257370:E003	TGGT1_257370	E003	0.0219336866002985	6.58997093593344e-08	6.39387911783981e-06	45.3967475367939	0.841340461388555
TGGT1_235340:E012	TGGT1_235340	E012	0.0095046327804615	6.96420083658333e-08	6.74831061064924e-06	105.15286168922	0.558887351952691
TGGT1_257150:E007	TGGT1_257150	E007	0.00779682959339291	6.99922175234791e-08	6.7735618244041e-06	136.98371934928	0.469544951639707
TGGT1_229740:E009	TGGT1_229740	E009	0.027031256278312	7.31945040144653e-08	7.07440793148506e-06	36.8160347525047	0.951349664710469
TGGT1_202040:E007	TGGT1_202040	E007	0.0106683981525331	7.33840847414823e-08	7.07463761853407e-06	93.614879741082	0.557198872071291
TGGT1_320740:E014	TGGT1_320740	E014	0.00208967137752058	7.33160546837529e-08	7.07463761853407e-06	489.736932996428	0.224574710830898
TGGT1_233540:E013	TGGT1_233540	E013	0.027480242289808	7.36464407460987e-08	7.09088571270272e-06	36.2131496320553	0.948528663623827
TGGT1_221330:E006	TGGT1_221330	E006	0.00284360805616755	7.55832929046338e-08	7.26811252457765e-06	356.983821714512	-0.286439984086967
TGGT1_304955:E017	TGGT1_304955	E017	0.0119680888646135	7.83222240661874e-08	7.5219191097466e-06	547.484231223729	0.518492845458252
TGGT1_295760:E018	TGGT1_295760	E018	0.0571943073111215	8.09234106197457e-08	7.76186957038277e-06	17.3788838719582	1.44280832471572
TGGT1_305200:E013	TGGT1_305200	E013	0.144174502063189	8.38452037976534e-08	8.03192419953643e-06	6.8897065621324	13.5195312229535
TGGT1_236790:E015	TGGT1_236790	E015	0.0157611302129596	8.62723775405726e-08	8.2539732142678e-06	63.2460733308214	0.694880599670857
TGGT1_243545:E004	TGGT1_243545	E004	0.00135606803178878	8.66619002033251e-08	8.2807582062803e-06	767.426333080159	-0.186517034026521
TGGT1_259040:E008	TGGT1_259040	E008	0.0213404401165064	8.87918340654718e-08	8.47356616456627e-06	46.6624328303365	0.80796339344053
TGGT1_236200:E023	TGGT1_236200	E023	0.0154840112546338	8.9268397150758e-08	8.49758689351208e-06	64.3825657140007	0.675432971534515
TGGT1_285990:E014	TGGT1_285990	E014	0.0830093186222102	8.92378852508738e-08	8.49758689351208e-06	11.970178952239	2.01019584596705
TGGT1_240070:E001	TGGT1_240070	E001	0.00252431876240205	9.04616046415333e-08	8.60033836731619e-06	403.279142334735	-0.172038712077886
TGGT1_250220:E022	TGGT1_250220	E022	0.0237977144537608	9.28648138625383e-08	8.8066604283041e-06	41.831580711293	-0.862208162426337
TGGT1_263180:E005	TGGT1_263180	E005	0.0762364586629857	9.2772546481348e-08	8.8066604283041e-06	13.0344810776029	1.84973263680591
TGGT1_320450:E004	TGGT1_320450	E004	0.0384721514699111	9.4357988718742e-08	8.93704950293227e-06	25.8498866667354	1.12672056899964
TGGT1_255215:E001	TGGT1_255215	E001	0.0113768121756779	9.59384550038352e-08	9.07536959461811e-06	87.7535624222406	-0.569101529512576
TGGT1_226500:E006	TGGT1_226500	E006	0.012646681686166	9.78016554225825e-08	9.24005590018704e-06	78.8985107058931	-0.607289858578536
TGGT1_250220:E006	TGGT1_250220	E006	0.00479537727775107	1.00326670132276e-07	9.46677950304326e-06	947.038673727706	0.323512767721483
TGGT1_202810:E002	TGGT1_202810	E002	0.0139877019351482	1.01429151594124e-07	9.55887548103128e-06	71.6580134554185	0.560420550259618
TGGT1_313930:E018	TGGT1_313930	E018	0.00524134716919865	1.05646208975441e-07	9.94390008316532e-06	191.712124538765	0.382719381849574
TGGT1_257300:E018	TGGT1_257300	E018	0.0232375690375922	1.07783684243845e-07	1.0132470674774e-05	42.8426474100161	0.838535135580294
TGGT1_232350:E004	TGGT1_232350	E004	0.0229622026790241	1.09667766940346e-07	1.0296781566317e-05	43.3578203789716	-0.857054880549597
TGGT1_225150:E023	TGGT1_225150	E023	0.00548823818875373	1.12054127259028e-07	1.05077854174837e-05	182.988880585471	0.392039012472739
TGGT1_278510:E005	TGGT1_278510	E005	0.00378680684259146	1.15350886330247e-07	1.08035324542909e-05	266.581401207953	0.332730139966525
TGGT1_310270:E008	TGGT1_310270	E008	0.0386248657122903	1.1651365517262e-07	1.08989295609616e-05	25.7475168370743	1.15023662117113
TGGT1_275990:E016	TGGT1_275990	E016	0.0261187606562799	1.17073656325097e-07	1.09377763811662e-05	38.1053287417855	0.916286259802993
TGGT1_203930:E006	TGGT1_203930	E006	0.0056575765692666	1.18005501873665e-07	1.10112244970559e-05	177.450834159541	0.394278938843319
TGGT1_300310:E008	TGGT1_300310	E008	0.0583549640039678	1.18573613065921e-07	1.10369837718576e-05	17.0328556105617	1.52185758107871
TGGT1_321360:E013	TGGT1_321360	E013	0.0290078286845314	1.18457881647641e-07	1.10369837718576e-05	34.3020196877601	1.01456408864771
TGGT1_313480:E025	TGGT1_313480	E025	0.0207485874019568	1.18848849746037e-07	1.10489960166113e-05	47.9974840855237	0.802886407698496
TGGT1_207770:E014	TGGT1_207770	E014	0.0313708928815356	1.2300309110656e-07	1.1421154339086e-05	31.7130240787369	1.01970800293525
TGGT1_243250:E035	TGGT1_243250	E035	0.013290649356379	1.29241512364889e-07	1.19856834203227e-05	75.0576691802177	0.636981990678809
TGGT1_221670:E013	TGGT1_221670	E013	0.0271185687252813	1.31229202869193e-07	1.2155104915759e-05	36.6972269772518	0.939153655295002
TGGT1_301390:E004	TGGT1_301390	E004	0.0368810778749837	1.33178406174597e-07	1.23205511572686e-05	26.9669537283407	1.08335865160172
TGGT1_284040:E025	TGGT1_284040	E025	0.0450193258020068	1.34337889522163e-07	1.24126239191493e-05	22.0853222460961	1.28328847782094
TGGT1_205320:E002	TGGT1_205320	E002	0.0120125742671318	1.3615846908821e-07	1.25654815758548e-05	83.0850276492475	-0.58936998952111
TGGT1_253360:E007	TGGT1_253360	E007	0.0166827591309348	1.43997477061894e-07	1.3272704038161e-05	59.7389907967838	0.690893913779677
TGGT1_215090:E004	TGGT1_215090	E004	0.0706040192716802	1.46486076925978e-07	1.34856402755412e-05	14.0752254661668	1.64309951044393
TGGT1_230220:E012	TGGT1_230220	E012	0.0577638464770524	1.46923210321656e-07	1.35094283242475e-05	17.207346862721	1.45363311375847
TGGT1_215080:E008	TGGT1_215080	E008	0.0281434778253667	1.47716227912746e-07	1.35658419661011e-05	35.3578498177535	0.946500998058186
No_genes_on_ref_contig_276+No_genes_on_ref_contig_275+No_genes_on_ref_contig_274:E003	No_genes_on_ref_contig_276+No_genes_on_ref_contig_275+No_genes_on_ref_contig_274	E003	0.000498351126168632	1.48864279582766e-07	1.36546844410493e-05	2276.87450803733	-0.0559344699993607
TGGT1_284050:E030	TGGT1_284050	E030	0.0366897722421677	1.49835202686009e-07	1.37270839871684e-05	27.1078022851732	1.09558625588791
TGGT1_242790B:E034	TGGT1_242790B	E034	0.130789225959679	1.50391213616461e-07	1.37613422609677e-05	7.59515118409639	2.88922226098524
TGGT1_293470:E006	TGGT1_293470	E006	0.00672779071985414	1.5199805734078e-07	1.38915564328064e-05	148.9593569131	0.409053085094972
No_genes_on_ref_contig_276+No_genes_on_ref_contig_275+No_genes_on_ref_contig_274:E004	No_genes_on_ref_contig_276+No_genes_on_ref_contig_275+No_genes_on_ref_contig_274	E004	0.000834736800545051	1.52640005879095e-07	1.39314011843196e-05	11373.8123479615	0.0734312492790381
TGGT1_278490:E011	TGGT1_278490	E011	0.0189941765746329	1.52802672353218e-07	1.39314011843196e-05	52.4453893719176	0.72796046197142
TGGT1_314810:E002	TGGT1_314810	E002	0.0185557227185861	1.57730865474628e-07	1.43633906919318e-05	232.087947443987	-0.633614864343365
TGGT1_273070:E019	TGGT1_273070	E019	0.0199262675274681	1.60449124406514e-07	1.45933402176813e-05	49.9844605070917	0.779930146725999
TGGT1_215030:E002	TGGT1_215030	E002	0.0427152554989203	1.6083379642869e-07	1.46107451943188e-05	23.2783487203718	1.26929256429094
TGGT1_253360:E012	TGGT1_253360	E012	0.0510376595929758	1.67808973190786e-07	1.52260958123721e-05	20.4128362312987	1.32530697726623
TGGT1_264460:E014	TGGT1_264460	E014	0.0213419436260756	1.74024833324164e-07	1.57711570171546e-05	46.659135908048	0.777459033136466
TGGT1_248670:E009	TGGT1_248670	E009	0.00279778182706693	1.79610035653449e-07	1.62578272033042e-05	362.964147312029	-0.272857498849604
TGGT1_260340:E014	TGGT1_260340	E014	0.00828147944430118	1.90027419576986e-07	1.71802062517557e-05	120.801343498033	-0.383704700848419
TGGT1_282055:E009	TGGT1_282055	E009	0.0040938903033636	1.98442280940473e-07	1.79195513477214e-05	246.276205883469	-0.343420859316821
TGGT1_219280:E013	TGGT1_219280	E013	0.0336989803674035	1.98699157729713e-07	1.79213362046864e-05	29.5180797950938	1.03183100847845
TGGT1_250330:E012	TGGT1_250330	E012	0.0162085836102351	2.00430028683422e-07	1.80399809235732e-05	61.4933711624266	0.675141506658713
TGGT1_254490:E005	TGGT1_254490	E005	0.0228945350753012	2.00491968667163e-07	1.80399809235732e-05	43.4863192563802	0.834394922270584
TGGT1_291350:E020	TGGT1_291350	E020	0.035760255694717	2.05786903318318e-07	1.84943944430501e-05	27.8136447500024	1.0958406974913
TGGT1_213770:E017	TGGT1_213770	E017	0.0688497585252903	2.07190483094416e-07	1.85984217259408e-05	14.4341805291013	1.65109971171577
TGGT1_239820:E028	TGGT1_239820	E028	0.00552913312245929	2.08982199411838e-07	1.87370018931738e-05	468.30263370394	0.348393815788085
TGGT1_232370:E006	TGGT1_232370	E006	0.0224313446103203	2.10319845037221e-07	1.88345906725157e-05	44.3867790721972	-0.820222807225495
TGGT1_311335:E039	TGGT1_311335	E039	0.00946812084135822	2.11408066147797e-07	1.89096384089737e-05	239.319100608526	0.46620407689417
TGGT1_285240:E014	TGGT1_285240	E014	0.0276741192995289	2.13234430540386e-07	1.90504547625336e-05	35.9588784197143	0.931477082401666
TGGT1_293540:E006	TGGT1_293540	E006	0.0055183425635173	2.14322815334218e-07	1.91250850396586e-05	181.979221958117	0.366623992947945
TGGT1_309370:E011	TGGT1_309370	E011	0.0242464610764138	2.14722199452476e-07	1.91381288667654e-05	41.0553800821533	0.850778643609196
TGGT1_271430:E024	TGGT1_271430	E024	0.0121651280475121	2.17884073439045e-07	1.9397071894782e-05	82.0377593023793	0.608300814321042
TGGT1_311920:E010	TGGT1_311920	E010	0.0277325723273711	2.21111409684482e-07	1.96381228751733e-05	35.8829159070909	0.966484865672202
TGGT1_318330:E007	TGGT1_318330	E007	0.0383157563535315	2.21025680357799e-07	1.96381228751733e-05	25.9555710613241	1.13584525063506
TGGT1_262140:E023	TGGT1_262140	E023	0.00150053748021155	2.22153808257057e-07	1.97075459339025e-05	690.340509746522	-0.164034198144735
TGGT1_215990:E012	TGGT1_215990	E012	0.061301505149878	2.27150984631933e-07	2.0127228277199e-05	16.2133154294909	1.48536481115231
TGGT1_278470:E014	TGGT1_278470	E014	0.012536144865771	2.29487106467068e-07	2.03104150831311e-05	79.5976674628642	0.585561428343974
TGGT1_271430:E021	TGGT1_271430	E021	0.0117229206738634	2.30160091240086e-07	2.03461520656236e-05	85.1488821876883	0.58929258478991
TGGT1_319950:E008	TGGT1_319950	E008	0.021646469314536	2.34955240156735e-07	2.07457791606617e-05	46.0008345056725	0.802249212828292
TGGT1_271930:E002	TGGT1_271930	E002	0.0097823173253924	2.3811398256607e-07	2.10001528941758e-05	102.148829081411	0.520885759661367
TGGT1_239910:E015	TGGT1_239910	E015	0.00455776782881135	2.41532028229038e-07	2.1276775941267e-05	3663.45384777314	0.158383876795968
TGGT1_297180:E004	TGGT1_297180	E004	0.0225163136645669	2.49092789684357e-07	2.19172656925763e-05	44.2188136264298	0.845843582548662
TGGT1_255650:E004	TGGT1_255650	E004	0.0108950550993953	2.5210038535383e-07	2.2156106192806e-05	91.6561524029611	0.540995259690431
TGGT1_309220:E012	TGGT1_309220	E012	0.0100096558539605	2.52547472329312e-07	2.21696202713055e-05	99.8143086193618	-0.530747028113924
TGGT1_320430:E017	TGGT1_320430	E017	0.0903500480108975	2.53534830058574e-07	2.22304750875721e-05	10.9969591978251	1.94608244723423
TGGT1_200290:E010	TGGT1_200290	E010	0.0207385164390763	2.54387509221208e-07	2.2279393652326e-05	48.0208626516182	-0.832895350642079
TGGT1_221870:E010	TGGT1_221870	E010	0.0157265991715026	2.54782304487553e-07	2.22881436779841e-05	63.3854954172969	0.681928656948608
TGGT1_283780:E017	TGGT1_283780	E017	0.0139395524989601	2.59764610119027e-07	2.26977211121575e-05	71.5479637007463	0.61483168263374
TGGT1_263320:E005	TGGT1_263320	E005	0.00459167710282368	2.66905639379369e-07	2.32947598563181e-05	1931.56332029647	-0.199070142412827
TGGT1_297180:E003	TGGT1_297180	E003	0.00165687994699054	2.71318844907182e-07	2.36526193030849e-05	959.454614032612	-0.164871193603536
TGGT1_276170:E016	TGGT1_276170	E016	0.0410083899781063	2.76035760792129e-07	2.4036100083169e-05	65.0467511732012	0.961184587099672
TGGT1_254230:E006	TGGT1_254230	E006	0.0273788390213767	2.78317510141237e-07	2.42068976426869e-05	36.3475783878022	0.903763083304428
TGGT1_256780:E009	TGGT1_256780	E009	0.0113932837283022	2.83023102430581e-07	2.45878760090898e-05	87.6259976628371	0.5533987451538
TGGT1_244300:E004	TGGT1_244300	E004	0.104867239898879	2.83503611713924e-07	2.4601343261265e-05	9.4737015278838	2.3885661435929
TGGT1_313180:E016	TGGT1_313180	E016	0.0338315451655621	2.86622731627765e-07	2.4843485437947e-05	41.0675273253926	0.982265732709892
TGGT1_219070:E042	TGGT1_219070	E042	0.00649251902400108	2.87246669966168e-07	2.4869046746143e-05	154.409526387851	-0.418302280111452
TGGT1_313180:E017	TGGT1_313180	E017	0.0297445854766702	2.93501789182655e-07	2.53815242906218e-05	52.3624521926047	0.897465757044757
TGGT1_297500:E021	TGGT1_297500	E021	0.0339643462059721	2.93861193900694e-07	2.53835620084597e-05	29.2870293110264	1.02487460127633
TGGT1_203540:E016	TGGT1_203540	E016	0.00204707824804942	2.948529882289e-07	2.54111500072026e-05	500.246502161301	-0.218158110907974
TGGT1_275320:E041	TGGT1_275320	E041	0.00827266454730666	2.94743519614805e-07	2.54111500072026e-05	120.9310390958	0.474700045337183
TGGT1_290730:E010	TGGT1_290730	E010	0.0153136155156946	3.00660130752566e-07	2.58821116202055e-05	65.1018805008035	0.64131766525864
TGGT1_240755:E003	TGGT1_240755	E003	0.00845993160046397	3.03532356218245e-07	2.6099638848336e-05	147.038421959023	0.375050634070218
TGGT1_262860:E007	TGGT1_262860	E007	0.0161741045323067	3.05758553343569e-07	2.62611852031973e-05	63.3443506243268	0.651356645401467
TGGT1_289200:E033	TGGT1_289200	E033	0.0252567815208231	3.0790707786251e-07	2.6415701202048e-05	49.6037352784313	-0.78719379427756
TGGT1_239700:E042	TGGT1_239700	E042	0.037998564936652	3.17048796630441e-07	2.71691407561473e-05	26.1725897614126	1.10768130061285
TGGT1_311800:E010	TGGT1_311800	E010	0.0205816329698565	3.21673156710125e-07	2.75342021862567e-05	48.3880125148638	0.756193904736192
TGGT1_319900:E009	TGGT1_319900	E009	0.0820654021606677	3.26072736417404e-07	2.7879218963688e-05	24.4360612030262	1.57916015889971
TGGT1_233860:E011	TGGT1_233860	E011	0.026108478445561	3.26706245025261e-07	2.7901820803954e-05	38.1203715106173	0.877455881396542
TGGT1_262400:E015	TGGT1_262400	E015	0.02173459246628	3.27466451541474e-07	2.79351798424466e-05	435.752824585994	0.631016943403269
TGGT1_217020:E012	TGGT1_217020	E012	0.0150034222164205	3.3828903405651e-07	2.88258870034489e-05	66.4534612466323	0.638915539205491
TGGT1_272320:E013	TGGT1_272320	E013	0.0475988242682349	3.47262658829077e-07	2.95572142788505e-05	20.8868958656211	1.31713993315899
TGGT1_283890:E008	TGGT1_283890	E008	0.068282721479275	3.48774371562384e-07	2.96524910589743e-05	14.5541550454411	1.75744201933358
TGGT1_248440:E004	TGGT1_248440	E004	0.00207548138970664	3.59018364761795e-07	3.04891303881191e-05	493.188819811347	0.109810239947948
TGGT1_222800:E028	TGGT1_222800	E028	0.0944906174147197	3.78778475902698e-07	3.21311276831399e-05	10.5147557454217	2.10123706098238
TGGT1_249240:E005	TGGT1_249240	E005	0.00307175641003915	3.7934432412953e-07	3.21430523613881e-05	361.307650754655	0.271796287691706
TGGT1_227790:E012	TGGT1_227790	E012	0.0224049208902049	3.80304525761766e-07	3.21883277336235e-05	44.4392734734824	0.774519383470801
TGGT1_289190:E022	TGGT1_289190	E022	0.0678880418723544	3.81543418791129e-07	3.22570633994084e-05	14.6388459887882	1.691315934059
TGGT1_242030:E007	TGGT1_242030	E007	0.0311434838367974	3.95359523727421e-07	3.33877804719172e-05	31.9450558672846	0.969274369248266
TGGT1_230010:E010	TGGT1_230010	E010	0.0400396052050319	3.97456635055962e-07	3.35274189629461e-05	24.8363497184687	1.13690886710117
TGGT1_200330:E005	TGGT1_200330	E005	0.0215104217716107	4.03704642980907e-07	3.40165042650868e-05	46.2926219747619	0.781080017066823
TGGT1_246340:E017	TGGT1_246340	E017	0.0864481339008803	4.08353120995029e-07	3.43698725958199e-05	11.4936746409839	1.8852908730708
TGGT1_229780:E015	TGGT1_229780	E015	0.0259433947814765	4.24495679942259e-07	3.56888014253569e-05	38.3635236857093	0.863988586875918
TGGT1_263330:E006	TGGT1_263330	E006	0.0281337449982359	4.28518234802216e-07	3.59869613586901e-05	42.4882245296342	0.827330447308879
TGGT1_201680:E010	TGGT1_201680	E010	0.0315124668624725	4.31233018388792e-07	3.61747547123881e-05	31.5702669513862	0.970720317814856
TGGT1_223800:E012	TGGT1_223800	E012	0.0270546283382267	4.34028682147864e-07	3.63689089291572e-05	36.7841565922538	0.87925479769888
TGGT1_253430:E017	TGGT1_253430	E017	0.000970074831230803	4.38077503244693e-07	3.66675236436771e-05	1093.73317656481	0.15814934429719
TGGT1_257180:E024	TGGT1_257180	E024	0.0846615315844772	4.40661086206321e-07	3.68429714796971e-05	11.7364028460547	1.93140246257433
TGGT1_207910:E007	TGGT1_207910	E007	0.0128699698873694	4.49185220217897e-07	3.7514162778463e-05	77.5230011796834	0.573813685462887
TGGT1_226870A:E009	TGGT1_226870A	E009	0.0239098165298519	4.51253388673798e-07	3.764529097433e-05	41.6349396022513	0.818133135620868
TGGT1_242790A:E006	TGGT1_242790A	E006	0.155574236144389	4.71083512008295e-07	3.92562668187552e-05	6.38465973453205	2.91644027975102
TGGT1_225200:E003	TGGT1_225200	E003	0.0812530980458324	4.8038167375574e-07	3.99750972494547e-05	12.2291032216488	1.77904935371285
TGGT1_291120:E010	TGGT1_291120	E010	0.0816325547980035	4.80767423457361e-07	3.99750972494547e-05	12.1722146613374	1.74277812777274
TGGT1_281520:E002	TGGT1_281520	E002	0.0174962458426095	4.82212463772895e-07	4.00511894910802e-05	56.9515090921438	0.673951027774348
TGGT1_306310:E004	TGGT1_306310	E004	0.109843417583182	4.9688179186843e-07	4.12242805631171e-05	9.0442760276844	2.72461823367251
TGGT1_252380:E018	TGGT1_252380	E018	0.0261714702106174	5.03877412202829e-07	4.17588405363094e-05	38.0284012506049	0.878059187116416
TGGT1_214770:E002	TGGT1_214770	E002	0.00817008415725881	5.04669799870045e-07	4.17786996865035e-05	122.461064370041	0.443931490278565
TGGT1_228630:E003	TGGT1_228630	E003	0.0358794110383954	5.06081536689579e-07	4.18497316258991e-05	27.7211151747266	1.01237967444701
TGGT1_286120:E017	TGGT1_286120	E017	0.0167365338721025	5.12362045545504e-07	4.23227848376178e-05	59.5463316349349	0.67344894005897
TGGT1_263730:E007	TGGT1_263730	E007	0.0184776644133444	5.21844091561859e-07	4.30589739393323e-05	53.9163700058297	0.724673012063584
TGGT1_268960:E012	TGGT1_268960	E012	0.0137761900614813	5.24935491890312e-07	4.32668204449875e-05	72.4002549367849	0.602191014365452
TGGT1_246330:E006	TGGT1_246330	E006	0.0280601375981286	5.34334357470789e-07	4.39456576782994e-05	35.4630982527835	0.853595274858576
TGGT1_253820:E008	TGGT1_253820	E008	0.0026593024936543	5.34236084674794e-07	4.39456576782994e-05	382.31820897899	0.250717240285261
TGGT1_286410:E007	TGGT1_286410	E007	0.0104171804218827	5.39521600280297e-07	4.43240452091146e-05	95.8860465305476	0.517719655092469
TGGT1_244165:E029	TGGT1_244165	E029	0.0108320466003559	5.41325798763677e-07	4.44239810229709e-05	92.1923862920657	0.516137122172673
TGGT1_319860:E024	TGGT1_319860	E024	0.0665720046304237	5.47042536396871e-07	4.48444349088376e-05	64.2874910745571	1.17350798634889
TGGT1_285230:E005	TGGT1_285230	E005	0.0593668708514056	5.48551127058162e-07	4.49193838410726e-05	16.7422261419242	1.39332678516728
TGGT1_305520:E009	TGGT1_305520	E009	0.0224449994660285	5.52900852961389e-07	4.52265717191858e-05	118.221411496191	-0.69544243156675
TGGT1_290290:E016	TGGT1_290290	E016	0.018405987817214	5.61365684381923e-07	4.58693417913022e-05	54.1270439236215	0.709542671781832
TGGT1_239700:E041	TGGT1_239700	E041	0.0329037714440885	5.62801578271098e-07	4.59370074394019e-05	30.232817029577	0.976256330203769
TGGT1_262530:E013	TGGT1_262530	E013	0.0208582195043368	5.64323277894021e-07	4.60115231820775e-05	47.7444508534861	0.75229604530751
TGGT1_248640:E012	TGGT1_248640	E012	0.0407331008466596	5.75547085873353e-07	4.68760774186205e-05	24.4128545014063	1.12093070087155
TGGT1_297180:E001	TGGT1_297180	E001	0.00163525862977688	5.76451299895771e-07	4.68991842289798e-05	983.941347340997	-0.158495109959965
TGGT1_299110:E014	TGGT1_299110	E014	0.0409636466801949	6.09858637173896e-07	4.95638016289004e-05	28.0899918431498	1.0732943908316
TGGT1_243740:E011	TGGT1_243740	E011	0.0341468254112774	6.33840279606856e-07	5.14574822913484e-05	29.1302347003781	0.727864349677016
TGGT1_219070:E043	TGGT1_219070	E043	0.00328361486500394	6.35475302466676e-07	5.15234010673455e-05	308.222960876726	-0.282120338833068
TGGT1_232340:E004	TGGT1_232340	E004	0.0382467384716307	6.36015628004464e-07	5.15234010673455e-05	29.9462686664927	1.02109195284771
TGGT1_293230:E006	TGGT1_293230	E006	0.0250078276825996	6.38717799729106e-07	5.16869044316117e-05	39.8023232504139	0.838820969177722
TGGT1_305040:E015	TGGT1_305040	E015	0.0213820765720166	6.39869793435447e-07	5.17247473020727e-05	46.5713035443402	0.782250099983984
TGGT1_249390:E035	TGGT1_249390	E035	0.0073312463432731	6.4979400544388e-07	5.24708659395933e-05	136.593045988755	0.435015334003655
TGGT1_203380:E024	TGGT1_203380	E024	0.017896763052068	6.50738429365833e-07	5.24910479918125e-05	55.6725231612233	0.704530144180603
TGGT1_221670:E016	TGGT1_221670	E016	0.0359312577427997	6.5515540551549e-07	5.27909977182002e-05	27.6810457791571	1.0294195285592
TGGT1_257390:E009	TGGT1_257390	E009	0.0345261012168499	6.57587833186472e-07	5.29305682725239e-05	28.8096552872046	1.10284714751977
TGGT1_300048:E002	TGGT1_300048	E002	0.00724284784809518	6.59318614372397e-07	5.30134250122282e-05	138.274613702059	0.416211695452402
TGGT1_299200:E006	TGGT1_299200	E006	0.0275680537457206	6.6082692344486e-07	5.30782364801375e-05	112.583795910112	0.718645514372843
TGGT1_204070:E016	TGGT1_204070	E016	0.0118228092499076	6.64587792363133e-07	5.33236459897987e-05	84.4256667024029	0.541871126554932
TGGT1_262530:E023	TGGT1_262530	E023	0.0264478519233426	6.66294814366451e-07	5.34039179845653e-05	37.6300641348201	0.852387408581005
TGGT1_212260:E006	TGGT1_212260	E006	0.00716981179715517	6.67321709716405e-07	5.3429565109942e-05	194.494374773579	0.389103233768121
TGGT1_200290:E007	TGGT1_200290	E007	0.00533543966454092	6.71710660063854e-07	5.37240583163452e-05	188.291280924253	-0.39542152431336
TGGT1_313010:E004	TGGT1_313010	E004	0.0298362913369445	6.78438620386865e-07	5.42048074060043e-05	33.3475652484071	0.913225017584064
TGGT1_225330:E005	TGGT1_225330	E005	0.0178331580368424	6.95612753983006e-07	5.551827156446e-05	55.8717845961232	0.670250367452075
TGGT1_273140:E005	TGGT1_273140	E005	0.0364779969054365	6.98395108333256e-07	5.56815391118609e-05	27.2654474898514	1.03722390364192
TGGT1_210840:E002	TGGT1_210840	E002	0.0904689708019421	7.1410603147749e-07	5.68741433837004e-05	10.9824935759258	1.87772335866738
TGGT1_311920:E020	TGGT1_311920	E020	0.0588400023634592	7.22098179308962e-07	5.73897209132807e-05	29.5089972298512	1.25455620455768
TGGT1_320640:E016	TGGT1_320640	E016	0.0315115050826525	7.21464838761544e-07	5.73897209132807e-05	31.5712324327491	0.968936860542791
TGGT1_249790:E009	TGGT1_249790	E009	0.0107421704190589	7.6216133798426e-07	6.05101662263932e-05	92.9682271765344	0.522893563233195
TGGT1_224510:E017	TGGT1_224510	E017	0.170169237591681	7.68755887661824e-07	6.09696825826401e-05	5.83686253350103	15.1142250953734
TGGT1_291600:E005	TGGT1_291600	E005	0.0104159586910567	7.82070086911821e-07	6.19606093385422e-05	95.8973610482234	0.502724517665922
TGGT1_242070:E014	TGGT1_242070	E014	0.000413460964479088	7.84571926503489e-07	6.20937333497243e-05	2827.25004107886	-0.0426981024168861
TGGT1_269240:E006	TGGT1_269240	E006	0.0355425269495636	7.88201427890682e-07	6.23157325552652e-05	27.9843264563361	0.939136248604431
TGGT1_257040:E003	TGGT1_257040	E003	0.00716721370212684	7.92163655332045e-07	6.25635458697039e-05	586.967873826185	-0.345483534872181
TGGT1_263740:E004	TGGT1_263740	E004	0.00451378008842501	8.09718829360145e-07	6.38832657209797e-05	223.046116821931	0.335509340373932
TGGT1_311335:E019	TGGT1_311335	E019	0.00302168184005519	8.16741746096983e-07	6.43701508378542e-05	335.503349401668	-0.264236854535648
TGGT1_265520:E007	TGGT1_265520	E007	0.00312105834792841	8.19019567240523e-07	6.44824343033054e-05	324.60321499781	-0.270361930294212
TGGT1_213040:E012	TGGT1_213040	E012	0.0507863352413346	8.23474939461382e-07	6.47657470076693e-05	19.5743587924534	1.23939188803389
TGGT1_318260:E003	TGGT1_318260	E003	0.0441085619005665	8.29745197611145e-07	6.51910618771783e-05	22.5419898927964	1.12712069495513
TGGT1_248880:E016	TGGT1_248880	E016	0.00808945283488293	8.56025371900462e-07	6.71859913385054e-05	123.691160124478	0.452849210254892
TGGT1_255350:E004	TGGT1_255350	E004	0.038724292370797	9.31995486515745e-07	7.30727000641422e-05	25.6813022490085	1.02336791838304
TGGT1_205615:E014	TGGT1_205615	E014	0.0525048110539414	9.34579343123831e-07	7.31993532766688e-05	18.932931726434	1.26557285504324
TGGT1_230010:E014	TGGT1_230010	E014	0.0411513023011296	9.58426696898394e-07	7.49894478312365e-05	24.1643820528357	1.10611006543057
TGGT1_320640:E017	TGGT1_320640	E017	0.0321213106285504	9.65186408259641e-07	7.54402472689557e-05	30.9707055559861	0.951634393589245
TGGT1_233260:E015	TGGT1_233260	E015	0.0819656715764021	9.74520881170332e-07	7.60911541741901e-05	12.1227079363906	1.56519982882439
TGGT1_208050:E025	TGGT1_208050	E025	0.0484407330081859	9.81252421836363e-07	7.64587840693154e-05	20.5234105283643	1.21478062952527
TGGT1_267430:E017	TGGT1_267430	E017	0.0224327317304654	9.81077953290548e-07	7.64587840693154e-05	44.3840267906609	-0.773930323875249
TGGT1_217020:E002	TGGT1_217020	E002	0.0110114515911946	9.96625382937932e-07	7.73737909348431e-05	90.6817910565904	0.520198631951385
TGGT1_226850:E031	TGGT1_226850	E031	0.0129088235282251	9.99877602345157e-07	7.73737909348431e-05	77.2885373621038	0.558954124029012
TGGT1_246950:E005	TGGT1_246950	E005	0.0143722332998896	9.99797608671092e-07	7.73737909348431e-05	69.3846149847728	0.584007934787649
TGGT1_278470:E012	TGGT1_278470	E012	0.014281285838376	9.99977367127493e-07	7.73737909348431e-05	69.8284119975169	0.597877110738717
TGGT1_297970:E010	TGGT1_297970	E010	0.034072784132202	9.97319692473299e-07	7.73737909348431e-05	40.5084283666475	0.898668514892152
TGGT1_304740:E007	TGGT1_304740	E007	0.0127324591709259	1.00016133131356e-06	7.73737909348431e-05	78.3643656904732	0.56848193235373
TGGT1_313690:E014	TGGT1_313690	E014	0.0106800451487918	9.94913870044016e-07	7.73737909348431e-05	93.5121903700194	0.497879705863626
TGGT1_314900:E025	TGGT1_314900	E025	0.0163570628297403	1.01557111306528e-06	7.84855785968301e-05	60.9330393700703	0.638787157235718
TGGT1_218490:E012	TGGT1_218490	E012	0.0276720012716843	1.01680934304002e-06	7.85010048678759e-05	35.9616369369334	0.889598555708052
TGGT1_318290:E011	TGGT1_318290	E011	0.0207471244908548	1.03177641031273e-06	7.95752292288332e-05	48.000878649833	0.726278369300825
TGGT1_275320:E039	TGGT1_275320	E039	0.00726772076345899	1.04487732712329e-06	8.05034843411137e-05	160.872410964993	0.407636853989728
TGGT1_217020:E004	TGGT1_217020	E004	0.03056258034008	1.05751768248202e-06	8.13944006897717e-05	52.7846623568509	0.82210430816053
TGGT1_263100:E016	TGGT1_263100	E016	0.0269020692390351	1.06032763489052e-06	8.15276534082355e-05	36.993240078991	0.855632580469158
TGGT1_256030:E002	TGGT1_256030	E002	0.00298209173870736	1.06773755594373e-06	8.20139633672141e-05	340.052474264678	0.257752919010044
TGGT1_280700:E015	TGGT1_280700	E015	0.0142698535736984	1.06962324952542e-06	8.20753953762747e-05	69.8846000999008	0.601010872433052
TGGT1_240700:E010	TGGT1_240700	E010	0.0138942137387941	1.09374111650171e-06	8.37640073791661e-05	71.7824858449372	0.584381137983038
TGGT1_292330:E006	TGGT1_292330	E006	0.0438062278300291	1.09384609144025e-06	8.37640073791661e-05	31.6778909097906	1.05887726967069
TGGT1_286920:E005	TGGT1_286920	E005	0.00737287102053749	1.10288977669848e-06	8.43710679174337e-05	135.81531988777	0.425851966887828
TGGT1_275810:E002	TGGT1_275810	E002	0.0131709768597422	1.10506646791124e-06	8.44521069541633e-05	75.7428887126808	0.585180854522624
TGGT1_211630:E006	TGGT1_211630	E006	0.00784500478933373	1.12995137367504e-06	8.62666512374814e-05	127.576180236772	-0.443795405266454
TGGT1_310530:E018	TGGT1_310530	E018	0.0854574814709592	1.13497857360875e-06	8.65630177098857e-05	11.627010423662	2.02999760280223
TGGT1_219500:E014	TGGT1_219500	E014	0.00871395116630466	1.15378646202632e-06	8.78202299827527e-05	114.762841463174	0.453924073105341
TGGT1_223390:E013	TGGT1_223390	E013	0.0321562402456163	1.15372253384093e-06	8.78202299827527e-05	30.9369984440109	0.935485382977169
TGGT1_203300:E029	TGGT1_203300	E029	0.00128451369312924	1.1597053373231e-06	8.81819404482437e-05	1835.76855997142	-0.121721069644243
TGGT1_205330:E002	TGGT1_205330	E002	0.00463664355193864	1.18309208341461e-06	8.98698149232597e-05	217.05529705648	-0.325527710947149
TGGT1_314900:E015	TGGT1_314900	E015	0.0394334129514372	1.18649594973965e-06	9.003788842693e-05	44.1674526429281	-0.970642694051977
TGGT1_239800:E004	TGGT1_239800	E004	0.00262170459189066	1.20445688539476e-06	9.13091878755335e-05	387.934445372015	0.232461521427201
TGGT1_237530:E021	TGGT1_237530	E021	0.0131535851837788	1.20662917942114e-06	9.13822110611307e-05	75.8435123892571	0.561322220190225
TGGT1_259115:E004	TGGT1_259115	E004	0.00583393300125889	1.21181820347126e-06	9.16833267815461e-05	224.042813553454	0.358141009932827
TGGT1_243280A:E013	TGGT1_243280A	E013	0.00961424138691577	1.22030789234871e-06	9.22333111194999e-05	103.946234908285	0.466404788063318
TGGT1_225220:E043	TGGT1_225220	E043	0.0427464361881201	1.22388471000293e-06	9.2411242908533e-05	23.261343936073	-1.10412105092539
TGGT1_249810:E063	TGGT1_249810	E063	0.0339889049883799	1.22668394383523e-06	9.25301655119306e-05	55.2833581646546	0.852233274744276
TGGT1_260500:E005	TGGT1_260500	E005	0.00639051794078992	1.23244698643474e-06	9.28721915540483e-05	156.898359184395	-0.399958533060018
TGGT1_313860:E011	TGGT1_313860	E011	0.0636566606819816	1.23576109453354e-06	9.30291783336991e-05	15.6128712388953	1.40301971552302
TGGT1_226910:E010	TGGT1_226910	E010	0.0321767454872569	1.24378486684613e-06	9.35400475681233e-05	30.917245023944	0.961904801147884
TGGT1_226910:E025	TGGT1_226910	E025	0.0506365980048826	1.26115123213272e-06	9.47518214980667e-05	19.6323133078684	1.29020748504723
TGGT1_277510:E009	TGGT1_277510	E009	0.0438067049003903	1.26891753493582e-06	9.52406406410323e-05	22.6975401523187	1.063651232631
TGGT1_246330:E005	TGGT1_246330	E005	0.0215417206382357	1.2724198115649e-06	9.54087640850179e-05	46.2251664819538	0.718389259174072
TGGT1_289570:E027	TGGT1_289570	E027	0.0540325692193025	1.27435027438027e-06	9.54588131201285e-05	18.3969898462363	1.3290929534408
TGGT1_320670:E017	TGGT1_320670	E017	0.0241470817519759	1.28460788399732e-06	9.61319139487976e-05	41.2247838043279	0.80704120986517
TGGT1_213740:E011	TGGT1_213740	E011	0.0690013538123654	1.29072928576974e-06	9.64944617972781e-05	14.4024401320155	1.48350421334735
TGGT1_281430:E010	TGGT1_281430	E010	0.0218091449870604	1.30852724063591e-06	9.77283655155565e-05	45.6567290485367	0.72176851396783
TGGT1_254450:E010	TGGT1_254450	E010	0.0246353001354557	1.32465052023202e-06	9.8834882152198e-05	40.405727254547	0.797229890439075
TGGT1_323020:E013	TGGT1_323020	E013	0.00987664612999976	1.32612013918568e-06	9.88469549900711e-05	101.167046686588	0.471017951795139
TGGT1_277840:E011	TGGT1_277840	E011	0.136772223398744	1.33836168408046e-06	9.96611357696252e-05	7.26275569594036	2.75311857670024
TGGT1_239020:E060	TGGT1_239020	E060	0.0595011075973383	1.34801407677719e-06	0.000100281102313951	16.7044154741659	1.36703228243512
TGGT1_265390:E013	TGGT1_265390	E013	0.00965454467747181	1.35659568633827e-06	0.000100820270565211	103.509489968566	0.469692165106832
TGGT1_210820:E007	TGGT1_210820	E007	0.0316461228876586	1.3783831217647e-06	0.000102338853741866	31.4366683984262	0.93182126126163
TGGT1_233430:E021	TGGT1_233430	E021	0.0692871005381617	1.37985616379008e-06	0.000102347682602141	14.3429896376261	1.68568237958921
TGGT1_278510:E012	TGGT1_278510	E012	0.00521022634167681	1.38195146839388e-06	0.000102402603807987	192.871078730716	-0.353103188897126
TGGT1_236820:E006	TGGT1_236820	E006	0.0458860536577697	1.41100796190392e-06	0.000104453284795908	22.610244030251	1.12987644452143
TGGT1_259940:E002	TGGT1_259940	E002	0.0121014914794733	1.42112267664235e-06	0.000105099113645775	88.946220421508	-0.516544991461221
TGGT1_217020:E001	TGGT1_217020	E001	0.0184045598184526	1.42619059060454e-06	0.000105370808620794	82.2593400976257	0.630361397967658
TGGT1_246020:E010	TGGT1_246020	E010	0.0137792696473776	1.45510707829839e-06	0.000107402249210888	160.442395565569	0.515126555191185
TGGT1_246740:E004	TGGT1_246740	E004	0.0219246207373296	1.45971439448183e-06	0.000107637203281684	45.4155726296965	0.731629904944946
TGGT1_216790:E020	TGGT1_216790	E020	0.0384999691486056	1.48310333723286e-06	0.000109168173887999	25.8311788890006	1.0133212693043
TGGT1_260340:E012	TGGT1_260340	E012	0.0473094314851827	1.48336527986789e-06	0.000109168173887999	21.0148298484109	1.21723398770669
TGGT1_240910:E021	TGGT1_240910	E021	0.0139071458403923	1.49418433219107e-06	0.000109857432096951	71.7154358593833	0.589632644563745
TGGT1_265020:E014	TGGT1_265020	E014	0.0307198818101229	1.49781462100795e-06	0.000110017322337243	32.3864468220668	0.896606468520167
TGGT1_243730:E004	TGGT1_243730	E004	0.00509368128533083	1.51113532488111e-06	0.00011088799041278	197.338650775556	-0.349681343660621
TGGT1_234280:E018	TGGT1_234280	E018	0.0558408723107586	1.52302470016074e-06	0.000111652039658147	17.8005723110761	1.29001501049533
TGGT1_207930:E003	TGGT1_207930	E003	0.0137852128806584	1.52831789627801e-06	0.000111931514764036	72.3526518355249	0.551577003620465
TGGT1_211850:E007	TGGT1_211850	E007	0.0104054469894956	1.55482848472057e-06	0.00011376287176394	193.87597873913	-0.403493003405089
TGGT1_319530:E017	TGGT1_319530	E017	0.0210856347535734	1.55998778554348e-06	0.000114029977569582	70.062234985426	-0.690045397047384
TGGT1_254835:E002	TGGT1_254835	E002	0.0929469376851891	1.56328358196991e-06	0.000114160482794637	10.6895038126447	1.97906121172998
TGGT1_246620:E004	TGGT1_246620	E004	0.0562482899559711	1.61806229192327e-06	0.0001180467028457	17.6714962902782	1.22567823382494
TGGT1_264970:E015	TGGT1_264970	E015	0.0243490669797988	1.62671842298883e-06	0.000118563772272268	40.8819308946454	0.772349633753608
TGGT1_238380:E006	TGGT1_238380	E006	0.0144530442914803	1.64467247192094e-06	0.000119641611908305	96.5463153078003	0.566493925820185
TGGT1_266910:E004	TGGT1_266910	E004	0.00356943189799513	1.64381441995469e-06	0.000119641611908305	283.104219125583	-0.216484157193291
TGGT1_227840:E015	TGGT1_227840	E015	0.00843568384167599	1.66562397901789e-06	0.000121049222675125	118.576670322034	0.433745246560651
TGGT1_306440:E026	TGGT1_306440	E026	0.0294879020568807	1.70012849511919e-06	0.000123438147856003	33.7423889225793	0.872757813507872
TGGT1_290678:E004	TGGT1_290678	E004	0.0313069160805387	1.71196460583435e-06	0.00012417822345314	31.7779599445548	-0.890763569934548
TGGT1_297530:E021	TGGT1_297530	E021	0.118149950771247	1.75865945272128e-06	0.000127442951827018	8.4080828059982	2.30151931333521
TGGT1_304955:E030	TGGT1_304955	E030	0.00212351399906671	1.7670646850087e-06	0.00012792938986813	547.908639235531	-0.17680684550165
TGGT1_285150:E015	TGGT1_285150	E015	0.0300458500743086	1.7697949424421e-06	0.000128004441473357	33.1144951887072	0.875543427328646
TGGT1_247420:E003	TGGT1_247420	E003	0.0231618013080835	1.77566873006474e-06	0.000128306495177584	42.9831736725888	-0.740951170061953
TGGT1_270900:E026	TGGT1_270900	E026	0.0190404409139602	1.78326315116077e-06	0.00012873218289497	52.3175397534754	0.666075397099204
TGGT1_261000:E011	TGGT1_261000	E011	0.0288514544404049	1.78888180638777e-06	0.000129014565544275	34.4883380364223	0.866959534138126
TGGT1_297650:E005	TGGT1_297650	E005	0.00870623332834016	1.79748848602454e-06	0.000129511701382942	114.865308523485	0.450863839083199
TGGT1_245720:E015	TGGT1_245720	E015	0.0474064567908634	1.82769540291955e-06	0.000131562737089015	20.9717628820748	1.12863416368229
TGGT1_289350:E039	TGGT1_289350	E039	0.0022612187134953	1.83083912307693e-06	0.000131663637107898	486.025566592891	0.225523475711123
TGGT1_308860:E006	TGGT1_308860	E006	0.00470586628724816	1.84998960042719e-06	0.000132914366900654	213.819620193506	0.327263556039531
TGGT1_242790B:E002	TGGT1_242790B	E002	0.020893108790659	1.90113005779882e-06	0.000136329423176993	47.6644843086591	0.710966069136633
TGGT1_254390:E004	TGGT1_254390	E004	0.0166027521407018	1.900091868945e-06	0.000136329423176993	60.0279508291403	0.62888793791187
TGGT1_201520:E006	TGGT1_201520	E006	0.0222489479293775	1.90454071358231e-06	0.000136444546174387	59.8224891525557	0.688196746326061
TGGT1_242290:E009	TGGT1_242290	E009	0.00740835404681642	1.95768856626098e-06	0.000140119334484031	135.159304830577	0.411577471015552
TGGT1_257300:E019	TGGT1_257300	E019	0.0270360573282249	1.96748024466342e-06	0.000140686936473179	36.809481885083	0.804672484719475
TGGT1_229920:E005	TGGT1_229920	E005	0.00796092189659765	2.00135863360128e-06	0.000142974185486627	125.703927725555	-0.427254533870959
TGGT1_233430:E002	TGGT1_233430	E002	0.0371453503229793	2.01939088971281e-06	0.000144126158853894	51.5723953826554	0.86065110587988
TGGT1_238180:E010	TGGT1_238180	E010	0.0136274355399708	2.06548047286313e-06	0.000147276551981076	73.1941906317788	0.555482311641617
TGGT1_312640:E004	TGGT1_312640	E004	0.0186359039541694	2.13970872697209e-06	0.000152425508955706	53.4570251150347	0.652792336506757
TGGT1_312660:E011	TGGT1_312660	E011	0.0394116641328777	2.15278072590682e-06	0.000153212309628521	29.2538055718326	0.997604012815058
TGGT1_240910:E026	TGGT1_240910	E026	0.0338579880899461	2.17209015579354e-06	0.000154441127145049	29.3791981976356	0.983123410529232
TGGT1_293540:E004	TGGT1_293540	E004	0.0136848079588327	2.21897844055629e-06	0.000157478712201057	72.8859272765326	0.560206984717279
TGGT1_311335:E041	TGGT1_311335	E041	0.0080648063169954	2.21783516182366e-06	0.000157478712201057	124.072109128301	0.453330320165811
TGGT1_319860:E013	TGGT1_319860	E013	0.0807310998586809	2.2233997072077e-06	0.000157644462167141	12.3082362660619	1.67090556685747
TGGT1_210980:E003	TGGT1_210980	E003	0.022912997856582	2.23033247976258e-06	0.00015798780645306	43.4511834577931	0.752091389954286
TGGT1_233430:E018	TGGT1_233430	E018	0.076517496328053	2.24989003122586e-06	0.000159223959119956	12.986568324797	1.77180933335498
TGGT1_295468:E027	TGGT1_295468	E027	0.139571121906939	2.25461336229e-06	0.000159408968333585	7.11704654192227	2.72216884565976
TGGT1_230400:E025	TGGT1_230400	E025	0.0319325689431446	2.26149264516879e-06	0.000159745922530044	35.952418584701	0.885068444174551
TGGT1_206695:E004	TGGT1_206695	E004	0.00269662997927794	2.30854676282435e-06	0.000162917442976462	376.900952478935	0.166873497664915
TGGT1_300250:E005	TGGT1_300250	E005	0.0425792280052755	2.32088034310649e-06	0.000163635054190928	23.3528247869195	1.08366003867211
TGGT1_206540:E011	TGGT1_206540	E011	0.00100324431481134	2.39821827836991e-06	0.0001689302273213	1468.23892986466	-0.0958595537055063
TGGT1_208590:E008	TGGT1_208590	E008	0.0189807992573667	2.41682108501482e-06	0.000170082096133696	69.4405539274477	0.642880700828082
TGGT1_288010:E001	TGGT1_288010	E001	0.00371322397769599	2.43439542462266e-06	0.000171000441434786	271.95420223609	0.245011926345012
TGGT1_319530:E013	TGGT1_319530	E013	0.0189354129797382	2.43348177511363e-06	0.000171000441434786	52.6086838698388	0.675728473738468
TGGT1_313120:E015	TGGT1_313120	E015	0.0278832805106336	2.44758260305522e-06	0.000171767120059535	35.6885358357009	0.837365037661223
TGGT1_297150:E005	TGGT1_297150	E005	0.0390105137844014	2.46494793817587e-06	0.000172825320095741	68.2994746802778	-0.836506129853579
TGGT1_210820:E008	TGGT1_210820	E008	0.0254875777923121	2.48492017471355e-06	0.000174064167419091	39.0512931057868	0.796013329615664
TGGT1_204480:E014	TGGT1_204480	E014	0.056116147595204	2.48827023029607e-06	0.00017413744495022	17.7131553786463	1.26181635004921
TGGT1_297780:E020	TGGT1_297780	E020	0.0397268436619008	2.4931320253798e-06	0.000174316285608007	25.0321883547202	1.03352477980835
TGGT1_217020:E008	TGGT1_217020	E008	0.0216855620395729	2.51631991897855e-06	0.000175774946502992	45.917669630739	0.718085056559599
TGGT1_313480:E017	TGGT1_313480	E017	0.0836839433045689	2.53449444856776e-06	0.000176881033621097	11.8736085498224	1.72799745527437
TGGT1_202680:E006	TGGT1_202680	E006	0.0177821490476707	2.56804427046521e-06	0.000178882305187284	56.0326188787837	0.651118828173743
TGGT1_242010:E003	TGGT1_242010	E003	0.0814145133226778	2.56605380256301e-06	0.000178882305187284	12.2048388114845	1.65663475365184
TGGT1_253020:E013	TGGT1_253020	E013	0.0196756115077982	2.57027048018564e-06	0.000178882305187284	56.7798864990688	0.679223197526033
TGGT1_213325:E010	TGGT1_213325	E010	0.0348596404074799	2.57796903764627e-06	0.000179253041217461	28.5335094079754	0.957479656396848
TGGT1_236790:E011	TGGT1_236790	E011	0.0328321040489847	2.58296287696405e-06	0.000179435202359097	30.2989359962027	0.922731536081525
TGGT1_234640:E003	TGGT1_234640	E003	0.0259478644404072	2.58912639612526e-06	0.00017969821053438	38.3568994647058	0.78944333242679
TGGT1_217350:E013	TGGT1_217350	E013	0.0271665238727522	2.61129272542197e-06	0.000181070391534718	36.6322991155735	0.799626777011206
TGGT1_310610:E005	TGGT1_310610	E005	0.00799124871530428	2.63646414388336e-06	0.000182648242825841	125.223134082967	0.379676110253774
TGGT1_263490:E004	TGGT1_263490	E004	0.017072611961799	2.67086272402296e-06	0.00018486185568416	58.4102107122656	0.620881315972705
TGGT1_262490:E001	TGGT1_262490	E001	0.00186139304176874	2.69137885093296e-06	0.000185941312898734	551.876448072035	-0.177499552322396
TGGT1_304670:E002	TGGT1_304670	E002	0.00876348428836306	2.68919959710245e-06	0.000185941312898734	159.468020160508	0.395173471996814
TGGT1_289350:E037	TGGT1_289350	E037	0.00237994892115248	2.71625610027556e-06	0.000187488647096829	428.399734774603	0.233565260428808
TGGT1_320670:E025	TGGT1_320670	E025	0.00952491349865667	2.72398589727593e-06	0.000187850640591158	104.927493730616	0.457028872298161
TGGT1_306220:E018	TGGT1_306220	E018	0.0196546383458182	2.76144958527753e-06	0.000190260603969413	50.6774467364163	0.684607897739265
TGGT1_290270:E010	TGGT1_290270	E010	0.0100530112652979	2.76698926833356e-06	0.000190468654716928	126.037385981235	0.438395055737434
TGGT1_203880:E002	TGGT1_203880	E002	0.00855772474397754	2.86514903172929e-06	0.000197046127494234	116.873263908241	0.437620795293887
TGGT1_311335:E009	TGGT1_311335	E009	0.00407563303039531	2.90622296034183e-06	0.00019968922162596	247.396547431354	-0.304240662599801
TGGT1_282055:E006	TGGT1_282055	E006	0.00421773060064755	2.92220250836786e-06	0.000200604822876893	238.936717659246	-0.313504628638067
TGGT1_230340:E001	TGGT1_230340	E001	0.000920419309335737	2.93616850144716e-06	0.000201380660323393	1157.02076303657	-0.118412384467271
TGGT1_289570:E039	TGGT1_289570	E039	0.0266418766971269	2.9432672438317e-06	0.000201684519332083	37.3553736137525	0.821636580062711
TGGT1_223855:E014	TGGT1_223855	E014	0.0161734383662872	2.95322513302288e-06	0.00020218357065592	61.6275141452383	0.581325920819802
TGGT1_235450:E010	TGGT1_235450	E010	0.0131974873763334	3.02233076981171e-06	0.000206568666768001	114.114228166906	0.511255460922567
TGGT1_263140:E024	TGGT1_263140	E024	0.064254786833987	3.02274278856619e-06	0.000206568666768001	15.4673952899535	1.40249099057781
TGGT1_262140:E016	TGGT1_262140	E016	0.0330430355547343	3.04936013661624e-06	0.000208199401847993	30.1051563484425	0.916428292419476
TGGT1_285870:E002	TGGT1_285870	E002	0.0132548614603958	3.06056975100744e-06	0.000208776157870618	297.871920053749	-0.474130288540262
TGGT1_264950:E009	TGGT1_264950	E009	0.092312736173888	3.08010371996299e-06	0.000209919205917262	10.7629917863169	1.77585638885952
TGGT1_215740:E015	TGGT1_215740	E015	0.0170062282704061	3.08909739153079e-06	0.00021034248562764	58.5985414892289	0.631874775568266
TGGT1_272155:E010	TGGT1_272155	E010	0.0551146160227892	3.11190530694996e-06	0.000211704794698372	18.0353993374095	1.23504958904543
TGGT1_224110:E014	TGGT1_224110	E014	0.0150755364362002	3.15203652291108e-06	0.000214242108340526	66.1342608196073	0.583392207698153
TGGT1_266400:E002	TGGT1_266400	E002	0.0553401790432133	3.22665755548994e-06	0.000219117009307314	17.9618053904527	1.28908394718562
TGGT1_202160:E008	TGGT1_202160	E008	0.0684913946557493	3.24648554340165e-06	0.000220068045149223	14.5097724525794	1.62857468216441
TGGT1_320300:E004	TGGT1_320300	E004	0.144388538372459	3.24367968572339e-06	0.000220068045149223	21.4324511058972	2.12862034994242
TGGT1_282055:E005	TGGT1_282055	E005	0.00539915960404327	3.26267742582948e-06	0.000220967459855774	186.043169979101	-0.352073843045896
TGGT1_266920:E001	TGGT1_266920	E001	0.00117343441404043	3.35069487933779e-06	0.00022652255847058	893.56289533471	-0.15435439120133
TGGT1_315210:E014	TGGT1_315210	E014	0.0148438742760574	3.35011126904491e-06	0.00022652255847058	67.1707390300482	-0.602787754395939
TGGT1_223810:E018	TGGT1_223810	E018	0.0167947151939189	3.39237202887655e-06	0.000228930591684417	59.3392796919689	-0.619937713554841
TGGT1_314090:E002	TGGT1_314090	E002	0.0149878911705676	3.39066687281352e-06	0.000228930591684417	66.5226102674512	0.578441331431596
TGGT1_230080:E021	TGGT1_230080	E021	0.0508496149862277	3.40234669582681e-06	0.000229398900949137	19.5499696350866	1.1879662097014
TGGT1_218800:E007	TGGT1_218800	E007	0.0578076616401157	3.41162222983184e-06	0.00022981927930049	17.1942905347513	1.30690348046134
TGGT1_202160:E013	TGGT1_202160	E013	0.0387599895950649	3.45095099758362e-06	0.000232261601335143	25.6576121884479	1.07581177919986
TGGT1_210730:E015	TGGT1_210730	E015	0.0127154854858804	3.49412722124667e-06	0.000234958295050058	78.4694877895401	0.526027091927296
TGGT1_231170:E004	TGGT1_231170	E004	0.104481260958872	3.50795365628738e-06	0.000235678358444011	9.50872053553685	1.92808365473301
TGGT1_226910:E027	TGGT1_226910	E027	0.0634632497272201	3.5408038867362e-06	0.000237674102457633	21.8059899712648	1.30477169074048
TGGT1_250100:E002	TGGT1_250100	E002	0.000821524466562317	3.56893047687207e-06	0.000239349514909445	1307.72664934921	-0.0552719127733287
TGGT1_313590A:E007	TGGT1_313590A	E007	0.0855478523990616	3.57574822748591e-06	0.000239594151178936	11.6147189500221	1.80250274763854
TGGT1_272640:E004	TGGT1_272640	E004	0.0217101044516055	3.59215317253896e-06	0.000240480178110575	45.8656122010391	0.692414713081639
TGGT1_214090:E022	TGGT1_214090	E022	0.0118314668689885	3.59557823269875e-06	0.000240496454852953	84.3635617370188	0.518906582885375
TGGT1_227780:E022	TGGT1_227780	E022	0.0788231290669457	3.64846216314685e-06	0.000243817919730297	12.6064015859635	1.56576511071689
TGGT1_315080:E007	TGGT1_315080	E007	0.0173807297800659	3.67813759739515e-06	0.000245583918627491	57.3313821300493	0.638830660402999
TGGT1_294960:E017	TGGT1_294960	E017	0.0455032897672513	3.68770358880698e-06	0.000246005306839549	21.8501052258048	1.09951242868616
TGGT1_259115:E027	TGGT1_259115	E027	0.00462799747996774	3.70861019328214e-06	0.000247181812723678	217.46633291476	0.316116044144909
TGGT1_244310:E013	TGGT1_244310	E013	0.0436444680832914	3.71670494455764e-06	0.000247503077638375	22.7820328406638	1.05279597381826
TGGT1_278800:E020	TGGT1_278800	E020	0.033413744250218	3.77115201962518e-06	0.000250907756995872	29.7705311148964	0.896580686885803
TGGT1_270710:E002	TGGT1_270710	E002	0.0796821187601039	3.77648411851356e-06	0.000251041532669738	12.4703956796679	1.56795964310995
TGGT1_280560:E012	TGGT1_280560	E012	0.0193561892022378	3.86763491590847e-06	0.000256874852560803	51.4613540504505	0.670396498663562
TGGT1_229740:E008	TGGT1_229740	E008	0.0331539370630506	3.93936323400835e-06	0.000261409088632853	30.0042636454525	0.905690505022993
TGGT1_239020:E059	TGGT1_239020	E059	0.0340064253078093	4.03998407726845e-06	0.000267850944322898	29.2507234417602	0.916624999138645
TGGT1_292220:E004	TGGT1_292220	E004	0.00455574730542847	4.08579145849147e-06	0.000270650560925243	220.962956219834	0.307271485781088
TGGT1_248850:E002	TGGT1_248850	E002	0.0661714861665788	4.1147180819012e-06	0.000272328040338228	15.0189502754294	1.37656408420861
TGGT1_239540:E006	TGGT1_239540	E006	0.0118003052339708	4.14740744844838e-06	0.000274087951966899	84.58752661303	0.489928894502595
TGGT1_242080:E011	TGGT1_242080	E011	0.0071883322664695	4.14856205247456e-06	0.000274087951966899	139.332438604264	0.375966795332146
TGGT1_280400:E013	TGGT1_280400	E013	0.0480692492004112	4.20514369061421e-06	0.000277583554955461	20.6822231757913	1.13445318641778
TGGT1_209250:E010	TGGT1_209250	E010	0.0210169317751053	4.26074497701468e-06	0.000280763406148844	47.3828305111193	0.732921566613279
TGGT1_239910:E001	TGGT1_239910	E001	0.00563742048831244	4.25714650615603e-06	0.000280763406148844	178.092380337978	-0.207367221282735
TGGT1_277030:E035	TGGT1_277030	E035	0.0341326645525243	4.29568508851944e-06	0.00028281922505268	29.142342256019	0.920517564526831
TGGT1_268280:E026	TGGT1_268280	E026	0.00724737664712574	4.30691840978998e-06	0.000283312016752608	138.187458647873	0.391120019920326
TGGT1_410170:E004	TGGT1_410170	E004	0.000639777580775523	4.41967612704924e-06	0.000290476487856205	5695.44528969822	0.0225768057642252
TGGT1_246080:E004	TGGT1_246080	E004	0.0355698808780185	4.51220318472374e-06	0.000296300035714847	27.9627682227809	0.926701506365128
TGGT1_290910:E004	TGGT1_290910	E004	0.0428927752352691	4.52383390898346e-06	0.000296805915372211	23.1818668607094	1.07680911791913
TGGT1_318320:E002	TGGT1_318320	E002	0.0140715375414543	4.57315427770009e-06	0.000299781566883892	70.8738910363115	0.537510396763103
TGGT1_207680:E002	TGGT1_207680	E002	0.0116295173530212	4.62209872570556e-06	0.000302727440109426	85.8364434936803	0.500372694127019
TGGT1_262600:E008	TGGT1_262600	E008	0.0135675111812452	4.67582280618539e-06	0.000305980986439051	73.5189620632712	-0.44607088702232
TGGT1_244710:E003	TGGT1_244710	E003	0.00336386631905802	4.68362863442488e-06	0.000306226660421368	300.731016154745	-0.15874819493068
TGGT1_227860:E009	TGGT1_227860	E009	0.0344506630491263	4.70275018504678e-06	0.00030721111882991	31.2289959963569	0.864742846763486
TGGT1_213920:E021	TGGT1_213920	E021	0.0309698232494635	4.77862054216582e-06	0.000311897839221051	32.1245459094118	0.859822983803781
TGGT1_308090:E008	TGGT1_308090	E008	0.0655843742668731	4.79671368901153e-06	0.000312808640244064	15.1535278379041	-1.34270080492632
TGGT1_311335:E020	TGGT1_311335	E020	0.0123430037384501	4.830912479061e-06	0.000314767264648611	130.856978532926	0.490858988332912
TGGT1_304955:E021	TGGT1_304955	E021	0.0122998512034222	4.84933903136028e-06	0.000315424047046706	1467.4797574791	0.407578499904241
TGGT1_308040:E010	TGGT1_308040	E010	0.0673582125400908	4.84740646054282e-06	0.000315424047046706	14.7540994537303	1.41202345115851
TGGT1_241300:E016	TGGT1_241300	E016	0.0162294036745343	4.86015821668298e-06	0.000315855957294353	61.4141798628804	0.596324500562754
TGGT1_226730:E014	TGGT1_226730	E014	0.0526988401432897	4.88552072104859e-06	0.000317231466613655	18.8631410879096	1.15544212735934
TGGT1_203390:E001	TGGT1_203390	E001	0.00207292497694737	4.89339757583174e-06	0.000317470193627909	916.524427829133	-0.129396492696758
TGGT1_224280:E010	TGGT1_224280	E010	0.0585885474531466	4.90379546705883e-06	0.000317871928808954	16.9648760009625	1.25739391290205
TGGT1_289570:E038	TGGT1_289570	E038	0.0128109797849698	4.94429191113697e-06	0.000320222340383509	77.881711323272	0.53695478148302
TGGT1_222010:E003	TGGT1_222010	E003	0.0161063175068507	4.96482903324123e-06	0.000321277147252088	61.8853351821647	0.579628538280484
TGGT1_246080:E006	TGGT1_246080	E006	0.00508422581320516	4.99936850943985e-06	0.000323235475346863	197.710205600618	0.300894557211406
TGGT1_253400:E018	TGGT1_253400	E018	0.0485311509172584	5.05212971447261e-06	0.000326367579554931	20.4851244359774	1.0928660472049
TGGT1_309920:E007	TGGT1_309920	E007	0.0111576322030302	5.10702862382614e-06	0.000329632312080296	129.219251166769	0.441471886937977
TGGT1_294370:E004	TGGT1_294370	E004	0.00887387920629644	5.12745080676221e-06	0.000330668077539848	112.679929480716	0.415389223439623
TGGT1_313480:E030	TGGT1_313480	E030	0.0636046924701172	5.15965869000794e-06	0.000332461486025729	15.6256402368456	1.38574454341106
TGGT1_236510:E014	TGGT1_236510	E014	0.0411460122950907	5.20971329365192e-06	0.000335400809336285	24.1674934963151	1.00065037207417
TGGT1_279540:E017	TGGT1_279540	E017	0.00534062810217007	5.28793398786518e-06	0.000340146916315597	188.106197145192	0.325571395250445
TGGT1_274160:E005	TGGT1_274160	E005	0.00349088355843272	5.30596990314087e-06	0.000341016851376865	289.590047117154	0.253722066701741
No_genes_on_ref_contig_268+No_genes_on_ref_contig_269+No_genes_on_ref_contig_272+No_genes_on_ref_contig_271+No_genes_on_ref_contig_270:E005	No_genes_on_ref_contig_268+No_genes_on_ref_contig_269+No_genes_on_ref_contig_272+No_genes_on_ref_contig_271+No_genes_on_ref_contig_270	E005	0.00717746624891629	5.32120878849608e-06	0.000341689136177269	320.119178545236	-0.3381951048458
TGGT1_200330:E010	TGGT1_200330	E010	0.0308198785892033	5.3299924790691e-06	0.000341689136177269	32.2811544723932	0.84357652566511
TGGT1_263320:E003	TGGT1_263320	E003	0.0128360625944563	5.32676193498478e-06	0.000341689136177269	425.331490195854	0.329790059500711
TGGT1_320640:E010	TGGT1_320640	E010	0.0278253988590482	5.33875540163598e-06	0.000341960856581738	35.7629406972049	0.811066533389673
TGGT1_268210:E014	TGGT1_268210	E014	0.0435790708872893	5.36491621579736e-06	0.000343345552432172	22.8162697607192	1.00183975243958
TGGT1_215910:E002	TGGT1_215910	E002	0.0866478301241338	5.42607922981962e-06	0.000346966091665166	28.0681039867998	1.35096055561359
TGGT1_281545:E016	TGGT1_281545	E016	0.0941872358577627	5.47388151554281e-06	0.000349726891553471	10.5486466807793	1.94316151548344
TGGT1_225680:E038	TGGT1_225680	E038	0.00234630998293141	5.47896056802398e-06	0.000349755741260463	434.709143943559	-0.165425980296666
TGGT1_224980:E011	TGGT1_224980	E011	0.00729993668839109	5.48857383924412e-06	0.000350073745078269	137.183938631225	0.363695954137617
TGGT1_248830:E029	TGGT1_248830	E029	0.0520800214937636	5.52403775860256e-06	0.000351742057178348	19.0875426478946	1.14693260803725
TGGT1_270840:E029	TGGT1_270840	E029	0.112589513917488	5.52209409281497e-06	0.000351742057178348	8.82356099502368	2.01844968469404
TGGT1_298060:E012	TGGT1_298060	E012	0.00554854708298208	5.53697257987559e-06	0.0003522689070136	180.977340403927	0.322216868842733
TGGT1_257390:E012	TGGT1_257390	E012	0.0346185714167061	5.58099290054576e-06	0.000354770904465138	28.7325626920237	0.97991794264357
TGGT1_266640:E035	TGGT1_266640	E035	0.0161622413492984	5.59799798187619e-06	0.000355552843248879	61.6703741302499	-0.60012346810362
TGGT1_287160:E002	TGGT1_287160	E002	0.00875725957768389	5.6299522460853e-06	0.00035728215840774	114.191225007872	-0.444037658947157
TGGT1_227948:E024	TGGT1_227948	E024	0.0290094373742104	5.69886176522905e-06	0.000361351820419079	67.1076260513962	0.748115657691204
TGGT1_313980:E009	TGGT1_313980	E009	0.194890109882988	5.81906504727789e-06	0.000368664354068196	5.09624796347347	13.9219995216652
TGGT1_262590:E002	TGGT1_262590	E002	0.021276112888898	5.90738677291327e-06	0.000373946488333611	141.952744942448	-0.582618701959634
TGGT1_282055:E016	TGGT1_282055	E016	0.00314626672631123	5.97981138204996e-06	0.000378214312868703	321.949926339715	0.251440090316381
TGGT1_297710:E008	TGGT1_297710	E008	0.0221636591757742	6.0190338782238e-06	0.00038037677139123	44.9243786211091	0.704167722200514
TGGT1_226740:E012	TGGT1_226740	E012	0.0121029772782551	6.070715905253e-06	0.000383322347160261	82.4612154818672	0.512049704089341
TGGT1_311230:E028	TGGT1_311230	E028	0.009635478253207	6.07944052646466e-06	0.000383552816253132	103.715644143713	0.460164758119603
TGGT1_234220:E007	TGGT1_234220	E007	0.0112471971345218	6.091827635552e-06	0.000384013775104497	88.7704833551972	0.46817499702488
TGGT1_213920:E011	TGGT1_213920	E011	0.0158071880457558	6.13484218017515e-06	0.000386403034718332	63.0610626525021	0.583555850613667
TGGT1_205510:E008	TGGT1_205510	E008	0.0214471420165127	6.15321283285094e-06	0.000387237412433422	74.8807219045166	0.621729372774348
TGGT1_223750:E007	TGGT1_223750	E007	0.0360068753428481	6.18185095547409e-06	0.000388716022393213	27.6228124361813	0.868333875364232
TGGT1_248160:E016	TGGT1_248160	E016	0.0637060816624266	6.21038771195545e-06	0.000390185805523705	15.6007474605918	1.28048812208798
TGGT1_315980:E005	TGGT1_315980	E005	0.0393130104884342	6.29624897672551e-06	0.000395251736012349	25.2961107953335	0.937172486423169
TGGT1_263100:E018	TGGT1_263100	E018	0.0410211829313623	6.38587684326599e-06	0.000400545513334216	24.2411481169421	1.00296941439758
TGGT1_253820:E006	TGGT1_253820	E006	0.00681390770909911	6.42134701505944e-06	0.0004024363599438	337.127188812923	0.329228737896706
TGGT1_225120:E013	TGGT1_225120	E013	0.000763663242760292	6.45013887092592e-06	0.000403905879156854	1415.60791039578	-0.105998116949911
TGGT1_233090:E009	TGGT1_233090	E009	0.021314044592931	6.51010646351693e-06	0.000407323565170146	46.7203893845783	0.671947558624262
TGGT1_281980:E002	TGGT1_281980	E002	0.0065377720652323	6.55490011206458e-06	0.000409786981199392	153.330458567803	0.337826489435358
TGGT1_266960:E002	TGGT1_266960	E002	0.00751409886365707	6.56256880676632e-06	0.000409927335167778	191.893904964474	-0.372427477086575
TGGT1_304955:E019	TGGT1_304955	E019	0.00551291967667621	6.58733285646467e-06	0.000411134427710415	182.160274431619	0.368496452560686
TGGT1_311335:E001	TGGT1_311335	E001	0.00311756852909708	6.59420752599166e-06	0.00041122392180652	324.973983418547	-0.250530560713938
TGGT1_270100:E012	TGGT1_270100	E012	0.0450775108683551	6.66192585869312e-06	0.000415104435491957	22.0567755571555	1.02223949552797
TGGT1_254230:E007	TGGT1_254230	E007	0.0456353328671412	6.67299070170899e-06	0.000415451386504587	21.7867968644079	1.06387566641332
TGGT1_320670:E018	TGGT1_320670	E018	0.0272492219848124	6.73440438110352e-06	0.000418929836981536	36.5208698343739	0.803467471918371
TGGT1_249300:E023	TGGT1_249300	E023	0.0110731847570292	6.75449032146152e-06	0.000419833789043343	90.1733794818361	-0.491365731362936
TGGT1_320080:E017	TGGT1_320080	E017	0.00985794111989762	6.80364519634782e-06	0.000422541586877865	101.360227076576	-0.460740144760956
TGGT1_201770:E020	TGGT1_201770	E020	0.068294015373234	6.81404419997262e-06	0.000422839974320468	14.5517460040992	1.39380930131873
TGGT1_214240:E009	TGGT1_214240	E009	0.0200679922509755	6.83414221720679e-06	0.000423739242871963	60.4833145220981	0.659209336441031
TGGT1_266120:E004	TGGT1_266120	E004	0.00492261474149595	6.85411786524975e-06	0.000424629456140415	204.284263984623	0.302276324772231
TGGT1_200330:E031	TGGT1_200330	E031	0.00226272967407171	6.97678601220872e-06	0.000431875053541981	451.220786951198	-0.199472303801105
TGGT1_257180:E002	TGGT1_257180	E002	0.0538400787846943	7.03791333301429e-06	0.000435302426788778	18.4628394033373	1.19600270506758
TGGT1_203180:E010	TGGT1_203180	E010	0.0952610865728372	7.06133855586695e-06	0.000436394187023333	10.4296570466003	1.64171207038171
TGGT1_249840:E059	TGGT1_249840	E059	0.126611294208181	7.10321640848374e-06	0.000438623613223871	11.0149430689278	1.83966034964182
TGGT1_250220:E029	TGGT1_250220	E029	0.0879580681317624	7.16717481672564e-06	0.000442211760814496	11.2962284136844	-1.58772858584207
TGGT1_252380:E025	TGGT1_252380	E025	0.066346021860558	7.22837976738028e-06	0.00044562430634432	27.0083517344332	1.1746055993332
TGGT1_311240:E002	TGGT1_311240	E002	0.00898427307203709	7.25429700644761e-06	0.000446857600930174	196.636954549594	0.397206408613089
TGGT1_208040:E016	TGGT1_208040	E016	0.0385250332322043	7.29623863671209e-06	0.000448709771065885	25.8143461173962	0.9385226474655
TGGT1_316730:E053	TGGT1_316730	E053	0.0348879655520239	7.29550420685738e-06	0.000448709771065885	35.4202726841614	0.862276040711647
TGGT1_249350:E017	TGGT1_249350	E017	0.00168340988298166	7.31943655553558e-06	0.00044977045019552	776.994140080593	-0.137854198806779
TGGT1_297180:E016	TGGT1_297180	E016	0.00169214804845147	7.33186095769835e-06	0.000450167924374295	609.182946415477	-0.166134164872154
TGGT1_235170:E021	TGGT1_235170	E021	0.0123675296146505	7.35047219479222e-06	0.000450944309599664	87.0098066587162	-0.512006250497023
TGGT1_217020:E013	TGGT1_217020	E013	0.013118031067879	7.39630817014863e-06	0.000453388292065023	76.0500533957425	0.529325409473157
TGGT1_236960:E015	TGGT1_236960	E015	0.00879467400358962	7.54323825438012e-06	0.000461813009558736	113.701966666397	0.423816570160291
TGGT1_278490:E007	TGGT1_278490	E007	0.030830793306293	7.54596420847608e-06	0.000461813009558736	32.2697031680708	0.814013173167616
TGGT1_265530:E002	TGGT1_265530	E002	0.0277020201349497	7.60851132966453e-06	0.000465264161261088	35.9225798670919	0.764000774780496
TGGT1_202360:E009	TGGT1_202360	E009	0.0287692547991543	7.77383448481029e-06	0.000474989456775207	34.5870920334959	0.794508856500275
TGGT1_233230:E008	TGGT1_233230	E008	0.000723084270136719	7.79447179168828e-06	0.000475865724522927	1502.53753467567	-0.0802298769382689
TGGT1_267300:E015	TGGT1_267300	E015	0.00135681179986715	7.80197080743725e-06	0.000475939110224151	766.985413097952	-0.117042815956948
TGGT1_206550:E031	TGGT1_206550	E031	0.0376526260346442	7.81375492212087e-06	0.000476273568164306	26.4134525541067	1.0048914867196
TGGT1_257300:E017	TGGT1_257300	E017	0.0320368545690985	7.82489932399034e-06	0.000476446570119961	31.0525100323125	0.83753176104342
TGGT1_263140:E019	TGGT1_263140	E019	0.0385878902250554	7.82920060449567e-06	0.000476446570119961	25.7722283691514	0.938352181357671
TGGT1_261470:E005	TGGT1_261470	E005	0.0140755807013761	7.86651740026829e-06	0.000478332355709636	70.8534422943252	-0.502678871401633
TGGT1_240860:E002	TGGT1_240860	E002	0.018533681720758	7.90460934782981e-06	0.000479876452793311	53.7528605398576	0.601101905422176
TGGT1_242070:E012	TGGT1_242070	E012	0.000443125386086491	7.90270202074922e-06	0.000479876452793311	2607.03573339388	-0.0395826442435599
TGGT1_312640:E005	TGGT1_312640	E005	0.0224334519577989	7.93744557705819e-06	0.000481476233659169	44.3825978721418	0.684044301091939
TGGT1_312840:E018	TGGT1_312840	E018	0.00219748966197788	7.94370171962879e-06	0.000481476233659169	465.007526078343	-0.159459703847108
TGGT1_256830:E009	TGGT1_256830	E009	0.0414325050169966	8.07095824506227e-06	0.000488797408716584	24.0001313384204	0.995597421138708
TGGT1_252380:E019	TGGT1_252380	E019	0.036232552346877	8.10675611895557e-06	0.000490572330650841	60.7203146683678	0.831338910795037
TGGT1_205100:E002	TGGT1_205100	E002	0.0349749197207115	8.15894546183593e-06	0.000493335532717187	28.4392935907324	-0.882648214621198
TGGT1_271145:E017	TGGT1_271145	E017	0.0913547702590694	8.18471162174557e-06	0.000494497900715247	12.5843370876494	2.05218661895057
TGGT1_307980:E027	TGGT1_307980	E027	0.0584461105842878	8.23364047844582e-06	0.000497056720959978	17.0062645768886	1.18511351810974
TGGT1_237010:E010	TGGT1_237010	E010	0.0483343136297554	8.30586365298152e-06	0.000501016589480965	20.5686559467659	1.05577530027603
TGGT1_285240:E012	TGGT1_285240	E012	0.0235398484105427	8.38220678819104e-06	0.000505218463688242	56.0337107019208	0.675221405128927
TGGT1_201220:E008	TGGT1_201220	E008	0.0182654577773788	8.40242442106434e-06	0.000506033500074012	54.5449090667099	0.608420767342519
TGGT1_410800:E022	TGGT1_410800	E022	0.0122786937859172	8.48373958703155e-06	0.000510523889703041	81.2751234791564	0.495755248646587
TGGT1_288010:E006	TGGT1_288010	E006	0.00440923090479601	8.53948976840963e-06	0.000513469940871867	228.410626867498	-0.25963364191411
TGGT1_293060:E010	TGGT1_293060	E010	0.0207944713443838	8.55222673610795e-06	0.000513827027955891	47.8912573383006	0.666484100092251
TGGT1_261022:E060	TGGT1_261022	E060	0.0574472716777748	8.67225369256844e-06	0.000520624526284121	45.6678649947977	0.995823948872658
TGGT1_288860:E009	TGGT1_288860	E009	0.0128576695342805	8.79536180556948e-06	0.000527596060308375	77.597524890012	0.517651665096568
TGGT1_290880:E009	TGGT1_290880	E009	0.072897308509451	8.81344583781242e-06	0.00052826158867053	13.6320518797917	1.3517688690999
TGGT1_227335:E006	TGGT1_227335	E006	0.00454738311611619	8.8734702762543e-06	0.000531437900491167	417.682656047947	-0.154504491862568
TGGT1_214170:E012	TGGT1_214170	E012	0.045163528142493	9.04566491407183e-06	0.000541321809608375	28.2753080752015	0.946206985768687
TGGT1_263100:E015	TGGT1_263100	E015	0.0348994309893427	9.20788720762258e-06	0.000550593774467191	28.5009187757958	0.88834397726727
TGGT1_232450:E011	TGGT1_232450	E011	0.0217770003753533	9.326282262682e-06	0.00055723246322374	45.7243153427014	0.681853518208729
TGGT1_220160:E015	TGGT1_220160	E015	0.0198242928590205	9.33788452801059e-06	0.000557484982935305	50.2423870399656	0.626348146389437
TGGT1_221870:E002	TGGT1_221870	E002	0.00112417260198468	9.43126574015657e-06	0.000562615569986199	935.015593877558	-0.123836142057417
TGGT1_202200:E006	TGGT1_202200	E006	0.0116121505291024	9.61314915313859e-06	0.000573013437927856	85.9655103720904	0.489989781171069
TGGT1_219770:E006	TGGT1_219770	E006	0.0089815276021212	9.66808861439375e-06	0.000575834100593466	111.319970974449	0.398079182448755
TGGT1_241300:E015	TGGT1_241300	E015	0.0135029456156444	9.82494235558179e-06	0.00058471558513353	73.8721284677347	0.523191878800592
TGGT1_248830:E016	TGGT1_248830	E016	0.0842555002688108	9.90585765555703e-06	0.000589067296083644	11.7930029711248	1.51988498116508
TGGT1_410800:E024	TGGT1_410800	E024	0.00520737713223882	9.95902130361566e-06	0.000591763166800219	192.977885178412	-0.319208745033324
TGGT1_226910:E024	TGGT1_226910	E024	0.0485120693205947	1.0254295927552e-05	0.000608829689549281	20.4931923521856	1.10804909435611
TGGT1_260360:E010	TGGT1_260360	E010	0.0326445862360047	1.03122497119307e-05	0.000611789998215968	30.4733125205156	0.826452987569064
TGGT1_315210:E003	TGGT1_315210	E003	0.00633376267008193	1.03352245264229e-05	0.000612672109926347	186.736179308356	0.337456971287647
TGGT1_305760:E004	TGGT1_305760	E004	0.0565752667921297	1.03553021788413e-05	0.000613381229844187	17.5692513064509	1.1760536720685
TGGT1_219850:E010	TGGT1_219850	E010	0.0257544456435862	1.03856945159178e-05	0.000614699736023573	38.6456623490784	0.742782530478277
TGGT1_268290:E024	TGGT1_268290	E024	0.0929731159526824	1.04754225128528e-05	0.000619525339879845	10.6864919715414	1.67666368702283
TGGT1_261430:E006	TGGT1_261430	E006	0.00170571043333235	1.04938607523577e-05	0.000620130557767554	604.155689086807	-0.117925932282911
TGGT1_272010:E007	TGGT1_272010	E007	0.0227121018311798	1.0782058936185e-05	0.000636663733214634	43.8365802231997	0.673210758632604
TGGT1_221180:E014	TGGT1_221180	E014	0.000687066950267329	1.07920974367289e-05	0.000636759022999878	1931.16894793737	-0.0700575561217079
TGGT1_258828:E003	TGGT1_258828	E003	0.0378881294403666	1.08209339830422e-05	0.000637962427696016	26.2490026533526	-0.863675622298479
TGGT1_275980:E013	TGGT1_275980	E013	0.0221924756816898	1.09065841808148e-05	0.000642510869488965	44.8658810217371	0.674722906459656
TGGT1_209140:E004	TGGT1_209140	E004	0.0673079483281557	1.09217263061831e-05	0.000642901805042003	14.7651277198401	1.26808542939357
TGGT1_227948:E021	TGGT1_227948	E021	0.0233284887195792	1.11211904871417e-05	0.000654133711594662	49.4440170020072	0.712460420684095
TGGT1_217740:E007	TGGT1_217740	E007	0.031439926803946	1.1177443362268e-05	0.000656931200783001	31.6432523046462	0.847313383338239
TGGT1_249790:E005	TGGT1_249790	E005	0.0133948223827377	1.12322914924124e-05	0.00065964184582713	74.471210776035	0.522271344926042
TGGT1_203350:E014	TGGT1_203350	E014	0.0549054335388591	1.12953172163939e-05	0.000661614794710783	18.1041898615558	1.13312934491194
TGGT1_219070:E038	TGGT1_219070	E038	0.0148723283456197	1.12834585139285e-05	0.000661614794710783	67.0416860943897	-0.550598743746114
TGGT1_273100:E013	TGGT1_273100	E013	0.0270214177011999	1.12825435826415e-05	0.000661614794710783	36.8294705430589	0.738282600089025
TGGT1_321440:E014	TGGT1_321440	E014	0.0159633873781531	1.13009010078011e-05	0.000661614794710783	62.4416031103511	0.575332210465077
TGGT1_237530:E004	TGGT1_237530	E004	0.0559626898582306	1.13414420688594e-05	0.000663474361028276	17.7617815067108	1.18232360326415
TGGT1_239050:E032	TGGT1_239050	E032	0.00206961774590039	1.15277344832319e-05	0.000673850910836532	494.629472314728	-0.180111817517584
TGGT1_270690:E008	TGGT1_270690	E008	0.0675682355722364	1.15719733843595e-05	0.000675914136272533	14.7081968301593	1.33499923858829
TGGT1_209140:E005	TGGT1_209140	E005	0.0535780241900842	1.17571398770981e-05	0.0006861993406879	18.5532477775977	1.09598480969752
TGGT1_222010:E005	TGGT1_222010	E005	0.019823736813355	1.17893006223676e-05	0.000687545462685022	50.2438007542742	0.622443355506037
TGGT1_225220:E037	TGGT1_225220	E037	0.00924036186132393	1.18426410806878e-05	0.000690123745690476	108.180599754165	0.429282604422822
TGGT1_208040:E017	TGGT1_208040	E017	0.0330523401780951	1.18938871994308e-05	0.000692576103472559	30.0966653940218	0.862923842023405
TGGT1_300290:E006	TGGT1_300290	E006	0.00810084401054289	1.21193804367945e-05	0.000705163211835108	123.515881700623	-0.366823734603338
TGGT1_202500:E005	TGGT1_202500	E005	0.00380682962976859	1.21737621608462e-05	0.000707782532031601	414.133123045863	0.232498698863034
TGGT1_216680:E033	TGGT1_216680	E033	0.0117525354307287	1.21871527025232e-05	0.000708016430101543	84.9331758374444	0.484131150421892
TGGT1_278830:E033	TGGT1_278830	E033	0.0572356856638928	1.22555920987171e-05	0.000710899587110696	17.3663061793318	1.16581551392205
TGGT1_297500:E003	TGGT1_297500	E003	0.0161916101487531	1.22525643562461e-05	0.000710899587110696	61.558082779333	0.577367413582917
TGGT1_278930:E006	TGGT1_278930	E006	0.00889934810844185	1.24071622169758e-05	0.000719139673837014	112.355180096654	0.415941236783428
TGGT1_200400:E029	TGGT1_200400	E029	0.0117960909642379	1.24373301155237e-05	0.000720335850414954	84.6179067254938	0.482903907407964
TGGT1_230420:E027	TGGT1_230420	E027	0.0364690664776423	1.25620981151869e-05	0.000727004976831591	35.2803565986098	0.874419972480229
TGGT1_237220:E011	TGGT1_237220	E011	0.00577346723945257	1.26855435358103e-05	0.000733587415090755	173.850028111997	0.338695341940117
TGGT1_258080:E030	TGGT1_258080	E030	0.0519588891372758	1.28671244867403e-05	0.0007435191154104	19.1320950537161	1.08993897932018
TGGT1_202680:E011	TGGT1_202680	E011	0.0246879581451969	1.29014002952421e-05	0.000744930204060342	40.3193261929465	0.719900982240101
TGGT1_310320:E017	TGGT1_310320	E017	0.0212267946392848	1.29152101407157e-05	0.000745158330424102	46.9129924697725	0.655493407686741
TGGT1_234670:E009	TGGT1_234670	E009	0.0344335732574807	1.29354214989479e-05	0.000745755169895864	35.5125193497968	0.810018607741354
TGGT1_297180:E018	TGGT1_297180	E018	0.00282143041298375	1.33555251498309e-05	0.000769388187404357	359.853199550848	-0.218720333769567
TGGT1_200330:E003	TGGT1_200330	E003	0.0178461563179749	1.3397983427022e-05	0.000771059031072953	64.3036041863735	0.599849506072294
TGGT1_278060:E015	TGGT1_278060	E015	0.0318700313699059	1.34049319524471e-05	0.000771059031072953	31.2153721651151	0.823537766157667
TGGT1_311335:E013	TGGT1_311335	E013	0.00403097470691007	1.3632052822736e-05	0.000783526856614475	250.18041001652	-0.275158487996271
TGGT1_233838:E011	TGGT1_233838	E011	0.0175081766781402	1.3809885750686e-05	0.000791941414877349	56.9125613154749	0.60661266415231
TGGT1_281545:E017	TGGT1_281545	E017	0.0847568747870913	1.37961674342347e-05	0.000791941414877349	11.7231908321207	1.63645149305379
TGGT1_297180:E013	TGGT1_297180	E013	0.00230457796845713	1.38070439287869e-05	0.000791941414877349	442.799614912968	-0.194493471425463
TGGT1_315580:E015	TGGT1_315580	E015	0.0118461614795481	1.38425319442952e-05	0.000793211712974767	84.2583596314583	-0.496212022668881
TGGT1_202160:E012	TGGT1_202160	E012	0.0378769546677466	1.39204788151786e-05	0.000796470575177011	26.2567596048212	0.963367703577007
TGGT1_316230:E002	TGGT1_316230	E002	0.0111100248802511	1.39115152769765e-05	0.000796470575177011	89.8726849148651	-0.44597950194581
TGGT1_277030:E004	TGGT1_277030	E004	0.0217425065649235	1.39419080909296e-05	0.000797093265755403	45.7970639132046	0.671630550150712
TGGT1_260200:E011	TGGT1_260200	E011	0.00411201000208052	1.39996210002355e-05	0.000799787871836581	245.17429415744	0.260136213555913
TGGT1_289200:E017	TGGT1_289200	E017	0.0937539757943487	1.40584447367988e-05	0.000802541820314751	10.5974269599691	1.67233529549803
TGGT1_235610:E016	TGGT1_235610	E016	0.105813824252495	1.41222769874935e-05	0.000805577312655648	9.38890222529428	1.76731692295233
TGGT1_311110:E006	TGGT1_311110	E006	0.0184193704760314	1.42182073430598e-05	0.00081043781855441	54.0875843175723	0.550879755218757
TGGT1_304520:E001	TGGT1_304520	E001	0.00126135390402463	1.42511527881563e-05	0.000811703564456995	828.044618002279	-0.134971280964053
TGGT1_246090:E002	TGGT1_246090	E002	0.0785818675980822	1.42640278994182e-05	0.000811825117992337	12.6451363635808	1.41021141042158
TGGT1_235370:E006	TGGT1_235370	E006	0.046486825459506	1.45123701591948e-05	0.000825337818940752	25.9600100608943	-0.995185797600378
TGGT1_219682:E017	TGGT1_219682	E017	0.036927777264909	1.47034167229752e-05	0.000834376849507094	26.9327933289225	0.876137910173316
TGGT1_221180:E006	TGGT1_221180	E006	0.0241769397588615	1.47044264976244e-05	0.000834376849507094	171.608280875051	0.612044083258889
TGGT1_257300:E016	TGGT1_257300	E016	0.0425857590136297	1.46924708638592e-05	0.000834376849507094	23.3492381218855	0.957521924840981
TGGT1_230010:E008	TGGT1_230010	E008	0.0831634332406668	1.48577499037431e-05	0.000842444451031291	11.9479797483073	1.53642860217576
TGGT1_304680:E002	TGGT1_304680	E002	0.0301496118526232	1.4941015415149e-05	0.000846530605028332	33.0002936922957	0.79044659644087
TGGT1_220910:E004	TGGT1_220910	E004	0.059565584519627	1.51640355610682e-05	0.000858522948147307	16.6863148121292	1.14857088924955
TGGT1_202470:E004	TGGT1_202470	E004	0.0619701488161657	1.52740696954474e-05	0.000862169332129426	16.038201506546	1.1895296942144
TGGT1_217350:E014	TGGT1_217350	E014	0.0279060159088323	1.52632288809414e-05	0.000862169332129426	35.6593948854375	0.751091381106156
TGGT1_278510:E001	TGGT1_278510	E001	0.00219768745020124	1.52683511079146e-05	0.000862169332129426	464.964455707581	0.204567450735554
TGGT1_288860:E025	TGGT1_288860	E025	0.0944188328972833	1.52662068153983e-05	0.000862169332129426	23.2721542933968	1.32952613090913
TGGT1_252380:E024	TGGT1_252380	E024	0.047038903752654	1.54581941893901e-05	0.000871911368076478	21.1358494788341	1.03409315267915
TGGT1_263330:E008	TGGT1_263330	E008	0.028934676324262	1.54910462156721e-05	0.000873112792746405	34.3889287626555	0.749543652733521
TGGT1_307770:E001	TGGT1_307770	E001	0.00279383391552752	1.60062632316563e-05	0.00090147942442254	363.488737961917	-0.184553603613126
TGGT1_290870:E008	TGGT1_290870	E008	0.0107479485641103	1.60571235016031e-05	0.000903670520102877	92.9179557649094	-0.44246294016234
TGGT1_316600:E004	TGGT1_316600	E004	0.00584634990340701	1.63191068336623e-05	0.00091773119992698	171.659418021422	0.30853139551369
TGGT1_240755:E002	TGGT1_240755	E002	0.0121831340878502	1.63397970385821e-05	0.000918211553732426	162.353905590822	0.341166380989925
TGGT1_288710:E007	TGGT1_288710	E007	0.0282095908557653	1.65605855989133e-05	0.000929927325956213	35.2748005281045	0.748217588197703
TGGT1_207460B:E021	TGGT1_207460B	E021	0.0187573019927711	1.67394952339323e-05	0.00093923117295203	53.1098965471661	0.610613723628324
TGGT1_253170:E005	TGGT1_253170	E005	0.0919274407581375	1.67511262091415e-05	0.00093923117295203	10.8081332864058	1.67703367438266
TGGT1_277030:E031	TGGT1_277030	E031	0.0970654658715366	1.67915802122116e-05	0.000940801494143351	10.2356525291285	1.68763623027732
TGGT1_265020:E013	TGGT1_265020	E013	0.0432133539108734	1.71913986835918e-05	0.000962489107632025	23.0096437706286	0.960668487087938
TGGT1_232450:E009	TGGT1_232450	E009	0.0229942407399629	1.72632040655819e-05	0.000965793848767439	43.2972455247213	0.672261493806828
TGGT1_298840:E008	TGGT1_298840	E008	0.00317342576866295	1.73675869600173e-05	0.000970914909476354	1414.8583781388	0.150075731062638
TGGT1_219070:E041	TGGT1_219070	E041	0.00953492735704662	1.74350260282309e-05	0.000973964624734477	104.816571360919	-0.428379310970953
TGGT1_319860:E023	TGGT1_319860	E023	0.106595496784607	1.74682858351227e-05	0.00097510190545808	21.0944147440594	1.42329959728074
TGGT1_214240:E006	TGGT1_214240	E006	0.0589915472033924	1.74989735287687e-05	0.000975374201512827	16.848858264475	1.24705902277037
TGGT1_314790:E002	TGGT1_314790	E002	0.00975433143562702	1.74942891629413e-05	0.000975374201512827	415.859962936536	0.168728524674293
TGGT1_267060:E004	TGGT1_267060	E004	0.00607911248233172	1.79438483795028e-05	0.000999434007531007	165.018738768504	-0.339400532223595
TGGT1_306310:E017	TGGT1_306310	E017	0.0627155144364102	1.79721045796628e-05	0.00100027069833584	15.8474001355014	1.26405734083925
TGGT1_240710:E009	TGGT1_240710	E009	0.00412048207567316	1.8043583707561e-05	0.0010035100395768	244.662458623311	0.266275644099251
TGGT1_278830:E028	TGGT1_278830	E028	0.00940605448719017	1.81516551408731e-05	0.00100877823445402	186.728410127962	0.39280711995912
TGGT1_321360:E014	TGGT1_321360	E014	0.0651209419248882	1.82307196628192e-05	0.0010124278130457	15.261470948499	1.34367303022105
TGGT1_262880:E021	TGGT1_262880	E021	0.100968656198747	1.83759671785688e-05	0.00101974475131467	27.7521196029827	1.33435202417218
TGGT1_214200:E011	TGGT1_214200	E011	0.057000613108974	1.84124922813679e-05	0.0010202829376711	17.43800377515	1.19341128017798
TGGT1_229440:E005	TGGT1_229440	E005	0.0184797418999638	1.84126634249343e-05	0.0010202829376711	53.9102882500187	0.596180057303074
TGGT1_206695:E001	TGGT1_206695	E001	0.00288750981628826	1.85302516811411e-05	0.00102529537522987	351.436595273855	0.162249699056614
TGGT1_280610:E032	TGGT1_280610	E032	0.101567412868052	1.85249793424171e-05	0.00102529537522987	9.78168176409643	1.68140112893021
TGGT1_297180:E008	TGGT1_297180	E008	0.0119428357681632	1.89368309492009e-05	0.00104702527929956	149.941540309292	0.442352183527033
TGGT1_243450:E007	TGGT1_243450	E007	0.0179887012660772	1.90237715743146e-05	0.00105106337948088	62.0802348914159	0.592774166134406
TGGT1_238140:E026	TGGT1_238140	E026	0.0145559664284713	1.91325110391372e-05	0.00105629908645732	68.5050424950947	0.529642646746582
TGGT1_224720:E009	TGGT1_224720	E009	0.0288760496436878	1.93226778585935e-05	0.00106524189490023	34.458899072213	0.738651860835213
TGGT1_282070:E018	TGGT1_282070	E018	0.0241086885221135	1.9311243114549e-05	0.00106524189490023	41.2906045384376	-0.714020469621741
TGGT1_247220:E002	TGGT1_247220	E002	0.00423624505312827	1.94790047895757e-05	0.00107307736152019	237.876867614955	-0.281044418221084
TGGT1_270360:E002	TGGT1_270360	E002	0.00805778330342575	1.95705005446446e-05	0.00107733253617286	124.181090328316	0.37142885133613
TGGT1_310050:E008	TGGT1_310050	E008	0.00120449377098908	1.97304383210512e-05	0.00108534642589643	869.265023530726	0.119259226748116
TGGT1_250220:E027	TGGT1_250220	E027	0.039962149348928	1.97795337625512e-05	0.00108646564014618	25.9922452834066	-0.902114263491747
TGGT1_258670:E004	TGGT1_258670	E004	0.00100789141010349	1.97746807124392e-05	0.00108646564014618	1049.99319921253	0.0265063213654615
TGGT1_290880:E010	TGGT1_290880	E010	0.16619111873641	1.99274566943184e-05	0.00109379595633259	5.97663195798444	2.56322480319105
TGGT1_219500:E016	TGGT1_219500	E016	0.00914745587399689	2.02358823855229e-05	0.00110991905839085	109.286865595526	0.403758365622639
TGGT1_278470:E013	TGGT1_278470	E013	0.0205826095103362	2.02922298437852e-05	0.00111220254971209	48.3857097818071	0.630916138890756
TGGT1_289070:E017	TGGT1_289070	E017	0.0646377113642826	2.03773973875247e-05	0.00111606119517673	15.3756755061475	-1.22071531092489
TGGT1_269200:E009	TGGT1_269200	E009	0.0711493886868185	2.07610958785861e-05	0.0011362528230958	13.9672424989864	1.34327825506105
TGGT1_258870A:E004	TGGT1_258870A	E004	0.000500833047642018	2.09018289930975e-05	0.0011431273798526	3871.89704172616	-0.0637333768571998
TGGT1_249810:E018	TGGT1_249810	E018	0.0139303982486672	2.0938459684537e-05	0.0011441295154366	71.595192006179	0.514035738374909
TGGT1_250780:E009	TGGT1_250780	E009	0.0323022464085619	2.09504280035491e-05	0.0011441295154366	30.7968930959769	0.798917507781005
TGGT1_205150:E026	TGGT1_205150	E026	0.0415513075832564	2.10169106712144e-05	0.00114625091289567	24.8057587792954	0.957425343598794
TGGT1_240070:E006	TGGT1_240070	E006	0.0183745895314932	2.10196047375485e-05	0.00114625091289567	54.2198501264345	0.615709755985896
TGGT1_207690:E004	TGGT1_207690	E004	0.0109355791273682	2.11267240879161e-05	0.00115126175920178	91.3145564732414	0.439879680431588
TGGT1_233838:E010	TGGT1_233838	E010	0.038091951754791	2.12655243503932e-05	0.0011579905341869	26.1083195629996	0.94771450725706
TGGT1_211420:E007	TGGT1_211420	E007	0.000343648213223901	2.1310923148437e-05	0.00115962720907499	23214.2418761734	-0.0337465643109649
TGGT1_219630:E014	TGGT1_219630	E014	0.0153192695554716	2.13802305067755e-05	0.00116089122281832	65.0777546077943	0.533680360157369
TGGT1_264820:E010	TGGT1_264820	E010	0.0626204213771227	2.13716369811928e-05	0.00116089122281832	15.8714893683878	1.17345808555066
TGGT1_272320:E018	TGGT1_272320	E018	0.0847976020004454	2.13556768767075e-05	0.00116089122281832	11.7175561941218	1.53091919783129
TGGT1_269425:E005	TGGT1_269425	E005	0.00450339735704875	2.20230342896829e-05	0.00119493537522097	223.567567854105	0.258488568252598
TGGT1_208740:E019	TGGT1_208740	E019	0.0137175285382811	2.20464657950229e-05	0.00119534862103258	72.7112787618648	-0.491611082798656
TGGT1_215740:E001	TGGT1_215740	E001	0.00332526737124247	2.2538948140624e-05	0.00122029998450189	360.233279029669	-0.202979709233941
TGGT1_309600:E021	TGGT1_309600	E021	0.000790993782424595	2.25344737552127e-05	0.00122029998450189	1362.51565986512	-0.0971182188510358
TGGT1_255670:E007	TGGT1_255670	E007	0.0117113382688651	2.25784592203455e-05	0.0012206903467755	85.2335438298449	0.445305906925583
TGGT1_299210:E011	TGGT1_299210	E011	0.0233680925149348	2.25727818636593e-05	0.0012206903467755	42.6027085501644	0.685762676016976
TGGT1_318400:E008	TGGT1_318400	E008	0.0585451955288889	2.26902576349776e-05	0.00122585779311428	16.977451638617	1.13323998071212
TGGT1_292080:E006	TGGT1_292080	E006	0.196840462593507	2.2770894484706e-05	0.00122933553353075	30.1344855667283	1.69613882863536
TGGT1_208740:E020	TGGT1_208740	E020	0.0479525506545852	2.30331559421041e-05	0.00124260670408002	20.7326214106834	-0.954936031517837
TGGT1_285210:E007	TGGT1_285210	E007	0.0556275924269929	2.33011137518456e-05	0.00125616603394579	17.8688973771245	1.13062949254747
TGGT1_202470:E001	TGGT1_202470	E001	0.00191753352433383	2.34177482179089e-05	0.00126065544573076	751.30476009446	-0.0632222564521126
TGGT1_304955:E033	TGGT1_304955	E033	0.00212424366114359	2.34151139314533e-05	0.00126065544573076	2276.32559607977	-0.109525799833862
TGGT1_280380:E011	TGGT1_280380	E011	0.000700860170801415	2.35004381432976e-05	0.00126330733694646	1554.8289706369	-0.104048632324881
TGGT1_306460:E002	TGGT1_306460	E002	0.042272575261614	2.34908233875976e-05	0.00126330733694646	23.5224802436035	0.943740244600071
TGGT1_225870:E006	TGGT1_225870	E006	0.00843113094211518	2.38043376674633e-05	0.00127873450574429	118.641179457365	-0.376221318802215
TGGT1_311060:E003	TGGT1_311060	E003	0.041054727355846	2.39334093189538e-05	0.00128475493121106	24.2213114076775	0.906201494076592
TGGT1_246050:E017	TGGT1_246050	E017	0.0309526366114514	2.4028479784947e-05	0.00128894290923056	32.1424192171478	0.796274773382744
TGGT1_217182:E022	TGGT1_217182	E022	0.0180295923233883	2.43321487467207e-05	0.00130430671388273	55.2609458239335	0.6014402501263
TGGT1_301310:E002	TGGT1_301310	E002	0.0633270466576846	2.47119008591349e-05	0.00132372423156282	15.694215424179	1.14113563698846
TGGT1_215170:E018	TGGT1_215170	E018	0.0158280286371548	2.50824614592028e-05	0.00134262223938347	62.9777028678928	0.534033359953797
TGGT1_270370:E009	TGGT1_270370	E009	0.00303909625523026	2.52069102201115e-05	0.00134806523030383	333.540653685965	-0.177992697928288
TGGT1_273070:E023	TGGT1_273070	E023	0.0197801849818075	2.52198173592868e-05	0.00134806523030383	50.3547764881167	0.614781694675225
TGGT1_264450:E013	TGGT1_264450	E013	0.034491065237329	2.53500044708949e-05	0.00135406645789341	28.8389730320712	0.843001216385097
TGGT1_217182:E025	TGGT1_217182	E025	0.00770950132878258	2.53892641105349e-05	0.00135520576271359	129.836740186605	0.382282650370926
TGGT1_214170:E009	TGGT1_214170	E009	0.171319118078143	2.56209997066516e-05	0.00136661002105021	5.79767172393739	2.56375537127183
TGGT1_304970:E013	TGGT1_304970	E013	0.0405445096377548	2.57932736883726e-05	0.00137482878132198	29.9538097753279	0.891246008898529
TGGT1_306460:E003	TGGT1_306460	E003	0.0732878484013963	2.60646833553524e-05	0.00138831634768446	13.5593469515829	1.31558653828388
TGGT1_291860:E007	TGGT1_291860	E007	0.0312269432168972	2.61960310073526e-05	0.00139432987013924	196.569551371511	0.549451936920725
TGGT1_236960:E013	TGGT1_236960	E013	0.00604755885131153	2.6319299183382e-05	0.00139856493834955	165.888695882167	-0.336322639472485
TGGT1_280610:E031	TGGT1_280610	E031	0.0896230930731999	2.63311093550238e-05	0.00139856493834955	11.086220260275	1.49828335348491
TGGT1_285810:E018	TGGT1_285810	E018	0.0875415834517738	2.63263420048201e-05	0.00139856493834955	11.3500092008343	1.51967826512961
TGGT1_205130:E007	TGGT1_205130	E007	0.00982768506087032	2.6668966379573e-05	0.00141551532085737	101.674270311537	0.417634419186142
TGGT1_242870:E029	TGGT1_242870	E029	0.12879464677945	2.68137414807384e-05	0.00142220084813837	7.71283044530626	1.9283531736708
TGGT1_312840:E013	TGGT1_312840	E013	0.161302748049393	2.68619336775641e-05	0.00142375783395347	6.15782711259251	2.18935334655664
TGGT1_228350:E009	TGGT1_228350	E009	0.196006619688548	2.73691663505258e-05	0.00144962602039624	5.0672090502685	13.1733596135691
TGGT1_250740:E003	TGGT1_250740	E003	0.0111555689751019	2.75113073430182e-05	0.00145613419579832	89.5037079419324	0.42606527970835
TGGT1_273360:E015	TGGT1_273360	E015	0.0611324905562917	2.75856575305194e-05	0.00145904770291933	16.2581865157692	1.15537796225784
TGGT1_249820:E014	TGGT1_249820	E014	0.20041554872226	2.76418289721059e-05	0.00146099630585294	4.9557011888306	13.3196410051437
TGGT1_267660:E017	TGGT1_267660	E017	0.183052867830472	2.77322698835279e-05	0.00146475221686709	5.42591256382595	2.6012896048129
TGGT1_210730:E011	TGGT1_210730	E011	0.0176664095992547	2.78678251227598e-05	0.00147088404918187	56.4010087198401	0.567241020224276
TGGT1_258880:E010	TGGT1_258880	E010	0.0249268863871448	2.83746252766733e-05	0.00149658822586289	39.9318909937565	-0.653509495966562
TGGT1_290710:E005	TGGT1_290710	E005	0.0236952521963788	2.84009400040312e-05	0.00149693155326687	42.0129441563917	0.671697891300743
TGGT1_250010:E010	TGGT1_250010	E010	0.0279048354566074	2.85258896639787e-05	0.00150037842211749	98.6265670950746	0.641082280314105
TGGT1_271100:E007	TGGT1_271100	E007	0.0521545614982204	2.85155248043305e-05	0.00150037842211749	19.0602298611928	1.03179023136073
TGGT1_280490:E018	TGGT1_280490	E018	0.0745518075586095	2.852154877046e-05	0.00150037842211749	13.3292681724308	1.31110595777413
TGGT1_263130:E010	TGGT1_263130	E010	0.0455811333314387	2.85599503911015e-05	0.00150112529239237	21.8127385139544	0.964865853767131
TGGT1_211850:E003	TGGT1_211850	E003	0.0361941702375446	2.89093708013972e-05	0.00151738059993833	42.427207884346	-0.728505691827282
TGGT1_320440B:E008	TGGT1_320440B	E008	0.0663713616017174	2.89082849347682e-05	0.00151738059993833	14.9736786638198	1.28710311271207
TGGT1_219770:E007	TGGT1_219770	E007	0.0147533685521649	2.89571902805727e-05	0.00151883577778366	67.5845500425854	0.502509430294973
TGGT1_311335:E021	TGGT1_311335	E021	0.00171101433857999	2.90722102075694e-05	0.00152381122878538	618.88656031231	-0.152599988664363
TGGT1_244240:E013	TGGT1_244240	E013	0.00983535182403453	2.91512091465486e-05	0.00152583565769698	101.594509090745	-0.421946385358705
TGGT1_270830:E006	TGGT1_270830	E006	0.00090414138715139	2.91338659120219e-05	0.00152583565769698	1179.39235414739	-0.0859403890754395
TGGT1_223810:E017	TGGT1_223810	E017	0.025541065341098	2.92157115663615e-05	0.00152815357204757	38.9693128427971	-0.693464581772815
TGGT1_278510:E011	TGGT1_278510	E011	0.00939096883071883	2.93319910940024e-05	0.00153317465481804	106.434079575735	0.417478553382219
TGGT1_408710:E001	TGGT1_408710	E001	0.0022224159553746	2.95181588564402e-05	0.00154183931077226	459.641712708045	-0.173194595080255
TGGT1_257300:E023	TGGT1_257300	E023	0.00364690191191246	2.99075218192801e-05	0.00156109828324919	276.985845466372	-0.25515686717549
TGGT1_278470:E009	TGGT1_278470	E009	0.0321382044466497	2.99600676202678e-05	0.00156276178804354	30.9543938396105	0.808065740559811
TGGT1_230340:E006	TGGT1_230340	E006	0.00230090462258997	3.00014979476201e-05	0.00156384359853588	864.662131873469	-0.160685291703742
TGGT1_272350:E014	TGGT1_272350	E014	0.026223806393361	3.00577307011593e-05	0.00156569497026535	37.952325377372	0.697979826718255
TGGT1_308090:E007	TGGT1_308090	E007	0.0616586282388204	3.03636212322036e-05	0.0015805394076945	16.1193139347661	-1.15073867410966
TGGT1_313180:E018	TGGT1_313180	E018	0.0540199609241059	3.09377397249104e-05	0.00160931606599324	53.8043316345328	0.929316386343417
TGGT1_300220:E015	TGGT1_300220	E015	0.0226777274833699	3.10191604102073e-05	0.00161244166583513	43.9032096150493	0.65794903221467
TGGT1_271790:E002	TGGT1_271790	E002	0.00517881440144396	3.11832003223196e-05	0.00161985474004231	194.055170974395	0.270015032686103
TGGT1_313775:E006	TGGT1_313775	E006	0.139146933878735	3.16837627960281e-05	0.00164472675800096	7.13875250115838	-0.960849708874889
TGGT1_301270:E002	TGGT1_301270	E002	0.0430770181947053	3.18103705129006e-05	0.00165016569945508	23.0825730971406	0.924979001096779
TGGT1_250220:E010	TGGT1_250220	E010	0.00634780675396742	3.18613453383676e-05	0.00165158365012608	557.860637613581	0.303764181276342
TGGT1_270070:E010	TGGT1_270070	E010	0.0269754962806419	3.18814075511887e-05	0.00165158365012608	36.8923118350267	0.693425473237215
TGGT1_271145:E060	TGGT1_271145	E060	0.0923491542012703	3.20630758181172e-05	0.00165872101059886	10.7587445202663	1.93241116161528
TGGT1_295760:E019	TGGT1_295760	E019	0.127085279057736	3.20419776853452e-05	0.00165872101059886	7.81662316764389	1.74536454763495
TGGT1_264820:E013	TGGT1_264820	E013	0.0510682517637739	3.21640081268948e-05	0.00166280442014156	19.4661688215203	1.01739659990861
TGGT1_263505:E010	TGGT1_263505	E010	0.0616508352732434	3.21983945399433e-05	0.00166344433090772	16.12135355475	1.0773445768713
TGGT1_268580:E017	TGGT1_268580	E017	0.0160686835349122	3.22747476300013e-05	0.00166624998317675	62.0308388371971	0.51716811296371
TGGT1_230500:E004	TGGT1_230500	E004	0.0222073018964059	3.24957513235151e-05	0.00167651459149073	44.8358430730793	-0.629778305973185
TGGT1_222800:E023	TGGT1_222800	E023	0.0674833533032635	3.27442774776564e-05	0.00168703338808195	14.726714260436	1.22511676478113
TGGT1_262490:E003	TGGT1_262490	E003	0.00178245164129396	3.27360604309488e-05	0.00168703338808195	577.202856329619	-0.151584793963519
TGGT1_300290:E002	TGGT1_300290	E002	0.00284448048488494	3.27782544007314e-05	0.00168763353141423	356.871880694134	0.159011044752125
TGGT1_271100:E006	TGGT1_271100	E006	0.0692698466497635	3.29180288508527e-05	0.00169367628087484	14.3465654362861	1.22421327366348
TGGT1_221720:E002	TGGT1_221720	E002	0.0654642850613949	3.31316466112871e-05	0.00170350756066279	15.1813522902773	-1.15095515471275
TGGT1_236240:E014	TGGT1_236240	E014	0.0075931236589357	3.33616013526802e-05	0.00171416489016878	131.843167040486	0.356863881733101
TGGT1_260830:E003	TGGT1_260830	E003	0.025981928820573	3.36491363785603e-05	0.0017277642838073	38.3064896865963	-0.657923979200058
TGGT1_249730:E011	TGGT1_249730	E011	0.0168331260916921	3.38633152041605e-05	0.00173695580469954	59.2033727559826	0.555691981349771
TGGT1_313590A:E026	TGGT1_313590A	E026	0.0414104239406815	3.38741083343537e-05	0.00173695580469954	24.0129480845943	0.950355935067348
TGGT1_300340:E014	TGGT1_300340	E014	0.0171263358257754	3.43648483827808e-05	0.00176092472574057	58.1860882299296	0.521889832917501
No_genes_on_ref_contig_396+No_genes_on_ref_contig_397+No_genes_on_ref_contig_400+No_genes_on_ref_contig_398+No_genes_on_ref_contig_399+No_genes_on_ref_contig_402+No_genes_on_ref_contig_401+No_genes_on_ref_contig_403:E011	No_genes_on_ref_contig_396+No_genes_on_ref_contig_397+No_genes_on_ref_contig_400+No_genes_on_ref_contig_398+No_genes_on_ref_contig_399+No_genes_on_ref_contig_402+No_genes_on_ref_contig_401+No_genes_on_ref_contig_403	E011	0.0103451374106398	3.44905919759887e-05	0.00176577296175447	96.5578360723494	-0.428851939232228
TGGT1_252380:E017	TGGT1_252380	E017	0.0242463123959362	3.4506187511727e-05	0.00176577296175447	53.5249664570978	0.641320104690424
TGGT1_236620:E010	TGGT1_236620	E010	0.0204876023968656	3.47813533685176e-05	0.0017777464595916	48.610772836927	0.603727510849624
TGGT1_313480:E031	TGGT1_313480	E031	0.0834503447830219	3.47872114225078e-05	0.0017777464595916	11.906870590842	1.46680524109954
TGGT1_304710:E005	TGGT1_304710	E005	0.0599437899398242	3.49556089296429e-05	0.00178514515818937	54.7603400702384	0.8971446610078
TGGT1_243280A:E004	TGGT1_243280A	E004	0.0402267953765322	3.52949837893876e-05	0.00180125959808879	24.7205977935793	0.932265644088584
TGGT1_268400:E010	TGGT1_268400	E010	0.0546145761778913	3.56760033983384e-05	0.00181947617331526	18.2007162547122	1.00192669413804
TGGT1_263100:E028	TGGT1_263100	E028	0.008535856785491	3.60734043255343e-05	0.0018385030652276	117.174881300118	0.384963890445326
TGGT1_219260A:E021	TGGT1_219260A	E021	0.118862577550497	3.61576923875225e-05	0.00184155707953755	8.35764669739002	1.8447394724713
TGGT1_241880:E010	TGGT1_241880	E010	0.0637447705974854	3.63413033196485e-05	0.00184966221380853	15.5912695609228	1.20733992136713
TGGT1_204050:E017	TGGT1_204050	E017	0.012476833772321	3.6377365216025e-05	0.00185025169431871	472.779378153141	0.39592918222323
TGGT1_207100:E021	TGGT1_207100	E021	0.0458835697561318	3.64588885259471e-05	0.00185315111806869	21.6687668810621	1.01581224318508
TGGT1_222140:E016	TGGT1_222140	E016	0.157150043538233	3.69835160475954e-05	0.00187855383730468	6.32061277466466	2.50885368180157
TGGT1_316730:E011	TGGT1_316730	E011	0.146575118433792	3.71390972904332e-05	0.00188518955769343	6.77681855888914	2.20940230517715
TGGT1_267120:E003	TGGT1_267120	E003	0.00420263570694087	3.73426990186924e-05	0.00189425226659786	239.807831187758	-0.222201158666288
TGGT1_310045:E013	TGGT1_310045	E013	0.0103933936089875	3.77731489398976e-05	0.00191480224223698	96.1068186948426	-0.419719671268844
TGGT1_290330:E019	TGGT1_290330	E019	0.049307970501518	3.78704616774138e-05	0.00191716358640475	20.1619846034048	0.98331210903367
TGGT1_304955:E018	TGGT1_304955	E018	0.0121964884631044	3.78463520062839e-05	0.00191716358640475	403.951770115502	0.415024548656964
TGGT1_205540:E014	TGGT1_205540	E014	0.160856076752606	3.79357375453529e-05	0.00191918267413177	6.17493302456933	2.19643176609606
TGGT1_288010:E002	TGGT1_288010	E002	0.00458913124651988	3.81301872518138e-05	0.00192772964071344	219.333433728473	0.248081965258478
TGGT1_242070:E013	TGGT1_242070	E013	0.0107348418418008	3.85540807513074e-05	0.00194785730704901	97.1393274303699	-0.392145668241285
TGGT1_223270:E007	TGGT1_223270	E007	0.0264459355448001	3.87518845662516e-05	0.00195654304561552	37.632797396451	0.672874161350226
TGGT1_319870:E004	TGGT1_319870	E004	0.0191144267349869	3.87795545460355e-05	0.00195663303851699	75.8078018807739	-0.558319230005319
TGGT1_235920:E023	TGGT1_235920	E023	0.0120300353134431	3.88713344362326e-05	0.00195995543653057	82.9638060121708	0.457044256968201
TGGT1_314240:E018	TGGT1_314240	E018	0.0363296755472162	3.98022853957121e-05	0.00200555755651914	27.3769539150817	0.83943504386233
TGGT1_249810:E026	TGGT1_249810	E026	0.0134201223191998	3.99231863454372e-05	0.00201030930736898	74.3301613363561	0.481966053951183
TGGT1_253430:E018	TGGT1_253430	E018	0.000813614314245652	4.01379590679277e-05	0.00201977844358996	2430.6326822663	0.103979380869162
TGGT1_316730:E025	TGGT1_316730	E025	0.137882831951509	4.03336872965551e-05	0.00202827728093694	7.20422974914277	1.9282599653083
TGGT1_275750:E001	TGGT1_275750	E001	0.00155564709220421	4.04683248284151e-05	0.00203234347321015	664.865014386824	-0.142304312057024
TGGT1_313860:E008	TGGT1_313860	E008	0.0532682426855283	4.04552190122527e-05	0.00203234347321015	18.661270490927	1.02174858819113
TGGT1_263740:E032	TGGT1_263740	E032	0.013776755139309	4.08011174789604e-05	0.00204769592383452	72.3972718285722	-0.481051291484357
TGGT1_244860:E011	TGGT1_244860	E011	0.0686582600652288	4.09239463812267e-05	0.00205249748864358	14.47447623059	1.2076084084975
TGGT1_253020:E009	TGGT1_253020	E009	0.0801201048381711	4.10306691149962e-05	0.00205648543305679	12.4021717508346	1.3404790287904
TGGT1_274190:E007	TGGT1_274190	E007	0.0799889615179487	4.15864036016e-05	0.0020829579569358	12.422521174152	1.30387450004252
TGGT1_292330:E009	TGGT1_292330	E009	0.0165813350002061	4.2034870564377e-05	0.00210402621655413	60.1057777178894	0.540964770334736
TGGT1_211480:E012	TGGT1_211480	E012	0.0556976581488424	4.25500284620433e-05	0.00212840254878766	17.8463937630728	1.06352469142757
TGGT1_223920:E030	TGGT1_223920	E030	0.0239531380317026	4.27869268589329e-05	0.002138725840911	41.5594426183504	-0.677667488248734
TGGT1_263630:E007	TGGT1_263630	E007	0.00112854051909889	4.28130004140978e-05	0.002138725840911	931.185337749416	-0.116277428145247
TGGT1_226590:E005	TGGT1_226590	E005	0.0134943714122251	4.29871960805055e-05	0.00214362236730298	185.87420658434	-0.43400453354844
TGGT1_276100:E003	TGGT1_276100	E003	0.0657933611108491	4.29832982646672e-05	0.00214362236730298	15.1053483822146	1.13852830370173
TGGT1_305290:E006	TGGT1_305290	E006	0.0328249070059995	4.29961036864773e-05	0.00214362236730298	30.3055918333689	0.775195786651504
TGGT1_233110:E016	TGGT1_233110	E016	0.0429030738895033	4.32189667698402e-05	0.00215331308266187	23.1762940881036	0.911651415289421
TGGT1_254010:E005	TGGT1_254010	E005	0.0155216394634057	4.33170236320425e-05	0.00215677686439858	64.2258580688621	0.517312752086866
TGGT1_209020:E014	TGGT1_209020	E014	0.0638492427796458	4.38846625615323e-05	0.002183430975309	15.5657337186255	1.1809988187477
TGGT1_219070:E040	TGGT1_219070	E040	0.00674209112393464	4.39101251947511e-05	0.002183430975309	148.640459071008	-0.340170659247748
TGGT1_214300:E016	TGGT1_214300	E016	0.0227872353004064	4.39545616618906e-05	0.00218420360258318	43.6916473262497	0.64166985997305
TGGT1_316100:E015	TGGT1_316100	E015	0.0556548497610351	4.39881230113441e-05	0.00218443515994968	17.8601361620602	1.04752348838202
TGGT1_272770:E006	TGGT1_272770	E006	0.0371017738373682	4.40178551051864e-05	0.00218447637856875	26.8062739684003	0.811093918907292
TGGT1_222410:E029	TGGT1_222410	E029	0.00168128181758567	4.40965130629086e-05	0.00218694399627346	613.271577697766	-0.147040767155991
TGGT1_222120:E004	TGGT1_222120	E004	0.0389379417435847	4.4476800437597e-05	0.00220435772503243	25.5401652716585	-0.847652203866038
TGGT1_237195:E005	TGGT1_237195	E005	0.0459733033943199	4.45308058786984e-05	0.00220558805368531	21.6264150246798	-0.931782294594117
TGGT1_301390:E003	TGGT1_301390	E003	0.0517428621643661	4.49413386869862e-05	0.00222446382491145	19.2120679950975	0.993967450128149
TGGT1_252380:E011	TGGT1_252380	E011	0.00114032457695607	4.53758106867052e-05	0.00224449903358806	921.00664040543	-0.0932017096881895
TGGT1_286220:E021	TGGT1_286220	E021	0.110689860785322	4.61263873836567e-05	0.00227917707123497	8.97507569309187	1.50176190992853
TGGT1_315130:E003	TGGT1_315130	E003	0.0959746966465392	4.61371876768212e-05	0.00227917707123497	10.3520580433192	1.47694675701364
TGGT1_255240:E027	TGGT1_255240	E027	0.023378146867009	4.6664383849328e-05	0.00230371486616585	42.5843372608229	0.640307425584531
TGGT1_217182:E019	TGGT1_217182	E019	0.0238973771536573	4.72625265675253e-05	0.00233172081137513	41.6566685912839	-0.650817660118592
TGGT1_285240:E013	TGGT1_285240	E013	0.0300429721638983	4.7325151707084e-05	0.00233328742095553	40.7648874327419	0.702706258403057
TGGT1_216880:E007	TGGT1_216880	E007	0.0106734784807713	4.74975259687145e-05	0.00234025945747547	276.142470057009	-0.380317093046477
TGGT1_265520:E005	TGGT1_265520	E005	0.00340949237275583	4.77406744090769e-05	0.00235070726591977	349.737985468476	-0.227004761798256
TGGT1_266970:E019	TGGT1_266970	E019	0.00358568653348209	4.78133924963526e-05	0.00235275509873654	281.798167974124	0.235522546867225
TGGT1_311920:E012	TGGT1_311920	E012	0.152696368461657	4.79347041361364e-05	0.00235718985557415	6.50504047962271	2.44186240125394
TGGT1_235680:E023	TGGT1_235680	E023	0.0112894272215097	4.80334715249779e-05	0.00236051095240629	88.4365798763901	0.442145550440034
No_genes_on_ref_contig_268+No_genes_on_ref_contig_269+No_genes_on_ref_contig_272+No_genes_on_ref_contig_271+No_genes_on_ref_contig_270:E004	No_genes_on_ref_contig_268+No_genes_on_ref_contig_269+No_genes_on_ref_contig_272+No_genes_on_ref_contig_271+No_genes_on_ref_contig_270	E004	0.00025928687407963	4.81068321091315e-05	0.00236257997691513	5039.7480077606	0.03931071107411
TGGT1_270840:E014	TGGT1_270840	E014	0.0991450925528204	4.87942472058463e-05	0.00239478363137161	10.8322068208634	1.51404881932397
TGGT1_246050:E018	TGGT1_246050	E018	0.0392034913934018	4.88983301786674e-05	0.00239833458245558	25.3668905872454	0.876295182450425
TGGT1_211440:E014	TGGT1_211440	E014	0.0439031985937737	5.05722023350892e-05	0.00247492497221278	22.6475829595186	0.949894380538431
TGGT1_214090:E020	TGGT1_214090	E020	0.00993182664531398	5.05398127361262e-05	0.00247492497221278	100.601423253571	0.417928389424512
TGGT1_246220:E004	TGGT1_246220	E004	0.0164954645269202	5.05029619201129e-05	0.00247492497221278	60.4198562188514	0.536422414085204
TGGT1_282055:E013	TGGT1_282055	E013	0.0042305220549449	5.05908692819553e-05	0.00247492497221278	238.203472255751	-0.272694279901729
TGGT1_221590:E010	TGGT1_221590	E010	0.00839142414370634	5.06854927863559e-05	0.00247795013957203	119.206766797608	-0.381019112293716
TGGT1_264440:E008	TGGT1_264440	E008	0.0353290199615901	5.11083828306948e-05	0.0024970095611568	28.1537452454304	0.798746322326632
TGGT1_217530:E006	TGGT1_217530	E006	0.00819708658692714	5.11858687826761e-05	0.00249917980254019	122.054571093422	0.367421521601575
TGGT1_288710:E005	TGGT1_288710	E005	0.0258903488000214	5.17091084826272e-05	0.00252309737723301	38.442315111268	0.673820161035876
TGGT1_293390:E002	TGGT1_293390	E002	0.0183425873116105	5.19419280182549e-05	0.00253282245385532	54.3147694867775	0.539870506334508
TGGT1_242720:E009	TGGT1_242720	E009	0.0186329614940517	5.23249811496303e-05	0.00254985604464949	65.7491285043731	0.541643557040906
TGGT1_225300:E017	TGGT1_225300	E017	0.0165821400683141	5.27212230445163e-05	0.00256750997432386	60.1028485629534	0.543514307677846
TGGT1_319910:E007	TGGT1_319910	E007	0.0558947805741554	5.31294601697899e-05	0.00258572495721382	17.7833852275249	1.03826923556083
TGGT1_222660:E051	TGGT1_222660	E051	0.0142114267679578	5.33601596716287e-05	0.00259528158835331	71.3720581491895	0.492315874725888
TGGT1_270090:E021	TGGT1_270090	E021	0.0157418797049285	5.34998085718932e-05	0.00260040034178832	63.3237231857654	0.515642604891572
TGGT1_269430:E053	TGGT1_269430	E053	0.00876055746131986	5.37628671708743e-05	0.00261150708644539	114.14793032671	-0.375299147923544
TGGT1_290910:E003	TGGT1_290910	E003	0.0441535648017265	5.39279793385133e-05	0.00261784491609731	22.5189818351007	0.93946614999196
TGGT1_263330:E009	TGGT1_263330	E009	0.0421070327511029	5.4741666921328e-05	0.00265563842698833	23.6150951289621	0.864817341439235
TGGT1_248630:E015	TGGT1_248630	E015	0.0114572923772501	5.53842375123388e-05	0.00268508751741988	87.1337806294243	0.434410377040132
TGGT1_265010:E007	TGGT1_265010	E007	0.0345478515063722	5.56015755314246e-05	0.00269389633449752	28.7914848401864	0.748247147220247
TGGT1_244390:E011	TGGT1_244390	E011	0.0256572497635382	5.56380752727067e-05	0.00269393786371667	38.7924176858075	0.677542254463273
TGGT1_222210:E017	TGGT1_222210	E017	0.0425394137464054	5.64955295103608e-05	0.00273370365649942	23.3747136296138	0.857706821199175
TGGT1_242660:E005	TGGT1_242660	E005	0.0241530675208859	5.72312557137558e-05	0.00276753216209667	97.6175111909179	-0.56351881122755
TGGT1_266920:E008	TGGT1_266920	E008	0.0106623944507146	5.72902087311405e-05	0.00276861160889838	93.6679013903552	0.424384041358889
TGGT1_214230:E023	TGGT1_214230	E023	0.0663232994277256	5.77792054017825e-05	0.00279045872375561	14.9845397628418	1.17439640616883
TGGT1_217020:E025	TGGT1_217020	E025	0.0033886012491535	5.78354507560858e-05	0.0027913914681012	298.494747139386	-0.233306659740919
TGGT1_223855:E029	TGGT1_223855	E029	0.00815755649766253	5.79568077918271e-05	0.00279368076946548	122.65057606277	0.344352799951663
TGGT1_271145:E026	TGGT1_271145	E026	0.0715694444970447	5.79291157076075e-05	0.00279368076946548	13.8851944834732	1.42849870007377
TGGT1_255635:E020	TGGT1_255635	E020	0.027536746294152	5.81072979838839e-05	0.00279736674918338	36.1386736601243	0.68630540372275
TGGT1_263630:E005	TGGT1_263630	E005	0.000969631192824863	5.81025713627466e-05	0.00279736674918338	1094.26794115497	-0.102079753691435
TGGT1_207100:E013	TGGT1_207100	E013	0.00730026002994187	5.87294539650803e-05	0.00282376172232436	137.177810231352	0.325307143598595
TGGT1_295910:E011	TGGT1_295910	E011	0.00138030083061895	5.87302985829153e-05	0.00282376172232436	753.316681058628	-0.11686171712617
TGGT1_233090:E012	TGGT1_233090	E012	0.0508218955298427	5.88233306610337e-05	0.00282643673110124	32.8685267189905	0.878298114537273
TGGT1_201770:E014	TGGT1_201770	E014	0.0132806350247893	5.88866623685383e-05	0.00282768215701325	75.1145334491257	0.466853973911092
TGGT1_250100:E005	TGGT1_250100	E005	0.0216625174726093	5.95577908323915e-05	0.00285809329948814	622.420982123211	0.498285882885343
TGGT1_255215:E003	TGGT1_255215	E003	0.00219546755474305	5.96792920545624e-05	0.00286210675892635	465.448318455186	0.119197988797246
TGGT1_239700:E021	TGGT1_239700	E021	0.032004823637157	6.00129645644201e-05	0.00287628401249715	31.0836484628139	0.779521595103436
TGGT1_254420:E011	TGGT1_254420	E011	0.020203923208145	6.06936040779483e-05	0.00290706209342173	49.2954171299876	0.585731781042714
TGGT1_229990:E003	TGGT1_229990	E003	0.00988669705866987	6.10613306616261e-05	0.00292282298547627	101.063547188258	0.39352060186687
TGGT1_257390:E010	TGGT1_257390	E010	0.0403727732643676	6.14442882471849e-05	0.00293929252803717	24.6310761852179	0.935153488783346
TGGT1_205130:E011	TGGT1_205130	E011	0.0246827320024351	6.17561621916245e-05	0.0029523429796125	40.3278847080642	0.650620936219253
TGGT1_243545:E002	TGGT1_243545	E002	0.000341773504999421	6.19063886174509e-05	0.00295765402306206	3552.39976504025	0.0376368609252508
TGGT1_244310:E014	TGGT1_244310	E014	0.0420345149885386	6.30711221453175e-05	0.00301139706505836	23.6558962359755	0.871202440124413
TGGT1_217020:E010	TGGT1_217020	E010	0.0117139252661261	6.31375215668442e-05	0.00301266423930885	85.2146195627619	0.444364662271303
TGGT1_315780:E021	TGGT1_315780	E021	0.00120338054490968	6.32127106162408e-05	0.00301434895507679	870.11305057865	-0.114489712293243
TGGT1_201780:E003	TGGT1_201780	E003	0.00040499123001403	6.32847966832736e-05	0.00301543401230302	4870.82449500747	-0.0431945233386208
TGGT1_285680:E004	TGGT1_285680	E004	0.0357047280493603	6.33152573036556e-05	0.00301543401230302	27.8569758359157	0.762061874315934
TGGT1_236070:E002	TGGT1_236070	E002	0.0486530292476356	6.33588861532636e-05	0.00301561167080351	20.4337423820299	0.953858003922555
TGGT1_270530:E024	TGGT1_270530	E024	0.073351253636568	6.34768792490771e-05	0.00301932629792558	13.5476162166692	1.23342747877246
TGGT1_215940:E024	TGGT1_215940	E024	0.0820233118690395	6.39588211589786e-05	0.00304033686845152	12.1141824655276	1.3494881232537
TGGT1_227948:E023	TGGT1_227948	E023	0.0154865565347996	6.42802821643901e-05	0.00305369722598927	64.3719414482565	0.516686195031098
TGGT1_310530:E016	TGGT1_310530	E016	0.09527160722015	6.43622072866446e-05	0.00305566856227335	10.4285045677345	1.56284908230803
TGGT1_318330:E006	TGGT1_318330	E006	0.0773707524138833	6.46059371764026e-05	0.00306531446557869	12.8432351638512	1.29234486748151
TGGT1_271380:E007	TGGT1_271380	E007	0.0361292204373816	6.53904853547625e-05	0.00310059201009012	27.5291112495762	0.793861978798385
TGGT1_313480:E007	TGGT1_313480	E007	0.030000973379805	6.57078485226599e-05	0.00311368690096532	79.6754759649273	0.631794547052832
No_genes_on_ref_contig_268+No_genes_on_ref_contig_269+No_genes_on_ref_contig_272+No_genes_on_ref_contig_271+No_genes_on_ref_contig_270:E007	No_genes_on_ref_contig_268+No_genes_on_ref_contig_269+No_genes_on_ref_contig_272+No_genes_on_ref_contig_271+No_genes_on_ref_contig_270	E007	0.000507574506643638	6.6242456690672e-05	0.00313705348470825	2229.71417554514	0.0725558130188504
TGGT1_236580:E005	TGGT1_236580	E005	0.00612502036965019	6.66708188885924e-05	0.00315536245036794	163.769195696005	-0.310912429613687
TGGT1_232350:E005	TGGT1_232350	E005	0.0350057528768023	6.67908233599082e-05	0.00315906383678885	28.4141995466388	-0.793114704674241
TGGT1_275630:E024	TGGT1_275630	E024	0.0868799640992059	6.74844981807975e-05	0.00318987701157038	11.4365052341198	1.34577324372854
TGGT1_316100:E014	TGGT1_316100	E014	0.0469572373778335	6.78175275831427e-05	0.00320361523111818	21.1726570187623	0.914493410544564
TGGT1_229780:E010	TGGT1_229780	E010	0.0464994442710531	6.84634782502272e-05	0.00323009151879443	21.3813841344799	0.929566115734011
TGGT1_320150:E015	TGGT1_320150	E015	0.236995480584552	6.84457700351348e-05	0.00323009151879443	4.19059436788061	2.62388297167431
TGGT1_263595:E003	TGGT1_263595	E003	0.011932679902401	6.85692345982436e-05	0.00323306293786928	83.6442356521079	0.43087035956189
TGGT1_228350:E008	TGGT1_228350	E008	0.0951186828984613	6.87173123340512e-05	0.00323802487583058	10.4452816795567	1.49410571643954
TGGT1_310560:E014	TGGT1_310560	E014	0.0730870532831971	6.90136137370735e-05	0.00324996071867632	48.1156335276318	0.987121394606194
TGGT1_211350:E005	TGGT1_211350	E005	0.0281860793991704	6.9229897484746e-05	0.0032581158852379	35.3042902061476	-0.682405917879009
TGGT1_316230:E026	TGGT1_316230	E026	0.0320154259803229	7.08525238186759e-05	0.00333240538597583	31.0733346284599	0.741899412983224
TGGT1_319500:E017	TGGT1_319500	E017	0.00763506976161057	7.1416581802063e-05	0.00335684582447981	131.112880919448	0.349931074358114
TGGT1_295620:E006	TGGT1_295620	E006	0.0237628589209649	7.15828323015419e-05	0.00336256906837485	41.8931007999541	0.624991262452468
TGGT1_312420:E008	TGGT1_312420	E008	0.0107521449983257	7.16955460035176e-05	0.0033657718994024	96.7403829085962	-0.419336522003702
TGGT1_271870:E010	TGGT1_271870	E010	0.0310698223117977	7.22645974419223e-05	0.00339038038724728	32.0209445371079	0.727367410750128
TGGT1_222660:E007	TGGT1_222660	E007	0.182477955133372	7.24312688167438e-05	0.00339609191048829	5.44301321011605	2.46736438559801
TGGT1_356300:E002	TGGT1_356300	E002	0.0239300698169966	7.28617152577974e-05	0.00341415633144132	41.5996098037438	0.630608137384329
TGGT1_314860:E013	TGGT1_314860	E013	0.0549839849656009	7.29399166909091e-05	0.00341570308756648	23.2355694591366	0.978541115130507
TGGT1_223070:E007	TGGT1_223070	E007	0.00261755564162983	7.29935003250718e-05	0.00341609581521336	388.564325549325	-0.160621789369963
TGGT1_239930:E009	TGGT1_239930	E009	0.0340288266464725	7.36644424806435e-05	0.00344536255666584	29.2314322471201	0.770134927970433
TGGT1_200330:E038	TGGT1_200330	E038	0.011070061750478	7.39124961002625e-05	0.00345482639471246	217.618379434439	0.384819426872703
TGGT1_227620:E001	TGGT1_227620	E001	0.000123876090122102	7.40980927560199e-05	0.00346093858721386	65830.9627230119	0.00731247931975152
TGGT1_289300:E003	TGGT1_289300	E003	0.0167637011796696	7.41766408502561e-05	0.00346093858721386	59.4494708355003	-0.513147554018781
TGGT1_313910:E008	TGGT1_313910	E008	0.00414194118736031	7.41806317811973e-05	0.00346093858721386	243.375530087821	0.256424057346879
TGGT1_237530:E007	TGGT1_237530	E007	0.2270091597144	7.46230258485798e-05	0.00347943093133088	4.37499266891591	15.1229326854565
TGGT1_243450:E002	TGGT1_243450	E002	0.0178256661432949	7.53959441660151e-05	0.00351330225151403	198.74390158648	0.462012100605058
TGGT1_224480:E003	TGGT1_224480	E003	0.0228789013828615	7.54883661874996e-05	0.00351544158544892	43.5161155866833	0.620062636196163
TGGT1_269200:E012	TGGT1_269200	E012	0.182494592761506	7.57119782875816e-05	0.00352368395500739	5.44251681325635	2.47125380079518
TGGT1_254490:E026	TGGT1_254490	E026	0.0193363522574879	7.62676811287702e-05	0.00354736238466136	51.5143182476701	0.560785745787216
TGGT1_286140:E002	TGGT1_286140	E002	0.00711225592226988	7.64295705946328e-05	0.00355270590693945	140.835974918515	-0.320415333477993
TGGT1_295760:E012	TGGT1_295760	E012	0.0414677731286629	7.68426457664548e-05	0.0035697116486295	23.9796886593746	0.858930815008354
TGGT1_210980:E014	TGGT1_210980	E014	0.00143808689442568	7.71837760627074e-05	0.00357527659492784	964.350279520248	-0.101326888191148
TGGT1_275802:E008	TGGT1_275802	E008	0.0222055010806295	7.71989548162557e-05	0.00357527659492784	44.8394893842678	0.62633605562472
TGGT1_285800:E015	TGGT1_285800	E015	0.0289217236691273	7.71960468286119e-05	0.00357527659492784	34.4043631508	0.70363826077637
TGGT1_293540:E002	TGGT1_293540	E002	0.0227944327219639	7.7127591642027e-05	0.00357527659492784	43.6778137427371	0.610383234781675
[TGGT1_276820,TGGT1_276810]:E011	[TGGT1_276820,TGGT1_276810]	E011	0.0140412881662093	7.71583373922916e-05	0.00357527659492784	71.0272560039587	0.456680553814459
TGGT1_271145:E024	TGGT1_271145	E024	0.0730716417574264	7.7359163111393e-05	0.00358050230635965	13.5995009896603	1.42452989006679
TGGT1_260990:E002	TGGT1_260990	E002	0.0976544339893774	7.76888853882335e-05	0.00359136473113974	10.1738804251183	1.44205968154842
TGGT1_295850:E004	TGGT1_295850	E004	0.0528609534059244	7.76609500827156e-05	0.00359136473113974	18.8052236280618	0.996121291666983
TGGT1_257380:E012	TGGT1_257380	E012	0.0103037512487256	7.8009240140847e-05	0.00360396967501559	96.9480296423056	-0.41686368525231
TGGT1_220630:E012	TGGT1_220630	E012	0.00460155682412179	7.8659471642719e-05	0.00363178997293829	738.91563650332	0.225075264674886
TGGT1_208010:E005	TGGT1_208010	E005	0.0128086559046251	7.88006385017707e-05	0.00363608660515314	77.8959104733979	0.436938286933299
TGGT1_214490:E011	TGGT1_214490	E011	0.0881822893273607	7.90690116194528e-05	0.00364402075379359	11.2674851837192	1.28956011557391
TGGT1_294180:E009	TGGT1_294180	E009	0.0217744443925174	7.90571487201969e-05	0.00364402075379359	45.7296980643575	0.596570498848795
TGGT1_215590:E025	TGGT1_215590	E025	0.107008914236757	7.93568822627863e-05	0.00365505903423883	9.28398464137605	1.52767731650674
TGGT1_237530:E009	TGGT1_237530	E009	0.110397553305762	7.96253798108534e-05	0.00366519211745671	8.99885305416272	1.69124367066221
TGGT1_268400:E011	TGGT1_268400	E011	0.064304111109485	7.97522429124789e-05	0.00366879733646438	15.4555195698475	1.05578499414148
TGGT1_304700:E013	TGGT1_304700	E013	0.0270406793821223	8.04567482234006e-05	0.00369895495390576	36.8031755296053	0.661708847738303
TGGT1_273200:E011	TGGT1_273200	E011	0.0212295437349443	8.22107912916262e-05	0.00377729849690194	67.6256509852738	0.549242302970195
TGGT1_260210:E014	TGGT1_260210	E014	0.0849083742270964	8.2364280227771e-05	0.00378205165745771	11.7022581450653	1.33281563308577
TGGT1_220160:E007	TGGT1_220160	E007	0.0305443309616417	8.24967728508559e-05	0.00378500293003768	32.5729653494923	0.718627758116124
TGGT1_258000:E003	TGGT1_258000	E003	0.140815463077584	8.25287082731615e-05	0.00378500293003768	7.05412765435026	1.84877454141886
TGGT1_237470:E016	TGGT1_237470	E016	0.0337938634786182	8.27282854942323e-05	0.00379185522997275	29.4350488036143	-0.761715642666297
TGGT1_279540:E050	TGGT1_279540	E050	0.00117092338054155	8.32589974239311e-05	0.00381386760199731	895.586770621661	-0.109859536699176
TGGT1_297530:E020	TGGT1_297530	E020	0.24868567885814	8.42331550923071e-05	0.0038542409579521	3.99355387106948	14.4360255077721
TGGT1_313590A:E010	TGGT1_313590A	E010	0.106670374764753	8.42423601192993e-05	0.0038542409579521	9.31346640928193	1.62319373749318
TGGT1_258670:E001	TGGT1_258670	E001	0.0204384384745724	8.65285436481502e-05	0.0039540181874108	48.7280616603957	-0.573770212690613
TGGT1_271145:E028	TGGT1_271145	E028	0.0987709951777523	8.65727198223452e-05	0.0039540181874108	10.058796773136	1.88127583828837
TGGT1_318350:E011	TGGT1_318350	E011	0.0094035058837016	8.65801394533735e-05	0.0039540181874108	106.291232268999	0.382099716326052
TGGT1_269200:E016	TGGT1_269200	E016	0.0727445604895381	8.69836211643423e-05	0.00397004592683775	13.6607007990387	1.15055978441257
TGGT1_298840:E006	TGGT1_298840	E006	0.0150740044448618	8.74666736510826e-05	0.00398968384302723	66.1410100162341	-0.429396060081009
TGGT1_270010:E004	TGGT1_270010	E004	0.0150131912735782	8.79813386907888e-05	0.00401073916823112	66.4100399844946	0.489158092147333
TGGT1_211700:E011	TGGT1_211700	E011	0.0428602665619483	8.838945150362e-05	0.00402448886960639	23.1994754378082	0.867553028101331
TGGT1_226660:E016	TGGT1_226660	E016	0.0355136282341919	8.83537089096507e-05	0.00402448886960639	28.0071383099869	0.757948440951111
TGGT1_208200:E008	TGGT1_208200	E008	0.126797343843942	8.9122027006971e-05	0.00405540099051227	7.83438211219482	1.78040059548689
TGGT1_313350:E008	TGGT1_313350	E008	0.0434608630919954	8.92089341916796e-05	0.0040569131552801	22.8784160436855	0.863780431213825
TGGT1_250220:E005	TGGT1_250220	E005	0.00133648006537329	9.06866919286934e-05	0.00412163652997866	779.223742989878	-0.118488138453894
TGGT1_237010:E012	TGGT1_237010	E012	0.0953187770701308	9.11179733536442e-05	0.00413874919592256	10.4233405003531	1.32881403349011
TGGT1_299110:E013	TGGT1_299110	E013	0.0647143638795551	9.12359976033654e-05	0.00414162112363818	15.3574458677979	1.09635195295042
TGGT1_205100:E006	TGGT1_205100	E006	0.0815393500278255	9.15775854676507e-05	0.00415463209172628	12.1861389273667	1.20874962127878
TGGT1_261440:E002	TGGT1_261440	E002	0.00336358402670302	9.1773773118595e-05	0.0041610349849128	300.756731427753	0.220294886009957
TGGT1_298840:E007	TGGT1_298840	E007	0.0135929151090489	9.26051922795096e-05	0.00419621441419058	82.4375759772425	-0.390116453177541
TGGT1_212260:E013	TGGT1_212260	E013	0.0295407085476282	9.28478544859514e-05	0.00420468935755373	33.681944152457	0.700444397790168
TGGT1_261850:E001	TGGT1_261850	E001	0.0466145919452159	9.33281003925714e-05	0.00422390687656966	21.3284970429864	0.894432658105878
TGGT1_253170:E003	TGGT1_253170	E003	0.105022763130788	9.34432101083861e-05	0.00422462054867698	9.45966404860104	1.57179152942897
TGGT1_304640:E003	TGGT1_304640	E003	0.027184466959628	9.34556581909437e-05	0.00422462054867698	36.608064476912	0.655931028902026
TGGT1_216760:E016	TGGT1_216760	E016	0.0468754092803898	9.3977315438486e-05	0.00424566255557182	21.2096662526609	0.908037094604562
TGGT1_280400:E012	TGGT1_280400	E012	0.0630953294624488	9.4058372992733e-05	0.00424678610963963	19.4816268075218	1.03833651905736
TGGT1_263630:E004	TGGT1_263630	E004	0.000931272802696833	9.41186753244806e-05	0.00424697177216412	1142.56996125212	-0.0956185268467149
TGGT1_247780:E005	TGGT1_247780	E005	0.0061040152055984	9.49228843537365e-05	0.00428070491958479	164.338567866864	-0.290733447972856
TGGT1_244840:E014	TGGT1_244840	E014	0.0204733299854041	9.57309562671203e-05	0.00431457193594603	48.644763874959	0.577304825724199
TGGT1_221460:E018	TGGT1_221460	E018	0.0274016797632219	9.58575455527242e-05	0.00431770262691657	36.3172117555628	-0.677112083395251
TGGT1_234610:E019	TGGT1_234610	E019	0.0184426922736485	9.59881144754541e-05	0.00432100873632149	54.0189558601248	0.54048411400822
TGGT1_305040:E014	TGGT1_305040	E014	0.0403496406574286	9.60820374764499e-05	0.00432266223603871	24.6452191055219	0.83976947926517
TGGT1_244165:E030	TGGT1_244165	E030	0.015932674575677	9.70242424718782e-05	0.00436184567365725	62.5624416938605	0.490711367319709
TGGT1_278640:E017	TGGT1_278640	E017	0.187381877742591	9.70684081274841e-05	0.00436184567365725	5.30051816351581	2.4534242014015
TGGT1_297500:E019	TGGT1_297500	E019	0.107902575876435	9.71656297039398e-05	0.00436362009761329	9.20704920204254	1.52104506835996
TGGT1_217020:E032	TGGT1_217020	E032	0.00234301480501742	9.78382700048576e-05	0.0043889269924025	435.337205010658	-0.180949342673371
TGGT1_225220:E028	TGGT1_225220	E028	0.0643030892178689	9.78452803868409e-05	0.0043889269924025	15.4557654239206	1.08513098525089
TGGT1_304890:E007	TGGT1_304890	E007	0.0066609782725509	9.80650588240369e-05	0.00439617632030745	150.467583385224	0.297707838018453
TGGT1_205580:E001	TGGT1_205580	E001	0.00149169773899391	9.84290234322853e-05	0.00440987697039655	694.609667253227	-0.0909890494101019
TGGT1_280700:E033	TGGT1_280700	E033	0.00336495183581559	9.90315598277047e-05	0.0044342436936597	300.632172532154	-0.211834235671093
TGGT1_294280:E008	TGGT1_294280	E008	0.141104674184254	9.91994292427548e-05	0.00443913040913315	7.03966298220113	1.85363413440478
TGGT1_248640:E022	TGGT1_248640	E022	0.0361227685791623	9.97313056569687e-05	0.00445765318992608	27.5340366930274	0.778875548978762
TGGT1_295910:E001	TGGT1_295910	E001	0.0023509082389834	9.96824114843097e-05	0.00445765318992608	433.83573889698	-0.171145028944013
TGGT1_314970:E007	TGGT1_314970	E007	0.0171617401679545	9.9825877796175e-05	0.0044592432007036	58.0656142771241	0.527766303647756
TGGT1_224830:E002	TGGT1_224830	E002	0.00971750486963997	0.000100992731225964	0.00450870207414107	201.473718884064	-0.307713947355129
TGGT1_207460B:E020	TGGT1_207460B	E020	0.0124428595763389	0.000101350941911336	0.00452202295840767	142.56970391179	0.381328145772289
TGGT1_257800:E019	TGGT1_257800	E019	0.117501598996337	0.000101591093866076	0.00453006375019809	8.45450163078684	1.58825688578227
TGGT1_248445:E007	TGGT1_248445	E007	0.0127655230753911	0.000101837680006536	0.00453303623689871	78.1603995981296	0.442351112990881
TGGT1_267330:E008	TGGT1_267330	E008	0.0461493992549142	0.00010173415101596	0.00453303623689871	21.5437819202176	0.897503400207183
TGGT1_305520:E010	TGGT1_305520	E010	0.0298012821156316	0.000101829200551974	0.00453303623689871	92.7632178667649	-0.617152747134659
TGGT1_221230:E011	TGGT1_221230	E011	0.0435309641442795	0.000102950336187452	0.00457986598570925	22.8415204973674	0.88514410471684
TGGT1_215590:E004	TGGT1_215590	E004	0.0198619318506131	0.000103095846496783	0.00458311933431855	93.255714258916	0.517430381372094
TGGT1_278800:E019	TGGT1_278800	E019	0.0945876489837929	0.00010314474329438	0.00458311933431855	10.5039622070967	1.36328656982938
TGGT1_254450:E008	TGGT1_254450	E008	0.061238159616831	0.000103740209046585	0.00460686984733196	16.2301037622179	1.04706097434699
TGGT1_297925:E002	TGGT1_297925	E002	0.00916265176833777	0.000103976858120273	0.00461466758100202	121.243312219741	0.318448066154248
TGGT1_237530:E013	TGGT1_237530	E013	0.058350427662826	0.000104249471826512	0.00462405139647384	17.0341812117335	1.04304656883011
TGGT1_203880:E014	TGGT1_203880	E014	0.024339868348347	0.00010471335499051	0.00464190310668196	40.8974208078181	-0.630106476522239
TGGT1_261022:E070	TGGT1_261022	E070	0.00263160333107242	0.000104945966265295	0.00464948770355423	386.439867344272	-0.186424813825032
TGGT1_268280:E030	TGGT1_268280	E030	0.00978272889094394	0.000105257954207919	0.0046605780286719	102.144504083937	0.382634658210088
TGGT1_278830:E031	TGGT1_278830	E031	0.0398762172080398	0.000105679138502339	0.00467648749782422	24.9382728437038	0.826256709268532
TGGT1_200310:E004	TGGT1_200310	E004	0.00626470899078777	0.000105845863001389	0.00468112464445346	160.080854536534	0.296729040516146
TGGT1_213400:E008	TGGT1_213400	E008	0.00885707681664745	0.000106515774642139	0.00470541498767362	112.895203467313	0.356518413793288
TGGT1_266640:E033	TGGT1_266640	E033	0.00257741852814966	0.00010651960842409	0.00470541498767362	394.765104678712	-0.198459333098828
TGGT1_318760:E008	TGGT1_318760	E008	0.0341685153304818	0.000106739291610361	0.00471236515098966	29.1117092801573	0.753915812580179
TGGT1_236640:E013	TGGT1_236640	E013	0.0293901598256335	0.000108453011938144	0.00478033999166562	33.8548435500987	0.679493085100929
TGGT1_242070:E004	TGGT1_242070	E004	0.011713637415206	0.000108445821936519	0.00478033999166562	118.256070366804	-0.366691885874099
TGGT1_312840:E006	TGGT1_312840	E006	0.0381183632118905	0.000108468723845711	0.00478033999166562	26.0902000243987	0.781476587888501
TGGT1_213072:E007	TGGT1_213072	E007	0.00973525031068681	0.000109177167852814	0.00480875798406258	102.645867501483	-0.393403424321239
TGGT1_248445:E005	TGGT1_248445	E005	0.00259305423403666	0.000110286159146978	0.00485477488680658	392.326159937285	-0.189671168501365
TGGT1_219430:E004	TGGT1_219430	E004	0.0139789793102921	0.000110904732252424	0.00487916267351728	71.3452642704323	0.443320184660281
TGGT1_212260:E003	TGGT1_212260	E003	0.00894194321351066	0.000110998279661791	0.00488043744816609	111.816220700296	0.367090758565555
TGGT1_283510:E015	TGGT1_283510	E015	0.023422420512385	0.000112211828681221	0.00493092699731632	42.5036286953166	0.611093864483893
TGGT1_318290:E009	TGGT1_318290	E009	0.0299239172978396	0.000112962019357884	0.0049610083364948	33.2497102006322	0.690118249584289
TGGT1_210980:E013	TGGT1_210980	E013	0.020153120158307	0.00011348841475752	0.00498123191881702	49.4200688056521	0.557671331485244
TGGT1_272640:E005	TGGT1_272640	E005	0.0173462565017431	0.000113757808420481	0.00499015825655065	61.4372616335302	0.493923157873095
TGGT1_297780:E017	TGGT1_297780	E017	0.083614166284029	0.000114038246243606	0.00499955842667297	11.8835246033485	1.25638618403986
TGGT1_214300:E022	TGGT1_214300	E022	0.0248953579408627	0.000114153457056896	0.00500170816885468	39.9825891078616	0.635342572106821
TGGT1_289620:E017	TGGT1_289620	E017	0.0294315823262865	0.000115896065137283	0.00507511958007307	35.8360758842321	-0.691081450061646
TGGT1_229740:E010	TGGT1_229740	E010	0.0266660912714292	0.000116118288578811	0.00508190647791759	37.3213730607634	0.64854272362654
TGGT1_219070:E003	TGGT1_219070	E003	0.035502548567871	0.000116775847085951	0.00510527961146039	28.015894160733	0.786462354694047
TGGT1_227860:E008	TGGT1_227860	E008	0.0432465323835313	0.000116787442092231	0.00510527961146039	22.991965457273	0.83360760234459
TGGT1_226072:E007	TGGT1_226072	E007	0.0181723150713839	0.000117281651959824	0.00512344913241373	92.2022202244749	0.480895001884029
TGGT1_318410:E005	TGGT1_318410	E005	0.0268887708544963	0.000117338657990106	0.00512344913241373	37.011578304446	0.656780235982209
TGGT1_209830:E011	TGGT1_209830	E011	0.0619644030742613	0.000118052566429995	0.00515164496299761	16.0396901688765	1.03663484606272
TGGT1_270140:E006	TGGT1_270140	E006	0.141672594136906	0.000118775094686683	0.00518018419308073	7.01143082307838	1.83325597967145
TGGT1_220500:E016	TGGT1_220500	E016	0.00562807752665567	0.00011936861365023	0.00520306721851883	178.391332776185	-0.279263790652523
TGGT1_223855:E013	TGGT1_223855	E013	0.0254400233549502	0.000120577481960425	0.005252730398578	39.1244698996823	0.616255665454949
TGGT1_313400:E006	TGGT1_313400	E006	0.013985734167844	0.00012113195403066	0.00527384524743394	71.3106516726477	0.452207883210985
TGGT1_239020:E062	TGGT1_239020	E062	0.0567450664301852	0.000121308656766611	0.00527849792500517	17.5166206503107	0.975517576089386
TGGT1_294870:E006	TGGT1_294870	E006	0.00184813153924474	0.00012149655446886	0.00528363209428386	1058.2760131509	-0.109062707742282
TGGT1_226960:E016	TGGT1_226960	E016	0.0358130841628132	0.000121618022286008	0.00528587312272633	27.772544918347	0.774484789133411
TGGT1_246990:E004	TGGT1_246990	E004	0.0318619262039196	0.000122556215400045	0.00532358843239436	31.2233284087199	0.696955899319401
TGGT1_304955:E028	TGGT1_304955	E028	0.0019050524880115	0.000122730612457313	0.00532810175229674	538.801283919865	-0.129665061056559
TGGT1_202080:E010	TGGT1_202080	E010	0.0171227655585829	0.000123579431073413	0.00536187173328974	58.1982648950332	0.506809563143014
TGGT1_216910:E005	TGGT1_216910	E005	0.0242623996792576	0.000124307471293883	0.0053903656312876	41.0283403291629	0.601173508773217
TGGT1_285680:E005	TGGT1_285680	E005	0.0648558299255029	0.000124485316313212	0.00539189064618063	18.1141379022251	0.98833134149894
TGGT1_312490:E007	TGGT1_312490	E007	0.0263174582492912	0.000124415248858018	0.00539189064618063	37.8169499867544	0.642374208088353
TGGT1_219650:E030	TGGT1_219650	E030	0.0258106263657779	0.000124640305411828	0.00539551177756974	144.418880209379	-0.552301386155911
TGGT1_321540:E003	TGGT1_321540	E003	0.0203926007988755	0.000125554516138575	0.00543197563754193	48.8379261600257	0.563820877560314
TGGT1_262150:E013	TGGT1_262150	E013	0.0428898805346723	0.00012572636833426	0.00543629883949659	23.1834337137417	0.85406903852306
TGGT1_281545:E025	TGGT1_281545	E025	0.029542783128495	0.000127133343184564	0.00548771693008321	33.6795739112035	-0.663277584446554
TGGT1_297780:E003	TGGT1_297780	E003	0.0340187672161928	0.000127081746127655	0.00548771693008321	29.2400919034677	0.754841077622619
TGGT1_310045:E012	TGGT1_310045	E012	0.00684449117893443	0.000127027171129008	0.00548771693008321	146.396238237416	-0.30538607486599
TGGT1_280370:E004	TGGT1_280370	E004	0.0154082774060142	0.000128057588377347	0.00552445698900495	173.981077737354	-0.426782559726106
TGGT1_293540:E001	TGGT1_293540	E001	0.00227993971476764	0.000128375393892719	0.00553500799840244	447.719118043285	-0.158913780612452
TGGT1_319590:E009	TGGT1_319590	E009	0.0641387219185581	0.000128809613957371	0.00555056342196465	15.4954121667991	1.08513313132758
TGGT1_219500:E015	TGGT1_219500	E015	0.0164756945094707	0.000129488478432794	0.005576637137839	60.4926321324942	0.502144714964416
TGGT1_293720:E004	TGGT1_293720	E004	0.00327358372170598	0.000129683882375711	0.00558187198047894	309.185754806392	-0.206588800173944
TGGT1_289050:E002	TGGT1_289050	E002	0.00167930855523671	0.000129804317310352	0.00558387587418952	614.019951531777	0.156066462208091
TGGT1_282055:E021	TGGT1_282055	E021	0.00330735418874146	0.000130375261845603	0.00560524632583296	305.968160951346	0.218535544253899
TGGT1_255670:E009	TGGT1_255670	E009	0.0214035271266614	0.000131342889966777	0.00564363746985158	46.5244937190033	0.567350586882561
TGGT1_272320:E046	TGGT1_272320	E046	0.0155513731538665	0.000131805132164097	0.0056602815336516	64.1025667225294	0.488283260724931
TGGT1_266910:E003	TGGT1_266910	E003	0.00977710529195562	0.000132124932492166	0.00567079309916121	102.203632211107	-0.352203240403398
TGGT1_230340:E003	TGGT1_230340	E003	0.00175299669578515	0.000132960060222108	0.00570339799756376	587.258607794474	-0.156701153975315
TGGT1_261430:E004	TGGT1_261430	E004	0.00689842932454476	0.00013485495950514	0.00578139963092312	145.241152926825	0.302522626140197
TGGT1_204055:E009	TGGT1_204055	E009	0.00250019575415885	0.000135269746353757	0.0057958945401982	407.269553203661	0.103086426276227
TGGT1_239700:E015	TGGT1_239700	E015	0.0320835737516878	0.000136537693408348	0.0058435967968232	31.0072043159362	0.711892606531067
TGGT1_263820:E002	TGGT1_263820	E002	0.0557842469315134	0.000136479144956986	0.0058435967968232	17.8186614798588	0.962584625020839
TGGT1_306460:E007	TGGT1_306460	E007	0.0289375921642554	0.000136884968999168	0.0058551441578354	34.3854561561825	0.670664717382563
TGGT1_236210:E004	TGGT1_236210	E004	0.013483405565249	0.000136992598750426	0.00585643359658071	73.9796801445397	0.456924691060936
TGGT1_202190:E012	TGGT1_202190	E012	0.0401515512563768	0.000137462437789763	0.00587319727135434	24.7669962272109	0.809906123040982
TGGT1_256830:E014	TGGT1_256830	E014	0.0218134845726807	0.000138001768389768	0.00589290941154545	53.5133404573258	0.568424001330121
TGGT1_235340:E004	TGGT1_235340	E004	0.0262229847285525	0.000139003974748654	0.00593235370945949	290.350179001711	0.531681257889312
TGGT1_226710:E013	TGGT1_226710	E013	0.0242080104353834	0.000139263917144758	0.00593797574967003	176.971828917721	-0.517688225495398
TGGT1_300340:E012	TGGT1_300340	E012	0.0329661101985295	0.000139292834327816	0.00593797574967003	30.1755387172804	0.700929845418975
TGGT1_260470:E029	TGGT1_260470	E029	0.0214592528033379	0.000139379542665335	0.00593832276985982	46.4033266597981	0.578216058065785
TGGT1_245720:E013	TGGT1_245720	E013	0.0387253734866126	0.000140367849473732	0.00597706073178794	25.6805841363117	0.790858919497768
TGGT1_225300:E020	TGGT1_225300	E020	0.00416923613558389	0.00014121737976958	0.00600984909782906	241.758051365677	-0.240825930073376
TGGT1_209580:E009	TGGT1_209580	E009	0.0203198818098703	0.000141392430097548	0.0060139125782965	49.013240283873	0.542096030871099
TGGT1_280700:E024	TGGT1_280700	E024	0.0226975523709455	0.000141657935385792	0.00602181668859895	43.8647574160865	0.588788999476596
TGGT1_244840:E004	TGGT1_244840	E004	0.00424905724258172	0.000141878063444281	0.00602778403105434	237.148928302982	-0.225792596384026
TGGT1_310100:E001	TGGT1_310100	E001	0.00824033795159437	0.000142840021274247	0.00606524409435399	121.40906045137	-0.334035080248342
TGGT1_261450:E008	TGGT1_261450	E008	0.0613598197576954	0.000143707575299018	0.00609523342101591	16.1978911065085	1.01325876332357
TGGT1_315670:E012	TGGT1_315670	E012	0.07922759278366	0.000143644031017435	0.00609523342101591	12.5419941892282	1.21152935764653
TGGT1_203540:E003	TGGT1_203540	E003	0.00948319517425809	0.000144323175016702	0.00611448106172219	223.070958878555	0.332786220098594
TGGT1_248270:E002	TGGT1_248270	E002	0.0129946948532602	0.000144265475284545	0.00611448106172219	76.7753411380821	0.433964501190268
TGGT1_243240:E016	TGGT1_243240	E016	0.104199541313873	0.000145677569462235	0.00616495075873161	9.5344442122245	1.49078419360425
TGGT1_284190:E016	TGGT1_284190	E016	0.0135061810445507	0.000145631649231686	0.00616495075873161	73.854350299965	-0.452989668895538
TGGT1_289570:E018	TGGT1_289570	E018	0.0370174434928327	0.000146650166747254	0.00620263732685558	26.8674449061194	0.783760611546691
TGGT1_309420:E018	TGGT1_309420	E018	0.0779296631243092	0.000148596982351726	0.00628146371370704	12.7510499519332	1.16383191257036
TGGT1_212850:E006	TGGT1_212850	E006	0.0355728110190705	0.000148800397245723	0.0062865464642964	27.9604608834969	0.735082526525248
TGGT1_300290:E004	TGGT1_300290	E004	0.0102247183968539	0.000150209859419322	0.00634254837688893	97.701989969898	-0.358150137906137
TGGT1_221260:E015	TGGT1_221260	E015	0.0134337496474096	0.000151433515269006	0.00639064653883974	74.2544089216272	0.435126885326476
TGGT1_277070:E014	TGGT1_277070	E014	0.110810616064123	0.000152013130792543	0.00641152703770199	8.96528965245508	1.49668799482434
TGGT1_242720:E007	TGGT1_242720	E007	0.0510479854837919	0.000152601922149756	0.00643277104290178	19.4739064174586	-0.900564203307892
TGGT1_316235:E006	TGGT1_316235	E006	0.0179082357889009	0.000152834351937316	0.00643897769683737	55.6367326420559	0.487284848144017
TGGT1_258828:E001	TGGT1_258828	E001	0.0414646906392851	0.000154014737064549	0.00648509295644165	24.030707543553	0.733477982653129
TGGT1_270000:E039	TGGT1_270000	E039	0.0674034426724124	0.000155127389361093	0.00652830642688761	14.744189767098	1.06933468614023
TGGT1_220208:E013	TGGT1_220208	E013	0.105140898758629	0.000157425108835313	0.00662131584640545	9.44902893262809	1.49281487027945
TGGT1_232290:E001	TGGT1_232290	E001	0.00778961826872957	0.000157712827962045	0.00662972801058246	164.616297959829	-0.195611543483717
TGGT1_278830:E013	TGGT1_278830	E013	0.00583664482003224	0.000157813332176331	0.00663026529880568	171.947928971104	0.293775816803472
TGGT1_240710:E008	TGGT1_240710	E008	0.00325326165699485	0.000158990572451523	0.00667601413723945	311.154829984802	0.204969964542957
TGGT1_301120:E009	TGGT1_301120	E009	0.0461319505625311	0.000159397752001635	0.00668939527583984	21.5519415353587	0.849699861747754
TGGT1_234270:E017	TGGT1_234270	E017	0.0487965146974619	0.000160882662647063	0.00674796526536645	20.373580476838	0.891752148723417
TGGT1_313930:E022	TGGT1_313930	E022	0.0185766561709406	0.000161899491277374	0.00678684822502855	54.7299070113278	0.53361627094681
TGGT1_294700:E009	TGGT1_294700	E009	0.0293170850762229	0.000164834441063391	0.00690605139936432	33.9394085905006	0.667035543687758
TGGT1_310930:E007	TGGT1_310930	E007	0.020235659239969	0.00016511887958249	0.00691413582083311	49.2178673794576	-0.551562285830699
TGGT1_270370:E005	TGGT1_270370	E005	0.00426023231473613	0.00016584530800182	0.00694070878703963	236.517631676663	-0.207254404181991
TGGT1_227840:E011	TGGT1_227840	E011	0.0279892677055672	0.000166747532798652	0.00697460543662853	35.5530924020297	0.639112042176995
TGGT1_280700:E019	TGGT1_280700	E019	0.035362955361336	0.000167272705669523	0.00699270223446566	28.1266803677736	0.74707388243261
TGGT1_263740:E046	TGGT1_263740	E046	0.0171429497448407	0.000167445717098104	0.00699606533427799	58.1294921664537	-0.490923726704273
TGGT1_262150:E011	TGGT1_262150	E011	0.0659400568109289	0.000167960750722479	0.00701370688458917	15.0717120090716	1.11037669726175
TGGT1_293180:E009	TGGT1_293180	E009	0.00533306529447574	0.000169356455526847	0.00706808372260086	404.727537631618	0.244054980650642
TGGT1_219630:E015	TGGT1_219630	E015	0.00801318687008741	0.000169641322521331	0.00707606536358017	124.877618437606	0.323292456904522
TGGT1_206550:E032	TGGT1_206550	E032	0.0362729382343536	0.0001698312165873	0.00707871029778917	27.4198499753666	0.77219707630128
TGGT1_318410:E007	TGGT1_318410	E007	0.0295319234116972	0.000169892044140001	0.00707871029778917	33.6919850071071	0.673504139249441
TGGT1_250220:E003	TGGT1_250220	E003	0.000738242954912615	0.000170052391218782	0.00708148751134877	1468.84290814596	0.114384514198364
TGGT1_278060:E016	TGGT1_278060	E016	0.0379598965146271	0.000170252479008025	0.00708591567642323	26.1992946759143	0.771128862450235
TGGT1_243690:E004	TGGT1_243690	E004	0.013536556279554	0.000170487079685344	0.00708787373860157	73.6878595480796	0.427553697711854
TGGT1_294270:E002	TGGT1_294270	E002	0.0500513412027998	0.000170466472534508	0.00708787373860157	19.8621624677403	0.90022488546093
TGGT1_216530:E010	TGGT1_216530	E010	0.0318159918875117	0.000170828256221786	0.00709815352487906	31.2684954751369	0.678019761258909
TGGT1_285480:E010	TGGT1_285480	E010	0.117728092914373	0.000171192145858025	0.00710936525727542	8.43822763353861	-1.61280216772193
TGGT1_220320:E005	TGGT1_220320	E005	0.03966304383262	0.000171375469391937	0.00711307014145051	25.0725171004636	0.740583994241859
TGGT1_236650:E015	TGGT1_236650	E015	0.000420023274907485	0.000172105735251997	0.00713945975950409	2775.38875778736	-0.0596966010257115
TGGT1_203390:E006	TGGT1_203390	E006	0.00108019266805509	0.000172520216357079	0.00714880646529645	975.41367248391	-0.0804573454285711
TGGT1_315080:E009	TGGT1_315080	E009	0.010773825323995	0.000172505232982194	0.00714880646529645	92.6934863348231	0.392003390663963
TGGT1_262390:E016	TGGT1_262390	E016	0.0442871196120835	0.000174517422273233	0.00722757799780738	22.4509766591735	0.823639579009524
TGGT1_288350:E008	TGGT1_288350	E008	0.0237524053535503	0.000174612439787202	0.00722757799780738	41.9115866564734	0.606626601796637
TGGT1_235750:E006	TGGT1_235750	E006	0.0420573050941134	0.000175632223585074	0.0072658099195441	23.6430585175705	0.825309388702102
TGGT1_214280:E005	TGGT1_214280	E005	0.0370023319569256	0.000177727419869713	0.00734846490623232	26.8784359112836	0.745379777789164
TGGT1_211650:E007	TGGT1_211650	E007	0.0196569798600105	0.000179226697256084	0.00740235641093406	97.4761640261678	-0.48673675023456
TGGT1_213740:E012	TGGT1_213740	E012	0.0478505023515083	0.000179210210848792	0.00740235641093406	20.7768944240152	0.87447360079979
TGGT1_285810:E008	TGGT1_285810	E008	0.149123625175635	0.000179724786372437	0.00741887427831871	6.66095507215825	1.95218291071767
TGGT1_256780:E008	TGGT1_256780	E008	0.0208183686460838	0.000180076959945037	0.00742798504622109	47.8361182626812	0.555118314300458
TGGT1_262520:E006	TGGT1_262520	E006	0.0356614684516851	0.000180142052204536	0.00742798504622109	38.5103829871712	0.686278021454089
TGGT1_233680:E012	TGGT1_233680	E012	0.00522521839866561	0.000180986304441892	0.00745872784205404	192.311023371523	-0.222468604814383
TGGT1_271145:E045	TGGT1_271145	E045	0.17777881906242	0.000181228684346498	0.00746464655055968	5.58693599357791	14.5677076659327
TGGT1_297230:E015	TGGT1_297230	E015	0.0193357133828816	0.000182732282173193	0.0075224789494631	51.5160258407252	0.538448202821405
TGGT1_233680:E007	TGGT1_233680	E007	0.0595169371548366	0.000183941846255474	0.00756815058447537	16.6999679927579	0.973328854329267
TGGT1_304955:E020	TGGT1_304955	E020	0.0098599493415164	0.000186375066271967	0.00765992401248928	719.49339825816	0.333955266199119
TGGT1_320440B:E007	TGGT1_320440B	E007	0.0832557962726492	0.00018634909825348	0.00765992401248928	11.9347148736302	1.31477629536493
TGGT1_277685:E003	TGGT1_277685	E003	0.00322108874873934	0.000186702550396572	0.00766921313264874	314.323980215942	0.167488428965819
TGGT1_221170:E007	TGGT1_221170	E007	0.0151544425574338	0.000187828380669497	0.00771126815196192	65.7884921995537	-0.468727006400872
TGGT1_248630:E009	TGGT1_248630	E009	0.0108989138962442	0.000188353940968664	0.00772864688723863	91.6235147492979	0.393420846194968
TGGT1_313930:E007	TGGT1_313930	E007	0.00854536850859382	0.000189007247235215	0.00775124566496582	149.656536303595	0.331118160611453
TGGT1_237230:E004	TGGT1_237230	E004	0.0198090017209419	0.000189144174981742	0.00775265457346529	121.191918147659	-0.484058737594962
TGGT1_315150:E013	TGGT1_315150	E013	0.00368097089087801	0.00018933632070235	0.00775632400613823	274.378103662282	-0.203196412884808
TGGT1_312618:E013	TGGT1_312618	E013	0.0864047425392929	0.000189524936245588	0.00775984492487216	11.4994507811112	1.25895279189775
TGGT1_217020:E021	TGGT1_217020	E021	0.00326094335706341	0.00019187755075039	0.00785191610222845	310.407582161746	-0.210314950119796
TGGT1_285800:E022	TGGT1_285800	E022	0.0344450853743845	0.000192215226331428	0.00786147794187339	28.8775391646019	0.72579815584966
TGGT1_271060:E019	TGGT1_271060	E019	0.0522759898531001	0.000192580197849759	0.00787214522113602	19.0159033397889	0.91880333743036
TGGT1_203170:E020	TGGT1_203170	E020	0.0162712753234215	0.000193131980676603	0.00789043316945892	61.2555326359844	0.497302164363623
TGGT1_308810B:E013	TGGT1_308810B	E013	0.0242885488984292	0.000194080740544425	0.00792491114631484	40.9840553903664	0.610623710339583
TGGT1_278630:E008	TGGT1_278630	E008	0.0433085961052854	0.000194761697878684	0.00794842259668827	22.9589691952722	0.971202584403474
TGGT1_265520:E011	TGGT1_265520	E011	0.0264397118875936	0.000195228568308449	0.00796317628164555	37.6416767136637	0.62776562063627
TGGT1_258880:E026	TGGT1_258880	E026	0.139131831704105	0.000195939749577665	0.00798356773723939	7.13952772967965	-1.86569109614631
TGGT1_272320:E005	TGGT1_272320	E005	0.0261174532960358	0.00019590253029619	0.00798356773723939	59.6872251355154	-0.561769836254858
TGGT1_255350:E005	TGGT1_255350	E005	0.0408367813513267	0.000197325087452998	0.00803568144389682	24.3507780401016	0.770881233483048
TGGT1_264780:E006	TGGT1_264780	E006	0.0623520871602176	0.000199221078334102	0.00810852317859348	15.9398611215334	0.986488860394759
TGGT1_295590:E010	TGGT1_295590	E010	0.149921868683009	0.000199831879940258	0.00812900600088512	6.62547476687217	1.79031792524523
TGGT1_226940:E013	TGGT1_226940	E013	0.178039048321921	0.000201553591282044	0.00819463342457206	5.57876703878611	2.01682030401361
TGGT1_239910:E003	TGGT1_239910	E003	0.00725161111308859	0.000202474083758166	0.00822763236484394	138.106067255303	-0.183106116244176
TGGT1_257960:E009	TGGT1_257960	E009	0.0237670474583597	0.000203414822849676	0.00825817002048971	41.8856984585699	0.588481089786201
TGGT1_268810:E007	TGGT1_268810	E007	0.00776023183918182	0.000203444108096529	0.00825817002048971	128.981099643638	0.317829406866489
TGGT1_233680:E006	TGGT1_233680	E006	0.0698535960072564	0.000204233286720411	0.00828575430858943	14.2265677314604	1.06364037100041
TGGT1_212260:E012	TGGT1_212260	E012	0.00310830661570721	0.000204725391107832	0.0083012631495237	325.962115230548	-0.182278597505233
TGGT1_268980:E012	TGGT1_268980	E012	0.00370462088676402	0.000205779114034459	0.0083395158160603	272.596548324941	-0.219497462470338
TGGT1_295910:E003	TGGT1_295910	E003	0.00277653304639817	0.000206361103238916	0.00835861999196342	365.805640271747	-0.180975411293213
TGGT1_249350:E012	TGGT1_249350	E012	0.0205353962360225	0.000207190261243904	0.00838770986895382	48.4972925612809	0.533171033627053
TGGT1_201200:E004	TGGT1_201200	E004	0.0185375250427419	0.000207374418512835	0.00839067093149737	53.7416785775865	-0.489181884355176
TGGT1_267510:E005	TGGT1_267510	E005	0.021911021260183	0.000207614679976277	0.00839589766825414	45.4438409811373	0.553014129853398
TGGT1_244040:E027	TGGT1_244040	E027	0.0359115737880747	0.000209808350471702	0.00848007205633806	27.6962447500713	0.745934716598733
TGGT1_279390:E005	TGGT1_279390	E005	0.00550168262294215	0.000210201261648195	0.00849141194970275	182.536592015687	0.280424996696388
TGGT1_270140:E009	TGGT1_270140	E009	0.0661772777466795	0.000210475949196716	0.00849796644881742	15.0176346367735	1.04249395805409
TGGT1_203480:E008	TGGT1_203480	E008	0.0204425514405154	0.000210962537833897	0.00851306488764635	48.7182277968961	0.52371478554691
TGGT1_233838:E008	TGGT1_233838	E008	0.213954284902022	0.000212403716009669	0.00856664763257352	4.64201985512911	12.7623201651927
TGGT1_248100:E011	TGGT1_248100	E011	0.0168736801916454	0.000213560571651041	0.00860767465219108	59.0605566470686	0.47960347719278
TGGT1_272640:E008	TGGT1_272640	E008	0.0378560767821196	0.000213648721223446	0.00860767465219108	26.2712642483325	0.712304276686443
TGGT1_315210:E015	TGGT1_315210	E015	0.0282855939551206	0.000214159847600473	0.00862367053880604	87.1215740112216	-0.58976626514691
TGGT1_232150:E018	TGGT1_232150	E018	0.00660660920108104	0.000214569585908591	0.00863556892552882	151.717639136609	0.313151478240801
TGGT1_263740:E043	TGGT1_263740	E043	0.0217113033785248	0.000215092771035813	0.00865201799916382	45.8630721555557	-0.541871726854154
TGGT1_297780:E016	TGGT1_297780	E016	0.0709463205098763	0.000216126438279278	0.00868435324722191	14.0072557691767	1.09277970663159
TGGT1_313775:E002	TGGT1_313775	E002	0.120131829225035	0.000216057667435448	0.00868435324722191	8.26929826367552	1.39816616413251
TGGT1_210730:E014	TGGT1_210730	E014	0.0153308080827443	0.000216840228273532	0.00870840495928274	65.0285749364454	0.457591688571448
TGGT1_214090:E004	TGGT1_214090	E004	0.0287275224863018	0.000217120917596185	0.00871504683683209	34.6374456660094	-0.658099756345459
TGGT1_240710:E014	TGGT1_240710	E014	0.0369842012415346	0.000218654093591683	0.00877192871647909	47.0694539969089	0.688502451787244
TGGT1_214170:E017	TGGT1_214170	E017	0.100742771316308	0.000219340332812478	0.00879479099980514	9.86180037208604	1.35541931218188
TGGT1_306350:E009	TGGT1_306350	E009	0.0224670594443481	0.000219870225874226	0.00881136342101046	44.3160233619204	0.549688631458673
TGGT1_214400:E002	TGGT1_214400	E002	0.00820430426782735	0.000221212560583195	0.00885107874748492	121.946373136706	-0.312071920003751
TGGT1_225010:E004	TGGT1_225010	E004	0.0289125483625771	0.00022099783848815	0.00885107874748492	34.415304834886	-0.653214132049417
TGGT1_315590:E014	TGGT1_315590	E014	0.0618382263113579	0.000221104049451575	0.00885107874748492	16.0724510755982	0.988101074378193
TGGT1_268210:E017	TGGT1_268210	E017	0.003822878894195	0.000222452389336558	0.00889597697927816	264.024328475203	-0.164115328177383
TGGT1_261080:E023	TGGT1_261080	E023	0.207304550722357	0.000223051607065298	0.00891522293242165	4.79096725480109	2.40285854734096
TGGT1_257060:E005	TGGT1_257060	E005	0.0303564077441046	0.00022419654329243	0.0089562490143385	32.775024820035	0.649539430344067
TGGT1_217182:E002	TGGT1_217182	E002	0.0011699787810272	0.000224578454744765	0.00896676638484881	896.35048627224	-0.116815297159439
TGGT1_276100:E011	TGGT1_276100	E011	0.0740964585696562	0.000224873451356409	0.00897380422408663	13.4112501499556	1.0767747010968
TGGT1_263740:E041	TGGT1_263740	E041	0.0160243753272035	0.000225461887177107	0.00899253844676522	69.32246477906	-0.439695015607624
TGGT1_220500:E011	TGGT1_220500	E011	0.00528728893004581	0.000225896614107503	0.00900512546807663	190.026465430182	0.261570860489483
TGGT1_251390:E013	TGGT1_251390	E013	0.0123613985062381	0.000226633917872304	0.0090297547604768	80.7285937796357	0.392740237174064
TGGT1_217182:E020	TGGT1_217182	E020	0.0408123026764421	0.000226855488166762	0.0090334291710983	24.3654056320474	-0.773119597833196
TGGT1_263330:E007	TGGT1_263330	E007	0.0411646292134561	0.000226965176839931	0.0090334291710983	24.156547061239	0.79099863864241
TGGT1_214280:E004	TGGT1_214280	E004	0.0486941228568807	0.000227233783151566	0.00903344595371701	20.4164759967439	0.862335376253655
TGGT1_222800:E029	TGGT1_222800	E029	0.132361900425207	0.00022731077066498	0.00903344595371701	7.50486596766373	1.62599305136332
TGGT1_308040:E008	TGGT1_308040	E008	0.0618307202722356	0.000227324153951599	0.00903344595371701	16.0744041836252	1.0343700903094
TGGT1_239800:E006	TGGT1_239800	E006	0.00939891388062853	0.000228276655121003	0.00906652976739657	106.343509074775	0.361841322155376
TGGT1_227790:E009	TGGT1_227790	E009	0.0571542325529046	0.000229081795939384	0.00909372914952234	17.3910826929002	0.944162709156639
TGGT1_221360:E009	TGGT1_221360	E009	0.0372522183787094	0.000229306127796815	0.00909593129680879	26.6978345030623	0.742820233523903
TGGT1_231940:E013	TGGT1_231940	E013	0.0263059812745745	0.00022937796104519	0.00909593129680879	37.833488206312	0.608965503214975
TGGT1_228670:E002	TGGT1_228670	E002	0.145683579243967	0.000229827524656478	0.00910897953255684	6.81830836254605	1.69763018441446
TGGT1_229650:E003	TGGT1_229650	E003	0.0232089596658941	0.000232421168962333	0.0092069480044607	42.8956010504193	0.578130068270073
TGGT1_217020:E024	TGGT1_217020	E024	0.0028117730612086	0.000232930569285782	0.00921334744450432	386.269364908471	-0.18203730014228
TGGT1_223480:E058	TGGT1_223480	E058	0.209319811956602	0.000233070311898233	0.00921334744450432	4.74482769530601	2.38015853203075
TGGT1_233110:E004	TGGT1_233110	E004	0.0683925963522981	0.000233023367989077	0.00921334744450432	14.5307520246092	1.05495477321314
TGGT1_268290:E009	TGGT1_268290	E009	0.0262794040547053	0.000232971760273079	0.00921334744450432	37.8718413351621	0.613551363764051
TGGT1_309980:E054	TGGT1_309980	E054	0.00742582661415106	0.000233575680036136	0.00922849819576123	134.838592743518	0.317240874247447
TGGT1_263100:E036	TGGT1_263100	E036	0.0236390543071236	0.000234087793446949	0.00924389947978437	42.1130867050058	0.578878011561395
TGGT1_225010:E007	TGGT1_225010	E007	0.00602896928661268	0.00023464995746594	0.00925159785351625	166.40553123841	0.277333214202297
TGGT1_236650:E013	TGGT1_236650	E013	0.000427957148209821	0.000234539779810665	0.00925159785351625	2715.17369444681	-0.0597495172671242
TGGT1_260610:E014	TGGT1_260610	E014	0.0298252602736124	0.000234572955866514	0.00925159785351625	33.3599248655284	0.63789263355474
TGGT1_209040:E005	TGGT1_209040	E005	0.0129554025027392	0.000236141001998962	0.00930553139368382	77.0093172295738	0.331909375474221
TGGT1_239020:E050	TGGT1_239020	E050	0.0397296254326598	0.000236587159319693	0.00931825465122513	25.0304329107953	0.779311876814703
TGGT1_275480:E024	TGGT1_275480	E024	0.0410687447322652	0.000237769986053697	0.00935996410724506	35.2713055666325	0.739269078505132
TGGT1_226220:E011	TGGT1_226220	E011	0.00207700342161965	0.0002379381575113	0.00936170839199326	492.816239041242	-0.134655667510491
TGGT1_201260:E007	TGGT1_201260	E007	0.00307528518545792	0.000239649192451692	0.00942412344634952	329.534534191131	0.199677190878741
TGGT1_249820:E021	TGGT1_249820	E021	0.125216567613852	0.000239821149695735	0.00942598135013159	14.447265059445	1.40316577119958
TGGT1_207430:E019	TGGT1_207430	E019	0.145974222513174	0.000240593953732146	0.00945144085809931	6.80472691520961	1.68175559967821
TGGT1_293540:E010	TGGT1_293540	E010	0.0265667221339009	0.000241918114274429	0.00949852203277396	37.4612964710745	0.626686303637446
TGGT1_217590:E002	TGGT1_217590	E002	0.0202084797100964	0.000242887037387573	0.00953161373822822	49.2842679003484	0.513015259753361
TGGT1_304955:E031	TGGT1_304955	E031	0.00836579287143321	0.000244851501481429	0.00960371882977133	1147.4822307931	-0.222197565283309
TGGT1_227650:E002	TGGT1_227650	E002	0.0312558869527563	0.000245480722937904	0.00961841576002732	31.8299449975623	0.67747541659162
TGGT1_297500:E005	TGGT1_297500	E005	0.0462259244257372	0.000245478446077751	0.00961841576002732	21.5080689381038	0.833335114285293
TGGT1_278470:E010	TGGT1_278470	E010	0.0303873784569106	0.000246252848917444	0.00964366985848613	32.7415520281838	0.668236552688179
TGGT1_200330:E004	TGGT1_200330	E004	0.0235559388763041	0.000246822290130706	0.009660964439492	42.2620735697478	0.581775348241876
TGGT1_283890:E007	TGGT1_283890	E007	0.123698819227696	0.000247229318244584	0.00967188733517708	8.03072394583173	1.7006409652643
TGGT1_218790:E019	TGGT1_218790	E019	0.0339771035788485	0.00024917239709023	0.00974285986387674	30.1763992997974	0.692153208707718
TGGT1_225010:E005	TGGT1_225010	E005	0.029141395504369	0.000249515163642618	0.00975121773445519	34.1444629398066	-0.650141930283837
TGGT1_269430:E052	TGGT1_269430	E052	0.0189124060160683	0.00025082767386139	0.00978732950221559	52.6728938250817	-0.50536969715047
TGGT1_293190:E011	TGGT1_293190	E011	0.0233130207141269	0.000250799664183634	0.00978732950221559	42.7036174798318	0.584789587620757
TGGT1_300110:E011	TGGT1_300110	E011	0.0344012451982877	0.000250645989636817	0.00978732950221559	28.9144067931116	0.697210327989888
TGGT1_231980:E036	TGGT1_231980	E036	0.04567588617693	0.000251327053447993	0.00980038769001649	21.7674270601578	-0.857710913700761
TGGT1_240840:E016	TGGT1_240840	E016	0.107343947951991	0.000251421657682279	0.00980038769001649	9.25499135877119	1.36826780724399
TGGT1_259710:E012	TGGT1_259710	E012	0.0439228152556046	0.000252171967613036	0.00982456786398374	22.6374538098982	0.811241042112264
TGGT1_233260:E017	TGGT1_233260	E017	0.120596866749296	0.000252629706556667	0.00983733048993614	8.2373942771824	1.39133356091755
TGGT1_281920:E003	TGGT1_281920	E003	0.0186210709884028	0.000253902800619237	0.00988181332461543	53.4997502043984	0.500013015999335
TGGT1_208050:E008	TGGT1_208050	E008	0.285273490965305	0.000254748316102202	0.00990961771880424	3.48124793631516	14.786505819598
TGGT1_265520:E001	TGGT1_265520	E001	0.00129508902804949	0.00025608411738088	0.00995645563779921	805.385738524452	-0.12046162827692
TGGT1_260250:E008	TGGT1_260250	E008	0.0348784630066605	0.000256512756461475	0.00996799339787724	28.5180833995801	-0.718045638968603
TGGT1_202190:E011	TGGT1_202190	E011	0.0257613195826647	0.000257870531683019	0.0100156066421716	38.6353254695798	0.597944422702306
TGGT1_239730:E002	TGGT1_239730	E002	0.0121358828974113	0.00025879975746066	0.0100465348065699	82.2364742660624	0.355570863944558
TGGT1_230690:E007	TGGT1_230690	E007	0.0508766802205699	0.000259759541644251	0.010078616877082	19.5395567510688	0.893017582335254
TGGT1_244040:E025	TGGT1_244040	E025	0.0289337202077017	0.000261495059615825	0.010140748894758	34.3900675980644	0.653754577395689
TGGT1_315150:E002	TGGT1_315150	E002	0.0147822494286099	0.000262097990266634	0.0101589181027347	91.2565602907537	0.418360583568889
TGGT1_258630:E009	TGGT1_258630	E009	0.0447180794340453	0.000263319809024116	0.0102010444929066	22.2343089942651	0.758612751136848
TGGT1_235478:E020	TGGT1_235478	E020	0.024789576858395	0.000265201649580018	0.0102686839541788	40.1536308799967	0.596354584015684
TGGT1_204395:E005	TGGT1_204395	E005	0.0245338795935974	0.000267718940812102	0.0103555440043297	40.5731854492676	0.531670984525037
TGGT1_305950:E009	TGGT1_305950	E009	0.0780073245760277	0.000267671107708699	0.0103555440043297	12.7383452958495	1.11460814105127
TGGT1_202750:E004	TGGT1_202750	E004	0.0152114147184257	0.000267995628114192	0.0103609440225713	65.5410779832035	0.432856956113462
TGGT1_220630:E017	TGGT1_220630	E017	0.0099164628633575	0.00026969675997551	0.0104054213948285	100.758272131351	-0.359084672688489
TGGT1_280370:E005	TGGT1_280370	E005	0.014254533038537	0.000269581312938418	0.0104054213948285	69.9600404885145	-0.459414499234903
TGGT1_310560:E028	TGGT1_310560	E028	0.0598051339735054	0.00026958790382845	0.0104054213948285	16.6194081113266	1.06692497957819
TGGT1_313480:E001	TGGT1_313480	E001	0.0023330182525639	0.000269347119674841	0.0104054213948285	812.416571189125	-0.127582616786616
TGGT1_217610:E001	TGGT1_217610	E001	0.00955622018898885	0.000271387405467187	0.0104584677627371	104.581490837598	-0.343917555085542
TGGT1_277760:E013	TGGT1_277760	E013	0.0101032284386917	0.000271486779266097	0.0104584677627371	98.8841297506047	0.367331289777334
TGGT1_286560:E003	TGGT1_286560	E003	0.0344355059408727	0.000271436273984956	0.0104584677627371	28.8855870104874	-0.686987578549469
No_genes_on_ref_contig_750+No_genes_on_ref_contig_749+No_genes_on_ref_contig_748+No_genes_on_ref_contig_738+No_genes_on_ref_contig_739+No_genes_on_ref_contig_743+No_genes_on_ref_contig_742+No_genes_on_ref_contig_741+No_genes_on_ref_contig_740+No_genes_on_ref_contig_747+No_genes_on_ref_contig_746+No_genes_on_ref_contig_745+No_genes_on_ref_contig_744+No_genes_on_ref_contig_737:E016	No_genes_on_ref_contig_750+No_genes_on_ref_contig_749+No_genes_on_ref_contig_748+No_genes_on_ref_contig_738+No_genes_on_ref_contig_739+No_genes_on_ref_contig_743+No_genes_on_ref_contig_742+No_genes_on_ref_contig_741+No_genes_on_ref_contig_740+No_genes_on_ref_contig_747+No_genes_on_ref_contig_746+No_genes_on_ref_contig_745+No_genes_on_ref_contig_744+No_genes_on_ref_contig_737	E016	0.0119973334228236	0.000272118196438361	0.0104774516165075	83.191125659826	-0.301393216290702
TGGT1_282070:E019	TGGT1_282070	E019	0.0284082939049736	0.000274177264732817	0.0105513574455376	35.0275273427068	-0.632149599147739
TGGT1_206550:E036	TGGT1_206550	E036	0.0435693730109247	0.000275498324881774	0.0105968012169029	22.821355582863	0.844559742684618
TGGT1_278930:E039	TGGT1_278930	E039	0.0510199790903802	0.000276042296326726	0.0106123239272465	19.4846092913914	-0.910409998169264
TGGT1_246450:E005	TGGT1_246450	E005	0.00529014962414021	0.00027618559916003	0.0106124351579631	189.922482911302	0.247515891391824
TGGT1_311000:E009	TGGT1_311000	E009	0.00618960985059758	0.00027847947077773	0.010695139918863	162.042871389666	0.254739461225058
TGGT1_261940:E016	TGGT1_261940	E016	0.0594797031489939	0.000279000860703239	0.0107097222212657	20.1994325814461	0.885767821645025
TGGT1_219850:E006	TGGT1_219850	E006	0.013041526359068	0.000279732854445514	0.010732369850102	76.4983217096658	0.423192359283365
TGGT1_242870:E025	TGGT1_242870	E025	0.141764191326495	0.000280837010907392	0.0107677302472293	12.2886149098414	1.40705275290438
TGGT1_281450:E010	TGGT1_281450	E010	0.0197433939685371	0.000280939430651956	0.0107677302472293	50.4489074792873	0.530536918903387
TGGT1_291350:E009	TGGT1_291350	E009	0.0223517183217689	0.000281686824236708	0.0107909039784383	44.5453453676138	0.545082599971182
TGGT1_295760:E008	TGGT1_295760	E008	0.00464129875156031	0.000282422267979065	0.0108135966861164	216.834630871199	-0.226283704133695
TGGT1_216460:E001	TGGT1_216460	E001	0.0636429526308547	0.000282847472597095	0.0108196853248326	15.6162373879307	1.00843543951505
TGGT1_266640:E032	TGGT1_266640	E032	0.00646860473458713	0.000282867590191702	0.0108196853248326	189.17144451408	-0.28561036068344
TGGT1_310560:E027	TGGT1_310560	E027	0.0668403538058756	0.000283539264434872	0.0108398910897908	14.8685163310503	1.14182515404157
TGGT1_204050:E014	TGGT1_204050	E014	0.00705872825424462	0.000284481493752371	0.0108704146920079	293.159339150493	-0.273041074872981
TGGT1_280370:E006	TGGT1_280370	E006	0.0140883726623402	0.000285222424620134	0.0108932194530768	70.7888231479233	-0.45557127557581
TGGT1_254420:E008	TGGT1_254420	E008	0.0338399818729963	0.000286190704829735	0.0109136558286786	29.3948596579056	0.693713726274179
TGGT1_265520:E012	TGGT1_265520	E012	0.0264523800473645	0.000285964382705525	0.0109136558286786	37.6236074118902	0.610236206333929
TGGT1_271460:E007	TGGT1_271460	E007	0.169566892014274	0.000286167437651368	0.0109136558286786	17.8342132864315	1.38414484110964
TGGT1_267800:E010	TGGT1_267800	E010	0.0187591505745014	0.000286885691142074	0.0109346416076149	53.1046455102602	0.497026505719656
TGGT1_270160:E003	TGGT1_270160	E003	0.0170025627526351	0.000287839064676652	0.0109654496907211	58.6112209664854	0.455970187029956
TGGT1_262530:E022	TGGT1_262530	E022	0.0663402973843537	0.000288776104386822	0.0109956047968588	14.9806967610858	1.02494491005257
TGGT1_316710:E003	TGGT1_316710	E003	0.0069047911754127	0.00028992993739393	0.0110339801249285	145.106114512473	-0.286217370174404
TGGT1_213830:E009	TGGT1_213830	E009	0.00149716239358473	0.00029315172765366	0.011150978298701	691.96430182157	-0.0909884315060024
TGGT1_233830:E012	TGGT1_233830	E012	0.0767570716273869	0.000293670513882132	0.0111650929478065	19.0494980936443	1.02670958045832
TGGT1_219260A:E016	TGGT1_219260A	E016	0.0562479503129006	0.000296354385424959	0.0112614666461484	17.6716031146815	0.9500168073771
TGGT1_270530:E008	TGGT1_270530	E008	0.0304201712418431	0.00029883206090284	0.0113499119734465	32.7061844038878	0.646417244549023
TGGT1_230690:E017	TGGT1_230690	E017	0.00190603409761093	0.000299241408709208	0.0113597509558309	538.514428402762	-0.133835857433681
TGGT1_217770:E002	TGGT1_217770	E002	0.0116838223570556	0.000300671354325925	0.0114083043688063	85.435348165605	0.379678640762477
TGGT1_270140:E007	TGGT1_270140	E007	0.153166940206807	0.000301460658317789	0.0114267800787237	6.48504704412792	1.76527271634666
TGGT1_313360:E003	TGGT1_313360	E003	0.00447015890733724	0.000301450442559465	0.0114267800787237	754.039112815477	0.0468310723467747
TGGT1_232320:E018	TGGT1_232320	E018	0.0358390154406951	0.000302574005898623	0.0114632323377593	27.7524151477791	0.709677278102149
TGGT1_244640:E016	TGGT1_244640	E016	0.0557304319240098	0.000304677542628508	0.0115371433000741	17.8358869719829	0.908976693876443
TGGT1_275750:E004	TGGT1_275750	E004	0.00193913816338787	0.000305329252345369	0.0115560318231185	529.016125074336	-0.145943878064722
TGGT1_266930:E007	TGGT1_266930	E007	0.0454369226875156	0.000308313268338038	0.0116631298536164	21.882064210499	0.786661037640372
TGGT1_310140:E014	TGGT1_310140	E014	0.0976617545716277	0.000309058261190645	0.0116854634803958	10.1731173193244	-1.37618252938477
[truncated: 686 more rows]
