# Supplementary material for: A serine–arginine-rich (SR) splicing factor modulates alternative splicing of over a thousand genes in Toxoplasma gondii
Source: Oxford University Press journal article supplement (doi:10.1093/nar/gkv311), 2015-04-13
Supplement: gkv311_Supplementary_Data.zip [file gkv311_Supplementary_Data.zip › nar-03398-a-2014-File018.txt]

geneID	exonID	dispersion	pvalue	padjust	meanBase	log2fold(treated/untreated)
TGGT1_242070:E002	TGGT1_242070	E002	0.00064008447132198	3.77431362188264e-148	2.90006935764596e-143	1639.5068893738	0.611731164293187
TGGT1_230340:E004	TGGT1_230340	E004	0.00371170288788775	1.77676585624128e-122	6.82606790480057e-118	269.994989555943	1.500756976908
TGGT1_265520:E008	TGGT1_265520	E008	0.00403896784592631	2.17618614675941e-86	5.57372049861842e-82	247.929525927974	1.47563665629426
TGGT1_263630:E003	TGGT1_263630	E003	0.00344623089396639	1.50339500028534e-83	2.88790904092313e-79	368.392540461351	1.12664720456258
TGGT1_275802:E014	TGGT1_275802	E014	0.00915842939896013	2.90997322610112e-70	4.47187225547863e-66	108.815222308947	2.42149478914434
TGGT1_315780:E008	TGGT1_315780	E008	0.00769973574981349	6.23492272471865e-69	7.98454595665344e-65	129.522815173281	1.78372875927381
TGGT1_206550:E001	TGGT1_206550	E001	0.00690382747837996	2.24810925448746e-64	2.4676852969579e-60	144.529909824558	-1.38493883061519
TGGT1_236210:E002	TGGT1_236210	E002	0.00759207602961052	1.60390915828298e-61	1.54049459993737e-57	152.509937833901	1.6685519341173
TGGT1_304520:E011	TGGT1_304520	E011	0.00524460989975162	1.62048046652393e-60	1.38347619562555e-56	190.557287260716	1.43569013675431
TGGT1_312230:E011	TGGT1_312230	E011	0.0133122638040661	2.0416301850633e-59	1.56872738529709e-55	74.7732514593569	2.96096403540621
TGGT1_233710:E012	TGGT1_233710	E012	0.0125310843745559	4.3712840387477e-58	3.05342137895688e-54	79.4474439186634	2.8133686872195
TGGT1_289950:E010	TGGT1_289950	E010	0.0109582098689992	9.85708106627215e-55	6.31157114907628e-51	90.8868853605924	2.30015110214799
TGGT1_221870:E011	TGGT1_221870	E011	0.00393592652493283	7.20186591327404e-54	4.25669054752491e-50	254.477681109894	1.05649794906422
TGGT1_202160:E009	TGGT1_202160	E009	0.00940166998876323	1.05200227943157e-49	5.77376422462027e-46	105.989571859194	2.10699827278425
TGGT1_236070:E006	TGGT1_236070	E006	0.00475010376796129	1.99158203756234e-47	1.02018126013452e-43	210.54035651232	0.928817827998002
TGGT1_211420:E006	TGGT1_211420	E006	0.00354477975703199	4.45433470607504e-47	2.1391107238168e-43	2578.40377853917	0.71645770617836
TGGT1_271460:E015	TGGT1_271460	E015	0.010670124985489	5.7587670859812e-45	2.60286109756199e-41	93.3487245228928	1.72399673316492
TGGT1_201780:E002	TGGT1_201780	E002	0.00188618851246234	1.18696212326505e-44	5.06681159251758e-41	1163.49878400726	0.560879132307998
TGGT1_229030:E014	TGGT1_229030	E014	0.00388805371667806	2.5806642129162e-44	1.04363419014654e-40	257.63908473712	0.868833081416031
TGGT1_315780:E009	TGGT1_315780	E009	0.0107382169445187	9.39311688789448e-44	3.60869461157574e-40	92.7548829527453	1.63511131906666
TGGT1_295910:E009	TGGT1_295910	E009	0.00714198382139015	8.53492099454883e-43	3.12284630694357e-39	139.687009817849	1.27745052876008
TGGT1_264830:E007	TGGT1_264830	E007	0.0141174923632327	1.31321187920693e-41	4.5865118710283e-38	70.4979056561478	2.13078085208033
TGGT1_209040:E005	TGGT1_209040	E005	0.00396397678335777	1.54789285476168e-41	5.17110622962275e-38	252.66110103468	0.705212734751336
TGGT1_209040:E001	TGGT1_209040	E001	0.00460959096352089	2.43775443672619e-41	7.80457240228043e-38	1048.67102778132	-0.571120864226879
TGGT1_256830:E012	TGGT1_256830	E012	0.0162461853782981	4.4977680692207e-41	1.38238002053884e-37	61.2410873385291	2.52349465628902
TGGT1_215740:E019	TGGT1_215740	E019	0.00986878790053998	6.37813754319383e-41	1.88491136310148e-37	100.955170656281	1.7392235044274
TGGT1_256970:E005	TGGT1_256970	E005	0.00873477284722053	1.23137000345593e-39	3.50425099835346e-36	114.113954027593	1.40993564328291
TGGT1_200290:E009	TGGT1_200290	E009	0.00495214708186509	1.83557365685791e-39	5.03714189542827e-36	278.574167623919	-0.916096017402212
TGGT1_233260:E023	TGGT1_233260	E023	0.00937757112392951	3.75730366650018e-39	9.62333139409581e-36	106.262954672073	1.31642212656627
TGGT1_310450:E017	TGGT1_310450	E017	0.00429351871148046	3.65662617891978e-39	9.62333139409581e-36	233.111314787951	0.904009751723956
TGGT1_250010:E015	TGGT1_250010	E015	0.0143111321221815	5.09874421083129e-39	1.26378131912143e-35	69.5417122927071	2.21780656777797
TGGT1_306310:E010	TGGT1_306310	E010	0.0179496814280915	5.81186071037468e-39	1.39551856688456e-35	55.4178645331685	3.18792354617715
TGGT1_219700:E007	TGGT1_219700	E007	0.0175376995287045	1.26033737201366e-38	2.93456189858828e-35	70.1855640029724	2.20896606648248
TGGT1_259010:E003	TGGT1_259010	E003	0.00872430464609915	1.41971624085103e-38	3.20843343524324e-35	114.251422157037	1.36439913418451
TGGT1_239330:E004	TGGT1_239330	E004	0.0101405200694447	3.26688704941736e-38	7.1719371490309e-35	239.564413012349	1.26578498232922
TGGT1_275802:E015	TGGT1_275802	E015	0.0203219095279438	1.108144914411e-37	2.36518141079439e-34	48.9377876124857	3.05729689568378
TGGT1_294360:E015	TGGT1_294360	E015	0.0145007815055471	3.30497786827955e-37	6.86336714770259e-34	68.6300360482974	1.84613518240043
TGGT1_203980:E007	TGGT1_203980	E007	0.00448658121471554	4.8607663983489e-36	9.8285975723667e-33	223.002491634445	0.9288861734425
TGGT1_270770:E004	TGGT1_270770	E004	0.0136893974961752	1.07092986853678e-35	2.10992405919898e-32	72.7080903693547	1.88631218675809
TGGT1_254370:E023	TGGT1_254370	E023	0.0172643678694279	5.00422252143479e-35	9.61273614698712e-32	57.6220989623308	2.25115808529341
TGGT1_261480:E007	TGGT1_261480	E007	0.00324681892669789	9.38579329028114e-35	1.75896633913496e-31	309.06872430789	0.651726052576346
TGGT1_309980:E066	TGGT1_309980	E066	0.00799216454029166	1.21130566009635e-34	2.21602602392437e-31	124.763087414268	1.22886612269737
TGGT1_240280:E015	TGGT1_240280	E015	0.00966213581717316	2.19098125507931e-34	3.91507969061694e-31	105.041795761357	1.32033318754851
TGGT1_265520:E021	TGGT1_265520	E021	0.00771758247198358	3.51041689603162e-34	6.13022506909958e-31	129.221950894175	1.21886809163853
TGGT1_206510:E011	TGGT1_206510	E011	0.0324411511579307	6.52177569073007e-34	1.11358595277473e-30	111.027565895848	2.37286289425355
TGGT1_206550:E002	TGGT1_206550	E002	0.00698782868207717	7.1668686344838e-34	1.19713192449529e-30	142.783878573327	-1.0580953730398
TGGT1_233110:E006	TGGT1_233110	E006	0.0157146489430654	4.38553330751489e-33	7.16960048403237e-30	63.31708293274	1.87334665264971
TGGT1_201780:E007	TGGT1_201780	E007	0.00501101124994344	1.36397196970183e-32	2.1834065465829e-29	824.520092115427	0.745820980493914
TGGT1_285980A:E012	TGGT1_285980A	E012	0.00559667596323074	2.19608631090476e-32	3.44368742593856e-29	178.495631896586	0.90519540320924
TGGT1_300250:E002	TGGT1_300250	E002	0.0200066346486997	2.70240579266172e-32	4.15289507781498e-29	76.4675200452421	1.91429859565681
TGGT1_273490:E006	TGGT1_273490	E006	0.0144292111223455	5.14261186761606e-32	7.74789937396108e-29	68.9712645938781	1.77434307853224
TGGT1_217020:E011	TGGT1_217020	E011	0.0102011966738671	5.30809375602186e-32	7.84342307560484e-29	159.787431752783	1.15161511162353
TGGT1_309400:E006	TGGT1_309400	E006	0.00750727930996749	5.97757437595468e-32	8.66601664764585e-29	132.85859970414	1.33002872435924
TGGT1_213830:E005	TGGT1_213830	E005	0.018451971672831	9.83165622853149e-32	1.39895364746606e-28	53.9064795685186	1.87588429870485
TGGT1_222410:E011	TGGT1_222410	E011	0.0137584012694208	1.10349151925661e-31	1.54161777936582e-28	72.3425134506413	2.35052962246852
TGGT1_233230:E007	TGGT1_233230	E007	0.0107430290600817	2.51233387552844e-31	3.44714639274962e-28	206.215185543484	1.14979272737112
TGGT1_309600:E012	TGGT1_309600	E012	0.0226811901302326	2.5726844014692e-31	3.46802370799455e-28	181.133862500604	1.68326640378004
TGGT1_244390:E004	TGGT1_244390	E004	0.00808005487118891	3.28329484829162e-31	4.34962976307212e-28	123.400160604579	1.1161228758462
TGGT1_300310:E007	TGGT1_300310	E007	0.0164968493914438	2.01738862024402e-30	2.58350149022817e-27	60.3085983476995	1.84322173832905
TGGT1_312110:E012	TGGT1_312110	E012	0.0136751965034689	1.99472629975092e-30	2.58350149022817e-27	72.7837851049956	1.71385854149251
TGGT1_230150:E002	TGGT1_230150	E002	0.00181016331221147	2.55367281126628e-30	3.2166648819552e-27	559.133836538562	0.418316239326951
TGGT1_205130:E009	TGGT1_205130	E009	0.00731767749432362	4.79018026109276e-30	5.93650130196104e-27	136.317298396691	1.02841822941501
TGGT1_217020:E022	TGGT1_217020	E022	0.00115849898401964	8.56790337175543e-30	1.04497141488186e-26	1727.71860291698	-0.301677627089024
TGGT1_257300:E011	TGGT1_257300	E011	0.00764276159326609	1.1954966044708e-29	1.43528707183942e-26	130.49274461434	1.02921670754208
TGGT1_308000:E021	TGGT1_308000	E021	0.0109060487220157	1.56656580682763e-29	1.85184949075715e-26	91.3229570733326	1.33700845873489
TGGT1_310100:E019	TGGT1_310100	E019	0.0142359078684046	3.12768937479534e-29	3.64124649229015e-26	69.9100724220747	1.79824134633862
TGGT1_272320:E017	TGGT1_272320	E017	0.0134763397709469	1.17779569606708e-28	1.35072071490607e-25	73.8605403942433	1.56843762627291
TGGT1_222660:E002	TGGT1_222660	E002	0.00985345876795407	1.25354017273345e-28	1.41644509194588e-25	101.112779939988	1.23332921163922
TGGT1_306310:E002	TGGT1_306310	E002	0.0183588078558832	1.81248425931574e-28	2.01834569613107e-25	54.1805494078777	2.09494168085645
TGGT1_261022:E106	TGGT1_261022	E106	0.010593649497119	4.52248374620938e-28	4.96420119439272e-25	94.0248117271604	1.24155047867623
TGGT1_410800:E023	TGGT1_410800	E023	0.0086010274130694	4.98417744574445e-28	5.39393299153051e-25	115.895570223236	1.07682748623548
TGGT1_312110:E013	TGGT1_312110	E013	0.0171310401082393	1.08750935484044e-27	1.16056883747048e-24	58.0714668702222	1.90638902818717
TGGT1_222410:E009	TGGT1_222410	E009	0.0166592519375362	3.7438396649207e-27	3.94062203196591e-24	59.7194596708907	2.45816223693544
TGGT1_229640:E006	TGGT1_229640	E006	0.0106722216571533	6.19955473448957e-27	6.43723225856723e-24	93.3303256511472	1.20259672993095
TGGT1_227620:E002	TGGT1_227620	E002	0.00200021437061643	1.04157715270581e-26	1.06708884909941e-23	3692.09366144934	-0.388246503176818
No_genes_on_ref_contig_268+No_genes_on_ref_contig_269+No_genes_on_ref_contig_272+No_genes_on_ref_contig_271+No_genes_on_ref_contig_270:E006	No_genes_on_ref_contig_268+No_genes_on_ref_contig_269+No_genes_on_ref_contig_272+No_genes_on_ref_contig_271+No_genes_on_ref_contig_270	E006	0.00351695843124234	1.17654624242885e-26	1.18950373196718e-23	285.093632811084	-0.66188123114878
TGGT1_294350:E026	TGGT1_294350	E026	0.024993174339899	1.43709823803823e-26	1.43405606904082e-23	39.7785836192613	2.56067279200158
TGGT1_236840:E002	TGGT1_236840	E002	0.0176740786396612	2.01347373949575e-26	1.98345232976455e-23	56.2837207717161	1.76857521881047
TGGT1_249390:E036	TGGT1_249390	E036	0.00627685599487427	2.56057937835562e-26	2.49047136322419e-23	237.547252792403	0.834233816261569
TGGT1_285980A:E011	TGGT1_285980A	E011	0.00738229474426753	3.07932619429518e-26	2.95757733488823e-23	135.118506293336	0.940180228125773
TGGT1_263810:E002	TGGT1_263810	E002	0.0199121379712671	3.92080458418556e-26	3.71929459055637e-23	49.9466266988563	1.83552529117401
TGGT1_273130:E004	TGGT1_273130	E004	0.0052171650413881	4.84660646692871e-26	4.54144757438294e-23	1313.57528266625	-0.140040463064359
TGGT1_267620:E027	TGGT1_267620	E027	0.0131690872640158	8.3663946923505e-26	7.74516468645946e-23	154.812527940579	1.16108773400377
TGGT1_262490:E005	TGGT1_262490	E005	0.00971485192827254	9.99725569843067e-26	9.14475162024187e-23	102.56055358065	1.09514783044594
TGGT1_306310:E014	TGGT1_306310	E014	0.0240719306042918	1.63722624685882e-25	1.4799947427046e-22	41.3031146279967	2.60079294593989
TGGT1_280710:E006	TGGT1_280710	E006	0.0222910710548785	1.88460291493565e-25	1.68380504854547e-22	44.6079870139808	2.03662727067244
TGGT1_315150:E007	TGGT1_315150	E007	0.0107334542674829	4.40360515390911e-25	3.88919320932085e-22	92.7961732089429	1.30120506898192
TGGT1_294960:E018	TGGT1_294960	E018	0.00934682885911718	6.02781962576117e-25	5.26317700664331e-22	106.613755480062	1.06810158920824
TGGT1_221470:E012	TGGT1_221470	E012	0.00898350479429229	9.92072038711908e-25	8.5649257571356e-22	110.942219924902	1.04242786911408
TGGT1_314970:E002	TGGT1_314970	E002	0.0166276723124988	1.05828886119526e-24	9.03508235862889e-22	59.8331161130272	1.61059644245217
TGGT1_242790B:E022	TGGT1_242790B	E022	0.0151501471234324	1.0730272008613e-24	9.06024077281098e-22	65.6816966458204	1.37535565659771
TGGT1_209250:E005	TGGT1_209250	E005	0.00490678425166066	1.21407074366128e-24	1.01397341011632e-21	203.769870823932	0.767635619548256
TGGT1_270840:E033	TGGT1_270840	E033	0.0301544832719965	1.25781101190263e-24	1.03920886797379e-21	35.2188407142005	2.9463508631857
TGGT1_271145:E001	TGGT1_271145	E001	0.00403363008316015	1.6000836567447e-24	1.3079322120563e-21	479.630874882559	-0.46641740301105
TGGT1_217020:E041	TGGT1_217020	E041	0.0071240267670878	1.64846937202776e-24	1.33329938040523e-21	140.040824109359	0.884337338788865
TGGT1_289950:E009	TGGT1_289950	E009	0.026845751590835	2.9060831021527e-24	2.32598653458444e-21	37.0300000185623	2.48500624463545
TGGT1_261022:E058	TGGT1_261022	E058	0.028331727842148	3.97305995163422e-24	3.14719595364658e-21	35.0854368066175	2.26492975208722
TGGT1_219070:E028	TGGT1_219070	E028	0.0255493167796305	4.72159397515222e-24	3.70197057417114e-21	38.9115352692901	2.1448561697706
TGGT1_222350:E019	TGGT1_222350	E019	0.0199019597169536	5.87697609751549e-24	4.56130517580603e-21	52.6237991625558	1.6871358928642
TGGT1_253360:E011	TGGT1_253360	E011	0.015820027403524	6.99648394469077e-24	5.37588836858204e-21	62.8944003763246	1.4562988220618
TGGT1_247420:E004	TGGT1_247420	E004	0.00502896387543543	1.62932479924771e-23	1.23952900593858e-20	198.785021815122	0.706716673122616
TGGT1_297500:E017	TGGT1_297500	E017	0.00878116148532257	1.88783959452095e-23	1.42211696984516e-20	113.508739597562	0.998537299489002
TGGT1_299810:E004	TGGT1_299810	E004	0.0198820180611103	3.78457295375272e-23	2.82325468007279e-20	50.0224240736947	1.64696805138597
TGGT1_217020:E042	TGGT1_217020	E042	0.00677157492819927	4.17124852487218e-23	3.08179060486158e-20	147.367123136923	0.834382488339299
TGGT1_283510:E016	TGGT1_283510	E016	0.00169255858593509	4.25874003547532e-23	3.11646483910302e-20	598.793323931173	0.373765599762708
TGGT1_230420:E026	TGGT1_230420	E026	0.0180973539760792	4.31876602990916e-23	3.13057571169934e-20	54.964796132563	1.60511207334359
TGGT1_318710:E011	TGGT1_318710	E011	0.0170262620112972	4.81630831274001e-23	3.45860450304677e-20	58.429559606908	1.53487061827161
TGGT1_282055:E034	TGGT1_282055	E034	0.0113064276039791	4.93959526255843e-23	3.51429334434446e-20	88.0791584774849	1.09714049638762
TGGT1_260310:E035	TGGT1_260310	E035	0.0261351959026333	6.06951145702766e-23	4.27856010847371e-20	38.038091984654	2.09982608051237
TGGT1_209120:E002	TGGT1_209120	E002	0.014399903391024	6.92060019181602e-23	4.83416506307788e-20	69.1119772967878	1.21528009629788
TGGT1_250010:E014	TGGT1_250010	E014	0.0214499823795839	7.89127636620263e-23	5.46254055990911e-20	46.3599585535033	1.91328243968083
TGGT1_217182:E013	TGGT1_217182	E013	0.00500451535790933	8.05218743473437e-23	5.48751261611066e-20	199.762890634586	0.744071730234975
TGGT1_222410:E010	TGGT1_222410	E010	0.0201871836417051	8.07018657184045e-23	5.48751261611066e-20	49.2649497384049	2.4792810459242
TGGT1_280400:E010	TGGT1_280400	E010	0.00702961179534137	8.53087032543994e-23	5.74988143154235e-20	141.931000728973	0.826655453291092
TGGT1_267300:E003	TGGT1_267300	E003	0.00932677615128195	1.00784372893348e-22	6.73388596522274e-20	106.843828294579	0.987234106636663
TGGT1_243280A:E010	TGGT1_243280A	E010	0.0275858589229092	1.15853909230455e-22	7.67402312374179e-20	36.035268725224	3.00535431266157
TGGT1_228460:E010	TGGT1_228460	E010	0.016910818836717	1.94182236874357e-22	1.27524619954829e-19	58.8292500672111	1.50546589706607
TGGT1_209200:E010	TGGT1_209200	E010	0.0333975204131635	4.19806782194207e-22	2.73361811215731e-19	29.7581111190257	2.42730040792712
TGGT1_290850:E012	TGGT1_290850	E012	0.016609944350495	4.59876917921993e-22	2.96937502036741e-19	59.8971096177951	1.43528306599552
TGGT1_242030:E014	TGGT1_242030	E014	0.018633700063857	4.84290857741835e-22	3.10095471969245e-19	53.3797713944949	1.60503782239811
TGGT1_203390:E004	TGGT1_203390	E004	0.00825770250860269	4.97024219697973e-22	3.15618594784572e-19	120.734312075741	0.891992883018269
TGGT1_309400:E024	TGGT1_309400	E024	0.0206329814827517	5.71930148619953e-22	3.602081707337e-19	48.198743262137	-1.45377723312125
TGGT1_305480:E007	TGGT1_305480	E007	0.019355261347061	9.73141267696775e-22	6.07912647040789e-19	51.3862254621655	1.75807166008178
TGGT1_275802:E018	TGGT1_275802	E018	0.0228767879210191	1.58894802020914e-21	9.8459676636137e-19	82.9112878987374	1.50179383670478
TGGT1_226590:E003	TGGT1_226590	E003	0.00478052354386779	2.00603448208682e-21	1.23310137200084e-18	239.10541944776	-0.649445891211263
TGGT1_297650:E005	TGGT1_297650	E005	0.00610397089895375	2.53254636407709e-21	1.54439099187771e-18	163.576655072899	0.766387805002808
TGGT1_320300:E004	TGGT1_320300	E004	0.0239429573327679	2.9318408802799e-21	1.77380990329186e-18	41.5259229507207	2.48649999527402
TGGT1_292080:E015	TGGT1_292080	E015	0.0291889416198471	2.98080524793239e-21	1.78934478777641e-18	34.0538360132639	2.21472403514575
TGGT1_208530:E015	TGGT1_208530	E015	0.0277438137500024	3.57737798658471e-21	2.13081389422643e-18	35.8298522459318	2.12802564774488
TGGT1_203170:E019	TGGT1_203170	E019	0.00748568662047166	3.84963819501581e-21	2.27534346146484e-18	133.243610048183	0.839010392255324
TGGT1_217020:E003	TGGT1_217020	E003	0.00996233808614566	4.19621299298919e-21	2.46125509726955e-18	126.093643461881	0.936055659832868
TGGT1_237220:E025	TGGT1_237220	E025	0.0173216729425473	4.36283906009754e-21	2.53960200652056e-18	57.4310877839444	-1.44861264756844
TGGT1_310860:E006	TGGT1_310860	E006	0.0317044985315251	6.8335862161694e-21	3.94791176008878e-18	31.3489281255628	2.26461636606329
TGGT1_250010:E013	TGGT1_250010	E013	0.0291259322421034	7.13361600020812e-21	4.09048994483576e-18	34.1275935651928	2.3685585225739
TGGT1_209970:E013	TGGT1_209970	E013	0.0197635503368799	8.69598741798469e-21	4.94943396470881e-18	50.3227958604456	1.61412100531428
TGGT1_300310:E010	TGGT1_300310	E010	0.0106915932626776	9.0797255351431e-21	5.12984463929258e-18	93.1606769144458	1.04233238865011
TGGT1_256970:E014	TGGT1_256970	E014	0.00871377185978503	9.27355627189222e-21	5.20111126469622e-18	114.390073098326	0.933619220446145
TGGT1_272320:E019	TGGT1_272320	E019	0.0252067502890144	1.08947533649674e-20	6.06608814713043e-18	39.4410787508694	2.01023345054819
TGGT1_205510:E004	TGGT1_205510	E004	0.0128681835465437	1.18677243571545e-20	6.56029019014879e-18	77.3606136957927	1.19850042174731
TGGT1_294870:E004	TGGT1_294870	E004	0.00999365028123423	1.80024368308126e-20	9.88038027692247e-18	105.545883630869	0.982304139177849
TGGT1_288860:E007	TGGT1_288860	E007	0.0137636860747092	2.13787468551702e-20	1.15681603669768e-17	72.3146664407808	1.24509755549431
TGGT1_309600:E013	TGGT1_309600	E013	0.0190315298795561	2.12960752731082e-20	1.15681603669768e-17	52.2619075946329	1.50590675052758
TGGT1_261022:E105	TGGT1_261022	E105	0.0137376333004745	2.57049431570249e-20	1.38118231982959e-17	72.452153321059	1.17920401346566
TGGT1_241880:E011	TGGT1_241880	E011	0.0221145415015464	2.59296143663084e-20	1.38357901323892e-17	44.9646275013154	1.69159445252945
TGGT1_311240:E004	TGGT1_311240	E004	0.00536170997091495	2.70089917882207e-20	1.43123441519415e-17	186.368532798449	0.687613862559858
TGGT1_297180:E005	TGGT1_297180	E005	0.0057216901761252	3.8647820503798e-20	2.03396067400707e-17	174.571974276911	0.703510225954348
TGGT1_254470:E008	TGGT1_254470	E008	0.0026346426876269	5.58779601368867e-20	2.92074477757684e-17	381.836389408494	-0.471778101302386
TGGT1_310450:E016	TGGT1_310450	E016	0.00601735212090185	6.8070626191841e-20	3.53401534101519e-17	165.944901475064	0.736312942099811
TGGT1_278490:E005	TGGT1_278490	E005	0.0179099139566305	1.20246268360836e-19	6.20091444432321e-17	55.5411529433035	1.31524885710339
TGGT1_277840:E006	TGGT1_277840	E006	0.0165623762920096	1.43346161277802e-19	7.34285932940165e-17	60.069496764644	1.29287959735097
TGGT1_261480:E003	TGGT1_261480	E003	0.0287403016129918	1.53554837546722e-19	7.81370400832943e-17	34.5860603513838	1.88946332276863
TGGT1_314970:E012	TGGT1_314970	E012	0.030191906447262	1.65947664404957e-19	8.38876361176558e-17	32.9212841285117	2.18064676100635
TGGT1_214240:E003	TGGT1_214240	E003	0.0286888123054663	2.16382190874984e-19	1.08667701962491e-16	34.648208547487	2.47600491085614
TGGT1_320300:E007	TGGT1_320300	E007	0.00856444151675057	2.54955872094297e-19	1.27208080156555e-16	116.392661028375	0.982789620849165
TGGT1_297500:E016	TGGT1_297500	E016	0.0112515195176141	2.96352353124458e-19	1.46908553271122e-16	88.5103129920815	1.02286205138952
TGGT1_249620:E005	TGGT1_249620	E005	0.0213956905284017	3.4576594606044e-19	1.70305243573372e-16	46.4777877004534	1.40966164274417
TGGT1_218960:E005	TGGT1_218960	E005	0.0189916107657736	3.79419521248572e-19	1.8569081372087e-16	52.3719587389318	1.39528989576976
TGGT1_305040:E015	TGGT1_305040	E015	0.0122216841075767	4.01403866243335e-19	1.95206765003412e-16	81.4644077689252	1.12715814824861
TGGT1_262840:E002	TGGT1_262840	E002	0.0208211954198973	4.10205892855391e-19	1.98232642700187e-16	47.7623253638009	1.58182429510757
TGGT1_202540:E004	TGGT1_202540	E004	0.0165065974697365	4.73630932641489e-19	2.27452374821088e-16	60.2729080651459	1.32118911845377
TGGT1_248640:E016	TGGT1_248640	E016	0.0192836767565885	5.33318093929098e-19	2.54525232193976e-16	51.577322808024	1.40924295124002
TGGT1_314860:E012	TGGT1_314860	E012	0.0129437195125125	6.14209175000282e-19	2.91320928268498e-16	76.9079511804872	1.10538270218253
TGGT1_224350B:E003	TGGT1_224350B	E003	0.00994672016854	7.73608339627985e-19	3.64673276024512e-16	163.500642589287	0.831894670048452
TGGT1_306220:E016	TGGT1_306220	E016	0.0230886679885583	7.84075841536877e-19	3.67353874610787e-16	43.0646985512069	1.56997356097733
TGGT1_226020:E009	TGGT1_226020	E009	0.0132414207529927	9.44727417293044e-19	4.39939518560882e-16	75.1743423115827	-1.13211272922692
TGGT1_228630:E002	TGGT1_228630	E002	0.00950432158079174	1.54906305359339e-18	7.17020228005756e-16	104.840656185426	0.866566413830574
TGGT1_213072:E024	TGGT1_213072	E024	0.018331838783985	2.03691626395747e-18	9.3241224876911e-16	54.2604080751143	1.30763859164763
TGGT1_256820:E002	TGGT1_256820	E002	0.0232130173370406	2.03866962261945e-18	9.3241224876911e-16	42.8336625107778	1.61760203975834
TGGT1_233810:E023	TGGT1_233810	E023	0.0312676972542691	2.17818819746996e-18	9.90328085970409e-16	39.6149004575959	1.83654168464095
TGGT1_229750:E016	TGGT1_229750	E016	0.013314691304233	2.24453057812622e-18	1.00855553234786e-15	74.759583552687	1.10210224905691
TGGT1_244840:E011	TGGT1_244840	E011	0.0151222702210926	2.24198962916669e-18	1.00855553234786e-15	65.8030535587188	1.15414991021725
TGGT1_229030:E020	TGGT1_229030	E020	0.00259673814482728	2.26701351130275e-18	1.01273556493005e-15	609.032622141851	-0.372285853050692
TGGT1_235710:E002	TGGT1_235710	E002	0.0169635731288498	2.32202297092457e-18	1.03131375154295e-15	90.3575396776282	1.07502788239112
TGGT1_226220:E017	TGGT1_226220	E017	0.00935064229738408	2.45452860791989e-18	1.08390008417667e-15	106.570114450192	0.87109178856643
TGGT1_267710:E002	TGGT1_267710	E002	0.0294495920963854	2.48775429763236e-18	1.09229472552673e-15	33.7520808479318	1.85133671259041
TGGT1_254555:E006	TGGT1_254555	E006	0.0262729150223918	2.86079556259952e-18	1.24894857183784e-15	37.8384390165499	1.69295386804094
TGGT1_252380:E012	TGGT1_252380	E012	0.0111344671881239	3.11629628980149e-18	1.35280710745467e-15	89.4436816241344	1.0100041513712
TGGT1_261022:E108	TGGT1_261022	E108	0.0119552242228405	3.23532017873962e-18	1.39658593580796e-15	284.375638564509	0.849641218861728
TGGT1_233680:E011	TGGT1_233680	E011	0.0175103749333951	3.3151464491325e-18	1.42304976375416e-15	56.8109542662813	1.22898802778631
TGGT1_319920:E011	TGGT1_319920	E011	0.00980849931100595	3.88477811161146e-18	1.65830386534383e-15	101.577890170579	0.910881426922761
TGGT1_248640:E015	TGGT1_248640	E015	0.0196120322911336	3.94822884585206e-18	1.67607767861179e-15	50.7122638033465	1.37576915867809
TGGT1_222350:E016	TGGT1_222350	E016	0.00887144697644343	4.92174297585868e-18	2.07786793975853e-15	112.349038091502	0.840704065053576
TGGT1_250010:E017	TGGT1_250010	E017	0.023662464564845	5.00298373022766e-18	2.10062437639073e-15	42.0188868332533	1.68985281277573
TGGT1_239480:E019	TGGT1_239480	E019	0.0303230110110452	5.5157683855897e-18	2.30334291001932e-15	32.7787834263475	2.03603550538587
TGGT1_249320:E002	TGGT1_249320	E002	0.0103698099972715	7.883268785669e-18	3.27419850640243e-15	129.576336609699	0.867680399843678
TGGT1_208530:E014	TGGT1_208530	E014	0.0248735045177732	1.01558697352441e-17	4.19541162820941e-15	39.970229815013	1.64290866808962
TGGT1_297520:E015	TGGT1_297520	E015	0.0358870361812165	1.0468426871511e-17	4.30140382634381e-15	27.6917764777108	2.24601947043463
TGGT1_263320:E004	TGGT1_263320	E004	0.00524465647883708	1.08734094089736e-17	4.44404339764525e-15	377.244851701689	0.529167119511471
TGGT1_207900:E002	TGGT1_207900	E002	0.0307731788749198	1.13524547428993e-17	4.6152834131225e-15	32.298737854507	1.83010090226182
TGGT1_277030:E027	TGGT1_277030	E027	0.0434567197166315	1.209437530229e-17	4.89102902685292e-15	22.8643378040157	2.96829944016828
TGGT1_273360:E016	TGGT1_273360	E016	0.019341887586112	1.29539139003618e-17	5.21120357257644e-15	51.4218195043169	1.34223643417754
TGGT1_262140:E010	TGGT1_262140	E010	0.00789881663294859	1.35390946209298e-17	5.41824694473117e-15	126.244005586144	0.76406139498806
TGGT1_295910:E006	TGGT1_295910	E006	0.0115452824578334	1.58096720626559e-17	6.29413353512066e-15	86.2514652353204	0.975595530014274
TGGT1_222410:E002	TGGT1_222410	E002	0.00531498270334058	1.59433173392354e-17	6.31462203296305e-15	188.017725343785	0.690201911044322
TGGT1_233260:E019	TGGT1_233260	E019	0.0319163282077982	1.62470267571617e-17	6.40191176892324e-15	31.1406389911748	1.73903719329238
TGGT1_281545:E018	TGGT1_281545	E018	0.0195177852723795	1.64514639851904e-17	6.44939356239833e-15	50.9575759066119	1.41625196315231
TGGT1_280560:E015	TGGT1_280560	E015	0.0197243976156838	1.75182205046437e-17	6.83272847165132e-15	50.4228612283069	1.38590692823831
TGGT1_224350A:E004	TGGT1_224350A	E004	0.0113305313602608	1.80032216805757e-17	6.98643204176968e-15	130.321095537837	0.93352298971684
TGGT1_290850:E016	TGGT1_290850	E016	0.0429811500323391	1.96292507006196e-17	7.57915947780659e-15	45.1138447098546	1.97494918825794
TGGT1_275750:E003	TGGT1_275750	E003	0.00907730844074586	2.28804240751009e-17	8.79031572329265e-15	341.467532308347	0.685744564315207
TGGT1_281510:E018	TGGT1_281510	E018	0.0284952752401101	2.5211827569555e-17	9.63781689035771e-15	34.8838211869474	1.81853656049726
TGGT1_213610:E007	TGGT1_213610	E007	0.0144946805200955	2.67213438529397e-17	1.01221294442952e-14	68.6589922262931	-1.13247468691065
TGGT1_261022:E104	TGGT1_261022	E104	0.0151924495364964	2.67422241523214e-17	1.01221294442952e-14	65.4983935712795	1.12859875775109
TGGT1_222660:E027	TGGT1_222660	E027	0.0331873781031762	2.98045002602263e-17	1.12259234632108e-14	29.9467355519894	2.03504092661579
TGGT1_227840:E005	TGGT1_227840	E005	0.00926202325077799	3.90930869033583e-17	1.46526610653334e-14	117.113149840297	0.82595089363722
TGGT1_312110:E014	TGGT1_312110	E014	0.0344814177405088	4.25878799169018e-17	1.58850724717232e-14	28.8217498371354	2.33970752490022
TGGT1_217020:E009	TGGT1_217020	E009	0.0169694199344693	4.70374364874984e-17	1.74599782965696e-14	58.6256787698333	1.1495887543364
TGGT1_306310:E003	TGGT1_306310	E003	0.0411175110023404	6.0355540540207e-17	2.22958589831148e-14	24.1662017334761	2.87793821101201
TGGT1_294640:E002	TGGT1_294640	E002	0.00891856592451262	7.25981460621425e-17	2.66900657845782e-14	111.75316418227	0.838530149245085
TGGT1_208050:E012	TGGT1_208050	E012	0.0472046305156706	8.03548968108581e-17	2.94010914583614e-14	21.0476469840709	3.363650934055
TGGT1_301390:E027	TGGT1_301390	E027	0.0225779553072306	8.94601499557658e-17	3.25774859817591e-14	44.0403125941144	1.39775072516531
TGGT1_214180:E008	TGGT1_214180	E008	0.0168142498052171	9.28165236787146e-17	3.36402982542519e-14	193.524859531866	0.995815212493725
TGGT1_320080:E004	TGGT1_320080	E004	0.0249994401297037	9.62449560189675e-17	3.47191252846451e-14	39.7685998385262	1.58243439043954
TGGT1_259115:E030	TGGT1_259115	E030	0.00666600002801357	9.93895207985072e-17	3.56859467738079e-14	153.507434061362	0.709560760280866
TGGT1_290730:E010	TGGT1_290730	E010	0.0109695089966717	1.12148341530217e-16	4.00797307821271e-14	101.613930364216	0.888963620836838
TGGT1_207750:E016	TGGT1_207750	E016	0.00918954816854247	1.21945820397793e-16	4.33794027865981e-14	238.920127790694	0.730699282721167
TGGT1_315150:E004	TGGT1_315150	E004	0.0128801589622136	1.34769926887692e-16	4.77203542500903e-14	77.2884938243723	1.09951018952644
TGGT1_205350:E004	TGGT1_205350	E004	0.00571552490387057	1.58512357629045e-16	5.58697890969861e-14	174.761427484718	-0.632984554107842
TGGT1_240910:E033	TGGT1_240910	E033	0.0254616176843922	1.62946921325508e-16	5.7170559789443e-14	39.0457427625785	1.71676821867396
TGGT1_202160:E011	TGGT1_202160	E011	0.0128922401952662	2.21671376298371e-16	7.7070423260805e-14	77.2158728138799	1.06443668847555
TGGT1_211650:E007	TGGT1_211650	E007	0.0121729260299766	2.21103077058479e-16	7.7070423260805e-14	81.7916376687516	-1.0151307108822
TGGT1_204080:E002	TGGT1_204080	E002	0.0168533420555331	2.31638881027416e-16	8.0173138295061e-14	59.0302936853382	1.12776958263152
TGGT1_220930:E014	TGGT1_220930	E014	0.0141597510132529	2.60508626544522e-16	8.97609925461948e-14	96.5764597276069	1.01013666228684
TGGT1_206610:E003	TGGT1_206610	E003	0.0203753586893954	2.74723330283319e-16	9.42362345043722e-14	48.8091948671121	1.39932161384405
TGGT1_259115:E028	TGGT1_259115	E028	0.00405989927136705	3.16143070649166e-16	1.07962156086533e-13	427.081458283685	0.486011730608099
TGGT1_244060:E008	TGGT1_244060	E008	0.00710250443711502	3.22157164561757e-16	1.09529159528459e-13	140.467254978483	0.706222072910509
TGGT1_253170:E007	TGGT1_253170	E007	0.0302750980232684	3.36591612988113e-16	1.13932554040386e-13	32.8307179390513	1.83214654377677
TGGT1_223140:E006	TGGT1_223140	E006	0.0258265069991654	3.9744978135702e-16	1.33942319518111e-13	38.4933472914775	1.47676595034092
TGGT1_215990:E012	TGGT1_215990	E012	0.0289618006514954	4.28143469698139e-16	1.43656156249764e-13	34.3212314378628	1.82338036176321
TGGT1_286440:E005	TGGT1_286440	E005	0.03171977242077	4.51245365197737e-16	1.50749304894341e-13	31.333816359438	1.78826406346641
TGGT1_233110:E012	TGGT1_233110	E012	0.0334381239842363	4.77404076817546e-16	1.58797822729133e-13	29.7219388023116	1.85627343098713
TGGT1_316310:E002	TGGT1_316310	E002	0.0111044683802513	4.81173755685704e-16	1.59361844248373e-13	617.463045137837	0.731186258828974
TGGT1_263060:E014	TGGT1_263060	E014	0.017412838445625	5.07949262972835e-16	1.67507714674008e-13	57.1298080379639	1.21314947681671
TGGT1_286440:E007	TGGT1_286440	E007	0.0344781023479701	5.32088659281866e-16	1.74718360312995e-13	28.8245240963833	1.88152824579166
TGGT1_270150:E015	TGGT1_270150	E015	0.0146966882512141	5.95844215996071e-16	1.94820774572298e-13	67.7130440375433	1.07624762191258
TGGT1_233260:E020	TGGT1_233260	E020	0.0281747555539082	6.84609223369633e-16	2.2289541905107e-13	35.2811509530124	1.47970652141416
TGGT1_239050:E027	TGGT1_239050	E027	0.0151475045277125	7.49123281948512e-16	2.42870825380075e-13	65.6931814866762	1.06964393959765
TGGT1_219510:E008	TGGT1_219510	E008	0.00648590824796143	7.64150753115525e-16	2.46701896710662e-13	153.892525827061	0.614082566419923
TGGT1_277030:E011	TGGT1_277030	E011	0.0240162539135914	7.75649441758616e-16	2.49366427432664e-13	41.399005157773	1.47893660574268
TGGT1_278830:E032	TGGT1_278830	E032	0.0182636699844524	7.91282674534399e-16	2.53332445263332e-13	172.107420450038	1.01466897743283
TGGT1_226590:E005	TGGT1_226590	E005	0.00606617682887684	8.10847476933269e-16	2.58519035622911e-13	168.163743743754	-0.645103729783565
TGGT1_205130:E010	TGGT1_205130	E010	0.0151015758907663	8.15725954599983e-16	2.58999732122309e-13	65.8934328965069	1.06601058077969
TGGT1_221330:E013	TGGT1_221330	E013	0.0112237333691433	8.19486094650829e-16	2.59122852076896e-13	88.7301105423344	0.898761497460654
TGGT1_250010:E016	TGGT1_250010	E016	0.030883201792699	8.40846045408578e-16	2.64787244225651e-13	32.1835432435356	1.86852317080298
TGGT1_268280:E024	TGGT1_268280	E024	0.0072178901187291	9.19771764596485e-16	2.88459196229796e-13	138.210943546239	0.701075836280685
TGGT1_270520:E010	TGGT1_270520	E010	0.00254113517762943	9.73160675081179e-16	3.03962385330132e-13	396.080552000332	0.384340820282682
TGGT1_283510:E007	TGGT1_283510	E007	0.00796508080527929	1.19792482740016e-15	3.72651619283184e-13	154.723656986978	-0.708361852835583
TGGT1_299080:E010	TGGT1_299080	E010	0.0179903240814736	1.27053114664298e-15	3.93644361752446e-13	55.2924271195022	1.19057679956305
TGGT1_202790:E015	TGGT1_202790	E015	0.0312846524196193	1.42748867749609e-15	4.40497781175772e-13	31.7701016203134	1.80000950156184
TGGT1_224290:E006	TGGT1_224290	E006	0.00874555270931137	1.54928135992884e-15	4.7616852741141e-13	113.972738472097	0.802072922474402
TGGT1_290640:E023	TGGT1_290640	E023	0.0293600668712844	1.56103549426455e-15	4.77869658457392e-13	106.079319214712	1.3288774435209
TGGT1_235370:E009	TGGT1_235370	E009	0.00646130524734464	1.72648945014413e-15	5.2642170587589e-13	154.481657160246	-0.682100779054426
TGGT1_257180:E010	TGGT1_257180	E010	0.0420516776629041	1.76068674960016e-15	5.34726829166116e-13	23.628914976182	2.42079350185037
TGGT1_253170:E008	TGGT1_253170	E008	0.0295985242650737	1.88028393426611e-15	5.68800695500806e-13	33.5820507221395	1.73424895714993
TGGT1_248880:E016	TGGT1_248880	E016	0.00650470381629574	2.32167360920276e-15	6.99570333765931e-13	153.44547523613	0.656313727103795
TGGT1_223070:E011	TGGT1_223070	E011	0.00453973811818854	2.51864299192061e-15	7.55956920196108e-13	425.505387258591	0.462179343477696
TGGT1_218610:E012	TGGT1_218610	E012	0.0159171975304218	2.62247265241953e-15	7.84058098030971e-13	62.5096126988802	1.19828906823594
TGGT1_297970:E010	TGGT1_297970	E010	0.0148858281562457	2.895573394604e-15	8.62353383415456e-13	66.8506794251213	1.04999368499055
TGGT1_215610:E004	TGGT1_215610	E004	0.0113425681146102	3.00545749515972e-15	8.84790565347078e-13	87.7976574616823	0.867291874993121
TGGT1_215740:E017	TGGT1_215740	E017	0.0320682030834668	3.00293240179159e-15	8.84790565347078e-13	34.2763252542182	1.95028887659278
TGGT1_241140:E014	TGGT1_241140	E014	0.0307878639582162	2.99215281158949e-15	8.84790565347078e-13	32.283314825198	2.03241352439124
TGGT1_294350:E010	TGGT1_294350	E010	0.0543434932074025	3.03535327568189e-15	8.90181067341867e-13	18.2809536479868	3.30795277059506
TGGT1_230420:E027	TGGT1_230420	E027	0.0184202084117003	4.1163780889809e-15	1.20262411871873e-12	53.9996088530042	1.1986716531683
TGGT1_314265:E003	TGGT1_314265	E003	0.0281078035891924	4.30351297925589e-15	1.25253419237532e-12	35.3652929717095	1.3941802680028
TGGT1_217220:E013	TGGT1_217220	E013	0.00941458387032578	4.37328871384151e-15	1.26803918832242e-12	105.843652017507	0.798074454823677
TGGT1_314000:E007	TGGT1_314000	E007	0.0338803130036695	4.83462952908233e-15	1.39653544784248e-12	29.3336271228692	1.62934487300352
TGGT1_280710:E007	TGGT1_280710	E007	0.0448054947347738	5.56193280189668e-15	1.60060760561549e-12	22.1755243278511	2.33552793195464
TGGT1_219070:E037	TGGT1_219070	E037	0.00444186383722269	6.20440260979317e-15	1.77883463928611e-12	225.26510085163	-0.519689964150325
TGGT1_262490:E006	TGGT1_262490	E006	0.0081414782161512	6.52492753144786e-15	1.86377641908498e-12	122.465203911638	0.722460517591202
TGGT1_221900:E003	TGGT1_221900	E003	0.0184518459919907	8.24128067747208e-15	2.34531586449971e-12	53.9068474293747	1.13392564916229
TGGT1_218740:E004	TGGT1_218740	E004	0.00868264341451233	8.586129612913e-15	2.43443705190921e-12	114.801814098505	-0.762073905292114
TGGT1_297520:E016	TGGT1_297520	E016	0.0502579993450837	8.71193823642939e-15	2.46102646423722e-12	19.768041591651	2.62726697114058
TGGT1_224350A:E017	TGGT1_224350A	E017	0.0104104883714787	9.11639005593064e-15	2.56584638361737e-12	125.766867876789	0.828659974483323
TGGT1_271880:E015	TGGT1_271880	E015	0.0346161397577124	9.3057689121905e-15	2.60958892666417e-12	28.7094669304862	1.68218367985358
TGGT1_249630:E006	TGGT1_249630	E006	0.00746424957746929	1.02874634578854e-14	2.87439210804925e-12	133.628058862892	0.613593663842666
TGGT1_271440:E026	TGGT1_271440	E026	0.012517805292916	1.05432705282318e-14	2.93519303470199e-12	79.531956084308	0.893803199938901
TGGT1_221320:E010	TGGT1_221320	E010	0.0536660279173526	1.07683074417202e-14	2.98701963501609e-12	18.511875974924	2.86627030044131
TGGT1_213800:E009	TGGT1_213800	E009	0.0258908520710028	1.10217237346276e-14	3.04631721797691e-12	129.871144270788	1.14473250835502
TGGT1_321360:E015	TGGT1_321360	E015	0.0200446210529264	1.11775268085496e-14	3.07830690820259e-12	49.6159394876712	1.2501961868189
TGGT1_229030:E007	TGGT1_229030	E007	0.00779943779228685	1.13775882141065e-14	3.12221337716894e-12	127.859732954715	0.690773370560269
TGGT1_315580:E015	TGGT1_315580	E015	0.0147435786396606	1.18468968944787e-14	3.2394306643454e-12	67.4971844106515	-1.08661283100244
TGGT1_269990:E003	TGGT1_269990	E003	0.0143223750899153	1.34675629877015e-14	3.66952885562418e-12	69.4869906099233	1.01396213120007
TGGT1_289950:E004	TGGT1_289950	E004	0.0315729710356676	1.46495264440352e-14	3.97747584233332e-12	41.0618879490648	1.58805035572217
TGGT1_256830:E011	TGGT1_256830	E011	0.0468267410412228	1.4861740159946e-14	4.02088566433019e-12	21.2176257721184	2.41920086153542
TGGT1_233838:E002	TGGT1_233838	E002	0.0290029132452373	1.76357209481249e-14	4.75465224733711e-12	34.2725219684686	1.73595419445432
TGGT1_260340:E013	TGGT1_260340	E013	0.0198411984631761	1.78609730352821e-14	4.79854400388801e-12	50.1255153469954	1.15762530212622
TGGT1_270370:E006	TGGT1_270370	E006	0.016355601371829	1.90027791904247e-14	5.08751409287338e-12	60.8305289868946	1.03606777712474
TGGT1_295760:E039	TGGT1_295760	E039	0.0130023660013448	1.97838543235757e-14	5.27823616201592e-12	76.5601383775092	0.884125314033404
TGGT1_213920:E009	TGGT1_213920	E009	0.0125454330318855	2.08033363646473e-14	5.5310240700706e-12	79.3563263035128	0.872643905959084
TGGT1_215990:E010	TGGT1_215990	E010	0.0195974237544555	2.17447185620265e-14	5.76137565569113e-12	50.7501330351148	1.23108530919603
TGGT1_214180:E004	TGGT1_214180	E004	0.00549912370249608	2.22169529510661e-14	5.86626808900709e-12	192.219244039435	0.583585472578422
TGGT1_229140:E007	TGGT1_229140	E007	0.00707895514735475	2.74963902888205e-14	7.23541144048664e-12	140.936832188686	0.650580043318118
TGGT1_316730:E009	TGGT1_316730	E009	0.0555587461864783	2.78799294759216e-14	7.31129741003886e-12	17.8808402793057	2.63700092311056
TGGT1_275480:E014	TGGT1_275480	E014	0.0215763414644874	2.94613537832803e-14	7.69973483212895e-12	54.6472303266308	1.21082940626018
TGGT1_289570:E011	TGGT1_289570	E011	0.0134307945419463	3.2531209134125e-14	8.47322208894495e-12	74.1116547131289	-0.923086085224025
TGGT1_216970:E016	TGGT1_216970	E016	0.0176813653661489	3.43607707759031e-14	8.9195221084732e-12	56.2604801201932	1.09932980030068
TGGT1_235660:E010	TGGT1_235660	E010	0.0088819782084913	3.60709826425793e-14	9.33193970810728e-12	112.215307661265	0.701443234034965
TGGT1_295910:E008	TGGT1_295910	E008	0.0159162117129305	3.81410404124897e-14	9.83437289320293e-12	62.5134928325686	1.03734233233182
TGGT1_211420:E007	TGGT1_211420	E007	0.000126856788832292	3.93042353158424e-14	1.01003997624193e-11	22197.9553979856	-0.0300666114902582
TGGT1_253020:E017	TGGT1_253020	E017	0.0115433481128775	4.0851392712615e-14	1.0462994872864e-11	86.2659619460503	0.838030048934801
TGGT1_277510:E022	TGGT1_277510	E022	0.034398295202651	4.47041146874491e-14	1.14117277748821e-11	28.891466778647	1.50445778988617
TGGT1_312050:E009	TGGT1_312050	E009	0.00817388238800068	4.5259950533829e-14	1.15153603283703e-11	128.128662296759	0.66407860989584
TGGT1_233090:E004	TGGT1_233090	E004	0.0593172092300749	4.68140309144708e-14	1.18324003071552e-11	16.7472128518718	3.25765467990003
TGGT1_248160:E016	TGGT1_248160	E016	0.0353787945988284	4.67470965356908e-14	1.18324003071552e-11	30.6767352248039	1.73184607141461
TGGT1_227948:E011	TGGT1_227948	E011	0.0102509436231441	5.56978785990867e-14	1.40316652390755e-11	97.1788380939525	0.795109242325282
TGGT1_270830:E003	TGGT1_270830	E003	0.00637340368671197	5.73686409566427e-14	1.44053407359005e-11	274.817991726195	0.544186394908049
TGGT1_363030:E004	TGGT1_363030	E004	0.00539384739475092	6.33646197321743e-14	1.58591116819579e-11	247.150850496338	0.506707655866949
TGGT1_259010:E005	TGGT1_259010	E005	0.0338668277519935	7.55330275666899e-14	1.88432832439667e-11	29.3453192427172	1.68654039233827
TGGT1_219070:E021	TGGT1_219070	E021	0.0264786639371549	8.25019645608025e-14	2.05152215241372e-11	46.0659400583642	1.34860177807809
TGGT1_291880:E021	TGGT1_291880	E021	0.0120644628727759	8.70849195479381e-14	2.15849805267901e-11	82.5290794562055	0.833542747699758
TGGT1_208530:E016	TGGT1_208530	E016	0.0468288636333123	8.77253483735214e-14	2.16738025497629e-11	21.2166633402204	2.25563427946272
TGGT1_208050:E011	TGGT1_208050	E011	0.0528405362543776	9.86583645917122e-14	2.42968357696583e-11	18.8012634665481	2.77333221259069
TGGT1_222840:E008	TGGT1_222840	E008	0.00253985136768345	1.07772052593261e-13	2.64564894731898e-11	396.283516395632	0.368668764786051
TGGT1_263100:E017	TGGT1_263100	E017	0.014166213862281	1.08252283208759e-13	2.64897474041764e-11	70.2548516548832	0.981387554083335
TGGT1_318440:E012	TGGT1_318440	E012	0.0361296498668574	1.09089486509384e-13	2.66098694441954e-11	28.5200387820211	1.74593144057166
TGGT1_278660:E009	TGGT1_278660	E009	0.0384601558977724	1.12863112505432e-13	2.74432372644933e-11	50.2658073146933	1.55779909007051
TGGT1_220230A:E009	TGGT1_220230A	E009	0.012001815621893	1.20780706804917e-13	2.9275795485077e-11	82.9611087178473	0.863531922606762
TGGT1_217020:E031	TGGT1_217020	E031	0.00185640688242502	1.27662632739145e-13	3.08465839993009e-11	544.94173219386	-0.311963875776016
TGGT1_207750:E020	TGGT1_207750	E020	0.0240753212289392	1.28360586959267e-13	3.09180013172075e-11	41.2972893901699	1.33085252875853
TGGT1_284040:E024	TGGT1_284040	E024	0.032080517877103	1.54365100096003e-13	3.70654724877394e-11	30.9810879621816	1.60225071318814
TGGT1_289200:E018	TGGT1_289200	E018	0.0461938248938062	1.6316285301975e-13	3.90559007398085e-11	21.5085525809608	2.29254336726779
TGGT1_242720:E009	TGGT1_242720	E009	0.0106623684213314	1.65304621073163e-13	3.94456868614865e-11	93.4168536162801	0.788047374446241
TGGT1_253170:E019	TGGT1_253170	E019	0.0174973141398132	1.81823051694412e-13	4.32530582756767e-11	56.8534443931344	1.08147263680236
TGGT1_225560:E016	TGGT1_225560	E016	0.00401318625768411	1.83958155773756e-13	4.36259037505805e-11	465.591371363996	-0.43618068428691
TGGT1_315780:E011	TGGT1_315780	E011	0.00901290134835332	1.94018435933734e-13	4.58701371133549e-11	110.578978436831	0.707870258061405
TGGT1_234280:E013	TGGT1_234280	E013	0.0142064001938246	2.1076129802875e-13	4.95237487970490e-11	70.0556342172768	0.926623072858559
TGGT1_249530:E005	TGGT1_249530	E005	0.0287258361012733	2.10730851585555e-13	4.95237487970490e-11	34.6034978623739	1.53761799791904
TGGT1_242880:E009	TGGT1_242880	E009	0.0265511280877886	2.21020518418619e-13	5.17760779686934e-11	37.4414368863536	1.38023149896906
TGGT1_267510:E006	TGGT1_267510	E006	0.011368839222018	2.70130231430304e-13	6.3088135539241e-11	87.594156699037	0.784221024973309
TGGT1_255670:E006	TGGT1_255670	E006	0.00441551177092417	2.71897252978622e-13	6.33083915973283e-11	226.620092434512	0.435483632564841
TGGT1_224220:E022	TGGT1_224220	E022	0.0230571607772063	2.84334919075007e-13	6.60043570301097e-11	43.1236339634211	1.23127445965899
TGGT1_320450:E005	TGGT1_320450	E005	0.0308428580917476	2.94661721036993e-13	6.81955501786729e-11	32.2256877899274	1.48141684393615
TGGT1_259710:E012	TGGT1_259710	E012	0.0290177124087337	3.16268871652086e-13	7.29764303036978e-11	34.255022007536	1.34250963787052
TGGT1_291310:E002	TGGT1_291310	E002	0.0175779420319355	3.31810031817259e-13	7.63331958525232e-11	56.5921513255879	1.03481673543775
TGGT1_209040:E006	TGGT1_209040	E006	0.0155557007020918	3.89704910901064e-13	8.91183221395983e-11	63.9654963536573	0.880096811607194
TGGT1_216250:E013	TGGT1_216250	E013	0.055940962640437	3.8959510311972e-13	8.91183221395983e-11	17.7585940480472	2.72955618764363
TGGT1_205330:E002	TGGT1_205330	E002	0.00867941082022944	4.2673819621659e-13	9.72975750228312e-11	178.758582469181	-0.652487472682487
TGGT1_214790:E002	TGGT1_214790	E002	0.00596071100614542	4.31823002714441e-13	9.81656333123357e-11	217.27476263065	-0.534673834099137
TGGT1_232290:E001	TGGT1_232290	E001	0.00920268426446991	4.36646654262025e-13	9.89693775030419e-11	161.580314957544	-0.460004166160365
TGGT1_209250:E004	TGGT1_209250	E004	0.0138151441228923	4.65648174339357e-13	1.05232378740333e-10	358.612523611624	0.741875798788533
TGGT1_220610:E007	TGGT1_220610	E007	0.0195374001572868	4.79682011088945e-13	1.08086002011851e-10	50.9063256702726	1.15420615424109
TGGT1_410760:E005	TGGT1_410760	E005	0.0184590653108819	4.84493155850514e-13	1.08850878994403e-10	53.8857250184514	0.938868889726486
TGGT1_203540:E016	TGGT1_203540	E016	0.00212396587407312	5.2223477861251e-13	1.16988203161077e-10	475.160372252319	-0.318853153406474
TGGT1_308860:E007	TGGT1_308860	E007	0.0149660023760278	5.91044029075178e-13	1.32017587389679e-10	143.609499707808	0.832185555491988
TGGT1_319950:E010	TGGT1_319950	E010	0.0261490374394061	6.00074480218303e-13	1.33646153149373e-10	66.3665450415756	1.15796008413003
TGGT1_276970:E004	TGGT1_276970	E004	0.0315495942784756	6.35261413065025e-13	1.41073934091553e-10	31.5030157518898	1.41906729089834
TGGT1_217020:E006	TGGT1_217020	E006	0.00893372747396323	6.53888194277314e-13	1.44791951538e-10	161.228406493333	0.654495626615866
TGGT1_285210:E007	TGGT1_285210	E007	0.0277252440583234	6.7032888050448e-13	1.48005920090008e-10	35.8538801267454	1.51680523751928
TGGT1_203390:E005	TGGT1_203390	E005	0.0201350279607993	6.75520208192647e-13	1.4872477431776e-10	49.3927797205655	1.08588753898259
TGGT1_264610:E011	TGGT1_264610	E011	0.0470825500795043	6.85105511054476e-13	1.50404149008265e-10	31.8239750672607	1.76187044814431
TGGT1_266910:E001	TGGT1_266910	E001	0.00435127051196499	6.87509608748564e-13	1.50501925377246e-10	229.992623506323	0.398002781537554
TGGT1_202360:E011	TGGT1_202360	E011	0.0259692320974874	7.0304035711882e-13	1.53464522499826e-10	38.2815088985841	1.37701177952129
TGGT1_205580:E006	TGGT1_205580	E006	0.0724686999989828	7.93343673640978e-13	1.72198157772745e-10	59.6649495879391	1.89210327428058
TGGT1_269050:E014	TGGT1_269050	E014	0.0457137449216928	7.92421550617811e-13	1.72198157772745e-10	21.7346034029468	1.714053212848
TGGT1_258980:E007	TGGT1_258980	E007	0.0294767416074256	8.01222172792697e-13	1.73418332650345e-10	38.7400427380311	1.35391644482306
TGGT1_214620:E036	TGGT1_214620	E036	0.0194148526237944	8.131132543626e-13	1.75497705408593e-10	51.2282213890269	1.0594158274615
TGGT1_363030:E005	TGGT1_363030	E005	0.00620599984475065	8.40594914598504e-13	1.809209844622e-10	189.66440789763	0.532215845613682
TGGT1_256820:E003	TGGT1_256820	E003	0.0236682508681639	8.74448976085603e-13	1.87681664736004e-10	42.0085992459052	1.23699289070227
TGGT1_220930:E016	TGGT1_220930	E016	0.0120951407050062	9.266385544063e-13	1.98329043467735e-10	82.319155418219	0.826763309437073
TGGT1_200290:E007	TGGT1_200290	E007	0.00594049886698129	9.34513053252862e-13	1.99458831868862e-10	168.104309028244	-0.564043992042832
TGGT1_268260:E004	TGGT1_268260	E004	0.0149449644301123	9.63355995263259e-13	2.05045386725881e-10	66.5855430437636	0.93171733036449
TGGT1_261022:E061	TGGT1_261022	E061	0.0125246485187502	9.80572371200869e-13	2.08133257696025e-10	111.061647535725	0.798659033453912
TGGT1_207990:E012	TGGT1_207990	E012	0.0437516954241053	9.83753984863163e-13	2.08233346928184e-10	22.7100637721514	2.05404046907717
TGGT1_263570:E012	TGGT1_263570	E012	0.00927954158811531	9.88966512869273e-13	2.08761593267408e-10	107.389713879239	0.703273239642771
TGGT1_244100:E016	TGGT1_244100	E016	0.0354235915512738	9.93027143185274e-13	2.09044456440896e-10	28.054419694181	1.61366303330484
TGGT1_211850:E005	TGGT1_211850	E005	0.00898855132007731	1.01374932031693e-12	2.12823651708175e-10	419.821422842282	0.544916528049828
TGGT1_269425:E005	TGGT1_269425	E005	0.00402507019278185	1.16550514778491e-12	2.44016128175338e-10	248.792976399089	0.40893240645897
TGGT1_224290:E007	TGGT1_224290	E007	0.0138496654722576	1.17289359880777e-12	2.4489572133585e-10	71.8646115721082	0.924389881064993
TGGT1_225130:E003	TGGT1_225130	E003	0.0412067369241843	1.18378872496161e-12	2.46500743251695e-10	24.1138302066538	1.75617022764767
TGGT1_232150:E023	TGGT1_232150	E023	0.0465853227496289	1.22469288714308e-12	2.53643469998417e-10	68.1183622309311	1.50687971533559
TGGT1_314970:E011	TGGT1_314970	E011	0.0588530152827124	1.22166153146146e-12	2.53643469998417e-10	16.879381405298	2.71916139401179
No_genes_on_ref_contig_268+No_genes_on_ref_contig_269+No_genes_on_ref_contig_272+No_genes_on_ref_contig_271+No_genes_on_ref_contig_270:E005	No_genes_on_ref_contig_268+No_genes_on_ref_contig_269+No_genes_on_ref_contig_272+No_genes_on_ref_contig_271+No_genes_on_ref_contig_270	E005	0.00328654575712534	1.26908511402898e-12	2.62130894910335e-10	305.293127581254	-0.408870575843615
TGGT1_300200:E004	TGGT1_300200	E004	0.00298275948150617	1.31859182180391e-12	2.71626380192887e-10	336.750546302852	-0.396505618363196
TGGT1_236820:E006	TGGT1_236820	E006	0.029682354786473	1.35555458501031e-12	2.78493977669618e-10	33.487096022426	1.37530801780073
TGGT1_312840:E015	TGGT1_312840	E015	0.0468225155164494	1.51377169657941e-12	3.10169802266858e-10	21.2195419818421	1.85447409968898
TGGT1_266400:E004	TGGT1_266400	E004	0.0133003243676246	1.7424310970218e-12	3.56072282451766e-10	74.8405486063399	0.863380601512454
TGGT1_256780:E004	TGGT1_256780	E004	0.011822254858565	1.78267995923465e-12	3.63330981505869e-10	130.293881233	-0.706608896561318
TGGT1_220212:E006	TGGT1_220212	E006	0.0488037805949307	1.93122739898702e-12	3.92565395915253e-10	20.3574919757691	2.55941770858047
TGGT1_229030:E016	TGGT1_229030	E016	0.0120490040138993	2.20631571878157e-12	4.47299949562057e-10	108.250137831528	0.754296588273231
TGGT1_263740:E002	TGGT1_263740	E002	0.00432595571225422	2.23671476631713e-12	4.52269611840814e-10	231.349331074378	0.454506820938166
TGGT1_236250:E003	TGGT1_236250	E003	0.0187296504272329	2.37034406793888e-12	4.78031829785353e-10	53.1058064860447	1.12073538645544
TGGT1_248640:E006	TGGT1_248640	E006	0.0664406076221518	2.54795268561129e-12	5.12505341634331e-10	14.9507348260978	2.77592935582696
TGGT1_295760:E036	TGGT1_295760	E036	0.0680823414468532	2.57030651908626e-12	5.1565180680687e-10	14.590030718742	2.4396215818048
TGGT1_320300:E021	TGGT1_320300	E021	0.0169571001299555	2.79967443506229e-12	5.60204647309587e-10	58.6683588510378	-0.928260382146659
TGGT1_363030:E006	TGGT1_363030	E006	0.00525118610911507	3.37016064391665e-12	6.72605281549671e-10	307.29011155356	0.447323530803438
TGGT1_244290:E027	TGGT1_244290	E027	0.0183112664121583	4.06859810494948e-12	8.09893452305707e-10	54.6783267397093	-1.02953477643334
TGGT1_230690:E008	TGGT1_230690	E008	0.0259474415768368	4.13282486233113e-12	8.20552620017925e-10	38.3137003345318	1.25977958944852
TGGT1_207430:E043	TGGT1_207430	E043	0.0127508314070196	4.40351445368977e-12	8.72043402263302e-10	78.0745343018941	0.81697215081465
TGGT1_260500:E005	TGGT1_260500	E005	0.0069349109336184	4.73119279932261e-12	9.34526121135093e-10	143.878860926356	-0.604374994537016
TGGT1_290870:E008	TGGT1_290870	E008	0.0120526792082236	4.9403270126306e-12	9.73333094024353e-10	82.6099982837623	-0.780306659316108
TGGT1_220230A:E013	TGGT1_220230A	E013	0.0218052020270282	4.96477183201575e-12	9.75647501935024e-10	45.6035297232598	1.17849938208668
TGGT1_310100:E027	TGGT1_310100	E027	0.0497367245643699	4.98593400093322e-12	9.77306660279862e-10	19.9753680587523	2.58174321439939
TGGT1_224350A:E002	TGGT1_224350A	E002	0.0204609171295243	5.022628877351e-12	9.81994236765952e-10	171.168466213689	0.933021939005785
TGGT1_282055:E009	TGGT1_282055	E009	0.00449600115369392	5.17701136112707e-12	1.00960919277899e-09	222.531645314309	-0.49392786502599
TGGT1_277760:E002	TGGT1_277760	E002	0.0176568828585724	5.78361474781721e-12	1.12505216804565e-09	56.3386420553342	0.992980446778804
TGGT1_230190:E011	TGGT1_230190	E011	0.102460836796134	5.83673548855015e-12	1.13251829478214e-09	29.8587759042787	2.54099880539034
TGGT1_242030:E003	TGGT1_242030	E003	0.0335750325945357	6.58709752882891e-12	1.27489373506959e-09	29.6006171656282	1.52518264115761
TGGT1_257470:E006	TGGT1_257470	E006	0.0486141022004282	6.78782391621439e-12	1.30722605086128e-09	20.4369775657454	1.99142624805297
TGGT1_292190:E010	TGGT1_292190	E010	0.0124693087371319	6.78817749643598e-12	1.30722605086128e-09	79.8421364519218	0.784588931702214
TGGT1_217740:E004	TGGT1_217740	E004	0.0280066442111113	7.03661564350051e-12	1.35168109049912e-09	50.8514325296844	1.19131438457407
TGGT1_206695:E002	TGGT1_206695	E002	0.00866442430074858	7.64582955774835e-12	1.46504390456037e-09	115.044179289345	-0.610045752581442
TGGT1_228330:E019	TGGT1_228330	E019	0.051655258076227	8.13166406359435e-12	1.55426037724975e-09	19.2329645634933	2.06331577712823
TGGT1_222350:E001	TGGT1_222350	E001	0.00112226567723626	8.39845744071497e-12	1.60127115228838e-09	921.293715637505	-0.177123407607952
TGGT1_210380:E015	TGGT1_210380	E015	0.00663934497660936	8.53376844497937e-12	1.62304249011604e-09	150.317445198968	-0.579922108122988
TGGT1_213920:E007	TGGT1_213920	E007	0.0147791995751664	8.58698184024418e-12	1.62913067570084e-09	67.334121281692	0.847907557873395
TGGT1_217020:E010	TGGT1_217020	E010	0.00985312324023096	8.69266721689779e-12	1.64511938656349e-09	101.116235233533	0.694624496553435
TGGT1_277530:E011	TGGT1_277530	E011	0.0276967553315143	8.95351663906483e-12	1.69032274691849e-09	35.8908052540904	1.36389746633254
TGGT1_263100:E014	TGGT1_263100	E014	0.00627410150334886	9.09713657323854e-12	1.71322716391649e-09	159.116513753683	0.556965953038595
TGGT1_268260:E006	TGGT1_268260	E006	0.0302897510461402	9.756670129834e-12	1.83294196275319e-09	32.8148175702281	1.4372724099016
TGGT1_225120:E014	TGGT1_225120	E014	0.000848788095641854	1.02040442394416e-11	1.9123125542097e-09	1219.28543637599	0.174279322040978
TGGT1_229780:E006	TGGT1_229780	E006	0.0207054819828285	1.04180302095246e-11	1.94766468907358e-09	48.0296928931332	1.04050795262109
TGGT1_222440:E002	TGGT1_222440	E002	0.0316845316281316	1.05684053494434e-11	1.96620959282127e-09	31.3687050885475	-1.35991421988753
TGGT1_316600:E004	TGGT1_316600	E004	0.00504673165632668	1.05617074020804e-11	1.96620959282127e-09	198.080348483749	0.452842945596099
TGGT1_278630:E007	TGGT1_278630	E007	0.0150685858008323	1.09215421402862e-11	2.02700128848591e-09	66.0380265784329	1.15449577410734
TGGT1_207760:E007	TGGT1_207760	E007	0.0414934856407378	1.12099458614999e-11	2.07551472327728e-09	28.5145355372541	1.6475016404971
TGGT1_321630:E018	TGGT1_321630	E018	0.0103793788058522	1.15946129616611e-11	2.1415751830172e-09	137.082865423549	0.657999999952355
TGGT1_208050:E010	TGGT1_208050	E010	0.0619701208007373	1.25469183929718e-11	2.31191263443831e-09	16.0298729470828	2.6604356049307
TGGT1_321540:E003	TGGT1_321540	E003	0.01442145184696	1.3272246840094e-11	2.43971203457489e-09	69.0084627407015	0.855821765412619
TGGT1_242880:E010	TGGT1_242880	E010	0.0399666273013831	1.62019699444178e-11	2.97114740959244e-09	24.8626961762986	1.6710561960582
TGGT1_243730:E004	TGGT1_243730	E004	0.00554860611617207	1.70435078346681e-11	3.11802859879141e-09	180.051694778541	-0.521930999161209
TGGT1_277840:E009	TGGT1_277840	E009	0.0276293016929724	1.7151755538447e-11	3.13037871807043e-09	80.5896397189549	1.0711047490255
TGGT1_228460:E012	TGGT1_228460	E012	0.029098105728401	1.76180806496789e-11	3.20786839544876e-09	34.160268545699	1.3226876296168
TGGT1_253360:E012	TGGT1_253360	E012	0.0356483411336823	1.80171223931812e-11	3.2727698187349e-09	27.8773755099979	1.4781603855033
TGGT1_408710:E003	TGGT1_408710	E003	0.00364435264220609	1.90262718264548e-11	3.44792841587101e-09	275.032411887293	0.380976096881262
TGGT1_310100:E021	TGGT1_310100	E021	0.0529586047585821	1.94726134116916e-11	3.52051105109211e-09	18.7593196662224	2.53607473039427
TGGT1_247420:E003	TGGT1_247420	E003	0.0269538769531298	2.02732019393714e-11	3.65664792820535e-09	36.8812638193822	-1.18319535953358
TGGT1_268580:E017	TGGT1_268580	E017	0.0117976609063987	2.06787456150968e-11	3.72106036727679e-09	84.4009374307808	0.722182467836905
TGGT1_285480:E009	TGGT1_285480	E009	0.0418382590562246	2.07618476780639e-11	3.72728525710139e-09	23.7495465457174	-1.65347588385593
TGGT1_263000:E013	TGGT1_263000	E013	0.0136193697026693	2.1110962212899e-11	3.7811258824068e-09	73.0828894240262	0.817729106351458
TGGT1_225150:E020	TGGT1_225150	E020	0.00660623868718654	2.18323950798122e-11	3.90124590871518e-09	185.330879575576	-0.552689021063817
TGGT1_206550:E036	TGGT1_206550	E036	0.0146841021460942	2.19731593076385e-11	3.91728919192813e-09	67.7712193318096	1.06434304519665
TGGT1_222800:E028	TGGT1_222800	E028	0.0576896177729096	2.44636148374711e-11	4.35118234552493e-09	17.2199832356011	2.38261737895168
TGGT1_220500:E013	TGGT1_220500	E013	0.0183010659644204	2.46856026354911e-11	4.38052574989198e-09	54.351818140383	0.979979663848036
TGGT1_293540:E002	TGGT1_293540	E002	0.0196860127285582	2.53769601945777e-11	4.492832927352e-09	50.5213512670564	0.969598808507424
TGGT1_217020:E001	TGGT1_217020	E001	0.011452547862897	2.55825277252238e-11	4.51881536281154e-09	86.9519800651943	0.735648057587504
TGGT1_291350:E019	TGGT1_291350	E019	0.0408261632195557	2.57303365169483e-11	4.53449969484577e-09	24.3388049804882	1.78730605576893
TGGT1_207750:E013	TGGT1_207750	E013	0.00462624764897875	2.5889662671447e-11	4.5521373242242e-09	216.219425266974	0.466104220986345
TGGT1_244270:E002	TGGT1_244270	E002	0.0306344279897591	2.69806858687077e-11	4.73313917829656e-09	32.4451918610976	1.33160028361712
TGGT1_250220:E006	TGGT1_250220	E006	0.00390553328336172	2.81626938444123e-11	4.92746479352791e-09	1050.01731574594	0.339861778071227
TGGT1_260200:E002	TGGT1_260200	E002	0.0129062353650019	2.82808018785977e-11	4.92746479352791e-09	77.1319174440053	0.769050955152837
TGGT1_263430:E009	TGGT1_263430	E009	0.0357909791555053	2.82661172518548e-11	4.92746479352791e-09	27.7661683521563	1.38779226007015
TGGT1_283780:E017	TGGT1_283780	E017	0.0132807780848155	2.9557301239379e-11	5.13822252337141e-09	74.9509839471438	0.779153225068429
TGGT1_242010:E003	TGGT1_242010	E003	0.0468668265375522	2.97558029694257e-11	5.16105334709201e-09	21.199464822879	1.95121147848346
TGGT1_318650:E010	TGGT1_318650	E010	0.00409562983154407	3.00408625871765e-11	5.19876071759207e-09	289.244819817251	0.406731860082743
TGGT1_236650:E006	TGGT1_236650	E006	0.0019218920645355	3.07142027479531e-11	5.30334201470668e-09	2109.7350646182	0.250116964674812
TGGT1_286920:E006	TGGT1_286920	E006	0.00287892624804978	3.22263112842576e-11	5.55195757880829e-09	349.043429386265	0.343574137943688
TGGT1_300200:E002	TGGT1_300200	E002	0.00737860206106613	3.48394513227022e-11	5.98872241897645e-09	408.938498540569	-0.508459113538854
TGGT1_200290:E010	TGGT1_200290	E010	0.0227258632970344	3.49426821389817e-11	5.9930599721271e-09	43.7532464952239	-1.1719346927873
TGGT1_206550:E031	TGGT1_206550	E031	0.0152236989037029	3.87592295894249e-11	6.63283501996134e-09	65.3636407994573	1.08194962208804
TGGT1_275990:E015	TGGT1_275990	E015	0.0161677860988979	3.92788529171011e-11	6.7068204924251e-09	61.5386872434564	0.882636626949341
TGGT1_217760:E015	TGGT1_217760	E015	0.0108070376702849	4.0854771645737e-11	6.94721054145245e-09	92.1623138591459	0.706071190739905
TGGT1_263320:E005	TGGT1_263320	E005	0.00212034055864238	4.08675399187437e-11	6.94721054145245e-09	1889.60039126068	-0.130118189292609
TGGT1_265010:E007	TGGT1_265010	E007	0.0230528626647782	4.15080289386594e-11	7.04051306746086e-09	43.1316862487678	1.04879066260858
TGGT1_230190:E010	TGGT1_230190	E010	0.0678181877473866	4.24574621277359e-11	7.18569166852169e-09	18.4310444080799	2.18440394858083
TGGT1_217020:E012	TGGT1_217020	E012	0.0135946161097556	4.30553147998534e-11	7.27085983137657e-09	73.2163003290743	0.791478863638684
TGGT1_266400:E017	TGGT1_266400	E017	0.0465618356881175	4.46881138411109e-11	7.53004518247684e-09	21.3384292852397	1.88599883175074
TGGT1_203380:E023	TGGT1_203380	E023	0.0121403833342403	4.56255384257738e-11	7.67118051645772e-09	82.0115080980697	0.770724549300931
TGGT1_310950:E008	TGGT1_310950	E008	0.016435619340554	4.57623592626463e-11	7.6773851499213e-09	60.5337478625677	0.894374786439324
TGGT1_206540:E014	TGGT1_206540	E014	0.00606489283051651	4.69845315485385e-11	7.86525152635087e-09	238.021249382959	0.499552725249172
TGGT1_233430:E002	TGGT1_233430	E002	0.0240667568574834	4.83049729071445e-11	8.06871565927449e-09	73.7206248488376	1.01369072919116
TGGT1_228070:E034	TGGT1_228070	E034	0.06769786591162	4.97407608558042e-11	8.2905224335736e-09	14.6729339533872	2.63289661727215
TGGT1_207750:E017	TGGT1_207750	E017	0.0122128064733386	5.12088996741046e-11	8.50149209159741e-09	81.5237930925179	0.771437414516859
TGGT1_316730:E053	TGGT1_316730	E053	0.0226649798267928	5.12278048129104e-11	8.50149209159741e-09	43.8709573164551	1.06801485134537
TGGT1_244710:E002	TGGT1_244710	E002	0.00292935082044257	5.43175382605039e-11	8.99482044681538e-09	342.963490991028	0.222525722600974
TGGT1_270900:E026	TGGT1_270900	E026	0.0146508773830084	5.61857719010924e-11	9.28418528078331e-09	67.925271626856	0.81951556252618
TGGT1_269480:E010	TGGT1_269480	E010	0.0731789942475826	5.64026657988971e-11	9.30002496135163e-09	13.5734081198587	2.47573367664846
TGGT1_262490:E002	TGGT1_262490	E002	0.0227291684879874	5.72090619807732e-11	9.41278949768024e-09	128.418072575698	0.902685041466508
TGGT1_283730:E016	TGGT1_283730	E016	0.0212683265706346	5.76878472490658e-11	9.47128444247109e-09	46.7565693793544	1.01580099200268
TGGT1_225560:E013	TGGT1_225560	E013	0.0012147724027211	5.80138301780328e-11	9.50449609677934e-09	841.195938592167	0.218079048114926
TGGT1_305140:E012	TGGT1_305140	E012	0.0303787843992926	5.93939763369815e-11	9.70990416979712e-09	32.7185353326197	1.2747946490637
TGGT1_257300:E010	TGGT1_257300	E010	0.0144122075369999	6.10254286014688e-11	9.95543706465193e-09	69.0528325893029	0.799560983695449
TGGT1_304650:E011	TGGT1_304650	E011	0.0313353670030922	6.26127114037462e-11	1.01927392079018e-08	31.7186267288444	1.47138392763931
TGGT1_224350A:E007	TGGT1_224350A	E007	0.0156877869643435	6.93893735231985e-11	1.12720323327738e-08	63.4257390125001	0.915316313620445
TGGT1_267620:E025	TGGT1_267620	E025	0.0486598981539859	7.09234024417976e-11	1.14969229397055e-08	22.6212681395279	1.69729758235116
TGGT1_208200:E009	TGGT1_208200	E009	0.0517778419198657	7.15527963196328e-11	1.15745309701297e-08	19.1874002116413	1.86929972192329
TGGT1_255215:E001	TGGT1_255215	E001	0.0118839384280023	7.22538445004627e-11	1.16633795165589e-08	83.7864003955484	-0.730544887926233
TGGT1_266280:E022	TGGT1_266280	E022	0.0496499877149411	7.67146935640179e-11	1.23574987617997e-08	20.0102886334974	2.02139914535576
TGGT1_236160:E006	TGGT1_236160	E006	0.0109933349699003	7.91928861878151e-11	1.27300079414501e-08	90.6045988072183	0.705519642000055
TGGT1_257300:E021	TGGT1_257300	E021	0.0147136794664879	7.96441663521355e-11	1.27758221503111e-08	67.6346657582099	0.798477015922306
TGGT1_242790B:E023	TGGT1_242790B	E023	0.0407414824395789	8.0137152211695e-11	1.28281215926875e-08	24.3894358577126	1.47011422829588
TGGT1_209040:E007	TGGT1_209040	E007	0.0203009893841383	8.31025787348647e-11	1.32751618342012e-08	76.884077853832	0.791153523980015
TGGT1_221330:E006	TGGT1_221330	E006	0.00297496595208901	8.71234966383698e-11	1.3888606039839e-08	340.775282214407	-0.349556260739333
TGGT1_295910:E007	TGGT1_295910	E007	0.0176619525361809	8.7709155778015e-11	1.39530194669055e-08	58.9304628043249	0.921631265783191
TGGT1_211440:E015	TGGT1_211440	E015	0.0207401577078795	8.81429028062229e-11	1.3993050047359e-08	47.9492575638396	1.047491992404
TGGT1_297150:E005	TGGT1_297150	E005	0.0149551314798879	8.92120724739475e-11	1.41335835313004e-08	66.5401709934496	-0.851434953019263
TGGT1_311920:E021	TGGT1_311920	E021	0.0326164312390721	9.00242477718553e-11	1.42329076667614e-08	30.471505170054	1.38551179301379
TGGT1_214240:E006	TGGT1_214240	E006	0.0348053742693915	9.50387377866183e-11	1.49948490663458e-08	28.5532204771581	1.56751307803732
TGGT1_300290:E006	TGGT1_300290	E006	0.0085940959520517	9.73604289369885e-11	1.53296788488348e-08	115.989421373604	-0.56445601258138
TGGT1_214620:E035	TGGT1_214620	E035	0.0195704682008657	9.93470368183631e-11	1.56104872556494e-08	50.8201577010276	0.937129067464563
TGGT1_239820:E018	TGGT1_239820	E018	0.0016951903902933	1.03389630789813e-10	1.62125491040752e-08	597.84436310052	0.258326471154502
TGGT1_246080:E003	TGGT1_246080	E003	0.0180991414274585	1.06572703643719e-10	1.6677651384669e-08	54.9593574951943	0.908887590867642
TGGT1_220212:E007	TGGT1_220212	E007	0.0565011534452461	1.08138927001281e-10	1.68601185274254e-08	17.5824156347355	2.45600430263658
TGGT1_314900:E025	TGGT1_314900	E025	0.0137675856263714	1.08177550321079e-10	1.68601185274254e-08	72.2941324334541	0.785268676537026
TGGT1_314970:E013	TGGT1_314970	E013	0.0512782276087067	1.11453071001301e-10	1.73354648107834e-08	28.4814223621234	1.69706015831403
TGGT1_314430:E017	TGGT1_314430	E017	0.0282436385214347	1.12940981792038e-10	1.75314065009188e-08	116.031405029011	0.981427252623814
TGGT1_207990:E010	TGGT1_207990	E010	0.0250082495846435	1.19152522650703e-10	1.84583112558711e-08	39.7545715072638	1.15014861722113
TGGT1_307770:E001	TGGT1_307770	E001	0.00290556852347463	1.20980138556985e-10	1.87037241575513e-08	345.80442952576	-0.285324737512527
TGGT1_237230:E004	TGGT1_237230	E004	0.00886581825455804	1.21507533850218e-10	1.87475389125486e-08	112.420644982555	-0.642084995839438
TGGT1_297510:E001	TGGT1_297510	E001	0.0142535662391728	1.31856399230929e-10	2.03035073100339e-08	69.8232523675181	0.777252613170025
TGGT1_301460:E002	TGGT1_301460	E002	0.0223834129393063	1.32333972574491e-10	2.03362909014124e-08	44.4236742418628	1.00414151035609
TGGT1_214170:E017	TGGT1_214170	E017	0.048400225346461	1.32956040022681e-10	2.03911042858737e-08	20.5273514544756	1.81104459256312
TGGT1_257390:E008	TGGT1_257390	E008	0.0301092239771326	1.33917605221129e-10	2.04936170201111e-08	33.0117925338889	1.48825781951832
TGGT1_278870:E006	TGGT1_278870	E006	0.0111328228110247	1.34157884367113e-10	2.04936170201111e-08	89.4569340289311	-0.71539051974324
TGGT1_310100:E022	TGGT1_310100	E022	0.0489750834149376	1.49344296931053e-10	2.27681899668478e-08	20.2862362349017	2.0825516400616
TGGT1_234280:E011	TGGT1_234280	E011	0.0144465898466534	1.52272034098029e-10	2.31685668989907e-08	68.8880959040345	0.797506237125809
TGGT1_297970:E001	TGGT1_297970	E001	0.0505799812391102	1.56504417730771e-10	2.3765474199959e-08	19.6421162981842	1.96251295030576
TGGT1_300250:E003	TGGT1_300250	E003	0.0444151901517529	1.60074581548302e-10	2.42596659219465e-08	24.2049337445829	1.56197915025448
TGGT1_294280:E010	TGGT1_294280	E010	0.0661956586078098	1.62823930778509e-10	2.46277605693471e-08	15.0060870779736	2.2507450258654
TGGT1_211700:E013	TGGT1_211700	E013	0.00767034070878144	1.68925490255681e-10	2.55004477304042e-08	130.021429645413	-0.551041011602428
TGGT1_321440:E002	TGGT1_321440	E002	0.0100379092343158	1.74239609716436e-10	2.62510762583957e-08	99.2483810473629	0.661196312617671
TGGT1_310620:E012	TGGT1_310620	E012	0.0234181166785541	1.88301526082665e-10	2.83141376900465e-08	53.4501014233682	0.971412063821739
TGGT1_316730:E027	TGGT1_316730	E027	0.0497906825586945	1.89463913519172e-10	2.84332787560012e-08	19.9537057994769	1.72407043544637
TGGT1_285990:E014	TGGT1_285990	E014	0.0639702555821463	1.93244163381858e-10	2.89440580541361e-08	15.5284020812304	2.20352138083991
TGGT1_214170:E012	TGGT1_214170	E012	0.0339245590139284	1.95116349526788e-10	2.91676166314977e-08	44.3793642331255	1.20356654816471
TGGT1_289570:E020	TGGT1_289570	E020	0.0195068332193052	2.05068457347656e-10	3.0595815645091e-08	50.9862366105892	0.995144536997939
TGGT1_220500:E014	TGGT1_220500	E014	0.0213874069581243	2.07603367077155e-10	3.08209189872601e-08	116.777451243426	0.871713609639142
TGGT1_227780:E022	TGGT1_227780	E022	0.0537994488010649	2.07780574923549e-10	3.08209189872601e-08	18.4659376446091	1.84932291816609
TGGT1_311920:E019	TGGT1_311920	E019	0.0279766570081136	2.07023243758989e-10	3.08209189872601e-08	93.0526551344267	1.00302747295868
TGGT1_297520:E018	TGGT1_297520	E018	0.03352048936686	2.09954717348458e-10	3.10834115932629e-08	34.6962463689989	1.27644693271598
TGGT1_271350:E010	TGGT1_271350	E010	0.0501353059215408	2.16590371022433e-10	3.20041429581743e-08	23.7269785474629	1.71498236461997
TGGT1_254070:E002	TGGT1_254070	E002	0.00192952052176836	2.19361704754806e-10	3.23514305340595e-08	589.543590420604	0.151371175218658
TGGT1_233260:E026	TGGT1_233260	E026	0.0233563238898521	2.32178560065444e-10	3.41760613405145e-08	42.5704604989192	0.994531269298758
TGGT1_219630:E008	TGGT1_219630	E008	0.0248229420703167	2.39786672734404e-10	3.52284676345954e-08	111.947683492209	0.933638534350535
TGGT1_242880:E011	TGGT1_242880	E011	0.041339005614693	2.49606794935397e-10	3.65314996237164e-08	24.0366108672805	1.57210696110637
TGGT1_261030:E007	TGGT1_261030	E007	0.011443788809018	2.49275153990012e-10	3.65314996237164e-08	87.0187343324164	0.660159496135196
TGGT1_289320:E017	TGGT1_289320	E017	0.0333193166004768	2.50524195910924e-10	3.65960601543872e-08	264.233876610801	1.00407949569276
TGGT1_304650:E015	TGGT1_304650	E015	0.0240449215671964	2.5478724271058e-10	3.71481733741041e-08	41.349576056859	1.15351627646398
TGGT1_229030:E005	TGGT1_229030	E005	0.0106854276244104	2.59736411577576e-10	3.77980429098224e-08	93.2146061473058	0.666298107053822
TGGT1_226850:E019	TGGT1_226850	E019	0.0178495753212216	2.60740284731483e-10	3.78724031340509e-08	55.7292678923925	0.929932675621313
TGGT1_294700:E012	TGGT1_294700	E012	0.012447846168219	2.70993068606202e-10	3.92873479481032e-08	79.9801830926201	0.722378984808536
TGGT1_240755:E002	TGGT1_240755	E002	0.00629612895113439	2.80952546327021e-10	4.05781030115213e-08	158.55676413556	0.39453312043581
TGGT1_297180:E010	TGGT1_297180	E010	0.0165440363893314	2.80452430074134e-10	4.05781030115213e-08	204.091071581526	0.701034899333028
TGGT1_257390:E011	TGGT1_257390	E011	0.0158979777470061	2.8222380411774e-10	4.06852353414537e-08	62.5853478618999	0.909874924131497
TGGT1_257300:E020	TGGT1_257300	E020	0.0161647451265068	2.83090573423146e-10	4.07337647754949e-08	61.5502889104925	0.816677175079658
TGGT1_236960:E013	TGGT1_236960	E013	0.00683709200043116	2.86086899399598e-10	4.10879609143307e-08	145.947796911171	-0.551305970971839
TGGT1_217020:E005	TGGT1_217020	E005	0.0224458204133645	2.93324174922097e-10	4.20487866203156e-08	63.3734427741053	0.924129550426017
TGGT1_222360:E017	TGGT1_222360	E017	0.0141534198409029	3.01867848697947e-10	4.31929606897657e-08	76.8446590226862	0.754709612639152
TGGT1_268280:E026	TGGT1_268280	E026	0.00625649929238143	3.05878304382373e-10	4.36854484643651e-08	159.566660618372	0.501127840864082
TGGT1_228990:E036	TGGT1_228990	E036	0.00286395150135836	3.37427819421773e-10	4.81019320239531e-08	451.849591621035	-0.216611903529347
TGGT1_300290:E002	TGGT1_300290	E002	0.00250760564075901	3.42769632456711e-10	4.87729449056969e-08	401.45053249577	0.221994390615822
TGGT1_305200:E013	TGGT1_305200	E013	0.108183623245215	3.58039617699879e-10	5.08515528746869e-08	9.18010183255605	13.8248423023307
TGGT1_310290:E006	TGGT1_310290	E006	0.0211176967534886	3.67291653082848e-10	5.20693519334442e-08	47.0906241132624	1.08990802486389
TGGT1_204050:E014	TGGT1_204050	E014	0.00608997072805978	3.93332614224127e-10	5.56583758363522e-08	270.805894409966	-0.468149508965717
TGGT1_264950:E008	TGGT1_264950	E008	0.0550532657252332	3.95665700443977e-10	5.5885598207746e-08	18.0451191266783	1.76814008813776
TGGT1_285268:E016	TGGT1_285268	E016	0.0593321110000837	4.08514574108887e-10	5.75945584051459e-08	27.0849756009168	1.73897847481417
TGGT1_297180:E012	TGGT1_297180	E012	0.00429681007964958	4.0936680639636e-10	5.76090060495917e-08	232.93130452172	0.394014494907912
TGGT1_321360:E013	TGGT1_321360	E013	0.0261944037081637	4.2909924451062e-10	6.02755002750686e-08	37.9520001516095	1.14494573278575
TGGT1_259940:E002	TGGT1_259940	E002	0.0121890258294449	4.34967962727829e-10	6.09883820294128e-08	81.6832968220721	-0.710083001342815
TGGT1_277270:E007	TGGT1_277270	E007	0.0163500173277339	4.50850631896896e-10	6.31002003698758e-08	60.8513484840341	0.830926007222636
TGGT1_258080:E030	TGGT1_258080	E030	0.0359006389165405	4.5918542723665e-10	6.414987395015e-08	27.6812739766108	1.36574033936383
TGGT1_246050:E004	TGGT1_246050	E004	0.0162791806129695	4.63341842366068e-10	6.46130619634874e-08	61.1166978756421	0.841834136536539
TGGT1_268280:E028	TGGT1_268280	E028	0.00694647064064017	4.65271784829667e-10	6.47646524111542e-08	143.638234415981	0.523806085576742
TGGT1_266960:E002	TGGT1_266960	E002	0.00541115511987652	4.81113842289191e-10	6.68487238697551e-08	184.654630445271	-0.471545975598657
TGGT1_219070:E043	TGGT1_219070	E043	0.00350738136677306	4.88256419587597e-10	6.77186976748234e-08	285.879832821199	-0.361819889781679
TGGT1_256980:E004	TGGT1_256980	E004	0.0703866587797354	4.91897151717284e-10	6.81007233270288e-08	14.1121481211741	2.22032445411153
TGGT1_310100:E020	TGGT1_310100	E020	0.0662895467815195	5.15445691477512e-10	7.12325550288806e-08	14.9848223638156	2.87692876331387
TGGT1_295070:E018	TGGT1_295070	E018	0.0242433690810178	5.18310604266165e-10	7.14998777378803e-08	41.010620575539	1.03520373742301
TGGT1_224350A:E019	TGGT1_224350A	E019	0.019348896025283	5.2188429618329e-10	7.18638416950457e-08	51.4031605128167	0.962737981668961
TGGT1_219440:E012	TGGT1_219440	E012	0.0473066373345755	5.23876098166747e-10	7.20090657510524e-08	21.0022290117044	1.6567001796103
TGGT1_288860:E011	TGGT1_288860	E011	0.00550864151954505	5.28252485224869e-10	7.24809575128986e-08	181.366188665399	0.44527873688439
TGGT1_307990:E015	TGGT1_307990	E015	0.0143228279339277	5.57350010055907e-10	7.6337081502078e-08	69.4847883353295	0.748552336623175
TGGT1_310100:E023	TGGT1_310100	E023	0.0515684686855567	5.86550309680033e-10	8.01935340656311e-08	19.2653552004169	2.04030477009213
TGGT1_219430:E012	TGGT1_219430	E012	0.0381989457870277	6.30744895960203e-10	8.60826741934177e-08	26.0142747133111	1.42632034779935
TGGT1_290960:E019	TGGT1_290960	E019	0.0244802099500791	6.55156435335301e-10	8.9255771315352e-08	40.6132911147233	1.04158135397424
TGGT1_310270:E008	TGGT1_310270	E008	0.0314189510843856	6.69926461742676e-10	9.11064416653487e-08	31.6341525942552	1.24774244862271
TGGT1_224290:E004	TGGT1_224290	E004	0.0262871228323583	6.92469408485954e-10	9.40057808124298e-08	37.8179609920801	1.15398810937491
TGGT1_271430:E018	TGGT1_271430	E018	0.016433875341041	7.41069675032285e-10	1.00426050476994e-07	60.5401853629198	0.834264806557634
TGGT1_219070:E023	TGGT1_219070	E023	0.0573429526394612	7.58195209255413e-10	1.02565924812602e-07	17.3241488527798	1.84231705878514
TGGT1_207770:E014	TGGT1_207770	E014	0.0285440714611798	7.65106485933537e-10	1.03318957925615e-07	34.8241149189765	1.13360519814787
TGGT1_308810B:E002	TGGT1_308810B	E002	0.0101101698255902	7.74994340120859e-10	1.04470596687485e-07	98.5365907383477	-0.639822383914909
TGGT1_284040:E025	TGGT1_284040	E025	0.0381088267861734	7.8797612991929e-10	1.0603453921998e-07	26.0758485388193	1.40981139010658
TGGT1_250220:E008	TGGT1_250220	E008	0.00337529242023361	8.24359706965664e-10	1.10736585321889e-07	297.183092099547	0.355712139041688
TGGT1_232110:E003	TGGT1_232110	E003	0.00415741341356917	8.32340154545191e-10	1.11613473743087e-07	240.80681317173	-0.0902862322129942
TGGT1_253930:E035	TGGT1_253930	E035	0.0412229463248387	8.35848047801866e-10	1.11888600085282e-07	24.1043403860235	1.42743136401897
TGGT1_262880:E012	TGGT1_262880	E012	0.0656403368265953	9.47961736880451e-10	1.26675714742058e-07	15.1331064183352	2.15436445789697
TGGT1_320640:E016	TGGT1_320640	E016	0.0275244297727268	1.01121826593211e-09	1.34894058853169e-07	36.1157934092011	1.12474452913939
TGGT1_262140:E005	TGGT1_262140	E005	0.0236462322136103	1.05569290543169e-09	1.40582800302694e-07	42.0477735761324	0.998566580950845
TGGT1_262880:E013	TGGT1_262880	E013	0.0664120747222462	1.09886514765462e-09	1.46078722059409e-07	14.9571615143215	2.1464794790148
TGGT1_255260:E004	TGGT1_255260	E004	0.00356635106307637	1.10230876168108e-09	1.46283416789792e-07	281.106595337637	-0.376130436633125
TGGT1_318290:E011	TGGT1_318290	E011	0.0175246227097884	1.15979820476735e-09	1.5364726665467e-07	56.7646749507786	0.848583167491987
TGGT1_297510:E002	TGGT1_297510	E002	0.0173887279359981	1.1639986819049e-09	1.53862867399488e-07	57.209179516581	0.827977891996237
TGGT1_318330:E005	TGGT1_318330	E005	0.0253677591502728	1.1654305715541e-09	1.53862867399488e-07	39.1904055437181	1.06402418907635
TGGT1_280560:E016	TGGT1_280560	E016	0.0716990073474759	1.17396271393809e-09	1.54723452917429e-07	25.3257181432652	1.86849129974194
TGGT1_207430:E003	TGGT1_207430	E003	0.0383191315829145	1.20439306345727e-09	1.584622428371e-07	25.9326088285253	1.34875707169842
TGGT1_224830:E011	TGGT1_224830	E011	0.00921352013033316	1.24920567153732e-09	1.63518255849937e-07	108.162132316852	0.500391103471257
TGGT1_261022:E063	TGGT1_261022	E063	0.0114313508006776	1.245344079545e-09	1.63518255849937e-07	185.723133558079	0.608086081636455
TGGT1_295760:E037	TGGT1_295760	E037	0.0891686114621227	1.2472827443681e-09	1.63518255849937e-07	11.1384967684532	2.45485950137361
TGGT1_217020:E008	TGGT1_217020	E008	0.0194364001826368	1.30019289837748e-09	1.69902928116718e-07	51.1713277601318	0.878252213618601
TGGT1_211850:E003	TGGT1_211850	E003	0.027132451471171	1.31255711984053e-09	1.71227421760928e-07	36.638217407784	-1.0793214043638
TGGT1_234270:E017	TGGT1_234270	E017	0.0360601030460574	1.31578104838465e-09	1.71357065109714e-07	27.5587451946412	1.26918058593939
TGGT1_262140:E017	TGGT1_262140	E017	0.0200137394258783	1.33098045122465e-09	1.73043223233077e-07	49.692630235773	0.895274736620265
TGGT1_222110:E030	TGGT1_222110	E030	0.00201978539439353	1.33654355022778e-09	1.73472967514952e-07	500.095349678869	0.212318591738357
TGGT1_306220:E015	TGGT1_306220	E015	0.0394210569066618	1.34035973881354e-09	1.73674909361242e-07	25.2070867620911	1.3586598735607
TGGT1_233090:E009	TGGT1_233090	E009	0.0161153483316812	1.35607219005934e-09	1.75415014928601e-07	61.7393580169769	0.790134770774415
TGGT1_279390:E005	TGGT1_279390	E005	0.00452914845353919	1.37230239425558e-09	1.77216132886413e-07	220.890501749484	0.415080093670214
TGGT1_313480:E033	TGGT1_313480	E033	0.0827362140591716	1.38392103506126e-09	1.78416678810406e-07	12.0048301900667	2.59153038515471
TGGT1_248450:E019	TGGT1_248450	E019	0.0124976737161055	1.46579202301227e-09	1.88655044677041e-07	79.6604231078075	-0.704561859983356
TGGT1_240755:E004	TGGT1_240755	E004	0.00524621121466329	1.53996238023636e-09	1.97869714732812e-07	310.083104992553	-0.282101761636154
TGGT1_239050:E030	TGGT1_239050	E030	0.0256220556347712	1.56491074721409e-09	2.0073964454706e-07	38.8009196529295	1.04302094565344
TGGT1_278660:E005	TGGT1_278660	E005	0.00825136712198237	1.57512130870395e-09	2.01712659994809e-07	120.82740118318	-0.555562637369472
TGGT1_287160:E002	TGGT1_287160	E002	0.00912631036082677	1.5943539164709e-09	2.03835893310939e-07	109.199639664303	-0.608215883929868
TGGT1_306410:E013	TGGT1_306410	E013	0.0500737790159137	1.66232729982598e-09	2.12173160692241e-07	28.2790931033647	1.44774767386059
TGGT1_217020:E013	TGGT1_217020	E013	0.0119968602440958	1.68405987994394e-09	2.14590562181182e-07	82.9954752199316	0.676041219051483
TGGT1_249350:E013	TGGT1_249350	E013	0.00780545321613982	1.69246942957761e-09	2.15305088676249e-07	127.760757592069	0.522246426052327
TGGT1_310390:E003	TGGT1_310390	E003	0.00255178004582527	1.70279684774753e-09	2.16260828744425e-07	394.405622618033	-0.293643226223508
TGGT1_239820:E020	TGGT1_239820	E020	0.00423795425977703	1.70693787271674e-09	2.16429018689664e-07	236.192775200607	-0.411253876729635
TGGT1_304955:E025	TGGT1_304955	E025	0.00156799807796352	1.75004273950859e-09	2.21528886286032e-07	647.431919228626	-0.190596793291517
TGGT1_255260:E002	TGGT1_255260	E002	0.00478600509546827	1.75791773813778e-09	2.22159745469231e-07	590.291918657753	0.374547891927563
TGGT1_233540:E013	TGGT1_233540	E013	0.0262449912044167	1.76689633697756e-09	2.22927773143424e-07	37.8787509154416	1.03384675408446
TGGT1_310530:E017	TGGT1_310530	E017	0.0915859721981468	1.77790649760376e-09	2.23949182879312e-07	10.8443914820341	14.0167356732127
TGGT1_310970:E021	TGGT1_310970	E021	0.0226656056893097	1.78204919045406e-09	2.24103622990047e-07	86.1225095349227	0.882235788965405
TGGT1_273500:E012	TGGT1_273500	E012	0.04625420375261	1.792294376353e-09	2.25023730385352e-07	21.4804549852948	1.55294615138363
TGGT1_281430:E010	TGGT1_281430	E010	0.0191797267097035	1.80815338941314e-09	2.26644505680812e-07	51.8573650382542	0.858329911545744
TGGT1_247040:E004	TGGT1_247040	E004	0.0100131249672851	1.81110563410298e-09	2.26644826722427e-07	99.4948883994825	0.613153922366749
TGGT1_312618:E013	TGGT1_312618	E013	0.0458130661927577	1.8391665024263e-09	2.2978217324704e-07	21.6874479376043	1.61687868986155
TGGT1_300310:E008	TGGT1_300310	E008	0.0508880150015867	1.84674373760109e-09	2.30354299620219e-07	19.523138526412	1.63658320535764
TGGT1_226740:E010	TGGT1_226740	E010	0.00979832570474693	1.88952029989659e-09	2.35308057185015e-07	101.683731475404	0.617410971200991
TGGT1_214170:E016	TGGT1_214170	E016	0.0434478814370824	1.91288906054089e-09	2.37832777904176e-07	22.8689926251005	1.51883307585633
TGGT1_227790:E012	TGGT1_227790	E012	0.0194675461772629	1.95124606513047e-09	2.42209844759983e-07	51.0893136541341	0.864024195818741
TGGT1_214180:E006	TGGT1_214180	E006	0.0114420992600489	1.980686436624e-09	2.4546774795303e-07	144.190682589426	0.635615759678726
TGGT1_222140:E017	TGGT1_222140	E017	0.0640165195883925	1.9927715105542e-09	2.46567769012001e-07	15.5171738272517	2.10004323735233
TGGT1_306310:E017	TGGT1_306310	E017	0.0413504203090586	2.11773482629282e-09	2.61608345414568e-07	24.029970068109	1.53252520811672
TGGT1_282055:E013	TGGT1_282055	E013	0.00484923248415925	2.20262516272338e-09	2.71658281907185e-07	212.240201331506	-0.437021322642957
TGGT1_297500:E003	TGGT1_297500	E003	0.0140806819921813	2.20802864687588e-09	2.71888296698721e-07	70.6826575406112	0.742895081611393
TGGT1_220500:E009	TGGT1_220500	E009	0.00411120598469832	2.21693530211901e-09	2.7254825249427e-07	243.536254689773	0.379858691250348
TGGT1_246340:E018	TGGT1_246340	E018	0.0199142392194623	2.22066904344743e-09	2.725711618073e-07	60.4428409014008	0.875150709718088
TGGT1_261430:E006	TGGT1_261430	E006	0.00152517727970448	2.22721682340156e-09	2.72938850174969e-07	666.030181706669	-0.15548178354527
TGGT1_262150:E007	TGGT1_262150	E007	0.0216589506265541	2.23141244747792e-09	2.73017576794364e-07	45.9119577967062	0.946103102402231
TGGT1_300280:E007	TGGT1_300280	E007	0.0092289787794276	2.26484959411632e-09	2.76668121245017e-07	107.980279169447	0.554042979838264
TGGT1_310860:E008	TGGT1_310860	E008	0.0152054104358139	2.32053218963678e-09	2.83020209293843e-07	65.4424365172015	0.749657519169735
TGGT1_244300:E004	TGGT1_244300	E004	0.0860970435414084	2.33229045786696e-09	2.84003489558041e-07	11.5360292801823	2.55822393701329
TGGT1_259690:E002	TGGT1_259690	E002	0.00879116993195027	2.39140413991039e-09	2.90741012497302e-07	113.379004281533	-0.527347886287766
TGGT1_410800:E024	TGGT1_410800	E024	0.00529822119141903	2.41465021925462e-09	2.93103442175145e-07	188.616441708257	-0.442403165745585
TGGT1_237140:E004	TGGT1_237140	E004	0.0422596693488617	2.466853846934e-09	2.98967900689066e-07	23.512524188626	1.51830342728582
TGGT1_204050:E016	TGGT1_204050	E016	0.00343154260961657	2.52881131717082e-09	3.05994134137723e-07	292.262127686439	0.349251906190569
TGGT1_209250:E011	TGGT1_209250	E011	0.0191510546969737	2.56825855619412e-09	3.10278746355798e-07	67.5983556215795	0.87491858655979
TGGT1_306900:E006	TGGT1_306900	E006	0.00733154464688996	2.70960417629249e-09	3.26841218357592e-07	264.95043296689	0.385845937003684
TGGT1_290670:E016	TGGT1_290670	E016	0.0154370583504269	2.7663343388654e-09	3.33161178049217e-07	64.4582085910152	0.763727059687664
TGGT1_210255:E006	TGGT1_210255	E006	0.00896170458768878	2.82010710259545e-09	3.39105742475942e-07	111.213141234044	-0.534793360367507
TGGT1_206540:E015	TGGT1_206540	E015	0.00691084189169924	2.84708175197269e-09	3.41814407150509e-07	144.382477344752	0.516475655751447
TGGT1_275980:E012	TGGT1_275980	E012	0.0292511289044614	2.871865427206e-09	3.44251987254645e-07	43.5448972827648	1.03157607650345
TGGT1_304970:E013	TGGT1_304970	E013	0.0431817611603062	2.9677082405926e-09	3.55186601374476e-07	49.7622542818082	1.25978840641282
TGGT1_285240:E012	TGGT1_285240	E012	0.0322061866966432	2.99070879390955e-09	3.57382724102066e-07	74.708124807736	1.01206789202615
TGGT1_289250:E007	TGGT1_289250	E007	0.0313403132308028	3.02386316578127e-09	3.60783500107353e-07	31.7136152738757	1.13072369918881
TGGT1_250010:E018	TGGT1_250010	E018	0.0684664291963886	3.16202958425463e-09	3.76683514985075e-07	14.5081412537396	2.24483624726865
TGGT1_293810:E011	TGGT1_293810	E011	0.0200594037177358	3.20343378348703e-09	3.81025141829401e-07	49.5793122603709	0.875334008266187
TGGT1_226960:E016	TGGT1_226960	E016	0.0247917284151068	3.2459182671109e-09	3.85481641251933e-07	40.102256421434	1.03962400476705
TGGT1_255320:E006	TGGT1_255320	E006	0.0370191323750811	3.3578160621968e-09	3.98155112300949e-07	26.8441331861982	1.29890453282404
TGGT1_275810:E002	TGGT1_275810	E002	0.0116875358454891	3.37441965527106e-09	3.98892743157019e-07	85.1985560121447	0.676115529659033
TGGT1_310560:E026	TGGT1_310560	E026	0.0164158299567289	3.3698194030798e-09	3.98892743157019e-07	60.6068754636755	0.839108947954659
TGGT1_258828:E001	TGGT1_258828	E001	0.0369155882892929	3.38427290916232e-09	3.99442976223203e-07	26.919498453471	1.02798766642796
TGGT1_209250:E010	TGGT1_209250	E010	0.0197485274320202	3.39127708411467e-09	3.99655762748649e-07	50.3611439613979	0.920351202812239
TGGT1_248850:E004	TGGT1_248850	E004	0.038718135120728	3.44866893386721e-09	4.05796898731324e-07	25.665125972035	1.33935383734366
TGGT1_242790A:E006	TGGT1_242790A	E006	0.122519242755757	3.46829632654461e-09	4.07482392725854e-07	8.10566210801606	3.12604614253887
TGGT1_319530:E014	TGGT1_319530	E014	0.0162861148526399	3.51530672287281e-09	4.12374996435692e-07	77.1054017527173	0.755439760391286
TGGT1_237830:E009	TGGT1_237830	E009	0.0127708544305787	3.59242790405949e-09	4.20779547049115e-07	77.9517918597137	0.696467785178666
TGGT1_230410:E005	TGGT1_230410	E005	0.0094150347815241	3.7566696549321e-09	4.39347376371412e-07	176.786322068614	0.538284556191082
TGGT1_224830:E002	TGGT1_224830	E002	0.012076226201635	3.90694216639717e-09	4.56227530759057e-07	193.516509295783	-0.532892489718178
TGGT1_260170:E009	TGGT1_260170	E009	0.0409127259330157	3.94886188816871e-09	4.60422914872867e-07	24.2872657021493	1.39123731524357
TGGT1_308040:E010	TGGT1_308040	E010	0.0461453606481905	3.98048822579768e-09	4.63407233038813e-07	21.5311588892013	1.60393425519322
TGGT1_250100:E001	TGGT1_250100	E001	0.00213685173382325	4.084004378613e-09	4.74739250286668e-07	472.247956988569	-0.222638301302655
TGGT1_228630:E003	TGGT1_228630	E003	0.0299814695780366	4.2996391249109e-09	4.99050410031388e-07	33.1526216470997	1.10426709651806
TGGT1_230080:E021	TGGT1_230080	E021	0.0412510041497819	4.39113123714471e-09	5.08900981702094e-07	24.0879315279958	1.39654589056656
TGGT1_229030:E012	TGGT1_229030	E012	0.0209947157254873	4.68442426053792e-09	5.42073956185169e-07	100.664033307498	0.792181710556661
TGGT1_240710:E024	TGGT1_240710	E024	0.0406408347688056	4.71252659962739e-09	5.44505874188827e-07	24.4498880360687	1.37037010712971
TGGT1_314430:E018	TGGT1_314430	E018	0.0170002810207847	4.7412815016405e-09	5.47005775888215e-07	58.5190373636017	0.799797568865751
TGGT1_217220:E014	TGGT1_217220	E014	0.0157409405931022	4.77991292276627e-09	5.50635935901937e-07	63.2110937257626	0.774795445044631
TGGT1_208050:E008	TGGT1_208050	E008	0.106462242101721	4.94431440792623e-09	5.68721985272197e-07	9.32858245909297	15.3041836070333
TGGT1_212850:E006	TGGT1_212850	E006	0.0256923090405955	5.03505012824983e-09	5.78293193877926e-07	38.6946791179852	0.998929539301758
TGGT1_226850:E031	TGGT1_226850	E031	0.00990546962830597	5.05963360334584e-09	5.80249354000424e-07	100.580007990531	0.599183637071899
TGGT1_234220:E007	TGGT1_234220	E007	0.00939535652389535	5.12719180075229e-09	5.87120769589276e-07	106.061057111447	0.554070813834025
TGGT1_263060:E013	TGGT1_263060	E013	0.00984062423032889	5.26543921992519e-09	6.02054394853262e-07	101.245119587213	0.60255260612319
TGGT1_269660:E011	TGGT1_269660	E011	0.0195682225148922	5.43080707371989e-09	6.20040004641033e-07	50.8260002258405	0.883297828104519
TGGT1_208420:E005	TGGT1_208420	E005	0.0470703716878692	5.74884371795386e-09	6.55376713288458e-07	44.3914289448044	1.2724696282436
TGGT1_258400:E001	TGGT1_258400	E001	0.000701989444771796	5.75923844680479e-09	6.55589043758725e-07	1487.44852024191	-0.0477089201330031
TGGT1_240710:E025	TGGT1_240710	E025	0.0409989901447651	5.95216727115604e-09	6.76548338186119e-07	24.2361208428539	1.36691140930764
TGGT1_219850:E010	TGGT1_219850	E010	0.0241029452342101	5.99885433619062e-09	6.80847814815183e-07	48.2540261410907	0.946058659191941
TGGT1_219070:E026	TGGT1_219070	E026	0.0723753661646948	6.10937524868859e-09	6.92368828884196e-07	13.7241939234946	2.02354668917582
TGGT1_244000:E012	TGGT1_244000	E012	0.0351647231139624	6.3855659762803e-09	7.22603435816568e-07	28.2611479243966	1.23062564643047
TGGT1_269430:E019	TGGT1_269430	E019	0.0326955464258634	6.42516686116062e-09	7.26015508986763e-07	30.3976936760642	1.2997068925051
TGGT1_215080:E008	TGGT1_215080	E008	0.0266761550019834	6.45054342020831e-09	7.27812635504473e-07	37.2657273960074	1.02531466455914
TGGT1_236650:E004	TGGT1_236650	E004	0.00366266286045216	6.54893664439366e-09	7.3783085769102e-07	273.644398809889	0.375348443995971
TGGT1_222660:E028	TGGT1_222660	E028	0.0621342604528201	6.58239387012552e-09	7.39431868126951e-07	15.9875033986743	1.82386065797096
TGGT1_272695:E001	TGGT1_272695	E001	0.0279008469172392	6.57747381618055e-09	7.39431868126951e-07	35.6279427475696	1.09113298929289
TGGT1_269430:E053	TGGT1_269430	E053	0.00830327066994694	6.62208714466372e-09	7.42804832021206e-07	120.068958405239	-0.532961391379492
TGGT1_215230:E011	TGGT1_215230	E011	0.0380692648820351	6.64351880195556e-09	7.44122527967725e-07	26.1029713799362	1.27463222392355
TGGT1_253690:E002	TGGT1_253690	E002	0.00602479373392165	6.68705102891858e-09	7.47908209474552e-07	199.78380576887	-0.430150157222425
TGGT1_261022:E064	TGGT1_261022	E064	0.0136998289621594	6.70701829469605e-09	7.49051111496454e-07	111.626581822582	0.665042266127916
TGGT1_226220:E014	TGGT1_226220	E014	0.0254127834064836	7.00026917188666e-09	7.80667173236945e-07	39.1208767842026	0.977461076961734
TGGT1_288650:E005	TGGT1_288650	E005	0.000800208340438327	7.24188542982585e-09	8.06441667784824e-07	2392.21961688667	0.144672433913952
TGGT1_306350:E011	TGGT1_306350	E011	0.0673451872215408	7.30234595762496e-09	8.11997621340129e-07	19.1270550819203	1.64247194656613
TGGT1_262720:E002	TGGT1_262720	E002	0.0103846816522299	7.44162327913219e-09	8.26289028755318e-07	213.61106551805	0.551583049528313
TGGT1_203300:E018	TGGT1_203300	E018	0.126309628237974	7.72235602259205e-09	8.5498943761946e-07	387.342814810947	1.79136342704846
TGGT1_304955:E017	TGGT1_304955	E017	0.00900856841697705	7.7211637488803e-09	8.5498943761946e-07	558.961635323326	0.50404496880159
TGGT1_230180:E011	TGGT1_230180	E011	0.00498567861921689	7.88210074699053e-09	8.71420108052534e-07	889.186291793112	-0.356751114810469
TGGT1_313480:E009	TGGT1_313480	E009	0.0204101253214922	8.04134640341162e-09	8.87748467814567e-07	48.7259123501437	0.878020963233281
TGGT1_299110:E014	TGGT1_299110	E014	0.03276329058437	8.14270274260847e-09	8.9764827924506e-07	30.3347745249564	1.14235519069513
TGGT1_206550:E032	TGGT1_206550	E032	0.0150037669345637	8.17587439644593e-09	9.00013840973805e-07	66.3239802619998	0.842878558266706
TGGT1_311800:E010	TGGT1_311800	E010	0.0205480366279706	8.19258088618129e-09	9.00562714665969e-07	48.3983305011306	0.84811319038484
TGGT1_310560:E008	TGGT1_310560	E008	0.0136286676681978	8.89228467098451e-09	9.76080681806338e-07	73.032903030743	0.730854436358425
TGGT1_285870:E002	TGGT1_285870	E002	0.0150291810621444	9.16537553229375e-09	1.00462191123374e-06	269.360438886762	-0.623369644413512
TGGT1_218790:E019	TGGT1_218790	E019	0.0349306900472836	9.20972085631484e-09	1.00804461743114e-06	50.1835631363399	1.07123339773132
TGGT1_288460:E006	TGGT1_288460	E006	0.0318995885560735	9.49865038677726e-09	1.0381903268404e-06	31.1569980811905	1.12447246654368
TGGT1_227948:E024	TGGT1_227948	E024	0.0207682162387723	9.56665948086745e-09	1.04413837291394e-06	66.7773114764153	0.826096976349282
TGGT1_257390:E009	TGGT1_257390	E009	0.027429962273668	9.86316411124182e-09	1.07497296569573e-06	36.2403312504463	1.18009609153169
TGGT1_213445:E015	TGGT1_213445	E015	0.0546286906783011	9.99395756317213e-09	1.08768515195674e-06	113.065842021377	1.22282329215957
TGGT1_319870:E004	TGGT1_319870	E004	0.0136840880848951	1.01049137816073e-08	1.09820546002456e-06	72.7363723838564	-0.709621502021047
TGGT1_223810:E017	TGGT1_223810	E017	0.0283486750177305	1.0173780841742e-08	1.10412824652109e-06	35.0644367396141	-1.07899493709299
TGGT1_288640:E023	TGGT1_288640	E023	0.00269082398400187	1.04257305129467e-08	1.12987567760689e-06	525.805109793824	-0.247610966598225
TGGT1_249810:E063	TGGT1_249810	E063	0.0197352088708491	1.07692145429366e-08	1.16545653216284e-06	50.395190391663	0.835777380955786
TGGT1_243280A:E013	TGGT1_243280A	E013	0.00832360455137035	1.08244849327078e-08	1.16814739996414e-06	119.774418124692	0.522880943778763
TGGT1_259260:E007	TGGT1_259260	E007	0.00643782195034705	1.08165249877854e-08	1.16814739996414e-06	155.048199424721	-0.471583020533225
TGGT1_235470:E006	TGGT1_235470	E006	0.00698938353928723	1.11854493789377e-08	1.20220608813079e-06	142.751957215621	0.487194037749604
TGGT1_241880:E030	TGGT1_241880	E030	0.0799585839038712	1.11603879020757e-08	1.20220608813079e-06	33.7611523881403	1.66797686336608
TGGT1_260200:E011	TGGT1_260200	E011	0.00388457821337394	1.1187023868885e-08	1.20220608813079e-06	257.871659541967	0.331091316533104
TGGT1_312660:E011	TGGT1_312660	E011	0.0323310352154508	1.13025064876866e-08	1.21291995948935e-06	30.7407740854111	1.10693624710516
TGGT1_244390:E011	TGGT1_244390	E011	0.0207914328573107	1.14442836682811e-08	1.22642179110141e-06	47.8308099942514	0.866846737097874
TGGT1_254835:E002	TGGT1_254835	E002	0.0663186280537229	1.15002454424885e-08	1.23070244995054e-06	14.9782479715444	2.11993847718696
TGGT1_244700:E003	TGGT1_244700	E003	0.0105272893803985	1.1548177943035e-08	1.23411314131986e-06	119.608114497523	-0.584435829302486
TGGT1_226910:E025	TGGT1_226910	E025	0.0417996372075305	1.18007400707802e-08	1.2593520344702e-06	23.7715086890914	1.41050621031819
TGGT1_242000:E007	TGGT1_242000	E007	0.00321020241692084	1.18581709875385e-08	1.26372577554715e-06	312.632378517517	0.326869685955276
TGGT1_220230A:E014	TGGT1_220230A	E014	0.030772859377299	1.22911408491321e-08	1.30805317094843e-06	32.2990735711273	1.15680253986524
TGGT1_223390:E013	TGGT1_223390	E013	0.0279647890667342	1.24795922440621e-08	1.32627168638589e-06	35.5463779189878	1.03529736944397
TGGT1_277030:E038	TGGT1_277030	E038	0.0404423987998966	1.27050820388553e-08	1.34837070251315e-06	26.7391114591578	1.33623946088978
TGGT1_295760:E027	TGGT1_295760	E027	0.0372323455149333	1.27642995084908e-08	1.35278687080539e-06	26.6902660572219	1.17793322874523
TGGT1_205100:E006	TGGT1_205100	E006	0.0524300075883704	1.32569846250467e-08	1.40306739343624e-06	18.9485749742526	1.48660745408306
TGGT1_277870:E004	TGGT1_277870	E004	0.0208130958866425	1.34521733599822e-08	1.4217670487771e-06	72.2256543075165	0.797866456477253
TGGT1_286120:E017	TGGT1_286120	E017	0.0154550294977427	1.35356137681645e-08	1.42862081745118e-06	64.3830886151962	0.738050560129928
TGGT1_202470:E004	TGGT1_202470	E004	0.0457246649242786	1.37033026307386e-08	1.44433561623877e-06	21.7294088046555	1.33056045670302
TGGT1_249010:E001	TGGT1_249010	E001	0.00275762766598795	1.39712039305306e-08	1.47055533754819e-06	364.591306397392	0.230710722981983
TGGT1_312230:E025	TGGT1_312230	E025	0.026551609980451	1.42484151130571e-08	1.49768190429818e-06	37.4407564664138	0.990852777693143
TGGT1_260540:E012	TGGT1_260540	E012	0.00654107834584297	1.42820442504246e-08	1.49916589353808e-06	152.587646789934	-0.46368634595379
TGGT1_286410:E007	TGGT1_286410	E007	0.00861627775669324	1.44495838325234e-08	1.51468304630231e-06	115.689616122926	0.540538246762529
TGGT1_255190:E024	TGGT1_255190	E024	0.0167642856532003	1.49949889576819e-08	1.56971385087385e-06	137.886623370146	0.684847735757834
TGGT1_240070:E005	TGGT1_240070	E005	0.0152028408034295	1.50940753131049e-08	1.57793668684768e-06	168.405152485108	0.599292966296899
TGGT1_266920:E038	TGGT1_266920	E038	0.000780298708105236	1.54810709452612e-08	1.61619435899597e-06	1331.26049830262	0.146470014474611
TGGT1_249840:E059	TGGT1_249840	E059	0.061968052178221	1.5716286376081e-08	1.63852414691851e-06	16.0304083558889	1.86030645161146
TGGT1_286140:E002	TGGT1_286140	E002	0.00792865296830312	1.58496941157369e-08	1.65019369481148e-06	125.766858741644	-0.494227331854165
TGGT1_244840:E010	TGGT1_244840	E010	0.0281320518191788	1.60949800775823e-08	1.67346411937915e-06	35.3347726434303	1.01464446559041
TGGT1_293060:E010	TGGT1_293060	E010	0.0164439253614766	1.61203833947832e-08	1.67384040392562e-06	60.5031072206201	0.774444268696834
TGGT1_304955:E021	TGGT1_304955	E021	0.0076038417518678	1.61738737460996e-08	1.67712812014718e-06	1521.38963691635	0.412118698356753
TGGT1_219790A:E003	TGGT1_219790A	E003	0.0686536595695925	1.66379035873339e-08	1.72291994331533e-06	19.7989210706741	1.60737454980787
TGGT1_233430:E012	TGGT1_233430	E012	0.00303583945819665	1.68701124416183e-08	1.74461484478685e-06	330.794919713607	-0.216091272359059
TGGT1_214480:E001	TGGT1_214480	E001	0.0110927912803303	1.7652375052301e-08	1.8230585240506e-06	89.7807730240109	0.57138482750877
TGGT1_232410:E006	TGGT1_232410	E006	0.00998527266948501	1.78999230798186e-08	1.84614280494499e-06	152.401736650389	0.543578551052502
TGGT1_224350B:E001	TGGT1_224350B	E001	0.00244892710953899	1.82631120110815e-08	1.881076055758e-06	411.207201720357	-0.197333838671808
TGGT1_267430:E017	TGGT1_267430	E017	0.0230592048501806	1.85958220771958e-08	1.91278069738353e-06	43.1198055561029	-0.920396575516818
TGGT1_297500:E018	TGGT1_297500	E018	0.0244318673069038	1.874524277869e-08	1.92557248581044e-06	40.6937651998044	0.9482320227776
TGGT1_305760:E004	TGGT1_305760	E004	0.0440052904314814	1.89688777789712e-08	1.94594347383553e-06	22.5790867771358	1.35019834082038
TGGT1_309370:E011	TGGT1_309370	E011	0.023930021917762	1.91792107860408e-08	1.96489735888936e-06	41.5484022922281	0.915586028434105
TGGT1_223140:E017	TGGT1_223140	E017	0.0122129167317681	1.92460046107744e-08	1.96911485523046e-06	81.5230550077834	0.635474102505845
TGGT1_227840:E013	TGGT1_227840	E013	0.0118764400453063	1.96105204670704e-08	2.00374143767059e-06	83.8394545228692	0.626070151667331
TGGT1_305040:E014	TGGT1_305040	E014	0.0271079027952536	1.96624098201247e-08	2.0063752766918e-06	36.6714389627609	1.04667390086425
TGGT1_229740:E009	TGGT1_229740	E009	0.0246300102476452	2.03138350651295e-08	2.07009833541028e-06	40.3659334021187	0.955343491654762
TGGT1_201790:E004	TGGT1_201790	E004	0.0273356850004723	2.0395027304352e-08	2.07561948739668e-06	117.804095973485	0.840220403187076
TGGT1_301390:E004	TGGT1_301390	E004	0.0340726357560544	2.05997742708764e-08	2.09368367149646e-06	29.1678857318793	1.11342667469364
TGGT1_306900:E001	TGGT1_306900	E001	0.00735341849676541	2.18809406107199e-08	2.22095882920196e-06	135.651608075287	-0.388533181364182
TGGT1_226220:E015	TGGT1_226220	E015	0.023104651552453	2.1942353420437e-08	2.22425410259382e-06	43.0348622456056	0.898598655631407
TGGT1_259115:E027	TGGT1_259115	E027	0.00420996127890546	2.22959466530263e-08	2.25711943738944e-06	237.776259801973	0.369563526703477
TGGT1_232670:E002	TGGT1_232670	E002	0.00432115416255558	2.27019145325335e-08	2.29519343017931e-06	231.608470631371	-0.374645702488379
TGGT1_316730:E021	TGGT1_316730	E021	0.0839571537252769	2.27971089998279e-08	2.30178904628092e-06	11.8301791632842	2.11533866745186
TGGT1_236070:E002	TGGT1_236070	E002	0.0358022822572177	2.29710241397945e-08	2.31630522549789e-06	27.7573938623712	1.13456144915325
TGGT1_304955:E020	TGGT1_304955	E020	0.00529030970303728	2.34721977332481e-08	2.3637395245473e-06	772.750129523107	0.378856241442146
TGGT1_202500:E009	TGGT1_202500	E009	0.00431693788718401	2.37667390315828e-08	2.39026822901797e-06	254.455067305495	-0.382164960124788
TGGT1_310530:E018	TGGT1_310530	E018	0.0705807209976012	2.3805283027446e-08	2.39101507448349e-06	14.0733276758583	2.13684631116517
TGGT1_215090:E006	TGGT1_215090	E006	0.0644042094079692	2.41737243454592e-08	2.42485177223505e-06	15.4237160088651	1.68762662681589
TGGT1_263100:E008	TGGT1_263100	E008	0.00349841894295152	2.42634806550333e-08	2.43068195970116e-06	286.6195136251	-0.325597244284162
TGGT1_262530:E023	TGGT1_262530	E023	0.0221870864287754	2.43223558954429e-08	2.43340736971113e-06	44.8173779127156	0.906006738365799
TGGT1_313910:E002	TGGT1_313910	E002	0.0133160508181886	2.49061647713955e-08	2.48857605011667e-06	93.0359856189903	0.645900764994165
TGGT1_313775:E006	TGGT1_313775	E006	0.121939216528201	2.51169383779161e-08	2.50637687551161e-06	8.14422909453857	-1.5603423378078
TGGT1_227840:E007	TGGT1_227840	E007	0.00963935514013243	2.64893312084563e-08	2.63989720112082e-06	103.366709636697	0.554285427427554
TGGT1_286440:E003	TGGT1_286440	E003	0.0343715668905149	2.66490996357312e-08	2.65237936361487e-06	65.9526473674664	0.979009525434744
TGGT1_217020:E002	TGGT1_217020	E002	0.0107342094875818	2.67007580152002e-08	2.65408298009565e-06	92.7896233399311	0.587927066391454
TGGT1_277030:E028	TGGT1_277030	E028	0.0803820643837097	2.68350201010806e-08	2.66398247998285e-06	12.3565667477507	2.21243505473175
TGGT1_269200:E013	TGGT1_269200	E013	0.0494107648183453	2.70211945701288e-08	2.67900326088386e-06	20.1072364605915	1.44728208397797
TGGT1_275990:E016	TGGT1_275990	E016	0.0254724051786773	2.74193016687079e-08	2.71497020917334e-06	39.0291845542794	0.955888628335211
TGGT1_257040:E003	TGGT1_257040	E003	0.00933592742506097	2.77593243197876e-08	2.74510064705215e-06	552.507747688951	-0.449930128652844
TGGT1_263820:E002	TGGT1_263820	E002	0.0351736640260431	2.83963178105068e-08	2.80448312545747e-06	28.2539570699157	1.1826613789743
TGGT1_315780:E015	TGGT1_315780	E015	0.00786684134600065	2.96576142962706e-08	2.92529154002894e-06	126.759394376604	-0.504040526974456
TGGT1_273090:E023	TGGT1_273090	E023	0.0548149384786777	2.981227097571e-08	2.93677623712901e-06	18.1236260827805	1.45793698332318
TGGT1_214170:E010	TGGT1_214170	E010	0.0582821563299653	3.07122184545588e-08	3.01989431046486e-06	17.044808662851	1.66938730747673
TGGT1_280700:E026	TGGT1_280700	E026	0.0231913069531301	3.07346376196822e-08	3.01989431046486e-06	42.8738207348062	0.900456190052256
TGGT1_230010:E010	TGGT1_230010	E010	0.0368675985392008	3.1278562991779e-08	3.06941372234907e-06	26.9545718226426	1.20359542426726
TGGT1_262140:E016	TGGT1_262140	E016	0.0317612106989239	3.23021751632536e-08	3.16581917476902e-06	31.2928912092374	1.05794297219651
TGGT1_220910:E015	TGGT1_220910	E015	0.0733534352660855	3.28093078272233e-08	3.21142520448453e-06	13.5411141439615	1.84021936003711
TGGT1_260205:E002	TGGT1_260205	E002	0.0121199038539637	3.32149862050958e-08	3.24699732193504e-06	82.1504820610549	-0.454084526476739
TGGT1_208530:E013	TGGT1_208530	E013	0.0543116530758798	3.35913581357761e-08	3.27961777011262e-06	18.2916776487551	1.54179001720695
TGGT1_253170:E004	TGGT1_253170	E004	0.0546170870644064	3.37028188586562e-08	3.28632422924183e-06	18.1893207824052	1.60110574263203
TGGT1_262880:E021	TGGT1_262880	E021	0.0521966911040123	3.41876726541537e-08	3.3293766840649e-06	28.6452964646642	1.35135333812247
TGGT1_311335:E029	TGGT1_311335	E029	0.00548400889802892	3.47316108703407e-08	3.37806681575236e-06	182.185995523734	0.422604608991884
TGGT1_241300:E016	TGGT1_241300	E016	0.0148941001163507	3.51208266434675e-08	3.4116042437473e-06	66.8134652968315	0.697627290769285
TGGT1_221900:E004	TGGT1_221900	E004	0.0372964725614172	3.572188203563e-08	3.46560890147943e-06	26.6443326581025	1.16183973611474
TGGT1_240070:E001	TGGT1_240070	E001	0.0026429512416217	3.64851658545875e-08	3.53519632883851e-06	421.225657528834	-0.168501220116555
TGGT1_202030:E013	TGGT1_202030	E013	0.00710876589506556	3.6588112665136e-08	3.54070631341442e-06	140.342926479954	-0.463907457100824
TGGT1_205615:E014	TGGT1_205615	E014	0.043144271488105	3.70580164369754e-08	3.58166894209796e-06	23.0300525748727	1.33770964486633
TGGT1_250220:E009	TGGT1_250220	E009	0.00162457895603745	3.79110305763669e-08	3.6595098698446e-06	624.393546914213	0.211836574980689
TGGT1_270830:E005	TGGT1_270830	E005	0.0125454197341651	3.87047735038395e-08	3.73144125685635e-06	79.3564106506532	0.645658559819616
TGGT1_242660:E005	TGGT1_242660	E005	0.0101275559149087	3.92171267634091e-08	3.77609820691737e-06	98.3668532335439	-0.572477315405011
TGGT1_316730:E012	TGGT1_316730	E012	0.101347171771314	4.21277477434736e-08	4.05127628706544e-06	9.79956369043935	2.49359953162792
TGGT1_219500:E016	TGGT1_219500	E016	0.00956872279113413	4.29114609640315e-08	4.1181360341527e-06	104.13248283434	0.529564168440248
TGGT1_237530:E009	TGGT1_237530	E009	0.0679798621759246	4.29301894055769e-08	4.1181360341527e-06	14.6120362861892	1.96889372497099
TGGT1_283890:E008	TGGT1_283890	E008	0.0585632280803885	4.36119199812026e-08	4.17831558054322e-06	16.9629545653963	1.79476951632296
TGGT1_222210:E017	TGGT1_222210	E017	0.038232272242007	4.37512615807249e-08	4.18644543720817e-06	29.3565345687264	1.1135310003632
TGGT1_235170:E021	TGGT1_235170	E021	0.0135017191792914	4.5109019648369e-08	4.31099719243996e-06	84.3425348418526	-0.653004193589865
TGGT1_236650:E005	TGGT1_236650	E005	0.00499966360330532	4.69722219200951e-08	4.48348399462652e-06	828.034471902433	0.347684184824511
TGGT1_290850:E014	TGGT1_290850	E014	0.0278512785656924	4.72368037516196e-08	4.50314428022729e-06	35.6914303272864	0.982367443279097
TGGT1_248440:E003	TGGT1_248440	E003	0.0153201266310524	4.91263238169495e-08	4.67747130498506e-06	88.3708949841135	-0.648355915091462
TGGT1_218790:E020	TGGT1_218790	E020	0.0254480820669082	4.96105388246263e-08	4.71772892533145e-06	45.3880127534627	0.934358569260179
TGGT1_230340:E001	TGGT1_230340	E001	0.00126507462603324	4.98059964213964e-08	4.73046149200351e-06	1047.30057045045	-0.160042816578461
TGGT1_226910:E027	TGGT1_226910	E027	0.0426307025495537	5.17414344200701e-08	4.90821802041349e-06	23.3077187927856	1.32966419640414
TGGT1_277510:E012	TGGT1_277510	E012	0.0647114916575324	5.18741161313547e-08	4.91473669689877e-06	15.350437462261	1.52342717099199
TGGT1_246330:E005	TGGT1_246330	E005	0.0213977851032097	5.25250405125826e-08	4.97027898751885e-06	46.4732307554687	0.816277358424202
TGGT1_250220:E028	TGGT1_250220	E028	0.0220646272903495	5.28339967324501e-08	4.99336507617622e-06	45.0665050974021	-0.87381971353473
TGGT1_209300:E024	TGGT1_209300	E024	0.028784734195956	5.47391091773971e-08	5.16587520750436e-06	34.5326086370348	-0.857512596593294
TGGT1_263730:E005	TGGT1_263730	E005	0.021340465541899	5.47937620432351e-08	5.16587520750436e-06	46.5982580985354	0.851493179811808
TGGT1_256970:E013	TGGT1_256970	E013	0.0193525095411769	5.82615636890081e-08	5.48608305045627e-06	51.3935453206968	0.796226172000222
TGGT1_258080:E029	TGGT1_258080	E029	0.048561366419296	5.85779023128369e-08	5.50911906978145e-06	20.4591871292233	1.39163726126256
TGGT1_282055:E035	TGGT1_282055	E035	0.105560817481036	5.93119083955003e-08	5.57133142467611e-06	9.40826889237355	2.18753445382189
TGGT1_319860:E024	TGGT1_319860	E024	0.0702341089436808	6.03837768061479e-08	5.66508944866177e-06	70.2872942341268	1.2970788082206
TGGT1_241880:E012	TGGT1_241880	E012	0.0654962110023152	6.0579597625776e-08	5.67652993020945e-06	15.1664247080572	1.73976611574918
TGGT1_243590:E009	TGGT1_243590	E009	0.0404474195272532	6.30252656896838e-08	5.89850467697714e-06	24.5669046714178	1.25449093011957
TGGT1_255650:E006	TGGT1_255650	E006	0.0123588707035119	6.41887578625192e-08	6.00008708988125e-06	80.5575990335876	0.610076369050221
TGGT1_292960:E022	TGGT1_292960	E022	0.00326857524356162	6.46012161340878e-08	6.03130454932552e-06	306.989537047487	-0.295862220154853
TGGT1_270450:E015	TGGT1_270450	E015	0.0163636044885595	6.58681573870862e-08	6.14212573926158e-06	60.8007150705747	-0.688087908782643
TGGT1_257350:E014	TGGT1_257350	E014	0.0237325071203269	6.76852541461155e-08	6.30391742160616e-06	41.8946943962908	0.890766719347289
TGGT1_261790:E011	TGGT1_261790	E011	0.00194127135295796	6.81006669967564e-08	6.33492851093192e-06	520.687756590593	-0.135178129160685
TGGT1_240910:E026	TGGT1_240910	E026	0.0293651337831503	6.83327519812311e-08	6.34883151630212e-06	33.8492709127337	1.05193778161285
TGGT1_219260A:E021	TGGT1_219260A	E021	0.0750356608121529	7.14229761850234e-08	6.62793142648387e-06	13.2373959703944	2.0928476084547
No_genes_on_ref_contig_268+No_genes_on_ref_contig_269+No_genes_on_ref_contig_272+No_genes_on_ref_contig_271+No_genes_on_ref_contig_270:E004	No_genes_on_ref_contig_268+No_genes_on_ref_contig_269+No_genes_on_ref_contig_272+No_genes_on_ref_contig_271+No_genes_on_ref_contig_270	E004	0.000234804870901586	7.16416935808399e-08	6.64020845557418e-06	4957.1495763202	0.0549077042264442
TGGT1_235500:E001	TGGT1_235500	E001	0.00682639909827789	7.25857653023846e-08	6.71151919198475e-06	146.177572283202	0.37373834153346
TGGT1_273140:E005	TGGT1_273140	E005	0.0332523817905564	7.25307288856498e-08	6.71151919198475e-06	31.1117625484483	1.06723916311845
TGGT1_217020:E028	TGGT1_217020	E028	0.0030584538732881	7.35805866044042e-08	6.79532636168582e-06	328.321074359043	-0.300874117497761
TGGT1_273905:E017	TGGT1_273905	E017	0.0862001731924653	7.4666895486962e-08	6.88737124673673e-06	11.5222220763563	2.16943525349435
TGGT1_255190:E007	TGGT1_255190	E007	0.0543019107307113	7.61276878122501e-08	7.01369682065931e-06	18.2949614597095	-1.46239649698067
TGGT1_257150:E007	TGGT1_257150	E007	0.00724605492999062	7.85943198125159e-08	7.23227754662788e-06	137.671157272186	0.456982199209535
TGGT1_210980:E005	TGGT1_210980	E005	0.0188253854730364	8.04739071598223e-08	7.39637990961635e-06	52.8352448111671	0.765766050993693
TGGT1_319860:E013	TGGT1_319860	E013	0.0739634389272349	8.52384886210799e-08	7.82493399065462e-06	13.4293834460577	1.78962642929581
TGGT1_219850:E022	TGGT1_219850	E022	0.0395811981755712	8.67204095221755e-08	7.95147506736921e-06	25.1050125676079	1.1707654390037
TGGT1_297170:E011	TGGT1_297170	E011	0.0443965328262448	8.79372877509816e-08	8.05344145282738e-06	22.3799547649432	1.36682733957098
TGGT1_256830:E009	TGGT1_256830	E009	0.0364587473972422	8.93961192947011e-08	8.1772971645797e-06	27.2571289287413	1.15528804044666
TGGT1_232370:E006	TGGT1_232370	E006	0.0222809243027506	9.10596854446882e-08	8.31956367480798e-06	44.6283330560926	-0.846552592660202
TGGT1_207100:E003	TGGT1_207100	E003	0.054255102789362	9.62322635899986e-08	8.77129114764498e-06	18.8988164791661	1.76426341135914
TGGT1_300100:E004	TGGT1_300100	E004	0.0343847456030511	9.61184226812967e-08	8.77129114764498e-06	28.9028631479911	1.08446983413969
TGGT1_288860:E024	TGGT1_288860	E024	0.0300989755128195	9.70777925247583e-08	8.83787481543229e-06	33.0230456972209	1.03083774260031
TGGT1_297500:E004	TGGT1_297500	E004	0.04017402459812	9.90418984145481e-08	9.00601461358418e-06	24.7342327932378	1.18467918316875
TGGT1_246020:E010	TGGT1_246020	E010	0.00782105962177792	9.92035407696766e-08	9.01005019163078e-06	145.109092373778	0.452387986774878
TGGT1_261780:E017	TGGT1_261780	E017	0.0032306152753478	1.00276589974121e-07	9.09675601398059e-06	310.635651597833	-0.302204943576347
TGGT1_250220:E007	TGGT1_250220	E007	0.00401070498654719	1.03380521215598e-07	9.3672748922676e-06	249.691819505115	0.338081731234312
TGGT1_206400:E013	TGGT1_206400	E013	0.0505423946483785	1.03993613476067e-07	9.41172824341644e-06	25.3672457651853	1.30229296067925
TGGT1_277270:E005	TGGT1_277270	E005	0.0168279450987735	1.06199260992132e-07	9.60003837276759e-06	185.230490009011	0.612888124284063
TGGT1_255260:E018	TGGT1_255260	E018	0.0132462949352689	1.08955841296477e-07	9.8376497975293e-06	75.146608447389	-0.647947214673299
TGGT1_229780:E015	TGGT1_229780	E015	0.0258967833706839	1.09966832627933e-07	9.91727877773765e-06	38.3887480455603	0.901742405505333
TGGT1_208740:E015	TGGT1_208740	E015	0.020057779917608	1.12979796328132e-07	1.01770558153162e-05	49.5833329299332	0.959511409863153
TGGT1_250780:E009	TGGT1_250780	E009	0.0274795230429366	1.13675626568407e-07	1.0227744869598e-05	36.1748876800003	0.926735956527119
TGGT1_255260:E016	TGGT1_255260	E016	0.00489844556432867	1.14168087506484e-07	1.0260038993843e-05	204.119213097203	-0.384929433087544
TGGT1_228490:E013	TGGT1_228490	E013	0.0428005768565859	1.14370768484615e-07	1.02662461893135e-05	23.2151364205406	1.24661637241173
TGGT1_254420:E011	TGGT1_254420	E011	0.0167411308451565	1.15193866368161e-07	1.03280643058698e-05	59.4267752069449	0.717714306145049
TGGT1_290910:E004	TGGT1_290910	E004	0.0399157857705326	1.167714572207e-07	1.04573058956491e-05	24.8943917018289	1.20508742577181
TGGT1_242090:E004	TGGT1_242090	E004	0.00471445509130642	1.1704902626355e-07	1.04699604551949e-05	212.144116429464	-0.371865965761516
TGGT1_293230:E006	TGGT1_293230	E006	0.0235431871579065	1.21883343345457e-07	1.08897098286452e-05	42.2320807497912	0.860617653250952
TGGT1_306350:E005	TGGT1_306350	E005	0.0178336404366888	1.22196421264643e-07	1.09050016500713e-05	55.7791602270616	0.758206969371575
TGGT1_255195:E002	TGGT1_255195	E002	0.0161592422046678	1.22621199110399e-07	1.09302147053895e-05	61.571294328095	-0.700104868549351
TGGT1_313860:E008	TGGT1_313860	E008	0.0460468019741105	1.23058898210353e-07	1.09565197703232e-05	21.577278807366	1.25150282440408
TGGT1_311240:E002	TGGT1_311240	E002	0.00687262406658345	1.24867722908197e-07	1.11047004920106e-05	206.071052654306	0.417520837870681
TGGT1_249820:E014	TGGT1_249820	E014	0.136772042631784	1.25884913205235e-07	1.1182218584914e-05	7.26077051228249	13.6712530203071
TGGT1_311920:E012	TGGT1_311920	E012	0.10460790113043	1.26474520248702e-07	1.12216197602188e-05	9.49400097397598	2.81476101522076
TGGT1_244290:E028	TGGT1_244290	E028	0.0104560826868245	1.27819446532869e-07	1.13278694501108e-05	95.265959472059	-0.547252181713447
TGGT1_278040:E002	TGGT1_278040	E002	0.0112303722059805	1.28720949629957e-07	1.13946216667247e-05	88.6774959711048	0.542828954723832
TGGT1_273070:E019	TGGT1_273070	E019	0.0224644417472867	1.2911910685977e-07	1.14167144002119e-05	52.7990690737801	0.817345762397133
TGGT1_244520:E020	TGGT1_244520	E020	0.0280004877059852	1.29552818233286e-07	1.14418964305643e-05	35.5010028567089	-0.956418204709301
TGGT1_319530:E017	TGGT1_319530	E017	0.0196619293917719	1.29761743426692e-07	1.14471906770112e-05	71.1804918086288	-0.734936608170934
TGGT1_228350:E008	TGGT1_228350	E008	0.0682543069955733	1.30707126139688e-07	1.15173663431137e-05	18.5017195950482	1.74972488183442
TGGT1_294270:E011	TGGT1_294270	E011	0.045167009123718	1.39642842665086e-07	1.2290649601211e-05	21.9978968120093	1.34977935066586
TGGT1_290880:E009	TGGT1_290880	E009	0.0601899872306299	1.40293011705283e-07	1.23337461560628e-05	16.5042324426948	1.49978451619915
TGGT1_217020:E032	TGGT1_217020	E032	0.00241546913341152	1.43214738732891e-07	1.25475380615954e-05	416.98564804138	-0.255878023960688
TGGT1_217182:E012	TGGT1_217182	E012	0.0156745852078356	1.43074014740484e-07	1.25475380615954e-05	113.607322213748	0.628199028375501
TGGT1_309220:E012	TGGT1_309220	E012	0.00992439268982375	1.43117467061104e-07	1.25475380615954e-05	100.387560362033	-0.536706409057492
TGGT1_268960:E010	TGGT1_268960	E010	0.0102889127879696	1.43514740741756e-07	1.25595012919981e-05	96.8190117231646	0.542845053543478
TGGT1_248670:E009	TGGT1_248670	E009	0.00541989525134575	1.45332962333364e-07	1.27041511112727e-05	331.811112771337	-0.358693366637466
TGGT1_278470:E014	TGGT1_278470	E014	0.0125161811443195	1.45799486370165e-07	1.27304490161641e-05	79.542305008218	0.592087357779615
TGGT1_223810:E018	TGGT1_223810	E018	0.0237144270508371	1.46099968974842e-07	1.27422058071736e-05	55.3527255520573	-0.815526684409449
TGGT1_277070:E014	TGGT1_277070	E014	0.0712558465583206	1.5108558731728e-07	1.31620898783422e-05	13.9399229177859	1.76506809410655
TGGT1_311240:E005	TGGT1_311240	E005	0.0176277164992501	1.5149606714155e-07	1.31829029569142e-05	56.432041426994	0.724358206831311
TGGT1_208040:E017	TGGT1_208040	E017	0.0277584004366193	1.51949596768623e-07	1.32074108222972e-05	35.8110006673323	0.945273522035384
TGGT1_294270:E002	TGGT1_294270	E002	0.0344801938751418	1.52285348764553e-07	1.32216376757311e-05	28.8227738828888	1.08909218216947
TGGT1_220940:E004	TGGT1_220940	E004	0.0373545479467045	1.63817963649415e-07	1.42068632877315e-05	26.6028702006314	1.15591810156432
TGGT1_278470:E012	TGGT1_278470	E012	0.0138646927467699	1.64165884347988e-07	1.42209854065911e-05	71.7865265317237	0.631523500649917
TGGT1_289190:E022	TGGT1_289190	E022	0.0625846731674603	1.67354566371123e-07	1.448088154984e-05	15.8723801741913	1.70099467695105
TGGT1_202680:E010	TGGT1_202680	E010	0.0079647732107621	1.67613540406421e-07	1.44869759327426e-05	125.194023059106	0.474251661181174
TGGT1_208040:E016	TGGT1_208040	E016	0.0321360218222245	1.73036589646818e-07	1.49388903805534e-05	30.9275212207624	1.02205787914758
TGGT1_227650:E003	TGGT1_227650	E003	0.0166598590094354	1.7407820158035e-07	1.50119492422327e-05	59.7172790226884	0.676518282757828
TGGT1_257300:E018	TGGT1_257300	E018	0.0247841439468153	1.79142873469086e-07	1.54313912205652e-05	40.1145456727068	0.839236459232832
TGGT1_227620:E001	TGGT1_227620	E001	0.00013455840131724	1.82066425477279e-07	1.56656639802886e-05	67288.3811430278	0.0134264996241314
TGGT1_250750:E010	TGGT1_250750	E010	0.0222329242819445	1.83211855271392e-07	1.57465876101655e-05	44.7248337469797	0.824491004640154
TGGT1_211350:E011	TGGT1_211350	E011	0.00893629910089468	1.87440854105242e-07	1.60920591138374e-05	111.530541316462	0.493691522858422
TGGT1_304955:E019	TGGT1_304955	E019	0.00508519523624425	1.89623918410042e-07	1.62613091728487e-05	196.57185986574	0.417540562270327
TGGT1_257180:E024	TGGT1_257180	E024	0.0769950539608037	1.90358579982797e-07	1.6306111716988e-05	12.900375641231	1.96837081313406
TGGT1_258400:E003	TGGT1_258400	E003	0.00733056959702616	1.90724107844143e-07	1.63192297042544e-05	216.430703913125	0.400116483768856
TGGT1_221590:E010	TGGT1_221590	E010	0.00883052825785577	1.91207511845112e-07	1.63423933121723e-05	112.871682101387	-0.510682968449822
TGGT1_312490:E007	TGGT1_312490	E007	0.0201846584463418	1.94803384603588e-07	1.66312307364288e-05	49.2711235744202	0.778396062831171
TGGT1_273360:E015	TGGT1_273360	E015	0.048372469074545	2.01756346918251e-07	1.72057185662127e-05	20.5391385247315	1.29999209555456
TGGT1_206540:E011	TGGT1_206540	E011	0.000708439917540877	2.03786255275856e-07	1.73595615261984e-05	1473.2112050358	-0.0975724763529513
TGGT1_285150:E016	TGGT1_285150	E016	0.0367679250280624	2.07575509901737e-07	1.76627679449831e-05	27.0277111665752	1.03918713832527
TGGT1_231170:E004	TGGT1_231170	E004	0.0915859104033377	2.08731516224606e-07	1.77240470223564e-05	10.9873894752178	2.06472242301258
TGGT1_250330:E012	TGGT1_250330	E012	0.0163045102285681	2.08757012314803e-07	1.77240470223564e-05	61.0215495153436	0.679319586667182
TGGT1_203170:E020	TGGT1_203170	E020	0.0139796634113772	2.10159932674218e-07	1.78185200582734e-05	71.1946826842304	0.625818871711647
TGGT1_209250:E009	TGGT1_209250	E009	0.0212504820761737	2.10333533230787e-07	1.78185200582734e-05	81.9053563292361	0.751560919348608
TGGT1_263980:E014	TGGT1_263980	E014	0.0334621987192155	2.20435513429734e-07	1.86362571555523e-05	29.7005329517248	1.07276736506489
TGGT1_290270:E010	TGGT1_290270	E010	0.00768593104757921	2.20471358257051e-07	1.86362571555523e-05	129.756500821228	0.43133917986201
TGGT1_214490:E011	TGGT1_214490	E011	0.0638310108444876	2.22621549767359e-07	1.87973318895325e-05	15.5622949865935	1.49255712246707
TGGT1_255650:E016	TGGT1_255650	E016	0.00384285808959988	2.28179444922345e-07	1.92454709215129e-05	332.941404186575	-0.290407947384469
TGGT1_200350:E018	TGGT1_200350	E018	0.00452276244956104	2.29982479118446e-07	1.93762760395e-05	221.204791597702	0.338583254315966
TGGT1_305290:E006	TGGT1_305290	E006	0.0277783167592215	2.33140591945399e-07	1.96208364329777e-05	35.7852931708438	0.922362342739354
TGGT1_268280:E010	TGGT1_268280	E010	0.00242903418144933	2.34657836619854e-07	1.97269192476583e-05	414.623398100065	-0.24282368878217
TGGT1_310100:E002	TGGT1_310100	E002	0.00909258483502367	2.38540105907344e-07	2.00313728061231e-05	109.606218460459	-0.472679874211265
TGGT1_210840:E002	TGGT1_210840	E002	0.0833033723496557	2.4257071225647e-07	2.03476046044218e-05	11.9230632490768	1.86647668049879
TGGT1_319530:E013	TGGT1_319530	E013	0.0171979944461199	2.43436223419297e-07	2.03979379486025e-05	57.8449312904705	0.711482415943724
TGGT1_211440:E014	TGGT1_211440	E014	0.0335879621425666	2.46482680612554e-07	2.06307077671316e-05	29.5892108052575	1.06623120565911
TGGT1_240710:E008	TGGT1_240710	E008	0.00298323052107374	2.53808240690176e-07	2.1197678032512e-05	336.69675225531	0.267680623857035
TGGT1_250100:E005	TGGT1_250100	E005	0.0142741489296458	2.53577088802101e-07	2.1197678032512e-05	640.551414883853	0.519432228161631
TGGT1_320670:E017	TGGT1_320670	E017	0.0236235091166412	2.54096672979741e-07	2.11987253656291e-05	42.0882778899877	0.867997917208341
TGGT1_313120:E015	TGGT1_313120	E015	0.0243723778370112	2.56121360116634e-07	2.13444652356636e-05	40.7932337308401	0.867293101661333
TGGT1_266640:E032	TGGT1_266640	E032	0.00552681880665114	2.58577653478928e-07	2.15025229008229e-05	180.765939461586	-0.389602784557674
TGGT1_270530:E023	TGGT1_270530	E023	0.0342264065782738	2.58409831787522e-07	2.15025229008229e-05	29.0367092800667	1.02748999823323
TGGT1_206550:E027	TGGT1_206550	E027	0.0374537694083258	2.59232029161298e-07	2.15336339726126e-05	26.5323296092506	1.60883619822309
TGGT1_294360:E004	TGGT1_294360	E004	0.0218611387410922	2.60551679166242e-07	2.16198805314218e-05	45.4866581107116	0.788801129349018
TGGT1_259690:E009	TGGT1_259690	E009	0.00972766064310786	2.63741140171276e-07	2.18609255526865e-05	102.425027898846	0.487805394119439
TGGT1_277030:E030	TGGT1_277030	E030	0.0900866459875986	2.66414358793028e-07	2.20587069898491e-05	11.0249455891274	2.11881403416763
TGGT1_244300:E010	TGGT1_244300	E010	0.0232739606863933	2.7561878036869e-07	2.27962542811507e-05	42.7213350499099	-0.812187151730869
TGGT1_258870A:E005	TGGT1_258870A	E005	0.00574456620631848	2.76498665479471e-07	2.28444386660711e-05	173.872589935755	0.396079678025287
TGGT1_216240:E002	TGGT1_216240	E002	0.0295475010793229	2.77477245981643e-07	2.28760935080381e-05	40.7922000956794	0.907898347252695
TGGT1_280370:E002	TGGT1_280370	E002	0.00404525226740448	2.77309844779697e-07	2.28760935080381e-05	247.541044403063	-0.333310904622153
TGGT1_288860:E026	TGGT1_288860	E026	0.0351005118365595	2.80012656102127e-07	2.30603777673303e-05	28.3128984823333	1.0839812659668
TGGT1_223855:E014	TGGT1_223855	E014	0.0153089761774397	2.83098910186655e-07	2.32895834711049e-05	68.5878467824554	0.612253672922812
TGGT1_278640:E019	TGGT1_278640	E019	0.0424105446243039	2.85797840616677e-07	2.34864691758969e-05	23.4288103676213	1.17547589174378
TGGT1_309090:E010	TGGT1_309090	E010	0.0271100121874795	2.86350830774901e-07	2.35067722053965e-05	36.6685819708882	0.850739778262743
TGGT1_219070:E038	TGGT1_219070	E038	0.015969548368901	2.92921768427175e-07	2.40205228608739e-05	62.3042518117305	-0.676015396209011
TGGT1_217020:E004	TGGT1_217020	E004	0.0368897216715242	2.94663987441323e-07	2.41376298539754e-05	55.636092449245	0.921210197090315
TGGT1_299200:E006	TGGT1_299200	E006	0.0146266029334651	2.9506672813994e-07	2.41448798616492e-05	97.7571369728007	0.568122710372726
TGGT1_230010:E008	TGGT1_230010	E008	0.0698785997756915	2.97063323046956e-07	2.4256593573814e-05	14.2148025537999	1.67254613861876
TGGT1_250720:E027	TGGT1_250720	E027	0.00355307629461539	2.96975349103269e-07	2.4256593573814e-05	282.167152404082	-0.324246189087612
TGGT1_289570:E019	TGGT1_289570	E019	0.0333487112243488	2.98631102076074e-07	2.43587239811246e-05	38.7527658070484	0.99260425205436
TGGT1_226910:E022	TGGT1_226910	E022	0.00949679379093783	3.06972836500816e-07	2.50125894360691e-05	104.924063072708	0.503946029351863
TGGT1_278580:E001	TGGT1_278580	E001	0.0170921443323456	3.10935829289379e-07	2.530866135075e-05	58.2038848033124	0.354545575216355
TGGT1_226500:E006	TGGT1_226500	E006	0.0124393559726177	3.14297758244928e-07	2.55552347621858e-05	80.034923650794	-0.573258811167232
TGGT1_263100:E001	TGGT1_263100	E001	0.00661009801926824	3.14698702255796e-07	2.55607866651465e-05	150.98602990822	-0.417761757424096
TGGT1_285240:E013	TGGT1_285240	E013	0.0366484216257531	3.18194286365262e-07	2.58174175094484e-05	49.4115659526321	0.950153960586466
TGGT1_312905:E022	TGGT1_312905	E022	0.00724703912052542	3.19030126021529e-07	2.5857930161515e-05	217.249430389208	-0.403035443809506
TGGT1_202200:E006	TGGT1_202200	E006	0.0111847119809281	3.29056165768005e-07	2.66421429361632e-05	89.0406319660135	0.551278544951023
TGGT1_258030:E053	TGGT1_258030	E053	0.0308511007572827	3.29399062812903e-07	2.66421429361632e-05	32.2170682222018	0.94265920278056
TGGT1_206540:E002	TGGT1_206540	E002	0.025911242264876	3.32646118591124e-07	2.68764771968309e-05	163.878795244009	0.729156009946732
TGGT1_233430:E018	TGGT1_233430	E018	0.0606708911814272	3.38910714968324e-07	2.73538682836356e-05	16.3733382117014	1.80091459707182
TGGT1_291350:E004	TGGT1_291350	E004	0.0184999008058268	3.50664745243195e-07	2.82728510285954e-05	53.7665587358077	-0.700577579675955
TGGT1_319870:E009	TGGT1_319870	E009	0.0116602244086998	3.56909315689426e-07	2.87461646641807e-05	85.3987069704521	-0.568652079559966
TGGT1_230220:E012	TGGT1_230220	E012	0.0625863772742316	3.63463456952773e-07	2.92433943894034e-05	15.8719477612517	1.44436938403754
TGGT1_240840:E005	TGGT1_240840	E005	0.047727466851781	3.68487938869338e-07	2.96166399151708e-05	21.0861735506946	1.23338511561621
TGGT1_219850:E023	TGGT1_219850	E023	0.0767438109103772	3.69387783819975e-07	2.96579405907789e-05	12.9426277580158	1.66805596927095
TGGT1_231210:E013	TGGT1_231210	E013	0.0252048560929023	3.71367207489767e-07	2.97857433422664e-05	42.3385192127121	0.834543842203985
TGGT1_237530:E007	TGGT1_237530	E007	0.130655308806497	3.73949645710006e-07	2.99615942934513e-05	7.60077919334379	14.7028464297896
TGGT1_256970:E017	TGGT1_256970	E017	0.0253425337852101	3.78331876128675e-07	3.02811316313531e-05	45.0642614280069	0.843645384010314
TGGT1_218800:E007	TGGT1_218800	E007	0.0505260012717487	3.8085053351198e-07	3.04510015020396e-05	19.6631155017042	1.35315947029108
TGGT1_200400:E029	TGGT1_200400	E029	0.0113735555203176	3.8150571453778e-07	3.04716783658414e-05	87.5577232355713	0.552840326741798
TGGT1_200350:E009	TGGT1_200350	E009	0.00195878080000831	3.91404614429759e-07	3.12298612242362e-05	1145.31517223575	-0.186915843957355
TGGT1_233760:E005	TGGT1_233760	E005	0.042818630775997	3.9433554313134e-07	3.14310789705215e-05	23.2053401611684	1.15631692710574
TGGT1_260210:E014	TGGT1_260210	E014	0.0637977049848088	4.00230258488282e-07	3.18678677424499e-05	15.5704237469406	1.53446651952075
TGGT1_205320:E002	TGGT1_205320	E002	0.0116704033216203	4.0156685340179e-07	3.18702505908405e-05	85.3240013108841	-0.555799221983348
TGGT1_226680:E006	TGGT1_226680	E006	0.0124763779881157	4.02748849170401e-07	3.18702505908405e-05	79.7967714986735	0.577725453082072
TGGT1_228350:E009	TGGT1_228350	E009	0.122577347092884	4.02448907459065e-07	3.18702505908405e-05	8.10181876481728	13.237034922304
TGGT1_285830:E009	TGGT1_285830	E009	0.00463884793252712	4.0184464599276e-07	3.18702505908405e-05	215.627714865025	-0.338813079214227
TGGT1_300350:E010	TGGT1_300350	E010	0.00597054354771271	4.01642297823825e-07	3.18702505908405e-05	167.253462651823	0.37891239443011
TGGT1_320080:E022	TGGT1_320080	E022	0.0264095819402369	4.02239953121937e-07	3.18702505908405e-05	57.2280303812419	0.81125761526447
TGGT1_209200:E014	TGGT1_209200	E014	0.0226753874065377	4.04358172546971e-07	3.19646799423782e-05	43.8507906607623	0.799524863233974
TGGT1_239700:E042	TGGT1_239700	E042	0.0432941813368774	4.15501139377323e-07	3.28117790815369e-05	22.9502453837986	1.13475001638435
TGGT1_253020:E013	TGGT1_253020	E013	0.0173355693681738	4.19991646787153e-07	3.31323389776022e-05	57.3849583827278	0.701649124753846
TGGT1_222660:E007	TGGT1_222660	E007	0.117397173796776	4.22277671553531e-07	3.32785122555473e-05	8.45941826915754	2.8059932720242
TGGT1_261022:E076	TGGT1_261022	E076	0.00410096304668807	4.23304621642124e-07	3.33252635380286e-05	244.149697321059	0.333664197071427
TGGT1_288440:E003	TGGT1_288440	E003	0.0184818282995485	4.23986476673833e-07	3.3344778821072e-05	53.8192329087407	-0.727283928955815
TGGT1_208040:E015	TGGT1_208040	E015	0.033526948848984	4.26309968746118e-07	3.34932301314371e-05	29.643113597934	1.0086252215564
TGGT1_271145:E045	TGGT1_271145	E045	0.125914492931017	4.29460705709772e-07	3.3706304642106e-05	11.0592471758476	15.3447325032088
TGGT1_278640:E017	TGGT1_278640	E017	0.119549397218348	4.34153948406904e-07	3.40398846262666e-05	8.3070810937236	2.76356368567094
TGGT1_235020:E027	TGGT1_235020	E027	0.0436690756677676	4.37343865427531e-07	3.42550362771205e-05	22.7530640983881	1.16820683661387
TGGT1_294180:E009	TGGT1_294180	E009	0.0185683323984122	4.39766842642918e-07	3.44097402119694e-05	53.5680387520599	0.714798356853662
TGGT1_202160:E012	TGGT1_202160	E012	0.0318872545947422	4.4207402006679e-07	3.45550778025147e-05	31.1690626423264	1.04891150759509
TGGT1_222840:E022	TGGT1_222840	E022	0.0039869670271936	4.44068616241658e-07	3.46757116526019e-05	251.191442643582	-0.319748643369187
TGGT1_267720:E013	TGGT1_267720	E013	0.0318259046237115	4.48618153589095e-07	3.49954041292643e-05	31.2292116853348	0.963720708581891
TGGT1_230690:E017	TGGT1_230690	E017	0.0019571715842863	4.68013229602106e-07	3.64713311591653e-05	516.381685101254	-0.190858412774261
TGGT1_203350:E014	TGGT1_203350	E014	0.0510521624306935	4.68802231441924e-07	3.64958024896688e-05	19.4603235250243	1.25704853963207
TGGT1_242790B:E027	TGGT1_242790B	E027	0.0288541802708732	4.70499103207445e-07	3.65908295477231e-05	34.4493961883563	0.886864966110902
TGGT1_271430:E026	TGGT1_271430	E026	0.0097141715175953	4.80079186697876e-07	3.72981238304395e-05	102.567762861693	0.498647831756145
TGGT1_255215:E003	TGGT1_255215	E003	0.00216193069160837	4.86617058704255e-07	3.77678736764231e-05	466.680855302793	0.147612558275044
TGGT1_208200:E008	TGGT1_208200	E008	0.0902112977841801	4.893873929826e-07	3.79063095913347e-05	11.0097057526939	1.96966208359188
TGGT1_305520:E009	TGGT1_305520	E009	0.02119875597397	4.8904026556272e-07	3.79063095913347e-05	122.539070846198	-0.676315347008358
TGGT1_278060:E014	TGGT1_278060	E014	0.0210051155574029	4.91715781798028e-07	3.80483036515761e-05	88.7779537257111	0.700765075843707
TGGT1_255195:E001	TGGT1_255195	E001	0.0121269925319568	5.05052532752818e-07	3.90409672627045e-05	82.1023249509493	-0.555302571375307
TGGT1_357600:E004	TGGT1_357600	E004	0.00770237611090985	5.05883560995265e-07	3.90659046996916e-05	129.478215066267	-0.346042703315682
TGGT1_223880:E020	TGGT1_223880	E020	0.0338015210690243	5.11813902175014e-07	3.94445785370327e-05	29.4020742299926	-1.02787945004153
TGGT1_263100:E015	TGGT1_263100	E015	0.0254738721392127	5.11765459126147e-07	3.94445785370327e-05	39.0269339355022	0.881862560072892
TGGT1_237530:E004	TGGT1_237530	E004	0.0450510137707558	5.17342534482527e-07	3.9830709741517e-05	22.0545794597825	1.26561089474397
TGGT1_297150:E002	TGGT1_297150	E002	0.00707031043909732	5.20061840059929e-07	3.9999991596281e-05	141.109998030869	0.367465357429751
TGGT1_206695:E003	TGGT1_206695	E003	0.0143086301543705	5.26136198278887e-07	4.04267270671549e-05	78.2323502756259	-0.584435458842219
TGGT1_263730:E007	TGGT1_263730	E007	0.0196953068823814	5.26940708337483e-07	4.04480951114157e-05	50.4974685343668	0.744274037376828
TGGT1_266640:E035	TGGT1_266640	E035	0.0164420773718406	5.34762844006775e-07	4.10075575298888e-05	60.5099217112384	-0.678405758985054
TGGT1_310610:E004	TGGT1_310610	E004	0.0112854155842736	5.42108090239295e-07	4.15293712160685e-05	88.2436539827961	0.519035023624625
TGGT1_241300:E015	TGGT1_241300	E015	0.0128395322874765	5.44557292299457e-07	4.16754468808898e-05	77.5337083960808	0.587278821320991
TGGT1_203450:E012	TGGT1_203450	E012	0.013242547651677	5.45649055685538e-07	4.16759806080613e-05	75.1679284927627	0.578986322254748
TGGT1_240970:E014	TGGT1_240970	E014	0.0115039431260455	5.45595941563571e-07	4.16759806080613e-05	86.5623421904496	0.52978404850417
TGGT1_249790:E009	TGGT1_249790	E009	0.0109265543030677	5.49932165866056e-07	4.19614079728402e-05	91.1510304138767	0.520940035498318
TGGT1_225150:E013	TGGT1_225150	E013	0.0109223270407775	5.61569144774183e-07	4.28068337073551e-05	230.471179373616	-0.477116626262789
TGGT1_261470:E005	TGGT1_261470	E005	0.0143631585651984	5.63484368014191e-07	4.29102560803829e-05	69.2892103503545	-0.592282082090964
TGGT1_263100:E002	TGGT1_263100	E002	0.00502739546596881	5.80991735450567e-07	4.41996653235794e-05	198.847466110672	-0.352764974543411
TGGT1_280390:E030	TGGT1_280390	E030	0.155399258805213	5.88744528774726e-07	4.47451665256811e-05	6.39025158451157	14.2514156883696
TGGT1_297530:E021	TGGT1_297530	E021	0.113048625356948	5.93079706002605e-07	4.50301041206741e-05	8.78491915655404	2.35211960693397
TGGT1_263100:E003	TGGT1_263100	E003	0.00536173620013341	5.9530837447301e-07	4.51546984890253e-05	186.36761518878	-0.367228943601925
TGGT1_201860:E002	TGGT1_201860	E002	0.0046955817516195	6.15442238693481e-07	4.66358336237584e-05	213.003120676488	-0.352328441566183
TGGT1_214280:E005	TGGT1_214280	E005	0.030057651630972	6.16957009267712e-07	4.67045573606928e-05	33.0684986719504	0.916699164739419
TGGT1_257370:E003	TGGT1_257370	E003	0.02549201280214	6.24353693497497e-07	4.72179771134519e-05	39.7116023680201	0.844454191715362
TGGT1_319590:E009	TGGT1_319590	E009	0.0484741500494272	6.2849206928616e-07	4.74842134982701e-05	20.4960242437087	1.28393832126383
TGGT1_309940:E013	TGGT1_309940	E013	0.0492934352736762	6.38881260415898e-07	4.82217282972263e-05	20.1551297830702	1.23736278998121
TGGT1_211850:E007	TGGT1_211850	E007	0.0226157172885835	6.43502685087542e-07	4.85228810736717e-05	165.3849518818	-0.605397367637322
TGGT1_263100:E028	TGGT1_263100	E028	0.00638165977051606	6.48390066911562e-07	4.88434780110625e-05	156.420132508218	0.404961592653128
TGGT1_313775:E002	TGGT1_313775	E002	0.0459708961540383	6.4905137569842e-07	4.88454070073844e-05	21.6129333657027	1.34176811358068
TGGT1_262390:E024	TGGT1_262390	E024	0.0544514767014581	6.51732297655632e-07	4.89991727543697e-05	18.2446774294586	1.33823717276119
TGGT1_236050:E005	TGGT1_236050	E005	0.00201859042096328	6.55251893748965e-07	4.92156302639191e-05	500.396549679399	-0.124069084108931
TGGT1_246740:E005	TGGT1_246740	E005	0.0310362567350637	6.62804533950127e-07	4.96857677806106e-05	32.0246537234467	0.915342036601671
TGGT1_320440B:E008	TGGT1_320440B	E008	0.053820116118748	6.62615189071422e-07	4.96857677806106e-05	18.4588420379949	1.41661902432972
TGGT1_275750:E006	TGGT1_275750	E006	0.00141778795654241	6.78558990851543e-07	5.08153728912078e-05	1548.2877270554	-0.0865635733524471
TGGT1_314970:E007	TGGT1_314970	E007	0.0152500982419738	6.79196063865981e-07	5.08153728912078e-05	65.2502335173059	0.646273841705471
TGGT1_214240:E009	TGGT1_214240	E009	0.014871528134263	6.89191393832683e-07	5.15130341711302e-05	66.9151106410941	0.649584884285153
TGGT1_289570:E016	TGGT1_289570	E016	0.0316215224156952	6.90008946910371e-07	5.15240208491274e-05	31.4312788541284	0.978125699747497
TGGT1_284050:E030	TGGT1_284050	E030	0.0354781393372003	6.97294865882992e-07	5.20175200095646e-05	28.0112438926455	1.04026520649036
TGGT1_232150:E010	TGGT1_232150	E010	0.0156679828281793	7.09659434514712e-07	5.28885567117429e-05	90.8742179743256	0.622055923234348
TGGT1_242080:E011	TGGT1_242080	E011	0.00753811946602257	7.29111717258221e-07	5.42442062607215e-05	132.312544117655	0.414613673318397
TGGT1_276100:E003	TGGT1_276100	E003	0.0605826066591576	7.29261489481959e-07	5.42442062607215e-05	16.3972120040745	1.32398129959529
TGGT1_264780:E006	TGGT1_264780	E006	0.0478569466636423	7.31751150287297e-07	5.43767535151113e-05	20.7605490207249	1.18252785527506
TGGT1_203358:E009	TGGT1_203358	E009	0.0199654766826477	7.38503045307212e-07	5.48254671422901e-05	77.2305017384194	0.678501211889265
TGGT1_235140:E007	TGGT1_235140	E007	0.0127229470715943	7.55546374814898e-07	5.60365992293941e-05	78.2461124859375	-0.587319294260148
TGGT1_304955:E024	TGGT1_304955	E024	0.00165213693043191	7.57003862040971e-07	5.60905552050551e-05	1534.15213908139	-0.121022137985057
TGGT1_294960:E017	TGGT1_294960	E017	0.0424542815260248	7.69856507974556e-07	5.69879234135269e-05	23.4046540864825	1.14392854346529
TGGT1_249390:E035	TGGT1_249390	E035	0.0149315942453527	7.74813106704537e-07	5.7299629143269e-05	157.670494709425	0.562288678336027
TGGT1_289070:E017	TGGT1_289070	E017	0.0675702435754445	7.87940148781163e-07	5.82143819345176e-05	14.7006614157643	-1.53701111993904
TGGT1_202810:E002	TGGT1_202810	E002	0.0144091366267129	7.90276864113478e-07	5.8281453914106e-05	69.06758464328	0.526939262155052
TGGT1_319530:E015	TGGT1_319530	E015	0.0193121162779517	7.90364993147812e-07	5.8281453914106e-05	51.5012326827116	0.722581587412046
TGGT1_320640:E005	TGGT1_320640	E005	0.0248516044325695	7.9325608803491e-07	5.84385599581384e-05	99.4251650505527	0.711728375408321
TGGT1_224830:E001	TGGT1_224830	E001	0.00623266781609699	8.01913362477955e-07	5.90197481156309e-05	160.180184523256	-0.38584735649625
TGGT1_320670:E008	TGGT1_320670	E008	0.0769564671924381	8.17189168227579e-07	6.00864728412464e-05	12.9068469261374	1.76475553326574
TGGT1_277030:E035	TGGT1_277030	E035	0.0319324350985204	8.21801422336372e-07	6.03678354570362e-05	31.1249144857169	0.964578431217248
TGGT1_281545:E016	TGGT1_281545	E016	0.0837550977341939	8.25975443106852e-07	6.06164996389696e-05	11.8587307902413	1.9856846814847
TGGT1_316610:E015	TGGT1_316610	E015	0.0506955317461751	8.31685624675246e-07	6.09773171213472e-05	19.5973154420306	1.41953852467335
TGGT1_213410:E005	TGGT1_213410	E005	0.00782205346881066	8.39399090392786e-07	6.14841829442426e-05	127.488416921899	0.433648587461615
TGGT1_222010:E003	TGGT1_222010	E003	0.0150688927054931	8.43545384097767e-07	6.1729044455162e-05	66.0366785086058	0.605346079783169
TGGT1_211350:E005	TGGT1_211350	E005	0.0299301205365947	8.62297948975053e-07	6.30412821174084e-05	33.209564995577	-0.886936043964372
TGGT1_237140:E006	TGGT1_237140	E006	0.0105769585984975	8.65347167306489e-07	6.32040687208447e-05	94.1736728522359	0.496836077354879
TGGT1_301222:E012	TGGT1_301222	E012	0.00889008921749168	8.88797817776448e-07	6.48552306975204e-05	112.112527161117	0.448197492886065
TGGT1_313180:E017	TGGT1_313180	E017	0.021556095457837	8.92124287630483e-07	6.50361991353543e-05	46.1313786826295	0.762493796140918
TGGT1_313350:E008	TGGT1_313350	E008	0.0379597021590064	8.97862496435814e-07	6.53924745389939e-05	26.1783807201241	1.03030220832305
TGGT1_225170:E001	TGGT1_225170	E001	0.00620156211794697	9.16023213418213e-07	6.66519655770978e-05	160.988111567115	0.343928267993034
TGGT1_278490:E007	TGGT1_278490	E007	0.0305130432447094	9.21070147901149e-07	6.69557870901425e-05	32.5744091428021	0.900950801196914
TGGT1_255190:E023	TGGT1_255190	E023	0.0116744106965649	9.35535262586342e-07	6.79430273831255e-05	104.462773313595	0.541552849329263
TGGT1_304955:E018	TGGT1_304955	E018	0.00978483515433714	9.41044509561297e-07	6.82785996044961e-05	432.918559839736	0.455134658921026
TGGT1_240710:E009	TGGT1_240710	E009	0.00389045597375082	9.46100428507957e-07	6.8580677948364e-05	257.478574801126	0.295065543613729
TGGT1_291120:E010	TGGT1_291120	E010	0.107748286963757	9.73200324059072e-07	7.04785987744834e-05	16.4312412045538	1.82231790048247
TGGT1_216130:E008	TGGT1_216130	E008	0.0188592965260712	9.89799392682894e-07	7.16131976794496e-05	52.7400670960409	-0.709948529213784
TGGT1_245660:E003	TGGT1_245660	E003	0.00725434702405499	9.92100088289826e-07	7.17121302765055e-05	197.03678647583	-0.372888296000129
TGGT1_275750:E002	TGGT1_275750	E002	0.0150997579225846	9.98086788494291e-07	7.20770625634735e-05	65.9013844602864	0.633618442495544
TGGT1_243240:E013	TGGT1_243240	E013	0.0376112418032449	1.00099031693916e-06	7.22188666503799e-05	26.4211408257015	1.06259281937376
TGGT1_271145:E060	TGGT1_271145	E060	0.099800401057592	1.008146712513e-06	7.26669502339222e-05	15.5012290534871	2.21633365621042
TGGT1_301440:E008	TGGT1_301440	E008	0.0183926843617965	1.03157072779604e-06	7.42856607419532e-05	101.23933948149	0.642095140659427
TGGT1_267800:E007	TGGT1_267800	E007	0.0395080515070995	1.03895651083472e-06	7.47474732425165e-05	25.151533569673	1.03297545467629
TGGT1_310150:E006	TGGT1_310150	E006	0.0091857567927479	1.04486054601331e-06	7.51019174686856e-05	271.238027949819	0.413742656959384
TGGT1_267120:E003	TGGT1_267120	E003	0.00422734526179391	1.05638079438825e-06	7.58590010265513e-05	236.790408350233	-0.26535650661059
TGGT1_271610:E010	TGGT1_271610	E010	0.0215422722040515	1.06093030762093e-06	7.61145677373194e-05	46.1610278008856	-0.745474996252115
TGGT1_280660:E003	TGGT1_280660	E003	0.020634107181507	1.08562471817554e-06	7.78135694687069e-05	77.5559522226628	0.675635306772443
TGGT1_229030:E002	TGGT1_229030	E002	0.00405777465568439	1.08748208854261e-06	7.78740552072214e-05	333.776936851032	-0.29394618118273
TGGT1_275320:E039	TGGT1_275320	E039	0.00717282081496368	1.11611579695459e-06	7.98500833245808e-05	176.051707875778	0.400254931349575
TGGT1_310010:E002	TGGT1_310010	E002	0.0115561951986063	1.12408514192388e-06	8.03454233023303e-05	86.1697722320844	-0.542118246620843
TGGT1_207750:E022	TGGT1_207750	E022	0.035551195782044	1.13646458253513e-06	8.107941423236e-05	27.953625827079	1.01769430280302
TGGT1_227780:E008	TGGT1_227780	E008	0.105370874777428	1.13603007422778e-06	8.107941423236e-05	9.42523390041714	2.08961912404845
TGGT1_304955:E030	TGGT1_304955	E030	0.00177734339931723	1.13959231561697e-06	8.12271379917081e-05	569.66317142989	-0.160771945474057
TGGT1_314240:E017	TGGT1_314240	E017	0.05870821789522	1.14407949032821e-06	8.14713955499062e-05	16.9210370466712	1.404940293708
TGGT1_320060:E008	TGGT1_320060	E008	0.0323247813729029	1.14923034149243e-06	8.17624182863459e-05	30.7467278305829	-0.944905800363978
TGGT1_219280:E013	TGGT1_219280	E013	0.036452035280571	1.15877358961197e-06	8.23651122155549e-05	27.2621526941109	0.997116171088494
TGGT1_247040:E002	TGGT1_247040	E002	0.00678243212538563	1.16744871030271e-06	8.2905043025443e-05	147.130013501717	0.390089144267819
TGGT1_321540:E006	TGGT1_321540	E006	0.0436654364652383	1.17086661701089e-06	8.30709863815933e-05	22.7549619044319	1.12417551074796
TGGT1_258870A:E004	TGGT1_258870A	E004	0.000296079908651761	1.18570821918159e-06	8.40463675620443e-05	3795.82956085759	-0.0593119101161347
TGGT1_216680:E032	TGGT1_216680	E032	0.0082587220798512	1.20825923882195e-06	8.5565912565311e-05	309.497663170438	0.393542707287895
TGGT1_289570:E027	TGGT1_289570	E027	0.0739151135084533	1.2113732112721e-06	8.57074433098659e-05	22.8252366531483	1.48286747074718
TGGT1_280400:E013	TGGT1_280400	E013	0.0469339590742804	1.21517518860532e-06	8.5897346795646e-05	21.1691195988085	1.17686838092967
TGGT1_263595:E005	TGGT1_263595	E005	0.0156406579546123	1.24149876457889e-06	8.76311448102453e-05	63.6172785940658	0.614564413162504
TGGT1_271380:E004	TGGT1_271380	E004	0.0818792893954659	1.24198389705945e-06	8.76311448102453e-05	12.1305222253119	1.66096275604673
TGGT1_287160:E008	TGGT1_287160	E008	0.0167506275954314	1.26034761928442e-06	8.88452569017954e-05	59.3930136752847	0.653046804061506
TGGT1_208050:E025	TGGT1_208050	E025	0.0571158153466786	1.27365740481265e-06	8.97012044120894e-05	25.4419441573131	1.28234382536498
TGGT1_319540:E002	TGGT1_319540	E002	0.050081442870605	1.29102252879021e-06	9.08409322753233e-05	19.8377796663343	1.20266743865939
TGGT1_201150:E007	TGGT1_201150	E007	0.0395581565135334	1.31000769258631e-06	9.20920359886021e-05	25.1196483990236	1.06312906848056
TGGT1_233430:E021	TGGT1_233430	E021	0.0596623161589288	1.31140289974242e-06	9.20920359886021e-05	16.6502852442296	1.65233208061192
TGGT1_249535:E001	TGGT1_249535	E001	0.017762006012839	1.31239870645027e-06	9.20920359886021e-05	56.0045564856068	-0.196321207527173
TGGT1_233838:E008	TGGT1_233838	E008	0.133939367318061	1.3266319493385e-06	9.30058568351482e-05	7.41436768589033	13.1537054457735
TGGT1_212260:E006	TGGT1_212260	E006	0.00519735827956615	1.3352151956902e-06	9.34633624119262e-05	192.301317952263	0.333109446254032
TGGT1_281545:E017	TGGT1_281545	E017	0.0733587590512469	1.33559056090549e-06	9.34633624119262e-05	13.5401309767591	1.70090787950898
TGGT1_257300:E017	TGGT1_257300	E017	0.0322707633728927	1.34502314381479e-06	9.38669784752922e-05	30.7982498692109	0.893980067718295
TGGT1_282090:E002	TGGT1_282090	E002	0.0171997203530064	1.34475040057779e-06	9.38669784752922e-05	63.5146028749901	0.627774179735207
TGGT1_297520:E001	TGGT1_297520	E001	0.0261894508291918	1.34413886606668e-06	9.38669784752922e-05	37.9591870066267	0.823876612221875
TGGT1_255450:E004	TGGT1_255450	E004	0.0180917041673395	1.35882103486456e-06	9.47438583084285e-05	118.378651772149	0.608638013810265
TGGT1_292330:E006	TGGT1_292330	E006	0.0375596055490979	1.39746246566156e-06	9.73497946274139e-05	26.4574975424495	1.00720824092545
TGGT1_221980:E003	TGGT1_221980	E003	0.00323842771791177	1.40660962628232e-06	9.78982462451581e-05	309.87819326534	-0.173161561895645
TGGT1_242850:E006	TGGT1_242850	E006	0.0073817428449742	1.41100081557745e-06	9.81149951733253e-05	135.128655958783	0.389226731528151
TGGT1_206610:E008	TGGT1_206610	E008	0.0534336646712082	1.41490550583984e-06	9.8297553663848e-05	18.5924293242893	1.3208797578492
TGGT1_251490:E003	TGGT1_251490	E003	0.0107419332595182	1.42101498116471e-06	9.86328167188371e-05	92.7226896956616	0.478099258160203
TGGT1_319650:E012	TGGT1_319650	E012	0.0361075790394757	1.43253185182691e-06	9.93424638076028e-05	27.5224749418916	0.984691527003781
TGGT1_278470:E013	TGGT1_278470	E013	0.0193655039074143	1.43829637979552e-06	9.96522803736231e-05	51.3589983618401	0.694637693910485
TGGT1_202680:E004	TGGT1_202680	E004	0.00726402571880452	1.44194985083407e-06	9.98154060257092e-05	137.328940123403	-0.414254834006388
TGGT1_200330:E038	TGGT1_200330	E038	0.0104938032273276	1.45031867460029e-06	0.00010030435283552	218.584989721689	0.447726810930189
TGGT1_202460:E019	TGGT1_202460	E019	0.0553290874132646	1.45198216795756e-06	0.000100329095179276	17.9551060231051	1.24563118654614
TGGT1_280390:E028	TGGT1_280390	E028	0.110809041116319	1.46988734204057e-06	0.000101475052740675	8.9625282953684	2.29821104738019
TGGT1_231630:E006	TGGT1_231630	E006	0.00619745879396835	1.49172594609052e-06	0.000102817965747144	161.095298557484	-0.390808746319482
TGGT1_254230:E006	TGGT1_254230	E006	0.0285374885769616	1.49201597938579e-06	0.000102817965747144	34.8321577006298	0.856686533496924
TGGT1_262610:E006	TGGT1_262610	E006	0.0370738288633565	1.50298991480183e-06	0.000103481394340169	26.8044920579035	0.974414609900908
TGGT1_225300:E021	TGGT1_225300	E021	0.00923110576149649	1.51059436001868e-06	0.000103911852140336	127.24409412881	0.461455096388446
TGGT1_285810:E012	TGGT1_285810	E012	0.0694539881800206	1.5159101620689e-06	0.000104184247873782	14.3017489183328	1.4827051595692
TGGT1_219650:E025	TGGT1_219650	E025	0.0179203826939011	1.52653315056659e-06	0.000104820578811515	103.72633916186	-0.615987730427802
TGGT1_272320:E018	TGGT1_272320	E018	0.0741751793687915	1.53241838561104e-06	0.000105130742406424	13.3910300812829	1.64941447209241
TGGT1_316235:E006	TGGT1_316235	E006	0.0147031450524687	1.54920094490657e-06	0.000106187290815152	67.6832382581771	0.56672601265
TGGT1_290890:E005	TGGT1_290890	E005	0.0238791520003165	1.57080049355132e-06	0.000107571833799468	41.6370412862681	0.774124607989947
TGGT1_208410:E013	TGGT1_208410	E013	0.0280977090897189	1.58422576804804e-06	0.000108394617399383	35.3780140843182	-0.862177394296491
TGGT1_287160:E009	TGGT1_287160	E009	0.0128830309616837	1.62191125493126e-06	0.000110874372860457	77.271217690837	0.554712903680647
TGGT1_318400:E008	TGGT1_318400	E008	0.0520566283573895	1.62569349710806e-06	0.000111034143322037	19.0845749401885	1.22363351267992
TGGT1_305290:E005	TGGT1_305290	E005	0.0241722797965206	1.64336620005078e-06	0.000112141499745383	41.1314029613939	0.786897206271287
TGGT1_215347:E003	TGGT1_215347	E003	0.00898429170904174	1.65614338123795e-06	0.000112913122434943	110.932465250039	0.418961374782874
TGGT1_201260:E003	TGGT1_201260	E003	0.00644623836119844	1.66803512019237e-06	0.000113623062526792	154.844673600418	-0.411342377814138
TGGT1_264770:E002	TGGT1_264770	E002	0.00665474910462703	1.6715896586683e-06	0.000113764335343752	215.902293124263	-0.361537038679203
TGGT1_239820:E014	TGGT1_239820	E014	0.00155750748179023	1.68206247985651e-06	0.000114173705622557	875.396813380573	-0.183611013908226
TGGT1_311470:E043	TGGT1_311470	E043	0.0595194951296072	1.68186700190609e-06	0.000114173705622557	51.4872868643952	1.11733655272012
TGGT1_314090:E002	TGGT1_314090	E002	0.0139364068148132	1.6800522458631e-06	0.000114173705622557	71.4162094960219	0.580160407543306
TGGT1_274190:E007	TGGT1_274190	E007	0.0690583962384718	1.69192540098016e-06	0.000114741811151909	14.3837155840662	1.43511361076964
TGGT1_201630A:E003	TGGT1_201630A	E003	0.0128624459980096	1.70195976306906e-06	0.00011532053114192	77.3952148021285	0.534763740441184
TGGT1_247220:E002	TGGT1_247220	E002	0.00430536224575104	1.73192058495285e-06	0.000117143998227132	232.46486975491	-0.31758868802382
TGGT1_314810:E002	TGGT1_314810	E002	0.0343600601747186	1.7313360471765e-06	0.000117143998227132	229.279792960383	-0.752306026600921
TGGT1_214940:E004	TGGT1_214940	E004	0.0111003093780391	1.7573088722507e-06	0.000118652321456175	524.050950409879	0.440553363455888
TGGT1_297530:E020	TGGT1_297530	E020	0.179764146653283	1.75634936614899e-06	0.000118652321456175	5.52396275958086	13.9854624350614
TGGT1_288010:E005	TGGT1_288010	E005	0.00354285877742265	1.75886540469109e-06	0.000118653152853599	282.988923508436	-0.244073479368385
TGGT1_304640:E003	TGGT1_304640	E003	0.0229149440117606	1.76912415318382e-06	0.000119240519787882	43.3916755408173	0.750572662338299
TGGT1_219770:E006	TGGT1_219770	E006	0.00931527826668165	1.77588868212155e-06	0.00011959155010357	106.976196638714	0.443213315600958
TGGT1_260340:E012	TGGT1_260340	E012	0.0499542019121703	1.81238545808187e-06	0.000121942435588999	19.8883444581955	1.22583913194993
TGGT1_291950:E023	TGGT1_291950	E023	0.00535854709598647	1.81689498419313e-06	0.000122138897550698	674.555083202734	0.291177698844975
TGGT1_280370:E004	TGGT1_280370	E004	0.00945649399924527	1.81986775617724e-06	0.000122231799634083	170.729537217411	-0.43669840918861
TGGT1_285810:E009	TGGT1_285810	E009	0.066014843460675	1.8277286053615e-06	0.000122652561441189	15.0472103687639	1.43831654275479
TGGT1_290678:E004	TGGT1_290678	E004	0.0309894508872955	1.85371573692173e-06	0.000124287919788704	32.0730770680354	-0.879793370827748
TGGT1_200350:E007	TGGT1_200350	E007	0.00270503348428444	1.88185513768383e-06	0.000126064606115268	487.588082999387	-0.239595333486607
TGGT1_215740:E015	TGGT1_215740	E015	0.0156153125547435	1.88376294433586e-06	0.000126082485499943	63.7207653598958	0.632496150466668
TGGT1_209140:E004	TGGT1_209140	E004	0.0630559281444916	1.88773343231748e-06	0.000126140418353071	15.7536913205281	1.33554441671351
TGGT1_266640:E033	TGGT1_266640	E033	0.00259374424107496	1.88791182771363e-06	0.000126140418353071	387.938450491065	-0.24472958991582
TGGT1_363030:E011	TGGT1_363030	E011	0.000520112001194868	1.89518948380652e-06	0.000126516658876839	15703.38943763	-0.0540443441889808
TGGT1_316730:E052	TGGT1_316730	E052	0.0348993956493394	1.91459857846461e-06	0.000127701398414484	28.4762199576389	0.952474695095841
TGGT1_255190:E003	TGGT1_255190	E003	0.00976039353791611	1.96249625022803e-06	0.00013066925856046	182.808109825168	-0.442962934328476
TGGT1_268590:E003	TGGT1_268590	E003	0.0507750521855279	1.96098966305359e-06	0.00013066925856046	27.2107336595799	1.09733865178439
TGGT1_278830:E013	TGGT1_278830	E013	0.00535225150387008	1.98096814368153e-06	0.000131784977710873	186.700020410633	0.359480087422245
TGGT1_215990:E013	TGGT1_215990	E013	0.0791546774891166	2.03377669712531e-06	0.000135181055429946	12.5482535369694	1.72718950807002
TGGT1_207750:E021	TGGT1_207750	E021	0.0326644237615811	2.03729465441177e-06	0.000135284662038732	30.4266872444399	0.941899119972132
TGGT1_312905:E023	TGGT1_312905	E023	0.00484870799605863	2.03885678307134e-06	0.000135284662038732	254.956316607097	-0.317556601268286
TGGT1_233230:E008	TGGT1_233230	E008	0.000682279642714952	2.05163303105039e-06	0.000135897695867947	1532.70839410232	-0.0668328766007982
TGGT1_273100:E013	TGGT1_273100	E013	0.0230436315627697	2.05103216305501e-06	0.000135897695867947	43.1489903968397	0.784885363399146
TGGT1_263180:E005	TGGT1_263180	E005	0.0941568162742633	2.07640071404944e-06	0.00013741981194265	11.1942714422419	1.78076617781012
TGGT1_223920:E030	TGGT1_223920	E030	0.0252159652772311	2.11037855478785e-06	0.00013954832789521	39.4266455387587	-0.821916360735259
TGGT1_282055:E005	TGGT1_282055	E005	0.00596287036774325	2.1230987430603e-06	0.000140268734411457	176.12463525578	-0.378771238931267
TGGT1_318650:E007	TGGT1_318650	E007	0.000378830754642373	2.12781192958068e-06	0.000140459351574906	2883.53678038926	-0.0495203399866826
TGGT1_200350:E015	TGGT1_200350	E015	0.00453350119814063	2.14670065709524e-06	0.000141463154707742	220.676790942737	0.3093438924522
TGGT1_235470:E012	TGGT1_235470	E012	0.0145351770629394	2.14592101688481e-06	0.000141463154707742	68.4672455577301	-0.59704179111867
TGGT1_208740:E012	TGGT1_208740	E012	0.0175681005125083	2.17912447868275e-06	0.000143476767410922	56.6239162522865	0.75508687538735
TGGT1_234980:E002	TGGT1_234980	E002	0.023160376142373	2.26234034682496e-06	0.000148828292148108	42.9311644407281	-0.724553912984514
TGGT1_245730:E005	TGGT1_245730	E005	0.0939508870073188	2.28735949858472e-06	0.000150345459189696	10.5713180651285	1.79895289375664
TGGT1_254470:E002	TGGT1_254470	E002	0.00512857005065775	2.29726497096121e-06	0.000150867477413459	307.704379115069	-0.316317015091639
TGGT1_215030:E002	TGGT1_215030	E002	0.0455617694522339	2.30666732963951e-06	0.000151355591466705	21.8071561471194	1.19712653617364
TGGT1_293390:E002	TGGT1_293390	E002	0.0167979752780303	2.30971050624576e-06	0.000151425960894544	59.2252605319807	0.594291332878249
TGGT1_202360:E009	TGGT1_202360	E009	0.0250577453344328	2.3351479210233e-06	0.00015296313794345	39.6759372524019	0.796777685768868
TGGT1_263100:E012	TGGT1_263100	E012	0.00511627065222483	2.33820850784963e-06	0.000153033157681126	195.369802120951	-0.337916622222396
TGGT1_208740:E019	TGGT1_208740	E019	0.0110111929843021	2.34748868851694e-06	0.000153509777327299	90.4481848263726	-0.504498454703479
TGGT1_248170:E002	TGGT1_248170	E002	0.0547632851419895	2.36104632808091e-06	0.000154265065230232	18.140731271152	-1.12729903084802
TGGT1_286920:E005	TGGT1_286920	E005	0.00749984104887534	2.36569131715055e-06	0.000154437233420473	132.990976803878	0.414151400569517
TGGT1_210255:E002	TGGT1_210255	E002	0.00180333103476592	2.38272273406623e-06	0.000155285213500803	561.293573871281	0.0922111187762304
TGGT1_242070:E013	TGGT1_242070	E013	0.0136963176791568	2.38088538813392e-06	0.000155285213500803	88.9852518898364	-0.555488841146013
TGGT1_270370:E007	TGGT1_270370	E007	0.0178116577072247	2.3962454253341e-06	0.000156034160802031	55.8481352510397	0.627024693437432
TGGT1_235680:E023	TGGT1_235680	E023	0.0104357330227283	2.40837073745568e-06	0.000156690924939781	95.4523445706207	0.499780050299997
TGGT1_219720:E007	TGGT1_219720	E007	0.0639569702602208	2.41933921839214e-06	0.000156813874621	15.5316294267769	1.46227228566541
TGGT1_263100:E013	TGGT1_263100	E013	0.00623462538031921	2.41237140691706e-06	0.000156813874621	160.129610668967	-0.375048407068209
TGGT1_275630:E024	TGGT1_275630	E024	0.073869925446105	2.42046481903909e-06	0.000156813874621	13.4463919322233	1.48165327918783
TGGT1_278510:E013	TGGT1_278510	E013	0.00613541679907459	2.41764444581233e-06	0.000156813874621	162.733530017067	0.362516253165328
TGGT1_313180:E018	TGGT1_313180	E018	0.0247587055843019	2.41645099280461e-06	0.000156813874621	45.7141993878515	0.758143684193516
TGGT1_300220:E003	TGGT1_300220	E003	0.0443857979520727	2.42458646300549e-06	0.000156948567866851	22.3853716555914	-1.14743481139557
TGGT1_246220:E004	TGGT1_246220	E004	0.015889953294546	2.43147661073427e-06	0.000157262094561438	62.6170223851961	0.602882835120246
TGGT1_219260A:E016	TGGT1_219260A	E016	0.0421187314783982	2.44953364631278e-06	0.000158296734046876	23.5912664372402	1.09847605072156
TGGT1_278830:E033	TGGT1_278830	E033	0.052025403813324	2.51571271290965e-06	0.000162436821614991	19.096036703465	1.22484246763564
TGGT1_315130:E003	TGGT1_315130	E003	0.0806761378190691	2.52889134126697e-06	0.000163150649864761	12.3115064137203	1.57147536630745
TGGT1_269920:E003	TGGT1_269920	E003	0.00730781703977767	2.5357882569076e-06	0.00016345835763088	136.502104729988	0.412886138151837
TGGT1_225560:E010	TGGT1_225560	E010	0.00199980322677645	2.55016124160728e-06	0.000163972166796132	666.437336865641	-0.209561529381175
TGGT1_290910:E003	TGGT1_290910	E003	0.0412227180392753	2.55004928426749e-06	0.000163972166796132	24.1044739843305	1.06558680459399
TGGT1_295760:E017	TGGT1_295760	E017	0.0668297224812593	2.54643866879765e-06	0.000163972166796132	14.8636394472155	1.34245907172617
TGGT1_213770:E017	TGGT1_213770	E017	0.0697878559104665	2.58527773122723e-06	0.000166091124610624	14.2332949483726	1.53644621647993
TGGT1_271790:E002	TGGT1_271790	E002	0.00545041817446231	2.62128247410017e-06	0.000168263560118993	183.31595851505	0.312117114077824
TGGT1_224830:E015	TGGT1_224830	E015	0.0106870812059854	2.65508505899624e-06	0.000170236862835807	93.2001365735168	0.419047392222105
TGGT1_270900:E025	TGGT1_270900	E025	0.0239025495969935	2.65645455366727e-06	0.000170236862835807	41.5962248929966	0.760499853657875
TGGT1_312420:E008	TGGT1_312420	E008	0.0106687176812952	2.66490796636306e-06	0.000170636277842865	93.3610780742443	-0.497647384841532
TGGT1_203160:E010	TGGT1_203160	E010	0.0198332914611819	2.66856614568001e-06	0.000170728240579197	50.1455338941429	0.660792107685658
TGGT1_241880:E010	TGGT1_241880	E010	0.0572019380648325	2.68215694969905e-06	0.000171342899744407	17.3668822445686	1.28572244835444
TGGT1_315290:E004	TGGT1_315290	E004	0.0110577440387976	2.68263347596238e-06	0.000171342899744407	90.0662221550043	-0.504735736609895
TGGT1_277510:E009	TGGT1_277510	E009	0.0477727644258335	2.71616800629551e-06	0.000173340698587814	20.7971584449001	1.09409018283215
TGGT1_202160:E008	TGGT1_202160	E008	0.0648374809707291	2.73353120241304e-06	0.000174304014107727	15.3205932826345	1.61513316344809
TGGT1_239780:E011	TGGT1_239780	E011	0.00499747165643877	2.74781951521614e-06	0.000175003128420384	298.11537127837	-0.274194756391253
TGGT1_319950:E008	TGGT1_319950	E008	0.02156284856736	2.74905027530231e-06	0.000175003128420384	46.116907967131	0.72795132466915
TGGT1_275980:E013	TGGT1_275980	E013	0.0225479593594491	2.76484792284001e-06	0.000175863095900048	44.0989900427264	0.722227568924084
TGGT1_217182:E019	TGGT1_217182	E019	0.0247466084821448	2.80725656659231e-06	0.000178412880733874	40.1754761111578	-0.761433925640865
TGGT1_211680:E004	TGGT1_211680	E004	0.0115878690115516	2.822445690405e-06	0.000179229966540205	85.9335354224521	-0.52734884126345
TGGT1_244150:E016	TGGT1_244150	E016	0.08398645561787	2.83575069393494e-06	0.000179926156952831	11.8260500547027	1.57649907900503
TGGT1_269430:E020	TGGT1_269430	E020	0.0664960303122781	2.8544387624612e-06	0.000180962467979564	14.9382673092496	1.60707271524101
TGGT1_278490:E011	TGGT1_278490	E011	0.0212903039687338	2.8707964915755e-06	0.000181849455913592	46.7082254576143	0.689521681940627
TGGT1_249180:E015	TGGT1_249180	E015	0.000629958518196775	2.9060871704196e-06	0.000183933294821689	1667.38834977758	-0.100338710176501
TGGT1_215740:E001	TGGT1_215740	E001	0.00261775248962218	2.92228265215323e-06	0.000184806116990533	384.332991433785	-0.204508301488842
TGGT1_263090:E004	TGGT1_263090	E004	0.014514411982302	2.96960856622334e-06	0.000187644583390545	113.085539472749	0.56022430250702
TGGT1_262590:E002	TGGT1_262590	E002	0.00648406874580145	3.00359788437056e-06	0.000189636360428415	153.936418174027	-0.384760366319839
TGGT1_269920:E005	TGGT1_269920	E005	0.00750513817293837	3.06553319545016e-06	0.000193387827700167	132.896678030773	0.414088145782594
TGGT1_289190:E023	TGGT1_289190	E023	0.0834884789623374	3.10841475803958e-06	0.000195932128600071	11.8966170744751	1.79347099105945
TGGT1_210380:E018	TGGT1_210380	E018	0.0207481664428418	3.13688198851583e-06	0.00019756442733737	47.9307184340917	-0.718378958987463
TGGT1_205540:E014	TGGT1_205540	E014	0.141149662056883	3.17524715344951e-06	0.000199816925085668	7.03552968704731	2.33427255776029
TGGT1_254470:E003	TGGT1_254470	E003	0.000334999379517439	3.18645451591826e-06	0.000200358106088061	3304.16889408286	0.0643661652584834
TGGT1_310040:E013	TGGT1_310040	E013	0.0177674853583478	3.20143553193667e-06	0.000201135488117267	110.939751007354	-0.581178444249895
TGGT1_267060:E004	TGGT1_267060	E004	0.00603080202041536	3.21044644542865e-06	0.000201372304920328	165.572680168889	-0.365803487572939
TGGT1_269425:E002	TGGT1_269425	E002	0.00152413706787828	3.20855088672073e-06	0.000201372304920328	666.495277455777	-0.125048030449619
TGGT1_236200:E023	TGGT1_236200	E023	0.016744185219981	3.22383162364835e-06	0.000202045194565856	59.4159125300079	0.611280879236862
TGGT1_267660:E017	TGGT1_267660	E017	0.164603677065086	3.22643327735734e-06	0.000202045194565856	6.03284226779551	2.76368432558704
TGGT1_285230:E005	TGGT1_285230	E005	0.0622011917910136	3.2315103503769e-06	0.000202198339407093	15.970290557074	1.31524572022041
TGGT1_285240:E014	TGGT1_285240	E014	0.0358683385223912	3.27382281165882e-06	0.000204679189080088	33.475774124446	0.931006723017621
TGGT1_239020:E061	TGGT1_239020	E061	0.0455195868505621	3.35951412028209e-06	0.0002098658426505	21.8273799861971	1.08695864053032
TGGT1_307820:E002	TGGT1_307820	E002	0.0690139372922413	3.39344692330736e-06	0.000211813388502167	14.3929862463101	1.38714012642345
TGGT1_213445:E011	TGGT1_213445	E011	0.0044143816314132	3.43526677265953e-06	0.000214249669651656	226.678567474439	-0.301882794665866
TGGT1_229030:E001	TGGT1_229030	E001	0.0038380584137669	3.4421636566957e-06	0.000214505700640331	261.025604848756	-0.29384363903658
TGGT1_286932:E064	TGGT1_286932	E064	0.00180759380343422	3.46079064632226e-06	0.000215491710608965	559.94412596183	0.097065620969631
TGGT1_226870A:E009	TGGT1_226870A	E009	0.0316887691389614	3.49827408677543e-06	0.000217649300409363	49.2450256524464	0.820612110746594
TGGT1_281580:E010	TGGT1_281580	E010	0.0141403255378786	3.58974251654711e-06	0.000223159422122921	112.1480329412	0.520067079370706
TGGT1_214090:E021	TGGT1_214090	E021	0.0069331850251517	3.61650564008292e-06	0.000224334950692477	143.914856572679	0.393211029690224
TGGT1_321360:E014	TGGT1_321360	E014	0.0630441090312756	3.61741093363847e-06	0.000224334950692477	15.7566463417789	1.41595435694097
TGGT1_321540:E013	TGGT1_321540	E013	0.0277068100286565	3.61638159382818e-06	0.000224334950692477	35.8777643660623	0.816458629448889
TGGT1_232960:E002	TGGT1_232960	E002	0.00443304927687398	3.63255896265827e-06	0.000224911307827376	225.716527847752	-0.287485046231335
TGGT1_265090:E015	TGGT1_265090	E015	0.0471900960506876	3.63086866327069e-06	0.000224911307827376	21.05413436781	1.09290083783136
TGGT1_281545:E025	TGGT1_281545	E025	0.0308541901987263	3.7194415766388e-06	0.000230105259600801	32.2138387015853	-0.826429656313135
TGGT1_208050:E022	TGGT1_208050	E022	0.0846640954388801	3.74372570746678e-06	0.000231421280920857	11.7313573562318	1.72896623324497
TGGT1_214200:E011	TGGT1_214200	E011	0.0471022882569739	3.74691102708883e-06	0.000231431995649859	21.0934121439343	1.21874417053678
TGGT1_217020:E024	TGGT1_217020	E024	0.00269618982101186	3.76643888430927e-06	0.000232451296830258	373.006979101531	-0.237718223743026
TGGT1_224510:E017	TGGT1_224510	E017	0.184996162250002	3.78193333350401e-06	0.000233220233985913	5.3677062532809	13.305073735908
TGGT1_219290:E012	TGGT1_219290	E012	0.0327652871585596	3.79876014410948e-06	0.000234070034637482	30.3329241058721	0.888671685483686
TGGT1_216970:E019	TGGT1_216970	E019	0.14104558836022	3.80297436337904e-06	0.000234141644670934	7.04072228373079	2.72111491800559
TGGT1_265005:E009	TGGT1_265005	E009	0.00841957480895248	3.80601681734056e-06	0.000234141644670934	118.403551959299	-0.34745275666013
TGGT1_291350:E020	TGGT1_291350	E020	0.0370604061324403	3.8436253007197e-06	0.00023626610978512	26.8142093007728	0.99806358942254
TGGT1_249820:E021	TGGT1_249820	E021	0.11768079909083	3.85477964013817e-06	0.000236615612445126	20.2675081559798	1.69390951876389
TGGT1_253080:E001	TGGT1_253080	E001	0.0618766102670225	3.85546997906345e-06	0.000236615612445126	16.0541114887838	1.33034355547477
TGGT1_269920:E006	TGGT1_269920	E006	0.00672240543546358	3.9090468688089e-06	0.00023971223803565	148.450570459629	0.387509055788626
TGGT1_255650:E004	TGGT1_255650	E004	0.0117063578685881	3.93142337419724e-06	0.000240892167307172	85.0611646410492	0.49928538932374
TGGT1_234640:E003	TGGT1_234640	E003	0.0242386549435872	3.93807674411497e-06	0.000241107571942281	41.0186080428841	0.754861577861806
TGGT1_248830:E016	TGGT1_248830	E016	0.0813907968754809	3.96190592212676e-06	0.00024237338004654	12.2033582734468	1.55935630006538
TGGT1_289320:E032	TGGT1_289320	E032	0.00514767196474953	3.98310395030253e-06	0.000243476339084642	194.169979846998	-0.310656115675151
TGGT1_226690:E008	TGGT1_226690	E008	0.0250035055920744	4.02276414960059e-06	0.000245705189954579	39.7621246946024	0.766541538114204
TGGT1_263140:E024	TGGT1_263140	E024	0.0653745482418934	4.04750143627075e-06	0.000247019752072069	15.1946645064247	1.36683114778986
TGGT1_278950:E011	TGGT1_278950	E011	0.02659547742986	4.05664190501666e-06	0.000247381106393465	37.3789201876227	0.748390627145545
TGGT1_285830:E004	TGGT1_285830	E004	0.00539703670100233	4.06032259325109e-06	0.00024740920467695	235.884374181619	-0.315451713321649
TGGT1_219630:E020	TGGT1_219630	E020	0.0357090462964284	4.06684439088822e-06	0.000247444057254115	27.8299382765829	0.947220301375106
TGGT1_285830:E035	TGGT1_285830	E035	0.106883635809172	4.06733532428319e-06	0.000247444057254115	9.29179220506411	2.01892580344549
TGGT1_240070:E006	TGGT1_240070	E006	0.0168976676943363	4.1037664625686e-06	0.000249462898484481	58.8751295236692	0.645025052839584
TGGT1_320515:E020	TGGT1_320515	E020	0.0290962522074473	4.1553842579391e-06	0.000252400996227088	34.162447245265	0.840567759730328
TGGT1_250220:E020	TGGT1_250220	E020	0.000784210083356563	4.22398734760573e-06	0.000256162995917901	2957.01916019256	-0.104515581141129
TGGT1_286220:E021	TGGT1_286220	E021	0.0898909259218534	4.22380487873938e-06	0.000256162995917901	11.0489594939964	1.57730329007527
TGGT1_225170:E005	TGGT1_225170	E005	0.00957909213185974	4.23720089764662e-06	0.000256761676161257	104.019351969001	-0.431193619451768
TGGT1_233110:E004	TGGT1_233110	E004	0.0576816001774564	4.28012105423014e-06	0.00025854690365085	17.2223782028684	1.24195930159742
TGGT1_250710:E001	TGGT1_250710	E001	0.000158361796255464	4.2800168595483e-06	0.00025854690365085	8618.67036052184	0.0326380774036225
TGGT1_250710:E002	TGGT1_250710	E002	0.000158361796255578	4.28001685949949e-06	0.00025854690365085	27844.3004607571	-0.0212978335177564
TGGT1_297230:E024	TGGT1_297230	E024	0.0650811550421873	4.27857937089896e-06	0.00025854690365085	15.2632001277331	-1.32346209252918
TGGT1_222410:E029	TGGT1_222410	E029	0.00147872854050496	4.28475460750855e-06	0.000258623479793507	687.451159221958	-0.157373471420763
TGGT1_229750:E017	TGGT1_229750	E017	0.0323565039507456	4.31387300371954e-06	0.000260176656190579	30.716551291779	0.881411985038776
TGGT1_275320:E050	TGGT1_275320	E050	0.0105677381695816	4.37117064100857e-06	0.000263425598857393	94.2561093890601	-0.482007545527871
TGGT1_246740:E004	TGGT1_246740	E004	0.0227493206538387	4.38386600525664e-06	0.000263983630286759	43.7080629281964	0.706701164663202
TGGT1_221720:E002	TGGT1_221720	E002	0.0655686527567406	4.41433219956488e-06	0.000265610057335917	15.1496596660326	-1.28331590974129
TGGT1_215090:E004	TGGT1_215090	E004	0.0813149623575429	4.43636935824373e-06	0.000266727161486208	12.2147439871108	1.51100454173734
TGGT1_250010:E010	TGGT1_250010	E010	0.0286415021408554	4.44151558784129e-06	0.000266827782035153	107.507308208475	0.70270197570687
TGGT1_299670:E024	TGGT1_299670	E024	0.00138613253693739	4.44973746988932e-06	0.000267112873417098	734.547083784589	0.157035897447322
TGGT1_268290:E009	TGGT1_268290	E009	0.0219686924794514	4.50880222461459e-06	0.000270447179182444	45.2636152248094	0.711605733621895
TGGT1_314860:E011	TGGT1_314860	E011	0.0585942679158662	4.56013588958036e-06	0.00027331291836793	33.351683385584	1.07540905451358
TGGT1_290710:E005	TGGT1_290710	E005	0.0226563325126223	4.66864899474798e-06	0.000279598583639478	43.8877272382367	0.718847627003894
TGGT1_233090:E012	TGGT1_233090	E012	0.0282174469197535	4.67861649127872e-06	0.000279977301666965	35.2277072220706	0.79003329955457
TGGT1_319940:E002	TGGT1_319940	E002	0.0255770564992806	4.73690874168147e-06	0.000283245024890723	38.8692765347333	0.731840969616545
TGGT1_311335:E016	TGGT1_311335	E016	0.00905071033669868	4.7563814665547e-06	0.000284188244747794	117.078139405712	-0.455469237386177
TGGT1_278580:E002	TGGT1_278580	E002	0.026245553604355	4.86192516272813e-06	0.00029026864314572	37.8779381656981	-0.51066157824343
TGGT1_285800:E015	TGGT1_285800	E015	0.0263199087565589	4.86836448442904e-06	0.000290427423827697	37.7707904127741	0.797261810950737
TGGT1_224980:E011	TGGT1_224980	E011	0.0068993813780846	4.91432799385154e-06	0.000292941986085004	144.623516215263	0.3573853657915
TGGT1_305950:E013	TGGT1_305950	E013	0.0294198678503206	4.9234319645576e-06	0.00029325716423311	33.7862221933119	0.797180598365111
TGGT1_219500:E012	TGGT1_219500	E012	0.00840448231032516	4.95760692966204e-06	0.000294875569840941	118.617054283517	0.412295083942087
TGGT1_233160:E005	TGGT1_233160	E005	0.0327059164678495	4.95827838456076e-06	0.000294875569840941	48.0383970844427	0.812262568968061
TGGT1_255670:E007	TGGT1_255670	E007	0.010851695523791	5.01452887167514e-06	0.000297990220350273	91.7818288780638	0.474007427624666
TGGT1_261450:E008	TGGT1_261450	E008	0.0571882700544923	5.07485253473779e-06	0.000301341919792618	20.1760577239924	1.20393378569437
TGGT1_219630:E014	TGGT1_219630	E014	0.0151127322547961	5.09420860514663e-06	0.000302148511819399	65.8446783537471	0.581216496776358
TGGT1_260650:E015	TGGT1_260650	E015	0.0237559943411469	5.09630088782672e-06	0.000302148511819399	41.8532134111244	0.76935592007049
TGGT1_263100:E016	TGGT1_263100	E016	0.022488524469627	5.11005938957591e-06	0.000302730634785539	44.2157184037481	0.729872672113772
TGGT1_203300:E023	TGGT1_203300	E023	0.0580738473987654	5.1377683784514e-06	0.00030413768019651	198.467866432004	0.969783719894347
TGGT1_278630:E009	TGGT1_278630	E009	0.0279595180472186	5.1591969077114e-06	0.000305171064509485	35.5530875231073	1.03521487127352
TGGT1_314860:E013	TGGT1_314860	E013	0.0411957110614843	5.17715445950666e-06	0.000305997705542395	24.1202895875236	1.00324575243159
TGGT1_273090:E024	TGGT1_273090	E024	0.0805125357890162	5.22155309170447e-06	0.000308384684786546	12.3365342121228	1.44612345341589
TGGT1_309140:E021	TGGT1_309140	E021	0.0638778490436612	5.27858626548595e-06	0.000311501634583155	15.5508778199997	1.37311435911481
TGGT1_320430:E017	TGGT1_320430	E017	0.107132940557121	5.28243723547055e-06	0.000311501634583155	9.27016267963291	1.81786117904131
TGGT1_220630:E023	TGGT1_220630	E023	0.00363042058513474	5.34659717874054e-06	0.000315043318575833	276.098006434979	-0.26915356244539
TGGT1_301270:E002	TGGT1_301270	E002	0.0405626322222524	5.4273003406201e-06	0.000319553621664542	24.4970662443536	0.991838503354937
TGGT1_222140:E016	TGGT1_222140	E016	0.13410919005947	5.43470409230449e-06	0.000319744531654211	7.40497643929645	2.58005777865646
TGGT1_250220:E010	TGGT1_250220	E010	0.00868645949152271	5.45219428182868e-06	0.000320528119382456	634.609896278609	0.350011147075877
TGGT1_234280:E018	TGGT1_234280	E018	0.0591558824804405	5.47359648865165e-06	0.00032154031605392	16.7929116231326	1.24307243232171
TGGT1_219290:E014	TGGT1_219290	E014	0.0278309370979922	5.59472074550982e-06	0.000328404551507057	35.7175493840065	0.7923160555545
TGGT1_206695:E004	TGGT1_206695	E004	0.00276025760596131	5.65794208267207e-06	0.000331862057867385	364.239528283208	0.160844304386162
TGGT1_290670:E005	TGGT1_290670	E005	0.0264080976882589	5.66887803483777e-06	0.000332249871520083	37.6444910436063	0.769740178412964
TGGT1_206400:E011	TGGT1_206400	E011	0.0785310865570211	5.69124558368954e-06	0.000333306583013684	12.647939139938	1.49925839035209
TGGT1_254390:E004	TGGT1_254390	E004	0.0175418564923649	5.70622861713067e-06	0.000333929541701804	56.7087972152826	0.615810840998072
TGGT1_293540:E004	TGGT1_293540	E004	0.0160711869782368	5.7494608414319e-06	0.000336203441912559	61.9093742915647	0.578620972536251
TGGT1_278500:E002	TGGT1_278500	E002	0.0623603165288379	5.78299182231309e-06	0.000337907028631993	15.9295166139714	-1.2055963357623
TGGT1_312840:E006	TGGT1_312840	E006	0.034798324073301	5.79891246425183e-06	0.000338579815361488	28.5590111503835	0.882976946070881
TGGT1_230500:E004	TGGT1_230500	E004	0.0253457765819205	5.82950633885469e-06	0.000340107652664068	44.7428594379695	-0.711483042910545
TGGT1_300350:E016	TGGT1_300350	E016	0.00867442804928457	5.83744583785367e-06	0.000340226421176352	114.910974904133	-0.419680076890772
TGGT1_313480:E019	TGGT1_313480	E019	0.107503459066667	5.84039784910405e-06	0.000340226421176352	9.2382021240244	1.87171867878211
TGGT1_212260:E003	TGGT1_212260	E003	0.00829966022655179	5.8540672782447e-06	0.000340764369286733	120.121407898187	0.407391287093699
TGGT1_242000:E004	TGGT1_242000	E004	0.00029239897816938	5.87053545023254e-06	0.000341464294011747	3850.01167695083	0.0520084676910883
TGGT1_270840:E026	TGGT1_270840	E026	0.179666541954882	5.91328181613423e-06	0.000343690495390549	5.52696425523168	14.3807968822362
TGGT1_266870:E005	TGGT1_266870	E005	0.0176809547861896	5.92443536677031e-06	0.00034407848849322	56.2617891342696	0.609336651237365
TGGT1_243490:E008	TGGT1_243490	E008	0.0409643202218459	5.93393758024154e-06	0.000344370061822522	24.2566502500187	0.986155726476682
TGGT1_230190:E002	TGGT1_230190	E002	0.00949971940103475	5.95914116684045e-06	0.000345571720631335	104.891631949879	-0.437318691406641
TGGT1_221980:E004	TGGT1_221980	E004	0.01685366792601	6.00562464410114e-06	0.000347868742469981	77.2026472819134	0.569482029588278
TGGT1_294700:E009	TGGT1_294700	E009	0.0233431003006262	6.00780641172436e-06	0.000347868742469981	42.5946118794105	0.720796183850128
TGGT1_285680:E005	TGGT1_285680	E005	0.0492838955943837	6.02260311404153e-06	0.00034846291827832	20.1590338628578	1.05016715663891
TGGT1_297180:E008	TGGT1_297180	E008	0.00826289924548397	6.07412854341464e-06	0.000351179695177089	121.083522440245	0.403341520499068
TGGT1_234190:E010	TGGT1_234190	E010	0.0253340741381911	6.13840626149464e-06	0.000354629114221401	39.242585495665	-0.766120513242174
TGGT1_261030:E002	TGGT1_261030	E002	0.0274598848833681	6.15821728310752e-06	0.000355506342135336	40.9543896333377	0.753569058633825
TGGT1_272320:E013	TGGT1_272320	E013	0.0543879329860097	6.18644453326843e-06	0.000356867746698758	18.2660069950441	1.22143363320129
TGGT1_225170:E004	TGGT1_225170	E004	0.00746167211277107	6.20176893524064e-06	0.000357483360597963	133.674432197922	-0.358797658479075
TGGT1_249810:E026	TGGT1_249810	E026	0.013571316414847	6.2464694726994e-06	0.000359790086112297	73.3423211374863	0.534563376640175
TGGT1_308040:E008	TGGT1_308040	E008	0.047509177505759	6.34532509375872e-06	0.000365210295302725	20.9126276183242	1.14315719738353
TGGT1_313180:E016	TGGT1_313180	E016	0.0287116503232545	6.36005924977826e-06	0.000365541976454837	34.6206152521162	0.809152879981585
TGGT1_320640:E017	TGGT1_320640	E017	0.0347026966925017	6.36060260707884e-06	0.000365541976454837	28.6377872514026	0.915197971139978
TGGT1_224280:E010	TGGT1_224280	E010	0.0577828872444569	6.37205035936456e-06	0.000365926183454779	17.1921712135766	1.25212843600741
TGGT1_227840:E003	TGGT1_227840	E003	0.0185594276647145	6.39583838124003e-06	0.000367017948991292	53.5937883668156	0.632735166768961
TGGT1_268400:E010	TGGT1_268400	E010	0.0475431942259566	6.40720502617671e-06	0.000367395830295776	20.8976539512769	1.04530009731363
TGGT1_281430:E009	TGGT1_281430	E009	0.0398765717768996	6.43480449675516e-06	0.000368703261086634	24.9188936685824	0.971280178806062
TGGT1_313930:E018	TGGT1_313930	E018	0.00451045259291837	6.45733926998517e-06	0.000369718761168294	221.813156883896	0.305523091840292
TGGT1_246330:E006	TGGT1_246330	E006	0.0405852287620725	6.48473434117754e-06	0.000371010820977706	33.6041128951738	0.897834751104084
TGGT1_293220:E012	TGGT1_293220	E012	0.0294930930217225	6.49597524711053e-06	0.000371377418201065	33.7022397720486	0.831755483661241
TGGT1_230580:E020	TGGT1_230580	E020	0.0237750137383535	6.50820352974264e-06	0.000371799877037052	41.8196832305809	0.719008696753866
TGGT1_201260:E004	TGGT1_201260	E004	0.00450427337742987	6.57551411902366e-06	0.000375366105767772	292.074177948556	-0.305392553682212
TGGT1_239700:E015	TGGT1_239700	E015	0.0322983918756147	6.77261154490507e-06	0.000386330477561894	30.771876418052	0.845497955224957
TGGT1_244860:E011	TGGT1_244860	E011	0.0647252433396203	6.78035082087718e-06	0.000386485026723843	15.3471743305523	1.28937571417952
TGGT1_200290:E006	TGGT1_200290	E006	0.00162899703858761	6.9108467664588e-06	0.000393631381018825	622.663431046457	0.158124911897123
TGGT1_202460:E035	TGGT1_202460	E035	0.071838524700328	6.91693317820248e-06	0.000393686218232255	13.8268026408769	1.31369749619998
TGGT1_221818:E017	TGGT1_221818	E017	0.00555431378115748	7.0559158138665e-06	0.000401160727621188	179.865514708594	0.351824931258046
TGGT1_301390:E003	TGGT1_301390	E003	0.0467436603720905	7.05869963355995e-06	0.000401160727621188	21.2553651675012	1.04574668851161
TGGT1_259690:E007	TGGT1_259690	E007	0.0111590744127252	7.09102397033615e-06	0.000402699932600679	89.2458344500185	0.455663982667875
TGGT1_275320:E001	TGGT1_275320	E001	0.0251397898584698	7.25643596848576e-06	0.000411789343065392	39.5462754726301	0.754486856406531
TGGT1_201770:E020	TGGT1_201770	E020	0.0653810469490886	7.33238797311507e-06	0.000415792394605345	15.1931533980771	1.3939886886827
TGGT1_265390:E013	TGGT1_265390	E013	0.00967524584604104	7.39236240625732e-06	0.000418884181570497	104.035608795659	0.442540440316089
TGGT1_273130:E003	TGGT1_273130	E003	0.0597037897879464	7.41239929780808e-06	0.00041971004041686	16.6387123222242	1.0596320936496
TGGT1_261022:E060	TGGT1_261022	E060	0.0307291815896146	7.43464547144386e-06	0.000420659686369169	36.5559492047002	0.794640742996607
TGGT1_253360:E007	TGGT1_253360	E007	0.0166818097540092	7.46634754921674e-06	0.000422142565591734	59.6385371306185	0.58459095940865
TGGT1_228000:E004	TGGT1_228000	E004	0.0271635317638937	7.47990802618301e-06	0.000422287797948438	39.9922442510307	0.763830512986963
TGGT1_243250:E027	TGGT1_243250	E027	0.0461494007483038	7.47847297469742e-06	0.000422287797948438	40.5809982840392	0.953673232204992
TGGT1_304955:E026	TGGT1_304955	E026	0.00594715037724751	7.50320426894004e-06	0.000423292001771326	232.653938279644	0.370835419997437
TGGT1_253890:E020	TGGT1_253890	E020	0.00257042976909962	7.60847297239039e-06	0.000428915801745826	391.505058539878	-0.199713218026304
TGGT1_321685:E014	TGGT1_321685	E014	0.0217037327491116	7.61468780790046e-06	0.000428951442152235	201.192355729485	-0.391210765677988
TGGT1_262860:E007	TGGT1_262860	E007	0.017820300619905	7.63378970623844e-06	0.000429712453962083	55.8209961173203	0.596596522162203
TGGT1_222800:E029	TGGT1_222800	E029	0.0948327761836905	7.6776582164175e-06	0.000431865464403273	10.472975207361	1.79558532438843
TGGT1_291310:E003	TGGT1_291310	E003	0.0277145661002025	7.68600004943317e-06	0.000432018424139208	35.8677112559048	0.773059805623576
TGGT1_286090:E008	TGGT1_286090	E008	0.00270700615924368	7.79499155148325e-06	0.000437824390234882	371.497307504806	-0.233485183766962
TGGT1_268400:E011	TGGT1_268400	E011	0.05420633899006	7.83005006786252e-06	0.000439472284196021	18.3272380472379	1.12575825567921
TGGT1_226590:E002	TGGT1_226590	E002	0.000413885447573136	7.90999593680098e-06	0.000443635297661297	2617.08474332787	0.0516053966884797
TGGT1_236220:E012	TGGT1_236220	E012	0.0520080694781233	7.96435622345284e-06	0.000446358307178298	19.1024056571583	1.18786736921873
TGGT1_229030:E019	TGGT1_229030	E019	0.00488254244174726	7.97771089243598e-06	0.000446780883266839	204.788792481665	-0.318024297126128
TGGT1_316710:E003	TGGT1_316710	E003	0.00722947172459407	8.07371559076446e-06	0.00045182817541702	137.988467324365	-0.364582904099343
TGGT1_231940:E013	TGGT1_231940	E013	0.0233222786598062	8.12221261986118e-06	0.000454111029101441	42.6326958313218	0.704365225825188
TGGT1_324600:E006	TGGT1_324600	E006	0.00466620764962323	8.12632800622723e-06	0.000454111029101441	214.353984972376	-0.308866574079169
TGGT1_231380:E004	TGGT1_231380	E004	0.0259461758488986	8.1393979593672e-06	0.000454510843752833	54.2751476865935	-0.695095319533142
TGGT1_316230:E023	TGGT1_316230	E023	0.0213754368939823	8.34808855395034e-06	0.000465825766317998	46.5218975352849	0.662539518146204
TGGT1_320440B:E017	TGGT1_320440B	E017	0.0307154513391373	8.36879088885739e-06	0.000466642079482682	32.3595093740637	0.854159332202031
TGGT1_233830:E012	TGGT1_233830	E012	0.0430398588786371	8.39779020942401e-06	0.000467919511473178	23.0859672171014	1.03594385281177
TGGT1_267050:E007	TGGT1_267050	E007	0.0119829622395793	8.54622528235672e-06	0.000475500587994528	83.092012651428	-0.485778197722077
TGGT1_268960:E012	TGGT1_268960	E012	0.014395536596431	8.54582015680985e-06	0.000475500587994528	69.1329923761441	0.546328462813053
TGGT1_277685:E003	TGGT1_277685	E003	0.00272285430963772	8.56104602956603e-06	0.000475980530950626	369.307269219186	0.181279066069658
TGGT1_253170:E005	TGGT1_253170	E005	0.0888380270860506	8.57645282679842e-06	0.000476492339734425	11.1799614956035	1.67575113249778
TGGT1_214220:E001	TGGT1_214220	E001	0.00836948123162378	8.68739861255281e-06	0.000482307548549654	215.220279143897	0.37942659258831
TGGT1_201200:E004	TGGT1_201200	E004	0.0194555303206976	8.71278555751774e-06	0.000483367728435372	51.1209228236417	-0.614098415896914
TGGT1_203220:E013	TGGT1_203220	E013	0.133614573040117	8.80422781966833e-06	0.000488088349913316	8.63108841170305	2.2759613739428
TGGT1_311840:E004	TGGT1_311840	E004	0.00922289928831048	8.83570718561052e-06	0.000489480341038757	108.051724355716	-0.423474134364117
TGGT1_244060:E007	TGGT1_244060	E007	0.0213424763770142	8.93031841401845e-06	0.000494365184422144	46.5938606128339	0.671639107058714
TGGT1_204395:E005	TGGT1_204395	E005	0.0179082639477922	9.02839596847506e-06	0.000499434745161784	55.5462802079998	0.538848761195543
TGGT1_266640:E031	TGGT1_266640	E031	0.00760390776732664	9.0492867033587e-06	0.00050023024634962	131.162567003924	-0.389624309549266
TGGT1_233860:E011	TGGT1_233860	E011	0.0290510913313662	9.05995761026984e-06	0.000500460073975776	34.215617079443	0.794633248935333
TGGT1_297840:E013	TGGT1_297840	E013	0.131001423799465	9.09301124960766e-06	0.000501925075708408	7.5806921052994	2.03645039735422
TGGT1_282070:E019	TGGT1_282070	E019	0.030965668715541	9.1593614325782e-06	0.000504862162406751	32.0977372429805	-0.84513169021866
TGGT1_300260:E004	TGGT1_300260	E004	0.0276334252224768	9.15808679075398e-06	0.000504862162406751	35.9731624694487	-0.770668627049929
TGGT1_222350:E017	TGGT1_222350	E017	0.0244637604645588	9.20733798157022e-06	0.0005071428161218	40.6406381731896	0.71994030687853
TGGT1_209910:E003	TGGT1_209910	E003	0.0128765431132472	9.38471407877481e-06	0.000516172709857423	191.823780141603	-0.458085478950872
TGGT1_243690:E006	TGGT1_243690	E006	0.0102878009346479	9.37816650443648e-06	0.000516172709857423	96.8295106637229	0.455748892116026
TGGT1_244710:E003	TGGT1_244710	E003	0.0028308743794085	9.45805601962831e-06	0.00051983451386279	355.041315831766	-0.142559424095033
TGGT1_270690:E008	TGGT1_270690	E008	0.0667768260710317	9.48465535551509e-06	0.000520923848142754	14.8754195799231	1.31486331786912
TGGT1_221670:E013	TGGT1_221670	E013	0.0298539343872348	9.49571774227795e-06	0.000521158902973865	33.2944127135156	0.813153895014815
TGGT1_290225:E011	TGGT1_290225	E011	0.0958957388009813	9.51051692666836e-06	0.000521598564664109	10.3568450162426	1.70082401444884
TGGT1_263100:E009	TGGT1_263100	E009	0.00520587467641646	9.54564884686805e-06	0.00052315194040428	191.984628058196	-0.322638796730015
TGGT1_249790:E005	TGGT1_249790	E005	0.0136423915467921	9.67807288076859e-06	0.000530031422622677	72.9592474981473	0.519811400388332
No_genes_on_ref_contig_268+No_genes_on_ref_contig_269+No_genes_on_ref_contig_272+No_genes_on_ref_contig_271+No_genes_on_ref_contig_270:E001	No_genes_on_ref_contig_268+No_genes_on_ref_contig_269+No_genes_on_ref_contig_272+No_genes_on_ref_contig_271+No_genes_on_ref_contig_270	E001	0.00166680504134857	9.77689057883983e-06	0.000535061924078572	608.240873054148	-0.174502476336667
TGGT1_258630:E009	TGGT1_258630	E009	0.0418107031950334	9.82150643247804e-06	0.000537121060321932	23.7652119136008	0.882972139678832
TGGT1_214280:E004	TGGT1_214280	E004	0.0418388686041975	9.95399785337477e-06	0.000543635776434986	23.749200254243	0.979478897995795
TGGT1_254070:E004	TGGT1_254070	E004	0.00365824489232526	9.95478138714454e-06	0.000543635776434986	1234.511052009	-0.152755579102754
TGGT1_264940:E003	TGGT1_264940	E003	0.026127232048761	1.00255821965536e-05	0.000547113394344167	38.0497017344517	0.759608403736454
TGGT1_262140:E023	TGGT1_262140	E023	0.00152859669552585	1.00514818181394e-05	0.000548137479389906	664.505868388581	-0.139669369982526
TGGT1_260820:E002	TGGT1_260820	E002	0.0179850641453065	1.01402987182666e-05	0.000552588746535779	55.3086291191619	0.604588056035614
TGGT1_309220:E008	TGGT1_309220	E008	0.0115330222915722	1.01909361950512e-05	0.000554954616881043	86.3434300574671	0.471554393948217
TGGT1_219070:E036	TGGT1_219070	E036	0.00627950868965567	1.0297534012213e-05	0.00055996576142704	158.978743567454	-0.350148059704411
TGGT1_289620:E017	TGGT1_289620	E017	0.0288477503124507	1.02947833085944e-05	0.00055996576142704	34.4570839143555	-0.794022070335501
TGGT1_242290:E009	TGGT1_242290	E009	0.00724705490960301	1.03547611360157e-05	0.000562679477657734	137.652069886382	0.378674027314703
TGGT1_220208:E013	TGGT1_220208	E013	0.0803416100181657	1.04188209153461e-05	0.000564961850862703	12.362791317661	1.62353998154108
TGGT1_226020:E008	TGGT1_226020	E008	0.00884178307637938	1.04067409058802e-05	0.000564961850862703	112.727443086719	-0.42454920900784
TGGT1_270090:E021	TGGT1_270090	E021	0.0149612686627366	1.04162554425079e-05	0.000564961850862703	66.5128127703964	0.551287421825659
TGGT1_289570:E038	TGGT1_289570	E038	0.0148987495646667	1.04635924423583e-05	0.000566989458740115	81.097583228968	0.552314907522237
TGGT1_229740:E008	TGGT1_229740	E008	0.0324277697758334	1.04892652910265e-05	0.000567980040286543	30.6489742289302	0.849150188573545
TGGT1_236790:E011	TGGT1_236790	E011	0.0368038284262976	1.05737535153574e-05	0.000572006966122224	27.0013199496125	0.901358781877943
TGGT1_242790B:E002	TGGT1_242790B	E002	0.0223143312951699	1.05785220513513e-05	0.000572006966122224	44.5614160312719	0.67377466781178
TGGT1_206415:E015	TGGT1_206415	E015	0.126438490967168	1.05881186537785e-05	0.000572123258087466	7.85434007590079	2.01285390788024
TGGT1_268280:E021	TGGT1_268280	E021	0.0226914465717437	1.06128648590296e-05	0.000573057411927797	52.2836103636709	-0.677837282982664
TGGT1_244710:E001	TGGT1_244710	E001	0.0307344284358486	1.06417681629443e-05	0.0005742145648428	32.3395063948925	-0.778134933937828
TGGT1_313690:E014	TGGT1_313690	E014	0.0105019795661027	1.06715829911594e-05	0.000575419243713483	94.8482447348126	0.445177446315927
TGGT1_221670:E016	TGGT1_221670	E016	0.0385362348871701	1.07819505656024e-05	0.000580962647692282	25.7863801283324	0.93044089499359
TGGT1_215590:E004	TGGT1_215590	E004	0.0185297860802487	1.08264218091052e-05	0.000582950085876816	98.6339457612529	0.569685820530474
TGGT1_264950:E009	TGGT1_264950	E009	0.109096976337742	1.09378800090849e-05	0.000588539136035051	9.10322226257158	1.77716535612919
TGGT1_281520:E002	TGGT1_281520	E002	0.0187833355343214	1.09691061351255e-05	0.000589806303782112	52.9537439950685	0.612068421038716
TGGT1_209970:E036	TGGT1_209970	E036	0.0711647962817845	1.11076225850236e-05	0.000596836640954866	13.9577667106581	1.3991256646874
TGGT1_217520:E001	TGGT1_217520	E001	0.00142979221487231	1.11945439899566e-05	0.000601086776070088	711.56218358272	-0.160635728669948
TGGT1_203180:E010	TGGT1_203180	E010	0.107743100958979	1.12487820461475e-05	0.00060357728078201	9.21764795543902	1.66184325033815
TGGT1_257300:E019	TGGT1_257300	E019	0.0299955458064516	1.1261757420316e-05	0.000603851817798203	33.1370459472548	0.765808066682676
TGGT1_213900:E002	TGGT1_213900	E002	0.016049137585827	1.13192863324471e-05	0.000605668526411027	61.9946129470704	0.583582050933066
TGGT1_217350:E015	TGGT1_217350	E015	0.0203515315667547	1.13139734296916e-05	0.000605668526411027	48.8664366974889	0.654559650648494
TGGT1_223070:E013	TGGT1_223070	E013	0.00709773162478946	1.13114686418194e-05	0.000605668526411027	140.562172745209	0.385021941959459
TGGT1_266400:E002	TGGT1_266400	E002	0.0580682341541157	1.14036431152816e-05	0.000609757638169029	17.1076387417488	1.22378125812799
TGGT1_269250:E011	TGGT1_269250	E011	0.0229590598935149	1.14187846826365e-05	0.000610142669443489	58.3898224825135	-0.666480384008785
TGGT1_255260:E005	TGGT1_255260	E005	0.020019838119779	1.14493533588421e-05	0.000611350913157298	49.677466093406	-0.649338335585493
TGGT1_225300:E017	TGGT1_225300	E017	0.0180979398926788	1.14934209377149e-05	0.000613277767077224	54.9630132589617	0.606589904439314
TGGT1_218490:E012	TGGT1_218490	E012	0.0310214599097519	1.15303473492161e-05	0.000614821165351643	32.0399460781311	0.839030305091726
TGGT1_242030:E007	TGGT1_242030	E007	0.032235200736936	1.16174292247713e-05	0.000619034957936027	30.8322636563828	0.850451509133281
TGGT1_249810:E030	TGGT1_249810	E030	0.0227710951301152	1.16396767743626e-05	0.000619790605898613	43.6662043649619	-0.708996149791233
TGGT1_297060:E015	TGGT1_297060	E015	0.122693343293291	1.17197854353476e-05	0.000623624067517871	8.09415702306587	2.02320654434461
TGGT1_233838:E011	TGGT1_233838	E011	0.0178089688293257	1.17525564981005e-05	0.000624935075186537	55.8565838311373	0.612784044330522
TGGT1_218770:E009	TGGT1_218770	E009	0.124709043422285	1.18806331457253e-05	0.000631308581616941	7.96329312644162	2.46078595043201
TGGT1_211480:E012	TGGT1_211480	E012	0.0489507385998236	1.19638790579457e-05	0.000635292726451537	20.2963323692739	1.07713967055293
TGGT1_225450:E014	TGGT1_225450	E014	0.0302243825025053	1.21051039077476e-05	0.000642347975800832	32.8858698035399	0.787786549659497
TGGT1_249770:E005	TGGT1_249770	E005	0.0148875504606302	1.2266560899512e-05	0.00065046634909303	66.8429276566524	0.553472092547276
TGGT1_299670:E006	TGGT1_299670	E006	0.0358670987931981	1.23423167928539e-05	0.00065403213476725	54.2360905020499	0.799564708295713
TGGT1_277030:E029	TGGT1_277030	E029	0.125373341147368	1.25333400249182e-05	0.000663696931422909	7.92108754600212	2.17641665615544
TGGT1_242720:E008	TGGT1_242720	E008	0.00364167782734863	1.25533202078552e-05	0.00066429715207367	275.236356858716	-0.234387023490657
TGGT1_256780:E009	TGGT1_256780	E009	0.0133637109751576	1.25709565292324e-05	0.000664772599336978	74.4846462793621	0.504696609248622
TGGT1_290330:E042	TGGT1_290330	E042	0.002729694767924	1.27906467894952e-05	0.000675924984432219	368.369951453759	0.184707345533659
TGGT1_202680:E011	TGGT1_202680	E011	0.0240682165252708	1.28429763495957e-05	0.00067822389950095	41.3094974605386	0.711010785373033
TGGT1_263490:E004	TGGT1_263490	E004	0.0178894229292163	1.28533542247457e-05	0.000678305754510155	55.6048942909396	0.585535650350208
TGGT1_243800:E010	TGGT1_243800	E010	0.0246700921322225	1.28920590318502e-05	0.000679881358840271	40.300258329888	0.717470066600936
TGGT1_270530:E008	TGGT1_270530	E008	0.0280245942648085	1.29418136363283e-05	0.000682037129200654	35.4704274769067	0.759530427835642
TGGT1_249820:E023	TGGT1_249820	E023	0.0855091453269963	1.30368596763831e-05	0.000686575179543692	14.4173753720934	1.50693784686597
TGGT1_275320:E002	TGGT1_275320	E002	0.023632198572519	1.30577741233539e-05	0.000687205609805578	53.2410089217933	0.676141751706708
TGGT1_313480:E013	TGGT1_313480	E013	0.085708151617279	1.31235692938435e-05	0.000690195546770055	25.4821429154736	1.3030468689178
TGGT1_270070:E010	TGGT1_270070	E010	0.0261111186934432	1.31555764615107e-05	0.000691405628298975	38.0732135611617	0.701765074496987
TGGT1_313910:E007	TGGT1_313910	E007	0.010380004915491	1.31979758339736e-05	0.000693159855881768	95.9665187106637	-0.452474250044279
TGGT1_221510:E002	TGGT1_221510	E002	0.0125223562520323	1.32352306371099e-05	0.000694641677912304	79.5029721351437	0.490215949533458
TGGT1_314240:E018	TGGT1_314240	E018	0.0330425052230901	1.32443793669054e-05	0.000694647356597207	30.0781725479516	0.862957736142811
TGGT1_245720:E016	TGGT1_245720	E016	0.0402079222367203	1.33421839894448e-05	0.000699299721143909	24.7133624628305	0.941454771608508
TGGT1_247330:E011	TGGT1_247330	E011	0.0118614917071988	1.34848215313382e-05	0.000706293955012566	83.9454208700607	0.481577244795441
TGGT1_272010:E007	TGGT1_272010	E007	0.023628891641526	1.36190777993904e-05	0.000712839973345888	42.078676394776	0.675480740284393
TGGT1_249300:E019	TGGT1_249300	E019	0.00454352002724014	1.36937494559306e-05	0.00071626046762787	220.186454892738	0.287765471877782
TGGT1_309140:E018	TGGT1_309140	E018	0.046670937704996	1.37046164823665e-05	0.000716341235820134	21.288509801467	1.05363838744807
TGGT1_222192:E016	TGGT1_222192	E016	0.0277478848936308	1.38308973352516e-05	0.000722450481678265	35.8245887747171	0.749551254836296
TGGT1_219510:E007	TGGT1_219510	E007	0.0147852461289939	1.38710444906597e-05	0.000724055329842948	67.3065199616283	0.532540213380736
TGGT1_207480:E075	TGGT1_207480	E075	0.0643921883929889	1.3992224807296e-05	0.000729884981342977	15.4265969201659	1.30084422506111
TGGT1_262520:E006	TGGT1_262520	E006	0.0231751953169277	1.43128323348767e-05	0.000746102508897505	44.5928565616837	0.678123324027595
TGGT1_217020:E014	TGGT1_217020	E014	0.00358331909251451	1.44495544357334e-05	0.000752718924866744	279.762526284049	0.261502049807587
TGGT1_246620:E003	TGGT1_246620	E003	0.0806784572350169	1.46156192250597e-05	0.00076085388509208	12.3111523200724	1.38377063520006
TGGT1_264970:E008	TGGT1_264970	E008	0.0242059388313758	1.4654220476336e-05	0.000761763657277676	45.8170182364482	0.681741743763883
TGGT1_275320:E041	TGGT1_275320	E041	0.00801888606220767	1.46628375537005e-05	0.000761763657277676	124.345538741147	0.396016634118955
TGGT1_313910:E003	TGGT1_313910	E003	0.0158887037456313	1.46592077766693e-05	0.000761763657277676	206.056138683086	0.499604733420341
TGGT1_273130:E001	TGGT1_273130	E001	0.0597376819979196	1.4748520489331e-05	0.000765697343809951	16.6292668798829	1.04279084533399
TGGT1_207100:E021	TGGT1_207100	E021	0.0387568050872379	1.47739399210842e-05	0.000766499136878018	25.6394955198291	1.00481335422764
TGGT1_290670:E014	TGGT1_290670	E014	0.0201624692451242	1.48008935625171e-05	0.000767379391810474	49.3254404403114	0.641092093231567
TGGT1_204100:E003	TGGT1_204100	E003	0.0159991222705883	1.49422984603971e-05	0.000774188392988221	62.1888351977555	-0.558286129897753
TGGT1_207460B:E021	TGGT1_207460B	E021	0.019719727370749	1.49548682101326e-05	0.00077431752605253	50.4348238742513	0.632890625635957
TGGT1_226910:E024	TGGT1_226910	E024	0.0486675544869508	1.4983341185139e-05	0.000775178688083672	20.4145153999938	1.07368964457901
TGGT1_311060:E003	TGGT1_311060	E003	0.0410417096479119	1.49916775836164e-05	0.000775178688083672	24.2108727055589	0.925387592321373
TGGT1_232250:E003	TGGT1_232250	E003	0.0205279960258731	1.50141513039888e-05	0.000775818657528306	48.445659314245	0.650414865773036
TGGT1_246050:E017	TGGT1_246050	E017	0.0307961642450776	1.50291446523261e-05	0.000776071497077138	32.274603951001	0.812921560195849
TGGT1_311920:E010	TGGT1_311920	E010	0.0340058263958217	1.50686087547283e-05	0.000777586763523882	29.2252484962282	0.878887910146363
TGGT1_229940:E004	TGGT1_229940	E004	0.0417119464421447	1.52183458897504e-05	0.000784786606128023	23.8215247816026	0.925709831809886
TGGT1_318290:E009	TGGT1_318290	E009	0.0269986738465941	1.52826334831952e-05	0.000787573245438143	36.8199911263292	0.754238194643668
TGGT1_280490:E018	TGGT1_280490	E018	0.0708981085978509	1.53040720131548e-05	0.000788149451256552	14.0102953052036	1.33192903516171
TGGT1_258828:E003	TGGT1_258828	E003	0.0388756922416006	1.53714098337445e-05	0.000791087084658692	25.5610167603288	-0.884539541254256
TGGT1_202572:E009	TGGT1_202572	E009	0.0558522155521755	1.55950898886835e-05	0.000802061527293692	17.7868292452358	1.23128578327075
TGGT1_280670:E008	TGGT1_280670	E008	0.0200340762945219	1.57009707685924e-05	0.000806574445919338	49.6420994786736	-0.657023165821838
TGGT1_288000:E023	TGGT1_288000	E023	0.0345529958654659	1.57038324127091e-05	0.000806574445919338	28.7619845367061	-0.857621679840944
TGGT1_225010:E007	TGGT1_225010	E007	0.00571022158032078	1.58738400227367e-05	0.000814761687259198	174.924723090771	0.311535988707498
TGGT1_207100:E013	TGGT1_207100	E013	0.00622589091079116	1.60250863522734e-05	0.000821921209945039	160.355513500889	0.327200318845126
TGGT1_283540:E004	TGGT1_283540	E004	0.0125371411504791	1.60347214715256e-05	0.000821921209945039	289.336852040568	-0.431192635705537
TGGT1_313590A:E026	TGGT1_313590A	E026	0.0420111150462406	1.61677084020034e-05	0.000828185473656488	23.6517479554201	0.98045156981046
TGGT1_295910:E001	TGGT1_295910	E001	0.00229194245420676	1.62812792301845e-05	0.000833447469826572	439.803244737297	-0.186823073676665
TGGT1_270710:E002	TGGT1_270710	E002	0.107646369946366	1.64069107345285e-05	0.000839319440818219	12.93891919363	1.61946064553988
TGGT1_201260:E005	TGGT1_201260	E005	0.00512828303823019	1.64714674168822e-05	0.000842061305329992	194.909070136747	-0.329618635368659
TGGT1_278060:E002	TGGT1_278060	E002	0.0530044255379125	1.65387561794914e-05	0.000844939101438552	18.7430922119508	1.10574727691351
TGGT1_252220:E006	TGGT1_252220	E006	0.0284969838577016	1.6586120690317e-05	0.000846795850818528	34.88172709136	0.753711008213333
TGGT1_295090:E010	TGGT1_295090	E010	0.0086431560638438	1.67641949465295e-05	0.000855319021983058	115.328404121413	-0.384948312902899
TGGT1_210790:E020	TGGT1_210790	E020	0.0193291489162808	1.68193917720769e-05	0.000856429162088186	51.4557691457695	0.614645653381405
TGGT1_220630:E017	TGGT1_220630	E017	0.0103745003918372	1.68142804817793e-05	0.000856429162088186	96.0176068348438	-0.446564973474154
TGGT1_280610:E033	TGGT1_280610	E033	0.138462920103678	1.68021899543628e-05	0.000856429162088186	7.17208153171199	2.15740734255494
TGGT1_223750:E007	TGGT1_223750	E007	0.0342811585099661	1.68738176229286e-05	0.000858631473306599	28.9902867346347	0.837330483816065
TGGT1_204060:E002	TGGT1_204060	E002	0.0514565320135901	1.70102268744249e-05	0.000864999869192711	19.3072924924403	-1.06758569312507
TGGT1_212260:E004	TGGT1_212260	E004	0.0103431790718027	1.71705858086176e-05	0.000872576919164519	96.3093421115111	0.436135846936056
TGGT1_289200:E033	TGGT1_289200	E033	0.016919527380487	1.72121150455767e-05	0.000874109242403818	58.7989085207577	-0.540913535336129
TGGT1_304955:E031	TGGT1_304955	E031	0.0033542803579222	1.73498384004394e-05	0.000880521488226264	1225.49959927531	-0.160213805259531
TGGT1_272155:E010	TGGT1_272155	E010	0.0547767760424578	1.73906591328968e-05	0.000882010611085408	18.1362605964333	1.14428061576834
TGGT1_316100:E015	TGGT1_316100	E015	0.0514511931104474	1.74542932056576e-05	0.000884654041585165	19.3092972851925	1.07667803476295
TGGT1_233830:E003	TGGT1_233830	E003	0.0393028873472547	1.7553254089816e-05	0.000888497618247163	25.282941982958	0.928844911184958
TGGT1_285480:E010	TGGT1_285480	E010	0.118047637738057	1.75465422981854e-05	0.000888497618247163	8.4127917003172	-1.92699995643938
TGGT1_306220:E018	TGGT1_306220	E018	0.0202926910570846	1.77807090869457e-05	0.000899418264722612	49.0083708667735	0.630404759331991
TGGT1_204070:E016	TGGT1_204070	E016	0.01228503410459	1.79380029491051e-05	0.000906777850394993	81.0431379477663	0.472200002483754
TGGT1_227580:E003	TGGT1_227580	E003	0.0200202288768509	1.79913329598097e-05	0.000908875772934185	49.6764948080899	-0.650369215989079
TGGT1_268210:E016	TGGT1_268210	E016	0.0468739801232236	1.81356495896581e-05	0.000915564328200105	21.1962271211211	0.967321225078081
TGGT1_252380:E001	TGGT1_252380	E001	0.0319383764480495	1.8257011494726e-05	0.000921086009337006	31.1191181951516	-0.776847941688433
TGGT1_278660:E008	TGGT1_278660	E008	0.125992692227394	1.82739479101022e-05	0.000921335522026592	22.7314347464004	1.57887184480438
TGGT1_285680:E004	TGGT1_285680	E004	0.0338079485180859	1.83576202530249e-05	0.000924947191725688	29.396478696228	0.781102092410355
TGGT1_320440B:E007	TGGT1_320440B	E007	0.0704860108754916	1.86049747940999e-05	0.000936795837650232	14.0922468875216	1.40854358279031
TGGT1_316100:E014	TGGT1_316100	E014	0.0430159895045661	1.87621373550743e-05	0.000944090601147245	23.0987878035398	0.952811969855947
TGGT1_263100:E033	TGGT1_263100	E033	0.00381209237442711	1.88497564142333e-05	0.000947878752356314	262.819828369119	0.259483316562473
TGGT1_214940:E005	TGGT1_214940	E005	0.0142977486604859	1.9039851821272e-05	0.000956811703329677	483.383881173879	0.437202332795834
TGGT1_217020:E030	TGGT1_217020	E030	0.00421927059571639	1.91489065083224e-05	0.000961663091098016	237.247306674659	-0.281337820173309
TGGT1_273130:E002	TGGT1_273130	E002	0.0576863749115734	1.92119873700841e-05	0.0009642008318453	17.2209518431557	1.00196709769661
TGGT1_200330:E039	TGGT1_200330	E039	0.00788431798039449	1.92572842417137e-05	0.000965843308929868	126.477179615418	0.388816501529034
TGGT1_233260:E005	TGGT1_233260	E005	0.00570827082563352	1.93051020859352e-05	0.000967609999332681	174.984865931868	-0.294415913214036
TGGT1_232980:E008	TGGT1_232980	E008	0.0947541479753307	1.93572784827454e-05	0.000969592703245571	10.4816689842846	1.6968020286829
TGGT1_311880:E021	TGGT1_311880	E021	0.011919336932026	1.94914069670468e-05	0.000975675073046888	83.5368454909754	-0.484612105994273
TGGT1_225220:E032	TGGT1_225220	E032	0.0125083205847316	1.95061945340233e-05	0.000975779602480956	79.5924298478574	0.488192613678722
TGGT1_245720:E015	TGGT1_245720	E015	0.0499055678678784	1.95626045720114e-05	0.000977328899544631	19.9077394930698	1.030315524784
TGGT1_263700:E002	TGGT1_263700	E002	0.00898308224303838	1.95565873204957e-05	0.000977328899544631	110.947458620958	-0.413200550133542
TGGT1_234280:E012	TGGT1_234280	E012	0.0727291926959679	1.95871130238757e-05	0.000977917481101715	13.6573941973084	1.31954019561123
TGGT1_237010:E010	TGGT1_237010	E010	0.0442668002432925	1.96457294671308e-05	0.000980207087705149	22.4455948273057	0.997966853472623
TGGT1_282055:E010	TGGT1_282055	E010	0.00953659045312109	1.96855303200567e-05	0.000981555543933936	104.484618901826	-0.447494050568726
TGGT1_260310:E046	TGGT1_260310	E046	0.0863828549082493	1.97784709016641e-05	0.000985550174235517	11.4978452379313	1.47675960511578
TGGT1_249300:E023	TGGT1_249300	E023	0.0225674108212077	1.97949330053877e-05	0.000985731216678531	87.212133438851	-0.590646107098169
TGGT1_268290:E024	TGGT1_268290	E024	0.0905307301604086	1.99378948298395e-05	0.000992207270103872	10.9708438308639	1.63103787737247
TGGT1_207430:E042	TGGT1_207430	E042	0.0235385165384011	2.01060732328142e-05	0.000999929028472329	42.2404729403523	-0.687879103295562
TGGT1_299040:E003	TGGT1_299040	E003	0.00521554008061948	2.05048997136039e-05	0.00101910412632224	191.626472595575	0.290111974557991
TGGT1_206550:E017	TGGT1_206550	E017	0.0145228654152918	2.06287508508482e-05	0.001024596851407	68.5254264500644	0.516528050635072
TGGT1_222840:E020	TGGT1_222840	E020	0.0147209131892162	2.06791061528944e-05	0.00102643441826224	67.6013525707832	-0.525812243894607
TGGT1_201780:E008	TGGT1_201780	E008	0.000303689977077888	2.07673820947983e-05	0.00103015063784249	3688.51073469693	-0.0568390867417413
TGGT1_306040:E012	TGGT1_306040	E012	0.0120955563776896	2.08509814123982e-05	0.00103363023147383	82.3163183621044	-0.469014411634102
TGGT1_222110:E025	TGGT1_222110	E025	0.0183428877024593	2.08664279545552e-05	0.00103372902949333	54.2276624485017	-0.577746585420628
TGGT1_312840:E013	TGGT1_312840	E013	0.155958888927504	2.10144096485816e-05	0.00104038930036602	6.36731625115995	2.23229582424001
TGGT1_304955:E032	TGGT1_304955	E032	0.00501596423585785	2.11234545372339e-05	0.00104511453720376	580.452362556244	-0.219095841991881
TGGT1_208740:E014	TGGT1_208740	E014	0.0344395135762895	2.12655610638887e-05	0.00105079222859551	28.8568537964973	1.03955374027501
TGGT1_267300:E002	TGGT1_267300	E002	0.0268555102719172	2.12650946910185e-05	0.00105079222859551	37.0165268388749	0.725751434203261
TGGT1_236220:E026	TGGT1_236220	E026	0.0184932490926576	2.13063977207083e-05	0.00105213347150775	53.7859338407924	0.603143609570308
TGGT1_202850:E001	TGGT1_202850	E001	0.00287847605619607	2.14127322136111e-05	0.00105574165377506	349.098682264373	-0.0850098898082141
TGGT1_206400:E021	TGGT1_206400	E021	0.00987468697254921	2.14375872315523e-05	0.00105574165377506	100.894649112733	0.427215730346937
TGGT1_242070:E014	TGGT1_242070	E014	0.000395652749215232	2.14240418085008e-05	0.00105574165377506	2749.21651988628	-0.0771612590062984
TGGT1_248445:E010	TGGT1_248445	E010	0.00249567396043063	2.14481658776744e-05	0.00105574165377506	403.396769205394	-0.204154912712419
TGGT1_262400:E002	TGGT1_262400	E002	0.0395885629534535	2.14029303946094e-05	0.00105574165377506	122.473597218801	-0.743880045650545
TGGT1_257300:E016	TGGT1_257300	E016	0.046049713578153	2.15348114031071e-05	0.00105932797937295	21.5759135083535	0.950545140036243
TGGT1_201780:E003	TGGT1_201780	E003	0.000234260372493455	2.16242520943268e-05	0.00106304712614958	4970.66322343659	-0.0462604212233341
TGGT1_233260:E017	TGGT1_233260	E017	0.0996135951145568	2.16391290587554e-05	0.00106309831169283	9.97016474903391	1.49909926183783
TGGT1_200400:E005	TGGT1_200400	E005	0.0157204702038948	2.17301616073658e-05	0.00106688845202886	63.2935851302011	0.546791627668254
TGGT1_228460:E013	TGGT1_228460	E013	0.0606501318709398	2.17811561680238e-05	0.00106870925701306	16.3789456653988	1.19630664734628
TGGT1_257390:E012	TGGT1_257390	E012	0.0334182977738578	2.21832685778576e-05	0.00108774461245491	29.7395902944536	0.901406912697295
TGGT1_257300:E006	TGGT1_257300	E006	0.0510640288462643	2.22987404560613e-05	0.00109270938802448	27.6380198557836	1.00122869070897
TGGT1_270840:E014	TGGT1_270840	E014	0.0836096048312855	2.23261245678562e-05	0.00109335400472936	11.87937523546	1.47610569274931
TGGT1_320740:E014	TGGT1_320740	E014	0.00220949116116174	2.26634923310697e-05	0.00110916863709707	456.475843410204	0.182513348262276
TGGT1_240640:E006	TGGT1_240640	E006	0.0103536382444117	2.2740720268592e-05	0.00111193593089145	96.2117255856861	-0.440945756247896
TGGT1_271145:E017	TGGT1_271145	E017	0.098139618231311	2.27634501515188e-05	0.00111193593089145	10.1199611745179	1.90768492688665
TGGT1_311335:E015	TGGT1_311335	E015	0.0157208666177631	2.27569957840638e-05	0.00111193593089145	63.2919856205936	-0.58843050160234
TGGT1_318410:E005	TGGT1_318410	E005	0.0234610213082959	2.28066784411539e-05	0.00111333974039577	42.3802051076289	0.696259633734386
TGGT1_213060:E019	TGGT1_213060	E019	0.0227506598583997	2.28910398274975e-05	0.00111674846173043	51.1428132183694	-0.642368020926773
TGGT1_246620:E004	TGGT1_246620	E004	0.0618610855720807	2.29323318235069e-05	0.00111805303319974	16.0581426879823	1.12224138075408
TGGT1_304760:E014	TGGT1_304760	E014	0.0278314824759271	2.29909819649838e-05	0.00112020170021779	75.2670706481658	-0.648808258175182
TGGT1_277685:E005	TGGT1_277685	E005	0.0097800256452662	2.32982048971635e-05	0.00113397259478775	101.874672742263	-0.405451535475576
TGGT1_318760:E008	TGGT1_318760	E008	0.0333801784968048	2.33031316575329e-05	0.00113397259478775	29.773587278951	0.803938468184358
TGGT1_282055:E008	TGGT1_282055	E008	0.0136504734735254	2.33547841342853e-05	0.00113576680286461	72.9159415710992	-0.533465994914256
TGGT1_209020:E014	TGGT1_209020	E014	0.0549756303548895	2.34831018120415e-05	0.00114128468939395	18.0706180583903	1.1893586950317
TGGT1_202160:E013	TGGT1_202160	E013	0.0401304328769969	2.36817315693491e-05	0.00115021062490144	24.7611235115641	0.991215675978223
TGGT1_208040:E012	TGGT1_208040	E012	0.0196556896674352	2.37632636043979e-05	0.00115271331159793	50.599428282854	0.614527392964905
TGGT1_254490:E005	TGGT1_254490	E005	0.0277378481446725	2.37583320615392e-05	0.00115271331159793	35.8375678096055	0.734852322434922
TGGT1_313480:E030	TGGT1_313480	E030	0.0785892190103635	2.39092030833903e-05	0.00115906084373405	12.6385793462739	1.3817781566351
TGGT1_249460:E004	TGGT1_249460	E004	0.0691707705603144	2.39298047076825e-05	0.00115932812378575	14.3603362371025	1.23839138636423
TGGT1_200290:E008	TGGT1_200290	E008	0.00343042660327915	2.39896432799333e-05	0.00116149478304993	481.315165013201	0.204970408406747
TGGT1_257710:E004	TGGT1_257710	E004	0.0516012941198634	2.40982025836583e-05	0.00116601611581899	19.2530916117487	1.04991404217294
TGGT1_208740:E020	TGGT1_208740	E020	0.0367392467854853	2.43023420941177e-05	0.00117450558313874	27.0488285380997	-0.827046105186684
TGGT1_219140:E002	TGGT1_219140	E002	0.0188643077100161	2.43042268333042e-05	0.00117450558313874	52.7260313435002	-0.598738096510848
TGGT1_232290:E007	TGGT1_232290	E007	0.0390064774496072	2.44859448416633e-05	0.0011825433964795	25.4752370484816	0.839926771989472
TGGT1_214385:E001	TGGT1_214385	E001	0.00723464028383606	2.46965253918188e-05	0.00119183934042013	137.889413143875	0.304344954612615
TGGT1_237530:E013	TGGT1_237530	E013	0.0498327537105244	2.47094507761791e-05	0.00119183934042013	19.9368482645881	1.08173523285628
TGGT1_206550:E023	TGGT1_206550	E023	0.0319264461550577	2.47331917477283e-05	0.00119223604411556	31.130759393878	0.99911314699122
TGGT1_263330:E003	TGGT1_263330	E003	0.0656529432953687	2.47957149770694e-05	0.00119450053397685	15.1301990786428	1.15332762087238
TGGT1_257390:E010	TGGT1_257390	E010	0.0351592340065092	2.50390285062054e-05	0.00120546606098453	28.265564430039	0.941013078220172
TGGT1_206400:E012	TGGT1_206400	E012	0.131956798589622	2.51215390830439e-05	0.00120801160495231	7.52579309617072	1.96279274692414
TGGT1_242870:E026	TGGT1_242870	E026	0.0639851455173381	2.51233461055715e-05	0.00120801160495231	15.5247865275899	1.20565916589271
TGGT1_263130:E010	TGGT1_263130	E010	0.0504656574280589	2.5335841508021e-05	0.00121746720072033	19.6866435864303	1.01371816323707
TGGT1_213115:E001	TGGT1_213115	E001	0.0107847504184113	2.54306631155445e-05	0.00122125991363068	92.3533837695318	0.403272486765227
TGGT1_280700:E028	TGGT1_280700	E028	0.0265067356808226	2.55283493314711e-05	0.00122518537013257	37.5042240669371	0.72432976411949
TGGT1_216910:E005	TGGT1_216910	E005	0.0226209372070554	2.58233198641249e-05	0.00123856830736565	43.9565039641651	0.646367084212746
TGGT1_271870:E019	TGGT1_271870	E019	0.0226871279120086	2.58461132991593e-05	0.00123888821432782	43.828063451957	-0.648539233939227
TGGT1_228470:E004	TGGT1_228470	E004	0.00886570114190506	2.58664138018138e-05	0.00123908830254986	112.422135823529	0.406811545405237
TGGT1_289630:E011	TGGT1_289630	E011	0.0212840677178185	2.61676237226469e-05	0.00125273626416014	46.7219332446862	-0.644745892015154
TGGT1_294785:E001	TGGT1_294785	E001	0.0670134665313978	2.62063885514501e-05	0.00125381088239587	14.82286386568	1.17838094911387
TGGT1_224470:E001	TGGT1_224470	E001	0.0126952831346454	2.64718946984944e-05	0.001265725558773	78.4170813500734	-0.476405892337141
TGGT1_222010:E005	TGGT1_222010	E005	0.0195033846640875	2.65525430549968e-05	0.00126879213353034	50.9952678970046	0.597874249443447
TGGT1_234310:E003	TGGT1_234310	E003	0.0214561740361513	2.67726000702761e-05	0.00127851228812915	46.3465587944699	0.633204038361785
TGGT1_269240:E006	TGGT1_269240	E006	0.0407737713530097	2.69160471240771e-05	0.00128456416948616	24.3701053976788	0.849087818146881
TGGT1_290730:E008	TGGT1_290730	E008	0.0521712995572483	2.70342735354009e-05	0.00128940563354414	19.0425997488783	1.06340508479448
TGGT1_240840:E013	TGGT1_240840	E013	0.0386110312219669	2.70718851366816e-05	0.00129039853489281	25.7363826846721	0.861214286540171
TGGT1_290880:E010	TGGT1_290880	E010	0.170480229947531	2.70895530142097e-05	0.0012904401642609	5.8248445565845	2.5403819612239
TGGT1_237530:E006	TGGT1_237530	E006	0.185557326352583	2.71432268377906e-05	0.00129139574026955	5.35147016783743	14.442843548907
TGGT1_315590:E014	TGGT1_315590	E014	0.0560167434042503	2.71293003144298e-05	0.00129139574026955	17.7345549897956	1.09157113858937
TGGT1_201380:E002	TGGT1_201380	E002	0.016829345056964	2.73424604806492e-05	0.00130006970046513	59.1146381335907	-0.566329336375952
TGGT1_319860:E023	TGGT1_319860	E023	0.0848806297991355	2.74515231659403e-05	0.00130444816666751	17.064498005682	1.29567090946715
TGGT1_275320:E040	TGGT1_275320	E040	0.0134361836542109	2.75358458603124e-05	0.00130764634633425	74.0818527294441	0.497749011302367
TGGT1_282055:E025	TGGT1_282055	E025	0.00378859984067893	2.75979330140835e-05	0.0013097852865986	264.464521970796	0.256271238888972
TGGT1_254450:E010	TGGT1_254450	E010	0.0280337023732085	2.77088089168158e-05	0.00131423564860579	35.4588889774566	0.716348199387684
TGGT1_217020:E023	TGGT1_217020	E023	0.00348836964506815	2.78546214606878e-05	0.00132033655100238	287.453460936967	-0.241232571008398
TGGT1_250220:E019	TGGT1_250220	E019	0.00192242331340539	2.8026569914333e-05	0.00132766803483823	736.147335465221	0.167865156720526
TGGT1_288400:E016	TGGT1_288400	E016	0.0121252084303757	2.80914244641521e-05	0.00132992038296491	86.8967297609431	0.481376920513141
TGGT1_207750:E024	TGGT1_207750	E024	0.0201301056303727	2.82914765258636e-05	0.00133774288111863	49.4048782799919	-0.62184150738551
TGGT1_301380:E006	TGGT1_301380	E006	0.0413253275240883	2.8278134885789e-05	0.00133774288111863	24.0445732927413	0.91037118865382
TGGT1_313180:E012	TGGT1_313180	E012	0.00130723679642217	2.83454935011888e-05	0.00133947274548022	780.081833806484	0.145092731530777
TGGT1_249180:E016	TGGT1_249180	E016	0.00101521756685703	2.8685333847854e-05	0.00135469883028123	1012.36541422942	-0.12417767000748
TGGT1_294190:E010	TGGT1_294190	E010	0.0133712518458571	2.9154529149641e-05	0.00137601139820084	74.4425310683168	0.48529540921586
TGGT1_289570:E039	TGGT1_289570	E039	0.0280953835019463	2.91915336373924e-05	0.00137691213633906	35.3809460928137	0.749716087466541
TGGT1_285268:E006	TGGT1_285268	E006	0.0521700207677909	2.92126309248e-05	0.00137706191556372	19.0430668294193	1.06779883961161
TGGT1_254010:E005	TGGT1_254010	E005	0.0147417294278219	2.93891312505911e-05	0.0013845326044768	67.5056711756847	0.518943256911884
TGGT1_203480:E008	TGGT1_203480	E008	0.0182477216571573	2.94805781650949e-05	0.00138798969636728	54.5110082080405	0.5652402274175
TGGT1_313860:E011	TGGT1_313860	E011	0.0997019398866082	2.98613676643472e-05	0.0014050568935857	13.6288983032738	1.38931646789451
TGGT1_259230:E019	TGGT1_259230	E019	0.0343478388439206	2.99040802896951e-05	0.00140620551849406	28.9339505270124	0.837837104733032
TGGT1_290710:E004	TGGT1_290710	E004	0.0142718566378701	3.01515771722093e-05	0.00141647232896284	69.733551915771	0.507631474372463
TGGT1_318330:E007	TGGT1_318330	E007	0.0461457826000837	3.0159281728636e-05	0.00141647232896284	21.5309618632768	0.980020489079526
TGGT1_255195:E012	TGGT1_255195	E012	0.00304583595837339	3.03034994627812e-05	0.00142237629091125	329.696796346867	0.189036082226256
TGGT1_280370:E005	TGGT1_280370	E005	0.0148722214186415	3.03263544590744e-05	0.00142258003514768	66.9119840641623	-0.537326281598155
TGGT1_206550:E035	TGGT1_206550	E035	0.0297364729243109	3.06563243380492e-05	0.00143718120388205	33.426081194286	0.887640223159449
TGGT1_220250:E009	TGGT1_220250	E009	0.0112851667569261	3.06841526964605e-05	0.00143760868337679	88.2456056433199	0.425668890085747
TGGT1_242720:E007	TGGT1_242720	E007	0.0501044280089683	3.10001810180247e-05	0.0014515301090079	19.8286729160007	-0.975902732276252
TGGT1_223855:E013	TGGT1_223855	E013	0.0230406061333225	3.10241953184938e-05	0.00145176985121018	43.1546647323595	0.632241634050625
TGGT1_318650:E011	TGGT1_318650	E011	0.00996078084867668	3.14338541765704e-05	0.00147004446339935	100.019554704492	0.421966257002554
TGGT1_304955:E033	TGGT1_304955	E033	0.00262441569203586	3.15998994819468e-05	0.00147691087378002	2342.16819755918	-0.11283216056037
TGGT1_227840:E009	TGGT1_227840	E009	0.0178432990069116	3.17348024448412e-05	0.00148231429510897	55.7489084578614	0.573074972707557
TGGT1_244640:E017	TGGT1_244640	E017	0.0164668456042756	3.18202838432954e-05	0.00148540410064841	60.4187158617203	0.547742457445546
TGGT1_206400:E005	TGGT1_206400	E005	0.00566208419211286	3.20061355199407e-05	0.00149317269881341	176.421005630302	-0.31678865866444
TGGT1_240910:E024	TGGT1_240910	E024	0.0763366464097343	3.20778009558275e-05	0.00149560800488041	13.0116923978506	1.40627466855912
TGGT1_225150:E017	TGGT1_225150	E017	0.0144573331699433	3.2408427459475e-05	0.00151010693796463	68.8367822450776	-0.531504393846007
TGGT1_232030:E013	TGGT1_232030	E013	0.0103125650653604	3.24684621821536e-05	0.00151198741132736	96.5962075701598	-0.447155782933728
TGGT1_206550:E025	TGGT1_206550	E025	0.0299516063630788	3.24911128811329e-05	0.00151212576647342	33.185714576126	0.878544157697027
TGGT1_243310:E001	TGGT1_243310	E001	0.067933327398043	3.31420771195872e-05	0.00154148776007126	15.8717078056155	1.15237593653856
TGGT1_278060:E015	TGGT1_278060	E015	0.0321877809454253	3.34752228681559e-05	0.00155604095554779	30.8777352407936	0.815324219027964
TGGT1_217350:E013	TGGT1_217350	E013	0.0292700401779898	3.35981349838398e-05	0.00156081009537684	33.9593715601436	0.727589141577212
TGGT1_217630:E001	TGGT1_217630	E001	0.00592029304956404	3.37164469431322e-05	0.00156535989955858	168.681410378486	0.275330586509139
TGGT1_219070:E040	TGGT1_219070	E040	0.00693809917046973	3.41103061169925e-05	0.00158268936661314	143.81241420728	-0.346731774072176
TGGT1_225730:E006	TGGT1_225730	E006	0.0167263857235058	3.41589148375504e-05	0.00158398825550565	59.4792711520152	-0.542360043029296
TGGT1_239020:E060	TGGT1_239020	E060	0.0677993795639877	3.4244931758839e-05	0.00158701919273457	14.6509534870345	1.22604874082943
TGGT1_220630:E012	TGGT1_220630	E012	0.00328750656362869	3.43552723414782e-05	0.00159117303249075	709.977639413674	0.203939032862513
TGGT1_295760:E028	TGGT1_295760	E028	0.0704193891685057	3.46290675006498e-05	0.00160288774671532	14.1055856862446	1.19035547113827
TGGT1_205500:E015	TGGT1_205500	E015	0.0461817710139681	3.47901088493064e-05	0.00160937242242875	21.5141707169907	0.977265194795202
TGGT1_269430:E052	TGGT1_269430	E052	0.0167991229309351	3.49096412209369e-05	0.00161385570314884	59.2212061525942	-0.556741733124647
TGGT1_277840:E011	TGGT1_277840	E011	0.186326013395643	3.492903203322e-05	0.00161385570314884	5.32938861272293	2.60757589292655
TGGT1_213060:E011	TGGT1_213060	E011	0.00177765980867418	3.50651557429106e-05	0.00161917149748679	569.559767662442	0.134656657055978
TGGT1_293470:E006	TGGT1_293470	E006	0.00741859905808989	3.52383070565508e-05	0.00162618966925177	134.454186801534	0.339716979869444
TGGT1_214760:E007	TGGT1_214760	E007	0.0304166108658742	3.53402596843469e-05	0.00162991568629421	32.6777999279281	-0.716204514665801
No_genes_on_ref_contig_276+No_genes_on_ref_contig_275+No_genes_on_ref_contig_274:E001	No_genes_on_ref_contig_276+No_genes_on_ref_contig_275+No_genes_on_ref_contig_274	E001	0.0179075205740532	3.53982903472391e-05	0.00163161273869875	55.5485904891548	0.464743323682116
TGGT1_236790:E015	TGGT1_236790	E015	0.0191927417953847	3.55006119850082e-05	0.0016353480354269	51.8221358705878	0.579364670395732
TGGT1_221270:E001	TGGT1_221270	E001	0.00209919053531993	3.55697903103514e-05	0.0016375530126282	646.060652919171	0.0914086267425751
TGGT1_297710:E008	TGGT1_297710	E008	0.0229437039909304	3.56432056204879e-05	0.00163995029356972	44.0185776210536	0.64763146127169
TGGT1_213060:E021	TGGT1_213060	E021	0.0061659639325151	3.57495105686146e-05	0.00164385705778614	161.922783549775	-0.309314255008408
TGGT1_272695:E016	TGGT1_272695	E016	0.0151095501506013	3.58582075295325e-05	0.00164786907413079	65.8585771445083	0.528333639910737
TGGT1_295910:E011	TGGT1_295910	E011	0.00132174905830828	3.60509734001817e-05	0.0016557373838313	771.28713530537	-0.117450182155996
TGGT1_265520:E010	TGGT1_265520	E010	0.0060237077833085	3.61793974351744e-05	0.00166064298729181	165.768802377313	0.321644523907864
TGGT1_315670:E014	TGGT1_315670	E014	0.0640185980779637	3.62592104375763e-05	0.00166331280739824	15.5166697598772	1.20650229906057
TGGT1_213930:E003	TGGT1_213930	E003	0.0126424958998162	3.64541344191691e-05	0.00167125675797476	78.7453991069635	-0.429351409217741
TGGT1_233680:E003	TGGT1_233680	E003	0.028906470380865	3.71086264696209e-05	0.00170024778297332	34.3870047332228	0.713742015804857
TGGT1_249300:E017	TGGT1_249300	E017	0.0208388248830447	3.7447342678132e-05	0.00171474461821194	47.7218518011497	-0.629117011501196
TGGT1_277030:E026	TGGT1_277030	E026	0.0899009535073587	3.75465570944001e-05	0.00171826373285433	11.04772661552	1.48031707541322
TGGT1_204130:E003	TGGT1_204130	E003	0.000481243532760136	3.79075357202741e-05	0.00173375078698732	2367.83367967724	-0.0842602473641852
TGGT1_217020:E021	TGGT1_217020	E021	0.00330253741065474	3.80548429287316e-05	0.00173945268656452	303.799210005178	-0.239126536083204
TGGT1_249860:E015	TGGT1_249860	E015	0.0634385037697887	3.80842012655942e-05	0.00173975967458053	15.6586345373828	1.10604001086332
TGGT1_254420:E007	TGGT1_254420	E007	0.0191007828186207	3.82658136826448e-05	0.00174701742479702	52.0720805901842	0.579579126113827
TGGT1_237220:E011	TGGT1_237220	E011	0.00581469971357132	3.84071610556363e-05	0.00175242935512585	171.762914345715	0.322075586261862
TGGT1_281920:E003	TGGT1_281920	E003	0.0178167567798166	3.86004721333605e-05	0.00176020443757331	55.8321207433368	0.553115476335657
TGGT1_313480:E018	TGGT1_313480	E018	0.121204381003882	3.9325589085634e-05	0.00179220657685223	8.19361983436197	1.77916445654039
TGGT1_249380:E002	TGGT1_249380	E002	0.00775252399258463	3.93543191649386e-05	0.00179245276922133	128.636927344287	-0.317458345474238
TGGT1_210820:E008	TGGT1_210820	E008	0.0304132577949946	3.94945337550328e-05	0.00179777339463001	32.6814067596644	0.738243710460428
TGGT1_257060:E005	TGGT1_257060	E005	0.0280806096383127	3.96067016907343e-05	0.00180177174835496	35.3995837483112	0.70098788162793
TGGT1_318260:E003	TGGT1_318260	E003	0.0512733006459422	3.96292704650088e-05	0.00180177174835496	19.3763359371767	0.996942713450495
TGGT1_304970:E014	TGGT1_304970	E014	0.184247806783263	3.98387282306878e-05	0.00181022374988844	35.2984524289176	1.60666439231097
TGGT1_297170:E004	TGGT1_297170	E004	0.043852922194774	4.00005608283803e-05	0.00181650300967509	22.6576002742042	0.932030990247207
TGGT1_263630:E005	TGGT1_263630	E005	0.000934480961787533	4.0365938284804e-05	0.0018320127584108	1103.18641546908	-0.0930325885501672
TGGT1_306900:E003	TGGT1_306900	E003	0.0121207463086843	4.07703634824218e-05	0.00184927533583167	82.1447558661758	-0.39112330223444
TGGT1_210690:E002	TGGT1_210690	E002	0.00118435416891653	4.07979632029249e-05	0.00184943545641483	1101.62615605103	0.13563303865725
TGGT1_313180:E014	TGGT1_313180	E014	0.0109910217404765	4.08275107298934e-05	0.0018496836332269	90.6147026787683	0.438277457449888
TGGT1_258480:E012	TGGT1_258480	E012	0.0558410257493522	4.08857460570585e-05	0.00185014020599894	17.7903956955178	1.13247739223176
TGGT1_280370:E006	TGGT1_280370	E006	0.0146519931385002	4.08827054076029e-05	0.00185014020599894	67.9200868717701	-0.524909791721202
TGGT1_249820:E018	TGGT1_249820	E018	0.0732404773057734	4.0928009897086e-05	0.0018509626229914	13.5620083004542	1.28571653498113
TGGT1_250720:E001	TGGT1_250720	E001	0.0413555748900941	4.10592989199502e-05	0.00185580785359542	141.865945651316	-0.734624425786858
TGGT1_290670:E004	TGGT1_290670	E004	0.0401196981052088	4.13008169092649e-05	0.00186562661308477	45.203312919332	0.784124969033626
TGGT1_244310:E013	TGGT1_244310	E013	0.0461483631368785	4.14332693322532e-05	0.00187051005621759	21.5297569876698	0.953413726673493
TGGT1_245660:E004	TGGT1_245660	E004	0.00200706922814744	4.15723833237205e-05	0.00187568832498221	503.319254072627	0.138809322792217
TGGT1_232320:E018	TGGT1_232320	E018	0.0256453425459404	4.22379633180274e-05	0.00190459999264511	38.7656395003105	0.719355600583012
TGGT1_203380:E024	TGGT1_203380	E024	0.0187692307235399	4.25189224696511e-05	0.00191614454299155	52.993611315668	0.588637672683674
TGGT1_232290:E004	TGGT1_232290	E004	0.039960104643912	4.2638449595821e-05	0.00192040477819115	24.86675800459	0.811357784416489
TGGT1_264830:E005	TGGT1_264830	E005	0.0203271924961102	4.29669667893457e-05	0.00193406726842001	48.9250472091942	-0.598440811875306
TGGT1_218790:E007	TGGT1_218790	E007	0.103159061621752	4.30789912237796e-05	0.00193797450155829	9.62738614195711	1.67852103455463
TGGT1_309140:E019	TGGT1_309140	E019	0.0717478813782374	4.31412837375079e-05	0.00193964120452832	13.844279264199	1.22425548373809
TGGT1_282070:E018	TGGT1_282070	E018	0.0242472983707222	4.31699632743168e-05	0.0019397955953852	41.0039653029924	-0.684122702314188
TGGT1_315210:E015	TGGT1_315210	E015	0.0229722769730063	4.34514017408839e-05	0.00195130061692829	86.9415793624658	-0.598728372429911
TGGT1_228670:E002	TGGT1_228670	E002	0.129167526887748	4.37834124199155e-05	0.00196506195099828	7.68835016004826	1.78583652257418
TGGT1_244700:E005	TGGT1_244700	E005	0.0122948512816267	4.3828780946297e-05	0.00196594981994782	80.9782445034703	-0.467394072440328
TGGT1_291840:E005	TGGT1_291840	E005	0.0114724380854476	4.436305726057e-05	0.00198875392691389	86.8007729221881	-0.285598861792531
TGGT1_222710:E005	TGGT1_222710	E005	0.0241356031003063	4.45687933224041e-05	0.00199681187901666	41.1939961754366	0.645423747237364
TGGT1_252200:E005	TGGT1_252200	E005	0.0201988779070976	4.50040792765096e-05	0.00201513895068133	49.2363786562952	-0.595764196029161
TGGT1_292220:E004	TGGT1_292220	E004	0.00541043624185068	4.52047316499903e-05	0.00202294465101357	221.351895529289	0.289603489256889
TGGT1_318650:E012	TGGT1_318650	E012	0.0123925489428468	4.52938360348884e-05	0.00202575231630542	80.3380624795246	0.462642537349848
TGGT1_244680:E004	TGGT1_244680	E004	0.0811151042905551	4.53467533657159e-05	0.00202693920207185	12.2448524930985	-1.43852128062198
TGGT1_293460:E024	TGGT1_293460	E024	0.123487927786857	4.5556826386654e-05	0.00203514527271589	8.04206051144321	1.7761063548201
TGGT1_239020:E063	TGGT1_239020	E063	0.0718651551744438	4.60016161003498e-05	0.00205382113672433	13.8216764947414	1.24137029058355
TGGT1_310320:E017	TGGT1_310320	E017	0.0222230462209618	4.60403709496785e-05	0.00205435771350781	44.7447447009772	0.627120254258198
TGGT1_244390:E001	TGGT1_244390	E001	0.01031624675465	4.62535073076699e-05	0.00206267019210646	96.5616183044584	-0.421876996396382
TGGT1_278510:E011	TGGT1_278510	E011	0.00912076127098325	4.63087172125867e-05	0.00206393439934079	109.266329387108	0.382187938656899
TGGT1_230080:E022	TGGT1_230080	E022	0.158162700147816	4.68032367012244e-05	0.00208476539038376	8.4522192747148	2.24230913452675
TGGT1_215170:E005	TGGT1_215170	E005	0.0137598727086028	4.72877556864818e-05	0.00210512704732456	72.334757901768	-0.491853544216523
TGGT1_225330:E010	TGGT1_225330	E010	0.0502689097743828	4.73178174912294e-05	0.00210524559500497	19.763748161583	-1.02824687040261
TGGT1_263100:E018	TGGT1_263100	E018	0.0354566516886613	4.75068057389438e-05	0.0021124308058815	28.028235976739	0.84389373987364
TGGT1_235340:E004	TGGT1_235340	E004	0.0190318722340759	4.76107329590224e-05	0.00211582758147623	254.957410418104	0.483641616581487
TGGT1_319540:E024	TGGT1_319540	E024	0.0475408831398589	4.77805656658886e-05	0.00212214758616756	20.8986705789223	0.947648707355235
TGGT1_211630:E006	TGGT1_211630	E006	0.00766663207602374	4.78220015184207e-05	0.00212276090737775	130.084610323697	-0.360698962286113
TGGT1_313480:E034	TGGT1_313480	E034	0.180150481061155	4.82375461233425e-05	0.00213997016829057	5.5121142986082	2.5217675449643
TGGT1_242055:E021	TGGT1_242055	E021	0.148554766178602	4.86845881136744e-05	0.00215855608591483	6.68474363057215	2.09112094074807
TGGT1_225460:E008	TGGT1_225460	E008	0.212395260829821	4.9075441726177e-05	0.0021746307473554	4.67515679557419	-1.51645511829079
TGGT1_206550:E026	TGGT1_206550	E026	0.0324656667753111	4.92369019680233e-05	0.00217927179522869	30.6131597592886	0.897753027451367
TGGT1_261030:E021	TGGT1_261030	E021	0.0123844709573435	4.92354396958421e-05	0.00217927179522869	138.735009685008	-0.379913662840004
TGGT1_257180:E002	TGGT1_257180	E002	0.0573773146062159	4.95992251599457e-05	0.00219404471134988	17.3137675681255	1.10844934443254
TGGT1_255195:E003	TGGT1_255195	E003	0.0154957569127612	5.02196661876825e-05	0.00222021202005924	64.2134930292326	-0.50403124289999
TGGT1_293440:E004	TGGT1_293440	E004	0.000678716750529467	5.04826794151036e-05	0.00223055643370806	2174.43121555485	-0.0519712310566366
TGGT1_203880:E014	TGGT1_203880	E014	0.0243505818628639	5.08108098655755e-05	0.00224344331925549	40.8297992091425	-0.660892973441354
TGGT1_268210:E014	TGGT1_268210	E014	0.0488165030335345	5.08327344745866e-05	0.00224344331925549	20.3521827007132	0.941311571181496
TGGT1_269430:E027	TGGT1_269430	E027	0.0414609014698208	5.08683899837681e-05	0.00224372817519104	23.9658838703623	0.936422210079431
TGGT1_272770:E006	TGGT1_272770	E006	0.0365415172865851	5.09694669057723e-05	0.00224689668883467	27.1953306437215	0.814811523929663
TGGT1_309940:E014	TGGT1_309940	E014	0.120214607017513	5.11506398581496e-05	0.00225359043278706	8.26110049835043	1.72634551839368
TGGT1_231360:E007	TGGT1_231360	E007	0.0312301990723737	5.13164672679825e-05	0.00225960079969626	31.8255576538647	0.743371545419376
TGGT1_205100:E002	TGGT1_205100	E002	0.0318334638327899	5.14951607670702e-05	0.00226617048560102	31.2217879112888	-0.733298988887123
TGGT1_202080:E010	TGGT1_202080	E010	0.0152746354140274	5.16934795151444e-05	0.00227359581311113	65.1451781003392	0.505787870068892
TGGT1_306520:E002	TGGT1_306520	E002	0.0226697035487404	5.20283397016431e-05	0.00228701460964253	43.8618019126686	0.617813230863227
TGGT1_263320:E003	TGGT1_263320	E003	0.0107147337400092	5.21350369854378e-05	0.0022903944178674	380.082166427116	0.321899404169309
TGGT1_291350:E009	TGGT1_291350	E009	0.0198988756257408	5.25912334927873e-05	0.00230911577593446	49.9799733416471	0.582525044337094
TGGT1_248850:E002	TGGT1_248850	E002	0.0719866783526293	5.2729317545332e-05	0.00231385640904093	13.7983324533801	1.23808248666906
TGGT1_203030:E018	TGGT1_203030	E018	0.0254144560990531	5.27762578437423e-05	0.00231459436297924	39.1182984793847	-0.67862226868769
TGGT1_258090:E005	TGGT1_258090	E005	0.0158482528133141	5.28089642165244e-05	0.00231470757758419	62.7821422048599	0.524230313368689
TGGT1_200330:E015	TGGT1_200330	E015	0.019964794487019	5.30513829526056e-05	0.00232400747544433	49.8146658504752	-0.600821654698822
TGGT1_244500:E021	TGGT1_244500	E021	0.05816212434499	5.31298271618606e-05	0.00232611768070421	17.0800057503429	-1.08962735201785
TGGT1_222400:E004	TGGT1_222400	E004	0.0754121165024453	5.32240263906079e-05	0.00232891487230931	13.1712849033579	1.25221255497628
TGGT1_244700:E004	TGGT1_244700	E004	0.0116952739391151	5.33125987509904e-05	0.00233146280605	85.1420181020511	-0.450567453360473
TGGT1_226910:E010	TGGT1_226910	E010	0.0361300157560183	5.33859106146106e-05	0.00233334084976953	27.5053671550908	0.827196788630053
TGGT1_310100:E024	TGGT1_310100	E024	0.186102923878856	5.34191726296682e-05	0.00233346729240808	5.33577836366598	13.5959649496528
TGGT1_278060:E003	TGGT1_278060	E003	0.0655485852121502	5.35669377839945e-05	0.00233859249915272	15.1543001427118	1.17198156256147
TGGT1_260990:E002	TGGT1_260990	E002	0.107615491800498	5.37290967862958e-05	0.00234360411924995	9.2285816394197	1.4706737819364
TGGT1_300290:E004	TGGT1_300290	E004	0.00980731247257218	5.37427340749692e-05	0.00234360411924995	101.590226112427	-0.37758724409808
TGGT1_261430:E004	TGGT1_261430	E004	0.00591113500510413	5.38203282598756e-05	0.0023456565867862	168.944281612733	0.300492173409935
TGGT1_268580:E015	TGGT1_268580	E015	0.0475311058631318	5.39379262812932e-05	0.0023494492299749	20.9029726166612	0.934247936780561
TGGT1_232450:E009	TGGT1_232450	E009	0.0251402847603261	5.40006354981002e-05	0.00235084806219123	39.5454959094964	0.656053374323565
TGGT1_222930:E002	TGGT1_222930	E002	0.00327042914604984	5.41057487298846e-05	0.00235409026905897	306.813657740333	-0.225996584202358
TGGT1_269430:E025	TGGT1_269430	E025	0.040966159037973	5.42074368833573e-05	0.00235717986859452	24.2555605422615	0.936993777981776
TGGT1_215690:E004	TGGT1_215690	E004	0.0588773062159656	5.45047251037344e-05	0.00236876672103826	16.8724134150851	1.0647984261228
TGGT1_203880:E002	TGGT1_203880	E002	0.0089203297081616	5.59267959810805e-05	0.00242919571667512	111.730981791461	0.386505347550714
TGGT1_289050:E002	TGGT1_289050	E002	0.00168595102664953	5.60367197703717e-05	0.00243259516214466	601.189169178698	0.163936541839887
TGGT1_312065:E017	TGGT1_312065	E017	0.0562976107050654	5.64055397168419e-05	0.00244722329487464	17.6460234689104	1.04974817341308
TGGT1_236160:E002	TGGT1_236160	E002	0.0166375976183098	5.67056881999288e-05	0.00245885720328326	59.7973479169271	-0.523416679556176
TGGT1_209040:E004	TGGT1_209040	E004	0.00785643497954095	5.75632345646762e-05	0.00249463409714948	126.928036642978	0.107164883331463
TGGT1_267590:E010	TGGT1_267590	E010	0.164128635106861	5.7922506496111e-05	0.00250878896935833	6.05030696042837	2.45348365360754
TGGT1_223540:E009	TGGT1_223540	E009	0.0682394987595529	5.79891979376269e-05	0.00251026253630053	14.5564124959515	1.16276567039431
TGGT1_229740:E010	TGGT1_229740	E010	0.0244635124083235	5.80435177163295e-05	0.00251119919525316	40.6410508453701	0.651230213479323
TGGT1_224110:E014	TGGT1_224110	E014	0.0166566707660953	5.8083338985351e-05	0.00251150788836096	59.7287332124255	0.523783196046973
TGGT1_213072:E007	TGGT1_213072	E007	0.00981822581365515	5.82696278110988e-05	0.00251814588983206	101.47690613739	-0.410009216501516
TGGT1_236070:E003	TGGT1_236070	E003	0.00457325367241246	5.83641230260229e-05	0.0025208117599497	218.743992547542	-0.240758820613444
TGGT1_311470:E010	TGGT1_311470	E010	0.0481547867818604	5.84968559426371e-05	0.00252512523599124	20.6320517083286	-0.982168290113961
TGGT1_251390:E013	TGGT1_251390	E013	0.0110902754121504	5.86395248116626e-05	0.00252986253113628	89.8012037113411	0.402972878057567
TGGT1_304680:E002	TGGT1_304680	E002	0.034021518149511	5.89110192785432e-05	0.00254014926391999	33.0739235353556	0.759951621434294
TGGT1_271470:E006	TGGT1_271470	E006	0.0497317606040018	5.91081502753487e-05	0.00254721982204541	19.9773632790736	0.979683359161738
TGGT1_215700:E011	TGGT1_215700	E011	0.0443648584734079	5.92233630148185e-05	0.00255075422868251	69.1280473161229	0.778513393069937
TGGT1_260360:E010	TGGT1_260360	E010	0.0321026634309426	5.94320232348964e-05	0.00255830720969173	30.9596931019117	0.741583382800201
TGGT1_271145:E028	TGGT1_271145	E028	0.102819395486994	5.98621497141076e-05	0.00257537961790755	9.65920110662417	1.86415568296248
TGGT1_209108:E005	TGGT1_209108	E005	0.0199096197909708	6.02764470341838e-05	0.00259175230037246	49.9529549508421	-0.564254959205864
TGGT1_266750:E004	TGGT1_266750	E004	0.0147056113174047	6.06190971738077e-05	0.00260502772345854	67.6718604509713	0.488955263592389
TGGT1_217610:E001	TGGT1_217610	E001	0.00960056801595148	6.07714311891865e-05	0.0026086561219461	103.785827258056	-0.386832507281508
TGGT1_263740:E003	TGGT1_263740	E003	0.0108537793133951	6.07411673072157e-05	0.0026086561219461	91.7641516882554	0.4222254858177
TGGT1_263170:E009	TGGT1_263170	E009	0.0257364488768143	6.08436604820131e-05	0.00261029834754687	38.6282258526971	0.645030413477003
TGGT1_243960:E029	TGGT1_243960	E029	0.084098306945827	6.09924353891245e-05	0.00261495170194357	11.8103148669123	1.35505297359172
TGGT1_249810:E018	TGGT1_249810	E018	0.0149074464195716	6.10201908141237e-05	0.00261495170194357	66.7535098440894	0.503168722299433
TGGT1_212310:E015	TGGT1_212310	E015	0.0186189360049719	6.11198546715763e-05	0.00261776269420285	53.4221780151227	-0.57559703897349
TGGT1_224210:E014	TGGT1_224210	E014	0.0508399359983128	6.12253371674965e-05	0.00262081962782113	44.1366864692279	0.841090839238126
TGGT1_213060:E023	TGGT1_213060	E023	0.0198665580295564	6.16090134796691e-05	0.00263577492691389	50.0614189782543	-0.576143119770347
TGGT1_295040:E006	TGGT1_295040	E006	0.0274858483771922	6.16837477875162e-05	0.00263750368878652	36.1665522621062	0.707480564659329
TGGT1_250330:E009	TGGT1_250330	E009	0.0099137750531562	6.17328713229267e-05	0.00263813605886525	100.495450999737	0.389367753177599
TGGT1_270690:E009	TGGT1_270690	E009	0.0717045884894686	6.19877498865644e-05	0.0026475557187515	13.8526420144036	1.18272459313971
TGGT1_410800:E022	TGGT1_410800	E022	0.0130493930703868	6.21436350808198e-05	0.00265273916039164	82.5528020132348	0.459748912599981
TGGT1_290960:E025	TGGT1_290960	E025	0.0507581010871814	6.25709949982486e-05	0.00266949891320401	19.5731414544044	-0.973308503616644
TGGT1_214300:E016	TGGT1_214300	E016	0.0229401934927098	6.32677483608744e-05	0.00269772695938097	43.3438438321941	0.633684193343697
TGGT1_206550:E033	TGGT1_206550	E033	0.0254217236983197	6.33923330570136e-05	0.00270154004165377	39.1071000752144	0.752973906491816
TGGT1_321440:E014	TGGT1_321440	E014	0.016534581993009	6.34454022260999e-05	0.00270230286632308	60.1706836577766	0.534492692398236
TGGT1_297500:E021	TGGT1_297500	E021	0.0419692282071488	6.36355725360665e-05	0.0027089011008054	23.6753727070779	0.861824205426226
TGGT1_278630:E008	TGGT1_278630	E008	0.0332625082210016	6.37164295996596e-05	0.00271057884523597	29.8790244988717	0.968721756214342
TGGT1_290330:E041	TGGT1_290330	E041	0.00340156295010641	6.37455389114802e-05	0.00271057884523597	294.864390539716	0.197400725185749
TGGT1_260650:E014	TGGT1_260650	E014	0.0498215233962097	6.38638052807685e-05	0.00271410575572921	20.8536078246696	0.958575229432302
TGGT1_261022:E070	TGGT1_261022	E070	0.00261396870336377	6.39185007911971e-05	0.0027149286043633	384.896769433553	-0.19976507968173
TGGT1_253700:E006	TGGT1_253700	E006	0.0112693711034921	6.40258086760814e-05	0.00271798401173705	88.3696747163935	-0.433177546128534
TGGT1_216790:E020	TGGT1_216790	E020	0.0434364003015274	6.41937899157429e-05	0.0027236102903125	22.8750421793999	0.887355543387222
TGGT1_222710:E007	TGGT1_222710	E007	0.0138437371467172	6.43163033127579e-05	0.00272674513553293	71.8954632088548	0.453703631342696
TGGT1_228780:E002	TGGT1_228780	E002	0.0105527350609838	6.43386510499003e-05	0.00272674513553293	94.3905557036123	0.397402058289245
TGGT1_249390:E041	TGGT1_249390	E041	0.0174404360676292	6.44281638504408e-05	0.00272903353129896	57.0392269246693	-0.543854963132947
TGGT1_210730:E002	TGGT1_210730	E002	0.0693732539041003	6.49062862791062e-05	0.0027477709745607	14.3184011032415	1.15602127099267
TGGT1_260205:E001	TGGT1_260205	E001	0.0600904866143974	6.52288699158977e-05	0.00275990676086334	16.5315766270316	0.965949863927942
TGGT1_236540:E016	TGGT1_236540	E016	0.0281824899610658	6.54166737572933e-05	0.00276632964308704	35.2714565121523	-0.706414100582514
TGGT1_310450:E021	TGGT1_310450	E021	0.0243091122010364	6.55027621617953e-05	0.00276844649957419	40.8995510824501	-0.635193381550022
TGGT1_221700:E010	TGGT1_221700	E010	0.0296314122936864	6.59312337876481e-05	0.00278502375510803	33.5447343849338	-0.699397339761434
TGGT1_213740:E011	TGGT1_213740	E011	0.0807784171439142	6.60643660827331e-05	0.00278911411906536	12.2959112705752	1.32084479453551
TGGT1_265020:E014	TGGT1_265020	E014	0.0347312755860439	6.63696788444965e-05	0.00279892810832853	28.6141989831181	0.792422903690285
TGGT1_312840:E018	TGGT1_312840	E018	0.00214237990113891	6.63478760366159e-05	0.00279892810832853	471.009415804315	-0.14019299933249
TGGT1_297500:E005	TGGT1_297500	E005	0.0446026800808139	6.69595486837399e-05	0.00282225498750001	22.2764376646193	0.89464574689119
TGGT1_218310:E031	TGGT1_218310	E031	0.0214507415260303	6.72742239984665e-05	0.00283396356873365	46.3583152194938	-0.616759521158265
TGGT1_253530:E002	TGGT1_253530	E002	0.0862479203923704	6.78515289821781e-05	0.00285671667528966	11.9864191377161	1.22670498844818
TGGT1_258990:E007	TGGT1_258990	E007	0.261130783793415	6.80101625883558e-05	0.00286089200928597	3.802504648092	13.9262205001811
TGGT1_282055:E006	TGGT1_282055	E006	0.0125081262765574	6.80251662736113e-05	0.00286089200928597	219.757108438621	-0.405328162141784
TGGT1_310560:E014	TGGT1_310560	E014	0.0779353846905299	6.84482344396639e-05	0.00287710995056918	44.8846411967869	1.02054481555546
TGGT1_263100:E011	TGGT1_263100	E011	0.00853615917942401	6.86814102744126e-05	0.00288533270708313	116.77986379901	-0.372133192899842
TGGT1_288000:E014	TGGT1_288000	E014	0.0163916989782559	6.87264812780724e-05	0.00288564843823129	60.6962859672662	-0.531181450669071
TGGT1_286220:E019	TGGT1_286220	E019	0.0514374240149264	7.00921553753316e-05	0.00294138227338851	19.3144695918383	0.929206315809386
TGGT1_210380:E019	TGGT1_210380	E019	0.0466964142642492	7.07042473914585e-05	0.00296544883014056	63.4090509701992	-0.801820779015569
TGGT1_310560:E005	TGGT1_310560	E005	0.0175532960738161	7.10761622287843e-05	0.00297942120958707	56.6717669416623	0.562483837499764
TGGT1_202740:E005	TGGT1_202740	E005	0.0801387176526172	7.15275859082115e-05	0.0029936035189672	12.3941044846327	1.28903131505045
TGGT1_268280:E030	TGGT1_268280	E030	0.00964334478440929	7.1529805437153e-05	0.0029936035189672	107.299463237516	0.389432076772216
TGGT1_295910:E003	TGGT1_295910	E003	0.00270308880482794	7.15313723964208e-05	0.0029936035189672	372.042651912336	-0.191216024084616
TGGT1_200350:E012	TGGT1_200350	E012	0.00162285960727708	7.19093876755704e-05	0.00300778531346097	769.283007877282	0.134807271744779
TGGT1_310970:E022	TGGT1_310970	E022	0.0399917540979318	7.29023666208001e-05	0.00304766003484353	24.847061461009	0.870863045514357
TGGT1_266920:E009	TGGT1_266920	E009	0.00077244659305562	7.31080522553149e-05	0.00305459674341579	1345.42623576783	0.0992980391187088
TGGT1_246090:E002	TGGT1_246090	E002	0.120892685400478	7.32245793837048e-05	0.00305780272070964	14.2756219017062	1.52460471015215
TGGT1_316730:E011	TGGT1_316730	E011	0.160174317877718	7.36609036991747e-05	0.0030743524484158	6.19970663524428	2.14883211786199
TGGT1_210820:E007	TGGT1_210820	E007	0.0398517506373116	7.38375636424194e-05	0.00308005259369847	24.9344275316407	0.82891231970756
TGGT1_313980:E009	TGGT1_313980	E009	0.240262420858043	7.57140101302062e-05	0.00315661280324181	4.13282451628348	13.6742029993285
TGGT1_249810:E033	TGGT1_249810	E033	0.00310441670772965	7.57956885200517e-05	0.00315830440282821	323.405407560543	-0.217062870487573
TGGT1_304955:E027	TGGT1_304955	E027	0.00114249993616368	7.5842998774284e-05	0.00315856287090497	896.066564361696	-0.0872503865098045
TGGT1_217724:E018	TGGT1_217724	E018	0.0212364807592278	7.60803130317367e-05	0.00316672969253497	46.8267987899101	-0.395432680075572
TGGT1_204040:E004	TGGT1_204040	E004	0.0678910355715031	7.62270497549313e-05	0.00316940358334397	14.6311639652661	1.10924681906301
TGGT1_228360:E004	TGGT1_228360	E004	0.0303710842466852	7.62147083785446e-05	0.00316940358334397	32.726840088244	-0.721609627732498
TGGT1_224350A:E014	TGGT1_224350A	E014	0.00427507708959584	7.68929884010884e-05	0.00319433900810601	234.125086138932	-0.243856267455017
TGGT1_280400:E012	TGGT1_280400	E012	0.055162523678167	7.69099153402152e-05	0.00319433900810601	18.0093555799192	0.994859496242938
TGGT1_366970:E001	TGGT1_366970	E001	0.0164166643637956	7.73480839204812e-05	0.00321080212004215	2342.05630597462	0.271836738599704
TGGT1_290650:E014	TGGT1_290650	E014	0.0121840970919238	7.74916300922872e-05	0.00321502396403946	81.7164334223067	0.43702257100902
TGGT1_214440:E011	TGGT1_214440	E011	0.0106933474485327	7.80694570716813e-05	0.00323724925688979	93.1453449080388	-0.419951394001672
TGGT1_286090:E009	TGGT1_286090	E009	0.00126206083059901	7.90753449938625e-05	0.00327719109131252	808.790515968251	-0.13591199799944
TGGT1_257040:E007	TGGT1_257040	E007	0.00157684286535625	7.9238719140963e-05	0.00328219162406155	926.353188640375	0.0784703308189592
TGGT1_225105:E001	TGGT1_225105	E001	0.0248942577768226	7.9430138050289e-05	0.00328834780030714	54.5353098277556	0.677567367610962
TGGT1_206550:E034	TGGT1_206550	E034	0.0293545655691955	7.98903018128035e-05	0.00330561718922476	33.8614716574876	0.821958272211369
TGGT1_293440:E006	TGGT1_293440	E006	0.02526888495189	8.03212522026165e-05	0.00332165987916708	96.7059609067403	0.559227196543045
TGGT1_221170:E012	TGGT1_221170	E012	0.0214507780817731	8.0646328112232e-05	0.00333330925936502	46.3582360897505	-0.593668343628079
TGGT1_300250:E005	TGGT1_300250	E005	0.0546349149760156	8.08223224566849e-05	0.003336993439336	18.1833816746382	0.999032889640298
TGGT1_309600:E021	TGGT1_309600	E021	0.000745216169750843	8.0811805423797e-05	0.003336993439336	1396.9767571166	-0.076708953455767
TGGT1_246950:E005	TGGT1_246950	E005	0.0171599766541079	8.11272065216009e-05	0.0033464813260673	57.973344633802	0.507838153389331
TGGT1_289350:E037	TGGT1_289350	E037	0.0036379561242364	8.11392260299516e-05	0.0033464813260673	425.097529052108	0.22665697946412
TGGT1_233680:E007	TGGT1_233680	E007	0.0572168614630017	8.12318512804251e-05	0.00334850416139164	17.3623498502582	1.00203005426634
TGGT1_227780:E002	TGGT1_227780	E002	0.151703793988425	8.14613079517764e-05	0.00335616220862769	6.54595187885036	2.10285537997958
TGGT1_260270:E002	TGGT1_260270	E002	0.0212970137218025	8.16165987137948e-05	0.00336075808969553	46.6934858541804	0.605710566087333
TGGT1_249370:E005	TGGT1_249370	E005	0.00698647742142176	8.19319447558747e-05	0.00337193617525824	337.892182436574	-0.310162863739648
TGGT1_226710:E014	TGGT1_226710	E014	0.00131011965458887	8.20272914076435e-05	0.00337405299244599	778.31884083575	-0.139320853258316
TGGT1_225560:E011	TGGT1_225560	E011	0.0112582951326085	8.21012118968946e-05	0.00337528668727752	237.521418565025	-0.391139265150568
TGGT1_214200:E010	TGGT1_214200	E010	0.0717939856154935	8.24853811779124e-05	0.00338926696982206	13.8353845494681	1.32423405605573
TGGT1_209830:E001	TGGT1_209830	E001	0.0109593494311888	8.26244374172817e-05	0.00339316616666578	90.8774050019805	-0.370182840407088
TGGT1_256780:E008	TGGT1_256780	E008	0.0223281413039805	8.33362502973808e-05	0.00341874397442597	44.5338120066086	0.598194459947512
TGGT1_265520:E001	TGGT1_265520	E001	0.00124176447958031	8.33358858541205e-05	0.00341874397442597	822.388057910873	-0.122971441894448
TGGT1_220160:E007	TGGT1_220160	E007	0.0327683808824182	8.37092367776395e-05	0.00343221271413206	30.3300572975767	0.723273779338718
TGGT1_260610:E014	TGGT1_260610	E014	0.0275341436788558	8.42417076323905e-05	0.00345220271431999	36.1030359442809	0.664922922271992
TGGT1_286610:E003	TGGT1_286610	E003	0.0490876987876049	8.47728484915971e-05	0.00347088742206452	20.2396634679617	0.912907123723083
TGGT1_314430:E019	TGGT1_314430	E019	0.0255626155188966	8.47880017597655e-05	0.00347088742206452	121.213556492177	0.558716393284835
TGGT1_246050:E018	TGGT1_246050	E018	0.0406950912247965	8.522045083932e-05	0.00348673257781727	24.4172627093412	0.858259850306772
TGGT1_278060:E012	TGGT1_278060	E012	0.0802545908369095	8.543564249659e-05	0.00349367666977674	30.5169863879541	1.04694005232877
TGGT1_220500:E016	TGGT1_220500	E016	0.00561885395974774	8.55690155207925e-05	0.00349726938594209	177.786741861828	-0.277940063705546
TGGT1_214850:E014	TGGT1_214850	E014	0.0412840090286888	8.60739878849891e-05	0.00351416950431398	24.0686580928887	0.89220151538222
TGGT1_227780:E039	TGGT1_227780	E039	0.0462450879072737	8.60417430912029e-05	0.00351416950431398	21.4846923823524	0.906883262320378
TGGT1_269430:E024	TGGT1_269430	E024	0.0591611372906764	8.64550706411231e-05	0.00352785356497715	16.7914191722763	1.16026071531757
TGGT1_258832:E008	TGGT1_258832	E008	0.106359676112473	8.71173521197123e-05	0.00355299149937491	9.33758122630582	1.39847207677015
TGGT1_226600:E021	TGGT1_226600	E021	0.0686204763421215	8.73395856430756e-05	0.0035588759144953	14.4755553131773	-1.17872120228445
TGGT1_313930:E007	TGGT1_313930	E007	0.0131532022376589	8.73542690987172e-05	0.0035588759144953	202.731163184998	0.413534927909899
TGGT1_236580:E005	TGGT1_236580	E005	0.00586277782477918	8.75694113435685e-05	0.00356575032294954	170.346017028156	-0.297911709599057
TGGT1_224340:E002	TGGT1_224340	E002	0.0260400419497196	8.76303041370863e-05	0.00356633987234179	51.6374874229228	0.614382311831259
TGGT1_216680:E033	TGGT1_216680	E033	0.0122079367130436	8.8299447024554e-05	0.00359086650791247	81.5564052577721	0.439938149812837
TGGT1_269430:E018	TGGT1_269430	E018	0.0547823045702075	8.83264273716383e-05	0.00359086650791247	18.1344291647321	1.07090245867855
TGGT1_258000:E003	TGGT1_258000	E003	0.146755444941125	8.85334241061379e-05	0.00359547711841613	7.75321608802734	1.88461338587782
TGGT1_276170:E016	TGGT1_276170	E016	0.0433818473057122	8.85312879647997e-05	0.00359547711841613	53.6459488360436	0.749891001860095
TGGT1_242070:E012	TGGT1_242070	E012	0.000426724567572142	8.89805375238597e-05	0.00361172612874845	2531.41146551507	-0.0758606659788752
TGGT1_290670:E007	TGGT1_290670	E007	0.0398775509904264	9.08518239490064e-05	0.00368573473958279	24.9182812422709	0.819920575428858
TGGT1_214170:E009	TGGT1_214170	E009	0.163413875112025	9.16881572141793e-05	0.00371573994507695	6.07677614001368	2.46129086921647
TGGT1_219650:E029	TGGT1_219650	E029	0.030174081775573	9.16432028086943e-05	0.00371573994507695	32.9407539261558	-0.768743686883326
TGGT1_310810:E015	TGGT1_310810	E015	0.0293739337279853	9.18731818651601e-05	0.00372127552713406	33.8391182980558	-0.707478338293999
TGGT1_293180:E010	TGGT1_293180	E010	0.0087469481745327	9.20340505062044e-05	0.00372582736498695	181.172949710653	0.349183868781959
TGGT1_286220:E017	TGGT1_286220	E017	0.100885843003829	9.23511511563493e-05	0.00373669584065319	9.8443902797831	1.38945117526891
TGGT1_272600:E006	TGGT1_272600	E006	0.0689613580166952	9.25654155769648e-05	0.00374339412457223	14.4039656102414	1.10201290922404
TGGT1_212260:E012	TGGT1_212260	E012	0.00300807555262013	9.27026627097074e-05	0.00374697238012929	333.883536241017	-0.193215691482476
TGGT1_219850:E007	TGGT1_219850	E007	0.00972418801237417	9.27611922449756e-05	0.0037473668393939	102.461735499626	0.39403690993044
TGGT1_305520:E008	TGGT1_305520	E008	0.0387030974016119	9.30102634445103e-05	0.00375545434171615	100.188740144879	-0.678060839471713
TGGT1_230010:E009	TGGT1_230010	E009	0.152460658967907	9.35498150015017e-05	0.00377525584835629	6.51344825503361	2.03947844914977
TGGT1_270370:E008	TGGT1_270370	E008	0.0309495356274501	9.3827752498317e-05	0.00378448452425889	32.1144875401219	0.692030211177715
TGGT1_292080:E006	TGGT1_292080	E006	0.273544012709816	9.46683022715856e-05	0.00381495438315997	37.5996738948689	1.81226633953523
TGGT1_313010:E004	TGGT1_313010	E004	0.0337807577367719	9.46824838123047e-05	0.00381495438315997	29.4201646945467	0.768729600600709
TGGT1_244500:E017	TGGT1_244500	E017	0.0125383545695719	9.47753753092729e-05	0.00381669576134099	79.4012501997991	0.439301480408461
TGGT1_206610:E004	TGGT1_206610	E004	0.118389963356044	9.50749653675712e-05	0.00382675490515876	8.38845894344757	1.79725752891142
TGGT1_263980:E012	TGGT1_263980	E012	0.0512688585131216	9.5170217141541e-05	0.00382858323272492	19.3780159093959	0.96363233059879
TGGT1_219290:E013	TGGT1_219290	E013	0.0321760866885065	9.55574583792906e-05	0.00384214988460992	31.290433726912	0.721426761393094
TGGT1_318410:E007	TGGT1_318410	E007	0.0377925363808909	9.61352042519462e-05	0.00386335810099728	40.6404672951929	0.760464323285068
TGGT1_219310:E011	TGGT1_219310	E011	0.0270095957863935	9.69054030678681e-05	0.0038909836338854	36.8050830757712	0.666661678386352
TGGT1_321540:E011	TGGT1_321540	E011	0.0281084801156262	9.69239126365768e-05	0.0038909836338854	35.3644407385627	0.689877471001794
TGGT1_246080:E004	TGGT1_246080	E004	0.042384750274491	9.76796545456364e-05	0.00391904208245693	23.4430802072578	0.84769631013335
TGGT1_289300:E003	TGGT1_289300	E003	0.0156099464122472	9.7724854301801e-05	0.00391904208245693	63.7427188394799	-0.48631998361116
TGGT1_226072:E007	TGGT1_226072	E007	0.0215284816298905	9.79072398556627e-05	0.00392430807970243	97.0229784467973	0.519384615343858
TGGT1_202740:E013	TGGT1_202740	E013	0.0590750017809756	9.81540152389706e-05	0.00393214810683878	16.8159165597584	1.03350028507387
TGGT1_258990:E008	TGGT1_258990	E008	0.10812572040612	9.84033888647929e-05	0.00393803186989796	9.18501947598526	1.47124631583816
TGGT1_304700:E034	TGGT1_304700	E034	0.0540206444078713	9.83529318449188e-05	0.00393803186989796	18.3902777474028	1.04395251175344
TGGT1_272180:E012	TGGT1_272180	E012	0.0337618999808963	9.85599078188838e-05	0.00394224239306589	29.4366141892308	-0.751572032307082
TGGT1_207390:E008	TGGT1_207390	E008	0.0209842670058562	9.88878914130922e-05	0.00395330328434327	47.3905461810639	0.583134698858029
TGGT1_280490:E010	TGGT1_280490	E010	0.0804741104492978	9.92175817025011e-05	0.00396442086597768	12.3424272747545	1.3017412488457
TGGT1_214770:E002	TGGT1_214770	E002	0.00883810866409124	9.94429554733158e-05	0.00397136089901412	112.774492912622	0.356318666765698
TGGT1_262990:E007	TGGT1_262990	E007	0.0572879926423253	0.000100221343032809	0.00400036744655167	17.340779027375	1.1313360455362
TGGT1_308860:E006	TGGT1_308860	E006	0.00731050099842594	0.000100290205904575	0.00400103766930936	203.692498717034	0.320895090994599
TGGT1_244040:E027	TGGT1_244040	E027	0.0302317987662785	0.000100537550150447	0.00400882394442653	32.8777932373323	0.727399440197285
TGGT1_232690:E016	TGGT1_232690	E016	0.0311260047909654	0.000100679235329449	0.004012391288905	31.9322119874467	-0.729607926931037
TGGT1_248750:E012	TGGT1_248750	E012	0.169042530683557	0.00010100087399397	0.00402312294197752	5.87439472240819	2.08925274977927
TGGT1_290290:E016	TGGT1_290290	E016	0.0216875880282293	0.000101316626946356	0.00403360915268246	45.8512366347512	0.595415436432298
TGGT1_226068:E012	TGGT1_226068	E012	0.0215264343915321	0.000102228222968112	0.00406779387270886	46.1950447732169	-0.602188318959668
TGGT1_321360:E011	TGGT1_321360	E011	0.0452797472989942	0.000102803412130585	0.00408856406722452	21.9430843347297	0.900309461714798
TGGT1_310100:E026	TGGT1_310100	E026	0.140968393208385	0.000102899431250068	0.00409026570044567	7.0445787706825	2.32727762747723
TGGT1_271145:E055	TGGT1_271145	E055	0.111487086582811	0.000103448592710794	0.00410996872705237	8.90800284018291	1.81379831176218
TGGT1_278060:E016	TGGT1_278060	E016	0.0369125919292475	0.00010365758709899	0.00411614367954787	26.9216856751786	0.799098260447753
TGGT1_254470:E007	TGGT1_254470	E007	0.00927943846120188	0.00010503607458671	0.00416872771850155	107.390911810315	-0.3817278993046
TGGT1_258000:E004	TGGT1_258000	E004	0.100627195118585	0.00010509065869472	0.00416874080646679	9.86970256855924	1.42486079886565
TGGT1_268600:E007	TGGT1_268600	E007	0.0527755473521934	0.000106893081431367	0.00423630706670932	18.8244308873975	0.94689281021605
TGGT1_270100:E012	TGGT1_270100	E012	0.0496505512409723	0.00010690421805054	0.00423630706670932	20.0100613618016	0.920443575316386
TGGT1_295620:E006	TGGT1_295620	E006	0.0259789248050027	0.000106983344836558	0.0042372573542302	38.2672071045675	0.642783222245753
TGGT1_285830:E053	TGGT1_285830	E053	0.00391235647622524	0.000107083784000654	0.00423905034067915	256.024434909591	0.227385807474237
TGGT1_209250:E014	TGGT1_209250	E014	0.000768895318314385	0.000107782451820419	0.00426162590174104	1351.93245593535	-0.068635169370987
TGGT1_233090:E028	TGGT1_233090	E028	0.00313863680651983	0.00010781187651901	0.00426162590174104	319.840148344756	-0.17131756701156
TGGT1_263330:E009	TGGT1_263330	E009	0.0490170207091355	0.000107820460884529	0.00426162590174104	20.2688677885576	0.874257607668226
TGGT1_276130:E010	TGGT1_276130	E010	0.033271551754505	0.000108131100142001	0.00427170660237065	29.870894651486	0.734250155601272
TGGT1_270840:E029	TGGT1_270840	E029	0.142611387618513	0.000108753986085756	0.0042941058730068	8.8159160052555	1.90480472949758
TGGT1_263505:E010	TGGT1_263505	E010	0.0693582984373469	0.000108811576069409	0.00429417312298161	14.3214900633414	1.04847127094158
TGGT1_262620:E004	TGGT1_262620	E004	0.00461632517712304	0.000108920960599519	0.00429628329034149	216.68767592094	-0.264520610783
TGGT1_315570:E003	TGGT1_315570	E003	0.0249860812997165	0.000109072822167974	0.00430006589888181	39.7898915746854	-0.418734948685915
TGGT1_221590:E008	TGGT1_221590	E008	0.0106096722118556	0.000109292571248789	0.00430651963950935	175.424870834016	-0.369371244048668
TGGT1_222930:E009	TGGT1_222930	E009	0.0187114120914604	0.000109761569769918	0.00432278305300418	53.1576653156053	0.513653219144018
TGGT1_261955B:E018	TGGT1_261955B	E018	0.0265352550656145	0.000109904761350074	0.0043262049937785	37.4638630136835	-0.669590500761484
TGGT1_219310:E017	TGGT1_219310	E017	0.0193044620324529	0.000110071489012446	0.00433054941180199	51.5216895771799	0.555282659850021
TGGT1_243710:E006	TGGT1_243710	E006	0.0140602641332369	0.0001104951400148	0.00434499236096068	70.785553257312	0.474632732126871
TGGT1_229630:E008	TGGT1_229630	E008	0.0509096791514719	0.000110922692393987	0.00435957386980909	19.5148249949408	0.965291347401004
TGGT1_249180:E004	TGGT1_249180	E004	0.00114482361897689	0.000111402209254155	0.00437618177528705	894.191236852519	0.120933100066001
TGGT1_234390:E002	TGGT1_234390	E002	0.0349214946329817	0.000111484496721801	0.00437717643056363	28.4581818328978	-0.74419414263991
TGGT1_217680:E016	TGGT1_217680	E016	0.00946953835002751	0.000111657016737065	0.00438171102912454	105.227162956566	-0.38713094628356
TGGT1_289200:E017	TGGT1_289200	E017	0.101693170247593	0.000112922459254132	0.00442910821935158	9.76621055967249	1.5217210280349
TGGT1_264440:E008	TGGT1_264440	E008	0.0436543986136661	0.000113242077435334	0.00443937831831568	28.6819077665567	0.846120968305209
TGGT1_301460:E021	TGGT1_301460	E021	0.00888908990593684	0.000113684843307175	0.00445446318469833	112.125179994852	-0.288724591570477
TGGT1_307610:E001	TGGT1_307610	E001	0.0117156054761905	0.000113965695113888	0.00446319170003353	84.9938239322029	-0.396019389356665
TGGT1_233680:E002	TGGT1_233680	E002	0.0627960393377049	0.000114890035136983	0.00449709914916981	15.8189256930664	1.04168980450254
TGGT1_235340:E009	TGGT1_235340	E009	0.0137054561003297	0.000114982986503365	0.0044984458930545	72.6226835751076	0.472599771109965
TGGT1_255350:E004	TGGT1_255350	E004	0.043599792403676	0.0001162987564121	0.00454760689386083	22.7892490370973	0.857988951004639
TGGT1_221460:E018	TGGT1_221460	E018	0.0260738293048802	0.000116464803907716	0.00455178338649908	38.1277360173155	-0.646424358447389
TGGT1_244040:E040	TGGT1_244040	E040	0.0191498145226077	0.000116536984190338	0.00455228889386528	51.9385130199876	-0.53889357118467
TGGT1_274290:E007	TGGT1_274290	E007	0.0320490373904725	0.000117620871715549	0.00459229416667056	31.0115522621955	-0.678018434144534
TGGT1_219650:E028	TGGT1_219650	E028	0.0234153461063044	0.000117682411984507	0.00459236337717295	57.7941718221308	-0.61552676155424
TGGT1_209120:E005	TGGT1_209120	E005	0.0301502615006098	0.000117850091574445	0.00459657232807391	32.9668086700953	0.653018185946141
TGGT1_306310:E004	TGGT1_306310	E004	0.159258107887493	0.000117926349869502	0.0045972130618584	6.2353812070316	2.38971302178578
TGGT1_201680:E010	TGGT1_201680	E010	0.087703506089319	0.000118974957828466	0.00463573977417131	39.7904171846643	1.10926493997448
TGGT1_219770:E007	TGGT1_219770	E007	0.0162856394533457	0.000120221679092928	0.00468194280611419	61.0924076655792	0.486280522823455
TGGT1_227780:E023	TGGT1_227780	E023	0.165420078406454	0.000120401220584543	0.00468655956740353	6.00306203364898	2.04944566980538
TGGT1_249270:E014	TGGT1_249270	E014	0.0125575928809754	0.00012052112864697	0.00468885162625176	79.2792716294443	0.446422855914081
TGGT1_201780:E004	TGGT1_201780	E004	9.25310394507638e-05	0.000120646803925139	0.00469136562408701	17115.6529060135	-0.0106878188105064
TGGT1_260340:E014	TGGT1_260340	E014	0.00787187631132883	0.000121897451553064	0.00473759963833222	126.677960089699	-0.274758041614295
TGGT1_289190:E024	TGGT1_289190	E024	0.0997509348750997	0.000121985460115401	0.00473862325525128	9.95643280627645	1.48213229873369
TGGT1_271100:E007	TGGT1_271100	E007	0.0538406775890065	0.000122575163787349	0.00475912473973143	18.4517881805863	0.965057852008588
TGGT1_236620:E010	TGGT1_236620	E010	0.021071285363587	0.000123249038080387	0.00478287188837511	47.1945156453735	0.561809372100015
TGGT1_238050:E001	TGGT1_238050	E001	0.0285310569343133	0.000123440787294375	0.00478789488810594	34.8400192884051	0.693858946435949
TGGT1_222120:E004	TGGT1_222120	E004	0.0381312829480657	0.000124114729460277	0.00480917976174446	26.0604781109884	-0.781128291492468
TGGT1_230890:E002	TGGT1_230890	E002	0.0349968987343625	0.000124067668700577	0.00480917976174446	28.3968054625788	-0.748967412894305
TGGT1_297780:E009	TGGT1_297780	E009	0.0457445987027705	0.000124560898851821	0.00482403517393011	21.7199327924316	0.897264543832325
TGGT1_226710:E013	TGGT1_226710	E013	0.020655157622565	0.000125227759661016	0.00484741832195137	178.990867806521	-0.490382613226959
TGGT1_280380:E011	TGGT1_280380	E011	0.000653196983979761	0.000125331449875533	0.00484898923166481	1604.75820487635	-0.0938428040273466
TGGT1_209950:E013	TGGT1_209950	E013	0.00368554003603049	0.000125638339230969	0.00485841624131352	274.473003680291	-0.233646915312043
TGGT1_290710:E006	TGGT1_290710	E006	0.0200732348924118	0.000125749613017075	0.00486027314657594	49.5450914889304	0.562770914213343
TGGT1_213040:E012	TGGT1_213040	E012	0.064515089904713	0.000126706139363281	0.00489232142223942	15.3971934546342	1.04907914670735
TGGT1_290640:E006	TGGT1_290640	E006	0.0170716587877695	0.000126658563482861	0.00489232142223942	60.5759383771456	-0.498348466580778
TGGT1_226710:E006	TGGT1_226710	E006	0.0181199390801555	0.000126979371812891	0.00490040883575446	54.8961559785922	-0.550960404311195
TGGT1_223800:E012	TGGT1_223800	E012	0.0331964465014499	0.000127445522176423	0.00491592951178203	29.9385463726952	0.726548548649316
TGGT1_252380:E018	TGGT1_252380	E018	0.0307159006304298	0.000127747414794767	0.0049251019119847	35.6976914720277	0.696375074608554
TGGT1_234280:E020	TGGT1_234280	E020	0.0234578955398917	0.000128186253146932	0.00493954219310471	42.385860600422	0.595296199934776
TGGT1_292960:E013	TGGT1_292960	E013	0.0152729159165125	0.000128376437868991	0.00494439115616021	65.1525290712395	-0.479759606065159
TGGT1_229780:E010	TGGT1_229780	E010	0.0492657621938353	0.000128610107824315	0.00495090924594033	20.1664590638653	0.914400386103918
TGGT1_209250:E016	TGGT1_209250	E016	0.00111370043974479	0.00012880761507887	0.00495602940401359	919.979501019382	-0.0935184210097978
No_genes_on_ref_contig_268+No_genes_on_ref_contig_269+No_genes_on_ref_contig_272+No_genes_on_ref_contig_271+No_genes_on_ref_contig_270:E007	No_genes_on_ref_contig_268+No_genes_on_ref_contig_269+No_genes_on_ref_contig_272+No_genes_on_ref_contig_271+No_genes_on_ref_contig_270	E007	0.000492059946902563	0.000129799376448961	0.00499168903313756	2169.92968166091	0.0737612810947327
TGGT1_295760:E012	TGGT1_295760	E012	0.044424109582333	0.000131962865569538	0.00507235152664664	22.366051356008	0.828253977399029
[truncated: 1,164 more rows]
