# Supplementary material for: A serine–arginine-rich (SR) splicing factor modulates alternative splicing of over a thousand genes in Toxoplasma gondii
Source: Oxford University Press journal article supplement (doi:10.1093/nar/gkv311), 2015-04-13
Supplement: gkv311_Supplementary_Data.zip [file gkv311_Supplementary_Data.zip › nar-03398-a-2014-File019.txt]

geneID	exonID	dispersion	pvalue	padjust	meanBase	log2fold(treated/untreated)
TGGT1_210690:E002	TGGT1_210690	E002	0.00087793042117755	0	0	2413.34395831814	1.0825654713161
TGGT1_250220:E045	TGGT1_250220	E045	0.00308071094384088	8.16288235764604e-267	3.29515153572276e-262	328.070492815834	2.81041665215381
TGGT1_206400:E021	TGGT1_206400	E021	0.000954608560818029	9.22798687032656e-188	2.48340506658605e-183	1101.88575781835	0.891722897929134
TGGT1_206400:E013	TGGT1_206400	E013	0.00200436500605686	2.04169012576579e-183	4.12089630759253e-179	643.455806414849	2.18346369122857
TGGT1_206400:E016	TGGT1_206400	E016	0.00177439491414142	4.38462320890431e-157	7.07985109541779e-153	577.064770655075	1.73943902682329
TGGT1_269442:E007	TGGT1_269442	E007	0.00172742605765553	1.17936056038181e-154	1.58692791404043e-150	656.295571725851	1.08542770443926
TGGT1_286050:E014	TGGT1_286050	E014	0.00312800218483962	2.05038107516808e-154	2.36482165862422e-150	323.024659076919	1.42456284008235
TGGT1_366970:E001	TGGT1_366970	E001	0.00126230788587785	2.97942497113047e-152	3.00679843805273e-148	5673.00432776304	0.227450091271467
TGGT1_263050:E004	TGGT1_263050	E004	0.00338192052239904	1.4760426650784e-139	1.32409227294561e-135	298.383877767457	1.86916916309824
TGGT1_206400:E027	TGGT1_206400	E027	0.00155221584184819	8.89674144133738e-138	7.18278420266373e-134	662.596267783358	1.16760307721912
TGGT1_206400:E004	TGGT1_206400	E004	0.00102759519182988	3.78852316301551e-133	2.78060379605507e-129	1547.02361882941	-1.10326515010889
TGGT1_206550:E001	TGGT1_206550	E001	0.00640510306373363	5.45309498320909e-130	3.66879686224488e-126	156.367986052866	-2.01459993012981
TGGT1_229030:E014	TGGT1_229030	E014	0.00223617160174387	1.08296541772906e-129	6.72563176925815e-126	543.551831562041	1.16349381146622
TGGT1_206400:E006	TGGT1_206400	E006	0.0016022039740241	1.24614839978245e-128	7.18627078974545e-125	2712.30527437823	-1.08842732022045
TGGT1_297060:E001	TGGT1_297060	E001	0.00610598499477512	6.7583074941655e-124	3.63754637027634e-120	164.0954391813	2.70087949953713
TGGT1_229030:E020	TGGT1_229030	E020	0.00178652960595202	7.28264990819416e-115	3.67477962711285e-111	573.024819415489	-0.917217307215482
TGGT1_206400:E014	TGGT1_206400	E014	0.00271571439428816	2.81874823579171e-112	1.33865669892143e-108	373.045013889691	2.09939595743498
TGGT1_321685:E014	TGGT1_321685	E014	0.00350590146013777	1.12847074798261e-107	5.06150476879868e-104	287.669345107664	-1.00247548286954
TGGT1_206400:E026	TGGT1_206400	E026	0.00158586298979348	3.44586134528859e-104	1.46421903006249e-100	648.049883460277	0.842554540961318
TGGT1_264260:E014	TGGT1_264260	E014	0.00468692410508738	1.49092297869865e-102	6.01848333426176e-99	214.349232899709	1.44661598791068
TGGT1_254440:E002	TGGT1_254440	E002	0.00558950258927559	1.35105211215524e-100	5.19415201308827e-97	179.403968311247	2.35761408732667
TGGT1_206400:E009	TGGT1_206400	E009	0.00470062043685472	2.28600524562749e-97	8.38911970480614e-94	457.402964407775	1.84525871674588
TGGT1_206400:E007	TGGT1_206400	E007	0.00216242846692368	5.06163482883162e-97	1.77674386045966e-93	2283.21595097804	-1.1180743349656
TGGT1_258400:E001	TGGT1_258400	E001	0.00126381495644647	2.03372861635852e-92	6.84137832673771e-89	1370.10074226105	-0.235751533526965
TGGT1_206400:E018	TGGT1_206400	E018	0.00259291111429733	9.95504978394972e-92	3.21488377722872e-88	391.083064176022	1.38171371820375
TGGT1_290710:E002	TGGT1_290710	E002	0.00376835215806383	8.67629855978931e-90	2.69415755470996e-86	267.347339753426	1.30042249359838
TGGT1_206400:E023	TGGT1_206400	E023	0.00217598086289815	6.1405494884815e-86	1.83613801093538e-82	520.509030807272	0.916131303248888
TGGT1_250220:E028	TGGT1_250220	E028	0.00624123370797444	1.2042311676715e-85	3.47227154721281e-82	294.163678829081	1.56823998455781
TGGT1_290040:E003	TGGT1_290040	E003	0.0129755651053782	2.35507461391793e-84	6.55644651567807e-81	76.86155151692	2.662323946587
TGGT1_275810:E002	TGGT1_275810	E002	0.00458800270867593	3.31030544771671e-80	8.90858367738028e-77	219.025026050554	1.47955105714786
TGGT1_250220:E027	TGGT1_250220	E027	0.00633630144423896	6.51255065534121e-79	1.69609928115798e-75	194.704852172282	1.64434314195353
TGGT1_290710:E004	TGGT1_290710	E004	0.00558889894203692	8.51635027086982e-79	2.14864855974586e-75	213.850756013768	1.51013631630297
TGGT1_206400:E024	TGGT1_206400	E024	0.00216501023889678	1.22722660739195e-77	3.00242848932695e-74	470.325998353489	0.86988008792424
TGGT1_206400:E029	TGGT1_206400	E029	0.00280509432853592	2.7335464372606e-74	6.49096681212454e-71	360.928658169791	1.15239880469393
TGGT1_206400:E022	TGGT1_206400	E022	0.00259696202648148	2.24350077410381e-72	5.17511528563631e-69	390.460264955524	1.00482291075584
TGGT1_211420:E006	TGGT1_211420	E006	0.00394781079602671	2.16855917169269e-71	4.86329513129471e-68	2493.75715424166	0.929012170461546
TGGT1_273130:E004	TGGT1_273130	E004	0.0107549557052907	2.58147798154582e-71	5.63285472540815e-68	1240.29162775058	-0.721480642148739
TGGT1_210690:E005	TGGT1_210690	E005	0.000134638786552848	6.43328867654042e-71	1.36681989815919e-67	12198.4244969244	-0.0968660594278354
TGGT1_269430:E051	TGGT1_269430	E051	0.00335530888759185	1.77680228320872e-70	3.67820852140656e-67	300.788559478029	1.73881859209957
TGGT1_232410:E006	TGGT1_232410	E006	0.00506261553671306	4.12197958911214e-70	8.31970055317421e-67	310.479686730789	1.26404160253693
TGGT1_225060:E032	TGGT1_225060	E032	0.00540777131948814	6.24239923047782e-70	1.22921976066494e-66	185.492860473573	1.68642846873602
TGGT1_224350A:E017	TGGT1_224350A	E017	0.00463252645914385	6.64454482133399e-69	1.27725553845333e-65	216.895488137282	1.34025250605396
TGGT1_227440:E017	TGGT1_227440	E017	0.015583309373024	2.2199838791858e-68	4.16814880200152e-65	116.307767373215	3.18493418900728
TGGT1_258400:E003	TGGT1_258400	E003	0.00629453152942784	1.69183143237969e-67	3.10431842484487e-64	475.505007492654	1.1286192550356
TGGT1_266870:E005	TGGT1_266870	E005	0.00521959447266449	2.99498413828926e-67	5.3733343201063e-64	192.249132901821	1.36790504915751
TGGT1_278830:E028	TGGT1_278830	E028	0.00290876987414611	4.49525419522231e-67	7.88965972720159e-64	347.824554743723	1.00011826339598
TGGT1_250220:E038	TGGT1_250220	E038	0.00494950617410225	6.67505031801494e-67	1.14661742005306e-63	202.853945429878	1.31490231880649
TGGT1_228990:E036	TGGT1_228990	E036	0.00223227030913608	8.81881864961896e-66	1.48330692432706e-62	455.808619391418	-0.593516409274032
TGGT1_269430:E046	TGGT1_269430	E046	0.00382912150206139	2.26021123210376e-62	3.72404395558974e-59	263.044657467946	1.76618560214959
TGGT1_206400:E012	TGGT1_206400	E012	0.00768103862267563	3.26015364398013e-62	5.26417008893472e-59	214.638633553466	2.86534724112725
TGGT1_233260:E023	TGGT1_233260	E023	0.00500905208400616	4.33098400199745e-62	6.85611751767185e-59	200.416592350853	1.30658854360786
TGGT1_306430:E005	TGGT1_306430	E005	0.00844310546006896	5.90316332262814e-61	9.16522867023813e-58	118.384371934749	2.09910672630796
[TGGT1_276820,TGGT1_276810]:E001	[TGGT1_276820,TGGT1_276810]	E001	0.014619262720379	9.85540471531633e-59	1.50127565979446e-55	68.188151668266	2.51921126836835
TGGT1_253080:E001	TGGT1_253080	E001	0.0107985059493751	1.11610549210016e-58	1.66868105379086e-55	92.434155195481	2.57114995332217
TGGT1_238050:E001	TGGT1_238050	E001	0.0108279552788611	1.21943135447906e-58	1.79001437097939e-55	140.772987772739	1.88726365137607
TGGT1_282055:E035	TGGT1_282055	E035	0.0203702477522213	1.38564203181329e-57	1.99767516854368e-54	48.8866591544045	3.65128010356422
TGGT1_301460:E002	TGGT1_301460	E002	0.00670775917300969	1.53226353061809e-56	2.17030344113073e-53	149.25619433118	1.46307437615552
TGGT1_250810:E004	TGGT1_250810	E004	0.00399607677073027	9.61133184546626e-56	1.3378808216271e-52	251.906376890699	1.15003890329007
TGGT1_252190:E014	TGGT1_252190	E014	0.0186443962754767	3.36629119683709e-55	4.60639864028208e-52	240.953519213887	1.98564061391093
TGGT1_318430:E003	TGGT1_318430	E003	0.0190879472136114	5.11400032066437e-55	6.8813135981473e-52	91.5839748840468	2.57328345084871
TGGT1_263090:E004	TGGT1_263090	E004	0.00954305166068897	6.58153782825078e-55	8.71082715678404e-52	304.841382997679	1.4921577378415
TGGT1_206550:E002	TGGT1_206550	E002	0.00405458698650228	1.90824715636447e-54	2.48487635756589e-51	248.222865443842	-1.18363059134948
TGGT1_218780:E023	TGGT1_218780	E023	0.00298510785867673	3.01382661858143e-54	3.86224273097098e-51	451.822900500575	0.812971591889363
TGGT1_285470:E008	TGGT1_285470	E008	0.00391030712385928	1.10721978242719e-53	1.3967404552228e-50	257.507986842871	0.971036384772956
TGGT1_206400:E025	TGGT1_206400	E025	0.00285890635670621	5.53516880523726e-53	6.77093717410349e-50	354.006190092588	0.769413673518827
TGGT1_314090:E002	TGGT1_314090	E002	0.0100045754748916	5.46870632620416e-53	6.77093717410349e-50	208.247804698112	1.57663128658892
TGGT1_263090:E005	TGGT1_263090	E005	0.00120839027749301	1.5573566103909e-52	1.87661471552103e-49	1354.72639984452	0.494614097160243
TGGT1_312100:E013	TGGT1_312100	E013	0.000834701013754501	1.9497578881467e-52	2.31490739852241e-49	1270.9541173191	0.369584869717936
TGGT1_250220:E026	TGGT1_250220	E026	0.00795033190015712	2.04902278567841e-52	2.39750513915575e-49	125.771459557834	1.52674436223185
TGGT1_227440:E019	TGGT1_227440	E019	0.0196909821302518	3.07909090847889e-52	3.55129149280062e-49	119.660959855479	2.57662770524063
TGGT1_297650:E005	TGGT1_297650	E005	0.00399864291466732	2.37137673944696e-51	2.69652255013029e-48	251.742534546758	1.02418735466462
TGGT1_215010:E017	TGGT1_215010	E017	0.0104332359173238	6.68394165092407e-51	7.49483373871326e-48	150.515107111203	1.56803062041428
TGGT1_297430:E018	TGGT1_297430	E018	0.0103989643850007	7.96566030376859e-51	8.80969294006517e-48	96.0038618014573	1.92946346058227
TGGT1_366970:E005	TGGT1_366970	E005	0.00552121017133359	2.16500643081533e-50	2.36205127286318e-47	181.644630977412	-0.960712090211454
TGGT1_316200:E002	TGGT1_316200	E002	0.00658926725279645	4.18947815185626e-50	4.50983358120154e-47	214.77265079154	1.22304200793193
TGGT1_225060:E028	TGGT1_225060	E028	0.00901216549405713	1.07551466410973e-49	1.14252205798551e-46	110.864761129192	2.02124721340135
TGGT1_265520:E008	TGGT1_265520	E008	0.00593095641449369	2.73637602666796e-49	2.86910803263686e-46	168.981907259792	1.26793415170242
TGGT1_225060:E018	TGGT1_225060	E018	0.00844647235245232	3.63550106695103e-49	3.7629766492345e-46	118.336882925089	-1.50603717197602
TGGT1_250220:E003	TGGT1_250220	E003	0.000981787479423564	7.57242777667241e-49	7.73873362721072e-46	1069.63400506256	-0.476220253064042
TGGT1_290040:E005	TGGT1_290040	E005	0.0130171062945769	1.53127028686466e-48	1.54533883262523e-45	76.6152581482854	1.75106286464478
TGGT1_275320:E002	TGGT1_275320	E002	0.00751537011166174	1.10597087452785e-47	1.10235257475316e-44	133.102556840187	1.45930437586643
TGGT1_229030:E007	TGGT1_229030	E007	0.00474772285996689	1.75957612838413e-46	1.73243144786698e-43	268.647963174684	1.00880227793569
TGGT1_250220:E001	TGGT1_250220	E001	0.00139286870654336	2.17179651306629e-46	2.11253001786033e-43	2053.60313581352	-0.456181329914276
TGGT1_315690:E004	TGGT1_315690	E004	0.00827240432210427	1.39508992445924e-45	1.34086410775258e-42	120.843051039199	1.78784519627298
TGGT1_209040:E001	TGGT1_209040	E001	0.00609852546710814	1.70482874562227e-45	1.61928645620958e-42	1180.53810492045	-0.705166070208445
TGGT1_207750:E020	TGGT1_207750	E020	0.0108952373857497	1.95094028854528e-45	1.83150190925236e-42	91.6094668701223	1.91240011737803
TGGT1_229030:E012	TGGT1_229030	E012	0.00488461300431868	9.74034955078507e-45	9.03893242508773e-42	205.578589055952	1.07473645535624
TGGT1_206400:E011	TGGT1_206400	E011	0.00640278987251409	1.11147580690375e-44	1.00825841876825e-41	156.424951929602	1.83943702427481
TGGT1_240610:E009	TGGT1_240610	E009	0.00263488032745252	1.11142983004883e-44	1.00825841876825e-41	384.725364140262	-0.508688401606445
TGGT1_297430:E016	TGGT1_297430	E016	0.0129153539627897	2.72567204111638e-44	2.4450792471059e-41	112.939461024033	1.7991459486865
TGGT1_204020:E002	TGGT1_204020	E002	0.00676220169333052	7.71904240833669e-44	6.84831745974794e-41	148.045000336179	1.33608125704891
TGGT1_230340:E004	TGGT1_230340	E004	0.00630539560277065	9.81402107660462e-44	8.61233686543124e-41	158.861685118851	1.11270269481733
TGGT1_206400:E010	TGGT1_206400	E010	0.00539037436026975	1.55851028494791e-43	1.35297126726096e-40	186.097491516352	1.34620784559737
TGGT1_270000:E043	TGGT1_270000	E043	0.0114803342906708	3.38839156445446e-43	2.9102318399599e-40	86.9188341702586	2.22847787787392
TGGT1_258080:E035	TGGT1_258080	E035	0.00303215327684936	1.91620726713961e-42	1.62847361802649e-39	441.155965131176	-0.649521915856357
TGGT1_209040:E005	TGGT1_209040	E005	0.00695961144454085	4.3095658760045e-42	3.62430001040858e-39	379.011059791003	0.770609617327817
TGGT1_225060:E024	TGGT1_225060	E024	0.0142916207533105	1.32139768995538e-41	1.0998251803974e-38	142.846199416415	-1.61413853834004
TGGT1_290710:E006	TGGT1_290710	E006	0.00825824718055999	1.42192727130414e-41	1.17142141070143e-38	121.051556297089	1.36720966105672
TGGT1_244710:E002	TGGT1_244710	E002	0.00153217196728829	6.70517500921057e-41	5.46810408453147e-38	671.576247730475	0.315700587103526
TGGT1_263090:E003	TGGT1_263090	E003	0.00941885545540272	1.39048785068317e-40	1.12261036624906e-37	106.050612046912	1.50853247663121
TGGT1_288710:E012	TGGT1_288710	E012	0.0149942198360142	3.33721912119037e-40	2.66762758167628e-37	66.4769124064356	3.80993276193845
TGGT1_315780:E008	TGGT1_315780	E008	0.0125822651636604	4.0188838603503e-40	3.18102537711158e-37	79.2743158792898	1.62199775488382
TGGT1_214780:E002	TGGT1_214780	E002	0.0229881623215946	5.24749435163041e-40	4.11316948037749e-37	43.3064805704734	2.59838871670116
TGGT1_262110:E001	TGGT1_262110	E001	0.00602826746356334	7.88020438454832e-40	6.11738750948566e-37	166.229829508563	-0.589298411548484
TGGT1_225060:E009	TGGT1_225060	E009	0.007836380582209	4.6234204870208e-39	3.55497002875832e-36	127.612847223276	1.39783586545277
TGGT1_225060:E027	TGGT1_225060	E027	0.0116862386689178	7.05631316208017e-39	5.32421909477142e-36	85.3803717471881	-1.59899083663274
TGGT1_293870:E004	TGGT1_293870	E004	0.00392075248644409	7.04977384375964e-39	5.32421909477142e-36	256.812514626714	0.851018585386001
TGGT1_250810:E002	TGGT1_250810	E002	0.00504382972789426	7.92751015089211e-39	5.92618085215069e-36	326.665651630396	0.937878387217327
TGGT1_248880:E019	TGGT1_248880	E019	0.00320085679936975	9.59735987590105e-39	7.10864999615479e-36	315.548000451204	0.754931573071226
TGGT1_275320:E003	TGGT1_275320	E003	0.00950131586989056	1.41569985292049e-38	1.03905934205033e-35	105.125031518857	1.47933467386562
TGGT1_263050:E003	TGGT1_263050	E003	0.0121891496677452	1.4530659000857e-38	1.05687635534612e-35	81.842223912674	1.83006888465226
TGGT1_260450:E011	TGGT1_260450	E011	0.00619710391171407	8.93451919490264e-38	6.440432207147e-35	498.5697531263	-0.578106647107334
TGGT1_224350A:E002	TGGT1_224350A	E002	0.00553348336037792	1.70915904639869e-37	1.22114120009733e-34	181.237833520605	1.02025788480822
TGGT1_210255:E006	TGGT1_210255	E006	0.00944057745202062	3.13479373308204e-37	2.22006642140683e-34	105.805214977061	-1.25555264527421
TGGT1_269425:E005	TGGT1_269425	E005	0.00348256780769278	5.22233994598229e-37	3.66630970033809e-34	289.626675984509	0.661008340439189
TGGT1_289350:E021	TGGT1_289350	E021	0.0071835563020415	5.56946605725432e-37	3.87630036321058e-34	139.296548082942	-1.1866975155401
TGGT1_207470:E001	TGGT1_207470	E001	0.00352540107677592	7.09258968720755e-37	4.89418998629659e-34	286.053808623891	-0.375284423411476
TGGT1_269920:E016	TGGT1_269920	E016	0.00270366214433331	9.39241633468986e-37	6.42624349814564e-34	374.741343946917	-0.724864431345706
TGGT1_243960:E029	TGGT1_243960	E029	0.0164459974489114	1.19747495245508e-36	8.12421346945047e-34	60.5895837372196	2.42076347119799
TGGT1_300290:E005	TGGT1_300290	E005	0.0159424962926949	1.96192809970928e-36	1.31996887608357e-33	91.8857524733578	2.01769937568004
TGGT1_229030:E016	TGGT1_229030	E016	0.00784211897168973	2.93275687517142e-36	1.95682749022285e-33	234.173845676094	1.08878028570649
TGGT1_290330:E003	TGGT1_290330	E003	0.0117570831173806	4.30406855917999e-36	2.84827028791309e-33	84.8635575014085	1.77114094461704
TGGT1_249010:E001	TGGT1_249010	E001	0.0043355822175228	9.03670200331487e-36	5.93152956290753e-33	413.98926147969	0.558994233932861
TGGT1_275320:E001	TGGT1_275320	E001	0.0104325988414235	9.82787025180069e-36	6.39881536112201e-33	95.692760678978	1.49388557817183
TGGT1_254470:E008	TGGT1_254470	E008	0.0027171609451318	1.01656879204878e-35	6.56581451408467e-33	372.842446435862	-0.667035723529685
TGGT1_300055:E013	TGGT1_300055	E013	0.000956024815413696	1.06616490545354e-35	6.8314939398247e-33	1551.55478791761	0.291726455532115
TGGT1_235680:E035	TGGT1_235680	E035	0.00142761568099962	2.72313935905099e-35	1.73112327679513e-32	854.416241063933	-0.432465986817666
TGGT1_220600:E003	TGGT1_220600	E003	0.0110178231783644	3.17823789113396e-35	2.00464871984922e-32	90.5852606447433	1.53511234617066
TGGT1_250220:E032	TGGT1_250220	E032	0.0113118097363137	6.79452704702986e-35	4.25237318714694e-32	88.2198809894973	1.45580578578015
TGGT1_238230:E006	TGGT1_238230	E006	0.00535867694708028	1.73576490210094e-34	1.07797676439323e-31	187.209328725124	1.15289735110789
TGGT1_250220:E022	TGGT1_250220	E022	0.00653962888861256	2.08006638497782e-34	1.28194014955103e-31	153.124971445072	1.02992638686204
TGGT1_229030:E005	TGGT1_229030	E005	0.00532801928825563	3.42555504143143e-34	2.09516807780278e-31	188.297407128778	0.955576402749075
TGGT1_216680:E023	TGGT1_216680	E023	0.00102599996981585	4.49729915711908e-34	2.70962274216425e-31	1021.01974303947	0.298887930471192
TGGT1_216880:E007	TGGT1_216880	E007	0.00879723401592436	4.49639615605364e-34	2.70962274216425e-31	950.357682308931	0.994139695210115
TGGT1_306430:E002	TGGT1_306430	E002	0.0136637494952155	4.64300126113973e-34	2.77668671717123e-31	72.9752292590912	1.89386674017572
TGGT1_226290:E016	TGGT1_226290	E016	0.00420473403645568	7.66418591094266e-34	4.54976506999967e-31	239.245443425163	-0.793310664022449
TGGT1_282055:E034	TGGT1_282055	E034	0.0108786339245007	8.89587468997277e-34	5.24239739485366e-31	91.7499726888939	1.36225094469812
TGGT1_224350B:E003	TGGT1_224350B	E003	0.00602334019836591	9.9854003666676e-34	5.8418210043689e-31	166.36702237137	0.913253585918003
TGGT1_294360:E004	TGGT1_294360	E004	0.00985968807270033	1.72659398202831e-33	1.00285298661191e-30	101.283294329886	1.33230146197972
TGGT1_306430:E021	TGGT1_306430	E021	0.012525205171345	1.77989119379885e-33	1.02642511093822e-30	79.6369999491904	1.7185679538087
TGGT1_273130:E001	TGGT1_273130	E001	0.0206905992605796	2.30447310674762e-33	1.31951515087425e-30	48.1277976907059	1.50554522014923
TGGT1_226290:E014	TGGT1_226290	E014	0.00483480672848957	3.75527415103388e-33	2.13508491960366e-30	724.921637173827	-0.638623396491492
TGGT1_300055:E008	TGGT1_300055	E008	0.00175545384298638	6.41898115817338e-33	3.62403107556033e-30	605.93390084372	-0.437526434611857
TGGT1_298840:E002	TGGT1_298840	E002	0.00744630077239071	7.26342846434228e-33	4.07231178519912e-30	134.346057452602	1.09878970610161
TGGT1_224340:E002	TGGT1_224340	E002	0.00996612661587875	7.79382286149108e-33	4.33954681877574e-30	100.195778611522	1.16867467469257
TGGT1_299080:E008	TGGT1_299080	E008	0.0105825725361738	8.04565527170964e-33	4.44908204357176e-30	94.3297717255824	1.53311726867185
TGGT1_202760:E002	TGGT1_202760	E002	0.0107577010093382	1.51743941858421e-32	8.33404567750994e-30	92.7865093812398	1.57901087105443
TGGT1_278830:E032	TGGT1_278830	E032	0.0115818737702645	1.54723395147262e-32	8.44026574811769e-30	216.575078357135	1.23207265778777
TGGT1_218790:E019	TGGT1_218790	E019	0.0136388925811289	1.64192839713228e-32	8.89671739211241e-30	73.1087477460303	1.58940208311882
TGGT1_314090:E005	TGGT1_314090	E005	0.0160756002162398	1.8452255888785e-32	9.9316191945404e-30	61.9902625376345	1.94204447816004
TGGT1_260270:E002	TGGT1_260270	E002	0.00699866955700443	2.10253325878281e-32	1.12415909038298e-29	143.00459745942	1.15210273064279
TGGT1_235920:E057	TGGT1_235920	E057	0.00747889156924478	2.56168418830074e-32	1.36064192725303e-29	133.756421543489	-1.07841161856264
TGGT1_258080:E011	TGGT1_258080	E011	0.0135696846994457	4.65578173944826e-32	2.45676169107422e-29	73.4830837957824	1.85639406068356
TGGT1_229030:E019	TGGT1_229030	E019	0.00530095307147003	5.73641559029603e-32	3.00733449793864e-29	189.268587316517	-0.891436745813701
TGGT1_206550:E036	TGGT1_206550	E036	0.00384692476699319	6.18054537369751e-32	3.21926664997077e-29	261.810231263708	1.35226392107339
TGGT1_316220:E002	TGGT1_316220	E002	0.0132102744757965	8.2710980506151e-32	4.28055834048981e-29	75.4904147873098	1.46844897614769
TGGT1_286440:E007	TGGT1_286440	E007	0.0178601226095147	1.077112248145e-31	5.5388953728654e-29	55.7778971324892	2.17595155019461
TGGT1_205500:E015	TGGT1_205500	E015	0.0147344051810449	1.27931316423799e-31	6.53704736169328e-29	67.6533617828942	1.81556040988786
TGGT1_269930:E028	TGGT1_269930	E028	0.0103182982217482	1.30735820549265e-31	6.63833740380183e-29	96.7582895684971	1.23716620183495
TGGT1_293350:E007	TGGT1_293350	E007	0.0270387860594488	1.67352981508966e-31	8.44452685132898e-29	36.8060339726868	3.36878119895572
TGGT1_308860:E007	TGGT1_308860	E007	0.00665663494298645	1.76809461985671e-31	8.86628069156096e-29	167.370171101258	0.990394892761354
TGGT1_290710:E007	TGGT1_290710	E007	0.00093226898122562	2.74093762039579e-31	1.3659851776707e-28	1129.88823354177	-0.236777603478844
TGGT1_209120:E002	TGGT1_209120	E002	0.0115275711393143	4.92739792267521e-31	2.44057344347965e-28	86.561012601856	1.22493941788678
TGGT1_257380:E003	TGGT1_257380	E003	0.0110262572604588	5.51357420413274e-31	2.71425861811376e-28	90.515635142142	1.34182530932518
TGGT1_304520:E011	TGGT1_304520	E011	0.00954561570540977	7.06990876204612e-31	3.45932778123511e-28	104.634426227752	1.24247242176302
TGGT1_244165:E046	TGGT1_244165	E046	0.00545544076034568	7.36690653782774e-31	3.58293493573206e-28	183.856064328977	0.855076482376999
TGGT1_258030:E012	TGGT1_258030	E012	0.020082801168915	7.96430528579962e-31	3.85028854640139e-28	49.5882364913224	2.56259022478762
TGGT1_285980A:E012	TGGT1_285980A	E012	0.00638207584093641	1.05970333454479e-30	5.09256837586154e-28	156.936922709028	0.928760627449279
TGGT1_289350:E025	TGGT1_289350	E025	0.0104373154188015	1.0679180963171e-30	5.10167855066041e-28	164.709479481919	-1.1765355354523
TGGT1_240770:E010	TGGT1_240770	E010	0.00447359263488075	1.78868024965016e-30	8.49465293855915e-28	241.798094403064	-0.611106887909498
TGGT1_227150:E008	TGGT1_227150	E008	0.00198161784054023	2.18343851715286e-30	1.03087665896103e-27	515.054334186697	0.468662405946475
TGGT1_228470:E002	TGGT1_228470	E002	0.017934708943724	2.33452007197949e-30	1.09579929076317e-27	423.206779181911	1.39471959285049
TGGT1_293440:E006	TGGT1_293440	E006	0.00872734098583722	3.04203427426217e-30	1.41964530134426e-27	114.505128369947	1.04749018186685
TGGT1_219530:E011	TGGT1_219530	E011	0.0108412294674827	3.08294988567947e-30	1.43047102885248e-27	92.0680903725069	1.90891780455134
TGGT1_209300:E024	TGGT1_209300	E024	0.0240175266216869	5.28066024226009e-30	2.43619488376496e-27	41.4462916651765	-1.89296686920078
TGGT1_225060:E025	TGGT1_225060	E025	0.0106399039230239	7.48295276338937e-30	3.43259199631955e-27	93.8189361757266	1.4365206065187
TGGT1_214620:E005	TGGT1_214620	E005	0.0232962688145013	1.20582436587561e-29	5.5001259988117e-27	42.732416231493	2.34625081731792
TGGT1_224830:E001	TGGT1_224830	E001	0.00573536290109508	1.97162325979816e-29	8.94264066740475e-27	174.798681186157	-0.840441489872246
TGGT1_307790:E021	TGGT1_307790	E021	0.00443298561980802	2.07907261911088e-29	9.37731440804005e-27	226.777173661028	-0.40232194438163
TGGT1_306430:E011	TGGT1_306430	E011	0.0213579005866677	2.27789161519088e-29	1.0216976641802e-26	46.6203478699648	2.63393982188246
TGGT1_286440:E003	TGGT1_286440	E003	0.0132480033094069	2.57897397631373e-29	1.15035062971099e-26	125.860993506791	1.32083143568325
TGGT1_238230:E008	TGGT1_238230	E008	0.00616017925067382	2.67409116453084e-29	1.18622390202416e-26	162.639227704826	1.13771003024339
TGGT1_289170:E001	TGGT1_289170	E001	0.00225427073295579	3.4725592584326e-29	1.53200585644566e-26	451.252629995706	-0.0738007976728992
TGGT1_279350:E001	TGGT1_279350	E001	0.000706846140733524	4.00216096170132e-29	1.75605687632041e-26	1519.56204456606	0.0427471778802116
TGGT1_225060:E015	TGGT1_225060	E015	0.0149038840453981	4.89787728312373e-29	2.13746012136754e-26	66.881287775406	1.94660619093116
TGGT1_288640:E023	TGGT1_288640	E023	0.00524479971989574	5.24254705586409e-29	2.27557546535047e-26	641.803335365619	-0.736979325882088
TGGT1_285470:E009	TGGT1_285470	E009	0.00747550193396526	5.45986221864597e-29	2.35722981937103e-26	133.817505888507	0.997030982444616
TGGT1_209120:E005	TGGT1_209120	E005	0.0127303753561272	7.85689072593734e-29	3.37407485509868e-26	78.348135676515	1.25351568326047
TGGT1_408560:E008	TGGT1_408560	E008	0.00380257181831486	7.90648221554112e-29	3.3774065696916e-26	357.702826601378	0.560770498002041
TGGT1_263980:E022	TGGT1_263980	E022	0.0141519204619512	1.02761101265944e-28	4.36653553195051e-26	70.4484447679214	1.78873199634661
TGGT1_291800:E009	TGGT1_291800	E009	0.0249512257140439	1.26719551817341e-28	5.35638901359846e-26	39.892016239705	2.31159737902575
TGGT1_240610:E003	TGGT1_240610	E003	0.0128030005530756	1.35990151558499e-28	5.70242813748076e-26	77.9018498052905	1.54472837263767
TGGT1_250220:E002	TGGT1_250220	E002	0.00128087668310193	1.36318651208743e-28	5.70242813748076e-26	815.982400371984	-0.421292873114013
TGGT1_266920:E010	TGGT1_266920	E010	0.00329737195564716	1.9062904015438e-28	7.93321420456902e-26	815.463929786032	-0.576179851831943
No_genes_on_ref_contig_268+No_genes_on_ref_contig_269+No_genes_on_ref_contig_272+No_genes_on_ref_contig_271+No_genes_on_ref_contig_270:E001	No_genes_on_ref_contig_268+No_genes_on_ref_contig_269+No_genes_on_ref_contig_272+No_genes_on_ref_contig_271+No_genes_on_ref_contig_270	E001	0.00165096779113703	2.17686291875979e-28	9.01277065364469e-26	621.643307288624	0.438436530483292
TGGT1_290710:E003	TGGT1_290710	E003	0.00212978946598046	2.35160832411209e-28	9.68658663506069e-26	478.303199296447	-0.45133497275192
TGGT1_273070:E019	TGGT1_273070	E019	0.0111929582526655	3.25888906678252e-28	1.3355655269375e-25	90.1890917545214	1.31115587979057
TGGT1_306430:E026	TGGT1_306430	E026	0.010382139551356	6.01400561168884e-28	2.45222597504898e-25	96.1602429547398	1.28378092066944
TGGT1_224350A:E019	TGGT1_224350A	E019	0.0122587130065727	6.44552090541529e-28	2.61497050401359e-25	81.3757768463197	1.39302176499763
TGGT1_269438:E002	TGGT1_269438	E002	0.00817963577399813	6.74556915771366e-28	2.72301762974006e-25	122.222555724883	1.11988711329072
TGGT1_271145:E004	TGGT1_271145	E004	0.0189781119732315	7.20487666364788e-28	2.8939587932319e-25	52.4828145468102	1.92796352874188
TGGT1_225060:E031	TGGT1_225060	E031	0.0139650719295994	7.39254018263608e-28	2.9546372853719e-25	71.3946296921348	1.73523201695038
TGGT1_200350:E007	TGGT1_200350	E007	0.0025915475422366	7.80663941361961e-28	3.10477356186492e-25	391.293150957313	-0.593207279179097
TGGT1_309110:E007	TGGT1_309110	E007	0.0076923880066349	8.38296006686951e-28	3.31763863234662e-25	130.018252170021	1.0316350343865
TGGT1_219620:E003	TGGT1_219620	E003	0.017250155297645	9.20496541131155e-28	3.62518479259628e-25	57.7563127706497	1.77674898237763
TGGT1_288640:E022	TGGT1_288640	E022	0.00175680415383131	1.30957072996383e-27	5.13243654774901e-25	1101.09771154834	-0.443692023024095
TGGT1_243280A:E001	TGGT1_243280A	E001	0.0149327140753131	1.64121565915008e-27	6.40113749958847e-25	66.7517007762182	1.5619481620351
TGGT1_292960:E022	TGGT1_292960	E022	0.0036580122964727	1.88331978134117e-27	7.3100876224317e-25	275.530622421802	-0.643182040964532
TGGT1_273100:E002	TGGT1_273100	E002	0.0115544950595153	1.9726447392221e-27	7.62016617325817e-25	86.3583775950146	1.38488076988268
TGGT1_240810:E009	TGGT1_240810	E009	0.000590050792388377	2.7205971039785e-27	1.04594003423669e-24	1850.16230355203	-0.140582304153934
TGGT1_259115:E005	TGGT1_259115	E005	0.00134593149635077	3.09297979592885e-27	1.1834678854233e-24	1849.62496484065	-0.336991485381676
TGGT1_299120:E003	TGGT1_299120	E003	0.00578632332641372	4.42837054552716e-27	1.68643630185441e-24	173.24493129737	-0.188394207158992
TGGT1_265090:E016	TGGT1_265090	E016	0.0285812962364389	4.55390935335044e-27	1.72610268376877e-24	34.8159357549213	2.24641391196041
TGGT1_321540:E003	TGGT1_321540	E003	0.0101488833230897	4.94353685762671e-27	1.865030131778e-24	98.3819856568695	1.17790629013318
TGGT1_208760:E003	TGGT1_208760	E003	0.00987144324154797	5.0384670955352e-27	1.89200298120016e-24	101.162029851471	-0.592068179444617
TGGT1_273130:E002	TGGT1_273130	E002	0.0233462818497753	5.3997675804753e-27	2.01828812782256e-24	42.6406645557664	1.34513396968364
TGGT1_268225:E002	TGGT1_268225	E002	0.00241392287012286	6.71880922428272e-27	2.49973761623256e-24	420.734888704924	-0.505750885737932
TGGT1_366970:E003	TGGT1_366970	E003	0.00974369905945185	7.61556528114152e-27	2.82037918794936e-24	102.495591909588	-0.92348731533628
TGGT1_308860:E006	TGGT1_308860	E006	0.00367231634754706	9.64952259586207e-27	3.55732514510011e-24	274.441621418884	0.657987099644774
TGGT1_301460:E021	TGGT1_301460	E021	0.00977103499929775	1.04950338255396e-26	3.85143889047698e-24	102.207274820593	-1.01014447798709
TGGT1_298060:E069	TGGT1_298060	E069	0.0272028656080498	1.08808593963547e-26	3.97496010572261e-24	100.54572410707	1.91262831817745
TGGT1_215740:E019	TGGT1_215740	E019	0.0136583122095216	1.22062215843486e-26	4.4390508991549e-24	73.0043938573365	1.54642329780582
TGGT1_290040:E004	TGGT1_290040	E004	0.00182956732647146	1.25716981737457e-26	4.55146211684914e-24	559.141484925054	-0.288208143581133
TGGT1_269430:E025	TGGT1_269430	E025	0.00775771814310425	1.49565115103833e-26	5.36672869684799e-24	128.915765622526	1.49902755220914
TGGT1_286932:E064	TGGT1_286932	E064	0.00363397562659132	1.49255915583348e-26	5.36672869684799e-24	555.734965357409	-0.427044541866414
TGGT1_239330:E004	TGGT1_239330	E004	0.0269756943151135	1.72737439976529e-26	6.17077752942701e-24	281.045629425532	1.60097243546419
TGGT1_290710:E001	TGGT1_290710	E001	0.00204836938097052	1.8258653437597e-26	6.49388715984315e-24	497.822241871024	-0.423229799724733
TGGT1_315690:E003	TGGT1_315690	E003	0.0134020564802643	1.87378180548519e-26	6.63507780990558e-24	74.4058484610693	1.68924959046351
TGGT1_286440:E005	TGGT1_286440	E005	0.0194318050187138	2.05255194166229e-26	7.23636598297401e-24	51.2540827886496	1.95735590894457
TGGT1_236950:E004	TGGT1_236950	E004	0.00507189378747863	2.36435896904602e-26	8.29941397243176e-24	250.584678595645	0.778455556930719
TGGT1_239820:E014	TGGT1_239820	E014	0.00195977994854831	3.16907591920792e-26	1.10759889323486e-23	712.426918803999	-0.470981675261561
TGGT1_257100:E003	TGGT1_257100	E003	0.00446050937076365	3.80404173783645e-26	1.31810862534002e-23	6098.25035082157	-0.27756446569528
TGGT1_269425:E002	TGGT1_269425	E002	0.00173342303566209	3.79339861691797e-26	1.31810862534002e-23	591.136503919451	-0.318332448904526
TGGT1_299080:E010	TGGT1_299080	E010	0.0111581625760436	7.52337268883761e-26	2.59572433347566e-23	89.4404842486295	1.3380558442821
TGGT1_275320:E024	TGGT1_275320	E024	0.00325851603311451	1.11774369137205e-25	3.84004412437966e-23	309.871697218978	-0.60796372701106
TGGT1_214620:E033	TGGT1_214620	E033	0.0157311516323853	1.29137481820127e-25	4.41776042150337e-23	63.3522057430407	1.49054494682056
TGGT1_236050:E005	TGGT1_236050	E005	0.00216010859236324	1.2984403790693e-25	4.42318919848777e-23	471.420202974736	-0.298262765421054
TGGT1_264260:E006	TGGT1_264260	E006	0.00344612514292654	1.37838736852562e-25	4.67580269739143e-23	292.737507097263	-0.445052113867475
TGGT1_242000:E017	TGGT1_242000	E017	0.0369510267912857	1.98223293475121e-25	6.69604920448279e-23	26.9184482434838	3.33557725281633
TGGT1_218790:E020	TGGT1_218790	E020	0.0152482584559767	2.04064749633075e-25	6.83616911270802e-23	65.3655168348444	1.4459635603086
TGGT1_250840:E028	TGGT1_250840	E028	0.0143249633234437	2.03741554246094e-25	6.83616911270802e-23	69.5942676271013	1.37713297562262
TGGT1_225060:E008	TGGT1_225060	E008	0.0129157893437347	2.20587956282539e-25	7.35916059936808e-23	77.2187473593639	1.46869201798488
TGGT1_299810:E004	TGGT1_299810	E004	0.0161461477015298	2.22825661468407e-25	7.40322213113243e-23	61.7185123575672	1.61544545070918
TGGT1_206610:E003	TGGT1_206610	E003	0.0125675066695824	2.62080119623443e-25	8.67173707286829e-23	79.3678065561674	1.51865878332426
TGGT1_269438:E007	TGGT1_269438	E007	0.00204522963566413	2.75118848421807e-25	9.06600825605492e-23	498.606892580349	-0.387213298207286
TGGT1_269438:E001	TGGT1_269438	E001	0.00986926146315049	2.83235397914651e-25	9.29553245960948e-23	101.18451478477	1.1899322240812
TGGT1_269430:E041	TGGT1_269430	E041	0.00662603622018995	3.07244738735356e-25	1.00426736768417e-22	151.111966465392	1.22995666643118
TGGT1_290640:E002	TGGT1_290640	E002	0.007772816646606	3.3662857219435e-25	1.09587531355286e-22	128.663623680946	1.04399019003607
TGGT1_226290:E009	TGGT1_226290	E009	0.00410880401175132	3.59555919242938e-25	1.16114988560314e-22	964.691272744313	0.488251720335086
TGGT1_243545:E005	TGGT1_243545	E005	0.00548520102510601	3.58288596870553e-25	1.16114988560314e-22	182.848770502968	0.776916664838313
TGGT1_227360:E001	TGGT1_227360	E001	0.00877045119325228	3.9911463234211e-25	1.28376573076256e-22	664.039714709458	0.863431389041556
TGGT1_231850:E011	TGGT1_231850	E011	0.00649869954429511	4.30738362753911e-25	1.37998657606893e-22	194.922372881081	0.841605677088626
TGGT1_294390:E010	TGGT1_294390	E010	0.00873030656683512	5.12244677237276e-25	1.63462743149215e-22	114.46599379788	0.918391340721284
TGGT1_249270:E014	TGGT1_249270	E014	0.00886387496619612	5.92836681542082e-25	1.88435706631102e-22	112.730704833379	1.0250850935131
TGGT1_293410:E002	TGGT1_293410	E002	0.0100346731171994	6.22166287198968e-25	1.96982726262779e-22	99.507695712223	0.912660242168792
TGGT1_225080:E003	TGGT1_225080	E003	0.0179488875257425	7.61453872480079e-25	2.40140540604216e-22	259.279026870124	1.27996621876721
TGGT1_315690:E007	TGGT1_315690	E007	0.0134392674320436	1.18832475790457e-24	3.7330505575652e-22	74.1990128293955	1.57710713373085
TGGT1_226500:E006	TGGT1_226500	E006	0.00397439423442579	1.30999308929236e-24	4.09931364589221e-22	253.299317633469	0.65123667749153
TGGT1_225105:E001	TGGT1_225105	E001	0.00413404685589281	1.32895080344952e-24	4.14258081530877e-22	243.389595864164	0.979203561684401
TGGT1_236050:E001	TGGT1_236050	E001	0.00938338267223912	1.71057775564661e-24	5.31167288854343e-22	106.453810663638	0.944209397720835
TGGT1_219530:E012	TGGT1_219530	E012	0.0150206906872	1.77079465250811e-24	5.47759027855335e-22	66.3593441143804	2.2447665820264
TGGT1_250840:E026	TGGT1_250840	E026	0.0178551039119335	2.43226945500382e-24	7.49501047518067e-22	55.7936220036994	1.55119054991304
TGGT1_203300:E013	TGGT1_203300	E013	0.00840052267593837	2.82660194593132e-24	8.66411669146437e-22	388.281747091859	-0.858721170068447
TGGT1_266870:E008	TGGT1_266870	E008	0.0028342203131211	2.83312913426221e-24	8.66411669146437e-22	357.148584246979	-0.456470988897969
TGGT1_202740:E005	TGGT1_202740	E005	0.0218086242586527	3.36270378712648e-24	1.02448260473078e-21	45.6544779600547	2.10236318270429
TGGT1_286070:E003	TGGT1_286070	E003	0.00805469088852423	3.47731030944568e-24	1.05541596929736e-21	124.131089227952	0.763271997815443
TGGT1_235680:E032	TGGT1_235680	E032	0.00199662348565276	3.65591288337752e-24	1.10546863909919e-21	511.077442091398	-0.444596014166043
TGGT1_244390:E001	TGGT1_244390	E001	0.0129714316312272	3.75155777031822e-24	1.13015677830836e-21	76.8861451017647	-1.29556618541965
TGGT1_217020:E031	TGGT1_217020	E031	0.00213590269758607	3.92505668125639e-24	1.17802769948414e-21	476.899254095939	-0.555620162479455
TGGT1_298840:E003	TGGT1_298840	E003	0.00758874674570527	4.15922041166029e-24	1.24368392568664e-21	131.806481260389	0.908780386791846
TGGT1_310390:E003	TGGT1_310390	E003	0.00282942583794221	4.19638475591564e-24	1.25016650652712e-21	357.765374769342	-0.531790198004865
TGGT1_314090:E007	TGGT1_314090	E007	0.0160948168987944	4.39167577338496e-24	1.30353655722145e-21	61.9160026684735	1.54628094868954
TGGT1_306350:E004	TGGT1_306350	E004	0.00213358585895857	4.78429094788571e-24	1.41487080467968e-21	495.213798594021	-0.102110135239465
TGGT1_200350:E009	TGGT1_200350	E009	0.00170705222388618	5.69320456051669e-24	1.67752142406319e-21	954.852352614717	-0.372094533387579
TGGT1_260450:E002	TGGT1_260450	E002	0.0165561112984444	6.47910753324804e-24	1.90214816980647e-21	60.1853060564472	1.55032160555487
TGGT1_213920:E021	TGGT1_213920	E021	0.0175827795555318	7.73106795043562e-24	2.26147743108123e-21	56.660384145614	1.51847198134095
TGGT1_209040:E007	TGGT1_209040	E007	0.0101860681627491	8.06201770412303e-24	2.34977256080279e-21	132.200104574481	0.957275820669794
TGGT1_239910:E008	TGGT1_239910	E008	0.0285913779775221	8.17669556219928e-24	2.37462415904374e-21	34.8036362505592	1.40641598937025
TGGT1_218780:E008	TGGT1_218780	E008	0.00291360067408628	9.25311859795203e-24	2.6776004659701e-21	347.23712650293	-0.563242305037868
TGGT1_207480:E069	TGGT1_207480	E069	0.0184808231153146	1.14607413267365e-23	3.3045819679074e-21	53.899119903172	2.24948234838914
TGGT1_235920:E055	TGGT1_235920	E055	0.0112079845521904	1.15874374776647e-23	3.32922336213259e-21	89.0410047271	-1.13445640981233
TGGT1_243960:E028	TGGT1_243960	E028	0.0296125570945887	1.38382534113373e-23	3.9618134367529e-21	33.6012837956694	2.87255172490479
TGGT1_234610:E027	TGGT1_234610	E027	0.00246313494103566	1.43564013700121e-23	4.09563273713047e-21	412.143216451412	0.470986767773135
TGGT1_299810:E003	TGGT1_299810	E003	0.0176031342980852	2.2949121358476e-23	6.52393420026957e-21	65.077476541972	1.52836852097621
TGGT1_306060:E007	TGGT1_306060	E007	0.0125421756161452	2.63622834201051e-23	7.4679261470954e-21	79.5287863481708	1.17669793848598
TGGT1_291950:E023	TGGT1_291950	E023	0.0053542486519774	3.23651224994541e-23	9.11262881202314e-21	906.104431681906	0.579807912829586
TGGT1_292975:E040	TGGT1_292975	E040	0.00610314810740043	3.2393936570888e-23	9.11262881202314e-21	164.172385543365	-0.780683449742092
TGGT1_212290:E007	TGGT1_212290	E007	0.0115002368880784	4.27830590701547e-23	1.19933690070449e-20	86.7677109606022	1.18569932413323
TGGT1_266910:E005	TGGT1_266910	E005	0.00467913167202942	4.41286098852571e-23	1.23277623497793e-20	220.948268021357	-0.625037897511309
TGGT1_240280:E015	TGGT1_240280	E015	0.0102564378181495	4.53934295932311e-23	1.2637374269688e-20	97.3449186597674	1.0970334875474
TGGT1_304700:E034	TGGT1_304700	E034	0.0108725777174844	4.93607410046329e-23	1.36946371993438e-20	91.8013303229216	1.56547262637036
TGGT1_262620:E005	TGGT1_262620	E005	0.00162272097728084	5.32995283955231e-23	1.47367720034677e-20	632.831192076185	0.387698672502692
TGGT1_250940:E025	TGGT1_250940	E025	0.00441719702854493	5.51001993475512e-23	1.51826436666367e-20	227.597638263881	0.746100669140536
TGGT1_259670:E012	TGGT1_259670	E012	0.0171789513012594	5.53736654554492e-23	1.52060982331486e-20	73.1984056740729	1.58269235192313
TGGT1_231960:E001	TGGT1_231960	E001	0.0310146397002503	5.64272861731448e-23	1.54429049125045e-20	32.0796556001483	2.12545966679033
TGGT1_267120:E003	TGGT1_267120	E003	0.00444415048839741	7.33095428807454e-23	1.99954254880979e-20	226.2005453259	-0.579657372196668
TGGT1_310040:E007	TGGT1_310040	E007	0.00890497289125728	7.42659946265326e-23	2.01880978995728e-20	112.207306142462	0.936797604624011
TGGT1_257550:E001	TGGT1_257550	E001	0.0420536969644913	8.50508434095612e-23	2.30422142371507e-20	26.697677033813	2.88993765522958
TGGT1_239910:E015	TGGT1_239910	E015	0.0110048339823519	8.78400155038038e-23	2.37182730826074e-20	2277.29042472848	-0.667930931443
TGGT1_224830:E002	TGGT1_224830	E002	0.00891143334236484	9.00034617834373e-23	2.42214316236194e-20	228.453538657914	-0.79210256611292
TGGT1_217020:E022	TGGT1_217020	E022	0.00551299129525624	9.91068750524246e-23	2.65827028483638e-20	1499.86156288379	-0.575447003939022
TGGT1_214620:E010	TGGT1_214620	E010	0.0307527925251793	1.06425555014786e-22	2.84512158414528e-20	32.353273939546	2.29783503022733
TGGT1_285980A:E011	TGGT1_285980A	E011	0.0110072814929635	1.31527636274574e-22	3.50458208403556e-20	122.823654485943	1.00008487956314
TGGT1_222410:E009	TGGT1_222410	E009	0.0164345576953634	1.59058722265687e-22	4.22421248096061e-20	60.6318958940095	2.2697201671933
TGGT1_238230:E004	TGGT1_238230	E004	0.00409281317862394	1.77708390688137e-22	4.70402849908418e-20	245.873964273903	0.658370397630226
TGGT1_201790:E013	TGGT1_201790	E013	0.00882742533923937	1.82458489406894e-22	4.8139823994332e-20	169.597859899622	0.871436391756655
TGGT1_268590:E003	TGGT1_268590	E003	0.0196419150150947	1.87660567737448e-22	4.93510616817031e-20	50.7043272869566	1.58458632360838
TGGT1_289340:E009	TGGT1_289340	E009	0.0431999474964828	1.93193354775882e-22	5.06411217462041e-20	49.8516106397296	1.96317683997039
TGGT1_237240:E018	TGGT1_237240	E018	0.014335818603968	2.07467348965422e-22	5.42067198016938e-20	115.47545054021	1.21181780022144
TGGT1_221470:E012	TGGT1_221470	E012	0.00839501119054079	2.78560020679478e-22	7.25469137727665e-20	119.066912040825	0.964749766301025
TGGT1_262590:E001	TGGT1_262590	E001	0.00738054937950107	2.95586427110143e-22	7.67336662145897e-20	135.551603828293	0.797617343173194
TGGT1_224460:E003	TGGT1_224460	E003	0.0142998464025719	3.25588697616415e-22	8.42512932758373e-20	116.895085179984	1.1047778112168
TGGT1_317720:E013	TGGT1_317720	E013	0.00540603796087839	4.54668642201093e-22	1.17276909993947e-19	185.552927040098	-0.721626825489775
TGGT1_231175:E003	TGGT1_231175	E003	0.0380108257707081	4.69253431029447e-22	1.2065342596867e-19	26.1668692052097	1.84452394213407
TGGT1_305990:E018	TGGT1_305990	E018	0.00277046390742147	5.16969718050033e-22	1.32500159323077e-19	365.528573620432	-0.466300217965779
TGGT1_231850:E010	TGGT1_231850	E010	0.00550531154775545	5.18841588669111e-22	1.32559100193673e-19	182.174317131367	0.742322183006361
TGGT1_261650:E026	TGGT1_261650	E026	0.00705115720654847	5.22045136366226e-22	1.3295682676507e-19	150.428130880219	0.784477512512393
TGGT1_210440:E002	TGGT1_210440	E002	0.0254712266192915	6.06821131245873e-22	1.54061962362062e-19	39.075906563501	2.26250286474894
TGGT1_293540:E002	TGGT1_293540	E002	0.018248582868258	6.28990120937541e-22	1.59189709761418e-19	54.5870722206278	1.34542584680554
TGGT1_318650:E007	TGGT1_318650	E007	0.000481514382090926	7.11803824394565e-22	1.79585880507798e-19	2319.0174348179	-0.119817688034647
TGGT1_206415:E015	TGGT1_206415	E015	0.0412499115358584	8.46652475972472e-22	2.12678678769491e-19	24.1095019308592	2.9728939263493
TGGT1_269438:E005	TGGT1_269438	E005	0.00166154082608745	8.4823849091195e-22	2.12678678769491e-19	617.556660359901	-0.304541545208904
TGGT1_278950:E011	TGGT1_278950	E011	0.0189163923186777	8.8102594706504e-22	2.20215572248595e-19	52.654536482689	1.309925734515
TGGT1_263980:E014	TGGT1_263980	E014	0.0152459321714995	9.72720664654416e-22	2.42384576731094e-19	65.3755254984515	1.49203997156725
TGGT1_214620:E002	TGGT1_214620	E002	0.0388344688292477	1.08980325811211e-21	2.7072389551902e-19	25.6111326439444	2.93593384376898
TGGT1_270540:E014	TGGT1_270540	E014	0.00242461923261129	1.22489597814104e-21	3.03349622071219e-19	418.837137832181	-0.373068443348438
TGGT1_250220:E043	TGGT1_250220	E043	0.0379179223530268	1.23317873320886e-21	3.04466926683846e-19	26.2310712498647	2.62025499448756
TGGT1_319580:E030	TGGT1_319580	E030	0.0330322628954217	1.24414337894447e-21	3.06237547863055e-19	30.1170562230576	2.54671113431083
TGGT1_270530:E023	TGGT1_270530	E023	0.0188603408667018	1.33227440659283e-21	3.26933660231831e-19	52.8114644138251	1.51553406344686
TGGT1_311335:E026	TGGT1_311335	E026	0.00213485324548724	1.34437919371759e-21	3.28904406681181e-19	477.139681616547	-0.458230412445346
TGGT1_232660:E002	TGGT1_232660	E002	0.0118340110986026	1.45407589934833e-21	3.54667123063105e-19	84.3094028787508	1.1332897149227
TGGT1_321630:E002	TGGT1_321630	E002	0.00718105693241019	1.49472839763533e-21	3.63484630069543e-19	139.345392264078	0.811908972532593
TGGT1_244710:E003	TGGT1_244710	E003	0.00202793277703648	1.5053709295097e-21	3.64973339321217e-19	502.974269350498	-0.295132431518107
TGGT1_222410:E010	TGGT1_222410	E010	0.0177382894986599	1.69136974179188e-21	4.08840527256189e-19	56.1621530791176	2.37626481656025
TGGT1_215425:E002	TGGT1_215425	E002	0.00365702388609452	1.70879912666328e-21	4.11820589525851e-19	275.606191742449	-0.479806687842775
TGGT1_227995:E003	TGGT1_227995	E003	0.0149847975185245	1.77635191506478e-21	4.26826701972485e-19	66.5188615172131	-0.400930054068132
TGGT1_269430:E013	TGGT1_269430	E013	0.0104415902244197	2.09382793590624e-21	5.01617799422523e-19	95.6099363381931	-1.041813269713
TGGT1_204330:E009	TGGT1_204330	E009	0.0200834841624857	2.5057686056425e-21	5.98530261469075e-19	49.5865456279681	1.61366396857159
TGGT1_262680:E006	TGGT1_262680	E006	0.00214029074879559	2.64848400833275e-21	6.30753263754408e-19	475.896578855248	-0.226974210157178
TGGT1_214620:E020	TGGT1_214620	E020	0.0177499365313362	2.88167076881778e-21	6.84269675060305e-19	56.125190161352	1.42258892218064
TGGT1_290670:E016	TGGT1_290670	E016	0.0117170564731332	2.97641705907119e-21	7.04695106346371e-19	85.1547826243301	1.08745787108144
TGGT1_248880:E002	TGGT1_248880	E002	0.0169055472338247	3.22789029267946e-21	7.61999189413674e-19	58.9373535796485	1.40951367342155
TGGT1_290670:E014	TGGT1_290670	E014	0.0127889075547695	3.76248590478689e-21	8.85610202690874e-19	77.9880540461658	1.1442667621783
TGGT1_310100:E019	TGGT1_310100	E019	0.0192394796261865	3.77826980065829e-21	8.86740152198102e-19	51.7678598165554	1.66453906245061
TGGT1_309600:E012	TGGT1_309600	E012	0.023586191252584	4.00384803684506e-21	9.36958467404887e-19	78.52964591558	1.40583830594222
TGGT1_263630:E003	TGGT1_263630	E003	0.00673095983269106	5.9046240499864e-21	1.37777405397587e-18	148.737629653128	0.757816684841177
TGGT1_304700:E037	TGGT1_304700	E037	0.0115881820512128	6.47807390659528e-21	1.50722563933421e-18	86.1061745202324	1.5175390674074
TGGT1_273130:E003	TGGT1_273130	E003	0.0288402997686219	7.24105413050963e-21	1.67990375065142e-18	34.5026893574982	1.24982497003619
TGGT1_223060:E001	TGGT1_223060	E001	0.0127405114754845	7.40320488426986e-21	1.71260099235395e-18	78.2855418758585	1.52973351687441
TGGT1_299080:E012	TGGT1_299080	E012	0.0144152676049216	8.46892339554351e-21	1.95353865811201e-18	69.1566797092625	1.36515050834586
TGGT1_222840:E026	TGGT1_222840	E026	0.0115282374042091	9.1630729517334e-21	2.10763730700341e-18	86.5559866798075	1.08862234262337
TGGT1_287160:E009	TGGT1_287160	E009	0.0100646482842391	9.6921305581372e-21	2.22299477446366e-18	105.722665555802	0.999629634612855
TGGT1_285470:E005	TGGT1_285470	E005	0.000539715617828738	1.14360874423179e-20	2.61555954576639e-18	2041.5873450851	-0.138961206489239
TGGT1_265090:E015	TGGT1_265090	E015	0.0293335658119083	1.38346837829103e-20	3.15520676613915e-18	33.9214461322175	1.83582493728219
TGGT1_229030:E002	TGGT1_229030	E002	0.00615197030683709	1.40769294109025e-20	3.20141097461749e-18	337.915409412281	-0.671666794624012
TGGT1_285210:E007	TGGT1_285210	E007	0.0179773707208771	1.42979444725365e-20	3.24254086233211e-18	55.4130345694528	1.70878305515022
TGGT1_204070:E010	TGGT1_204070	E010	0.0112747371263605	1.43625803422717e-20	3.24807541718012e-18	88.5113335609469	1.00073947292469
TGGT1_225060:E012	TGGT1_225060	E012	0.0156424147224168	1.5470858999009e-20	3.48893799241619e-18	63.7128194612522	1.44975052828607
TGGT1_298060:E067	TGGT1_298060	E067	0.0223776623111707	1.62620242194102e-20	3.65714352466319e-18	44.4907700380482	1.85672950809505
TGGT1_318650:E010	TGGT1_318650	E010	0.00404406575413126	1.67596265421463e-20	3.75857902466718e-18	248.877265006678	0.574062995099133
TGGT1_311335:E022	TGGT1_311335	E022	0.00220810142167422	1.92689712716963e-20	4.30936397678782e-18	460.920903429841	-0.451863285168349
TGGT1_233230:E007	TGGT1_233230	E007	0.00951364447797827	2.07048450447476e-20	4.61769520631962e-18	104.988035050544	0.907617802050456
TGGT1_298840:E008	TGGT1_298840	E008	0.000815282341688957	2.17691262857819e-20	4.84168157212839e-18	1303.3400583946	-0.177949985470519
TGGT1_269430:E002	TGGT1_269430	E002	0.00773933214489271	2.46473385305651e-20	5.46676614358565e-18	129.224145685797	-0.877076374750542
TGGT1_238230:E015	TGGT1_238230	E015	0.0266290427552405	2.56271157370078e-20	5.6606077447318e-18	37.3735055330618	-1.60628523520899
TGGT1_313380:E002	TGGT1_313380	E002	0.00448546012890103	2.56615152606904e-20	5.6606077447318e-18	224.09229889941	0.649470210115803
TGGT1_222000:E002	TGGT1_222000	E002	0.0165073535499967	2.67671223565975e-20	5.88840224375995e-18	60.3636502554865	-1.24729476331803
TGGT1_208410:E026	TGGT1_208410	E026	0.0104322215081658	3.17676608828325e-20	6.96946223199859e-18	95.6962396308393	0.964120602112513
TGGT1_254440:E008	TGGT1_254440	E008	0.0129694030288223	3.473368817167e-20	7.59952388764167e-18	429.744629205472	0.938078928646759
TGGT1_269430:E003	TGGT1_269430	E003	0.00449152842281482	4.55687929352571e-20	9.94323377737292e-18	223.785908147423	-0.676298809681041
TGGT1_208010:E008	TGGT1_208010	E008	0.0051577647302107	4.9331686550255e-20	1.07352930286653e-17	194.577784189432	0.652350351362725
TGGT1_235920:E056	TGGT1_235920	E056	0.00900961350667902	4.97637604237116e-20	1.08002075209902e-17	110.896350332935	-0.899608055209409
TGGT1_245752:E008	TGGT1_245752	E008	0.00703233052688693	5.48004850367797e-20	1.18614401057491e-17	142.314871948996	1.2635348307729
TGGT1_306430:E008	TGGT1_306430	E008	0.0311132707984313	6.02192799745624e-20	1.29994747827441e-17	31.9777867636603	2.51712026005366
TGGT1_225060:E021	TGGT1_225060	E021	0.0136054583442036	6.46135883745651e-20	1.3910874819788e-17	73.289111637135	1.24582718955782
TGGT1_221980:E003	TGGT1_221980	E003	0.00319266961565724	6.93659943220541e-20	1.48943179563591e-17	316.370898198512	-0.369157381285581
TGGT1_223140:E006	TGGT1_223140	E006	0.0143883913097518	7.13869061385734e-20	1.52875911594104e-17	69.2863380688112	1.36563297553948
TGGT1_311250:E002	TGGT1_311250	E002	0.0463385248984499	7.91372254878474e-20	1.69024970893158e-17	21.4588999114686	14.7723405751917
TGGT1_229030:E001	TGGT1_229030	E001	0.00504855736778589	8.07129773688388e-20	1.71935678835705e-17	268.771985556586	-0.640630229921557
TGGT1_282055:E041	TGGT1_282055	E041	0.0703456259184975	8.21372406877316e-20	1.74509213866421e-17	14.1300008555254	16.309048501464
TGGT1_294250:E018	TGGT1_294250	E018	0.0229204108685468	8.80368559176098e-20	1.86552639435912e-17	43.4347900102543	1.84753565768964
TGGT1_239910:E001	TGGT1_239910	E001	0.00469411734716334	9.52404301286974e-20	2.01288903833518e-17	214.016998760586	0.107846844988869
TGGT1_203280:E008	TGGT1_203280	E008	0.0118419902117516	9.94297780408313e-20	2.09594337601215e-17	84.2523389089788	0.987365966750999
TGGT1_268250:E001	TGGT1_268250	E001	0.00475824087029161	1.01598109366122e-19	2.13607379158173e-17	211.100218542433	-0.519077170240382
TGGT1_268250:E004	TGGT1_268250	E004	0.0121511253151489	1.07127942977887e-19	2.24648687696616e-17	82.0994582375436	1.05673840892934
TGGT1_282055:E039	TGGT1_282055	E039	0.0701945191911626	1.16283054584143e-19	2.43215347457274e-17	14.1604413817793	16.3107673380596
TGGT1_247370:E003	TGGT1_247370	E003	0.0561950771240599	1.25237655558946e-19	2.61267755078849e-17	17.6914657224706	3.69469749623221
TGGT1_225060:E004	TGGT1_225060	E004	0.0147772336683258	1.43836720130052e-19	2.99295298961333e-17	67.4565750650291	1.30758708994161
TGGT1_313418:E003	TGGT1_313418	E003	0.00197117025217827	1.46116079138904e-19	3.03256597667851e-17	517.859966895806	-0.132030311294407
TGGT1_240810:E003	TGGT1_240810	E003	0.00166779855161888	1.49950056730019e-19	3.10415841797386e-17	615.163162632211	0.398344385042242
TGGT1_239820:E004	TGGT1_239820	E004	0.00416209968366631	1.52792273890622e-19	3.15490645334e-17	241.727887562313	0.584657367314555
TGGT1_233925:E005	TGGT1_233925	E005	0.00938322375266595	1.63035439130026e-19	3.35782300463334e-17	132.821635431194	0.809170041167849
TGGT1_262700:E008	TGGT1_262700	E008	0.0148547021017573	1.7580348782374e-19	3.61157623141212e-17	67.1035189530804	1.36150764966425
TGGT1_258080:E007	TGGT1_258080	E007	0.0213030368101199	1.80115429222363e-19	3.69076628890038e-17	46.7407144532995	1.75708203591855
TGGT1_318410:E021	TGGT1_318410	E021	0.0256013571549629	1.93270388540181e-19	3.95029995412443e-17	38.876871784891	1.85120374418518
TGGT1_236070:E006	TGGT1_236070	E006	0.00909388456849363	1.95813392170115e-19	3.99217025678138e-17	175.172816568338	0.753657523638878
TGGT1_266640:E032	TGGT1_266640	E032	0.00652922566263541	2.00247999395803e-19	4.07229779123933e-17	153.370955271736	-0.781688513067368
TGGT1_206550:E032	TGGT1_206550	E032	0.00484779611687452	2.06580726795429e-19	4.19052637633893e-17	207.157197258936	0.982300487670727
TGGT1_224350A:E004	TGGT1_224350A	E004	0.0108953116571527	2.12217756172602e-19	4.29408534952255e-17	127.691081360411	0.952881818085398
TGGT1_250220:E039	TGGT1_250220	E039	0.0197771572317001	2.1989929780587e-19	4.43839245208923e-17	50.3566601816176	1.38693039160963
TGGT1_301180:E001	TGGT1_301180	E001	0.0257117272986629	2.33877105468386e-19	4.70874516458608e-17	38.7096428351377	2.63419874281631
TGGT1_269430:E024	TGGT1_269430	E024	0.0119947879176979	3.84100882835337e-19	7.71402606360968e-17	83.1742929022232	1.64965576614545
TGGT1_277270:E005	TGGT1_277270	E005	0.0122084240019204	4.14998907902353e-19	8.31388010657481e-17	190.023883430485	0.897274081605643
TGGT1_206400:E005	TGGT1_206400	E005	0.00274042487431534	4.2741073565218e-19	8.541338055168e-17	369.614643864368	-0.918651079070043
TGGT1_265520:E021	TGGT1_265520	E021	0.0110343111185078	4.51902836885881e-19	9.00848778666211e-17	90.4492483148397	1.01757971682503
TGGT1_280740:E011	TGGT1_280740	E011	0.0414222921414885	4.82320148624405e-19	9.59116187172201e-17	24.0090401629249	3.04782928885019
TGGT1_258080:E009	TGGT1_258080	E009	0.0110981546962469	5.04969255692224e-19	1.0016877852165e-16	89.9264202860923	1.03312603023724
TGGT1_207430:E003	TGGT1_207430	E003	0.0255848711011024	5.46947510155905e-19	1.08229919687346e-16	38.9019749830703	1.70159934841374
TGGT1_268250:E006	TGGT1_268250	E006	0.00920241248080936	6.2636483235135e-19	1.23641967579184e-16	108.559456353075	0.846000255088281
TGGT1_266870:E001	TGGT1_266870	E001	0.015029095399518	6.36350820433505e-19	1.25306788994388e-16	66.3221021484426	1.22634500859764
TGGT1_201790:E001	TGGT1_201790	E001	0.00208905661729473	6.90140682062488e-19	1.35568145903443e-16	607.115501953002	-0.312629833591051
TGGT1_251680:E004	TGGT1_251680	E004	0.0100303830707866	7.09184150222014e-19	1.38970830990714e-16	99.5504826699479	0.964338741424571
TGGT1_203135:E021	TGGT1_203135	E021	0.0231767123264891	7.60392661225948e-19	1.48285752425306e-16	42.9533576280158	-1.10003423081882
TGGT1_266010:E054	TGGT1_266010	E054	0.0569444717331853	7.58754041817021e-19	1.48285752425306e-16	17.4584265879155	16.4530026129153
TGGT1_230980:E014	TGGT1_230980	E014	0.043338239665294	7.74156840277843e-19	1.50606150602004e-16	22.9463155304563	2.67724742196446
TGGT1_282055:E043	TGGT1_282055	E043	0.0746072781992268	7.94196028396331e-19	1.54133212386004e-16	13.3223030794786	16.248178661454
TGGT1_232250:E003	TGGT1_232250	E003	0.0129736619955065	8.06003955255308e-19	1.56049710617595e-16	76.8728727960418	1.08298786635121
TGGT1_269430:E019	TGGT1_269430	E019	0.0106728738292184	9.25800508398509e-19	1.78814602979793e-16	93.5276648820021	1.43374942991931
TGGT1_305990:E022	TGGT1_305990	E022	0.00274034196679111	1.06801901738778e-18	2.05791206130794e-16	369.626047808007	-0.420050697743158
TGGT1_230980:E019	TGGT1_230980	E019	0.0133646208787458	1.07383597987026e-18	2.06419399606727e-16	74.6150996770735	1.08592322960109
TGGT1_292975:E044	TGGT1_292975	E044	0.00205265006696362	1.14358292056955e-18	2.19304434898295e-16	496.756430024809	0.385224936589011
TGGT1_261022:E020	TGGT1_261022	E020	0.016261396833372	1.19833225897349e-18	2.29259134901007e-16	80.4371829862804	1.18204110535877
TGGT1_287160:E008	TGGT1_287160	E008	0.0126042761070587	1.22781788966361e-18	2.3434486364537e-16	79.1352915705114	1.06723199088718
TGGT1_264260:E005	TGGT1_264260	E005	0.0073935406667328	1.39835794153482e-18	2.65638655081915e-16	135.311697576363	-0.693161616375749
TGGT1_312905:E024	TGGT1_312905	E024	0.000836839477477513	1.39833514557174e-18	2.65638655081915e-16	1267.48575687004	-0.213892827369602
TGGT1_225005:E008	TGGT1_225005	E008	0.0195875130218701	1.40933731960501e-18	2.67095888493686e-16	132.603910861692	-0.616951946913167
TGGT1_223060:E002	TGGT1_223060	E002	0.0177800223820686	1.41814486755654e-18	2.68135657803694e-16	125.098895062211	1.33910890447488
TGGT1_306430:E018	TGGT1_306430	E018	0.0268218293656327	1.44201861979879e-18	2.72012554367885e-16	37.1043428646253	1.94952298694649
TGGT1_223920:E016	TGGT1_223920	E016	0.0288934354640002	1.59153561592356e-18	2.99516615271768e-16	34.4391210346991	1.75131463468319
TGGT1_305990:E025	TGGT1_305990	E025	0.00178177609353662	1.66448645845417e-18	3.12517009821621e-16	583.945573402105	-0.320544945412011
TGGT1_260830:E001	TGGT1_260830	E001	0.0103202287040893	1.76491763614406e-18	3.30604699197427e-16	964.206603970845	-0.555489330091695
TGGT1_312065:E017	TGGT1_312065	E017	0.0157271287231397	1.81565072152358e-18	3.39320743060662e-16	71.7425117630917	1.46817107540461
TGGT1_290670:E018	TGGT1_290670	E018	0.013440806085754	1.82001070442517e-18	3.39350032844726e-16	74.1904850372987	1.07721464159602
TGGT1_260270:E010	TGGT1_260270	E010	0.0212638002829666	1.84514726316652e-18	3.43244157354261e-16	46.8271780448941	1.74710523241382
TGGT1_244840:E005	TGGT1_244840	E005	0.0171320884820843	2.00657961271743e-18	3.72416563293659e-16	58.1555840847105	1.30492950073362
TGGT1_297470:E017	TGGT1_297470	E017	0.0226900675844623	2.02594852456654e-18	3.75148977364403e-16	43.8767645516804	1.55160495066765
TGGT1_315270:E014	TGGT1_315270	E014	0.0228465714590774	2.28470014024245e-18	4.22094429799711e-16	43.5754976487725	1.78681392008784
TGGT1_266870:E002	TGGT1_266870	E002	0.0165545534970681	2.41221929494765e-18	4.44635901318718e-16	60.1909878232521	1.29673450948298
TGGT1_258080:E004	TGGT1_258080	E004	0.0127001514175454	2.59645167672958e-18	4.77504615309255e-16	78.535373859542	1.10793265085437
TGGT1_270000:E041	TGGT1_270000	E041	0.0242306832647446	2.69849494861074e-18	4.95143158354746e-16	41.0808872893221	1.94247828307143
TGGT1_291340:E001	TGGT1_291340	E001	0.0224293385809222	3.00913251268759e-18	5.50889599573317e-16	44.388021359946	-1.2154251528917
TGGT1_269442:E006	TGGT1_269442	E006	0.000535698886577547	3.06946954854305e-18	5.60664307695981e-16	2058.58381271598	-0.141253422885579
TGGT1_207430:E002	TGGT1_207430	E002	0.024335466564547	3.54802614925058e-18	6.46613749796266e-16	40.9036141454255	1.58322415538871
TGGT1_260270:E014	TGGT1_260270	E014	0.0162510004191201	3.5756884199853e-18	6.50187397719624e-16	61.3189914409978	1.41861498433652
TGGT1_277270:E007	TGGT1_277270	E007	0.0157633364178212	3.71478289713602e-18	6.73961791461296e-16	63.7966842836208	1.13841698439833
TGGT1_238230:E010	TGGT1_238230	E010	0.00942858203421366	3.96806807123734e-18	7.18300394016473e-16	105.940588650138	1.08146433183525
TGGT1_231640:E004	TGGT1_231640	E004	0.00673098145930105	4.05240813086432e-18	7.31926555806109e-16	148.73714795148	0.773157513192331
TGGT1_250220:E040	TGGT1_250220	E040	0.0158122748861695	4.55992881836146e-18	8.19923949110049e-16	63.026086204733	1.15484379037658
TGGT1_260270:E006	TGGT1_260270	E006	0.0173695472678048	4.55906516558118e-18	8.19923949110049e-16	57.3580967862341	1.46053078809626
TGGT1_263660:E002	TGGT1_263660	E002	0.0123991701017322	4.80525583561677e-18	8.62116288641155e-16	80.4499832641815	0.929055724321581
TGGT1_249360:E020	TGGT1_249360	E020	0.0283571546668154	4.85325462710764e-18	8.68797144832672e-16	35.0916464442499	1.74590462001955
TGGT1_290040:E002	TGGT1_290040	E002	0.0742046718862001	5.65869644374388e-18	1.01074083492403e-15	13.5630385573015	3.42707659702388
TGGT1_238230:E011	TGGT1_238230	E011	0.00932997148809209	5.76769977221925e-18	1.02731246393778e-15	107.066721501512	1.06543314997617
TGGT1_308000:E021	TGGT1_308000	E021	0.0166890204148288	5.77692275503502e-18	1.02731246393778e-15	59.7044651205344	1.19994572539407
TGGT1_288590:E001	TGGT1_288590	E001	0.00685617243518072	5.8142138727172e-18	1.03167155387653e-15	146.000022055162	-0.155549918820072
TGGT1_206600:E002	TGGT1_206600	E002	0.018045942775529	6.06196595860553e-18	1.07327373172811e-15	55.2018500366158	1.33707228983595
TGGT1_279405:E006	TGGT1_279405	E006	0.00830525303409546	6.55801531090912e-18	1.15855878802242e-15	120.362013632255	-0.516503461869074
TGGT1_207480:E063	TGGT1_207480	E063	0.0152803599443965	6.60289798343481e-18	1.16394097967819e-15	65.2277148697707	1.39177856595312
TGGT1_217020:E028	TGGT1_217020	E028	0.00357164001633855	6.75659500141491e-18	1.18843942797219e-15	282.294505009594	-0.628055703033393
TGGT1_269430:E021	TGGT1_269430	E021	0.0135442653837124	7.0850093230039e-18	1.24349614715809e-15	73.6215377908049	1.72491997696758
TGGT1_269430:E010	TGGT1_269430	E010	0.00455812429818977	7.19632643921619e-18	1.26029374201761e-15	220.477690333988	-0.649339815219161
TGGT1_209950:E013	TGGT1_209950	E013	0.00443547621923636	7.35675005859756e-18	1.28560003459064e-15	495.771418641878	0.528635724390788
TGGT1_315780:E009	TGGT1_315780	E009	0.0204562035908487	7.52548344913723e-18	1.31224601785334e-15	48.6807043288608	1.31755951912053
TGGT1_226290:E015	TGGT1_226290	E015	0.00881657401684311	7.54793386355836e-18	1.31332422516031e-15	193.924412269314	-0.747867740298306
TGGT1_363340:E005	TGGT1_363340	E005	0.00555101312181855	7.91052474989305e-18	1.37345422727444e-15	180.659955542258	-0.566372629177836
TGGT1_279440:E001	TGGT1_279440	E001	0.00481907163383204	8.22365937189553e-18	1.42475780984975e-15	208.405762813994	-0.247056254369772
TGGT1_217020:E041	TGGT1_217020	E041	0.0100520991297442	8.70896397289851e-18	1.5056064375845e-15	99.3342741108881	0.832900339226471
TGGT1_260450:E003	TGGT1_260450	E003	0.0453952931411431	8.99410498022272e-18	1.55157919995359e-15	81.5985905045882	1.69459461203926
TGGT1_229030:E011	TGGT1_229030	E011	0.00409789788092197	9.75979496422816e-18	1.6800789902707e-15	245.564868059479	-0.568973686686007
TGGT1_275310:E001	TGGT1_275310	E001	0.00185598438157067	9.78616310215648e-18	1.68103378309065e-15	550.948047456563	-0.315486001396415
TGGT1_268280:E026	TGGT1_268280	E026	0.00557689045140556	1.06140172186084e-17	1.81936874765254e-15	179.813599170585	0.651250262247847
TGGT1_286050:E012	TGGT1_286050	E012	0.00402904387189337	1.08690617964251e-17	1.85913920367453e-15	249.817598674319	-0.475474266961621
TGGT1_230400:E025	TGGT1_230400	E025	0.0207550723505445	1.09720299004166e-17	1.87278400424975e-15	47.9779102723038	1.35207788690508
TGGT1_270090:E002	TGGT1_270090	E002	0.0157796555207755	1.13714894219179e-17	1.93687172674797e-15	95.3634694115788	1.17700654573434
TGGT1_214400:E001	TGGT1_214400	E001	0.00622172627057119	1.1673852719775e-17	1.98418631438112e-15	161.016476170805	0.599226495655223
TGGT1_289350:E023	TGGT1_289350	E023	0.0111128344594523	1.18253482980434e-17	2.0057132244591e-15	89.8070582538493	-0.973693555680489
TGGT1_314900:E025	TGGT1_314900	E025	0.0111098673440102	1.21164159075951e-17	2.05077324591131e-15	89.8311584897084	0.954524328492094
TGGT1_292290:E001	TGGT1_292290	E001	0.00239354703744064	1.33529972841576e-17	2.25534358940683e-15	424.397970092931	-0.129449583717339
TGGT1_225060:E029	TGGT1_225060	E029	0.0203070538099646	1.34208058313963e-17	2.26206421460915e-15	49.0391902805272	1.54833081915487
TGGT1_269430:E045	TGGT1_269430	E045	0.0128312163761591	1.38330870963488e-17	2.32669643067442e-15	77.7298303407693	1.59979774610343
TGGT1_301460:E004	TGGT1_301460	E004	0.0167316330156678	1.54731504899754e-17	2.59714096633714e-15	59.5519229151305	1.31079133503699
TGGT1_307820:E002	TGGT1_307820	E002	0.0361832973056963	1.56289260872056e-17	2.61784511960693e-15	27.4904393815463	2.00246628075463
TGGT1_270540:E016	TGGT1_270540	E016	0.0229256102323524	1.62766890753591e-17	2.72070081262757e-15	43.4249163926919	2.37134714212557
TGGT1_321685:E010	TGGT1_321685	E010	0.00947599495271251	1.67000213663702e-17	2.78569467978079e-15	105.407523783733	1.20467847134176
TGGT1_244200:E002	TGGT1_244200	E002	0.0279634432509765	1.69126954144237e-17	2.81535353460516e-15	35.586661464952	1.56810139740198
TGGT1_250940:E028	TGGT1_250940	E028	0.00687002539690853	2.03404644207197e-17	3.37898640947902e-15	145.703324208863	0.81953545407226
TGGT1_223060:E004	TGGT1_223060	E004	0.0174417696305783	2.10002463838892e-17	3.48142688255296e-15	57.1198632148237	1.7042370460302
TGGT1_243960:E027	TGGT1_243960	E027	0.0047808317163571	2.16626904955e-17	3.58388794498811e-15	210.091479115648	0.604232329554819
TGGT1_308040:E010	TGGT1_308040	E010	0.030416783230086	2.26310468838662e-17	3.73643674881173e-15	32.711301724172	1.99654193375724
TGGT1_269430:E001	TGGT1_269430	E001	0.013573245225676	2.31793967027794e-17	3.81916039346713e-15	73.4637318816972	-1.0572814845578
TGGT1_225990:E004	TGGT1_225990	E004	0.0332098381079937	2.43359171110794e-17	3.99341517878657e-15	29.9557598577144	1.86111487186258
TGGT1_310300:E015	TGGT1_310300	E015	0.0148469429464529	2.43045181680113e-17	3.99341517878657e-15	67.1387140476535	1.34768591958145
TGGT1_270250:E003	TGGT1_270250	E003	0.00158866173607495	2.88571348200788e-17	4.72572166267558e-15	3035.86653366569	0.281670499874027
TGGT1_207750:E022	TGGT1_207750	E022	0.0205079019473695	3.13154814784056e-17	5.11792590518031e-15	48.5576659017071	1.43317114428992
TGGT1_283510:E007	TGGT1_283510	E007	0.00658794887982558	3.4775831699816e-17	5.67197327734271e-15	151.992714439956	-0.725627568660314
TGGT1_286790:E014	TGGT1_286790	E014	0.0218840907916184	3.49986846093997e-17	5.69681210068525e-15	45.4966562890629	1.44765678291125
TGGT1_269438:E003	TGGT1_269438	E003	0.0124264181792971	3.6589473789255e-17	5.94376492228472e-15	80.272817537654	1.06104028803098
TGGT1_226950:E002	TGGT1_226950	E002	0.024243260260527	4.0743472146496e-17	6.60526952559709e-15	41.0595283311931	1.58654338717692
TGGT1_204330:E023	TGGT1_204330	E023	0.0130390174398659	4.35893627798738e-17	7.04710995505277e-15	672.366395917886	-0.761180418854584
TGGT1_289750:E002	TGGT1_289750	E002	0.0102822731053106	4.36434629036525e-17	7.04710995505277e-15	97.0990569093613	0.891463778663437
TGGT1_223060:E011	TGGT1_223060	E011	0.00994243833248174	4.49839997088811e-17	7.24906829640024e-15	105.898592818136	1.06758735155564
TGGT1_204330:E007	TGGT1_204330	E007	0.0206043345143273	4.70481683906182e-17	7.5666013446545e-15	48.3298174599846	1.28243270400345
TGGT1_271460:E015	TGGT1_271460	E015	0.0261787695190523	4.87007778170814e-17	7.81681371185302e-15	38.0176369257565	1.43054141181065
TGGT1_299080:E021	TGGT1_299080	E021	0.0111955774519533	5.19891733115485e-17	8.32806727640449e-15	89.1401525297047	0.996001701288298
TGGT1_244470:E025	TGGT1_244470	E025	0.0117436474384175	5.56095129764609e-17	8.89036441614767e-15	84.9610902146763	0.944011496867459
TGGT1_311240:E002	TGGT1_311240	E002	0.00561327760466249	5.70902969612819e-17	9.10906151219189e-15	240.198476152986	0.606046754524221
TGGT1_289570:E016	TGGT1_289570	E016	0.0197826197268508	5.7644217189161e-17	9.17930152813987e-15	50.3427178945898	1.39129302002441
TGGT1_250940:E026	TGGT1_250940	E026	0.00847556489715861	6.15126273238219e-17	9.77602749407237e-15	130.618278020905	0.893113078653609
TGGT1_219530:E013	TGGT1_219530	E013	0.0188188824732054	6.82681092635444e-17	1.08283414565663e-14	52.9281391109814	1.83279016448161
TGGT1_260270:E020	TGGT1_260270	E020	0.00449113447212357	6.91105449666479e-17	1.09404702899653e-14	223.805773453724	-0.530816753967514
TGGT1_203460:E003	TGGT1_203460	E003	0.0257448127490748	7.86750501480598e-17	1.2430196034645e-14	38.6597928405106	1.52370588409601
TGGT1_221980:E004	TGGT1_221980	E004	0.00829253431725481	7.98771523138596e-17	1.25954724454286e-14	120.547811811039	0.76243461051439
TGGT1_290650:E006	TGGT1_290650	E006	0.0090672935832012	8.11392759082925e-17	1.2769550566191e-14	214.29646576689	0.75859733932952
TGGT1_319940:E002	TGGT1_319940	E002	0.0169247347360272	8.3079997246094e-17	1.30495400343646e-14	58.870325791115	1.07119841452047
TGGT1_290670:E020	TGGT1_290670	E020	0.0127107595435137	8.90423389284641e-17	1.39588994823098e-14	78.4695543642607	0.980829153185479
TGGT1_270720:E001	TGGT1_270720	E001	0.00485554283584874	8.92424238858135e-17	1.3963153279886e-14	206.823028305434	-0.545517388064892
TGGT1_268280:E024	TGGT1_268280	E024	0.00726628121962395	9.44254940896725e-17	1.47455362965758e-14	137.698989370562	0.725758082178561
TGGT1_248880:E016	TGGT1_248880	E016	0.010278248151141	9.53704546954896e-17	1.48643506946725e-14	178.660014008653	0.811000712285004
TGGT1_257595:E001	TGGT1_257595	E001	0.00202253849014871	9.9942695476739e-17	1.55469624649605e-14	504.351995590037	-0.204168111915387
TGGT1_270000:E031	TGGT1_270000	E031	0.0226585293005354	1.16458362740089e-16	1.80812806073482e-14	43.9379801530428	1.66012844836959
TGGT1_266920:E005	TGGT1_266920	E005	0.000534474615626305	1.20209920656017e-16	1.86279231173965e-14	2063.82063005072	0.169425666988211
TGGT1_259710:E012	TGGT1_259710	E012	0.0275652785424128	1.22459391497575e-16	1.89401512884229e-14	36.1016847417569	1.48901755443721
TGGT1_266870:E007	TGGT1_266870	E007	0.00408903914425205	1.33723643217737e-16	2.06427884037936e-14	246.103889302716	-0.490227075590182
TGGT1_204330:E002	TGGT1_204330	E002	0.0220396081852612	1.34846720559176e-16	2.07764312678342e-14	45.1748426285724	1.33787785235309
TGGT1_312100:E002	TGGT1_312100	E002	0.0124279134260715	1.37312914645611e-16	2.11161107884065e-14	80.2631180948557	1.06974367651363
TGGT1_312230:E011	TGGT1_312230	E011	0.0506787632349196	1.38645709690333e-16	2.12805349274697e-14	19.6191817291598	2.34976407720044
TGGT1_318650:E012	TGGT1_318650	E012	0.0114678640194157	1.50915667389897e-16	2.31198793296458e-14	87.0137912307901	0.902546788286732
TGGT1_263320:E005	TGGT1_263320	E005	0.000600011849423594	1.56737645558302e-16	2.39663140419498e-14	1816.45764678585	-0.0865248389171394
TGGT1_313990:E024	TGGT1_313990	E024	0.0124346551008146	1.58781685863156e-16	2.42007558893747e-14	80.2194149498394	1.29024290488111
TGGT1_318410:E019	TGGT1_318410	E019	0.0461727086131978	1.58870386094861e-16	2.42007558893747e-14	21.5360524310219	2.91287725492276
TGGT1_242000:E018	TGGT1_242000	E018	0.0474634800351682	1.62611441341255e-16	2.47239825172999e-14	20.949721148445	2.46850628768988
TGGT1_278518:E033	TGGT1_278518	E033	0.112693561550772	1.64543593268813e-16	2.49707274484166e-14	8.81772697290255	-2.9963191909912
TGGT1_311335:E025	TGGT1_311335	E025	0.00342118425474671	1.70095783969452e-16	2.57648839001383e-14	294.905322380841	-0.513731271148769
TGGT1_235920:E058	TGGT1_235920	E058	0.010799782861901	2.01762167756084e-16	3.0504248340426e-14	92.4231721224482	-0.884261157384397
TGGT1_211420:E010	TGGT1_211420	E010	0.00201005872270158	2.2067479817008e-16	3.3301270710769e-14	507.568500927712	0.39606553694078
TGGT1_228770:E005	TGGT1_228770	E005	0.0152273645171848	2.3992342773953e-16	3.61384663032667e-14	65.4555214298836	1.0747214588207
TGGT1_224260:E016	TGGT1_224260	E016	0.0162575270420473	2.53344694552772e-16	3.80889830814117e-14	61.2942939435156	-1.13665571133028
TGGT1_230460:E009	TGGT1_230460	E009	0.00273912041688938	2.60512988318026e-16	3.90938961186911e-14	369.794153802617	-0.253020929475223
TGGT1_215690:E004	TGGT1_215690	E004	0.025345467380206	2.73797451713439e-16	4.10112008610102e-14	39.2702014947301	1.57162909097423
TGGT1_240610:E010	TGGT1_240610	E010	0.00479899577917463	2.89108858514028e-16	4.32244512817223e-14	209.287372127297	-0.511682511747422
TGGT1_310970:E021	TGGT1_310970	E021	0.0110842051769674	3.0385936028129e-16	4.53458141447504e-14	90.0401390373129	0.915060775894471
TGGT1_220880:E012	TGGT1_220880	E012	0.0196750509878749	3.17011805094301e-16	4.72213064285764e-14	50.6187013913605	1.38073243704317
TGGT1_280740:E008	TGGT1_280740	E008	0.0578348371965878	3.27060166702307e-16	4.86283656698173e-14	17.1894071365571	15.9055758982948
TGGT1_282055:E036	TGGT1_282055	E036	0.0872607219078078	3.35567716103653e-16	4.98015800728463e-14	11.3892927267898	16.0825453561909
TGGT1_217182:E022	TGGT1_217182	E022	0.0146914725171822	3.54783542912284e-16	5.25567877743545e-14	67.8517828860515	1.07070560074774
TGGT1_234310:E010	TGGT1_234310	E010	0.0171387706495186	3.60588571307433e-16	5.33188979936001e-14	58.1328394121408	1.08398029375167
TGGT1_306350:E022	TGGT1_306350	E022	0.00371531699807385	3.77703097856627e-16	5.57474581452556e-14	355.921072284149	-0.12192082192086
TGGT1_225060:E011	TGGT1_225060	E011	0.0183930060686858	3.96502589321221e-16	5.84153951621328e-14	54.157206907637	1.32765662482326
TGGT1_307770:E001	TGGT1_307770	E001	0.00285060565253589	4.08274130577714e-16	6.00400945941562e-14	355.056633842841	-0.362619942134297
TGGT1_312905:E017	TGGT1_312905	E017	0.00472366737114352	4.37241909178953e-16	6.41831373410232e-14	212.662909678011	-0.566143331709393
TGGT1_266870:E003	TGGT1_266870	E003	0.0189556602906454	4.63576375060074e-16	6.7925296988158e-14	52.5451518543339	1.29126399259186
TGGT1_300300:E003	TGGT1_300300	E003	0.0120723315438248	4.86263748019335e-16	7.11204777107626e-14	82.6376780276717	0.797175302757139
TGGT1_315670:E009	TGGT1_315670	E009	0.0267578880763421	5.07143557618973e-16	7.40402081814969e-14	37.1931849780562	1.49250452431587
TGGT1_312075:E001	TGGT1_312075	E001	0.0200685520237168	5.24677397976615e-16	7.6461786508379e-14	49.6235389201686	1.91002010991243
TGGT1_238230:E018	TGGT1_238230	E018	0.0242150078495568	5.55945141049413e-16	8.08724882209448e-14	41.1075392845036	-1.33352434679933
TGGT1_314810:E002	TGGT1_314810	E002	0.00354393359925042	5.69246929318416e-16	8.26585446736013e-14	588.257971026295	0.452503657510839
TGGT1_298060:E068	TGGT1_298060	E068	0.0289433780275377	5.77085399388555e-16	8.36463011124506e-14	34.3795859591062	1.83932384920161
TGGT1_226940:E001	TGGT1_226940	E001	0.00237200635353751	5.81757926191124e-16	8.41724483351979e-14	428.34046615776	-0.333578511083129
TGGT1_212290:E008	TGGT1_212290	E008	0.0210901887509486	5.92335405945612e-16	8.55495509821449e-14	47.213628041771	1.35477242062702
TGGT1_304700:E040	TGGT1_304700	E040	0.0189919389296588	7.35050380816717e-16	1.05971950884353e-13	52.444497412861	1.87801922396663
TGGT1_294898:E017	TGGT1_294898	E017	0.0115863894173705	7.38574825397417e-16	1.06290264756614e-13	86.1195582468601	0.953693642416036
TGGT1_304955:E032	TGGT1_304955	E032	0.00427116830898921	7.83010658764665e-16	1.12484636183924e-13	494.574791464959	-0.500150939751973
TGGT1_235920:E064	TGGT1_235920	E064	0.0135160273309817	8.00702796439394e-16	1.14821918775372e-13	73.7759579032574	-0.983093654918287
TGGT1_206550:E027	TGGT1_206550	E027	0.00983860388901227	8.30040545606627e-16	1.18817949378637e-13	101.501525387134	1.87981558936044
TGGT1_359210:E011	TGGT1_359210	E011	0.00229190181039647	8.38332694636802e-16	1.19792548852216e-13	443.667322008496	-0.366966758070736
TGGT1_227840:E005	TGGT1_227840	E005	0.0109283784574292	9.0601610518183e-16	1.29007425488281e-13	91.3302953292948	0.854406008461274
TGGT1_241610:E003	TGGT1_241610	E003	0.00517315023898359	9.05218937840791e-16	1.29007425488281e-13	193.993073924567	-0.585065607553222
TGGT1_274150:E013	TGGT1_274150	E013	0.0167800415987403	9.0932655746874e-16	1.29250844396547e-13	59.3795755584327	1.13054719704668
TGGT1_268230:E003	TGGT1_268230	E003	0.00231390788804287	9.56657659168463e-16	1.35739465927884e-13	439.348565947478	-0.352662472056241
TGGT1_309820:E004	TGGT1_309820	E004	0.00572074440216411	9.88166504121123e-16	1.39964250368805e-13	175.249546903114	0.623253637508655
TGGT1_258030:E002	TGGT1_258030	E002	0.030665990631119	1.01968422603654e-15	1.44175492099929e-13	32.445010983151	1.8659370913165
TGGT1_234220:E013	TGGT1_234220	E013	0.0197140755097023	1.04466540545854e-15	1.47449408233733e-13	50.5182291511188	1.23805283375354
TGGT1_200350:E018	TGGT1_200350	E018	0.00481088696217071	1.07121307696639e-15	1.50932613907297e-13	208.764285438359	0.54054689330693
TGGT1_243310:E001	TGGT1_243310	E001	0.0416474561826874	1.09351597619206e-15	1.53806641703599e-13	41.42676959345	1.6291948701955
TGGT1_278518:E034	TGGT1_278518	E034	0.00740614632065493	1.24611460800053e-15	1.74965326742474e-13	135.079723068659	-1.15352836292819
TGGT1_258080:E025	TGGT1_258080	E025	0.0128589304870406	1.27292228566283e-15	1.78419063772549e-13	77.5616075438238	0.984475243808755
TGGT1_313422:E008	TGGT1_313422	E008	0.0375059326015977	1.29588485880505e-15	1.81322814689126e-13	26.5196199441883	1.78539455999626
TGGT1_209300:E028	TGGT1_209300	E028	0.0559889930514164	1.31915419895271e-15	1.84259367218767e-13	17.756646354404	-2.11781435236601
TGGT1_250720:E001	TGGT1_250720	E001	0.00767735920441794	1.42509442585205e-15	1.98713296150545e-13	130.274545697036	-0.727787629148273
TGGT1_231200:E001	TGGT1_231200	E001	0.00273641633925461	1.61010708789691e-15	2.24124130588547e-13	370.166825206225	-0.298975836316776
TGGT1_220290:E003	TGGT1_220290	E003	0.00512641338946144	1.64161234633523e-15	2.28116304270869e-13	195.780235767595	-0.437921831116205
TGGT1_227840:E002	TGGT1_227840	E002	0.0118299765035959	1.71367569378461e-15	2.37720974463403e-13	84.3382863981867	0.893373523239929
TGGT1_224110:E008	TGGT1_224110	E008	0.0082548335180151	1.76838303127353e-15	2.44889200737338e-13	143.015622299376	0.702771284895151
TGGT1_219130:E002	TGGT1_219130	E002	0.029873756191006	1.78350309816733e-15	2.46560141490649e-13	33.3069690428516	1.74658467111777
TGGT1_408560:E004	TGGT1_408560	E004	0.00401192481123432	1.87518065335291e-15	2.58790957347773e-13	250.89791113055	-0.48215213670638
TGGT1_249180:E015	TGGT1_249180	E015	0.000716604471521202	2.06790181065934e-15	2.84901113794508e-13	1497.20955297079	-0.195632310745125
TGGT1_219700:E007	TGGT1_219700	E007	0.033661691895679	2.07716902977682e-15	2.85690360509423e-13	29.5530155164548	1.71024005950044
TGGT1_265000:E014	TGGT1_265000	E014	0.0255818863428589	2.11833453800788e-15	2.90856698853854e-13	38.9065233198296	1.66062073873801
TGGT1_286090:E008	TGGT1_286090	E008	0.00301073769980356	2.18180350430688e-15	2.99062658608176e-13	355.656860759973	-0.427490042021561
TGGT1_294020:E006	TGGT1_294020	E006	0.0273895144707402	2.26156623821092e-15	3.09470424138912e-13	36.3338075754783	1.5409899934486
TGGT1_250220:E044	TGGT1_250220	E044	0.041295829372436	2.35672391772316e-15	3.21946032990489e-13	24.0826593989612	2.03100488234841
TGGT1_313418:E002	TGGT1_313418	E002	0.0142980760970827	2.3696022183217e-15	3.23158505230072e-13	69.7256270642421	0.950042766331152
TGGT1_312905:E016	TGGT1_312905	E016	0.00404689903286294	2.51857581747124e-15	3.42895815554031e-13	248.700701512396	-0.501009058737208
TGGT1_319540:E002	TGGT1_319540	E002	0.0228359101067904	2.54228934277368e-15	3.45541633146183e-13	43.5958891672569	1.47848265107193
TGGT1_278580:E001	TGGT1_278580	E001	0.00633000714631536	2.61208995927732e-15	3.54432072037402e-13	158.238782256149	0.348023922151178
TGGT1_306220:E018	TGGT1_306220	E018	0.0143377349119343	2.66655361141668e-15	3.61215110432426e-13	69.5320443669273	1.00151470904675
TGGT1_309370:E001	TGGT1_309370	E001	0.0631022645909846	2.68379798160937e-15	3.62942093878111e-13	15.7533195853457	3.40440585693872
TGGT1_230380:E004	TGGT1_230380	E004	0.0117024294996088	2.74104215725889e-15	3.70063609642636e-13	85.2617045837009	0.869015767370673
TGGT1_282055:E040	TGGT1_282055	E040	0.0828250834335464	2.94674328868092e-15	3.97170817047836e-13	11.9996303508507	3.64154310118506
TGGT1_304700:E017	TGGT1_304700	E017	0.0188279008849332	3.02018289662641e-15	4.06390776931888e-13	52.9027151025872	1.76896526813494
TGGT1_215710:E030	TGGT1_215710	E030	0.0162154702001345	3.19897478743355e-15	4.29732494947501e-13	61.4537917691997	1.06915501564575
TGGT1_305320:E004	TGGT1_305320	E004	0.00851239075761458	3.28439273801147e-15	4.40474165620193e-13	117.414738784672	0.683323686418448
TGGT1_270540:E013	TGGT1_270540	E013	0.0104836742803191	3.30603763881385e-15	4.42641706085633e-13	95.224176313961	0.966702048849763
TGGT1_275660:E002	TGGT1_275660	E002	0.00136269297256109	3.31670566510153e-15	4.43334820980086e-13	758.494960136406	0.94695783862439
TGGT1_300052:E005	TGGT1_300052	E005	0.0094638715549836	3.35395722698485e-15	4.47573118546483e-13	164.714778046771	-0.729273252907153
TGGT1_258880:E005	TGGT1_258880	E005	0.00280375061608665	3.52746399985129e-15	4.69950174963686e-13	494.612043064052	-0.289425613401778
TGGT1_239250:E006	TGGT1_239250	E006	0.00485360080641199	3.5554980098897e-15	4.72904665285742e-13	206.906700013215	0.540705020061263
TGGT1_306430:E024	TGGT1_306430	E024	0.0173165742377499	3.87367494918596e-15	5.14376886550212e-13	57.534101484323	1.1859775635002
TGGT1_308090:E007	TGGT1_308090	E007	0.0235395268936435	4.03027936247221e-15	5.34293274760582e-13	42.2898177552814	1.24442789025695
TGGT1_316450:E007	TGGT1_316450	E007	0.0201449008690383	4.0929606054257e-15	5.41713400785318e-13	49.4349683801893	1.51243673554568
TGGT1_240610:E002	TGGT1_240610	E002	0.0248238159639406	4.10585156262052e-15	5.42530156969178e-13	40.0972043171954	1.5685067210002
TGGT1_249820:E021	TGGT1_249820	E021	0.0408580082089954	4.24260381652692e-15	5.59684018181864e-13	24.3410579188776	1.99402254532609
TGGT1_266372:E015	TGGT1_266372	E015	0.0420161716989245	4.39972041653209e-15	5.79463993195299e-13	23.6692528945969	1.91141128887047
TGGT1_238230:E014	TGGT1_238230	E014	0.0364241075555058	4.41196993699649e-15	5.80130933002299e-13	27.3084262589536	-1.61162681618568
TGGT1_235930:E011	TGGT1_235930	E011	0.0031417296530935	4.41940961912191e-15	5.80164285528142e-13	344.155139364428	0.461312406676161
TGGT1_236960:E013	TGGT1_236960	E013	0.00739108079075938	4.85974352139632e-15	6.36934079870019e-13	135.357058181318	-0.769916693913106
TGGT1_216450:E003	TGGT1_216450	E003	0.0128277103593367	4.99758556612012e-15	6.5393852622481e-13	77.75116363831	0.942966832824131
TGGT1_203320:E022	TGGT1_203320	E022	0.00396907398138885	5.01935647688479e-15	6.55724506733485e-13	253.643460963241	0.466283644202782
TGGT1_219550:E001	TGGT1_219550	E001	0.000985421973139341	5.22980360202402e-15	6.82113398722793e-13	1065.46370636951	0.208208747823313
TGGT1_300040:E006	TGGT1_300040	E006	0.0116895613457524	5.27404795359553e-15	6.8677461537667e-13	88.6670515610608	0.866914914018967
TGGT1_226950:E006	TGGT1_226950	E006	0.0251702026477765	5.33296054922309e-15	6.93327809889736e-13	39.5442264566714	1.46551491761666
TGGT1_215050:E001	TGGT1_215050	E001	0.00627046327601041	5.63049416179444e-15	7.30832710856067e-13	159.754267944366	0.246057021624636
TGGT1_207750:E021	TGGT1_207750	E021	0.0206476282719277	5.80520352969875e-15	7.5194584284654e-13	48.2282180864817	1.28728106154659
TGGT1_250220:E035	TGGT1_250220	E035	0.0424257887663105	5.81178182865227e-15	7.5194584284654e-13	23.4404414421517	2.00479090499835
TGGT1_260270:E012	TGGT1_260270	E012	0.0184551544522544	5.84701095751767e-15	7.55293487448303e-13	53.9743031964256	1.29384445018067
TGGT1_201260:E018	TGGT1_201260	E018	0.00206477363115088	6.19306851261351e-15	7.98717869594012e-13	620.653813870866	-0.349763152409546
TGGT1_281400:E003	TGGT1_281400	E003	0.0273086568265339	6.48736867772133e-15	8.35339250711056e-13	37.412553454808	1.40857903188421
TGGT1_228470:E004	TGGT1_228470	E004	0.00573446358758431	6.79071492299645e-15	8.73006957497003e-13	174.826350955599	0.64085323880426
TGGT1_214620:E001	TGGT1_214620	E001	0.0553074747781673	7.01830184889437e-15	9.00830842242428e-13	17.9756607650944	2.67824098407036
TGGT1_314970:E002	TGGT1_314970	E002	0.0226674679787991	7.15429973514501e-15	9.16829189074496e-13	43.9206128987325	1.35329500754118
TGGT1_238230:E020	TGGT1_238230	E020	0.0214571817668442	7.51172677228468e-15	9.61108179018072e-13	46.4041018167825	-1.21285155092774
TGGT1_262700:E003	TGGT1_262700	E003	0.0260923452191018	7.5360479798936e-15	9.62694357051756e-13	38.1438180897927	1.69588762347385
TGGT1_213445:E023	TGGT1_213445	E023	0.0158223788928635	7.70125724429052e-15	9.82244871434116e-13	62.9857025778861	1.04629813519307
TGGT1_309980:E066	TGGT1_309980	E066	0.0100019931853426	7.88328960092731e-15	1.00387600304553e-12	99.8345604714021	0.843043662093952
TGGT1_249710:E002	TGGT1_249710	E002	0.018477817991859	7.94268274048176e-15	1.00984644260283e-12	53.9079110568706	1.33548862894312
TGGT1_271145:E001	TGGT1_271145	E001	0.00911528619195039	8.7042711759692e-15	1.10493605879225e-12	405.111341972965	-0.565508249718333
TGGT1_262110:E003	TGGT1_262110	E003	0.0110807699552132	8.94757625228025e-15	1.13403856943147e-12	90.0681876726496	0.996641406606292
TGGT1_293540:E004	TGGT1_293540	E004	0.0148888107839196	9.2405605776832e-15	1.16933645492046e-12	66.9492405027246	0.959301130326359
TGGT1_213920:E007	TGGT1_213920	E007	0.0117863355771931	1.01498029577134e-14	1.28238551141001e-12	84.6519796893365	0.865825987784707
TGGT1_250840:E002	TGGT1_250840	E002	0.00407630571676023	1.04797584469348e-14	1.32200515345825e-12	246.8828294001	-0.459975361021275
TGGT1_320040:E012	TGGT1_320040	E012	0.0738385570391731	1.06617621696509e-14	1.34286640993255e-12	13.4610994326527	2.85093192771038
No_genes_on_ref_contig_268+No_genes_on_ref_contig_269+No_genes_on_ref_contig_272+No_genes_on_ref_contig_271+No_genes_on_ref_contig_270:E003	No_genes_on_ref_contig_268+No_genes_on_ref_contig_269+No_genes_on_ref_contig_272+No_genes_on_ref_contig_271+No_genes_on_ref_contig_270	E003	0.000668240411930243	1.08511924534535e-14	1.36459660861303e-12	1614.94652464306	-0.184274313356112
TGGT1_261022:E016	TGGT1_261022	E016	0.0745167122375721	1.09297818664414e-14	1.37234205130194e-12	46.8631750750715	2.2310183284335
TGGT1_275802:E014	TGGT1_275802	E014	0.0334765193941391	1.10212264246737e-14	1.38167502390688e-12	30.8702682197363	1.6267146763591
TGGT1_222330:E019	TGGT1_222330	E019	0.0208941297597184	1.11498268727801e-14	1.39562987995954e-12	47.6577859283408	1.40881908703409
TGGT1_236240:E001	TGGT1_236240	E001	0.0362178454492976	1.16236542637178e-14	1.45268688387191e-12	27.4641777093722	1.58804591458591
TGGT1_308090:E008	TGGT1_308090	E008	0.0241684679672555	1.18305849775366e-14	1.47626318108411e-12	41.1868724811434	1.23920281194092
TGGT1_228270:E002	TGGT1_228270	E002	0.0278339568256176	1.22403652769749e-14	1.52503995468606e-12	35.7525313956322	1.72516815015352
TGGT1_240810:E001	TGGT1_240810	E001	0.00428180145273396	1.27565392238834e-14	1.58690168604042e-12	1127.70301033574	0.415477485148014
TGGT1_235920:E054	TGGT1_235920	E054	0.0204300334447392	1.29951163802498e-14	1.61409341686072e-12	48.7432254334292	-1.20226620684169
TGGT1_217020:E042	TGGT1_217020	E042	0.00980523577507325	1.30435907921432e-14	1.61762565684129e-12	101.848829277243	0.728430014089986
TGGT1_214620:E017	TGGT1_214620	E017	0.0430233883909908	1.35376020560637e-14	1.67631641410476e-12	23.1144478942419	2.03111642373938
TGGT1_292235:E001	TGGT1_292235	E001	0.0248053906248351	1.36228777464176e-14	1.68429254955134e-12	40.127052384801	1.43592028957751
TGGT1_263320:E004	TGGT1_263320	E004	0.00330523307069179	1.37494410423975e-14	1.69734116599077e-12	305.420217831919	0.433691888061495
TGGT1_209880:E023	TGGT1_209880	E023	0.00104357605988362	1.41492238743203e-14	1.74136827666654e-12	1002.89953345997	-0.202329011575012
TGGT1_295090:E010	TGGT1_295090	E010	0.0078736378762103	1.4147668604864e-14	1.74136827666654e-12	127.004886509914	-0.667252014251068
TGGT1_299010:E013	TGGT1_299010	E013	0.00809566260102137	1.42102801265821e-14	1.74356681765897e-12	123.498711614123	-0.701498315554687
TGGT1_304970:E013	TGGT1_304970	E013	0.0210749896999636	1.41993575164105e-14	1.74356681765897e-12	47.2477641876624	1.28069606381033
TGGT1_225060:E030	TGGT1_225060	E030	0.00521528624666751	1.55038613552951e-14	1.89939946361116e-12	192.409582613866	-0.629109055056592
TGGT1_230400:E004	TGGT1_230400	E004	0.024977410847724	1.58228236922051e-14	1.93553889513664e-12	39.8501060485367	1.32846983117912
TGGT1_234220:E003	TGGT1_234220	E003	0.00234130766185403	1.58912428056685e-14	1.94096745524304e-12	434.087391045304	-0.282176987229283
TGGT1_292220:E004	TGGT1_292220	E004	0.00418271637933791	1.59699136785559e-14	1.94762988042026e-12	240.521051473783	0.490550308761761
TGGT1_270000:E039	TGGT1_270000	E039	0.0233729500823317	1.69540549177022e-14	2.06453336920163e-12	42.5919010858949	1.49232571397295
TGGT1_214620:E038	TGGT1_214620	E038	0.0232065670006176	1.7344092573034e-14	2.10884836428298e-12	42.8979721900662	1.29403852978313
TGGT1_249820:E023	TGGT1_249820	E023	0.0434421549393181	1.79198186976752e-14	2.17557377828092e-12	22.891359757971	2.02763024471515
TGGT1_207750:E013	TGGT1_207750	E013	0.00423535984753417	1.80489545391447e-14	2.18796147855532e-12	237.493450735015	0.502504758520947
TGGT1_207400:E014	TGGT1_207400	E014	0.00496006541896715	1.93720949302047e-14	2.34483670793115e-12	202.417415953723	0.179348679087295
TGGT1_208310:E002	TGGT1_208310	E002	0.0207891654042143	1.95543490478084e-14	2.36335384786649e-12	47.8990272935499	1.11529292342505
TGGT1_204330:E011	TGGT1_204330	E011	0.0238202099041621	1.99639908865275e-14	2.40925680750942e-12	41.7903842415734	1.23017558538249
TGGT1_299810:E006	TGGT1_299810	E006	0.0214088654732575	2.03555258460644e-14	2.45284086445076e-12	46.509089220314	1.28823321345869
TGGT1_253810:E007	TGGT1_253810	E007	0.0226790463264051	2.1006720822171e-14	2.52753741516836e-12	43.8981373426091	1.3489014298403
TGGT1_221370:E006	TGGT1_221370	E006	0.0702933121629094	2.26164875593298e-14	2.71717577842633e-12	14.1405246652834	14.0011972190725
TGGT1_269430:E020	TGGT1_269430	E020	0.0181936735667458	2.34041794042671e-14	2.80763213106019e-12	54.7523016790222	1.85138693572389
TGGT1_269900:E001	TGGT1_269900	E001	0.0182752055596046	2.46004614097594e-14	2.94676298503994e-12	54.5073194166458	1.13243152906145
TGGT1_253890:E020	TGGT1_253890	E020	0.00216825738017449	2.50936881753282e-14	3.00139098494093e-12	469.603925086648	-0.324476041196893
TGGT1_217020:E037	TGGT1_217020	E037	0.0257367648199359	2.56474066295281e-14	3.06308191454874e-12	38.6719068701334	1.22474682837074
TGGT1_289350:E019	TGGT1_289350	E019	0.0169014577491087	2.63996478788119e-14	3.14826524593188e-12	58.95165913199	-1.09747072094935
No_genes_on_ref_contig_696+No_genes_on_ref_contig_695+No_genes_on_ref_contig_687+No_genes_on_ref_contig_686+No_genes_on_ref_contig_694+No_genes_on_ref_contig_684+No_genes_on_ref_contig_685+No_genes_on_ref_contig_691+No_genes_on_ref_contig_690+No_genes_on_ref_contig_693+No_genes_on_ref_contig_692+No_genes_on_ref_contig_688+No_genes_on_ref_contig_689:E002	No_genes_on_ref_contig_696+No_genes_on_ref_contig_695+No_genes_on_ref_contig_687+No_genes_on_ref_contig_686+No_genes_on_ref_contig_694+No_genes_on_ref_contig_684+No_genes_on_ref_contig_685+No_genes_on_ref_contig_691+No_genes_on_ref_contig_690+No_genes_on_ref_contig_693+No_genes_on_ref_contig_692+No_genes_on_ref_contig_688+No_genes_on_ref_contig_689	E002	0.00435131667133778	2.68873852775123e-14	3.20170066427722e-12	231.086205483251	-0.417682893689834
TGGT1_207480:E061	TGGT1_207480	E061	0.0221480460909633	2.7467241309254e-14	3.26593185140298e-12	44.9531317004179	1.5419637793941
TGGT1_286090:E003	TGGT1_286090	E003	0.00464052678942562	2.91102088956676e-14	3.45619516939959e-12	1351.15195850452	0.429728710624218
TGGT1_215690:E003	TGGT1_215690	E003	0.00352229240493853	2.96038390385851e-14	3.50964162229099e-12	286.310144106568	0.368061540554643
TGGT1_213060:E021	TGGT1_213060	E021	0.00496671232990258	3.08022365094255e-14	3.6417262939409e-12	202.14358843903	-0.519415297017968
TGGT1_282055:E044	TGGT1_282055	E044	0.0886355435153517	3.08081880072042e-14	3.6417262939409e-12	11.2125278331119	3.59162370139895
TGGT1_243280A:E010	TGGT1_243280A	E010	0.051228883315684	3.09248327934909e-14	3.65017013974048e-12	19.4082825583785	2.76653041873591
TGGT1_310380:E006	TGGT1_310380	E006	0.0189786261638908	3.22405091793038e-14	3.79990877166583e-12	52.4813886240674	-1.09058031549394
TGGT1_281580:E012	TGGT1_281580	E012	0.00936080875127594	3.22887016915792e-14	3.80004129893534e-12	106.711995559336	0.760313015219055
TGGT1_248900:E008	TGGT1_248900	E008	0.00896380961218919	3.50031792822836e-14	4.11351045029864e-12	111.466400416337	0.949476105899284
TGGT1_264110:E007	TGGT1_264110	E007	0.0104508962179252	3.56739388548356e-14	4.1862433916354e-12	145.288114760085	-0.238367843383755
TGGT1_240240:E001	TGGT1_240240	E001	0.0212967440890764	3.73545892210103e-14	4.37710124928631e-12	231.730785654142	-0.174712474516467
TGGT1_247600:E001	TGGT1_247600	E001	0.0333503011447388	4.12596213202321e-14	4.82767467723035e-12	29.8293921304023	1.69641864960352
TGGT1_291800:E010	TGGT1_291800	E010	0.042078158514292	4.2480780757344e-14	4.96336589644598e-12	23.6343407325504	1.90283910858078
TGGT1_207430:E008	TGGT1_207430	E008	0.0295756356924932	4.28069737943539e-14	4.99425004232248e-12	33.6433063167103	1.50688614284896
TGGT1_285830:E024	TGGT1_285830	E024	0.0137132598786019	4.56249820307481e-14	5.31534332503961e-12	87.7174662966059	0.91080556375046
TGGT1_262720:E002	TGGT1_262720	E002	0.0158073994131074	4.85344845636812e-14	5.64615505943631e-12	235.653167370758	0.840235296152948
TGGT1_261022:E076	TGGT1_261022	E076	0.00527206415636399	4.87940737057451e-14	5.66818638940048e-12	304.265198280586	0.538013207085189
TGGT1_304730:E017	TGGT1_304730	E017	0.015894400453055	4.91140084236681e-14	5.69715441104144e-12	62.6993396147156	-0.963082356320856
TGGT1_225060:E001	TGGT1_225060	E001	0.035444353772749	4.93127566668619e-14	5.71200202223687e-12	28.0644215583971	2.12298269027934
TGGT1_294870:E004	TGGT1_294870	E004	0.0109959372852273	5.08564941916851e-14	5.88237687473595e-12	90.766434893031	0.836194573984945
TGGT1_211420:E007	TGGT1_211420	E007	0.000316642015330698	5.26410677925979e-14	6.08008098459998e-12	19640.507849003	-0.043850265376304
TGGT1_250840:E034	TGGT1_250840	E034	0.0244101594729662	5.31347652327956e-14	6.12833610152821e-12	40.7781792817626	1.29101618369269
TGGT1_280375:E015	TGGT1_280375	E015	0.0621936087985743	5.44044750227099e-14	6.26582780450568e-12	15.9836745027606	2.375627546364
TGGT1_225105:E006	TGGT1_225105	E006	0.015171800889767	5.61906829279606e-14	6.46232875525484e-12	65.6960827119254	-0.984753415149582
TGGT1_256830:E012	TGGT1_256830	E012	0.044454245196611	5.98658262069783e-14	6.87520267257524e-12	22.3695673014316	1.96674399639295
TGGT1_209420:E004	TGGT1_209420	E004	0.0154285452140969	6.16178440836316e-14	7.06635886660795e-12	64.599059295827	1.00519219275763
TGGT1_227840:E013	TGGT1_227840	E013	0.012428773794732	6.27401763092187e-14	7.18486260187911e-12	80.2575380740125	0.862208189821106
TGGT1_299010:E019	TGGT1_299010	E019	0.00235671080790088	6.37897602060132e-14	7.2947114592528e-12	431.184709885104	0.323801220041899
TGGT1_270000:E030	TGGT1_270000	E030	0.0206845836633966	6.43852129067557e-14	7.35239061389946e-12	48.1418305675621	1.31761470511791
TGGT1_267730:E003	TGGT1_267730	E003	0.0390346933410803	6.62714894877472e-14	7.55710268897355e-12	28.9742287496755	1.76331368369032
TGGT1_206550:E035	TGGT1_206550	E035	0.00794655559590362	6.72410924421167e-14	7.65685415841225e-12	125.831630703591	1.16115019501229
TGGT1_309610:E011	TGGT1_309610	E011	0.00533025953509616	6.83692596193995e-14	7.77435517658059e-12	188.217469820164	-0.510499837361428
TGGT1_247040:E002	TGGT1_247040	E002	0.00529292658734879	6.89848719352454e-14	7.83332438212664e-12	189.558519601037	0.528210601691877
TGGT1_286220:E021	TGGT1_286220	E021	0.0331293298666393	7.15503067499165e-14	8.11322193181813e-12	30.0286730645605	1.8195598416281
TGGT1_216090:E003	TGGT1_216090	E003	0.0125088148050974	7.37697240598601e-14	8.34792182503389e-12	79.7417945558896	-0.324419730655203
TGGT1_253430:E011	TGGT1_253430	E011	0.00848801008061986	7.38269174840428e-14	8.34792182503389e-12	300.776617164147	-0.658618840825585
TGGT1_222410:E011	TGGT1_222410	E011	0.0225201673501172	7.43596610383605e-14	8.39640172577907e-12	44.2085706969078	1.7870902326815
TGGT1_310200:E017	TGGT1_310200	E017	0.00925720197421824	7.70391048109783e-14	8.6868046465284e-12	107.913223566138	0.823438457018091
TGGT1_293900:E007	TGGT1_293900	E007	0.00498844768647522	7.7916954458527e-14	8.77353600865994e-12	201.253323685639	0.526050292901836
TGGT1_248940:E002	TGGT1_248940	E002	0.0252852592984631	8.0110567628448e-14	9.00797587393141e-12	39.3639070839901	1.30011738353357
TGGT1_225060:E007	TGGT1_225060	E007	0.00948566261713716	8.16107694945096e-14	9.16390191257196e-12	105.299487704598	-0.82093490899395
TGGT1_262720:E010	TGGT1_262720	E010	0.0122876592009707	8.19891045025831e-14	9.1935977111334e-12	81.1832450748255	0.872306618155112
TGGT1_227370:E002	TGGT1_227370	E002	0.0272677924261974	8.30762110757813e-14	9.30257683939418e-12	36.4963170059711	-1.83595749331431
TGGT1_257040:E003	TGGT1_257040	E003	0.00772741240062454	8.33486185553986e-14	9.32015335051261e-12	474.691247068506	-0.572794100064154
TGGT1_309140:E021	TGGT1_309140	E021	0.0437316181931966	8.38459810239369e-14	9.36280121433962e-12	22.7396553200244	1.92124437515408
TGGT1_230980:E021	TGGT1_230980	E021	0.0224948520768563	8.5878681555204e-14	9.57654054607651e-12	44.2584401464989	1.21870550171523
TGGT1_280390:E024	TGGT1_280390	E024	0.0423262077411317	8.95583559566545e-14	9.97309499056621e-12	23.4956592794469	2.19339703570248
TGGT1_300055:E006	TGGT1_300055	E006	0.00462850255867321	9.03800166257909e-14	1.00507309122358e-11	217.086244675207	-0.487805140611514
TGGT1_244715:E006	TGGT1_244715	E006	0.00827917483910634	9.1794390583735e-14	1.01939754109736e-11	120.743589088256	-0.686234187283624
TGGT1_306430:E019	TGGT1_306430	E019	0.0373563625100807	9.4271623924381e-14	1.04546971944161e-11	26.62595258191	1.9637235080949
TGGT1_202380:E015	TGGT1_202380	E015	0.00617319272047576	9.46650963619676e-14	1.04839321739142e-11	422.795686539058	0.516099248649969
TGGT1_262630:E011	TGGT1_262630	E011	0.00436083725396016	9.91431500026238e-14	1.09648249526874e-11	230.575465310303	0.357653816448866
TGGT1_316220:E001	TGGT1_316220	E001	0.00386535136119311	9.95666065198298e-14	1.09965936763043e-11	260.544727756129	-0.270458728487436
TGGT1_311250:E001	TGGT1_311250	E001	0.0695563682193193	1.00974182429712e-13	1.11368177847852e-11	14.2904570590339	14.4788399470881
TGGT1_269430:E047	TGGT1_269430	E047	0.0109686778043333	1.01303615538773e-13	1.11579091412317e-11	90.9931083863838	1.09486617454802
TGGT1_224960:E002	TGGT1_224960	E002	0.00160550025134183	1.01464658012923e-13	1.1160421205277e-11	639.851691901533	0.151603686478895
TGGT1_272320:E017	TGGT1_272320	E017	0.0248395873837309	1.01932902926148e-13	1.11966706363845e-11	40.0716907062066	1.30857695062132
TGGT1_313430:E019	TGGT1_313430	E019	0.00275073498406664	1.02841824326263e-13	1.12811612594848e-11	368.20195045121	0.385002319845761
TGGT1_263335:E001	TGGT1_263335	E001	0.023825269840489	1.03100025764271e-13	1.12941391859951e-11	44.1781178070484	-0.885481479543808
TGGT1_203060:E002	TGGT1_203060	E002	0.00217702520907307	1.09371405696563e-13	1.19487150729526e-11	467.665235625361	0.317564940696813
TGGT1_250940:E027	TGGT1_250940	E027	0.00903831673415366	1.0934970210606e-13	1.19487150729526e-11	110.542087959826	0.831588658055911
TGGT1_207630:E011	TGGT1_207630	E011	0.0423282962144063	1.11284879090789e-13	1.21374223276776e-11	23.4944985470242	1.80582897934856
TGGT1_312105:E004	TGGT1_312105	E004	0.0191861983514411	1.11399392392508e-13	1.21374223276776e-11	51.9120222626592	1.13593477649866
TGGT1_235920:E053	TGGT1_235920	E053	0.0105538795635206	1.25214268539105e-13	1.36242236799254e-11	94.5875270093076	-0.786179182125696
TGGT1_212950:E002	TGGT1_212950	E002	0.0359044109356186	1.2621999375371e-13	1.3715169846172e-11	27.7042874507084	1.55775665398242
TGGT1_235660:E010	TGGT1_235660	E010	0.00837872868339192	1.27070255146281e-13	1.37890014102621e-11	119.299775514838	0.673434721571622
TGGT1_318430:E005	TGGT1_318430	E005	0.0197340639430916	1.29329381766826e-13	1.40153122643553e-11	50.4669213897653	1.10636330248132
TGGT1_225170:E004	TGGT1_225170	E004	0.00854389681629879	1.30233703894225e-13	1.40943942143435e-11	116.97905221777	-0.644971190942496
TGGT1_310040:E006	TGGT1_310040	E006	0.0084088516055964	1.3065348022225e-13	1.41208952151852e-11	118.869687613401	0.669207323125933
TGGT1_227440:E016	TGGT1_227440	E016	0.0491458992887309	1.30854522042679e-13	1.41237163597803e-11	20.2317686607803	2.41179473515047
TGGT1_225060:E005	TGGT1_225060	E005	0.0152854644333924	1.35147850328892e-13	1.45676391138893e-11	65.2058563667092	-1.02348490801926
TGGT1_207430:E012	TGGT1_207430	E012	0.0584451906608623	1.39805777530411e-13	1.50496259318903e-11	17.0097315180391	2.59414523957346
TGGT1_240610:E004	TGGT1_240610	E004	0.0253951392124763	1.42418037531725e-13	1.5310413129326e-11	39.1932293236656	1.44805217395601
TGGT1_263980:E012	TGGT1_263980	E012	0.0231569975607013	1.51390396665023e-13	1.62533293547216e-11	42.9900103022502	1.40376409859971
TGGT1_204070:E008	TGGT1_204070	E008	0.0542047737340692	1.52123687477718e-13	1.63103664123686e-11	18.3417034176129	2.17327556377746
TGGT1_221922:E005	TGGT1_221922	E005	0.009218056869881	1.5318003655837e-13	1.64018438349336e-11	108.374145296964	-0.747933995765504
TGGT1_285240:E012	TGGT1_285240	E012	0.0301029625769002	1.53863275654234e-13	1.64531808740988e-11	93.2582871539683	1.21619228456265
No_genes_on_ref_contig_828+No_genes_on_ref_contig_829+No_genes_on_ref_contig_835+No_genes_on_ref_contig_834+No_genes_on_ref_contig_836+No_genes_on_ref_contig_831+No_genes_on_ref_contig_830+No_genes_on_ref_contig_833+No_genes_on_ref_contig_832:E014	No_genes_on_ref_contig_828+No_genes_on_ref_contig_829+No_genes_on_ref_contig_835+No_genes_on_ref_contig_834+No_genes_on_ref_contig_836+No_genes_on_ref_contig_831+No_genes_on_ref_contig_830+No_genes_on_ref_contig_833+No_genes_on_ref_contig_832	E014	0.0598264284866676	1.55941251368049e-13	1.66533292714278e-11	16.616671089556	2.56003590670985
TGGT1_292960:E002	TGGT1_292960	E002	0.0177115110906997	1.59756432373507e-13	1.70382239995708e-11	56.2473217222218	1.10440361195281
TGGT1_299995:E001	TGGT1_299995	E001	0.00921772287961426	1.60300835839678e-13	1.70737308463277e-11	108.378094872156	1.02886074994748
TGGT1_312905:E015	TGGT1_312905	E015	0.00405666393572455	1.61429401952684e-13	1.71712816424900e-11	248.094089880019	-0.465138963170908
TGGT1_202760:E018	TGGT1_202760	E018	0.0137368777555303	1.66542933554921e-13	1.7691899658627e-11	72.5852348562792	0.950488062243198
TGGT1_206610:E008	TGGT1_206610	E008	0.0263345631990054	1.6967159761901e-13	1.80005735003558e-11	37.7922714802135	1.62082218725467
TGGT1_261060:E018	TGGT1_261060	E018	0.0286771660405178	1.84614982905532e-13	1.95602239434097e-11	63.337955446357	1.29196504828415
TGGT1_261022:E018	TGGT1_261022	E018	0.044992997439887	1.87688000494648e-13	1.98597519265208e-11	22.101393889536	1.95316978035572
TGGT1_248425:E001	TGGT1_248425	E001	0.0218917618086943	1.88775120351635e-13	1.99331677724632e-11	62.6125290674884	0.365607241085176
TGGT1_258030:E014	TGGT1_258030	E014	0.0300925108896432	1.88875622046626e-13	1.99331677724632e-11	33.0644182119987	1.57152610477171
TGGT1_233925:E007	TGGT1_233925	E007	0.00462538788551793	1.93011156219636e-13	2.03430231036453e-11	217.234129026481	-0.387419739302058
TGGT1_313180:E017	TGGT1_313180	E017	0.0191945082703343	1.93855352454479e-13	2.04053609914112e-11	61.2515029888542	1.07725330670454
TGGT1_221270:E001	TGGT1_221270	E001	0.0015123370719196	1.95526868951898e-13	2.0554507506291e-11	680.705471679117	0.16859569424431
TGGT1_211270:E025	TGGT1_211270	E025	0.00255999359143771	1.96671266563814e-13	2.06479254954871e-11	396.218535653285	0.294476039049809
TGGT1_248640:E016	TGGT1_248640	E016	0.0241648938512406	1.97869322285462e-13	2.07467269282036e-11	41.1929776829629	1.26195265467137
TGGT1_210690:E004	TGGT1_210690	E004	0.000370577066194599	1.99886398059547e-13	2.09310354699578e-11	3129.65697931042	-0.110571752193445
TGGT1_220880:E021	TGGT1_220880	E021	0.00993756490372774	2.01913283016077e-13	2.11158923630867e-11	113.490540282415	-0.718026398848215
TGGT1_236580:E005	TGGT1_236580	E005	0.00319914818567032	2.04191073347189e-13	2.13264764640172e-11	315.719380371389	0.407804275726638
TGGT1_270530:E026	TGGT1_270530	E026	0.0314318029292002	2.07165276012447e-13	2.16091583447867e-11	31.6531720025755	1.52512660175337
TGGT1_279400:E001	TGGT1_279400	E001	0.0613164130820779	2.08876347901696e-13	2.17595250939916e-11	16.2125363878088	2.37816448454278
TGGT1_309730:E003	TGGT1_309730	E003	0.0142965079715986	2.11200100366471e-13	2.19732475555245e-11	69.73330355726	0.942310870416705
TGGT1_263090:E010	TGGT1_263090	E010	0.000183254170532455	2.12728418538698e-13	2.21037694603884e-11	7637.99194770695	-0.0668650809227486
TGGT1_201790:E006	TGGT1_201790	E006	0.0180303670266788	2.16239545049207e-13	2.24397167989046e-11	55.2496779790257	1.11492505056132
TGGT1_299110:E023	TGGT1_299110	E023	0.0482337040360463	2.1689363963745e-13	2.24787008936194e-11	20.6148142464956	1.96134735627666
TGGT1_214180:E004	TGGT1_214180	E004	0.00553359745509199	2.18765810177209e-13	2.26436636982782e-11	181.234060374828	0.545054646620509
TGGT1_261022:E019	TGGT1_261022	E019	0.0295841660393018	2.2363223789716e-13	2.3117732044337e-11	43.6492094682476	1.3640270637414
TGGT1_207840:E006	TGGT1_207840	E006	0.00809566125848953	2.31348670504605e-13	2.38848272547177e-11	123.498732229861	0.715149207400354
TGGT1_249180:E016	TGGT1_249180	E016	0.00115381168763381	2.4579400710174e-13	2.53437792635492e-11	902.449165004508	-0.246573654739028
TGGT1_255360:E001	TGGT1_255360	E001	0.00958169866136901	2.51513501628649e-13	2.58907440549219e-11	104.238191123031	-0.14051058887091
TGGT1_286220:E012	TGGT1_286220	E012	0.0528831398830264	2.51740064199092e-13	2.58907440549219e-11	18.8005535211482	3.09842741778411
TGGT1_253020:E018	TGGT1_253020	E018	0.0130625810756834	2.54800439325494e-13	2.61721545406409e-11	76.3474463044853	0.851187540605576
TGGT1_239910:E006	TGGT1_239910	E006	0.0576613323902099	2.57767207928494e-13	2.64432471818386e-11	17.241178396146	1.51501082827847
TGGT1_252295:E004	TGGT1_252295	E004	0.0576798222114546	2.62084223910782e-13	2.68519921541078e-11	17.2356464669453	2.65242739064441
TGGT1_235930:E010	TGGT1_235930	E010	0.0045240854798531	2.66765243781409e-13	2.72969479805983e-11	531.578549926719	0.460105178209547
TGGT1_200350:E015	TGGT1_200350	E015	0.00486443953966163	2.70090999050809e-13	2.7602274440971e-11	206.440580235107	0.496743675254984
TGGT1_253430:E010	TGGT1_253430	E010	0.0126223453638274	2.74144019721182e-13	2.7981058700619e-11	313.655075605509	-0.752745396104249
TGGT1_289380:E012	TGGT1_289380	E012	0.010688980927154	2.76015431836793e-13	2.81364973350297e-11	169.225643363746	0.714634668007911
TGGT1_235680:E034	TGGT1_235680	E034	0.00468622125213419	2.77347524828172e-13	2.82366360870145e-11	214.381750882651	-0.505783280619533
TGGT1_255635:E017	TGGT1_255635	E017	0.0229303761846058	2.80401295330223e-13	2.85115851114428e-11	43.4158697682461	1.27392831517558
TGGT1_228770:E003	TGGT1_228770	E003	0.0314112349474778	2.83146210596881e-13	2.87544771226908e-11	41.4269995692029	1.37796324096399
TGGT1_220910:E015	TGGT1_220910	E015	0.0520894144283656	2.88951258809688e-13	2.93071355276384e-11	19.0873246207435	2.14352220933725
TGGT1_292975:E039	TGGT1_292975	E039	0.0113430451876761	3.09637575003795e-13	3.13272009902619e-11	87.9758039787642	-0.795603605249043
TGGT1_299670:E006	TGGT1_299670	E006	0.0160399935364121	3.09643975849743e-13	3.13272009902619e-11	62.1283308507644	0.975907143763716
TGGT1_310300:E011	TGGT1_310300	E011	0.018076497020072	3.13662962541305e-13	3.16940917156098e-11	55.1082682516317	1.26217282669627
TGGT1_207480:E070	TGGT1_207480	E070	0.0352106742719055	3.17786440063535e-13	3.20706102981619e-11	28.2509560893745	2.28519083485365
TGGT1_282055:E038	TGGT1_282055	E038	0.105674478300562	3.19370488507957e-13	3.21902326962421e-11	9.40371087663018	15.8750897141599
TGGT1_217740:E004	TGGT1_217740	E004	0.0252516986753741	3.19880746479805e-13	3.22014614302332e-11	39.4163339406762	1.24327145886071
TGGT1_305540:E030	TGGT1_305540	E030	0.0446928568035934	3.2780648015558e-13	3.29582268684443e-11	22.2499955870402	1.84895982940046
TGGT1_261022:E064	TGGT1_261022	E064	0.00831919651285361	3.28244749284985e-13	3.29612435740339e-11	120.158980835021	0.694220570214263
TGGT1_289950:E004	TGGT1_289950	E004	0.0309058896554988	3.33859123156388e-13	3.34833742956907e-11	32.1927305317284	1.4923778324328
TGGT1_293600:E004	TGGT1_293600	E004	0.0322003407648638	3.35772387956659e-13	3.36334785876934e-11	30.8964430462421	1.49547693540357
TGGT1_214620:E004	TGGT1_214620	E004	0.0463178070447633	3.41838047901538e-13	3.41986304799637e-11	21.4685094711112	1.97348152488546
TGGT1_308000:E024	TGGT1_308000	E024	0.0238623576986544	3.46907573338745e-13	3.46628501652272e-11	41.7164054087233	1.22304235596869
TGGT1_278518:E032	TGGT1_278518	E032	0.144277935840194	3.48679317273468e-13	3.47968166626371e-11	6.88669608533944	-3.00656084585069
TGGT1_366970:E002	TGGT1_366970	E002	0.0374945564710623	3.52616208523008e-13	3.5146258759389e-11	26.5276776326432	-1.30795451505998
TGGT1_298630:E016	TGGT1_298630	E016	0.0469856399363873	3.55957000649513e-13	3.5435497469098e-11	21.163019673146	1.91486122545546
TGGT1_231420:E001	TGGT1_231420	E001	0.0231741944639494	3.77590821787573e-13	3.75428509815514e-11	42.9580352263056	-1.1072326953164
TGGT1_213885:E008	TGGT1_213885	E008	0.0169954527931927	3.82390952438568e-13	3.79733499940071e-11	58.6245970202834	-0.541748901400475
TGGT1_298840:E006	TGGT1_298840	E006	0.00620025919918826	3.86565426464516e-13	3.83407367390819e-11	161.578787509597	0.552195332154254
TGGT1_293180:E014	TGGT1_293180	E014	0.00697877518145773	3.95561794168143e-13	3.91848852173804e-11	143.415392749949	-0.629729964360102
TGGT1_280390:E028	TGGT1_280390	E028	0.0527572095192005	4.00323663744816e-13	3.9608003667203e-11	18.8454753644322	2.70502979523463
TGGT1_226100:E001	TGGT1_226100	E001	0.0245152208991943	4.13707712481859e-13	4.08821201557195e-11	40.6030418119673	1.66995855722287
TGGT1_306430:E007	TGGT1_306430	E007	0.0474583214439513	4.27497929519494e-13	4.21932094618048e-11	20.9520008827924	2.41473139624054
TGGT1_225170:E001	TGGT1_225170	E001	0.00583133916843136	4.37777660318635e-13	4.31550420095543e-11	171.89522551958	0.479367797660105
TGGT1_250220:E033	TGGT1_250220	E033	0.0472926786291211	4.39291472016004e-13	4.32514597478196e-11	21.0254680265054	1.91745997301013
TGGT1_312905:E018	TGGT1_312905	E018	0.0100159335627448	4.41360137258916e-13	4.34022054587072e-11	443.052219583155	-0.596309154489214
TGGT1_202160:E009	TGGT1_202160	E009	0.0249187887173765	4.62761444994273e-13	4.54513932623025e-11	39.9440551452058	1.42342064661231
TGGT1_258880:E003	TGGT1_258880	E003	0.0186396038982028	4.81733694836379e-13	4.72573145232261e-11	53.4386676397849	1.02006549546165
TGGT1_269910:E010	TGGT1_269910	E010	0.00377016673978032	4.82372404690617e-13	4.72625438018167e-11	267.21682320743	-0.29429085792848
TGGT1_221670:E013	TGGT1_221670	E013	0.0197004229725302	4.95690567817077e-13	4.84798368960192e-11	50.5533334789895	1.12139574700414
TGGT1_270000:E019	TGGT1_270000	E019	0.017073628965181	4.95997340386596e-13	4.84798368960192e-11	58.3553293742861	1.10165863100298
TGGT1_224290:E004	TGGT1_224290	E004	0.0210834288868299	4.97157651787171e-13	4.85344897424876e-11	47.2288041937775	1.25340042685991
TGGT1_250840:E036	TGGT1_250840	E036	0.014258106486118	5.03004910303334e-13	4.90460162238401e-11	69.9218204919185	0.898413010356589
TGGT1_269430:E008	TGGT1_269430	E008	0.00488460610085313	5.04087996957097e-13	4.90923334551643e-11	205.578882802602	-0.575951837648269
TGGT1_220880:E005	TGGT1_220880	E005	0.0143777494446544	5.12872659059368e-13	4.98876796736844e-11	69.3378117071539	0.946402512082356
TGGT1_260340:E013	TGGT1_260340	E013	0.0165565578956385	5.21036045798913e-13	5.06207522955177e-11	60.1836773809519	1.01798596968928
TGGT1_305990:E017	TGGT1_305990	E017	0.00331672447176109	5.22900019208776e-13	5.07407849168516e-11	304.34477829715	-0.377060469789196
TGGT1_250220:E034	TGGT1_250220	E034	0.0508695685519419	5.40259222311018e-13	5.23623389115006e-11	19.545515596333	2.03621218981472
TGGT1_202770:E024	TGGT1_202770	E024	0.0354804852331927	5.42175220636474e-13	5.24850317003426e-11	28.035799297793	1.56653362984481
TGGT1_306430:E015	TGGT1_306430	E015	0.0336618401535018	5.56478948763139e-13	5.38051831477749e-11	29.552885149151	1.69793234938979
TGGT1_282055:E009	TGGT1_282055	E009	0.00466684445879186	5.73962730319431e-13	5.54292835315063e-11	215.282133469864	-0.51497515328907
TGGT1_278580:E002	TGGT1_278580	E002	0.015343165577103	6.01291860722343e-13	5.79991617388511e-11	64.959782798733	-0.707528736263292
TGGT1_266010:E050	TGGT1_266010	E050	0.0599638363823544	6.17164654115519e-13	5.94591746420244e-11	16.578559953557	2.45793370415938
TGGT1_250100:E008	TGGT1_250100	E008	0.00748020149430901	6.19649890168948e-13	5.96274539723362e-11	298.611877252426	0.567328420163765
TGGT1_266640:E031	TGGT1_266640	E031	0.00882038158979055	6.23865611263288e-13	5.99616549111209e-11	113.289955007368	-0.71855992771538
TGGT1_204055:E001	TGGT1_204055	E001	0.0264739881492719	6.37733480115798e-13	6.11719795907907e-11	37.5928380379403	1.26513577200844
TGGT1_220880:E013	TGGT1_220880	E013	0.0220475742352606	6.37973701807714e-13	6.11719795907907e-11	45.1584809303393	1.25524285682396
TGGT1_270000:E037	TGGT1_270000	E037	0.0560311811502376	6.50735124245052e-13	6.23215898646789e-11	17.7432639610494	14.5642777675326
TGGT1_270830:E003	TGGT1_270830	E003	0.00504000792313793	6.54861580736362e-13	6.26424759724528e-11	266.723439375356	0.473903743885679
TGGT1_299040:E024	TGGT1_299040	E024	0.0280984471630381	6.85777695799739e-13	6.55222038702863e-11	35.4153546763735	1.39123857584201
TGGT1_219070:E037	TGGT1_219070	E037	0.00460914671096098	6.88496791613074e-13	6.57042416913494e-11	218.008534411401	-0.494229416214016
TGGT1_312905:E014	TGGT1_312905	E014	0.00054521517167849	7.23137171829631e-13	6.89285473053899e-11	2018.76654322253	-0.120678345786701
TGGT1_253120:E015	TGGT1_253120	E015	0.0189174336659262	7.48267319440244e-13	7.12398137205284e-11	52.65162983386	-1.08202755827004
TGGT1_249010:E005	TGGT1_249010	E005	0.00661977251732966	7.63671306016374e-13	7.26207336763627e-11	323.822473308657	-0.385250144580506
TGGT1_211430:E001	TGGT1_211430	E001	0.0149181204299787	7.68592860758177e-13	7.30027583686016e-11	66.8172343718022	-0.602643677357375
TGGT1_248880:E018	TGGT1_248880	E018	0.0102353314334541	7.72053405026032e-13	7.32452780902194e-11	97.5467037681815	0.76620043579747
TGGT1_207480:E068	TGGT1_207480	E068	0.0278509148699055	8.02456528874724e-13	7.60402909139681e-11	41.9390221553505	1.60769883305073
TGGT1_238140:E004	TGGT1_238140	E004	0.0210629496748396	8.35205714947071e-13	7.90508011679388e-11	47.2748404120454	1.08025555106568
TGGT1_266870:E006	TGGT1_266870	E006	0.00505661249074956	8.36300435993701e-13	7.90617279858916e-11	231.321043930587	-0.463561829078515
TGGT1_221180:E004	TGGT1_221180	E004	0.00401432266264558	8.3759591508407e-13	7.90915862038742e-11	250.746030372124	0.4542250840347
TGGT1_297500:E017	TGGT1_297500	E017	0.0168654196467979	8.41530058864441e-13	7.93702445121737e-11	114.090170350191	0.904194734206921
TGGT1_207460B:E024	TGGT1_207460B	E024	0.01963489816934	8.77468858081195e-13	8.26633001834134e-11	65.4012931258259	1.00063631677726
TGGT1_279350:E002	TGGT1_279350	E002	0.011320390268664	9.15544236812403e-13	8.61497248939969e-11	88.1526970165554	-0.778944589042502
TGGT1_214180:E006	TGGT1_214180	E006	0.00720341025977052	9.48209720141852e-13	8.91195713104219e-11	138.909763107547	0.623323324393782
TGGT1_312905:E021	TGGT1_312905	E021	0.00129713017062624	9.51225148765521e-13	8.92990260297492e-11	798.472837332378	-0.223555710332636
TGGT1_288360:E017	TGGT1_288360	E017	0.00812861424698572	9.65919522729463e-13	9.05731854443243e-11	122.994775385727	0.653236014066863
TGGT1_250840:E030	TGGT1_250840	E030	0.0251696790662395	9.91562500103623e-13	9.28698357840672e-11	39.5450508015113	1.23087088721253
No_genes_on_ref_contig_665+No_genes_on_ref_contig_666+No_genes_on_ref_contig_667+No_genes_on_ref_contig_668+No_genes_on_ref_contig_669:E002	No_genes_on_ref_contig_665+No_genes_on_ref_contig_666+No_genes_on_ref_contig_667+No_genes_on_ref_contig_668+No_genes_on_ref_contig_669	E002	0.0441860856064893	1.01213951781686e-12	9.46872351922878e-11	27.4879676204697	-1.46135817778159
TGGT1_263810:E008	TGGT1_263810	E008	0.0199279313576138	1.01707077339469e-12	9.50384362153013e-11	49.9746430699045	1.05734904786561
TGGT1_282055:E037	TGGT1_282055	E037	0.0983019811702586	1.02784215518013e-12	9.59339149115231e-11	10.1093567054658	3.50802331424724
TGGT1_363340:E008	TGGT1_363340	E008	0.0715045951478662	1.0365631463483e-12	9.66361727718594e-11	13.9008067327759	2.84198911603349
TGGT1_209830:E024	TGGT1_209830	E024	0.0174973452378725	1.03851651714132e-12	9.67066101630965e-11	56.9378838788478	1.44451057498017
TGGT1_233695:E005	TGGT1_233695	E005	0.0164334357439916	1.04713323699668e-12	9.73966611623586e-11	60.6360488320728	0.893966142609832
TGGT1_207630:E004	TGGT1_207630	E004	0.0473524912228639	1.06461040603922e-12	9.89083097026196e-11	20.9988801397604	1.84127572305431
TGGT1_288245:E008	TGGT1_288245	E008	0.05677043468049	1.06922610597193e-12	9.92229536386714e-11	17.5119978519781	2.49580037024993
TGGT1_224210:E008	TGGT1_224210	E008	0.0165038453565843	1.08613155784468e-12	1.00676040554065e-10	60.3765231586054	0.98006267455274
TGGT1_249740:E003	TGGT1_249740	E003	0.00158826952577382	1.12744812259827e-12	1.04385922222444e-10	647.0339220228	-0.0236526989459409
TGGT1_226290:E011	TGGT1_226290	E011	0.00325576824914954	1.13666166537581e-12	1.05118418733237e-10	310.137566553431	0.406273067787706
TGGT1_286770:E002	TGGT1_286770	E002	0.148914053379283	1.15191639309165e-12	1.06407288325234e-10	6.67221702534774	15.7983135028662
TGGT1_206415:E008	TGGT1_206415	E008	0.0727963755894944	1.15629171422458e-12	1.06689384626196e-10	13.6539547906953	2.8465315086751
TGGT1_306350:E029	TGGT1_306350	E029	0.0618947089657685	1.18405387220427e-12	1.09126243575812e-10	16.0609287441134	3.45429851811331
TGGT1_314400:E002	TGGT1_314400	E002	0.0578082767733214	1.20116781467602e-12	1.10577290214217e-10	17.1973122088014	2.70797578752717
TGGT1_217830:E022	TGGT1_217830	E022	0.0558208483382333	1.23487611921889e-12	1.13550937910179e-10	17.8101843310752	15.1294769446394
TGGT1_258080:E020	TGGT1_258080	E020	0.0193400733238513	1.27324070352791e-12	1.16945492831997e-10	51.4978562433863	1.1255004508027
TGGT1_304730:E010	TGGT1_304730	E010	0.0196815753092682	1.31659130764873e-12	1.20789771844342e-10	50.6018761097215	-1.02361987813094
TGGT1_204540:E001	TGGT1_204540	E001	0.0126534603388338	1.35038662374123e-12	1.23749675445798e-10	2007.30481144173	0.30806268030235
TGGT1_260450:E001	TGGT1_260450	E001	0.00794729059499234	1.3683293145122e-12	1.25251776878847e-10	125.81991481077	0.463722269735223
TGGT1_270740:E007	TGGT1_270740	E007	0.0238315747107416	1.4491612646898e-12	1.32500605554622e-10	41.7704106329604	1.11707019877734
TGGT1_295910:E009	TGGT1_295910	E009	0.0128584138070307	1.5986618389905e-12	1.46004483677487e-10	77.5647370957619	0.835954182302984
TGGT1_246160:E008	TGGT1_246160	E008	0.0106556535518269	1.65172968072358e-12	1.50680673190077e-10	93.6795707337476	0.751708143136613
TGGT1_227440:E002	TGGT1_227440	E002	0.00382673646462326	1.65639199587601e-12	1.50935448969582e-10	263.210913708826	-0.325745342654455
TGGT1_250220:E041	TGGT1_250220	E041	0.0253080798118597	1.70481074880672e-12	1.55172374075435e-10	43.0326376032018	1.16161917626046
TGGT1_288340:E007	TGGT1_288340	E007	0.00427462783629061	1.71023905584589e-12	1.55491160105539e-10	322.27902971002	0.428649809298061
TGGT1_293350:E002	TGGT1_293350	E002	0.0365677422178875	1.74105797419728e-12	1.58115090603844e-10	27.2010049947702	1.63577211035544
TGGT1_203030:E015	TGGT1_203030	E015	0.00485426697330229	1.76989782251754e-12	1.60396160696743e-10	206.87799080168	-0.485490072528789
TGGT1_244390:E004	TGGT1_244390	E004	0.0111350019750054	1.77014899586051e-12	1.60396160696743e-10	89.6274121810796	0.772048942075364
TGGT1_272010:E007	TGGT1_272010	E007	0.0148982952886444	1.79892197538094e-12	1.62820589330023e-10	66.9064667075724	0.901964795520877
TGGT1_318300:E001	TGGT1_318300	E001	0.0392369742890247	1.81067781106071e-12	1.63701089670757e-10	25.3480486232919	1.95596939732273
TGGT1_214620:E035	TGGT1_214620	E035	0.0172068289680889	1.87549335937014e-12	1.69371315848712e-10	57.9021927680929	0.979417397485667
TGGT1_209830:E030	TGGT1_209830	E030	0.0132801344762049	1.89991825723318e-12	1.71385363684604e-10	75.0917005781994	1.09746687964677
TGGT1_209040:E006	TGGT1_209040	E006	0.0135136676461529	2.0285977557277e-12	1.82585105695291e-10	73.7888911993273	0.739553035676354
TGGT1_313180:E014	TGGT1_313180	E014	0.0223853479870081	2.02817184705038e-12	1.82585105695291e-10	146.48945070585	0.981243165549622
TGGT1_204330:E010	TGGT1_204330	E010	0.0338345977486158	2.04967850594329e-12	1.84277053649589e-10	29.4017520374561	1.49375089764452
TGGT1_220880:E006	TGGT1_220880	E006	0.0176400134110645	2.0999576616475e-12	1.88587410248177e-10	56.4759905841787	1.05312287799056
TGGT1_213920:E002	TGGT1_213920	E002	0.00212065467748948	2.12220996173312e-12	1.90374023622803e-10	480.416538010566	-0.294340706936022
TGGT1_224830:E013	TGGT1_224830	E013	0.0163575197164724	2.16362461818731e-12	1.93873733129137e-10	60.9183821339556	0.923710178120164
TGGT1_265190:E028	TGGT1_265190	E028	0.0545507962929499	2.18053436724709e-12	1.95172330531812e-10	18.2252460795692	2.04845902582047
TGGT1_240243:E002	TGGT1_240243	E002	0.0296215516860801	2.2237505413663e-12	1.988200442494e-10	33.5910623945471	1.46657165936007
TGGT1_258080:E012	TGGT1_258080	E012	0.0423410123612664	2.22773731548919e-12	1.98956163900465e-10	23.4874336366146	2.12449531284196
TGGT1_318410:E009	TGGT1_318410	E009	0.0151659638713896	2.23798111448999e-12	1.99650171578287e-10	65.7214566042846	0.940768091681304
TGGT1_262530:E023	TGGT1_262530	E023	0.0176672633195902	2.30717587793005e-12	2.05595854861681e-10	56.388619094007	1.04310095860762
TGGT1_315980:E005	TGGT1_315980	E005	0.0280637355254003	2.38127360633204e-12	2.11964856237284e-10	35.4592426503066	1.24165406763206
TGGT1_240610:E007	TGGT1_240610	E007	0.0123279740350561	2.43833469714782e-12	2.16805012967213e-10	80.9166093496694	0.786872389385569
TGGT1_238250:E003	TGGT1_238250	E003	0.00516403867563433	2.48395143844847e-12	2.20618063127764e-10	194.33892433555	0.501457912311529
TGGT1_312905:E019	TGGT1_312905	E019	0.0067660530698861	2.49605121403924e-12	2.21449115126877e-10	147.960062027249	-0.588382136312949
TGGT1_290740:E001	TGGT1_290740	E001	0.0034253738296632	2.53588655818743e-12	2.24736335099081e-10	294.538931499779	-0.0559607313124349
TGGT1_288640:E002	TGGT1_288640	E002	0.00854148903447374	2.54988781313952e-12	2.257293778441e-10	117.012234471567	0.607150759380255
TGGT1_235920:E052	TGGT1_235920	E052	0.0150553251659087	2.67115960261105e-12	2.36205991803728e-10	66.2061442383458	-0.896065105818038
TGGT1_244165:E042	TGGT1_244165	E042	0.0541488961976318	2.70578160655487e-12	2.39005774622765e-10	18.3606492778744	2.20893934107445
TGGT1_272695:E001	TGGT1_272695	E001	0.026281457569094	2.7679379789522e-12	2.44228931946127e-10	37.8687913782126	1.28242266476695
TGGT1_259230:E009	TGGT1_259230	E009	0.0205853749156516	2.77322748857135e-12	2.4442851669193e-10	48.3744456911994	1.10555455171476
TGGT1_235500:E003	TGGT1_235500	E003	0.00292735226549285	2.80391626209857e-12	2.46863881592724e-10	345.575735964113	-0.247238056450594
TGGT1_226290:E010	TGGT1_226290	E010	0.00321931818527327	2.87098883382077e-12	2.52493772874205e-10	313.708055702212	0.394593154961138
TGGT1_214620:E003	TGGT1_214620	E003	0.0619828824489836	2.94902759297957e-12	2.59074801653107e-10	16.0380617062574	2.37733250744715
TGGT1_243200:E010	TGGT1_243200	E010	0.00518739319363254	2.95563106913021e-12	2.5909106880155e-10	341.665286970191	0.45474166607524
TGGT1_312300:E008	TGGT1_312300	E008	0.0361199866533061	2.95254116998554e-12	2.5909106880155e-10	27.538695369313	1.64578487797416
TGGT1_200700:E010	TGGT1_200700	E010	0.00521556432321164	2.99223891432405e-12	2.61920484094788e-10	192.399218224124	-0.497385317364487
TGGT1_305290:E006	TGGT1_305290	E006	0.0215515461534096	2.99764076675028e-12	2.61920484094788e-10	46.2004164823525	1.12373164871967
TGGT1_313690:E002	TGGT1_313690	E002	0.0515992859641965	2.9969073651763e-12	2.61920484094788e-10	19.2688174305097	2.05827271955384
TGGT1_207460A:E004	TGGT1_207460A	E004	0.0154366875746682	3.03214125160961e-12	2.64648566431029e-10	444.859190891658	-0.46218105533548
TGGT1_408560:E009	TGGT1_408560	E009	0.0120058878883111	3.11974598872487e-12	2.7200074773186e-10	83.0970522482243	0.767190968921122
TGGT1_223060:E005	TGGT1_223060	E005	0.0328488454212774	3.13703822842616e-12	2.73213356388335e-10	30.28549312912	2.19754641964021
TGGT1_291840:E005	TGGT1_291840	E005	0.00561588610216959	3.17109771076352e-12	2.75882083705272e-10	178.553062778884	-0.409407570777009
TGGT1_462962:E010	TGGT1_462962	E010	0.00655794892932468	3.1968653710615e-12	2.77824462575511e-10	152.6937076765	-0.493977130552793
TGGT1_321580:E003	TGGT1_321580	E003	0.0149645236248954	3.40075369975823e-12	2.95225645107506e-10	170.514496496493	-0.107311102118837
TGGT1_215990:E010	TGGT1_215990	E010	0.0144391386437735	3.50340727384086e-12	3.03810511550529e-10	69.0419257369714	1.04164483717791
TGGT1_234310:E005	TGGT1_234310	E005	0.0181544633897593	3.54964887859026e-12	3.07434288824528e-10	54.8709038599992	0.948293582705683
TGGT1_280740:E009	TGGT1_280740	E009	0.0806183017559468	3.55281094287836e-12	3.07434288824528e-10	12.328315712396	15.5393444557431
TGGT1_244710:E001	TGGT1_244710	E001	0.0273729709306243	3.63055871918245e-12	3.13825651170444e-10	36.355809595662	-1.16550698530926
TGGT1_235930:E009	TGGT1_235930	E009	0.00276156809525206	3.72112867113174e-12	3.21310506164514e-10	366.729183146951	0.388388427063283
TGGT1_216860:E011	TGGT1_216860	E011	0.00755430283051194	3.75609051211178e-12	3.2398287125571e-10	256.3528136489	0.58512958375785
TGGT1_277550:E008	TGGT1_277550	E008	0.00813367200898104	3.88554323733352e-12	3.34791177445167e-10	122.917789843497	-0.491045520613136
TGGT1_286440:E014	TGGT1_286440	E014	0.004868892519943	3.90974389816306e-12	3.36517242663321e-10	206.249687886673	-0.441260270299962
TGGT1_315690:E008	TGGT1_315690	E008	0.0236905894891107	3.92305700371767e-12	3.37303522039559e-10	42.0195504352532	1.34300594873969
TGGT1_275802:E015	TGGT1_275802	E015	0.0645987157864541	3.92872595638543e-12	3.37431585200827e-10	15.3880877110678	2.38561879676162
TGGT1_220880:E014	TGGT1_220880	E014	0.0211669413536588	3.93386022481327e-12	3.37513501860042e-10	47.0419970886662	1.16755888637233
TGGT1_225220:E047	TGGT1_225220	E047	0.0185209160010549	4.00368250155534e-12	3.43139391468227e-10	70.4584327346674	1.00607923056871
TGGT1_228750:E001	TGGT1_228750	E001	0.0289607266292042	4.12057926874877e-12	3.52783634424637e-10	34.3589533371431	1.31230573563208
TGGT1_311335:E046	TGGT1_311335	E046	0.00298787783512647	4.17209563707609e-12	3.56815827605231e-10	338.448452406916	0.378720621528867
TGGT1_221922:E002	TGGT1_221922	E002	0.00408252796603511	4.30537193439405e-12	3.67824553569633e-10	246.501581570815	-0.475782612613671
TGGT1_215450:E008	TGGT1_215450	E008	0.0299805889012658	4.3397160600413e-12	3.70366782354582e-10	33.1880720797052	1.23035924961689
TGGT1_249810:E038	TGGT1_249810	E038	0.00387100009093836	4.43038846161416e-12	3.7770582095926e-10	592.109298649467	-0.375526575990082
TGGT1_240640:E002	TGGT1_240640	E002	0.00545559649651012	4.67980865681878e-12	3.98548894418e-10	183.8507642511	0.509635228306865
TGGT1_248640:E015	TGGT1_248640	E015	0.0252545529494283	4.73517359059515e-12	4.02839030386406e-10	39.4118696926589	1.2031979462396
TGGT1_305480:E007	TGGT1_305480	E007	0.0238101667271818	4.78436561802916e-12	4.06595534917457e-10	41.8080509963178	1.39055029296754
TGGT1_243545:E006	TGGT1_243545	E006	0.0353055385092194	4.87279521928068e-12	4.13675207180468e-10	28.1749325766254	1.45157129090495
TGGT1_225060:E006	TGGT1_225060	E006	0.013273691940492	4.95338131310077e-12	4.20074832261755e-10	75.1282938868359	-0.897645115712546
TGGT1_225060:E003	TGGT1_225060	E003	0.0277366505552239	4.97575313696555e-12	4.21529306939049e-10	35.878200248558	1.42040192581428
TGGT1_211240:E016	TGGT1_211240	E016	0.0344245546268896	5.00990027833405e-12	4.2397725259046e-10	28.8970941901378	1.38821692494064
TGGT1_313180:E016	TGGT1_313180	E016	0.0217663836111183	5.04697246386266e-12	4.26667352743405e-10	45.7432938680383	1.11653563356697
TGGT1_315780:E015	TGGT1_315780	E015	0.00859728977821611	5.17351726336285e-12	4.36907862194142e-10	116.248035829519	-0.690784442233257
TGGT1_204330:E006	TGGT1_204330	E006	0.0294463739504709	5.25892801571779e-12	4.43656795557968e-10	33.7912588559964	1.24741729604049
TGGT1_306350:E034	TGGT1_306350	E034	0.029736022481801	5.41078711829886e-12	4.55991542793172e-10	1407.86024969693	0.967489310495085
TGGT1_226910:E015	TGGT1_226910	E015	0.0402731666649217	5.50807009641776e-12	4.63705984603012e-10	24.6950032022846	1.93895562748285
TGGT1_262680:E002	TGGT1_262680	E002	0.0168471353484877	5.53964242287389e-12	4.65878157302837e-10	59.1423469366263	1.13188630463674
TGGT1_201230:E016	TGGT1_201230	E016	0.0264469296552737	5.74743029633399e-12	4.82849932335614e-10	37.631377729212	1.2883529542131
TGGT1_241880:E011	TGGT1_241880	E011	0.025910711182561	5.77271743383145e-12	4.84470210000397e-10	38.4117564787848	1.33289656148665
TGGT1_207460A:E002	TGGT1_207460A	E002	0.0145877038195181	5.88258593656069e-12	4.93178167796706e-10	68.3362093858553	0.565205508196205
TGGT1_243960:E023	TGGT1_243960	E023	0.00959114935847439	5.8908511186194e-12	4.93358781184375e-10	104.134906321565	-0.689917555792819
TGGT1_263810:E015	TGGT1_263810	E015	0.0677697822741821	5.93917543965829e-12	4.96890496498251e-10	14.6674863602976	2.38706718089032
TGGT1_253120:E027	TGGT1_253120	E027	0.0974278132468699	6.07823475689354e-12	5.0799822266853e-10	10.2001121549592	-2.33065026314272
TGGT1_221922:E007	TGGT1_221922	E007	0.0319885821029843	6.16370320206637e-12	5.14608663928468e-10	80.0153048583708	-1.13016310064997
TGGT1_224830:E015	TGGT1_224830	E015	0.00609062088504865	6.23371366780144e-12	5.19916191084659e-10	164.513032552837	0.460019238358164
TGGT1_269430:E018	TGGT1_269430	E018	0.0159460201382024	6.44765327557152e-12	5.37204630756725e-10	62.4956927247996	1.30193331774281
TGGT1_319870:E007	TGGT1_319870	E007	0.00601343815425103	6.55817621115123e-12	5.45849851966283e-10	166.643417026561	0.553696927931776
TGGT1_286440:E013	TGGT1_286440	E013	0.00387066788053141	7.05362086509348e-12	5.86464609955605e-10	260.181870262577	-0.376310497454459
TGGT1_321540:E006	TGGT1_321540	E006	0.0318356497387461	7.06067505885735e-12	5.86464609955605e-10	31.2509676729428	1.39750781136408
TGGT1_281440:E016	TGGT1_281440	E016	0.0374853463877661	7.21676930589672e-12	5.98813843691235e-10	26.534204702222	1.87517655658404
TGGT1_289320:E017	TGGT1_289320	E017	0.026136086623961	7.23440059373195e-12	5.99660505066682e-10	268.880386532314	0.968181676212151
TGGT1_296340:E004	TGGT1_296340	E004	0.00935446022714891	7.29107883738122e-12	6.03738717883049e-10	106.784831370263	0.336292909188362
TGGT1_223060:E008	TGGT1_223060	E008	0.0246634810129817	7.36402806909288e-12	6.09154514506366e-10	40.3584360934242	1.59147780917735
TGGT1_224830:E008	TGGT1_224830	E008	0.0132706087218021	7.3967802418075e-12	6.11237515683038e-10	75.1458190494538	0.784766592472702
TGGT1_282055:E013	TGGT1_282055	E013	0.00498305207174324	7.44812202555772e-12	6.14850850443152e-10	201.47359173196	-0.509447714313988
TGGT1_250100:E009	TGGT1_250100	E009	0.0057260870834242	7.52452092965681e-12	6.20523184122413e-10	186.23981064307	0.550328843773032
TGGT1_209830:E028	TGGT1_209830	E028	0.0161105052591195	7.73030125906134e-12	6.36842726683997e-10	61.8555092356369	1.23819170115367
TGGT1_321540:E011	TGGT1_321540	E011	0.0196532621862674	7.87568983340259e-12	6.48158836595064e-10	50.6749727298091	1.02737683145626
TGGT1_251510:E009	TGGT1_251510	E009	0.0225257135389211	7.96157664471813e-12	6.5455996986896e-10	44.1976600681479	1.21778287707832
TGGT1_309600:E015	TGGT1_309600	E015	0.0240131081376214	7.98381404466849e-12	6.55720474970814e-10	41.4539348455767	1.10086893028171
TGGT1_263090:E008	TGGT1_263090	E008	0.00017640586758477	8.04795565395399e-12	6.60316768010138e-10	8062.59837578601	-0.0595539508376874
TGGT1_203400:E004	TGGT1_203400	E004	0.00868546912534564	8.06488918840330e-12	6.61034343782478e-10	115.060550296924	0.599030365941062
TGGT1_260830:E015	TGGT1_260830	E015	0.0264268434149474	8.45980001892004e-12	6.92699751042099e-10	37.6600379085666	0.85240985442312
TGGT1_219650:E025	TGGT1_219650	E025	0.0101634750026066	8.49469987995154e-12	6.9485267964325e-10	118.782764287465	-0.664836486775853
TGGT1_213410:E005	TGGT1_213410	E005	0.00648300695890909	8.74600504981886e-12	7.14684936940411e-10	154.473418259627	0.55214656496896
TGGT1_290900:E009	TGGT1_290900	E009	0.0584775868129311	8.76734880337745e-12	7.15704656866207e-10	17.0002996689731	1.99496025479636
TGGT1_262700:E002	TGGT1_262700	E002	0.046138720815044	8.81363359293995e-12	7.1875627083435e-10	21.551935147361	2.31198654349896
TGGT1_300010:E018	TGGT1_300010	E018	0.00290584107116663	8.94722897234278e-12	7.28914763957713e-10	348.181667755548	-0.279291122793095
TGGT1_257100:E005	TGGT1_257100	E005	0.0237919688613554	8.96482851161289e-12	7.29612328513172e-10	41.8401005863454	0.879245117075366
TGGT1_270740:E011	TGGT1_270740	E011	0.0104032769729764	9.03227420403184e-12	7.3436118616567e-10	95.9638596126571	0.632357444985743
TGGT1_304955:E006	TGGT1_304955	E006	0.0025372745113667	9.11290938062352e-12	7.40171769461409e-10	471.764816798375	0.312423665147734
TGGT1_285240:E014	TGGT1_285240	E014	0.0233755853357155	9.13546423151699e-12	7.4125799470505e-10	42.5870885195121	1.15705821752808
TGGT1_289350:E001	TGGT1_289350	E001	0.0836100474902793	9.23051193659195e-12	7.48218254217621e-10	27.5855241367432	2.39538484065664
TGGT1_225080:E002	TGGT1_225080	E002	0.0274231406636538	9.24897403317604e-12	7.48802158261905e-10	36.2891685189173	1.27713356628649
TGGT1_311230:E007	TGGT1_311230	E007	0.0253067017367287	9.25626498972417e-12	7.48802158261905e-10	155.209207619245	0.947914723693634
TGGT1_227995:E001	TGGT1_227995	E001	0.0338644015366721	9.4156440987566e-12	7.60932959272386e-10	29.3758350644829	1.67942005349271
TGGT1_233490:E001	TGGT1_233490	E001	0.00572563603251547	9.45412409708285e-12	7.63278708977984e-10	175.098419875892	-0.519862068171786
TGGT1_281440:E017	TGGT1_281440	E017	0.0441165269788316	9.55530728637139e-12	7.70677056708486e-10	22.5410162961665	2.1705435009468
TGGT1_210790:E020	TGGT1_210790	E020	0.012853457170265	9.59758140377483e-12	7.73314106420919e-10	77.5947724847299	0.803114958237115
TGGT1_206550:E033	TGGT1_206550	E033	0.00781856159840354	1.00291546528658e-11	8.0728195503402e-10	127.905677874378	0.92749052476663
TGGT1_249810:E033	TGGT1_249810	E033	0.0035439088964985	1.01172978993016e-11	8.13565782769037e-10	284.537137803292	-0.413947269232456
TGGT1_273500:E012	TGGT1_273500	E012	0.0409499085122689	1.02429343967378e-11	8.22849063204605e-10	24.2863603270209	1.67586421498178
TGGT1_312100:E004	TGGT1_312100	E004	0.00323467970360287	1.03862985283685e-11	8.33536592135023e-10	312.193334103624	-0.381374548929755
TGGT1_293590:E002	TGGT1_293590	E002	0.0195893571246936	1.04273794189439e-11	8.36002460167268e-10	50.840736644153	1.00157412962791
TGGT1_203540:E016	TGGT1_203540	E016	0.00233559688559325	1.05782259012144e-11	8.47255027911255e-10	435.173526929326	-0.313557716359349
TGGT1_286790:E013	TGGT1_286790	E013	0.0277984385282158	1.06265761437603e-11	8.50284068351322e-10	35.7983003215726	1.28247481094971
TGGT1_260830:E014	TGGT1_260830	E014	0.0289279497760721	1.08569321567061e-11	8.67855859080862e-10	34.3979555447243	0.910154025271521
TGGT1_306440:E031	TGGT1_306440	E031	0.0202112251489814	1.1003289291939e-11	8.78685025701971e-10	49.2723164719782	-0.986883585548169
TGGT1_221818:E001	TGGT1_221818	E001	0.00524641626967546	1.18486008487757e-11	9.45253744590814e-10	191.256206232432	-0.562449825725342
TGGT1_204540:E005	TGGT1_204540	E005	0.0134828795016569	1.20676911108333e-11	9.61781877426581e-10	103.3779850145	-0.470418071832496
TGGT1_271610:E002	TGGT1_271610	E002	0.0347772003293116	1.22991145741035e-11	9.79259383767504e-10	28.6036245257279	1.47142303926925
TGGT1_207470:E007	TGGT1_207470	E007	0.0105366833334259	1.2506355829434e-11	9.94778953585566e-10	94.7426807194389	0.605070997331604
TGGT1_308040:E008	TGGT1_308040	E008	0.0333739832680527	1.26858304888331e-11	1.00806153987789e-09	29.8081914379489	1.49362072240599
TGGT1_237090:E006	TGGT1_237090	E006	0.0373094828695116	1.33214973379593e-11	1.05753302613583e-09	26.6594560750392	1.41087418037265
TGGT1_312390:E004	TGGT1_312390	E004	0.0233391440162502	1.3351006827404e-11	1.05883451494152e-09	42.6537351949324	1.0445486543466
TGGT1_207630:E009	TGGT1_207630	E009	0.0424715569955113	1.37818428145128e-11	1.09193040199185e-09	23.4151498473613	1.59918066329303
TGGT1_309110:E005	TGGT1_309110	E005	0.00872866035672132	1.38086544533757e-11	1.09298207577773e-09	114.487714307538	-0.629392122988648
TGGT1_233680:E011	TGGT1_233680	E011	0.0250880534895749	1.41619200410658e-11	1.11984585163119e-09	39.6739866316339	1.10867940853054
TGGT1_288640:E019	TGGT1_288640	E019	0.0059369759425419	1.42613482907644e-11	1.12660465191278e-09	168.809026090174	0.441646292743427
TGGT1_207630:E016	TGGT1_207630	E016	0.0451742401512817	1.44043928606154e-11	1.13679243167329e-09	22.0126167260252	1.64434416159616
TGGT1_311230:E006	TGGT1_311230	E006	0.000791528550735446	1.45000220332621e-11	1.14322195200724e-09	1345.2725164527	0.145085548436597
TGGT1_315690:E012	TGGT1_315690	E012	0.0153111223154704	1.48331104594068e-11	1.16834260774655e-09	65.0962054014996	-0.86294071415941
TGGT1_210440:E006	TGGT1_210440	E006	0.0409627196856004	1.53856862324132e-11	1.21068555358078e-09	24.2787548382615	1.80072815443928
TGGT1_320300:E007	TGGT1_320300	E007	0.015669193198251	1.57861156282423e-11	1.2409854384091e-09	63.6035639112601	0.906718425140562
TGGT1_273070:E021	TGGT1_273070	E021	0.0393162926699879	1.58028363525078e-11	1.24109143280128e-09	25.2968410680242	1.59576478618551
TGGT1_219620:E005	TGGT1_219620	E005	0.0363108957324332	1.60543824365908e-11	1.25962154131989e-09	27.393694724287	1.5678530572088
TGGT1_269417:E003	TGGT1_269417	E003	0.0050156968605195	1.60955151015997e-11	1.26162272983267e-09	200.148233951706	0.454580282023825
TGGT1_288390:E007	TGGT1_288390	E007	0.035486806518135	1.62364676170927e-11	1.27143667610667e-09	28.030797764714	1.81253722812118
TGGT1_216290A:E017	TGGT1_216290A	E017	0.0354607319247429	1.63531626018035e-11	1.27933389792307e-09	28.051440038862	1.7945614724913
TGGT1_258080:E027	TGGT1_258080	E027	0.02860193780673	1.66642808890887e-11	1.30241114964238e-09	34.7907628037236	1.37564781039148
TGGT1_207480:E066	TGGT1_207480	E066	0.0332518069582892	1.69890023355885e-11	1.32650590286629e-09	29.9178905157289	1.81105058818329
TGGT1_359210:E013	TGGT1_359210	E013	0.00313586082012807	1.71003449609792e-11	1.33390951731851e-09	322.201167240793	-0.365800060702948
No_genes_on_ref_contig_697+No_genes_on_ref_contig_704+No_genes_on_ref_contig_703+No_genes_on_ref_contig_702+No_genes_on_ref_contig_701+No_genes_on_ref_contig_700+No_genes_on_ref_contig_699+No_genes_on_ref_contig_698:E003	No_genes_on_ref_contig_697+No_genes_on_ref_contig_704+No_genes_on_ref_contig_703+No_genes_on_ref_contig_702+No_genes_on_ref_contig_701+No_genes_on_ref_contig_700+No_genes_on_ref_contig_699+No_genes_on_ref_contig_698	E003	0.0214830513674533	1.73585664414467e-11	1.3527450402029e-09	46.3480838609561	-0.911852094434761
TGGT1_240810:E007	TGGT1_240810	E007	0.00136049153022483	1.78557441907998e-11	1.39014803012943e-09	863.936719970267	-0.166175043653828
TGGT1_275750:E003	TGGT1_275750	E003	0.00457363354342127	1.85127328480726e-11	1.43990894652133e-09	219.721246398366	0.435727729757699
TGGT1_285490:E009	TGGT1_285490	E009	0.0259893527475469	1.86926749310265e-11	1.45250539995806e-09	38.2952872970906	1.20960466420045
TGGT1_287160:E002	TGGT1_287160	E002	0.00966241714234805	1.93549621969316e-11	1.50252199323969e-09	103.362577409463	-0.699370265779859
TGGT1_277920:E003	TGGT1_277920	E003	0.0859033024193114	1.94135091414025e-11	1.50561927044297e-09	11.5693746407557	2.35193672205113
TGGT1_236570:E002	TGGT1_236570	E002	0.0184467307549552	1.94619592503521e-11	1.50792829182071e-09	53.9990218646008	0.99789250826039
TGGT1_249260:E005	TGGT1_249260	E005	0.0252400424926444	1.97747611871578e-11	1.53069544050353e-09	39.4345753808172	1.11999448473417
TGGT1_202460:E011	TGGT1_202460	E011	0.0554536436388387	1.98516087621866e-11	1.53517206265818e-09	17.9282336610508	1.95483303063529
TGGT1_210255:E002	TGGT1_210255	E002	0.00127946753584589	1.98715327960258e-11	1.53524229692549e-09	809.973848107934	0.104002174204771
TGGT1_320515:E004	TGGT1_320515	E004	0.0679052508545613	1.99379333941613e-11	1.53889966785623e-09	14.6382022930743	3.05197744710297
TGGT1_310300:E024	TGGT1_310300	E024	0.0259023202837888	2.03908361387351e-11	1.57235353931306e-09	38.4242253502237	1.4544745913668
TGGT1_211260:E001	TGGT1_211260	E001	0.000289417717379731	2.04723165080625e-11	1.57713022259392e-09	4205.01214645901	-0.00745986775853563
TGGT1_309980:E040	TGGT1_309980	E040	0.00456917546009653	2.07597921593014e-11	1.59775197328999e-09	219.938151708514	-0.456292630011645
TGGT1_249260:E007	TGGT1_249260	E007	0.0434853641581337	2.16342711054383e-11	1.66346940733101e-09	22.8685858955029	1.56729067354702
TGGT1_307270:E008	TGGT1_307270	E008	0.00955489704752915	2.17389882367949e-11	1.6699307471909e-09	104.532218220051	0.536550498975188
TGGT1_214150:E003	TGGT1_214150	E003	0.0186636070944335	2.18439810553089e-11	1.67640096055168e-09	53.3697438430046	1.00396991257731
TGGT1_258080:E016	TGGT1_258080	E016	0.00912849482557623	2.22028578859164e-11	1.70232453126255e-09	109.443667237276	0.63045516607274
TGGT1_217020:E011	TGGT1_217020	E011	0.0124755646453952	2.22278146022411e-11	1.70262107392025e-09	79.9552346583097	0.709318549724294
TGGT1_211020:E011	TGGT1_211020	E011	0.00872940529590914	2.30456143647624e-11	1.76359021397071e-09	114.477884371801	-0.638969125333139
TGGT1_270000:E033	TGGT1_270000	E033	0.0509059958915325	2.34962186763481e-11	1.79637046859371e-09	19.5315145695807	2.50556823225833
TGGT1_237020:E019	TGGT1_237020	E019	0.044740176697021	2.35958911302973e-11	1.80228407796079e-09	22.2264346332527	1.69292080013392
TGGT1_236050:E002	TGGT1_236050	E002	0.0223762787986367	2.37141975223063e-11	1.80960844703535e-09	44.4935274346508	1.02211146303959
TGGT1_294700:E012	TGGT1_294700	E012	0.00766201906572804	2.39388732669862e-11	1.82502826554309e-09	130.537192730513	0.652539256355583
TGGT1_290650:E017	TGGT1_290650	E017	0.00784268686104822	2.43001419120278e-11	1.85082260119581e-09	127.509533122148	0.655438236400956
TGGT1_290650:E001	TGGT1_290650	E001	0.00260035913397847	2.44372423075515e-11	1.85951061046199e-09	389.939510787457	-0.307803740797524
TGGT1_318170:E006	TGGT1_318170	E006	0.0683356498579385	2.47224007725435e-11	1.87943787793908e-09	14.5459345265885	2.10416957771997
TGGT1_266920:E009	TGGT1_266920	E009	0.000775093923423306	2.48458342218211e-11	1.88704461514461e-09	1375.89964390687	0.171484517440351
TGGT1_250720:E011	TGGT1_250720	E011	0.0046816820614221	2.49280850918314e-11	1.89151217094832e-09	214.591997561211	-0.476865835963683
TGGT1_266640:E018	TGGT1_266640	E018	0.0114321042089661	2.56371781288013e-11	1.94349068190495e-09	87.2872447155842	0.734262845362036
TGGT1_238230:E023	TGGT1_238230	E023	0.0307314530034542	2.60712899843597e-11	1.97454558807437e-09	32.3757786026451	-1.25214371535299
TGGT1_222930:E009	TGGT1_222930	E009	0.017599681545187	2.63306444326083e-11	1.99110577622465e-09	56.6058048792184	0.889897621487458
TGGT1_226850:E022	TGGT1_226850	E022	0.0215346581082432	2.63392700688416e-11	1.99110577622465e-09	46.2367378200948	-1.00791797292567
TGGT1_263060:E023	TGGT1_263060	E023	0.0220358898392779	2.64644626955282e-11	1.99869821863748e-09	46.0652188355508	1.10794629812643
TGGT1_270540:E015	TGGT1_270540	E015	0.0281744304118325	2.66469606959875e-11	2.0106003474678e-09	35.3196627318639	1.70642068192939
TGGT1_202760:E006	TGGT1_202760	E006	0.0382993103702415	2.69153981721722e-11	2.02895861011235e-09	25.9694964048227	1.88551374486008
TGGT1_305990:E021	TGGT1_305990	E021	0.00380526370353985	2.74227533929201e-11	2.0652761149043e-09	280.223220002328	-0.368213595536771
TGGT1_315160:E003	TGGT1_315160	E003	0.00895477399090691	2.8129448709433e-11	2.11652473583977e-09	111.579545571534	0.626934921680577
TGGT1_211240:E021	TGGT1_211240	E021	0.0513968784801479	2.8782564754474e-11	2.16365024716244e-09	19.3447791491567	1.72113797445821
TGGT1_261050:E002	TGGT1_261050	E002	0.0121510690970456	3.01113711733557e-11	2.2614340015636e-09	82.0998397495129	0.807690456617396
TGGT1_269425:E004	TGGT1_269425	E004	0.00741808013818067	3.018794276118e-11	2.2650776568995e-09	134.860843711404	0.548779085776889
TGGT1_252295:E001	TGGT1_252295	E001	0.00576213850546721	3.07235627265980e-11	2.30312612509925e-09	1004.34551103002	-0.185449688859906
TGGT1_270530:E002	TGGT1_270530	E002	0.0278356869257287	3.17205486869003e-11	2.37565723398599e-09	35.7503049752996	1.2220813251168
TGGT1_227440:E018	TGGT1_227440	E018	0.0520921710709351	3.19680687149992e-11	2.39197592929144e-09	19.0863135141342	2.0634861117245
TGGT1_228160:E013	TGGT1_228160	E013	0.0156817092141975	3.22903649071493e-11	2.41385426923953e-09	63.5526272534207	1.44745455237768
TGGT1_207400:E018	TGGT1_207400	E018	0.00259935960454971	3.31058317832392e-11	2.47252481870473e-09	390.092587773929	-0.0329168727589131
TGGT1_201260:E007	TGGT1_201260	E007	0.00468137941459694	3.40135179656531e-11	2.53562453643306e-09	214.606030251618	-0.49495815912738
TGGT1_266640:E011	TGGT1_266640	E011	0.0105002785173343	3.4001580403166e-11	2.53562453643306e-09	95.0728299652241	0.698475267435121
TGGT1_294860:E001	TGGT1_294860	E001	0.00383529835928548	3.43167185744599e-11	2.55586741153969e-09	718.096329096798	-0.226559458431347
TGGT1_321540:E009	TGGT1_321540	E009	0.0255525926185	3.43871188520629e-11	2.55875026776157e-09	38.9512191953112	1.15783884717856
TGGT1_200350:E014	TGGT1_200350	E014	0.00495924474826499	3.52721258504497e-11	2.62218699865198e-09	202.451275934081	0.451743877617445
TGGT1_211270:E019	TGGT1_211270	E019	0.00380051100219263	3.53107049845036e-11	2.62264007996679e-09	340.65650199573	-0.3883472153718
TGGT1_269910:E004	TGGT1_269910	E004	0.0202682141537292	3.58296776574165e-11	2.65873991330103e-09	49.1334106837075	1.05863912044496
TGGT1_259230:E007	TGGT1_259230	E007	0.0631438417289713	3.60567115082989e-11	2.67313003087467e-09	15.7429380439868	2.60063534076273
TGGT1_319540:E007	TGGT1_319540	E007	0.0495831800252284	3.69910007434867e-11	2.73987930736275e-09	20.0531502659564	-1.6678956239705
TGGT1_283730:E016	TGGT1_283730	E016	0.0194711681055743	3.83530356165674e-11	2.8381597896458e-09	51.1501831145799	0.985615887909333
TGGT1_250830:E006	TGGT1_250830	E006	0.001758163739325	3.86674196929684e-11	2.85880414735513e-09	582.558451200715	0.202945324691479
TGGT1_221870:E011	TGGT1_221870	E011	0.00905569893262739	3.987472556835e-11	2.94536685156517e-09	110.328650790298	0.638519806386866
TGGT1_311060:E022	TGGT1_311060	E022	0.0480404882530942	4.0003687317223e-11	2.95219167783912e-09	20.6978176612291	1.91080992934181
TGGT1_313990:E002	TGGT1_313990	E002	0.0225517314858886	4.08448672666478e-11	3.01151630938156e-09	44.1465485906967	1.48015674531782
TGGT1_293060:E010	TGGT1_293060	E010	0.0157414579228024	4.10951314768895e-11	3.0272038684185e-09	63.3105869162148	0.871201280123242
TGGT1_206695:E003	TGGT1_206695	E003	0.0116026534442184	4.12134398723108e-11	3.03315138385689e-09	231.300988939657	0.603776299864262
TGGT1_262680:E003	TGGT1_262680	E003	0.0114435909032393	4.13213059365477e-11	3.03832025026155e-09	87.1992193531748	0.801733571296868
TGGT1_215690:E018	TGGT1_215690	E018	0.0188471703067603	4.14268503128315e-11	3.04330915378203e-09	52.8484740042464	0.947369733541797
TGGT1_297060:E012	TGGT1_297060	E012	0.0356508423778978	4.147246006737e-11	3.04389005776283e-09	28.1747524936633	1.41236834740336
TGGT1_210690:E003	TGGT1_210690	E003	0.000151337033439624	4.15506468060788e-11	3.04685873741033e-09	10122.4990887311	-0.0348695643017403
TGGT1_266010:E053	TGGT1_266010	E053	0.0118385364530636	4.21206899154416e-11	3.08585653386858e-09	84.2770295607432	0.769023957873371
TGGT1_310630:E011	TGGT1_310630	E011	0.0929698155049373	4.23945388790437e-11	3.10310344188539e-09	10.6894980893592	3.20241831902464
TGGT1_249180:E004	TGGT1_249180	E004	0.00121442672777697	4.24957610669376e-11	3.10769499070581e-09	855.341449804121	0.200186982736618
TGGT1_268280:E023	TGGT1_268280	E023	0.00562146638728456	4.26901685205289e-11	3.11908665656552e-09	178.37412381272	0.492440114533108
TGGT1_300250:E005	TGGT1_300250	E005	0.0475025802466287	4.30858947255748e-11	3.14515344545143e-09	20.9324577238033	1.5623986593175
TGGT1_202690:E009	TGGT1_202690	E009	0.0317574759636086	4.31786345676373e-11	3.14907593660181e-09	31.328023756549	1.25341416289379
TGGT1_290040:E001	TGGT1_290040	E001	0.00353636590114544	4.49444691603387e-11	3.27490227225627e-09	285.153322079889	-0.309385861211265
TGGT1_250720:E028	TGGT1_250720	E028	0.0144376824131419	4.51722112071493e-11	3.28852882940414e-09	158.614064585596	-0.753608734846912
TGGT1_290650:E019	TGGT1_290650	E019	0.00580899145328586	4.53386594878219e-11	3.29767267905342e-09	172.562636097187	0.530058873266061
TGGT1_214220:E001	TGGT1_214220	E001	0.00381065303198455	4.60364959060639e-11	3.34277387534665e-09	264.337568598943	0.417097416618742
TGGT1_261022:E017	TGGT1_261022	E017	0.0690986632031798	4.604155012554e-11	3.34277387534665e-09	14.3851890671167	2.33432600853769
TGGT1_269910:E006	TGGT1_269910	E006	0.018792943035134	4.69318648908938e-11	3.40435230185652e-09	53.0014019803666	1.00582193791513
TGGT1_203170:E019	TGGT1_203170	E019	0.00915598724665034	4.77411307615029e-11	3.45994631241466e-09	109.113122698132	0.639490256531104
TGGT1_253020:E017	TGGT1_253020	E017	0.0140908723601383	4.77948711787604e-11	3.4607344615401e-09	70.7548166911016	0.789375847520596
TGGT1_294785:E001	TGGT1_294785	E001	0.0332124423320832	4.93100802792975e-11	3.56724850479309e-09	29.9534072240837	1.39418033659574
TGGT1_233080:E007	TGGT1_233080	E007	0.0287133896334152	4.93731645132272e-11	3.56861453623581e-09	34.6554707398113	1.19889452348715
TGGT1_257100:E002	TGGT1_257100	E002	0.0816338402479851	5.00005875758593e-11	3.61073116094544e-09	12.1748493809365	2.49960244005071
TGGT1_260450:E005	TGGT1_260450	E005	0.0430357012041346	5.0583974148082e-11	3.6495953108538e-09	23.107826502404	1.79731767687662
TGGT1_316150:E014	TGGT1_316150	E014	0.059937464268367	5.07510638167739e-11	3.65511787444e-09	16.5858608997028	1.87457206067811
TGGT1_329600+after_last_TGGT1_329600:E010	TGGT1_329600+after_last_TGGT1_329600	E010	0.0777705786820949	5.07503110485468e-11	3.65511787444e-09	27.1976983428005	-1.31463299528577
No_genes_on_ref_contig_772+No_genes_on_ref_contig_755+No_genes_on_ref_contig_756+No_genes_on_ref_contig_757+No_genes_on_ref_contig_751+No_genes_on_ref_contig_752+No_genes_on_ref_contig_773+No_genes_on_ref_contig_754+No_genes_on_ref_contig_758+No_genes_on_ref_contig_759+No_genes_on_ref_contig_771+No_genes_on_ref_contig_770+No_genes_on_ref_contig_774+No_genes_on_ref_contig_753+No_genes_on_ref_conti…	No_genes_on_ref_contig_772+No_genes_on_ref_contig_755+No_genes_on_ref_contig_756+No_genes_on_ref_contig_757+No_genes_on_ref_contig_751+No_genes_on_ref_contig_752+No_genes_on_ref_contig_773+No_genes_on_ref_contig_754+No_genes_on_ref_contig_758+No_genes_on_ref_contig_759+No_genes_on_ref_contig_771+No_genes_on_ref_contig_770+No_genes_on_ref_contig_774+No_genes_on_ref_contig_753+No_genes_on_ref_conti…	E010	0.0176394431073949	5.20456533308086e-11	3.74501410130377e-09	56.4778220437729	1.41357746974273
TGGT1_270000:E004	TGGT1_270000	E004	0.0212567441271763	5.21902456873361e-11	3.75207434155573e-09	46.8427612940044	-1.00360964686917
TGGT1_250680:E001	TGGT1_250680	E001	0.0646448208559418	5.28937220503403e-11	3.79926570261052e-09	15.3771037936858	2.97931403689945
TGGT1_249820:E014	TGGT1_249820	E014	0.100830387019855	5.31452464038416e-11	3.8139390830348e-09	9.85572231260265	14.072205349369
TGGT1_228460:E012	TGGT1_228460	E012	0.0343805913325659	5.37582984936288e-11	3.85450819616618e-09	28.9341028876657	1.36306508913912
TGGT1_288400:E004	TGGT1_288400	E004	0.0193462091129485	5.512380821058e-11	3.9489091888919e-09	51.4814782775519	1.00880373829605
TGGT1_306430:E012	TGGT1_306430	E012	0.00572667901940333	5.53000906712498e-11	3.95802554994978e-09	175.066230479425	-0.502717129576635
TGGT1_315780:E022	TGGT1_315780	E022	0.0397680655346592	5.54878392480018e-11	3.96794570565759e-09	25.0090790233283	1.40972186897653
TGGT1_289690:E001	TGGT1_289690	E001	0.0494960089532091	5.56209297387165e-11	3.97394315261529e-09	20.0885053601076	1.82576711945881
TGGT1_291810:E004	TGGT1_291810	E004	0.0168332850059356	5.69597616736009e-11	4.06600031716903e-09	59.1911632886753	0.850766910912242
TGGT1_216680:E024	TGGT1_216680	E024	0.00336318150646956	5.70344508226698e-11	4.06773532435357e-09	751.819477110796	0.259523329752248
TGGT1_288800:E014	TGGT1_288800	E014	0.0239401291480188	5.71455460113207e-11	4.0720614803389e-09	41.5805843728525	1.08185486565008
TGGT1_226710:E014	TGGT1_226710	E014	0.00356638182177322	5.73350971429837e-11	4.08196566828817e-09	709.1653274688	-0.336149778166675
TGGT1_321685:E007	TGGT1_321685	E007	0.0126216056623641	5.79318775416953e-11	4.12081950073020e-09	79.0261781972052	0.988792388561908
TGGT1_253430:E012	TGGT1_253430	E012	0.00173739744704749	5.81787869468867e-11	4.13473975718037e-09	946.68146731942	-0.262293521061092
TGGT1_215230:E011	TGGT1_215230	E011	0.0351879501348163	5.87450007002195e-11	4.17130838305385e-09	28.8195307746843	1.41841508801102
TGGT1_306350:E018	TGGT1_306350	E018	0.00630148779206688	5.90948171068776e-11	4.1924605088961e-09	158.961040812245	-0.187640348302956
TGGT1_230190:E002	TGGT1_230190	E002	0.0108123303825031	6.00206065779432e-11	4.25440181920127e-09	92.3153861470855	-0.72367737761751
TGGT1_202310:E004	TGGT1_202310	E004	0.00856982090821276	6.1676786275024e-11	4.36796082448602e-09	116.622974218019	-0.59575626949105
TGGT1_309980:E083	TGGT1_309980	E083	0.00733428276577536	6.21602241781988e-11	4.39833978880533e-09	136.412949253029	0.583812603559065
TGGT1_230190:E010	TGGT1_230190	E010	0.0702393899662137	6.2845468083664e-11	4.44293245686043e-09	14.1513884594956	2.17814893534197
TGGT1_228770:E001	TGGT1_228770	E001	0.05009715673225	6.38232175812475e-11	4.50810802399126e-09	19.847194221072	1.75242218883561
TGGT1_289580:E021	TGGT1_289580	E021	0.0114268253772385	6.40612158372125e-11	4.52096351452566e-09	87.3277573316379	-0.703690240897066
TGGT1_234310:E003	TGGT1_234310	E003	0.0222632396427143	6.4508944503458e-11	4.54858483361282e-09	44.7199797260636	0.997776034114488
TGGT1_226970:E001	TGGT1_226970	E001	0.000349265494926323	6.53040587361118e-11	4.60063104891797e-09	8074.14565080924	0.0833591924256168
TGGT1_235680:E033	TGGT1_235680	E033	0.00591160313366408	6.59196637472034e-11	4.63995122286876e-09	169.540141827699	-0.511211610628466
TGGT1_249770:E011	TGGT1_249770	E011	0.00413514220152159	6.88181679448118e-11	4.83975155838361e-09	308.275909976752	0.385173053609331
TGGT1_229140:E007	TGGT1_229140	E007	0.00814439417853048	6.91232399432554e-11	4.85697543674388e-09	122.754903138222	0.590537202503384
TGGT1_226950:E017	TGGT1_226950	E017	0.00240667038920966	7.0324436686951e-11	4.93708121384434e-09	509.781660276441	-0.237039668444376
TGGT1_409620:E008	TGGT1_409620	E008	0.00193128179286138	7.04215205476718e-11	4.93960161721658e-09	528.858854371329	-0.268926260001554
TGGT1_319540:E031	TGGT1_319540	E031	0.0204273971014785	7.04952349657709e-11	4.94047985673743e-09	48.7495326254656	1.03975599646146
TGGT1_307570:E001	TGGT1_307570	E001	0.00393727260980557	7.25523326261959e-11	5.08023640466256e-09	342.39786653118	0.354556294326784
TGGT1_205130:E021	TGGT1_205130	E021	0.00509560971376613	7.31902328173063e-11	5.12046225867004e-09	196.976245247719	0.479675591515024
TGGT1_230980:E017	TGGT1_230980	E017	0.0253795914065304	7.32917776496812e-11	5.12312698575499e-09	39.2172899604522	1.11780668968798
TGGT1_214620:E019	TGGT1_214620	E019	0.0318601259175805	7.38934380230883e-11	5.16071515466612e-09	31.2269193051086	1.30094499923771
TGGT1_251640:E020	TGGT1_251640	E020	0.0211372698813345	7.53320653775e-11	5.25664157152331e-09	47.108199030245	1.00713240188116
TGGT1_220110:E002	TGGT1_220110	E002	0.0433922312566269	7.65804553323496e-11	5.33913908571437e-09	22.9177290921522	1.68441684744701
TGGT1_300010:E022	TGGT1_300010	E022	0.0278661809716506	7.66957587356365e-11	5.34256434988923e-09	66.531984251727	1.04938269088831
TGGT1_200290:E002	TGGT1_200290	E002	0.0116533573342168	7.68820301343739e-11	5.35092301974024e-09	99.6700707801137	-0.753926748937903
TGGT1_262630:E010	TGGT1_262630	E010	0.0131331260048391	7.93632303101412e-11	5.5188547795773e-09	75.9356754958276	0.699931328541265
TGGT1_235920:E060	TGGT1_235920	E060	0.0284894661941319	8.02579689566774e-11	5.57627119080667e-09	34.9283679079705	-1.18540269825712
TGGT1_200350:E005	TGGT1_200350	E005	0.00457633874412403	8.04330178074639e-11	5.58362828261874e-09	510.359445015671	-0.399442727535039
TGGT1_244110:E022	TGGT1_244110	E022	0.00956422306442615	8.07194458210949e-11	5.59869798828702e-09	104.429719167201	0.665990339056439
TGGT1_232830:E007	TGGT1_232830	E007	0.0059067522106069	8.12754219425014e-11	5.62759107249387e-09	169.680642565941	-0.502036504580136
TGGT1_266940:E005	TGGT1_266940	E005	0.0227746530971145	8.12244789949716e-11	5.62759107249387e-09	76.0727820877295	1.03739846498045
TGGT1_320740:E004	TGGT1_320740	E004	0.0274769821559219	8.33680795939667e-11	5.76754233592023e-09	36.2179214493918	1.18459897509162
TGGT1_253120:E029	TGGT1_253120	E029	0.0671820435919425	8.3764136316003e-11	5.7899807752333e-09	14.795905839563	-1.8047150650788
TGGT1_271300:E008	TGGT1_271300	E008	0.0354125750955701	8.41098185055944e-11	5.80890179388295e-09	28.0896440231529	1.55333908429108
TGGT1_290920:E005	TGGT1_290920	E005	0.0220581747063391	8.42276910975042e-11	5.81207063312564e-09	45.136726689684	1.16363566331056
TGGT1_305990:E001	TGGT1_305990	E001	0.000539787034916343	8.51583030613048e-11	5.86777494133272e-09	2041.28768859055	0.156562402044465
TGGT1_305990:E023	TGGT1_305990	E023	0.00540390095239817	8.51803088033931e-11	5.86777494133272e-09	196.966339486668	-0.437628201579147
TGGT1_263680:E009	TGGT1_263680	E009	0.0195493139972493	8.5435980830587e-11	5.88036991675826e-09	50.9451586715305	0.93557774236662
TGGT1_249820:E018	TGGT1_249820	E018	0.0499926518701868	8.60611527939791e-11	5.91331674112502e-09	19.8887270948645	1.75421424513929
TGGT1_253890:E021	TGGT1_253890	E021	0.00461223385648282	8.6049090740917e-11	5.91331674112502e-09	217.860909623235	-0.429986504029054
TGGT1_309980:E056	TGGT1_309980	E056	0.00559939733496607	8.69247081440673e-11	5.96757339456741e-09	201.092291698436	-0.482386649822225
TGGT1_226910:E025	TGGT1_226910	E025	0.0333613079595809	8.79479365966227e-11	6.03269045125602e-09	29.819534868247	1.49696346616101
TGGT1_308000:E005	TGGT1_308000	E005	0.0826853951777705	9.13152588867529e-11	6.25304277033248e-09	12.0199155163498	2.72171442030555
TGGT1_313480:E033	TGGT1_313480	E033	0.0712226641345586	9.12390147467192e-11	6.25304277033248e-09	13.9558734590356	2.62788040837221
TGGT1_273100:E016	TGGT1_273100	E016	0.00507126688612322	9.22694446319564e-11	6.3130284850517e-09	197.931787296231	-0.385170525185855
TGGT1_205150:E025	TGGT1_205150	E025	0.00226304058989456	9.24762923922547e-11	6.32182342615469e-09	449.46179975605	-0.345160005282785
TGGT1_255635:E013	TGGT1_255635	E013	0.00589004336783318	9.29687606449999e-11	6.35011242865826e-09	170.166380264875	-0.462611576005125
TGGT1_222245:E001	TGGT1_222245	E001	0.00216884416021287	9.4923717545293e-11	6.47816258327914e-09	469.473678102825	-0.178529290989363
TGGT1_217630:E007	TGGT1_217630	E007	0.0474528302395999	9.52445160223219e-11	6.49456587927547e-09	20.9544281539811	-1.5267837731351
TGGT1_221818:E017	TGGT1_221818	E017	0.0019224684757605	9.54344636047406e-11	6.50202651403269e-09	531.352364700313	0.374209362556384
TGGT1_275320:E050	TGGT1_275320	E050	0.0111114771206757	9.57704709674041e-11	6.51941734700959e-09	89.8180815602578	-0.711257052269657
TGGT1_263730:E002	TGGT1_263730	E002	0.0179258101805174	1.00334956321622e-10	6.82438306539691e-09	55.57289530086	0.88165872529415
TGGT1_300052:E004	TGGT1_300052	E004	0.0144901381177217	1.03897375125867e-10	7.06073617911354e-09	193.806141538594	-0.680266705352861
TGGT1_300280:E004	TGGT1_300280	E004	0.0177003996448445	1.04577702748812e-10	7.10099312987831e-09	56.2827375186626	0.870601060529763
TGGT1_219770:E001	TGGT1_219770	E001	0.139255731406325	1.05161512093296e-10	7.13463418390943e-09	7.13515708096699	14.1457321194636
TGGT1_315160:E005	TGGT1_315160	E005	0.0132024174983629	1.05327312268461e-10	7.13988291855095e-09	75.535522201455	0.748399646643243
TGGT1_254120:E002	TGGT1_254120	E002	0.0069854494108447	1.06549251180431e-10	7.21665586749339e-09	143.277314998043	0.545408672216933
TGGT1_218210:E014	TGGT1_218210	E014	0.0290645163918486	1.07847178550376e-10	7.29844254841965e-09	51.2429055259635	-0.939873758177523
TGGT1_268880:E008	TGGT1_268880	E008	0.03683997544433	1.09478057531489e-10	7.40260550653664e-09	26.9997092723583	1.38654538481731
TGGT1_249770:E013	TGGT1_249770	E013	0.0043434672282244	1.1113421704683e-10	7.50830210315969e-09	231.509000759082	0.423239294318705
TGGT1_219620:E004	TGGT1_219620	E004	0.00417277960699897	1.11380854468523e-10	7.518673315649e-09	241.101210699204	-0.318108798140193
TGGT1_215990:E012	TGGT1_215990	E012	0.0289772600534945	1.13566562687088e-10	7.6598132318647e-09	39.9181541127024	1.5046785779789
TGGT1_318470:E001	TGGT1_318470	E001	0.0007336561678456	1.18078181318214e-10	7.95746408073957e-09	1459.68978653636	-1.23045488366878e-05
TGGT1_247370:E002	TGGT1_247370	E002	0.0876650631190323	1.19867801873928e-10	8.07133193018482e-09	11.3367295112143	2.56351949159997
TGGT1_313480:E034	TGGT1_313480	E034	0.079492590221666	1.20922211929188e-10	8.13554565008584e-09	12.5030165745515	3.05300023059474
TGGT1_207400:E013	TGGT1_207400	E013	0.00811574867030551	1.21686514070145e-10	8.18015046915337e-09	123.191041093402	0.21715717944878
TGGT1_277920:E004	TGGT1_277920	E004	0.0477214773927362	1.23645282056523e-10	8.30491002232393e-09	20.8363339066904	1.47605577618713
No_genes_on_ref_contig_18+No_genes_on_ref_contig_19:E001	No_genes_on_ref_contig_18+No_genes_on_ref_contig_19	E001	0.0191688366613629	1.24247613003738e-10	8.33720498456185e-09	156.845264372784	-0.356983107235086
TGGT1_310770:E011	TGGT1_310770	E011	0.013137145076996	1.24332628988821e-10	8.33720498456185e-09	75.9123498607463	0.785223537748899
TGGT1_288040:E012	TGGT1_288040	E012	0.0153544506383279	1.26687845869895e-10	8.48808567328298e-09	64.911873258417	-0.843157668637431
TGGT1_205500:E013	TGGT1_205500	E013	0.0233569494240439	1.2778784994629e-10	8.55468662140443e-09	42.6211452605371	1.10086894080747
TGGT1_293690:E002	TGGT1_293690	E002	0.0472370109624045	1.27990637243754e-10	8.56116329567067e-09	42.6741168272499	1.35495206193995
TGGT1_294270:E002	TGGT1_294270	E002	0.0244158283340515	1.2996279978376e-10	8.68588298058104e-09	40.7686907331268	1.18488318006712
TGGT1_217830:E007	TGGT1_217830	E007	0.0206463938513881	1.32903123766127e-10	8.87504855025495e-09	48.2311090391517	1.12143555865754
TGGT1_265530:E002	TGGT1_265530	E002	0.0322096778853844	1.34093701091924e-10	8.94715285756734e-09	67.1631607391155	1.12467914498009
TGGT1_214620:E006	TGGT1_214620	E006	0.00190520488520169	1.35618554679185e-10	9.03650937911301e-09	536.305444541664	-0.237679811398182
TGGT1_282090:E014	TGGT1_282090	E014	0.0217110852522271	1.35656770514461e-10	9.03650937911301e-09	45.8600887859322	0.986372734196499
TGGT1_263680:E007	TGGT1_263680	E007	0.0334776889118391	1.37125489967286e-10	9.12681486604191e-09	29.7157059804995	1.39428361919528
TGGT1_253810:E036	TGGT1_253810	E036	0.0722852944945798	1.37293632548728e-10	9.13047893230767e-09	13.7505639191205	2.98420738645502
TGGT1_205130:E020	TGGT1_205130	E020	0.0133744474302305	1.39107956407662e-10	9.24352334203503e-09	74.5600590366587	0.802477087271094
TGGT1_316600:E004	TGGT1_316600	E004	0.00699799453000847	1.39510641154767e-10	9.26265757699842e-09	179.19988030596	0.486965623772507
TGGT1_260340:E002	TGGT1_260340	E002	0.0210625465172447	1.40744791999224e-10	9.33691929503481e-09	47.2757475904434	1.04628367875772
TGGT1_217670:E001	TGGT1_217670	E001	0.00420997100522465	1.41277300417926e-10	9.36455077934421e-09	238.944025405132	-0.211536619470402
TGGT1_266035:E010	TGGT1_266035	E010	0.0670827907733851	1.45635584406895e-10	9.64552002222369e-09	14.8178146068329	-1.70428032396952
TGGT1_227840:E007	TGGT1_227840	E007	0.0109956369266816	1.47149711612493e-10	9.73781308773328e-09	90.7689263411429	0.68468399990759
TGGT1_219080:E002	TGGT1_219080	E002	0.0724750996833931	1.48497543928121e-10	9.8132244755591e-09	13.7145260774902	2.20174992444443
TGGT1_289580:E013	TGGT1_289580	E013	0.0212694009081634	1.48532362781114e-10	9.8132244755591e-09	46.8148166579501	1.05993328961059
TGGT1_226290:E025	TGGT1_226290	E025	0.0975499217136903	1.48960901846967e-10	9.83349011497539e-09	10.1873371586625	14.2350444090626
TGGT1_248880:E004	TGGT1_248880	E004	0.0291256292623272	1.5056097684653e-10	9.93099711250374e-09	53.3605455995075	1.12206260187303
TGGT1_320740:E001	TGGT1_320740	E001	0.0429017629445437	1.51284978674973e-10	9.97060632924403e-09	23.1800581712218	1.52247688494375
TGGT1_209830:E001	TGGT1_209830	E001	0.0068996887950732	1.53708854847245e-10	1.01220916770737e-08	145.072042125287	-0.557680718391895
TGGT1_299010:E014	TGGT1_299010	E014	0.0103847798719406	1.5698228875206e-10	1.03292298960045e-08	96.1356683726335	-0.661794304998803
TGGT1_256980:E004	TGGT1_256980	E004	0.0726361076002422	1.57390808745284e-10	1.0339257074085e-08	13.6841036567188	2.28325253520702
TGGT1_285830:E004	TGGT1_285830	E004	0.00424132588601237	1.57360181072052e-10	1.0339257074085e-08	237.155137021739	-0.39887652804261
TGGT1_310045:E001	TGGT1_310045	E001	0.00714737335226583	1.579196084549e-10	1.03655606411434e-08	140.007014404816	-0.527810103941997
TGGT1_203870:E005	TGGT1_203870	E005	0.0189257151177154	1.59184027550114e-10	1.04315929093007e-08	52.6285257432258	0.941418146186711
TGGT1_277760:E002	TGGT1_277760	E002	0.0171928601189134	1.59076212166263e-10	1.04315929093007e-08	57.9493831872152	0.905065368720552
TGGT1_243580:E006	TGGT1_243580	E006	0.0113171850539233	1.63963068519372e-10	1.07360570453459e-08	88.1777812757747	0.696958083295151
TGGT1_204070:E014	TGGT1_204070	E014	0.021382542106206	1.64781745385593e-10	1.07809191359043e-08	46.5664879309341	0.965677545325198
TGGT1_260470:E040	TGGT1_260470	E040	0.00671558370164709	1.66205851935244e-10	1.08652870089003e-08	250.913438747194	-0.497226410537756
TGGT1_221270:E005	TGGT1_221270	E005	0.00252007674709207	1.67636587910768e-10	1.09499513956116e-08	1031.48047607981	-0.205520287291653
TGGT1_292975:E045	TGGT1_292975	E045	0.00356027399449738	1.71198730777328e-10	1.11735889485106e-08	595.148074069684	0.325001931696499
TGGT1_202770:E008	TGGT1_202770	E008	0.0105802928401352	1.75653699446234e-10	1.14458445720676e-08	101.189855704535	0.666487354945355
TGGT1_214180:E008	TGGT1_214180	E008	0.0114744083300152	1.75516094057801e-10	1.14458445720676e-08	132.201464133476	0.661028016863134
No_genes_on_ref_contig_505+No_genes_on_ref_contig_529+No_genes_on_ref_contig_528+No_genes_on_ref_contig_527+No_genes_on_ref_contig_526+No_genes_on_ref_contig_525+No_genes_on_ref_contig_524+No_genes_on_ref_contig_523+No_genes_on_ref_contig_522+No_genes_on_ref_contig_521+No_genes_on_ref_contig_520+No_genes_on_ref_contig_516+No_genes_on_ref_contig_517+No_genes_on_ref_contig_514+No_genes_on_ref_conti…	No_genes_on_ref_contig_505+No_genes_on_ref_contig_529+No_genes_on_ref_contig_528+No_genes_on_ref_contig_527+No_genes_on_ref_contig_526+No_genes_on_ref_contig_525+No_genes_on_ref_contig_524+No_genes_on_ref_contig_523+No_genes_on_ref_contig_522+No_genes_on_ref_contig_521+No_genes_on_ref_contig_520+No_genes_on_ref_contig_516+No_genes_on_ref_contig_517+No_genes_on_ref_contig_514+No_genes_on_ref_conti…	E041	0.0115463731669169	1.78480580220516e-10	1.16124938647789e-08	86.4194046432922	-0.687149921962983
TGGT1_294898:E019	TGGT1_294898	E019	0.0169423662549636	1.7849885286667e-10	1.16124938647789e-08	58.8088677995806	0.915744293899863
TGGT1_215050:E002	TGGT1_215050	E002	0.0151346152658859	1.81752555381782e-10	1.1814647792873e-08	65.8580670047103	-0.638054433476224
TGGT1_307270:E004	TGGT1_307270	E004	0.0126762645206531	1.86654442067235e-10	1.21235288658875e-08	167.595245589691	-0.558323831603595
TGGT1_204330:E001	TGGT1_204330	E001	0.0380196767757951	1.89246014143906e-10	1.22819750417269e-08	26.1607690029084	1.39272381345546
TGGT1_269430:E048	TGGT1_269430	E048	0.0186029188059278	1.91564045033778e-10	1.24224282536563e-08	53.5443514049498	1.32137012854452
TGGT1_285830:E041	TGGT1_285830	E041	0.026786624763342	1.94674890361396e-10	1.2614026704115e-08	37.1532047077577	1.18197513786106
TGGT1_277030:E027	TGGT1_277030	E027	0.0916088158496966	1.96298074309216e-10	1.27090016273894e-08	10.8484004744764	2.74096618136031
TGGT1_205100:E004	TGGT1_205100	E004	0.0380052004718628	2.03905105099401e-10	1.31909284136219e-08	26.1707476969541	1.40972290004766
TGGT1_313410:E006	TGGT1_313410	E006	0.0546816930885667	2.06368726191905e-10	1.33396149792662e-08	18.1815760665876	1.82177902158844
TGGT1_222000:E004	TGGT1_222000	E004	0.0258408314927357	2.0837929620839e-10	1.34588019835075e-08	38.5158452655596	-1.08965802075135
TGGT1_320515:E020	TGGT1_320515	E020	0.0195920825918258	2.10229518998401e-10	1.35674502128984e-08	50.8336448942386	0.973989880863095
TGGT1_203450:E012	TGGT1_203450	E012	0.0200877150451386	2.13514582244097e-10	1.37574619293513e-08	66.2217160950421	0.862007244439005
TGGT1_263980:E010	TGGT1_263980	E010	0.029690212470028	2.13365487916135e-10	1.37574619293513e-08	33.5132411258978	1.34491156929538
TGGT1_275660:E011	TGGT1_275660	E011	0.00784249232671267	2.22779684428639e-10	1.43429966685376e-08	127.512717626166	-0.990973902881761
TGGT1_294805:E002	TGGT1_294805	E002	0.0639165366933413	2.27652665152422e-10	1.46450501363194e-08	15.5524611194218	-1.54413300790336
TGGT1_255260:E002	TGGT1_255260	E002	0.0020938208014917	2.32995742410749e-10	1.49768401779712e-08	519.167748643899	0.284761853735242
TGGT1_314000:E007	TGGT1_314000	E007	0.0476968835252575	2.43252188057476e-10	1.56236797158475e-08	20.8470897124377	1.49134974043725
TGGT1_293590:E003	TGGT1_293590	E003	0.0301014059230947	2.47134300511973e-10	1.58604036183102e-08	33.0546302978143	1.1742980293817
TGGT1_269680:E001	TGGT1_269680	E001	0.0246427136904229	2.52437153743217e-10	1.61878583061625e-08	40.3925212408723	1.80269972947162
TGGT1_203350:E014	TGGT1_203350	E014	0.0408470564372807	2.53335305488783e-10	1.62325602290769e-08	24.3475926727924	1.44021414962262
TGGT1_270530:E024	TGGT1_270530	E024	0.0460799865334646	2.56235517038995e-10	1.64053722982897e-08	21.579437346801	1.63521551497672
TGGT1_232035:E014	TGGT1_232035	E014	0.0141122164732775	2.61511602816e-10	1.67299043211963e-08	240.830821854659	-0.635596046602992
TGGT1_232250:E004	TGGT1_232250	E004	0.0232541538443379	2.62886297682242e-10	1.68045330509706e-08	42.8099852691464	1.03206618233475
TGGT1_273490:E006	TGGT1_273490	E006	0.029734336505178	2.63293771117765e-10	1.68172647240449e-08	33.4634202500116	1.23923351524789
TGGT1_221370:E012	TGGT1_221370	E012	0.045685162979264	2.71273787289338e-10	1.7313272108146e-08	21.7661501803041	1.6162227343025
TGGT1_282070:E008	TGGT1_282070	E008	0.0267587803280621	2.72938445125468e-10	1.74057546344429e-08	37.1919423275491	1.09881774438531
TGGT1_237150:E016	TGGT1_237150	E016	0.00309621520670104	2.7889707216247e-10	1.77717088563828e-08	326.39895413839	0.348079174172487
TGGT1_200700:E003	TGGT1_200700	E003	0.00500302246962137	2.79370908020449e-10	1.77878629803083e-08	200.660730123423	0.415343129760235
TGGT1_240610:E005	TGGT1_240610	E005	0.0313366721053155	2.87733432291957e-10	1.83055829437305e-08	31.7494271063741	1.33572430499741
TGGT1_306430:E029	TGGT1_306430	E029	0.00575975982808871	2.87955537728838e-10	1.83055829437305e-08	174.051372366097	-0.486822358482307
TGGT1_259115:E003	TGGT1_259115	E003	0.00254610078760989	2.88362662681931e-10	1.83170413624121e-08	398.426654550672	-0.336467389677882
TGGT1_289490:E004	TGGT1_289490	E004	0.0422421762203943	2.93505408220664e-10	1.86290559219303e-08	23.5424576826691	1.52490638470962
TGGT1_217010:E008	TGGT1_217010	E008	0.0358533630105992	2.94381944226689e-10	1.86700127785874e-08	27.743791377362	1.30556205517431
TGGT1_200290:E007	TGGT1_200290	E007	0.00578815683918803	2.94767592434444e-10	1.8670233742307e-08	173.189543317967	-0.496070043829135
TGGT1_313230:E005	TGGT1_313230	E005	0.0109556771795885	2.94847934866432e-10	1.8670233742307e-08	92.2831181612552	0.714757447637175
TGGT1_267510:E006	TGGT1_267510	E006	0.0140427848108748	3.13864859255879e-10	1.98588396645952e-08	70.9980283109431	0.737925151857116
TGGT1_316220:E005	TGGT1_316220	E005	0.0344663638783496	3.18156016740184e-10	2.01145857568667e-08	28.8619865075834	1.32205978423832
TGGT1_230190:E011	TGGT1_230190	E011	0.075246065263561	3.1970188660788e-10	2.01965037678304e-08	13.209125896566	2.11848915675857
TGGT1_289950:E010	TGGT1_289950	E010	0.0385252950339721	3.21544842608988e-10	2.02970468084728e-08	25.8169518053783	1.4287906291527
TGGT1_301390:E004	TGGT1_301390	E004	0.0255297054817978	3.23459204812047e-10	2.04019366410161e-08	38.9862115310116	1.11954598588077
TGGT1_310770:E009	TGGT1_310770	E009	0.0131077739241057	3.28223578257672e-10	2.06862846140774e-08	170.39849039419	0.644436844043342
TGGT1_242070:E006	TGGT1_242070	E006	0.0167941810335479	3.33356024676194e-10	2.09933686834887e-08	59.329423513602	0.867256124850106
TGGT1_261560:E008	TGGT1_261560	E008	0.0127447174698151	3.38957583700413e-10	2.13294937802438e-08	155.794526282917	-0.754003224887407
TGGT1_224350B:E001	TGGT1_224350B	E001	0.00287418932133717	3.41937866677545e-10	2.14853803053259e-08	386.46823767521	-0.258501326501026
TGGT1_318650:E011	TGGT1_318650	E011	0.0109428428856983	3.41967098437403e-10	2.14853803053259e-08	91.2089835067168	0.663917522136602
TGGT1_268880:E005	TGGT1_268880	E005	0.0403078509246112	3.4282422920225e-10	2.15057607961489e-08	24.6737254562054	1.4406710729435
TGGT1_285240:E013	TGGT1_285240	E013	0.0333197884718795	3.42639312267792e-10	2.15057607961489e-08	59.3177104461931	1.12248862801789
TGGT1_290170:E021	TGGT1_290170	E021	0.0112367270855612	3.43292800961967e-10	2.15184350043979e-08	88.8121621041754	-0.717174601870524
TGGT1_312160:E003	TGGT1_312160	E003	0.0103997989700421	3.45660003957573e-10	2.16500080834094e-08	95.9961178548934	0.621852097788849
TGGT1_297500:E016	TGGT1_297500	E016	0.0213283053212419	3.46083294193556e-10	2.16597168656719e-08	86.2169735956994	0.900867597447544
TGGT1_206400:E020	TGGT1_206400	E020	0.0125482908194855	3.50504720556991e-10	2.19194412193406e-08	79.4898642368385	0.550970203087724
No_genes_on_ref_contig_505+No_genes_on_ref_contig_529+No_genes_on_ref_contig_528+No_genes_on_ref_contig_527+No_genes_on_ref_contig_526+No_genes_on_ref_contig_525+No_genes_on_ref_contig_524+No_genes_on_ref_contig_523+No_genes_on_ref_contig_522+No_genes_on_ref_contig_521+No_genes_on_ref_contig_520+No_genes_on_ref_contig_516+No_genes_on_ref_contig_517+No_genes_on_ref_contig_514+No_genes_on_ref_conti…	No_genes_on_ref_contig_505+No_genes_on_ref_contig_529+No_genes_on_ref_contig_528+No_genes_on_ref_contig_527+No_genes_on_ref_contig_526+No_genes_on_ref_contig_525+No_genes_on_ref_contig_524+No_genes_on_ref_contig_523+No_genes_on_ref_contig_522+No_genes_on_ref_contig_521+No_genes_on_ref_contig_520+No_genes_on_ref_contig_516+No_genes_on_ref_contig_517+No_genes_on_ref_contig_514+No_genes_on_ref_conti…	E052	0.00908955715445813	3.53008158704624e-10	2.20589115271036e-08	109.915260924012	0.647950282842112
TGGT1_315690:E021	TGGT1_315690	E021	0.00836689155263429	3.54652888638928e-10	2.21445483095621e-08	119.469636246585	-0.581706940879047
TGGT1_316600:E002	TGGT1_316600	E002	0.0255601092511083	3.56755920829316e-10	2.22586470387595e-08	38.9397406510808	1.05617149968485
No_genes_on_ref_contig_442+No_genes_on_ref_contig_443+No_genes_on_ref_contig_444+No_genes_on_ref_contig_445:E002	No_genes_on_ref_contig_442+No_genes_on_ref_contig_443+No_genes_on_ref_contig_444+No_genes_on_ref_contig_445	E002	0.00531974484501473	3.577915543951e-10	2.23060240494891e-08	188.593248318032	0.389371995443133
TGGT1_311110:E006	TGGT1_311110	E006	0.0158929942182094	3.68858102923162e-10	2.29782090582573e-08	62.7049059802284	0.739824294712265
TGGT1_217020:E006	TGGT1_217020	E006	0.00855233372185723	3.8358047710777e-10	2.38585283661755e-08	116.862929435597	0.551389463441361
TGGT1_286090:E009	TGGT1_286090	E009	0.00413258950157446	3.83561724756507e-10	2.38585283661755e-08	765.386803980101	-0.333596971848176
TGGT1_224350A:E011	TGGT1_224350A	E011	0.00379168261776938	3.90151976636988e-10	2.42485910960641e-08	265.678918796944	-0.382723116758636
TGGT1_236200:E023	TGGT1_236200	E023	0.0177505917017365	3.93398784938682e-10	2.44315776169419e-08	56.1231123638544	0.837278345578495
TGGT1_239910:E003	TGGT1_239910	E003	0.00899746843283466	3.94030408129895e-10	2.44519946198056e-08	158.391984387105	0.060745622711127
TGGT1_250100:E006	TGGT1_250100	E006	0.00116687748632166	4.06477854810353e-10	2.52050611429446e-08	891.861372001405	-0.172820966197284
TGGT1_278510:E018	TGGT1_278510	E018	0.0127763585901181	4.11697712713199e-10	2.55091441564851e-08	175.949438354741	-0.679541144713
TGGT1_310050:E010	TGGT1_310050	E010	0.0087134135946033	4.1515897361905e-10	2.570388016498e-08	114.689276326384	0.598775265453978
TGGT1_311800:E010	TGGT1_311800	E010	0.0203415425159694	4.15546842455609e-10	2.57081795598878e-08	48.9558271603303	0.916701739456446
TGGT1_225060:E014	TGGT1_225060	E014	0.0284886219980686	4.16667988768199e-10	2.57578025062791e-08	34.9294048683892	1.23053990574165
TGGT1_304700:E039	TGGT1_304700	E039	0.027114136566202	4.17104976332123e-10	2.57650881898806e-08	36.703548423942	1.61229730488852
TGGT1_278030:E003	TGGT1_278030	E003	0.0312273320307695	4.17842496414435e-10	2.57712100443235e-08	31.860785026002	1.21943433267665
TGGT1_289670:E014	TGGT1_289670	E014	0.0100627836968248	4.17744181060748e-10	2.57712100443235e-08	264.998787066533	0.471582108706863
TGGT1_272320:E005	TGGT1_272320	E005	0.0084422917647382	4.2189660295862e-10	2.60013910227971e-08	118.395854583303	0.578720646004832
TGGT1_233905:E005	TGGT1_233905	E005	0.0455520504832158	4.24439175431125e-10	2.61381364061265e-08	21.8298297580735	1.49231266078501
TGGT1_246620:E002	TGGT1_246620	E002	0.0371290206943967	4.42264031365133e-10	2.72150812288598e-08	26.78921788191	1.29065757706398
TGGT1_292130:E005	TGGT1_292130	E005	0.00913876656583435	4.46022321775568e-10	2.74254471809219e-08	109.319934845573	0.63637957113952
TGGT1_240960:E001	TGGT1_240960	E001	0.0863715237704803	4.5125291666744e-10	2.77259545107654e-08	11.5066182179807	2.66476771913865
TGGT1_288245:E009	TGGT1_288245	E009	0.0339014853879714	4.58622705697417e-10	2.81573415547384e-08	29.3436511710822	1.29047435016429
TGGT1_200290:E009	TGGT1_200290	E009	0.00326580830655908	4.59386181949901e-10	2.8182783738393e-08	331.529086251837	-0.335216956720175
TGGT1_278830:E031	TGGT1_278830	E031	0.0276080268137615	4.62517112353061e-10	2.83533174379836e-08	36.0456769318586	1.14927057638093
TGGT1_318310:E009	TGGT1_318310	E009	0.0109745212220335	4.64766102708506e-10	2.84695685145457e-08	170.800619146326	-0.611063606023456
TGGT1_244700:E004	TGGT1_244700	E004	0.00491005076587959	4.71233964901819e-10	2.88438772982171e-08	204.501867446695	0.457019184657559
TGGT1_307590:E001	TGGT1_307590	E001	0.0190864601220094	4.72410865315449e-10	2.88940084933657e-08	52.1840522490692	-0.556894188402425
TGGT1_297340:E002	TGGT1_297340	E002	0.051210557785457	4.75438847884334e-10	2.90571955972306e-08	19.4152349733216	1.61830232852001
TGGT1_268250:E007	TGGT1_268250	E007	0.0212424018137178	4.77295580065007e-10	2.91486071532135e-08	46.8744677298338	0.980345592145672
TGGT1_267730:E004	TGGT1_267730	E004	0.0138879349389277	4.80220633630627e-10	2.9305073965358e-08	97.838312251095	-0.402626826381039
TGGT1_255190:E003	TGGT1_255190	E003	0.00571081000394334	4.81541800722361e-10	2.93635024783383e-08	175.557274663844	-0.486580995460998
TGGT1_220880:E002	TGGT1_220880	E002	0.0157532491930759	4.92044233577329e-10	2.99812763757477e-08	63.2630384668497	-0.813193437098354
TGGT1_321500:E004	TGGT1_321500	E004	0.0255188099989113	4.94201890013075e-10	3.00900373983451e-08	69.4871257895106	0.98212376740581
TGGT1_202460:E035	TGGT1_202460	E035	0.0499896739323946	5.00148142462694e-10	3.04291335958746e-08	19.8899131499894	1.59548163950415
TGGT1_205700:E003	TGGT1_205700	E003	0.00213140045016311	5.0233845168996e-10	3.05393786876423e-08	477.932424303559	0.283049737012156
TGGT1_262400:E008	TGGT1_262400	E008	0.0130522491642518	5.02721456386122e-10	3.05396665021321e-08	81.2727369699684	0.734901451437267
TGGT1_292975:E035	TGGT1_292975	E035	0.0140267987467322	5.04541951429548e-10	3.06272138711764e-08	87.2693695410382	-0.726439980974582
TGGT1_304700:E008	TGGT1_304700	E008	0.0187611178461439	5.14610540643061e-10	3.12149376399831e-08	53.0915659994592	1.14681771067458
TGGT1_228750:E002	TGGT1_228750	E002	0.0128444051846616	5.16160737170459e-10	3.12854632998926e-08	77.6496842481194	0.726232995091993
TGGT1_263430:E009	TGGT1_263430	E009	0.0359313716084059	5.17761574810459e-10	3.13589502943154e-08	27.6834690387105	1.29757544082647
TGGT1_255635:E002	TGGT1_255635	E002	0.0534163184877948	5.18594051484142e-10	3.13858251473555e-08	18.6127073803578	1.95842877297186
TGGT1_260270:E004	TGGT1_260270	E004	0.0158620228630733	5.19067034345925e-10	3.13909191145455e-08	118.089295096271	0.753605341199775
TGGT1_290650:E004	TGGT1_290650	E004	0.0184552201499436	5.22640503780783e-10	3.15833690664233e-08	53.9741105007315	1.05598714152416
TGGT1_244700:E027	TGGT1_244700	E027	0.0344106679126563	5.46789150281089e-10	3.30179671263603e-08	28.9087739179651	-1.2509683637883
TGGT1_203540:E007	TGGT1_203540	E007	0.0264340884323093	5.49960098124424e-10	3.31786714623126e-08	37.6496952776542	1.07771247841036
TGGT1_285980A:E009	TGGT1_285980A	E009	0.0521934564678608	5.50272386053589e-10	3.31786714623126e-08	19.0492372594719	1.59745018464072
TGGT1_305990:E005	TGGT1_305990	E005	0.000752904047154249	5.59053795950558e-10	3.36829912060211e-08	1419.53485457957	0.184028594456146
TGGT1_240050:E014	TGGT1_240050	E014	0.07122818756137	5.61478324535687e-10	3.38038423052861e-08	13.9547904344307	2.1960457702383
TGGT1_206550:E026	TGGT1_206550	E026	0.0103613175868319	5.68230873414614e-10	3.41848879024805e-08	96.3544829044646	1.04196097342899
TGGT1_203490:E008	TGGT1_203490	E008	0.0424801917049044	5.7987850871226e-10	3.48596361882981e-08	23.4103844119244	1.56640110822989
TGGT1_240240:E003	TGGT1_240240	E003	0.0806583444996312	5.87468364586933e-10	3.528962679682e-08	12.322191293339	2.83194091643502
TGGT1_271760:E003	TGGT1_271760	E003	0.0175684290553834	5.9528772132992e-10	3.57327540383428e-08	56.7068069233743	0.845821752280323
TGGT1_202470:E001	TGGT1_202470	E001	0.00214410405007619	6.0958969926355e-10	3.65640597102844e-08	712.322577437725	-0.10115497205961
TGGT1_299010:E010	TGGT1_299010	E010	0.00959301795596765	6.1407046578205e-10	3.68054781402478e-08	104.114509019577	-0.61271261290704
TGGT1_203910:E008	TGGT1_203910	E008	0.032616638807254	6.17895725519791e-10	3.70064318936082e-08	30.5014560461013	1.23895836726667
TGGT1_298060:E021	TGGT1_298060	E021	0.00876065476361214	6.18339959428716e-10	3.70064318936082e-08	114.067043368292	-0.569795187028465
TGGT1_295400:E008	TGGT1_295400	E008	0.0364576258555644	6.29508908810234e-10	3.76469642613291e-08	27.2832828209806	1.37185057011046
TGGT1_236660:E004	TGGT1_236660	E004	0.0115049961337697	6.31428878586573e-10	3.77338345763782e-08	86.7316511652259	0.669253675330729
TGGT1_221330:E028	TGGT1_221330	E028	0.0281113792369352	6.37634428853401e-10	3.80764908383723e-08	35.3990316556152	1.08612186061172
TGGT1_299120:E001	TGGT1_299120	E001	0.0531560931618794	6.42032076739057e-10	3.83107610609962e-08	18.703917086637	1.54160982680663
TGGT1_224210:E018	TGGT1_224210	E018	0.0433143313508305	6.4678224047388e-10	3.85657047154053e-08	22.9589968430125	1.52334618873469
TGGT1_266060:E008	TGGT1_266060	E008	0.00104588951158024	6.49973509812473e-10	3.87273884241402e-08	1000.56225015619	0.192584189453105
TGGT1_321630:E016	TGGT1_321630	E016	0.00698467874520598	6.50675155457669e-10	3.87406037432706e-08	144.1733503624	-0.508756578210504
TGGT1_311250:E003	TGGT1_311250	E003	0.0651454478155922	6.53266466404219e-10	3.88662256191191e-08	15.2588378733851	2.18953720515071
TGGT1_209160:E018	TGGT1_209160	E018	0.0446609637454341	6.59104853739858e-10	3.91847057192102e-08	22.2659035948735	1.39830347680368
TGGT1_225990:E002	TGGT1_225990	E002	0.0753412268227588	6.6299251157796e-10	3.93868288611086e-08	13.1924299977191	2.35341866491159
No_genes_on_ref_contig_396+No_genes_on_ref_contig_397+No_genes_on_ref_contig_400+No_genes_on_ref_contig_398+No_genes_on_ref_contig_399+No_genes_on_ref_contig_402+No_genes_on_ref_contig_401+No_genes_on_ref_contig_403:E005	No_genes_on_ref_contig_396+No_genes_on_ref_contig_397+No_genes_on_ref_contig_400+No_genes_on_ref_contig_398+No_genes_on_ref_contig_399+No_genes_on_ref_contig_402+No_genes_on_ref_contig_401+No_genes_on_ref_contig_403	E005	0.0303970556973282	6.88536585053375e-10	4.08742655840325e-08	32.987589798637	1.1599994752389
TGGT1_259230:E010	TGGT1_259230	E010	0.0650691678471515	7.00672750765115e-10	4.15641546899497e-08	15.2767403055617	2.27473100717669
TGGT1_263570:E005	TGGT1_263570	E005	0.0158683904288316	7.0228031908198e-10	4.16289291931598e-08	62.8024564871695	0.797700778074475
TGGT1_288640:E010	TGGT1_288640	E010	0.00579642744942321	7.18550979123089e-10	4.25621520906109e-08	172.940138750634	0.379652531156714
TGGT1_314970:E007	TGGT1_314970	E007	0.013427626257446	7.27270777791739e-10	4.30470720271378e-08	74.2635961370382	0.748632666517513
TGGT1_300290:E006	TGGT1_300290	E006	0.00719885469534606	7.30888366696895e-10	4.32295035056951e-08	138.998322351409	-0.484282492331017
TGGT1_235140:E005	TGGT1_235140	E005	0.00138171751336716	7.31632998535794e-10	4.32418668644124e-08	934.248891283501	-0.196783625533327
TGGT1_211675:E001	TGGT1_211675	E001	0.0287822122557247	7.33800291146146e-10	4.33065544632194e-08	34.5724507714784	-0.436484749632496
TGGT1_282090:E013	TGGT1_282090	E013	0.0249653379993652	7.33415118285817e-10	4.33065544632194e-08	39.869418104093	1.01543868796755
No_genes_on_ref_contig_828+No_genes_on_ref_contig_829+No_genes_on_ref_contig_835+No_genes_on_ref_contig_834+No_genes_on_ref_contig_836+No_genes_on_ref_contig_831+No_genes_on_ref_contig_830+No_genes_on_ref_contig_833+No_genes_on_ref_contig_832:E007	No_genes_on_ref_contig_828+No_genes_on_ref_contig_829+No_genes_on_ref_contig_835+No_genes_on_ref_contig_834+No_genes_on_ref_contig_836+No_genes_on_ref_contig_831+No_genes_on_ref_contig_830+No_genes_on_ref_contig_833+No_genes_on_ref_contig_832	E007	0.0853912028738908	7.49714081674669e-10	4.4213415912348e-08	11.6388005986369	2.60455512626487
TGGT1_293590:E004	TGGT1_293590	E004	0.0179466890469405	7.50782589015586e-10	4.4244111185528e-08	55.5080504804319	0.846724956388427
TGGT1_309980:E082	TGGT1_309980	E082	0.00990629422250183	7.59741939533357e-10	4.47394350752922e-08	100.804213153544	0.645660032667903
No_genes_on_ref_contig_505+No_genes_on_ref_contig_529+No_genes_on_ref_contig_528+No_genes_on_ref_contig_527+No_genes_on_ref_contig_526+No_genes_on_ref_contig_525+No_genes_on_ref_contig_524+No_genes_on_ref_contig_523+No_genes_on_ref_contig_522+No_genes_on_ref_contig_521+No_genes_on_ref_contig_520+No_genes_on_ref_contig_516+No_genes_on_ref_contig_517+No_genes_on_ref_contig_514+No_genes_on_ref_conti…	No_genes_on_ref_contig_505+No_genes_on_ref_contig_529+No_genes_on_ref_contig_528+No_genes_on_ref_contig_527+No_genes_on_ref_contig_526+No_genes_on_ref_contig_525+No_genes_on_ref_contig_524+No_genes_on_ref_contig_523+No_genes_on_ref_contig_522+No_genes_on_ref_contig_521+No_genes_on_ref_contig_520+No_genes_on_ref_contig_516+No_genes_on_ref_contig_517+No_genes_on_ref_contig_514+No_genes_on_ref_conti…	E057	0.00280245769798971	7.75327329986288e-10	4.56239445965327e-08	361.274802878065	0.313716543859198
TGGT1_202460:E010	TGGT1_202460	E010	0.0755968960504755	7.80169395405758e-10	4.58754378281747e-08	13.1477816779751	2.23837134616777
TGGT1_261022:E097	TGGT1_261022	E097	0.00492624510443772	7.88469317366529e-10	4.6329745514983e-08	203.822254768586	-0.433559336936462
TGGT1_239830:E001	TGGT1_239830	E001	0.0857484548914807	7.90500770849612e-10	4.64153307160316e-08	11.5902799918725	2.26172272235679
TGGT1_321530:E006	TGGT1_321530	E006	0.0227050041468436	7.98138556549034e-10	4.68297357289144e-08	49.0455822774344	0.935428461067576
TGGT1_222220:E002	TGGT1_222220	E002	0.0445353660273441	8.01014720592607e-10	4.69643598162993e-08	72.3615030593313	1.24669941466813
TGGT1_320515:E010	TGGT1_320515	E010	0.0346968312033379	8.13603296947453e-10	4.76678245131006e-08	28.6699815810725	1.34050577097123
TGGT1_250840:E031	TGGT1_250840	E031	0.027787607666395	8.15359812838160e-10	4.77360946261703e-08	39.9325864612423	1.0633548620585
TGGT1_202460:E019	TGGT1_202460	E019	0.0431185045881276	8.25277328057598e-10	4.8281713826616e-08	23.0633961436115	1.4432328000426
TGGT1_318410:E013	TGGT1_318410	E013	0.023504204369161	8.25880886608869e-10	4.82820372051898e-08	42.3535158429072	1.03819992634591
TGGT1_310100:E021	TGGT1_310100	E021	0.0666161269350337	8.35577071846124e-10	4.88135418925447e-08	14.9217003613076	2.46614258824145
TGGT1_217040:E010	TGGT1_217040	E010	0.0597290408134416	8.50654734811327e-10	4.96557331309649e-08	59.0424376774343	-1.05833498723253
TGGT1_290650:E016	TGGT1_290650	E016	0.00532200522750061	8.51223566647123e-10	4.96557331309649e-08	188.512339243269	-0.439282413911421
TGGT1_202540:E015	TGGT1_202540	E015	0.0180963165565271	8.55602096748083e-10	4.98689984956735e-08	55.047734291975	0.865453464533643
TGGT1_217670:E006	TGGT1_217670	E006	0.0390241441606609	8.56114843810039e-10	4.98689984956735e-08	25.4864807488031	1.20840493682029
TGGT1_278510:E020	TGGT1_278510	E020	0.0124465983514861	8.69385918206453e-10	5.06055314393641e-08	135.641834106454	-0.689869393764421
TGGT1_309610:E008	TGGT1_309610	E008	0.010681186153468	8.82310432003743e-10	5.1320844904771e-08	93.4545152350817	0.684343336281403
TGGT1_225050:E002	TGGT1_225050	E002	0.0409955721807376	8.8331168148632e-10	5.13420940279324e-08	24.2592733587789	1.47548350030147
TGGT1_240810:E005	TGGT1_240810	E005	0.00117779217142588	8.92860467989268e-10	5.18597768943263e-08	883.205324693321	-0.136736236846487
TGGT1_206360:E009	TGGT1_206360	E009	0.0289555459070161	8.97730294345959e-10	5.21051440072042e-08	34.3651121551839	1.17003505830153
TGGT1_217830:E020	TGGT1_217830	E020	0.039873993188092	9.02827522949928e-10	5.23633477481052e-08	24.9425521187556	1.71766833334091
TGGT1_259230:E012	TGGT1_259230	E012	0.0658021210215231	9.04524637075497e-10	5.24241181437834e-08	15.1064388341072	2.26643615899867
TGGT1_227840:E003	TGGT1_227840	E003	0.0191881680902273	9.08812480726331e-10	5.26348462205455e-08	51.9066784748974	0.882596461490973
TGGT1_264780:E001	TGGT1_264780	E001	0.0521359351909315	9.22179050352404e-10	5.33706993764884e-08	19.0702756473497	1.70287453883775
TGGT1_233080:E006	TGGT1_233080	E006	0.0450572936916517	9.32166985708314e-10	5.39101014263329e-08	22.069818155662	1.45047925649363
TGGT1_278830:E046	TGGT1_278830	E046	0.0239014547306669	9.33316238060728e-10	5.39379287615124e-08	41.6480151328478	1.03451323057717
TGGT1_245746B:E019	TGGT1_245746B	E019	0.0108835094763106	9.57387073205938e-10	5.52894458907592e-08	91.708668938513	0.491460556675879
TGGT1_260480:E003	TGGT1_260480	E003	0.00924442233701888	9.59726506377162e-10	5.53849317314941e-08	108.063268268627	0.543532587023563
TGGT1_300055:E011	TGGT1_300055	E011	0.00325969962123568	9.64416765692078e-10	5.56158482701071e-08	505.043397762223	0.324146676685674
TGGT1_214940:E004	TGGT1_214940	E004	0.00882990995753073	9.83565884156431e-10	5.66796514328119e-08	462.7256679143	0.503276182598497
TGGT1_300250:E002	TGGT1_300250	E002	0.0434561553439595	1.00254805787159e-09	5.77323234324273e-08	22.8839757350689	1.34678680950193
TGGT1_306430:E013	TGGT1_306430	E013	0.0674227826566393	1.01036040266875e-09	5.81407320808708e-08	14.7430340058728	2.4557654700163
TGGT1_230400:E021	TGGT1_230400	E021	0.0956114400136605	1.0157694049217e-09	5.84103581954086e-08	10.3939961544982	2.67871374911056
TGGT1_308000:E026	TGGT1_308000	E026	0.0237318737926574	1.01683527123637e-09	5.84300324720773e-08	41.9462883493005	0.99566025481633
TGGT1_200330:E033	TGGT1_200330	E033	0.00180647871380403	1.01874325529091e-09	5.84980346485858e-08	566.504785246273	0.244970937785998
TGGT1_306350:E015	TGGT1_306350	E015	0.0113667503398427	1.02087805166072e-09	5.85789548691032e-08	87.7914690286146	-0.3369562910844
TGGT1_311320:E007	TGGT1_311320	E007	0.00446982953226994	1.02546069114306e-09	5.88001199569851e-08	224.88537173	0.325922158377537
TGGT1_306350:E013	TGGT1_306350	E013	0.0142183646207707	1.03653699145564e-09	5.93930546523568e-08	70.1179937630535	-0.430317910906186
TGGT1_320515:E013	TGGT1_320515	E013	0.0328750848372407	1.03905455869873e-09	5.94950849620865e-08	30.261281416751	1.2664303816477
TGGT1_236220:E019	TGGT1_236220	E019	0.01788063090624	1.04346422241606e-09	5.97052331656699e-08	55.7137313709318	0.839170800947593
TGGT1_207460B:E013	TGGT1_207460B	E013	0.0342291759945654	1.05185596584612e-09	6.01427701151463e-08	29.0622943692539	1.21559268954421
TGGT1_215347:E003	TGGT1_215347	E003	0.00732285619777999	1.06482464354477e-09	6.08412014130125e-08	136.627365889996	0.484363029485554
TGGT1_293350:E003	TGGT1_293350	E003	0.0447984817253799	1.06612187130659e-09	6.08722413578057e-08	22.1974726218396	1.52123654043924
TGGT1_248880:E013	TGGT1_248880	E013	0.0170831551480139	1.0702647764605e-09	6.10306303541518e-08	58.3226866545184	0.85758482723765
TGGT1_311110:E002	TGGT1_311110	E002	0.0407223469265113	1.07040778573703e-09	6.10306303541518e-08	24.4222531410297	1.2993076703886
TGGT1_218570:E001	TGGT1_218570	E001	0.00333763651626354	1.08694542649019e-09	6.1929808756306e-08	302.407002308165	0.301081646846115
TGGT1_231992:E001	TGGT1_231992	E001	0.00485105901960811	1.09027355134257e-09	6.20756242367014e-08	207.016314416751	-0.357049762128065
TGGT1_244165:E043	TGGT1_244165	E043	0.091261710835793	1.09339710057854e-09	6.22095947253056e-08	10.8896853810763	3.01568166392384
TGGT1_217550:E008	TGGT1_217550	E008	0.00874004222679272	1.09592777305492e-09	6.23096681391473e-08	114.337707362635	-0.585306446645493
TGGT1_293050:E002	TGGT1_293050	E002	0.00588093362609721	1.12942945682959e-09	6.41692379993924e-08	170.432380066172	-0.388177315944954
TGGT1_223920:E008	TGGT1_223920	E008	0.0409874355902667	1.13302606921493e-09	6.43106679171976e-08	24.264095431206	1.3842065356522
TGGT1_228330:E019	TGGT1_228330	E019	0.0588269495740466	1.13351186531458e-09	6.43106679171976e-08	16.899246507066	1.94604861509377
TGGT1_236660:E002	TGGT1_236660	E002	0.00996460857452714	1.14744166029556e-09	6.5055268570198e-08	100.211124722717	0.606459340218571
TGGT1_216730:E017	TGGT1_216730	E017	0.0855016126572336	1.15407064366512e-09	6.53612631009907e-08	11.6237618442524	2.29225745898668
TGGT1_311335:E048	TGGT1_311335	E048	0.0952847802393552	1.15445793252013e-09	6.53612631009907e-08	10.429649253961	2.2811839734553
TGGT1_280660:E010	TGGT1_280660	E010	0.0300795920455622	1.15659564017244e-09	6.5436404351312e-08	33.0786441732141	1.1866898818309
TGGT1_310450:E017	TGGT1_310450	E017	0.00770615265220115	1.17439408156915e-09	6.63968530640656e-08	129.784400094756	0.538160506675953
TGGT1_238230:E024	TGGT1_238230	E024	0.0334462554328393	1.19721090553067e-09	6.75921835370758e-08	29.7436779180934	-1.20366224910878
TGGT1_319540:E016	TGGT1_319540	E016	0.0528737930404674	1.19691382633346e-09	6.75921835370758e-08	18.8038803650234	1.98552061547523
TGGT1_224830:E011	TGGT1_224830	E011	0.00599448473989941	1.20245929371224e-09	6.78410559593696e-08	167.175031026634	0.391851010657591
TGGT1_235920:E085	TGGT1_235920	E085	0.0954928395104668	1.20546655298189e-09	6.79632277618664e-08	10.406912521166	14.204637636885
TGGT1_316200:E003	TGGT1_316200	E003	0.0111306367475579	1.21853822920022e-09	6.86522567581857e-08	89.6627312361678	0.667159841303977
TGGT1_238240:E016	TGGT1_238240	E016	0.0137953133714391	1.21967975749499e-09	6.86686507819789e-08	195.651713198498	0.662387533645061
TGGT1_250010:E015	TGGT1_250010	E015	0.0511652413572365	1.2273384599908e-09	6.9051686806521e-08	19.432448713003	1.58587215328459
TGGT1_202650:E002	TGGT1_202650	E002	0.0350822392699003	1.24004407075902e-09	6.96694210526999e-08	28.3545390969906	1.17718094920863
TGGT1_318410:E005	TGGT1_318410	E005	0.0187315318518227	1.23997629774554e-09	6.96694210526999e-08	53.1756617374337	0.89577869778328
TGGT1_221950:E015	TGGT1_221950	E015	0.107413332340038	1.2539229179704e-09	7.04001855231852e-08	9.25140403145241	3.10448404440169
TGGT1_318410:E007	TGGT1_318410	E007	0.0199314475946997	1.25707036165452e-09	7.05278496512703e-08	49.9658031139478	0.936384797270444
TGGT1_243800:E008	TGGT1_243800	E008	0.0142423547877542	1.26078924608032e-09	7.06429170594677e-08	69.9994423566802	0.755469375675916
TGGT1_320000:E024	TGGT1_320000	E024	0.0757061429870071	1.26087128856992e-09	7.06429170594677e-08	13.1287955670017	2.3482279126279
TGGT1_269430:E032	TGGT1_269430	E032	0.0156762428296592	1.26251954512784e-09	7.06862104548518e-08	63.5748638596142	-0.840385649851354
TGGT1_226950:E011	TGGT1_226950	E011	0.0305496732818114	1.27121589383405e-09	7.11237804495438e-08	32.5687603622881	1.20266654396195
TGGT1_220290:E005	TGGT1_220290	E005	0.00512443684693557	1.27800448785997e-09	7.14540805591238e-08	195.856542432254	0.339123610137772
after_last_TGGT1_241710:E007	after_last_TGGT1_241710	E007	0.00815086910066687	1.28193290147544e-09	7.1624119585204e-08	150.758896298906	-0.489874634693625
TGGT1_266920:E007	TGGT1_266920	E007	0.0011694567789843	1.28404593684415e-09	7.16925648071318e-08	889.800552166361	0.197242153071962
TGGT1_232350:E007	TGGT1_232350	E007	0.0185489719313063	1.32835755223398e-09	7.4115374553981e-08	53.7005250912682	0.877698527079338
TGGT1_228460:E010	TGGT1_228460	E010	0.0312688242782648	1.35515372551909e-09	7.55060980191746e-08	31.8184352002797	1.1673432368339
TGGT1_238940:E003	TGGT1_238940	E003	0.0472553594020033	1.35463552731927e-09	7.55060980191746e-08	22.5409801471075	1.48123707358064
TGGT1_269430:E017	TGGT1_269430	E017	0.0149155164917408	1.36266928756707e-09	7.58724861598123e-08	66.828941035223	1.00865101356082
TGGT1_306430:E016	TGGT1_306430	E016	0.00485057194520172	1.36867575557984e-09	7.61544018792135e-08	207.037332733088	-0.427526751890874
TGGT1_208420:E005	TGGT1_208420	E005	0.0314881016804964	1.38572482187118e-09	7.70499266486015e-08	35.157314812234	1.15794680262929
TGGT1_230980:E027	TGGT1_230980	E027	0.0295462918007206	1.39330982618909e-09	7.74183543134041e-08	33.6767794458047	1.12204554689203
TGGT1_313990:E021	TGGT1_313990	E021	0.0189289898005312	1.39444689752905e-09	7.74282464044069e-08	52.6193954299935	1.1309043039269
TGGT1_224350A:E021	TGGT1_224350A	E021	0.0393948863797881	1.39766773171586e-09	7.75537486735947e-08	25.2463050191511	1.38328611541939
TGGT1_261022:E110	TGGT1_261022	E110	0.0144455934320189	1.41379342451171e-09	7.83946511867809e-08	69.0109613596503	-0.769967326004339
TGGT1_260310:E035	TGGT1_260310	E035	0.0536728246507226	1.44775098935556e-09	8.02224956249976e-08	18.5236676753574	1.67230534642799
TGGT1_299110:E014	TGGT1_299110	E014	0.0487315668667292	1.45443800227385e-09	8.0537758651289e-08	30.1006690307198	1.38598819461908
TGGT1_217020:E036	TGGT1_217020	E036	0.00337254167861348	1.45635355435794e-09	8.05885566902595e-08	299.226969378068	0.316689239656053
TGGT1_268310:E009	TGGT1_268310	E009	0.0306034413677347	1.46785383022953e-09	8.11137433152506e-08	32.5114396756279	-0.809777496392373
TGGT1_288945:E010	TGGT1_288945	E010	0.0359388772124659	1.46693071453643e-09	8.11137433152506e-08	27.6776789501461	-0.990811634486295
TGGT1_267308:E001	TGGT1_267308	E001	0.0507318989148285	1.49453424742515e-09	8.25316159137276e-08	19.5986113730074	1.74975376382474
TGGT1_243800:E009	TGGT1_243800	E009	0.0231157492601126	1.53505262677172e-09	8.47111919497025e-08	43.066899724328	0.976001308793608
TGGT1_235920:E062	TGGT1_235920	E062	0.0195137115905637	1.54153128239247e-09	8.50106066147242e-08	51.0383613463132	-0.875054284583798
TGGT1_314090:E009	TGGT1_314090	E009	0.0442226367282002	1.54424864755197e-09	8.51023307577528e-08	66.6586306116712	1.23647997900302
TGGT1_213748:E001	TGGT1_213748	E001	0.0104005882731276	1.55181224057898e-09	8.54608194018717e-08	95.9887952198549	-0.0941420224924151
TGGT1_260440:E011	TGGT1_260440	E011	0.0250532843591717	1.55723960704524e-09	8.5701254038717e-08	58.075898670879	1.00967804958617
TGGT1_202760:E014	TGGT1_202760	E014	0.0378520119062511	1.58791352786205e-09	8.73298356075901e-08	26.2768108449009	1.54178128618706
TGGT1_249300:E010	TGGT1_249300	E010	0.0141676535638193	1.60174553936634e-09	8.80305827915191e-08	122.672290078173	0.662093150584602
TGGT1_203940:E024	TGGT1_203940	E024	0.0303378050801411	1.60717174660822e-09	8.8268714940418e-08	32.7966084150087	1.14615991836153
TGGT1_320000:E020	TGGT1_320000	E020	0.0556234546313396	1.65380359106512e-09	9.0768071328785e-08	17.8734487398895	1.73311964641814
TGGT1_266920:E032	TGGT1_266920	E032	0.0104811848272209	1.71303396119896e-09	9.3955025038993e-08	95.246909036005	0.631597932452563
TGGT1_240620:E003	TGGT1_240620	E003	0.0441509330899476	1.72312293881786e-09	9.44442162019415e-08	22.5234292472329	-1.29889449839217
TGGT1_308090:E009	TGGT1_308090	E009	0.0391229094427563	1.72640746197281e-09	9.45600450762379e-08	25.422052819432	1.23624568732351
TGGT1_205580:E006	TGGT1_205580	E006	0.0367741816920782	1.76483494260369e-09	9.65992875193959e-08	36.3344409705751	1.29520852782637
TGGT1_248180:E001	TGGT1_248180	E001	0.0972137004460537	1.7778022526789e-09	9.724313338078e-08	10.2225901674014	2.31205870625813
TGGT1_223060:E007	TGGT1_223060	E007	0.0281392620373794	1.78267799411373e-09	9.74438103282142e-08	35.3638887904285	1.41807991101128
TGGT1_246485:E002	TGGT1_246485	E002	0.00534906416187835	1.83227464264938e-09	1.00087072580715e-07	187.549142660741	0.349984683556227
TGGT1_268610:E001	TGGT1_268610	E001	0.0515675025453056	1.84381116873883e-09	1.00649151256342e-07	19.2807059557122	1.43444288102351
TGGT1_299900:E022	TGGT1_299900	E022	0.0237827789127101	1.85599324468673e-09	1.01245685547151e-07	41.856304356062	0.919206068798585
TGGT1_286735:E006	TGGT1_286735	E006	0.00418001886262781	1.8827402229394e-09	1.02635403037821e-07	240.678269918667	-0.111712943888465
TGGT1_312105:E002	TGGT1_312105	E002	0.00133519362248865	1.9232164700188e-09	1.04771175240869e-07	774.765225131101	-0.0992345365098165
TGGT1_313180:E018	TGGT1_313180	E018	0.0340891182056164	1.96246448266162e-09	1.06837201623524e-07	61.4569022311332	1.08609080639814
TGGT1_215690:E010	TGGT1_215690	E010	0.00922666138067946	1.97889563749418e-09	1.07659123512865e-07	108.272492488529	-0.54757602897805
TGGT1_309980:E103	TGGT1_309980	E103	0.00641988141889627	1.99507907249891e-09	1.08466470651986e-07	199.018054607307	0.469239259946754
TGGT1_299110:E010	TGGT1_299110	E010	0.0248208925235665	2.04767435281967e-09	1.11251001934654e-07	40.1019371707218	1.005769225287
TGGT1_268880:E009	TGGT1_268880	E009	0.0595625140351306	2.08896116219847e-09	1.13417807283183e-07	16.6903634329221	1.77690260015917
TGGT1_319540:E015	TGGT1_319540	E015	0.0434916403030656	2.12727045845157e-09	1.15420148160677e-07	22.8652817572612	1.61102180742443
TGGT1_318310:E013	TGGT1_318310	E013	0.0141031441406513	2.15002282296374e-09	1.16576287852235e-07	70.6930165479734	-0.742463344362302
TGGT1_209830:E012	TGGT1_209830	E012	0.0557564823120381	2.15495335750007e-09	1.16765207595818e-07	17.8307642873965	-1.50004941911856
TGGT1_254470:E002	TGGT1_254470	E002	0.0031792824591988	2.17391666498182e-09	1.17713723640045e-07	320.920427644797	-0.333662862375825
TGGT1_297430:E014	TGGT1_297430	E014	0.029095029312771	2.20102131602721e-09	1.19101512030467e-07	34.200061756901	1.11271713323714
TGGT1_242080:E011	TGGT1_242080	E011	0.00777035022017371	2.31136858247745e-09	1.24988842937921e-07	128.704745079924	0.509380369935162
TGGT1_213445:E022	TGGT1_213445	E022	0.00377430085919897	2.32340701441842e-09	1.25555733138602e-07	266.919945751395	0.358481655754716
TGGT1_309095:E001	TGGT1_309095	E001	0.0152742461380008	2.34784281695121e-09	1.26791364432479e-07	65.2539147795155	0.212390217418313
TGGT1_262140:E019	TGGT1_262140	E019	0.0231099365618911	2.35603924793624e-09	1.27148949653832e-07	43.0777570745262	0.944230921727469
TGGT1_219770:E002	TGGT1_219770	E002	0.16065269665048	2.36752662168986e-09	1.2768354161799e-07	6.18452693390196	14.8573101883194
TGGT1_263060:E013	TGGT1_263060	E013	0.00922235923518364	2.39842462840461e-09	1.2926355966238e-07	108.323293746093	0.596356306565806
TGGT1_213240:E002	TGGT1_213240	E002	0.0208377251055775	2.45543969125047e-09	1.32248114391666e-07	47.7871188318261	0.844394528238031
TGGT1_270100:E003	TGGT1_270100	E003	0.0822049026110673	2.46590228564489e-09	1.32723080687693e-07	18.4984689906368	1.8719759329832
TGGT1_265000:E015	TGGT1_265000	E015	0.0481468785672041	2.49545530324468e-09	1.34224239778454e-07	20.6520310191449	1.76641026860476
TGGT1_235478:E004	TGGT1_235478	E004	0.0220172074818593	2.50092708191198e-09	1.34339552866377e-07	45.2209156860971	0.936926391082496
TGGT1_294898:E021	TGGT1_294898	E021	0.0224414181520993	2.50028955849709e-09	1.34339552866377e-07	44.3640717700834	1.00847590795913
TGGT1_206600:E006	TGGT1_206600	E006	0.0166341517307322	2.5155878549813e-09	1.34947498652435e-07	59.9020357193855	-0.759902192199441
TGGT1_275802:E018	TGGT1_275802	E018	0.0262605514609931	2.51556669911359e-09	1.34947498652435e-07	37.8990000593729	1.01032799919818
TGGT1_315690:E011	TGGT1_315690	E011	0.0104208851578336	2.64521351991044e-09	1.41806981095597e-07	95.8008770438771	-0.625234998987306
TGGT1_320000:E018	TGGT1_320000	E018	0.0785357178428173	2.69350233798612e-09	1.44299874756011e-07	12.6554555374452	2.31967140636575
TGGT1_210440:E013	TGGT1_210440	E013	0.0644580148071078	2.71325147427303e-09	1.45261510461163e-07	15.4217050663818	2.20248377555775
TGGT1_250330:E012	TGGT1_250330	E012	0.0136383519700321	2.71593690742536e-09	1.45308923937035e-07	73.1116570580822	0.727294033892912
TGGT1_269680:E006	TGGT1_269680	E006	0.0861994748703909	2.73729235858686e-09	1.46354502364576e-07	11.5295989141845	-1.5228853670924
TGGT1_290720:E017	TGGT1_290720	E017	0.00811999372049743	2.74547561483687e-09	1.4669488667363e-07	123.126213208019	-0.535125543330983
No_genes_on_ref_contig_707+No_genes_on_ref_contig_706+No_genes_on_ref_contig_705+No_genes_on_ref_contig_710+No_genes_on_ref_contig_711+No_genes_on_ref_contig_712+No_genes_on_ref_contig_713+No_genes_on_ref_contig_714+No_genes_on_ref_contig_709+No_genes_on_ref_contig_708:E003	No_genes_on_ref_contig_707+No_genes_on_ref_contig_706+No_genes_on_ref_contig_705+No_genes_on_ref_contig_710+No_genes_on_ref_contig_711+No_genes_on_ref_contig_712+No_genes_on_ref_contig_713+No_genes_on_ref_contig_714+No_genes_on_ref_contig_709+No_genes_on_ref_contig_708	E003	0.0153773582557738	2.76240305730106e-09	1.47501726740212e-07	104.547083125771	-0.642774662414305
No_genes_on_ref_contig_479+No_genes_on_ref_contig_484+No_genes_on_ref_contig_485+No_genes_on_ref_contig_486+No_genes_on_ref_contig_487+No_genes_on_ref_contig_480+No_genes_on_ref_contig_481+No_genes_on_ref_contig_482+No_genes_on_ref_contig_483+No_genes_on_ref_contig_488+No_genes_on_ref_contig_489+No_genes_on_ref_contig_493+No_genes_on_ref_contig_492+No_genes_on_ref_contig_491+No_genes_on_ref_conti…	No_genes_on_ref_contig_479+No_genes_on_ref_contig_484+No_genes_on_ref_contig_485+No_genes_on_ref_contig_486+No_genes_on_ref_contig_487+No_genes_on_ref_contig_480+No_genes_on_ref_contig_481+No_genes_on_ref_contig_482+No_genes_on_ref_contig_483+No_genes_on_ref_contig_488+No_genes_on_ref_contig_489+No_genes_on_ref_contig_493+No_genes_on_ref_contig_492+No_genes_on_ref_contig_491+No_genes_on_ref_conti…	E010	0.0191666373030734	2.84106315170746e-09	1.51601608429016e-07	51.9651500388481	0.855787339370159
TGGT1_227780:E002	TGGT1_227780	E002	0.0727193457364297	2.85787812065555e-09	1.52398144036411e-07	13.6684286884053	2.45422173465295
TGGT1_290040:E006	TGGT1_290040	E006	0.00582953292858132	2.86127230306309e-09	1.52478428638811e-07	323.939010466898	-0.301624664130626
TGGT1_235920:E089	TGGT1_235920	E089	0.0840648200527385	2.88947471819315e-09	1.5387977663148e-07	11.822555037268	2.89833731182085
TGGT1_224340:E003	TGGT1_224340	E003	0.00274743501441841	2.95326701565158e-09	1.57173376736078e-07	368.652936498277	-0.166913013597086
TGGT1_310380:E005	TGGT1_310380	E005	0.0453330397434782	2.96686765346167e-09	1.57793188407265e-07	21.9354168993257	-1.31114200911765
TGGT1_212950:E005	TGGT1_212950	E005	0.0797498099196768	2.98399717063373e-09	1.58599744286448e-07	12.4626632547619	1.9911697094887
TGGT1_232350:E010	TGGT1_232350	E010	0.0123624349170412	2.9872611441914e-09	1.58668768734403e-07	414.218306989558	0.569411849357564
TGGT1_243545:E004	TGGT1_243545	E004	0.00123564957326135	3.01541152374796e-09	1.60058678086648e-07	839.989401966191	0.186346424848321
TGGT1_321440:E002	TGGT1_321440	E002	0.0101396105911695	3.01757046094374e-09	1.60068036244608e-07	98.4724312323373	0.620187698690727
TGGT1_309110:E004	TGGT1_309110	E004	0.0311128863516247	3.03267312994635e-09	1.60763535880643e-07	31.9781825746203	-1.10947343618688
TGGT1_221818:E018	TGGT1_221818	E018	0.00287990378486698	3.03653979095777e-09	1.60862887154183e-07	351.376533173315	0.43775992952346
TGGT1_273100:E001	TGGT1_273100	E001	0.00937924092738926	3.05858342599632e-09	1.61924415014959e-07	106.501087452769	0.54563895533638
TGGT1_207700:E001	TGGT1_207700	E001	0.0102867102301619	3.09468679045174e-09	1.63635090604204e-07	101.288089157155	-0.21161727294554
TGGT1_239130:E006	TGGT1_239130	E006	0.00352667961867635	3.09494993934005e-09	1.63635090604204e-07	748.199023683755	-0.188846894060662
TGGT1_290890:E005	TGGT1_290890	E005	0.0232205221916249	3.13916066163919e-09	1.65863963362199e-07	42.8721319224781	0.948385751326849
TGGT1_227440:E004	TGGT1_227440	E004	0.00878913874956268	3.16667058919353e-09	1.67003633037622e-07	113.695121123806	-0.480691451149371
TGGT1_232730:E010	TGGT1_232730	E010	0.0353492858193029	3.16809305895382e-09	1.67003633037622e-07	28.1400114788287	1.25808719103643
TGGT1_252295:E003	TGGT1_252295	E003	0.0536821297449044	3.16743593241112e-09	1.67003633037622e-07	18.5204536540446	1.57435327605727
TGGT1_278830:E030	TGGT1_278830	E030	0.0302077475141041	3.16900434524848e-09	1.67003633037622e-07	32.9380613518043	1.14249912884975
TGGT1_320040:E010	TGGT1_320040	E010	0.133966973190063	3.17789092231818e-09	1.67362702944135e-07	7.41695128478577	3.23216800470679
TGGT1_232730:E008	TGGT1_232730	E008	0.0399814837611622	3.20988041714312e-09	1.68937219998729e-07	24.8754044722424	1.35037741476358
TGGT1_234670:E014	TGGT1_234670	E014	0.0335227798621868	3.25206676938721e-09	1.71046000408128e-07	29.6756723122529	1.17605863148103
TGGT1_310300:E005	TGGT1_310300	E005	0.0118613453627194	3.28356622511257e-09	1.72590311969052e-07	84.1142377191037	0.699018629065539
TGGT1_293540:E008	TGGT1_293540	E008	0.0231383452571003	3.29448795869828e-09	1.73051714603452e-07	43.024745334879	0.923219557368719
TGGT1_213060:E023	TGGT1_213060	E023	0.016238603991839	3.30679924517561e-09	1.73585459726432e-07	61.3659558023491	-0.75926988093173
TGGT1_245460:E003	TGGT1_245460	E003	0.0158344746948845	3.31589075282872e-09	1.73949603593e-07	62.9374261637575	0.840569933516436
TGGT1_200350:E021	TGGT1_200350	E021	0.00410406149638076	3.34260454671242e-09	1.75237128622615e-07	245.191225728782	0.362891659338684
TGGT1_272695:E002	TGGT1_272695	E002	0.0426542629933344	3.37514188039703e-09	1.76828085472975e-07	23.3147277074919	1.41164793273442
TGGT1_237220:E025	TGGT1_237220	E025	0.015243281715827	3.44050851435734e-09	1.80135833272788e-07	65.386932620295	-0.799713278281394
TGGT1_250940:E001	TGGT1_250940	E001	0.0136751974156492	3.50508263698399e-09	1.83397826764033e-07	72.9139008383474	-0.70821183305438
TGGT1_294020:E010	TGGT1_294020	E010	0.0212998268015176	3.53495391659158e-09	1.84841000295351e-07	46.7477761957892	0.902650459098332
TGGT1_311335:E018	TGGT1_311335	E018	0.0114034754478606	3.57939148572931e-09	1.87043476763984e-07	87.5074093426645	0.642003765179307
TGGT1_225060:E026	TGGT1_225060	E026	0.00732150794181711	3.58775348911022e-09	1.87359170726594e-07	136.65271003658	-0.596416714451774
TGGT1_218220:E009	TGGT1_218220	E009	0.0133523045368531	3.60096071207488e-09	1.87839720859618e-07	74.6842010341729	0.7101788819906
TGGT1_297510:E005	TGGT1_297510	E005	0.00391066736253105	3.6016088176217e-09	1.87839720859618e-07	257.483938754563	-0.245647085684918
TGGT1_299000:E012	TGGT1_299000	E012	0.0475280792210361	3.67933127118263e-09	1.91769406183944e-07	32.5928361605657	1.51246633917262
TGGT1_216760:E016	TGGT1_216760	E016	0.0337905063121198	3.70749715087881e-09	1.93112762887871e-07	29.4401773367086	1.20191737716937
TGGT1_299180:E002	TGGT1_299180	E002	0.0237833316221473	3.7370679413295e-09	1.94527517887323e-07	41.8553294609277	0.907075856345401
TGGT1_225120:E012	TGGT1_225120	E012	0.00360996557976412	3.7552399806347e-09	1.95347487008082e-07	462.667641392837	-0.348670788118536
TGGT1_268880:E001	TGGT1_268880	E001	0.0091212857972061	3.76814849881853e-09	1.95892768224156e-07	109.530673899632	-0.513481599746439
TGGT1_230500:E004	TGGT1_230500	E004	0.0242367478806322	3.78043480845052e-09	1.96405022046495e-07	41.070585245717	-0.99608248126913
TGGT1_242380:E001	TGGT1_242380	E001	0.00299642790171624	3.792060487702e-09	1.96882317347023e-07	1670.23924935894	-0.172064263054421
TGGT1_294630:E023	TGGT1_294630	E023	0.0371737024856665	3.80916347417647e-09	1.97643196071746e-07	26.7569718003133	1.25642971009076
TGGT1_293180:E016	TGGT1_293180	E016	0.0179862900168421	3.84718834004151e-09	1.99487958017502e-07	177.211186113165	-0.702286176270708
TGGT1_253810:E037	TGGT1_253810	E037	0.0756708079766885	3.86320636362313e-09	2.00189965190702e-07	13.1349304638379	2.44398998030287
TGGT1_251620:E004	TGGT1_251620	E004	0.0234306922204865	4.00586794701837e-09	2.07449486018299e-07	42.4866995065855	0.962180732111238
TGGT1_214210:E001	TGGT1_214210	E001	0.0328196930272925	4.10146852546509e-09	2.12264141925272e-07	30.3124381870935	1.28249569341508
TGGT1_305540:E028	TGGT1_305540	E028	0.0390972935170096	4.11164226914159e-09	2.12654348878377e-07	25.4387316464371	1.28455313865532
TGGT1_267140:E001	TGGT1_267140	E001	0.115669306114101	4.18225927081072e-09	2.16168183245137e-07	8.59077497136404	14.043002165891
TGGT1_207430:E014	TGGT1_207430	E014	0.0775284381783099	4.2181129747482e-09	2.17881862454444e-07	12.8199930840465	2.16189798629548
TGGT1_275670:E011	TGGT1_275670	E011	0.00899184245536308	4.23160220856822e-09	2.18438877435266e-07	111.116825447808	-0.62737442109061
TGGT1_253120:E025	TGGT1_253120	E025	0.0481538200297063	4.31269205152255e-09	2.22482551296916e-07	20.6490506969371	-1.49773402697311
TGGT1_217010:E004	TGGT1_217010	E004	0.0428904055474562	4.32745202931872e-09	2.23101430132214e-07	23.9367235482616	1.36922353169565
TGGT1_288640:E013	TGGT1_288640	E013	0.00551146753796131	4.3600881751518e-09	2.24640535303689e-07	181.968855131523	0.343864502800294
TGGT1_213920:E004	TGGT1_213920	E004	0.0110864433973243	4.36701378931199e-09	2.24853863699046e-07	90.0218733330248	0.625114200187525
TGGT1_301370:E012	TGGT1_301370	E012	0.122083063514791	4.39458295609266e-09	2.26129161861148e-07	8.13925308885238	2.47202460332171
TGGT1_215030:E009	TGGT1_215030	E009	0.0768731815835592	4.46480512316828e-09	2.29596204852861e-07	12.9293446690197	2.44290800588476
TGGT1_248425:E002	TGGT1_248425	E002	0.0580251404992052	4.59077509584525e-09	2.35923760256567e-07	17.132979806144	-1.25915791118947
TGGT1_238230:E003	TGGT1_238230	E003	0.00466912580822602	4.63307578152359e-09	2.37946166171315e-07	215.175733263739	-0.452958632717425
TGGT1_289950:E002	TGGT1_289950	E002	0.0337274352281092	4.67156381970195e-09	2.39770314674912e-07	29.4953181515859	1.20536466839636
TGGT1_242380:E006	TGGT1_242380	E006	0.00255888687927811	4.74295579177266e-09	2.43279883004299e-07	396.393538621455	0.179155344158493
TGGT1_212880:E014	TGGT1_212880	E014	0.120922231812837	4.82813068840055e-09	2.47491511827313e-07	8.21742285749626	3.10549644074958
TGGT1_313930:E002	TGGT1_313930	E002	0.00105427189510781	4.88236853871137e-09	2.50112959373644e-07	992.184001626577	-0.185443280372802
TGGT1_310100:E027	TGGT1_310100	E027	0.0716626273528551	4.90647890064497e-09	2.51188696286348e-07	13.8701295481388	2.41398650520828
TGGT1_291800:E007	TGGT1_291800	E007	0.00152942371214283	4.93521344852312e-09	2.52499656379286e-07	672.826520742809	-0.113857870925806
TGGT1_305990:E003	TGGT1_305990	E003	0.00179056846613929	5.02450033817747e-09	2.56905025207573e-07	2555.60876397167	0.193923063003334
TGGT1_270080:E007	TGGT1_270080	E007	0.020293172160769	5.09242824051052e-09	2.60182574622611e-07	49.0728239912483	0.850207938781584
TGGT1_314970:E012	TGGT1_314970	E012	0.0549430518592716	5.09504738314669e-09	2.60182574622611e-07	18.0950042217106	1.71133139625681
TGGT1_310330:E002	TGGT1_310330	E002	0.0286167358425437	5.14647466124154e-09	2.62642624383904e-07	34.7727385912425	1.00614403409107
TGGT1_203460:E002	TGGT1_203460	E002	0.0400516014066457	5.2015815700427e-09	2.6528723187454e-07	24.8317975924446	1.34183761265759
TGGT1_306350:E031	TGGT1_306350	E031	0.0146954962625265	5.30312589502666e-09	2.70295371928647e-07	67.8331369997973	1.08539542621914
TGGT1_236220:E026	TGGT1_236220	E026	0.0193844077133121	5.35602491597979e-09	2.72819351161911e-07	51.3797504365323	0.842878687137697
TGGT1_289950:E009	TGGT1_289950	E009	0.0656735812036067	5.45539546474626e-09	2.77705771025403e-07	15.1360299356804	1.90775955570443
TGGT1_309810:E002	TGGT1_309810	E002	0.00285487815618571	5.4687317992128e-09	2.78209238695302e-07	354.515176455698	0.310556792202385
TGGT1_268280:E021	TGGT1_268280	E021	0.0266714186670142	5.52553594062661e-09	2.80922005142625e-07	48.5004824108521	-0.992241431438679
TGGT1_289340:E002	TGGT1_289340	E002	0.0083041124024021	5.54246488739391e-09	2.81605350965228e-07	120.378652881843	-0.429565218738172
TGGT1_315570:E003	TGGT1_315570	E003	0.0182736001606311	5.60569686121566e-09	2.84638953515878e-07	54.5121220592818	-0.584595136526408
TGGT1_315150:E007	TGGT1_315150	E007	0.0255767688017176	5.63139942318266e-09	2.8576431956672e-07	38.914324182584	1.0016881892462
No_genes_on_ref_contig_697+No_genes_on_ref_contig_704+No_genes_on_ref_contig_703+No_genes_on_ref_contig_702+No_genes_on_ref_contig_701+No_genes_on_ref_contig_700+No_genes_on_ref_contig_699+No_genes_on_ref_contig_698:E002	No_genes_on_ref_contig_697+No_genes_on_ref_contig_704+No_genes_on_ref_contig_703+No_genes_on_ref_contig_702+No_genes_on_ref_contig_701+No_genes_on_ref_contig_700+No_genes_on_ref_contig_699+No_genes_on_ref_contig_698	E002	0.00526500163744374	5.67836487371579e-09	2.87966575426787e-07	246.053607869366	0.208242793550663
TGGT1_225460:E008	TGGT1_225460	E008	0.172736830215191	5.69277027353369e-09	2.88515887026831e-07	5.75174325741389	-2.24899218479691
TGGT1_217020:E003	TGGT1_217020	E003	0.0133306183253514	5.93018158220972e-09	3.00359604792786e-07	74.806184033465	0.636205067521076
TGGT1_213580:E002	TGGT1_213580	E002	0.027480378323484	6.01671410281536e-09	3.04551356169779e-07	382.036616655504	0.834316194482733
TGGT1_253120:E032	TGGT1_253120	E032	0.0880984340589393	6.03292630475217e-09	3.05180642364766e-07	11.2809285350517	-1.84269890827972
TGGT1_263730:E005	TGGT1_263730	E005	0.0264895576095733	6.12331737568361e-09	3.09559191187111e-07	37.5706980533585	0.969500100289955
TGGT1_255635:E007	TGGT1_255635	E007	0.0390836691536827	6.16424599643304e-09	3.1143329194119e-07	25.4476115464381	1.34936351338429
TGGT1_241880:E030	TGGT1_241880	E030	0.0352829329527993	6.17159094418775e-09	3.11609377660412e-07	28.1930113487521	1.29551125634072
TGGT1_202760:E010	TGGT1_202760	E010	0.0167518097391613	6.3383843901525e-09	3.19830914836851e-07	59.4799669954559	-0.780251026582022
TGGT1_257550:E016	TGGT1_257550	E016	0.0145159719301641	6.34575410336797e-09	3.20002784219496e-07	68.675141009665	0.711350403004006
TGGT1_304760:E004	TGGT1_304760	E004	0.015091004068493	6.37329881010165e-09	3.21191185663893e-07	66.0490624565735	0.74454381506358
TGGT1_260470:E038	TGGT1_260470	E038	0.016688079419338	6.3882328647687e-09	3.21742969642608e-07	59.7078424630746	-0.812583887247468
TGGT1_312100:E005	TGGT1_312100	E005	0.0374574585158096	6.43789799774237e-09	3.24042203770405e-07	26.5539880864059	1.39923753148627
TGGT1_270770:E004	TGGT1_270770	E004	0.0349828064680521	6.59745687309948e-09	3.31866467694509e-07	28.43525493751	1.22274874614812
TGGT1_265190:E029	TGGT1_265190	E029	0.024349315022397	6.66056763332562e-09	3.34832458204573e-07	40.8802996218937	0.92798720854767
TGGT1_205390:E001	TGGT1_205390	E001	0.00965852982993545	6.66811255781444e-09	3.35003153301275e-07	156.49206543301	0.444717221654902
TGGT1_263100:E029	TGGT1_263100	E029	0.0062137373546535	6.76313055997828e-09	3.39565513532243e-07	161.225281072124	0.454486283432268
TGGT1_286220:E017	TGGT1_286220	E017	0.0436963056979388	6.76965067536607e-09	3.39681632862448e-07	22.758054429094	1.52504255585914
TGGT1_304730:E019	TGGT1_304730	E019	0.0234467442326296	6.84015966482693e-09	3.43006391639629e-07	56.1563205101152	-0.888692868022556
TGGT1_292975:E037	TGGT1_292975	E037	0.0111991316402858	6.89478401611687e-09	3.45530966816384e-07	89.1117276882288	-0.61528137617347
TGGT1_305990:E019	TGGT1_305990	E019	0.00579883503755711	6.94504238261397e-09	3.47833744888548e-07	206.60522839934	-0.397386577833046
TGGT1_200470:E011	TGGT1_200470	E011	0.0110682714536398	6.96169206884701e-09	3.48451462602829e-07	90.1703857389669	-0.637806261245602
TGGT1_227620:E002	TGGT1_227620	E002	0.00440590393989539	7.0028978819403e-09	3.50296753716512e-07	3571.77159178406	-0.318005464867661
TGGT1_300100:E004	TGGT1_300100	E004	0.0511212641866704	7.29157569395247e-09	3.64511061084367e-07	31.8628592085089	1.38949012599191
TGGT1_268230:E001	TGGT1_268230	E001	0.00259729009485356	7.30345911010369e-09	3.64879190132563e-07	390.40991357029	0.265457526149755
TGGT1_295920:E001	TGGT1_295920	E001	0.0332590894294759	7.33763211260585e-09	3.66359757953762e-07	29.9113291411281	1.18323633075739
TGGT1_288420:E002	TGGT1_288420	E002	0.12152609589627	7.35722644162875e-09	3.67111048680406e-07	8.17657253338094	3.10866247055648
TGGT1_278830:E033	TGGT1_278830	E033	0.0434561561308839	7.42923970873819e-09	3.70475397087695e-07	22.8839753201671	1.39446427824792
TGGT1_286050:E004	TGGT1_286050	E004	0.00882406257900282	7.59793002518044e-09	3.78653629989471e-07	113.242408959184	-0.53293614433348
TGGT1_286610:E003	TGGT1_286610	E003	0.0401757276891938	7.65922901981465e-09	3.81473075209584e-07	24.7549759135131	1.17367110399048
TGGT1_214620:E040	TGGT1_214620	E040	0.0296627140607993	7.69187003431437e-09	3.82862593847331e-07	33.5443649501452	1.08449636043245
TGGT1_261790:E011	TGGT1_261790	E011	0.00145558304949098	7.78009129917301e-09	3.87015200886465e-07	708.253729374592	-0.12645559919883
TGGT1_283810:E022	TGGT1_283810	E022	0.0339959049569009	7.8922964809957e-09	3.92113573165039e-07	29.262024907357	1.16450289992678
TGGT1_297970:E001	TGGT1_297970	E001	0.0683904723879453	7.88795197447753e-09	3.92113573165039e-07	14.5342652707214	1.92316305923775
TGGT1_269430:E035	TGGT1_269430	E035	0.0371116895153185	7.94252329281521e-09	3.94123920126267e-07	26.8017464262962	-1.2048660495683
TGGT1_283840:E001	TGGT1_283840	E001	0.0219978921988898	7.94243792282402e-09	3.94123920126267e-07	45.2607182681833	1.92078771790635
TGGT1_225060:E022	TGGT1_225060	E022	0.025413488872154	8.1261242500182e-09	4.02986880420896e-07	39.1648707007715	1.00605522644069
TGGT1_227335:E006	TGGT1_227335	E006	0.00887668758066172	8.14333702711363e-09	4.03592581267047e-07	366.627151069357	-0.355898877968029
TGGT1_211020:E008	TGGT1_211020	E008	0.00914773351413631	8.24421206761547e-09	4.0834138728769e-07	109.212148348483	-0.555044055766266
TGGT1_211420:E005	TGGT1_211420	E005	0.000135864031187287	8.31489795346343e-09	4.11085907086877e-07	12017.5850648485	-0.0241757928896949
TGGT1_247600:E002	TGGT1_247600	E002	0.0488924250417318	8.31030690416605e-09	4.11085907086877e-07	20.3367710228024	1.51300898611464
TGGT1_280375:E014	TGGT1_280375	E014	0.018452311009535	8.30688645789831e-09	4.11085907086877e-07	98.5343136617757	0.723122523489367
TGGT1_244150:E016	TGGT1_244150	E016	0.058950903387521	8.33900057751748e-09	4.12025221313264e-07	16.863681001251	1.72960538161216
TGGT1_286440:E002	TGGT1_286440	E002	0.0350009110511791	8.37984325801282e-09	4.13789997208358e-07	28.4205241109573	1.24190942588718
TGGT1_233850:E003	TGGT1_233850	E003	0.0173974284300254	8.39642841909058e-09	4.14355530816184e-07	57.2658925197251	-0.744139281034758
TGGT1_280540:E022	TGGT1_280540	E022	0.0127493752254602	8.51918359335289e-09	4.20156559199356e-07	78.2308872792862	0.648073827722896
TGGT1_320050:E004	TGGT1_320050	E004	0.0749126886694674	8.53205688828738e-09	4.20534562195288e-07	63.1304925837485	1.62184729285078
TGGT1_225105:E002	TGGT1_225105	E002	0.011143497273837	8.61366263082663e-09	4.24297774557528e-07	89.5587564257057	0.946672745746332
TGGT1_213920:E024	TGGT1_213920	E024	0.052598629049827	8.70762005712043e-09	4.28664454458304e-07	18.9023504396406	1.52220052546635
TGGT1_240480:E001	TGGT1_240480	E001	0.0121422319303852	8.71911368209747e-09	4.28968703914771e-07	82.1598553835815	-0.179098276062531
TGGT1_202760:E019	TGGT1_202760	E019	0.0298352510682359	8.74422658458043e-09	4.29942224912364e-07	33.3500315441797	1.18890063818153
TGGT1_215940:E033	TGGT1_215940	E033	0.103553798963583	8.77513722413812e-09	4.31199454528783e-07	9.5963885866758	2.22756420027812
TGGT1_202572:E009	TGGT1_202572	E009	0.0291457142814541	8.99761992325795e-09	4.4126481081363e-07	34.1404783882923	1.32865961819345
TGGT1_203875:E002	TGGT1_203875	E002	0.028027495446052	9.00031645528721e-09	4.4126481081363e-07	35.5051793387508	0.99205954868227
TGGT1_216450:E009	TGGT1_216450	E009	0.0216929171482739	8.99359213177896e-09	4.4126481081363e-07	73.8137103492634	0.806225093862701
TGGT1_223060:E025	TGGT1_223060	E025	0.0668266697408316	9.00183493416793e-09	4.4126481081363e-07	14.8746508756626	14.3737893581099
TGGT1_299110:E006	TGGT1_299110	E006	0.0499776114885776	9.14143173851091e-09	4.47835856437305e-07	19.8947188358013	1.44143298552582
TGGT1_218760:E006	TGGT1_218760	E006	0.0147661575256643	9.15794305454815e-09	4.48372669805303e-07	67.5073574757948	0.689284428546784
TGGT1_206550:E028	TGGT1_206550	E028	0.0140998089726851	9.16576062487408e-09	4.48483444878309e-07	70.709801620467	1.2449404313493
TGGT1_238940:E006	TGGT1_238940	E006	0.0795566277687372	9.20803491707557e-09	4.5000647641047e-07	12.4929457801933	2.04806471985969
TGGT1_297120:E007	TGGT1_297120	E007	0.0695613366668155	9.20629801711142e-09	4.5000647641047e-07	17.0656759873881	1.73205976611417
TGGT1_246080:E018	TGGT1_246080	E018	0.029021840080711	9.28672218231511e-09	4.53577444276594e-07	77.6667527802081	0.925223992525447
TGGT1_241610:E004	TGGT1_241610	E004	0.0106637083111278	9.36706150710598e-09	4.57224734447522e-07	118.456636342309	-0.58960803721978
TGGT1_246560:E009	TGGT1_246560	E009	0.016863358307552	9.475851709765e-09	4.6225552132198e-07	81.7270476007345	0.754154076507988
TGGT1_268280:E019	TGGT1_268280	E019	0.0140536568792481	9.58592736218385e-09	4.6734290192386e-07	70.9428946608438	-0.719893753984315
TGGT1_314970:E013	TGGT1_314970	E013	0.0461111969924572	9.73040682905174e-09	4.74100419640007e-07	21.5648143840187	1.46574267045331
TGGT1_261500:E004	TGGT1_261500	E004	0.152910769206779	9.89306813118948e-09	4.81735136050412e-07	6.49776077637471	14.0333841973322
TGGT1_462962:E003	TGGT1_462962	E003	0.00953155138967281	9.94392471736765e-09	4.83919687797877e-07	104.789686779335	0.551593147227047
TGGT1_311090:E005	TGGT1_311090	E005	0.0161594326902603	9.99009187197615e-09	4.8587353450843e-07	61.6676047019621	0.741759891544841
TGGT1_297120:E014	TGGT1_297120	E014	0.0330985508434621	1.00644801697384e-08	4.89196752862027e-07	35.3939685364805	1.09740120946869
TGGT1_218790:E017	TGGT1_218790	E017	0.0113891986864728	1.01359926144092e-08	4.92376271795622e-07	87.6176179075879	0.594344545371455
TGGT1_294200:E018	TGGT1_294200	E018	0.0593896032124884	1.0161447357975e-08	4.93315966594173e-07	18.3479690710915	1.45420232279221
TGGT1_208050:E008	TGGT1_208050	E008	0.109685908174021	1.01834685011722e-08	4.94087938366671e-07	9.05963169801472	15.5283112241106
TGGT1_278830:E024	TGGT1_278830	E024	0.0270682055842779	1.02703726038959e-08	4.98005124429753e-07	36.7659519278636	1.03889948068918
TGGT1_204395:E003	TGGT1_204395	E003	0.0111969591095518	1.03137478971953e-08	4.99724090230844e-07	89.1291004831919	-0.534881820739887
TGGT1_262840:E002	TGGT1_262840	E002	0.043458119927179	1.03182022470405e-08	4.99724090230844e-07	22.8829399655941	1.30617134313224
TGGT1_249160:E001	TGGT1_249160	E001	0.0728934181524622	1.03943422026503e-08	5.03109842764372e-07	13.6357640838432	1.90772813739158
TGGT1_202580:E009	TGGT1_202580	E009	0.0514924603564476	1.04080228813424e-08	5.03470178145701e-07	19.308833631204	-1.38805431635268
TGGT1_234970:E029	TGGT1_234970	E029	0.050940753537891	1.04600668491598e-08	5.05684728782583e-07	22.0053776721875	1.38399592588558
TGGT1_239310:E005	TGGT1_239310	E005	0.068438048706956	1.05111998714334e-08	5.07852616170063e-07	14.5241535717964	1.80900698332789
TGGT1_297430:E013	TGGT1_297430	E013	0.0271419246981563	1.05891037108247e-08	5.11310579003248e-07	89.6641667878769	0.868756819542987
TGGT1_310100:E020	TGGT1_310100	E020	0.0839731336215569	1.07394472703962e-08	5.18260176554357e-07	11.8354717310316	2.80314046556802
TGGT1_227370:E007	TGGT1_227370	E007	0.0424850903213322	1.07509015994577e-08	5.18503011130357e-07	23.4076817622057	-1.79342830004958
TGGT1_310045:E003	TGGT1_310045	E003	0.00582610346026464	1.07757399086117e-08	5.19390663595082e-07	172.051125528964	-0.417967770078745
TGGT1_315770:E024	TGGT1_315770	E024	0.0258733656246872	1.08465002671435e-08	5.22489378918754e-07	38.4673141918847	1.0079256013448
TGGT1_225140:E001	TGGT1_225140	E001	0.0396178837713562	1.08628642464973e-08	5.22965620119832e-07	25.1040098740475	-0.348754245069688
TGGT1_238995:E020	TGGT1_238995	E020	0.161292066203741	1.09049591741787e-08	5.24679308061573e-07	6.16000307867945	14.7765674907032
TGGT1_308090:E004	TGGT1_308090	E004	0.000156222421102906	1.09427278163019e-08	5.2618292450812e-07	9642.41009071858	-0.0174946220624565
TGGT1_270000:E035	TGGT1_270000	E035	0.0268235742431732	1.11626062613468e-08	5.36436319351091e-07	37.1019244235451	-0.971405483282928
TGGT1_202460:E015	TGGT1_202460	E015	0.0469744180080599	1.12580792828758e-08	5.40702576384877e-07	21.1680811353194	1.38190554546243
TGGT1_281920:E012	TGGT1_281920	E012	0.0341677150872934	1.13133861049477e-08	5.43035806886415e-07	29.1146531908139	1.13615545112327
TGGT1_233838:E002	TGGT1_233838	E002	0.054818021609105	1.13757642480743e-08	5.45381429078551e-07	18.1363158427842	1.60902277979282
TGGT1_289350:E038	TGGT1_289350	E038	0.00174465566002838	1.13697709776466e-08	5.45381429078551e-07	587.21084592607	0.209637821327141
TGGT1_255635:E011	TGGT1_255635	E011	0.0541376109024123	1.1489700150691e-08	5.50516879327025e-07	18.364480426346	1.68549647906644
TGGT1_200350:E006	TGGT1_200350	E006	0.00654785146390699	1.15307636085488e-08	5.52156702216008e-07	152.931106588333	-0.501614399137569
TGGT1_238150:E002	TGGT1_238150	E002	0.0341011099700526	1.16085783340324e-08	5.5555339170012e-07	2036.14279652212	-0.336858834074942
TGGT1_223060:E030	TGGT1_223060	E030	0.053798787875792	1.16485770957421e-08	5.57137364825084e-07	18.4802538492208	2.63618855191298
TGGT1_234250:E004	TGGT1_234250	E004	0.0066062983155677	1.1842828009594e-08	5.66092788250188e-07	151.567116173478	-0.487133814629834
TGGT1_280390:E015	TGGT1_280390	E015	0.0584395035978161	1.18519614448853e-08	5.6619414630344e-07	17.0113883354056	1.81107042127437
TGGT1_290010:E003	TGGT1_290010	E003	0.0200104988358735	1.20086395965728e-08	5.73339750342579e-07	130.985451829616	-0.000375498726017979
TGGT1_278510:E021	TGGT1_278510	E021	0.0113195500193434	1.20444318821582e-08	5.74708751776622e-07	282.00554158744	-0.558544647057609
TGGT1_223060:E024	TGGT1_223060	E024	0.0553285879217836	1.20790159976793e-08	5.76018521306933e-07	17.968794728866	2.61540505430249
TGGT1_240640:E011	TGGT1_240640	E011	0.00674868690447647	1.2255218903132e-08	5.84076209058067e-07	148.343828737874	-0.472607704229368
TGGT1_231200:E015	TGGT1_231200	E015	0.07335491607076	1.24178147459768e-08	5.91476267561321e-07	13.5499150964631	1.98843836054927
TGGT1_202760:E001	TGGT1_202760	E001	0.00874790127791325	1.24838222425359e-08	5.94043286465257e-07	114.234358495983	-0.528584667486476
TGGT1_243545:E003	TGGT1_243545	E003	0.000433670109397481	1.24864241918814e-08	5.94043286465257e-07	2610.64696272091	-0.0795529542084774
TGGT1_223060:E014	TGGT1_223060	E014	0.0266432249842518	1.25326388594719e-08	5.95890811731134e-07	37.3535717447241	-0.95149001250644
TGGT1_297850:E003	TGGT1_297850	E003	0.0801709928361518	1.2604222497685e-08	5.98626098974742e-07	12.397146448721	1.90343730286148
TGGT1_306980:E009	TGGT1_306980	E009	0.0134893951579725	1.26049962006201e-08	5.98626098974742e-07	73.9221909972431	0.623431004208293
TGGT1_224830:E003	TGGT1_224830	E003	0.0146740258251577	1.26294892729837e-08	5.99436693976685e-07	67.9327489309931	-0.737094568172991
TGGT1_320080:E022	TGGT1_320080	E022	0.0168070365288544	1.26512723098528e-08	6.00117784921251e-07	59.2838990246437	0.777204774516347
TGGT1_244840:E011	TGGT1_244840	E011	0.0192736605141756	1.27084475917517e-08	6.02475934421653e-07	51.6757978769544	0.83491965516324
TGGT1_220880:E010	TGGT1_220880	E010	0.00731228039806998	1.27751017764489e-08	6.05280423662913e-07	136.826419589349	-0.492472923238422
TGGT1_226940:E008	TGGT1_226940	E008	0.0231014361884904	1.28653430567486e-08	6.08841425373155e-07	43.0936445059488	0.939277122994646
TGGT1_263860:E004	TGGT1_263860	E004	0.0197280163975348	1.2860846702409e-08	6.08841425373155e-07	50.4824336692994	0.816628644911015
TGGT1_262700:E017	TGGT1_262700	E017	0.00825745959844194	1.28925936491987e-08	6.09773607655567e-07	121.063176873436	-0.476548050431439
TGGT1_305320:E008	TGGT1_305320	E008	0.0478684332787629	1.29578504765343e-08	6.12501205048592e-07	20.7722952580333	1.40392303274651
TGGT1_308000:E003	TGGT1_308000	E003	0.101770648497164	1.29722906616435e-08	6.12824977511872e-07	9.76461741761667	2.56059892291576
TGGT1_216860:E010	TGGT1_216860	E010	0.00560982997446281	1.29850962957814e-08	6.13071198502874e-07	194.764898322012	0.447272149710601
TGGT1_299110:E017	TGGT1_299110	E017	0.0647470950393137	1.29954600791837e-08	6.13201910866685e-07	15.3527942183088	1.66637776385147
TGGT1_253890:E017	TGGT1_253890	E017	0.00455480889686675	1.30307019989907e-08	6.14505681009644e-07	220.640071076764	0.390412539534718
TGGT1_217680:E014	TGGT1_217680	E014	0.037953192894032	1.30721717080979e-08	6.16101449418145e-07	26.2066600458022	1.21490280658905
TGGT1_309830:E008	TGGT1_309830	E008	0.0323045671327265	1.32532572476663e-08	6.24271717555624e-07	30.7965953217813	0.858063395105086
TGGT1_228770:E004	TGGT1_228770	E004	0.0648525007862277	1.33887065698801e-08	6.30284096162837e-07	17.9757637328615	1.73066103268617
TGGT1_304955:E007	TGGT1_304955	E007	0.00183649142630825	1.34633183844183e-08	6.33427161868305e-07	556.97045120052	0.223144149204692
TGGT1_314090:E012	TGGT1_314090	E012	0.0134775958498132	1.35358653077663e-08	6.36469473280439e-07	244.478745813605	0.611693518602365
TGGT1_216250:E013	TGGT1_216250	E013	0.0874009035721838	1.35872566769351e-08	6.38514067411152e-07	11.3710143950819	2.45587963801681
TGGT1_462962:E011	TGGT1_462962	E011	0.0117250305924835	1.40245871358596e-08	6.5868239814638e-07	85.0966053473951	-0.583866320527725
TGGT1_288360:E010	TGGT1_288360	E010	0.0197408632244652	1.4082484776727e-08	6.61017097935496e-07	50.4494922479449	0.833021612728185
TGGT1_221940:E001	TGGT1_221940	E001	0.00175100912399967	1.42277489711393e-08	6.67447596272475e-07	585.01339175925	0.196310528155522
TGGT1_278660:E009	TGGT1_278660	E009	0.0411603156471471	1.4259257096832e-08	6.68537236766976e-07	32.2505779733183	1.23164457033427
TGGT1_263860:E009	TGGT1_263860	E009	0.0040565638759337	1.43656107172647e-08	6.73132664688544e-07	248.100290750502	-0.281770947405596
TGGT1_241880:E012	TGGT1_241880	E012	0.0522685228363652	1.44284295686565e-08	6.75292325348106e-07	19.0218514765325	1.6846442562518
TGGT1_298060:E049	TGGT1_298060	E049	0.0213754348398813	1.44248989191112e-08	6.75292325348106e-07	46.5820097877982	-0.861710706227562
TGGT1_224940:E013	TGGT1_224940	E013	0.062926323112372	1.4563622807105e-08	6.80935737167318e-07	15.7974030172072	1.82173893705655
TGGT1_261060:E003	TGGT1_261060	E003	0.0437673888307066	1.45658762381614e-08	6.80935737167318e-07	22.7210478087374	1.54662845850678
TGGT1_280380:E005	TGGT1_280380	E005	0.00515255348765172	1.46702887622832e-08	6.85420001865126e-07	536.849712547016	-0.366103193798993
TGGT1_216680:E009	TGGT1_216680	E009	0.00566704738326927	1.46909134103961e-08	6.85986636314823e-07	400.532923700969	-0.457762756066578
TGGT1_289320:E032	TGGT1_289320	E032	0.00510997048945443	1.49791214838233e-08	6.99040099997963e-07	196.416848586581	-0.388142164182844
TGGT1_314330:E030	TGGT1_314330	E030	0.0171375282167848	1.50579519326266e-08	7.02312968966268e-07	60.1725032287408	0.829699011471992
TGGT1_223060:E006	TGGT1_223060	E006	0.0391045247048292	1.51773398223562e-08	7.07472592700882e-07	25.4340211193967	1.69181986711566
TGGT1_281920:E003	TGGT1_281920	E003	0.0156932853437107	1.52257574302088e-08	7.09319980454647e-07	63.5055882397359	0.713134491675075
TGGT1_207430:E006	TGGT1_207430	E006	0.109894608181767	1.52627055634654e-08	7.10631218954084e-07	9.04241828542927	2.94498505712583
TGGT1_263040:E006	TGGT1_263040	E006	0.0431166049394313	1.52835902522044e-08	7.11193463407335e-07	334.039416998321	1.00710513346311
TGGT1_227970:E003	TGGT1_227970	E003	0.0259099990419063	1.53556114524699e-08	7.14133231921172e-07	91.9484886656368	0.845354467401421
TGGT1_298980:E016	TGGT1_298980	E016	0.0770127635863456	1.53849589030121e-08	7.15086158338906e-07	12.9058946374619	1.87585390795852
TGGT1_312260:E002	TGGT1_312260	E002	0.0149193607850942	1.54644566030158e-08	7.18367608656201e-07	66.8116594834437	0.72657541599955
TGGT1_219550:E005	TGGT1_219550	E005	0.00853720172977994	1.55191737430212e-08	7.19667140805751e-07	117.071365534239	-0.525194512155685
TGGT1_278500:E020	TGGT1_278500	E020	0.0335372314400865	1.55134917542665e-08	7.19667140805751e-07	29.6628644013048	1.1697942972036
TGGT1_300010:E021	TGGT1_300010	E021	0.0373556924107983	1.55091818801793e-08	7.19667140805751e-07	26.6264308888042	1.22835088776431
TGGT1_313130:E019	TGGT1_313130	E019	0.0634908394406108	1.56292678564952e-08	7.24356452579874e-07	15.6568256840869	2.64644181803552
TGGT1_217010:E010	TGGT1_217010	E010	0.0521783884398316	1.57257951160428e-08	7.28411972859274e-07	19.0547438971783	1.48893736021358
TGGT1_300240:E008	TGGT1_300240	E008	0.0256349211093862	1.5818375757541e-08	7.32280141505204e-07	38.8258641785431	0.972956843649793
TGGT1_312075:E003	TGGT1_312075	E003	0.00596200938392453	1.58872015521071e-08	7.3504482367299e-07	168.093842725018	-0.264840226222657
TGGT1_255450:E006	TGGT1_255450	E006	0.0211484477211435	1.60018212881914e-08	7.39923849772124e-07	47.0832375647768	0.875279215495737
TGGT1_230960:E021	TGGT1_230960	E021	0.0305675800739472	1.61645639780531e-08	7.47021220817467e-07	32.5496479856637	1.07793148322895
TGGT1_321500:E002	TGGT1_321500	E002	0.0165996091091698	1.61869418569317e-08	7.47627431818867e-07	60.0270885520778	0.778656421601628
TGGT1_309280:E010	TGGT1_309280	E010	0.0398485144222129	1.62315342645447e-08	7.49258386991434e-07	24.9585214786627	1.73454675018637
TGGT1_230150:E015	TGGT1_230150	E015	0.00881161680545533	1.62808212181845e-08	7.51104057742929e-07	179.01495935289	-0.460436530760459
TGGT1_215230:E003	TGGT1_215230	E003	0.0364811658657204	1.6833670946421e-08	7.76165861712906e-07	27.2656521622686	1.1813908020337
TGGT1_246475:E007	TGGT1_246475	E007	0.0508609086926637	1.73974987032313e-08	8.01704941669735e-07	19.5488470094525	1.51703126729436
TGGT1_254830:E010	TGGT1_254830	E010	0.0240580861879324	1.75629639594251e-08	8.08868166151847e-07	41.3762623924829	0.966512754067287
TGGT1_268280:E010	TGGT1_268280	E010	0.0024553944486211	1.75972285888909e-08	8.09984179090141e-07	413.471257344374	-0.263250780097698
TGGT1_249390:E029	TGGT1_249390	E029	0.0478510184281615	1.76974440865813e-08	8.1413284805136e-07	20.7798635226582	1.47505090412295
TGGT1_217740:E010	TGGT1_217740	E010	0.0435108641863809	1.78763864604791e-08	8.21896390026641e-07	22.855167093328	1.28671180718806
TGGT1_232035:E003	TGGT1_232035	E003	0.00673489815826175	1.80115704113488e-08	8.27640374024046e-07	367.857358020296	0.218696643600267
TGGT1_313130:E023	TGGT1_313130	E023	0.0478856591931768	1.80250617788991e-08	8.2778917105769e-07	20.7648145241397	1.82901817799154
TGGT1_247420:E004	TGGT1_247420	E004	0.00722792401627056	1.80694198487638e-08	8.2897834300549e-07	138.43515145522	0.46671501207731
TGGT1_266900:E010	TGGT1_266900	E010	0.00235066942216003	1.80714917159802e-08	8.2897834300549e-07	432.318553530243	-0.248811645400125
TGGT1_300240:E002	TGGT1_300240	E002	0.0259890135909369	1.82011756763687e-08	8.3445310518548e-07	38.2957880759731	0.969195848084271
TGGT1_268280:E028	TGGT1_268280	E028	0.00733378153002821	1.82358965784843e-08	8.35096489089013e-07	136.422340699976	0.490666319379964
TGGT1_313180:E023	TGGT1_313180	E023	0.0245206187874118	1.82272743057074e-08	8.35096489089013e-07	40.5940841517957	0.947330241429032
TGGT1_213115:E001	TGGT1_213115	E001	0.0104057301004528	1.83892675719204e-08	8.4164258357086e-07	95.9411200563947	0.525875737612377
TGGT1_272695:E011	TGGT1_272695	E011	0.0187565420012538	1.89744075495236e-08	8.67931327768154e-07	53.1045550672182	0.823468228625312
TGGT1_251510:E010	TGGT1_251510	E010	0.0360506859777872	1.90329499125826e-08	8.70116201128177e-07	27.5917116002884	1.30442775318592
TGGT1_224820:E002	TGGT1_224820	E002	0.0303791212824961	1.91650738596501e-08	8.75660576151019e-07	458.614841257149	-0.275462215750255
TGGT1_221685:E002	TGGT1_221685	E002	0.0233019249825399	1.92232949157919e-08	8.77823933838495e-07	42.7220198810852	-0.486927894630442
TGGT1_230960:E019	TGGT1_230960	E019	0.0351064012249103	1.98152739014666e-08	9.04344905842233e-07	28.3349944795691	1.15622050953735
TGGT1_239820:E020	TGGT1_239820	E020	0.00461579591619365	1.99315135349828e-08	9.09136014263748e-07	217.690823059559	-0.415095645772356
TGGT1_266372:E012	TGGT1_266372	E012	0.0527899579366377	2.01221722112184e-08	9.17314270735585e-07	18.8337727171059	1.42568414090566
TGGT1_214940:E002	TGGT1_214940	E002	0.01941527367626	2.0185289574705e-08	9.19672321565356e-07	268.276525693813	0.685054826631242
TGGT1_269430:E012	TGGT1_269430	E012	0.00752434772830567	2.04551154950808e-08	9.31440355045319e-07	132.942615382112	-0.563807850953965
TGGT1_232440:E001	TGGT1_232440	E001	0.000456754458003984	2.06159928709859e-08	9.38236857068232e-07	2461.30541258279	0.0986941373293194
TGGT1_217010:E002	TGGT1_217010	E002	0.0460572366503344	2.08992459517595e-08	9.50591899670593e-07	21.590108798315	1.33688809597924
TGGT1_309610:E015	TGGT1_309610	E015	0.00686103858513223	2.12292311941041e-08	9.65057421427924e-07	145.895662992717	0.458589752348433
TGGT1_239820:E018	TGGT1_239820	E018	0.00322441635378235	2.12657120636501e-08	9.66171785851879e-07	502.983851838226	0.294629939452727
TGGT1_218910:E002	TGGT1_218910	E002	0.0247429817034383	2.15941360899723e-08	9.80147583030026e-07	40.2284825105779	1.0310773303892
TGGT1_288640:E020	TGGT1_288640	E020	0.00722905533442394	2.15976038918736e-08	9.80147583030026e-07	138.413326245813	0.38968721753727
TGGT1_307810:E008	TGGT1_307810	E008	0.00648372009909808	2.1830735724679e-08	9.90171038613462e-07	154.456287223235	0.450532506895748
TGGT1_311335:E042	TGGT1_311335	E042	0.0055155069763268	2.18721960821922e-08	9.9149452593812e-07	181.834286695906	-0.439760116472941
TGGT1_203300:E029	TGGT1_203300	E029	0.000343776725374921	2.21854939742042e-08	1.00513235466183e-06	3418.32580706022	0.076894185033515
TGGT1_205150:E026	TGGT1_205150	E026	0.00786506888616865	2.23486802939735e-08	1.01195776978909e-06	127.144200908126	0.782858504268356
TGGT1_248380:E003	TGGT1_248380	E003	0.0222877564659724	2.2388101345954e-08	1.01317453036188e-06	44.6706694274209	0.761718490772237
TGGT1_238250:E001	TGGT1_238250	E001	0.000188507272013743	2.2635999216377e-08	1.0238192698791e-06	7341.42369798213	-0.0271094089937868
TGGT1_240610:E006	TGGT1_240610	E006	0.0335884735661704	2.27689160384371e-08	1.02925444365242e-06	29.6175393213689	1.18322135860702
TGGT1_309980:E089	TGGT1_309980	E089	0.00966529140680795	2.30255558426586e-08	1.0402732238148e-06	103.331669268938	0.572841371157376
TGGT1_309280:E025	TGGT1_309280	E025	0.00592343704851659	2.3049357251446e-08	1.04076613965072e-06	169.198361930991	-0.417102382493843
TGGT1_309280:E026	TGGT1_309280	E026	0.00987358134065278	2.30635611205995e-08	1.04082538125858e-06	101.140004760329	-0.565004079676245
TGGT1_301410:E001	TGGT1_301410	E001	0.00639427289452608	2.32033088183248e-08	1.04654700416059e-06	446.352031441668	-0.359346718571555
TGGT1_204140:E012	TGGT1_204140	E012	0.0198540701423899	2.32902079892627e-08	1.0498799229554e-06	50.1610586562666	0.852001029670603
TGGT1_235930:E012	TGGT1_235930	E012	0.00285056179480211	2.36022799363313e-08	1.0633538340735e-06	355.062200540528	0.320098873434017
TGGT1_202160:E011	TGGT1_202160	E011	0.0183160647316063	2.36845328829337e-08	1.06646445192618e-06	54.38537108585	0.82425152513443
TGGT1_202640:E021	TGGT1_202640	E021	0.0407325959454679	2.37565738043834e-08	1.06851642679493e-06	24.4161000449235	1.33683145596096
TGGT1_279400:E002	TGGT1_279400	E002	0.0900074871779725	2.37471745221355e-08	1.06851642679493e-06	11.0415192053758	2.07670244127761
TGGT1_213920:E017	TGGT1_213920	E017	0.0168247868063542	2.41122615094512e-08	1.08391059741957e-06	59.2211556084005	0.749073378382426
TGGT1_235920:E059	TGGT1_235920	E059	0.0269214019439933	2.41588880960597e-08	1.08540224286888e-06	36.9668354396198	-0.959692638664993
TGGT1_201230:E019	TGGT1_201230	E019	0.0413372712554858	2.43576743048933e-08	1.09372460233902e-06	24.0584846723264	1.30679455010137
TGGT1_315210:E026	TGGT1_315210	E026	0.0229302717152033	2.44199795924673e-08	1.09591275842015e-06	43.4160680293333	0.89182523779818
TGGT1_285830:E028	TGGT1_285830	E028	0.0314744454913018	2.44768497636958e-08	1.0978547031511e-06	31.6102146655366	1.1277935461962
TGGT1_240880:E002	TGGT1_240880	E002	0.0075817404461658	2.45512303219797e-08	1.10057944477792e-06	900.610156015622	-0.172471954454317
TGGT1_290670:E004	TGGT1_290670	E004	0.0397882284913004	2.46922005702598e-08	1.10628457993337e-06	56.7171932041532	1.05681353794267
TGGT1_299010:E009	TGGT1_299010	E009	0.0128176137659437	2.47725371688831e-08	1.10926832408751e-06	77.8126645323509	-0.646480385529993
TGGT1_309610:E005	TGGT1_309610	E005	0.0316269930328886	2.51477093233636e-08	1.12544363205197e-06	31.4574910777017	1.3248069943639
TGGT1_203940:E022	TGGT1_203940	E022	0.0358674611034621	2.53468569340439e-08	1.13372769782273e-06	27.7328701770353	1.15981969321782
TGGT1_213060:E024	TGGT1_213060	E024	0.010566375205765	2.55031885936989e-08	1.14008855543316e-06	94.4751029647561	-0.575120500024902
TGGT1_295935:E010	TGGT1_295935	E010	0.000612760081937985	2.55586325406958e-08	1.14193480806479e-06	1775.07285145942	-0.0956975952828912
TGGT1_263060:E014	TGGT1_263060	E014	0.022693193736402	2.57137490957093e-08	1.14822983033302e-06	43.8707060019253	0.92007915726564
TGGT1_203590:E007	TGGT1_203590	E007	0.0110531378579082	2.58421271296835e-08	1.15332456263958e-06	90.2944413605428	0.653544250538743
TGGT1_256830:E028	TGGT1_256830	E028	0.0108556464738083	2.59295941081862e-08	1.15658882890852e-06	120.233559349443	-0.567152138470754
TGGT1_298060:E047	TGGT1_298060	E047	0.0176044948894261	2.62755649573877e-08	1.17137368130022e-06	56.5902810405363	-0.7505782097996
TGGT1_304730:E004	TGGT1_304730	E004	0.0053827002018658	2.66698124382845e-08	1.18829321589674e-06	186.365461460202	0.403026991966747
TGGT1_263300:E003	TGGT1_263300	E003	0.0172717480379114	2.74476041722199e-08	1.22227375777395e-06	112.241552354836	0.694066503563473
TGGT1_304700:E035	TGGT1_304700	E035	0.0435253481455276	2.80688161127104e-08	1.24924799826884e-06	22.8475522539166	2.07047535186842
TGGT1_211680:E004	TGGT1_211680	E004	0.00630491169888028	2.87802457545297e-08	1.28020558732339e-06	158.873981588328	0.444594794600862
TGGT1_263090:E007	TGGT1_263090	E007	0.0151060604402487	2.94256200995019e-08	1.30819242220996e-06	65.9829979176731	0.721472232900458
TGGT1_236860:E001	TGGT1_236860	E001	0.00432137781812728	2.96002458251692e-08	1.31523161623282e-06	232.707150517813	0.132491681289231
TGGT1_297500:E018	TGGT1_297500	E018	0.022810513419797	2.99281691832487e-08	1.32834015338625e-06	43.6445413038695	0.913789378885216
TGGT1_311060:E003	TGGT1_311060	E003	0.0301665660418211	2.99167684254146e-08	1.32834015338625e-06	32.9831057540702	1.04224438043362
TGGT1_295400:E007	TGGT1_295400	E007	0.00394679218408612	3.018367100556e-08	1.33894432891972e-06	272.844905414434	-0.206440886053058
TGGT1_217182:E028	TGGT1_217182	E028	0.0480388748614387	3.03928257400602e-08	1.34748203521349e-06	20.6985135709441	1.40552612291397
TGGT1_203540:E012	TGGT1_203540	E012	0.017802692848491	3.04107191850527e-08	1.3475353531313e-06	78.0040746855778	0.733745011798825
TGGT1_225125:E010	TGGT1_225125	E010	0.0416475809868614	3.06958826667495e-08	1.35942517120133e-06	23.8789992567557	1.55638371968064
TGGT1_205100:E006	TGGT1_205100	E006	0.049422147135972	3.07202091126221e-08	1.35975662429142e-06	20.118560163243	1.40576446606058
No_genes_on_ref_contig_888+No_genes_on_ref_contig_889+No_genes_on_ref_contig_898+No_genes_on_ref_contig_897+No_genes_on_ref_contig_896+No_genes_on_ref_contig_895+No_genes_on_ref_contig_894+No_genes_on_ref_contig_893+No_genes_on_ref_contig_885+No_genes_on_ref_contig_886+No_genes_on_ref_contig_887+No_genes_on_ref_contig_884+No_genes_on_ref_contig_892+No_genes_on_ref_contig_891+No_genes_on_ref_conti…	No_genes_on_ref_contig_888+No_genes_on_ref_contig_889+No_genes_on_ref_contig_898+No_genes_on_ref_contig_897+No_genes_on_ref_contig_896+No_genes_on_ref_contig_895+No_genes_on_ref_contig_894+No_genes_on_ref_contig_893+No_genes_on_ref_contig_885+No_genes_on_ref_contig_886+No_genes_on_ref_contig_887+No_genes_on_ref_contig_884+No_genes_on_ref_contig_892+No_genes_on_ref_contig_891+No_genes_on_ref_conti…	E031	0.0210869631994103	3.08284151293273e-08	1.36379840847465e-06	47.2208683108429	0.90153229804968
TGGT1_249535:E001	TGGT1_249535	E001	0.0164524224073551	3.12502358441457e-08	1.38170196652634e-06	60.5658456645425	-0.233383292380594
TGGT1_213240:E004	TGGT1_213240	E004	0.00270054723804555	3.13555211671527e-08	1.38408310630403e-06	677.664608183713	-0.0902562303570606
TGGT1_238150:E001	TGGT1_238150	E001	0.0377174434140779	3.13370003089515e-08	1.38408310630403e-06	26.3706938485127	0.879952212363712
TGGT1_309110:E002	TGGT1_309110	E002	0.00939357933164768	3.1342051131343e-08	1.38408310630403e-06	106.337597493815	0.548577748928688
TGGT1_233695:E007	TGGT1_233695	E007	0.0576127063197025	3.1514309904695e-08	1.38957280729413e-06	17.2557436876237	1.39249919626635
TGGT1_237010:E016	TGGT1_237010	E016	0.0435575917750869	3.14981076143243e-08	1.38957280729413e-06	22.8306186008031	1.4095805760291
No_genes_on_ref_contig_276+No_genes_on_ref_contig_275+No_genes_on_ref_contig_274:E003	No_genes_on_ref_contig_276+No_genes_on_ref_contig_275+No_genes_on_ref_contig_274	E003	0.00193855279339063	3.1759527219775e-08	1.39962086795226e-06	1909.90575026137	0.0528383222014798
TGGT1_207400:E015	TGGT1_207400	E015	0.00541166294572929	3.17978168326454e-08	1.40054377631404e-06	209.40395049044	0.0277742318195551
TGGT1_246978:E014	TGGT1_246978	E014	0.0292646841609992	3.18473224033606e-08	1.40195941888513e-06	34.0014340733973	1.06114500970314
TGGT1_309600:E013	TGGT1_309600	E013	0.0428511958689312	3.18898514914206e-08	1.40306657229419e-06	23.2074460935751	1.21459120736183
TGGT1_216780:E018	TGGT1_216780	E018	0.0370204111537827	3.19931380764695e-08	1.40684422799769e-06	26.8679245466138	1.17372650743564
TGGT1_202760:E009	TGGT1_202760	E009	0.00672087978810114	3.21995813204267e-08	1.41515144142877e-06	148.962488306478	-0.446290242956714
TGGT1_207630:E013	TGGT1_207630	E013	0.124398935667995	3.25223259360193e-08	1.42855820698831e-06	7.98766387773537	2.99084738080318
TGGT1_201710:E011	TGGT1_201710	E011	0.0475993841046166	3.27736345226404e-08	1.43881423772995e-06	20.8898393017879	1.34737861107635
TGGT1_283780:E017	TGGT1_283780	E017	0.0156884437992064	3.29861727748567e-08	1.4473579668359e-06	63.5252531357195	0.698866445424374
TGGT1_305140:E012	TGGT1_305140	E012	0.0407911451883621	3.3277232488394e-08	1.45933588536148e-06	24.3810088119007	1.20198148735185
TGGT1_267720:E013	TGGT1_267720	E013	0.0325489393799576	3.34646323632913e-08	1.46675737994046e-06	30.5650007492286	1.0557109159235
TGGT1_211630:E006	TGGT1_211630	E006	0.00600392927716684	3.36682172724693e-08	1.47487982718004e-06	166.909703041319	0.419312863788864
TGGT1_305040:E015	TGGT1_305040	E015	0.0207704427498955	3.40448400075971e-08	1.49056950000724e-06	47.9423147920939	0.8570864967302
TGGT1_316150:E019	TGGT1_316150	E019	0.00318140701678094	3.41345162657326e-08	1.49368572938424e-06	317.509945752604	-0.241848537625881
TGGT1_242000:E019	TGGT1_242000	E019	0.0755175208243321	3.42958559016466e-08	1.49830948388498e-06	13.1616108405708	1.85220474776521
TGGT1_285830:E038	TGGT1_285830	E038	0.0630483905491927	3.42773974874993e-08	1.49830948388498e-06	15.7667919663884	1.74137283884544
TGGT1_297150:E005	TGGT1_297150	E005	0.0105880267964317	3.42914236636687e-08	1.49830948388498e-06	94.2809337230222	-0.544184138806455
TGGT1_228460:E020	TGGT1_228460	E020	0.0423165234367995	3.4332017463139e-08	1.49907811243187e-06	23.5010431248632	1.24883284206385
TGGT1_226910:E024	TGGT1_226910	E024	0.0356697321624309	3.45960754539784e-08	1.50979143339295e-06	27.8868322040999	1.23419338488746
TGGT1_236930:E010	TGGT1_236930	E010	0.00809490993048797	3.47765037548664e-08	1.51684550548306e-06	177.025155682585	0.442680209339963
TGGT1_216260:E004	TGGT1_216260	E004	0.0146311034751248	3.4805636148019e-08	1.51729645486518e-06	68.1327664711779	-0.68436056989903
TGGT1_242800:E002	TGGT1_242800	E002	0.0175439987293199	3.48628482821562e-08	1.51897034865617e-06	56.7860123992502	0.778655825735325
TGGT1_259115:E017	TGGT1_259115	E017	0.00527757909002775	3.53508951782073e-08	1.53940373366374e-06	190.115381504724	0.390178251851169
TGGT1_277550:E001	TGGT1_277550	E001	0.00930471923662588	3.60644478062972e-08	1.56962975398458e-06	107.358963276232	0.445026489240997
TGGT1_226970:E002	TGGT1_226970	E002	0.000159023704704012	3.64509891582587e-08	1.58559838884268e-06	9387.12545547719	-0.0299789372629859
TGGT1_209160:E016	TGGT1_209160	E016	0.0753329947558836	3.67887123468063e-08	1.59942740512623e-06	13.1938726290277	1.68124675988802
TGGT1_300010:E020	TGGT1_300010	E020	0.0260897603835048	3.71048502790776e-08	1.61230359918263e-06	38.1476049017712	0.96259125991992
TGGT1_246330:E006	TGGT1_246330	E006	0.0318469047715503	3.78400557219735e-08	1.64336573357371e-06	40.4829190521838	1.00152617655742
TGGT1_293680:E006	TGGT1_293680	E006	0.0178638677625092	3.79401437835419e-08	1.64682661740014e-06	55.7661683783012	0.759925630794901
TGGT1_280390:E007	TGGT1_280390	E007	0.0612857325043229	3.84502899528902e-08	1.66807316461397e-06	16.2206596858578	1.77351922672299
TGGT1_319540:E026	TGGT1_319540	E026	0.031801933109461	3.85485250294353e-08	1.6714367176431e-06	31.2841557001151	1.13865306280106
TGGT1_217020:E040	TGGT1_217020	E040	0.00669460599085384	3.86157747636386e-08	1.67345387844464e-06	321.954177595699	0.36339855920847
No_genes_on_ref_contig_696+No_genes_on_ref_contig_695+No_genes_on_ref_contig_687+No_genes_on_ref_contig_686+No_genes_on_ref_contig_694+No_genes_on_ref_contig_684+No_genes_on_ref_contig_685+No_genes_on_ref_contig_691+No_genes_on_ref_contig_690+No_genes_on_ref_contig_693+No_genes_on_ref_contig_692+No_genes_on_ref_contig_688+No_genes_on_ref_contig_689:E005	No_genes_on_ref_contig_696+No_genes_on_ref_contig_695+No_genes_on_ref_contig_687+No_genes_on_ref_contig_686+No_genes_on_ref_contig_694+No_genes_on_ref_contig_684+No_genes_on_ref_contig_685+No_genes_on_ref_contig_691+No_genes_on_ref_contig_690+No_genes_on_ref_contig_693+No_genes_on_ref_contig_692+No_genes_on_ref_contig_688+No_genes_on_ref_contig_689	E005	0.013894454643632	3.86496948279202e-08	1.6740252746417e-06	71.7588814075045	-0.616053441987506
TGGT1_214780:E009	TGGT1_214780	E009	0.00579155581676201	3.87287295029029e-08	1.67570453990425e-06	173.086958358742	-0.308835037126188
TGGT1_314430:E018	TGGT1_314430	E018	0.0190040453716605	3.87299767320409e-08	1.67570453990425e-06	52.4109940633233	0.777294683310459
TGGT1_270000:E034	TGGT1_270000	E034	0.0231756435143296	3.87873659323628e-08	1.6772886923135e-06	42.955343105992	-0.869776685307812
TGGT1_207480:E059	TGGT1_207480	E059	0.0334585230518845	3.88203927288406e-08	1.67781820501228e-06	29.7327549797934	1.29147472314672
TGGT1_213060:E019	TGGT1_213060	E019	0.0148565771613225	3.88495139427386e-08	1.67817844203692e-06	67.0950193230142	-0.684858699643288
TGGT1_222330:E001	TGGT1_222330	E001	0.00621311221853263	3.8875792509155e-08	1.67841556589659e-06	161.241642994533	-0.368995139760664
TGGT1_266010:E060	TGGT1_266010	E060	0.0690403499954703	3.90970725672211e-08	1.68706689134933e-06	14.3973485302997	1.73300222173218
TGGT1_312905:E009	TGGT1_312905	E009	0.00709702155997691	3.91399522298884e-08	1.68801498038464e-06	485.488827416713	0.428080077682818
TGGT1_204340:E008	TGGT1_204340	E008	0.00324995467983359	3.92221715144851e-08	1.69065777748102e-06	310.701580795473	0.310508323929366
TGGT1_294898:E023	TGGT1_294898	E023	0.00893665989350336	3.93432440341572e-08	1.6949716153136e-06	111.807065747468	0.525846805637337
TGGT1_270000:E021	TGGT1_270000	E021	0.0115940082464896	3.94040878581827e-08	1.69668748438954e-06	86.0627051145719	0.623200292168909
TGGT1_283810:E020	TGGT1_283810	E020	0.027289944084761	3.98183593210981e-08	1.71361153506869e-06	36.4666345145384	0.955745928981257
TGGT1_314265:E003	TGGT1_314265	E003	0.0470693125485186	3.99084979525652e-08	1.71657569643066e-06	21.1253567181126	1.22466382328528
TGGT1_260230:E009	TGGT1_260230	E009	0.0286467438013257	3.99486317378918e-08	1.71738699859355e-06	34.7362457559634	-0.944348299662206
TGGT1_320135:E001	TGGT1_320135	E001	0.0116091069034517	4.06319924443207e-08	1.74583497072497e-06	99.98759960234	-0.419416583280848
TGGT1_279380:E021	TGGT1_279380	E021	0.0294546474900712	4.07773402218098e-08	1.75114817170628e-06	38.8852250946987	1.00906706396086
TGGT1_297510:E001	TGGT1_297510	E001	0.0153234732313436	4.08396048034629e-08	1.75288968304496e-06	65.0435541766165	0.720675487228149
TGGT1_207430:E010	TGGT1_207430	E010	0.0510171018232483	4.08868019139436e-08	1.75373925094488e-06	19.4889340818159	1.40191754824436
TGGT1_320515:E005	TGGT1_320515	E005	0.117500501966326	4.09028427513371e-08	1.75373925094488e-06	8.45683069719492	14.8587224365362
TGGT1_207480:E074	TGGT1_207480	E074	0.0360980488853564	4.10611835357986e-08	1.75959376473604e-06	27.5554560935945	1.36628694541495
TGGT1_304700:E015	TGGT1_304700	E015	0.0189907824164565	4.11113142243779e-08	1.7608074026022e-06	52.4477001872703	0.974968314112446
TGGT1_261650:E022	TGGT1_261650	E022	0.0189942124136866	4.14087067633049e-08	1.77260442234115e-06	52.438202510337	0.795884906263272
TGGT1_277260:E004	TGGT1_277260	E004	0.0219186873581662	4.14896888697584e-08	1.77512985209324e-06	45.4246693623313	0.859535527785113
TGGT1_255680:E005	TGGT1_255680	E005	0.0120937308821057	4.20721279656551e-08	1.79909600175167e-06	369.106605398341	-0.452940462776059
TGGT1_258880:E004	TGGT1_258880	E004	0.040942237373241	4.23315248075002e-08	1.8082728335098e-06	31.2241067703724	1.15045688766711
TGGT1_300048:E002	TGGT1_300048	E002	0.00578279237554358	4.23145668709778e-08	1.8082728335098e-06	193.119751434572	0.404843624285863
TGGT1_216880:E002	TGGT1_216880	E002	0.000128444636481305	4.2432308573608e-08	1.81161947789013e-06	13202.8119555352	-0.0213582324652572
TGGT1_269710:E004	TGGT1_269710	E004	0.0266308860523905	4.25554508622875e-08	1.81591666245601e-06	37.3709134896038	0.954244586753343
TGGT1_218310:E031	TGGT1_218310	E031	0.0213062537187711	4.27870010300277e-08	1.8248328199468e-06	46.7336396713575	-0.84157478210373
TGGT1_280390:E001	TGGT1_280390	E001	0.00230324125212953	4.39413230592783e-08	1.87307429629928e-06	441.431374053255	-0.224765340301482
TGGT1_207400:E016	TGGT1_207400	E016	0.00944586372220555	4.43195805566277e-08	1.88737068168961e-06	105.745666811344	0.182574335905589
TGGT1_235150:E005	TGGT1_235150	E005	0.0838512561261527	4.43234633366385e-08	1.88737068168961e-06	11.852685470713	2.35473991211003
TGGT1_285840:E012	TGGT1_285840	E012	0.00880114723172579	4.44667334122594e-08	1.89247323249276e-06	113.539049274245	-0.489829993416298
TGGT1_228190:E007	TGGT1_228190	E007	0.0187127160660213	4.4544673124638e-08	1.89434343677666e-06	53.2292827802443	0.80156827497983
TGGT1_297940:E011	TGGT1_297940	E011	0.00312854188606593	4.45576043406066e-08	1.89434343677666e-06	377.185521109818	0.279259613502124
TGGT1_306430:E027	TGGT1_306430	E027	0.00388644159488824	4.46515333653951e-08	1.89733765592377e-06	259.111222523125	-0.342360368286424
TGGT1_243610:E002	TGGT1_243610	E002	0.00896685279619856	4.47576392526022e-08	1.90084587325557e-06	380.281644564911	0.354446801082581
TGGT1_269442:E004	TGGT1_269442	E004	0.000608921798276203	4.52753085463022e-08	1.9218202079315e-06	1787.33335159106	-0.100898044153378
TGGT1_221980:E002	TGGT1_221980	E002	0.0186491919569677	4.54632839114243e-08	1.92878519526476e-06	53.4111147389806	0.802439074815295
TGGT1_226990:E001	TGGT1_226990	E001	0.0552702913785602	4.56458541675958e-08	1.93551367448574e-06	17.9877656469767	1.35872699855133
TGGT1_250220:E037	TGGT1_250220	E037	0.0374092100750576	4.61921063226034e-08	1.95764813855926e-06	26.5882848183423	1.13767277262329
TGGT1_285830:E009	TGGT1_285830	E009	0.00445311691481976	4.63076100310598e-08	1.96151358649403e-06	225.739578020898	-0.350189410595513
TGGT1_213920:E011	TGGT1_213920	E011	0.0161525388717847	4.65349117453102e-08	1.96907552398198e-06	61.6940111087084	0.710335058553976
TGGT1_216290A:E016	TGGT1_216290A	E016	0.04461843169721	4.65140502505299e-08	1.96907552398198e-06	22.2871536767361	1.51607277597373
TGGT1_265500:E003	TGGT1_265500	E003	0.0230360334705603	4.67076630991768e-08	1.97535001587849e-06	43.2162770534464	0.867897165497139
TGGT1_227440:E006	TGGT1_227440	E006	0.00691533044758095	4.68018235820428e-08	1.97829593031216e-06	158.218651452137	-0.358489006755217
TGGT1_249790:E019	TGGT1_249790	E019	0.00890145983085522	4.69006758416988e-08	1.97937014524643e-06	112.251856342919	-0.504823668194403
TGGT1_270880:E013	TGGT1_270880	E013	0.00342491328520447	4.68885995323073e-08	1.97937014524643e-06	1288.59585109073	0.266452672998325
TGGT1_297430:E011	TGGT1_297430	E011	0.00183369190167223	4.69007876120198e-08	1.97937014524643e-06	557.846201525137	0.199940178432861
TGGT1_238000:E010	TGGT1_238000	E010	0.00388076908618843	4.70932567068586e-08	1.98645458737107e-06	259.495230416616	0.276687678519026
TGGT1_220940:E008	TGGT1_220940	E008	0.0141675897790334	4.73942417998783e-08	1.99810658575101e-06	70.3702352049022	0.675523807593479
TGGT1_304700:E027	TGGT1_304700	E027	0.0221930840484867	4.75791602148167e-08	2.00485568890565e-06	44.8616859331763	1.07194395886577
TGGT1_203590:E010	TGGT1_203590	E010	0.0122452218115649	4.78206392038832e-08	2.01397981540193e-06	81.4658240851256	-0.571046516836544
No_genes_on_ref_contig_505+No_genes_on_ref_contig_529+No_genes_on_ref_contig_528+No_genes_on_ref_contig_527+No_genes_on_ref_contig_526+No_genes_on_ref_contig_525+No_genes_on_ref_contig_524+No_genes_on_ref_contig_523+No_genes_on_ref_contig_522+No_genes_on_ref_contig_521+No_genes_on_ref_contig_520+No_genes_on_ref_contig_516+No_genes_on_ref_contig_517+No_genes_on_ref_contig_514+No_genes_on_ref_conti…	No_genes_on_ref_contig_505+No_genes_on_ref_contig_529+No_genes_on_ref_contig_528+No_genes_on_ref_contig_527+No_genes_on_ref_contig_526+No_genes_on_ref_contig_525+No_genes_on_ref_contig_524+No_genes_on_ref_contig_523+No_genes_on_ref_contig_522+No_genes_on_ref_contig_521+No_genes_on_ref_contig_520+No_genes_on_ref_contig_516+No_genes_on_ref_contig_517+No_genes_on_ref_contig_514+No_genes_on_ref_conti…	E056	0.00294413890416492	4.79236790855159e-08	2.01726706515596e-06	343.569091421794	0.281506067456474
TGGT1_249810:E032	TGGT1_249810	E032	0.00590904746045875	4.79972618517253e-08	2.01850689893943e-06	169.614134596767	-0.435691117836417
TGGT1_250940:E012	TGGT1_250940	E012	0.00152386894904987	4.80031367556042e-08	2.01850689893943e-06	675.367835123046	-0.209011912620768
TGGT1_260340:E014	TGGT1_260340	E014	0.00676588022890079	4.80798874582974e-08	2.02068178758232e-06	147.963871775715	-0.384538741079401
TGGT1_250740:E007	TGGT1_250740	E007	0.0568717436915076	4.8123809046037e-08	2.02147540235785e-06	17.4807734741206	1.45650362995071
TGGT1_214150:E005	TGGT1_214150	E005	0.0277307612221531	4.8369905903973e-08	2.03075629389353e-06	62.7260387223003	0.891995884849931
TGGT1_290920:E001	TGGT1_290920	E001	0.00189165471868632	4.85518284357047e-08	2.03733465112091e-06	540.258270013671	-0.186415075157511
TGGT1_309140:E018	TGGT1_309140	E018	0.0462052561067122	4.96362434386551e-08	2.08175694234796e-06	21.5208647053528	1.30539745065698
TGGT1_218790:E016	TGGT1_218790	E016	0.00379962595193378	4.98869292608584e-08	2.09071078769165e-06	265.115612495041	-0.311270909820657
TGGT1_319540:E009	TGGT1_319540	E009	0.0164249570593951	4.99015258299598e-08	2.09071078769165e-06	60.6674513521806	0.71123434832721
TGGT1_263090:E011	TGGT1_263090	E011	0.0141207414557992	5.03168320678793e-08	2.10701734284245e-06	268.706813190036	0.597815512839632
TGGT1_306020:E020	TGGT1_306020	E020	0.0634008061144414	5.0588631144941e-08	2.11730074416112e-06	15.6790780868573	1.75082344585545
TGGT1_250360:E002	TGGT1_250360	E002	0.070048711192008	5.06412687191035e-08	2.11840561141804e-06	14.1899390746563	1.66890842818078
TGGT1_315600:E005	TGGT1_315600	E005	0.0610635657363957	5.07092362881957e-08	2.12015028054245e-06	16.2797265743685	1.79472728298509
TGGT1_219738:E004	TGGT1_219738	E004	0.0526749468157669	5.08690164769646e-08	2.1246301320578e-06	18.8749361921523	1.54328928124791
TGGT1_288380:E007	TGGT1_288380	E007	0.0162346147551166	5.08462727328759e-08	2.1246301320578e-06	150.811949864172	0.649026682287666
TGGT1_285490:E018	TGGT1_285490	E018	0.0731922812642547	5.12383280432888e-08	2.13894850805322e-06	13.5800452028123	1.99273499120288
TGGT1_272695:E013	TGGT1_272695	E013	0.0155245001491999	5.12970839647119e-08	2.14029461182998e-06	64.198407455057	0.711384689186616
TGGT1_202830:E008	TGGT1_202830	E008	0.0185415912305326	5.17687718631646e-08	2.15885939895279e-06	70.0218418411392	0.723327112870536
TGGT1_222410:E013	TGGT1_222410	E013	0.0313303236388041	5.25843829724874e-08	2.19173988605254e-06	31.7558714418272	1.35836506115877
TGGT1_311230:E022	TGGT1_311230	E022	0.00104289028725152	5.26629678868468e-08	2.19388272050804e-06	5728.98989888473	-0.11479882382724
TGGT1_232730:E006	TGGT1_232730	E006	0.0222787130528066	5.34393313861112e-08	2.2250770600607e-06	44.6888456381008	0.854927074019219
TGGT1_305290:E005	TGGT1_305290	E005	0.0218389172545894	5.40739814124205e-08	2.25034169553184e-06	45.5909954543395	0.856005670350415
TGGT1_204070:E016	TGGT1_204070	E016	0.0132570891058109	5.44417863684589e-08	2.26448100075091e-06	75.2227618218891	0.623186998309764
TGGT1_299110:E008	TGGT1_299110	E008	0.0902248014741354	5.50085351567606e-08	2.28687646028891e-06	38.2992118346769	1.52369199573516
TGGT1_318440:E012	TGGT1_318440	E012	0.0514805274262209	5.54387750851749e-08	2.30357668888399e-06	19.3133139541553	1.44192267134998
TGGT1_319640:E009	TGGT1_319640	E009	0.0607106426374664	5.55991753045515e-08	2.30905319866922e-06	43.5235658805792	1.28789134684633
TGGT1_235340:E004	TGGT1_235340	E004	0.0204400261421579	5.62792420143607e-08	2.33609491209739e-06	321.727678885399	0.671005523678905
TGGT1_212930:E013	TGGT1_212930	E013	0.0984335315024613	5.65760440584427e-08	2.34720807659731e-06	15.8680092144912	1.904612023314
TGGT1_233710:E012	TGGT1_233710	E012	0.135085514138401	5.67370799855459e-08	2.35268009893839e-06	22.9525720360213	2.10365961760552
TGGT1_204330:E003	TGGT1_204330	E003	0.052808325395061	5.72312344709625e-08	2.37195262577678e-06	18.8272154653027	1.40222421343772
TGGT1_206550:E025	TGGT1_206550	E025	0.0115226533054483	5.74703519540464e-08	2.38064077219597e-06	86.598127994837	0.886134914526075
TGGT1_285470:E010	TGGT1_285470	E010	0.0330030084906365	5.7576237898572e-08	2.38380388038011e-06	30.143795588695	1.05282078483408
TGGT1_319540:E017	TGGT1_319540	E017	0.0465810858223582	5.78851074033756e-08	2.39536347832472e-06	21.3470295294977	1.46244976738449
TGGT1_204055:E009	TGGT1_204055	E009	0.00385656931162488	5.80049823823624e-08	2.3970690892409e-06	364.504421796755	-0.212761871934162
TGGT1_264860:E014	TGGT1_264860	E014	0.0379411956330493	5.79722977781224e-08	2.3970690892409e-06	26.2149584069624	1.24897361376304
TGGT1_309190:E001	TGGT1_309190	E001	0.0017802903612697	5.80153960534676e-08	2.3970690892409e-06	575.094933928836	-0.164969613221359
TGGT1_244700:E023	TGGT1_244700	E023	0.0203267179945346	5.82152733678495e-08	2.40409723547485e-06	48.991624957037	-0.811715852896849
TGGT1_233850:E002	TGGT1_233850	E002	0.0181790775740541	5.84746310142073e-08	2.4135732796176e-06	79.7110009450603	-0.646983143879464
TGGT1_211410:E017	TGGT1_211410	E017	0.0725885586236345	5.89477319361096e-08	2.43185750529474e-06	13.6930739751814	1.77033602894949
TGGT1_273090:E023	TGGT1_273090	E023	0.0619881005590268	5.91791448759433e-08	2.44015743695571e-06	16.0367104746982	1.50372083058489
TGGT1_243580:E007	TGGT1_243580	E007	0.0182543800515749	5.94263906589954e-08	2.44910140370291e-06	54.5696859006921	0.773797258213379
TGGT1_295650:E011	TGGT1_295650	E011	0.00623467393731538	5.97411812772552e-08	2.46081850531592e-06	287.328366053702	-0.363652892505487
TGGT1_286220:E013	TGGT1_286220	E013	0.109792040787928	5.99166592591094e-08	2.46678811080275e-06	9.05086978176959	13.7051641318306
TGGT1_239250:E007	TGGT1_239250	E007	0.00662983417717332	6.02025555717572e-08	2.47729527221499e-06	151.024700226449	0.429979584823723
TGGT1_202640:E022	TGGT1_202640	E022	0.0412452507407079	6.14674503611501e-08	2.52805634483314e-06	24.112229872072	1.28216755585983
TGGT1_203910:E001	TGGT1_203910	E001	0.00246461807553831	6.18221210535769e-08	2.54134874911432e-06	411.889727501187	0.247039075149982
TGGT1_301410:E002	TGGT1_301410	E002	0.0513806693666819	6.22559828141706e-08	2.55788130916136e-06	19.3508881940943	1.439085782614
TGGT1_257100:E004	TGGT1_257100	E004	0.0124995193582672	6.24406175218658e-08	2.56416238841701e-06	87.6539072832225	0.351884184390389
TGGT1_255240:E021	TGGT1_255240	E021	0.130077202044583	6.30848045290746e-08	2.58929928503042e-06	7.63883529199417	14.3010439508111
TGGT1_410800:E011	TGGT1_410800	E011	0.00696678062970719	6.39659875873092e-08	2.62413313407592e-06	143.66420843324	-0.452183398621513
TGGT1_232110:E003	TGGT1_232110	E003	0.019120748021742	6.41929424615671e-08	2.63210625171895e-06	264.585025718001	-0.261986254042022
TGGT1_266372:E003	TGGT1_266372	E003	0.00468820119335209	6.43514425343052e-08	2.63726584416606e-06	267.512472961387	-0.231726927973341
TGGT1_235930:E006	TGGT1_235930	E006	0.00048798378178335	6.44457239629577e-08	2.63978971291192e-06	2284.51017515922	-0.0832123676621892
TGGT1_221922:E001	TGGT1_221922	E001	0.000598702964094844	6.45808266772384e-08	2.64323016183763e-06	1820.81620009712	0.0897058776671563
TGGT1_309770:E012	TGGT1_309770	E012	0.00267247614646734	6.45951955075946e-08	2.64323016183763e-06	379.203169550623	0.163082009373342
TGGT1_271880:E015	TGGT1_271880	E015	0.0552131690684901	6.51491817972433e-08	2.66454872968614e-06	18.0063933409174	1.42895167016371
TGGT1_280390:E030	TGGT1_280390	E030	0.120337085739092	6.55268493128997e-08	2.67863806545669e-06	8.25739823179135	14.3899234747035
TGGT1_201230:E014	TGGT1_201230	E014	0.0250575677128353	6.57051568251661e-08	2.68456773091082e-06	39.7223579033382	0.906163567823331
No_genes_on_ref_contig_772+No_genes_on_ref_contig_755+No_genes_on_ref_contig_756+No_genes_on_ref_contig_757+No_genes_on_ref_contig_751+No_genes_on_ref_contig_752+No_genes_on_ref_contig_773+No_genes_on_ref_contig_754+No_genes_on_ref_contig_758+No_genes_on_ref_contig_759+No_genes_on_ref_contig_771+No_genes_on_ref_contig_770+No_genes_on_ref_contig_774+No_genes_on_ref_contig_753+No_genes_on_ref_conti…	No_genes_on_ref_contig_772+No_genes_on_ref_contig_755+No_genes_on_ref_contig_756+No_genes_on_ref_contig_757+No_genes_on_ref_contig_751+No_genes_on_ref_contig_752+No_genes_on_ref_contig_773+No_genes_on_ref_contig_754+No_genes_on_ref_contig_758+No_genes_on_ref_contig_759+No_genes_on_ref_contig_771+No_genes_on_ref_contig_770+No_genes_on_ref_contig_774+No_genes_on_ref_contig_753+No_genes_on_ref_conti…	E032	0.0147240877359114	6.5775599082951e-08	2.68608649062319e-06	67.700939721865	-0.673625103214862
TGGT1_278040:E002	TGGT1_278040	E002	0.00971882996834696	6.62009328426981e-08	2.702089137035e-06	102.759307404122	0.520937564337276
TGGT1_306350:E017	TGGT1_306350	E017	0.012067464454192	6.65041967400529e-08	2.7130956664013e-06	100.290803945448	-0.249883121543452
TGGT1_231200:E009	TGGT1_231200	E009	0.0517615018175265	6.67235732625092e-08	2.720670549166e-06	19.2083685565562	1.39589086429291
TGGT1_320580:E001	TGGT1_320580	E001	0.0777839518803882	6.68078955783243e-08	2.72273369485917e-06	12.7778516602048	1.85214544690128
TGGT1_289170:E005	TGGT1_289170	E005	0.117015117162255	6.72937778884554e-08	2.74027307793431e-06	8.49192603220732	2.24220323890434
TGGT1_290640:E008	TGGT1_290640	E008	0.0149307946854227	6.7306143723834e-08	2.74027307793431e-06	66.7603125631805	0.718081738175179
TGGT1_215690:E008	TGGT1_215690	E008	0.0142385834706166	6.74598078071369e-08	2.74514495126472e-06	70.0180523852133	-0.631201397360586
TGGT1_212145:E001	TGGT1_212145	E001	0.031502220581302	6.78521984405852e-08	2.75856083644631e-06	31.5822971983817	-0.12048029075673
TGGT1_232340:E006	TGGT1_232340	E006	0.0498437317536733	6.78578289611987e-08	2.75856083644631e-06	19.9482129527874	1.32456221288443
TGGT1_249170:E019	TGGT1_249170	E019	0.0663179025032882	6.79693286476378e-08	2.76170294331507e-06	14.9888555209286	1.70415533709372
TGGT1_281510:E018	TGGT1_281510	E018	0.0532288931961273	6.83656162406265e-08	2.77640745834355e-06	18.6783105335687	1.43630561046516
TGGT1_211675:E002	TGGT1_211675	E002	0.0589519970034338	6.88998123400915e-08	2.79669499712282e-06	16.8633678811911	1.32674772822198
TGGT1_297520:E001	TGGT1_297520	E001	0.031234674142334	6.93957533304221e-08	2.81541012318172e-06	31.8532829574383	0.983426461697312
TGGT1_205170:E002	TGGT1_205170	E002	0.011302060456712	7.00350017704477e-08	2.83849190157485e-06	262.780649435777	0.470973482417285
TGGT1_312100:E001	TGGT1_312100	E001	0.00227188365219286	7.00185784455011e-08	2.83849190157485e-06	447.670355966115	-0.24921120739713
TGGT1_209450:E024	TGGT1_209450	E024	0.060068886438184	7.12187524560114e-08	2.88502056173411e-06	16.5495412217661	1.45614843129677
TGGT1_272320:E007	TGGT1_272320	E007	0.0189067757591419	7.1328037070841e-08	2.88799853205333e-06	52.6813937704775	0.762908176132629
TGGT1_206610:E004	TGGT1_206610	E004	0.0632305011387663	7.27111561814803e-08	2.94252390692321e-06	15.7213436732788	2.01145209944334
TGGT1_224210:E014	TGGT1_224210	E014	0.0310208204034757	7.2809031257402e-08	2.94500858645609e-06	50.9990079194267	0.922409039911119
TGGT1_294250:E016	TGGT1_294250	E016	0.111822021694619	7.34475026164446e-08	2.96934608099081e-06	8.88648498134653	14.4794340288911
TGGT1_217020:E038	TGGT1_217020	E038	0.00595421526371633	7.35825466875356e-08	2.97331677017927e-06	251.133152643543	0.353875349081597
TGGT1_215030:E005	TGGT1_215030	E005	0.120480670986019	7.40021671772615e-08	2.9872824835281e-06	8.24755296384539	14.7794580598836
[truncated: 6,844 more rows]
